# Supplementary material for: Loss of adaptive capacity in asthmatic patients revealed by biomarker fluctuation dynamics after rhinovirus challenge
Source: eLife journal article supplement (doi:10.7554/elife.47969), 2019-11-05

NB: In the process of generating the plots, extreme outliers were omitted from the plot whenever the resolution of the plot would have been compromised. Values of relative change that are not defined due to division by zero are not represented in the plots. When this scenario predominates in a given biomarker's time series, the time series of absolute changes within 10 days is displayed instead.

# P01H CellDensity\_In10e6\_Per\_ml Window Size = 10

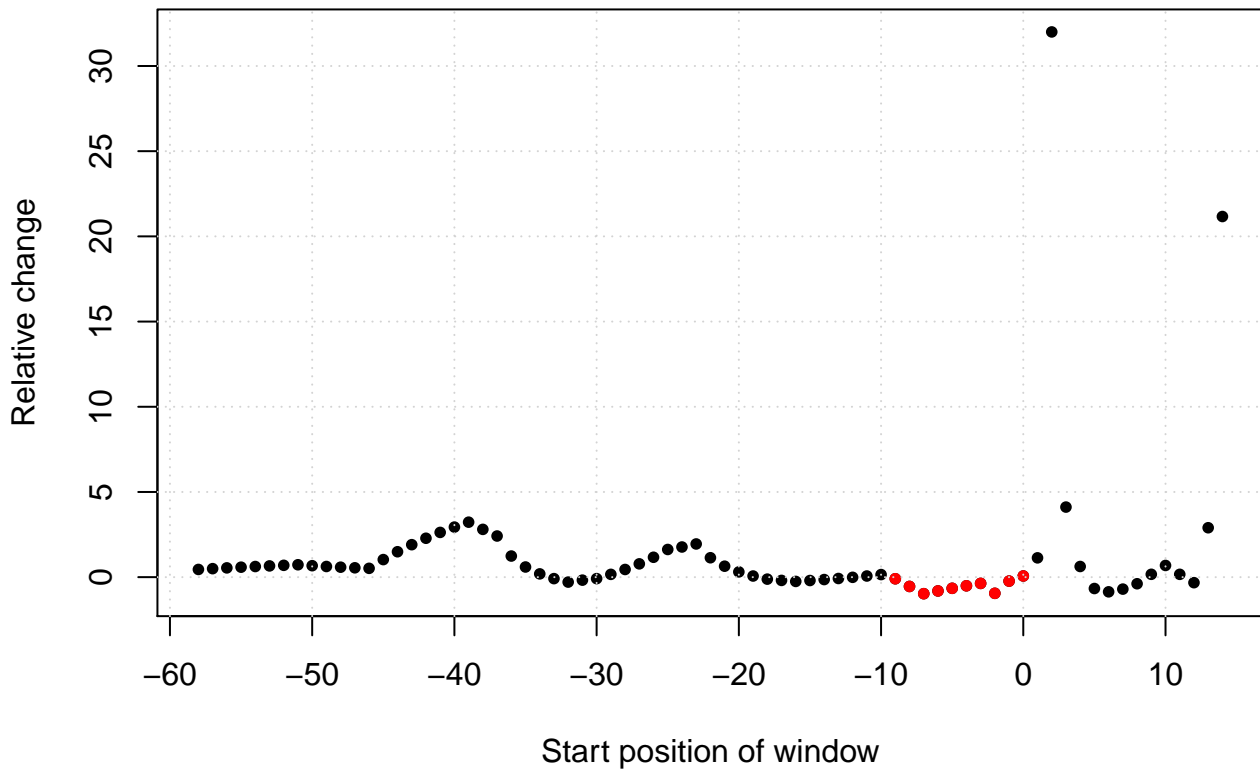

**P03H CellDensity\_In10e6\_Per\_ml Window Size = 10**

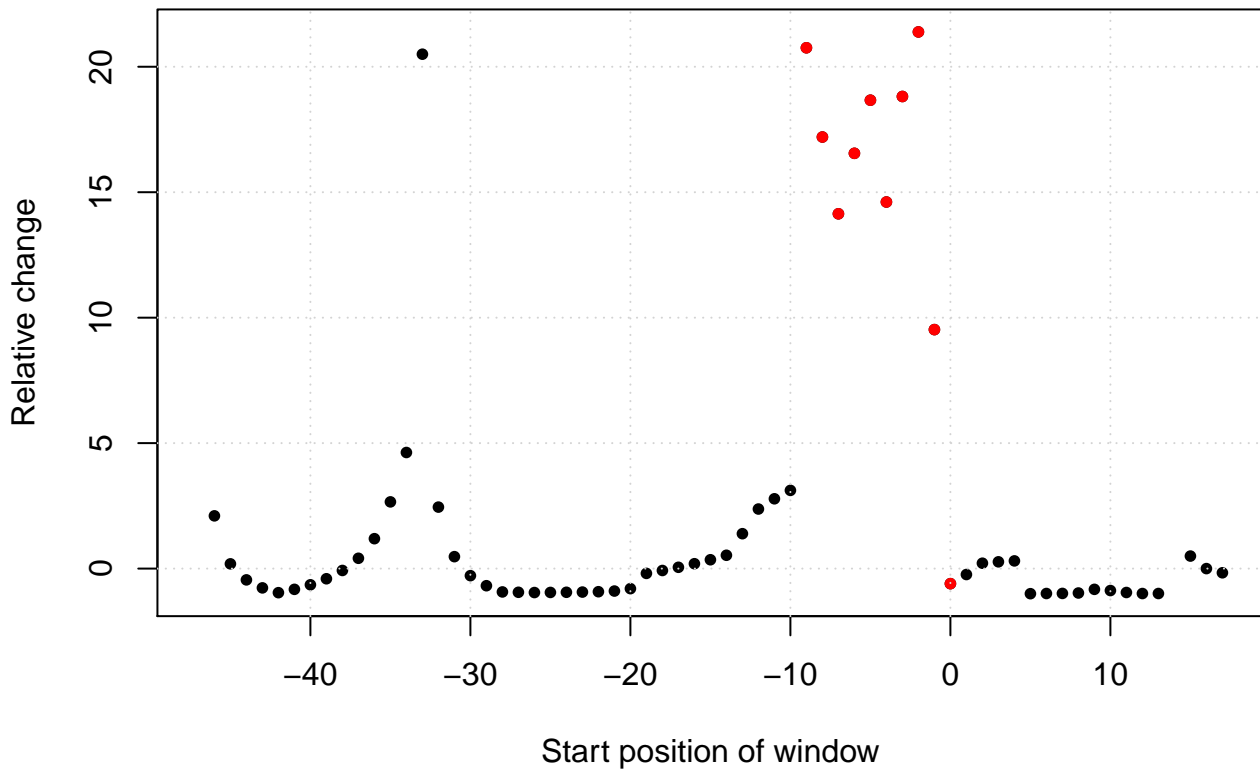

# P05H CellDensity\_In10e6\_Per\_ml Window Size = 10

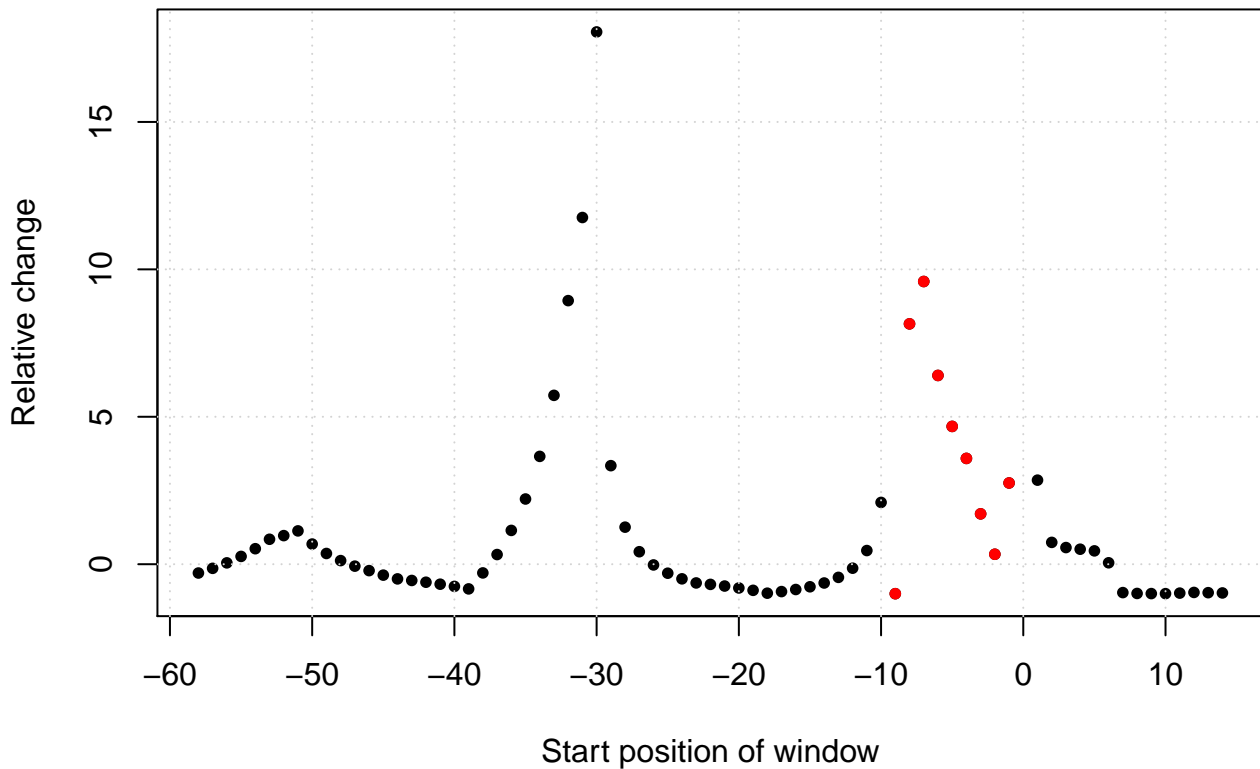

# P06H CellDensity\_In10e6\_Per\_ml Window Size = 10

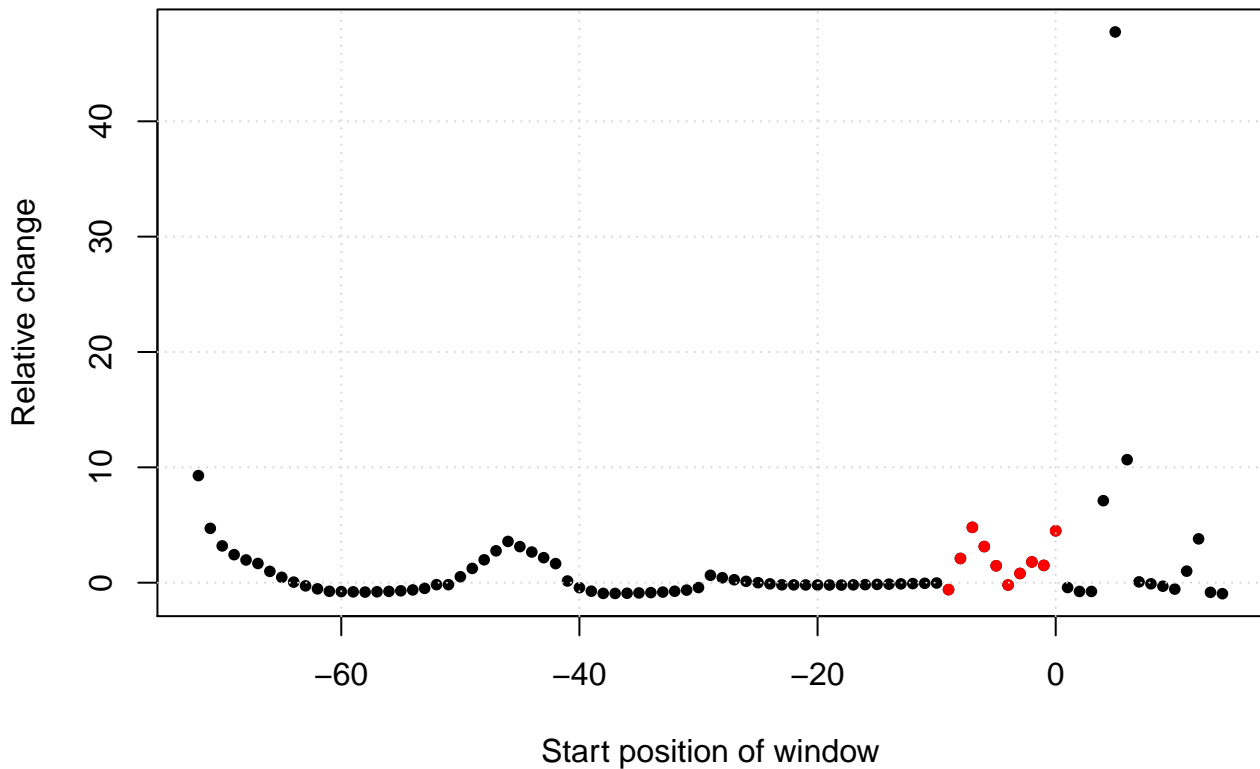

# P07H CellDensity\_In10e6\_Per\_ml Window Size = 10

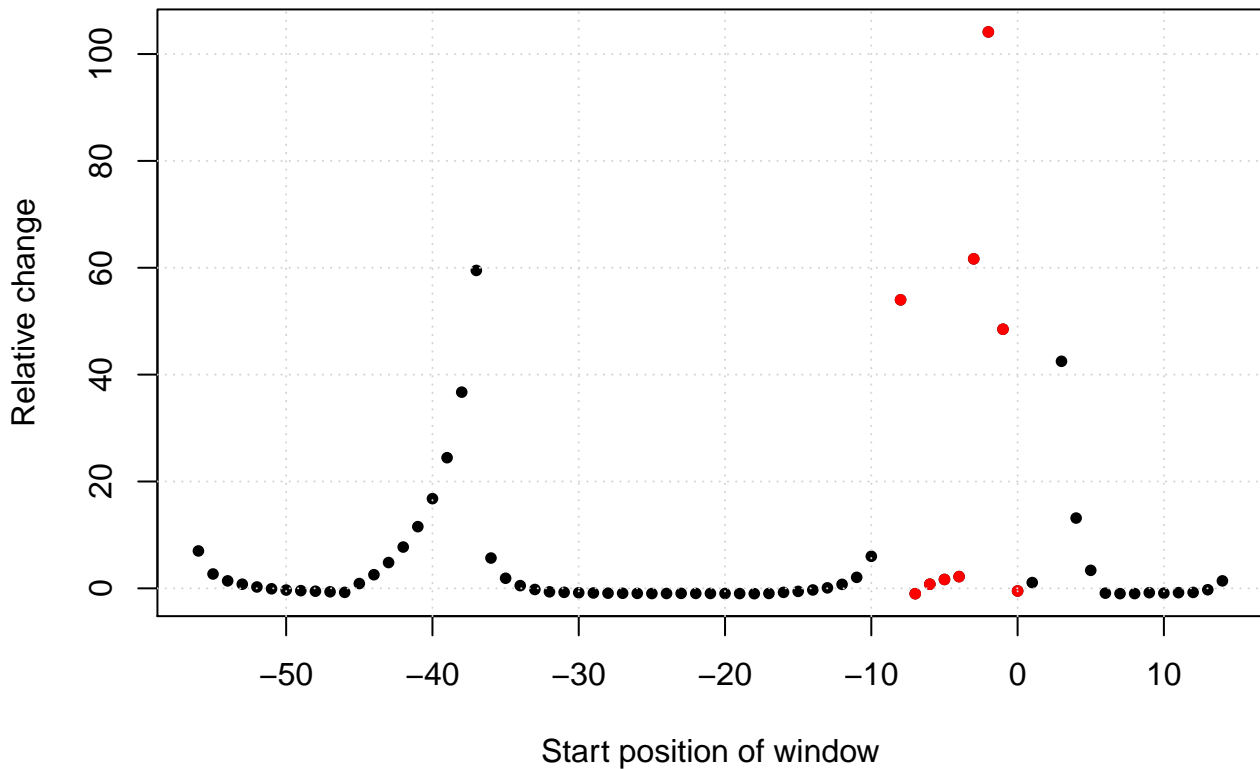

**P08H CellDensity\_In10e6\_Per\_ml Window Size = 10**

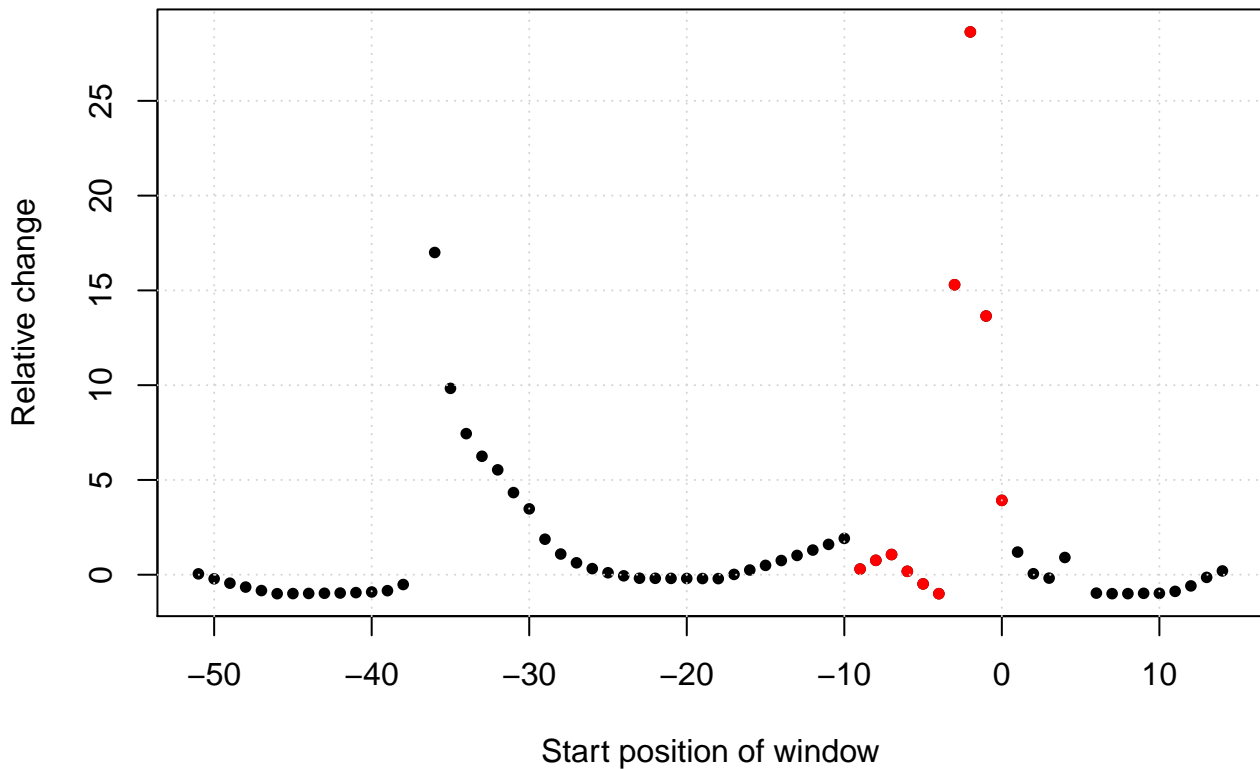

# P09H CellDensity\_In10e6\_Per\_ml Window Size = 10

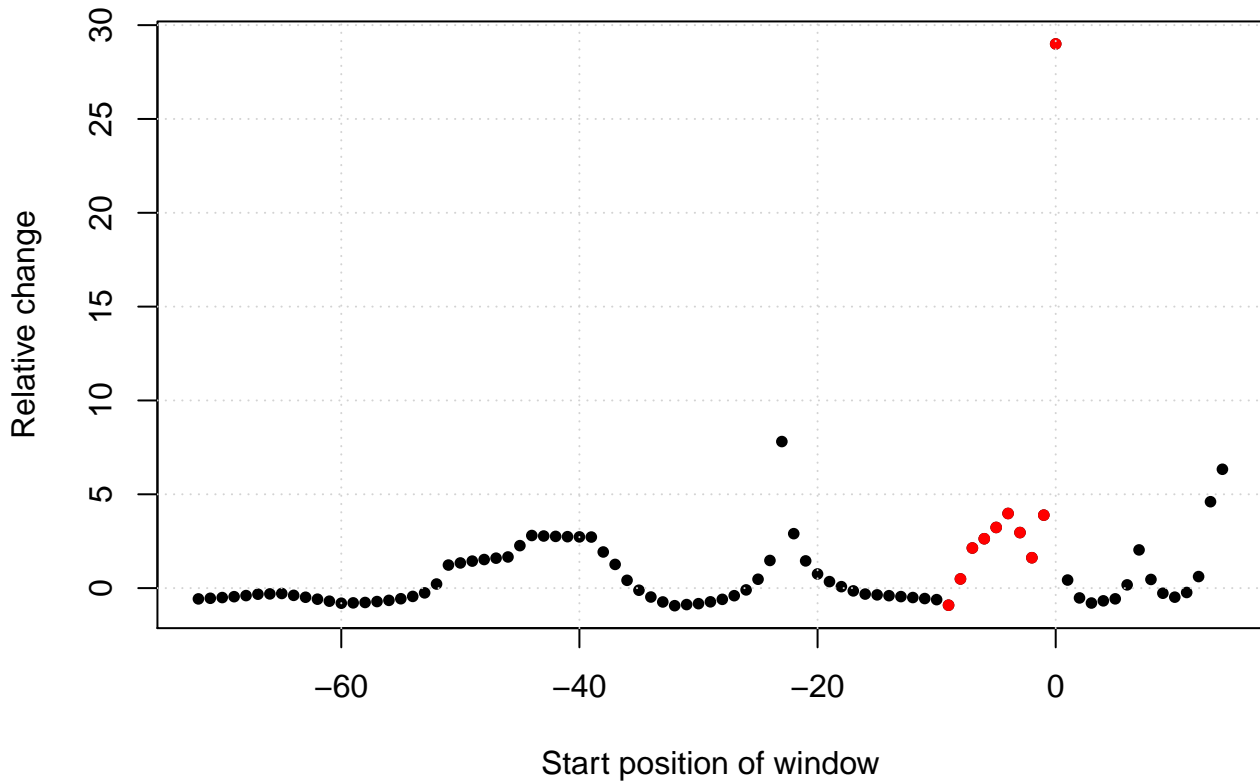



# P11H CellDensity\_In10e6\_Per\_ml Window Size = 10

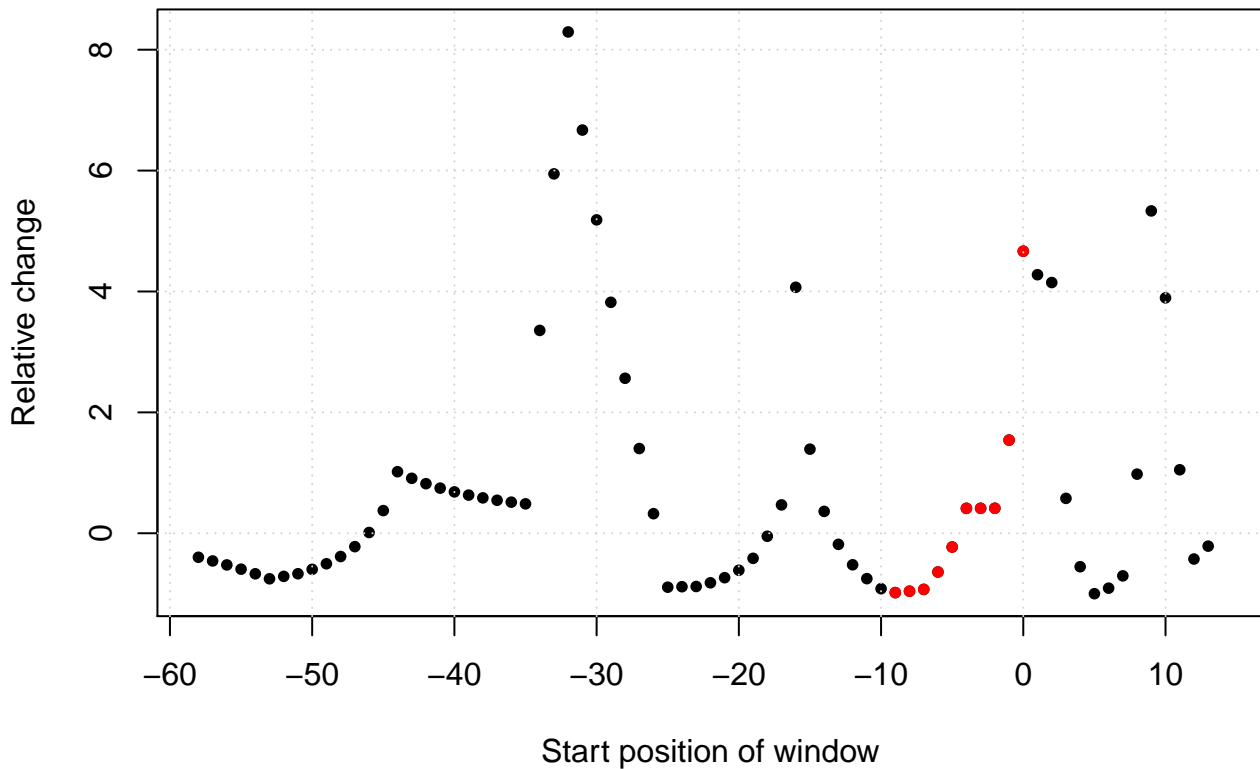

**P12H CellDensity\_In10e6\_Per\_ml Window Size = 10**

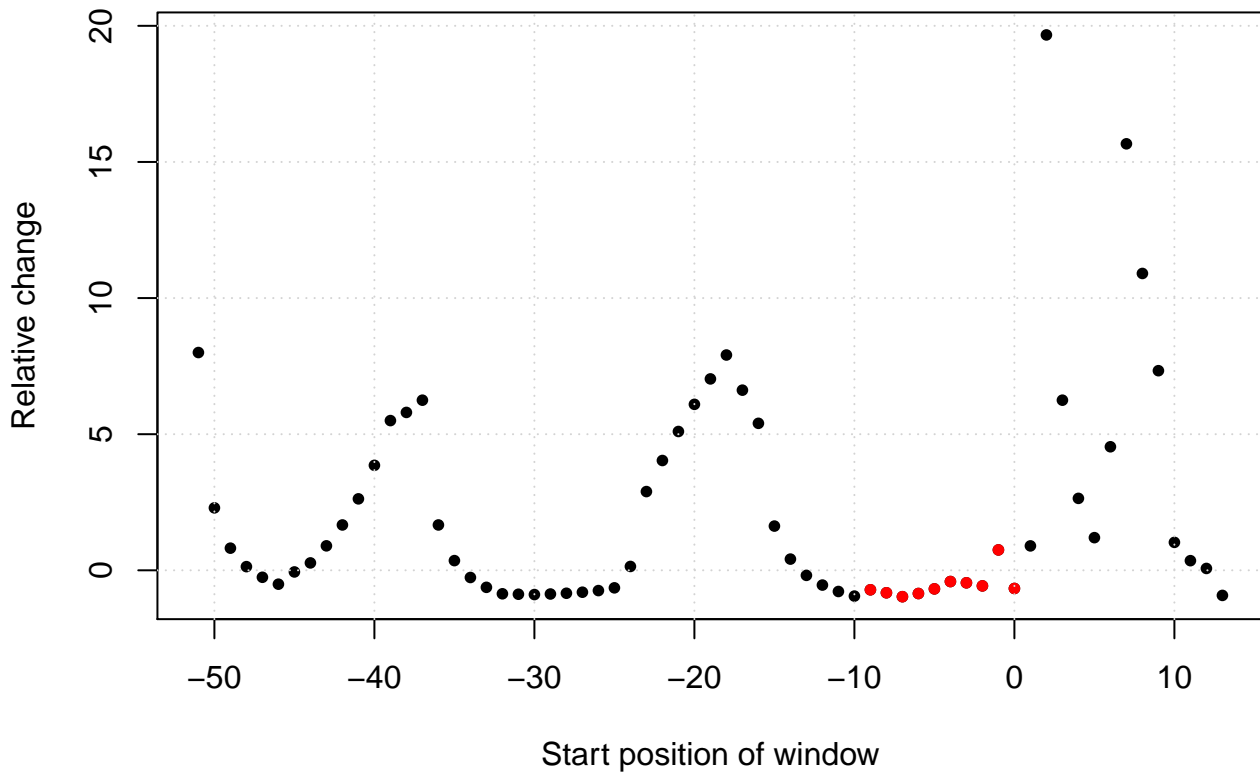

# P13H CellDensity\_In10e6\_Per\_ml Window Size = 10

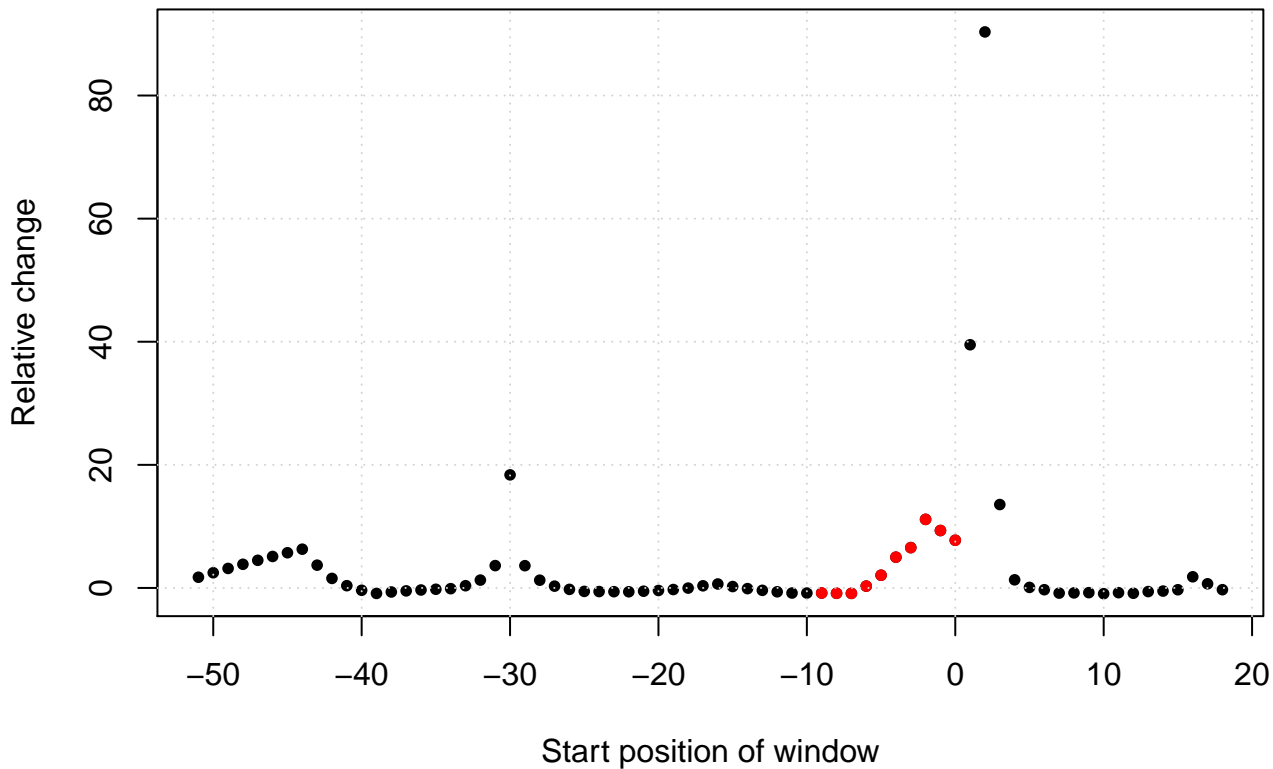

# P14H CellDensity\_In10e6\_Per\_ml Window Size = 10

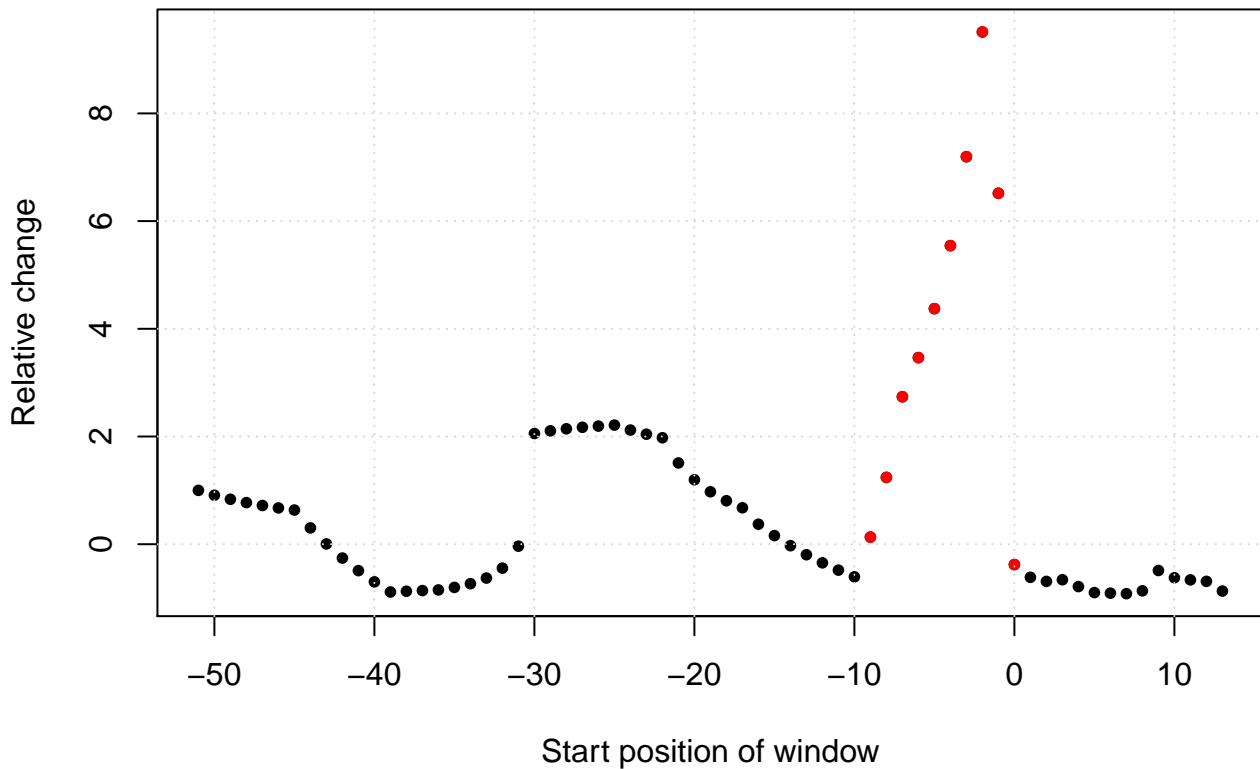

# P15H CellDensity\_In10e6\_Per\_ml Window Size = 10

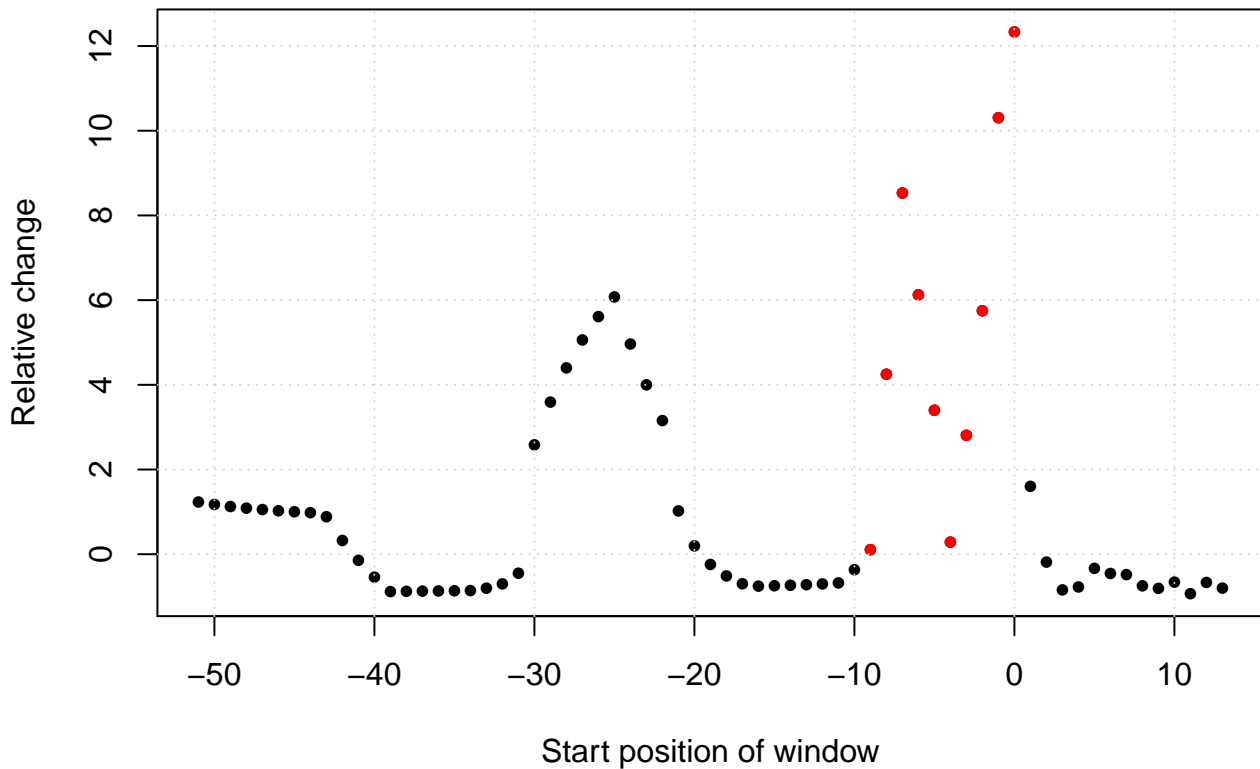

# P01A CellDensity\_In10e6\_Per\_ml Window Size = 10

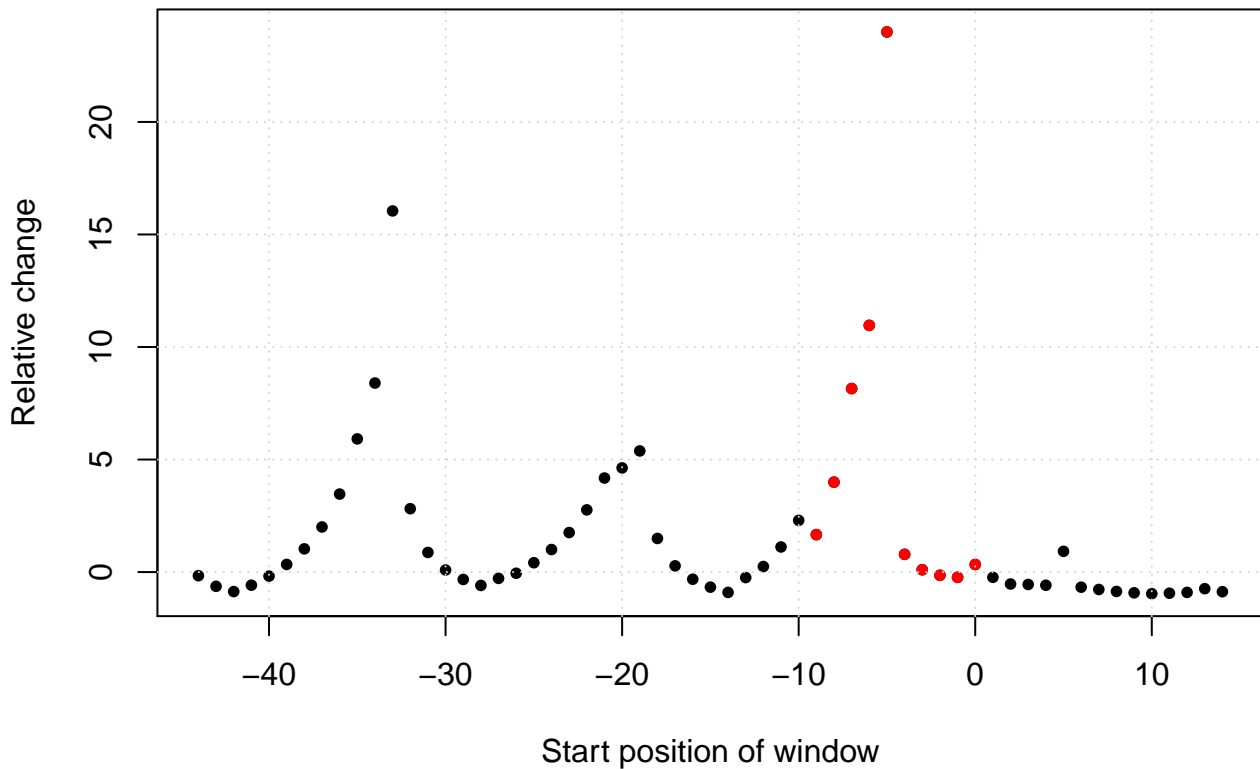

# P02A CellDensity\_In10e6\_Per\_ml Window Size = 10

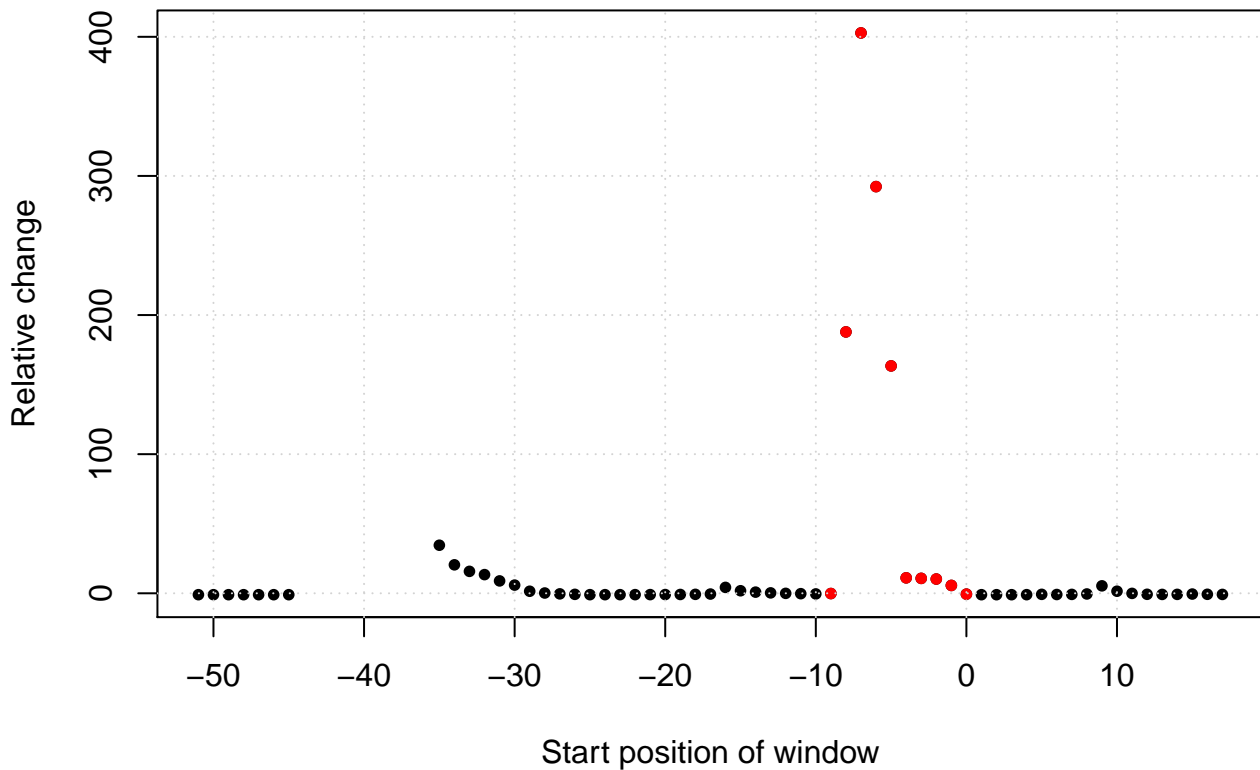

# P04A CellDensity\_In10e6\_Per\_ml Window Size = 10

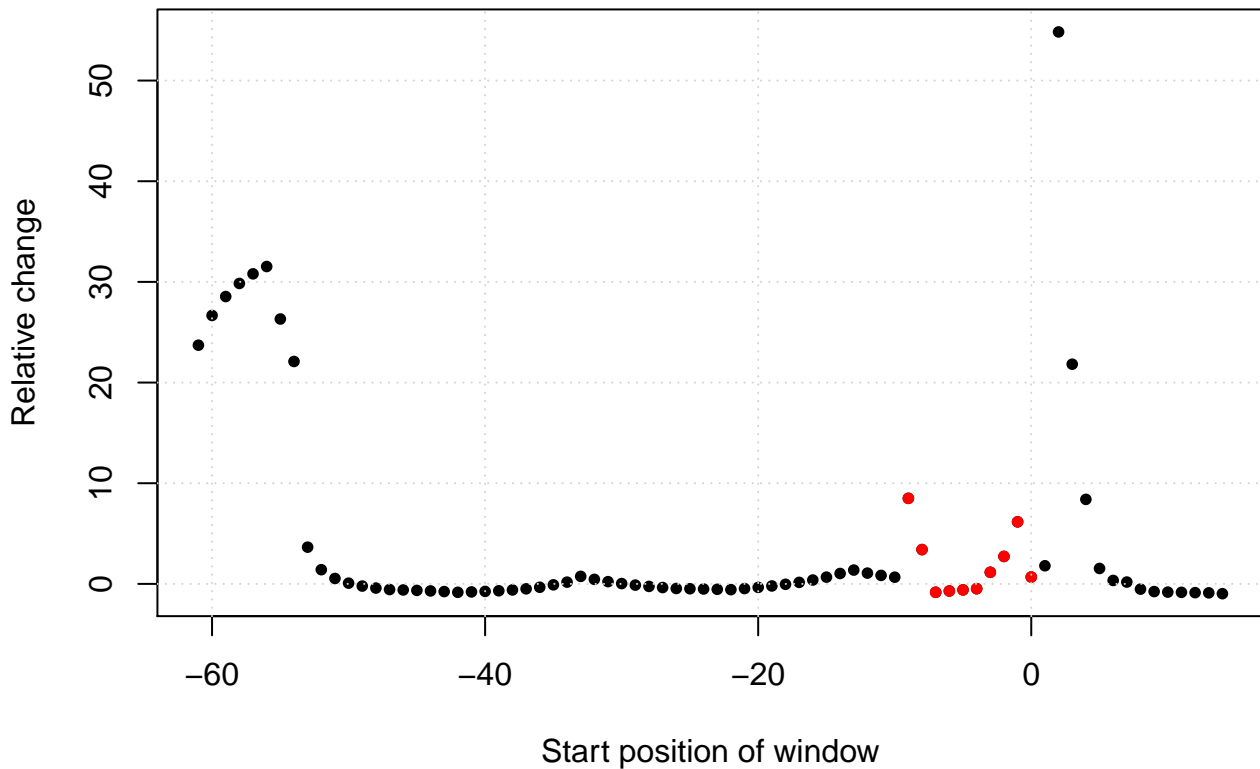



# P05A CellDensity\_In10e6\_Per\_ml Window Size = 10

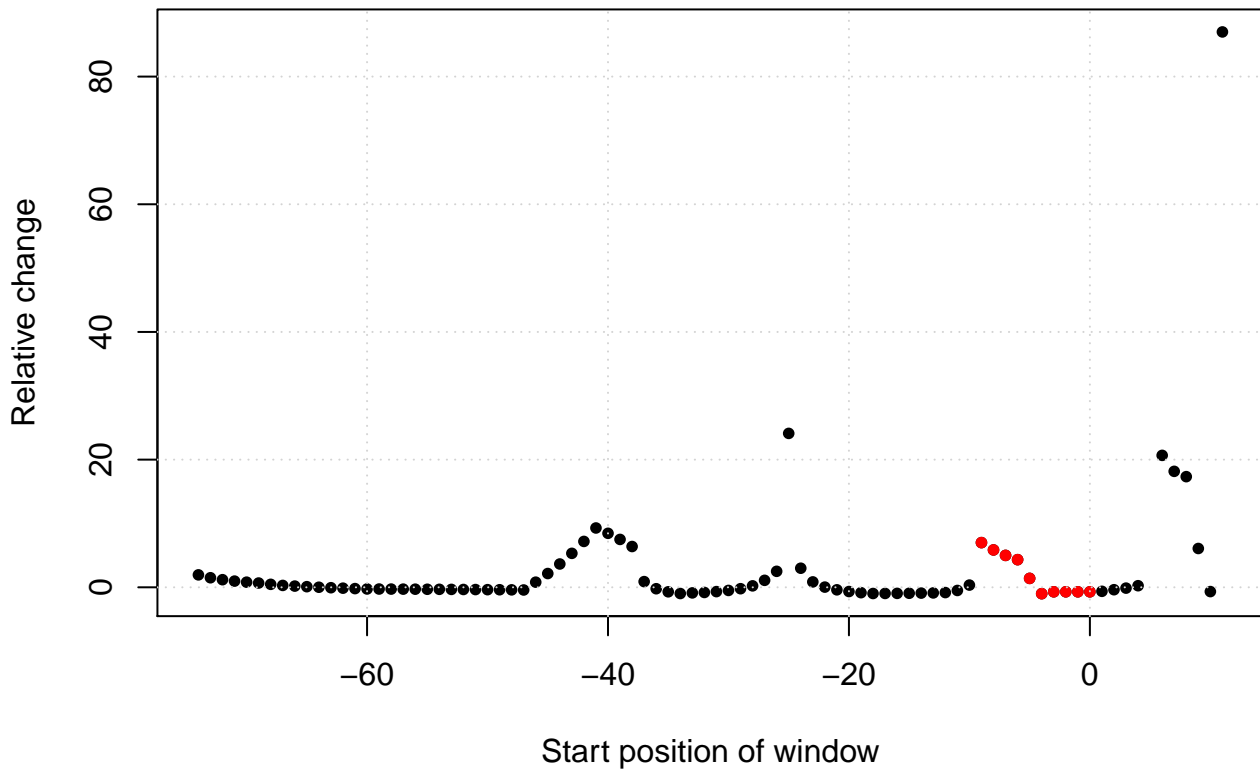

# P06A CellDensity\_In10e6\_Per\_ml Window Size = 10

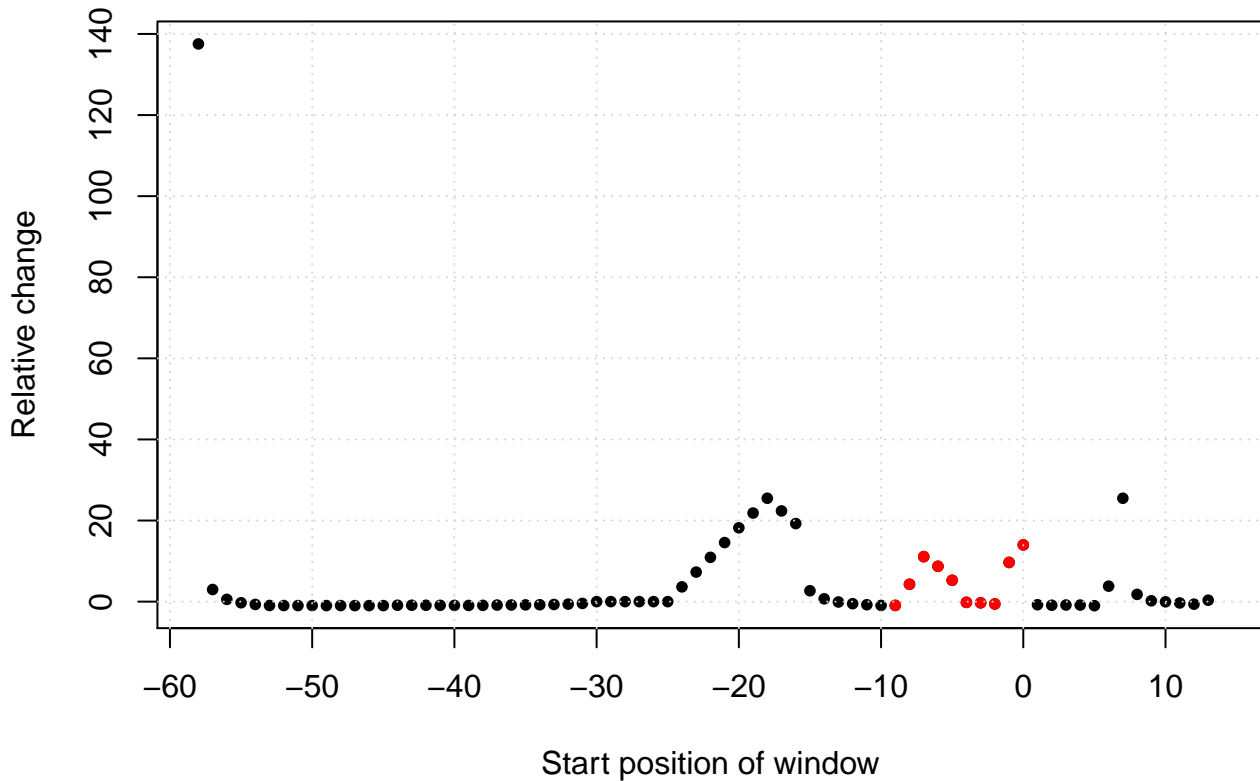

# P07A CellDensity\_In10e6\_Per\_ml Window Size = 10

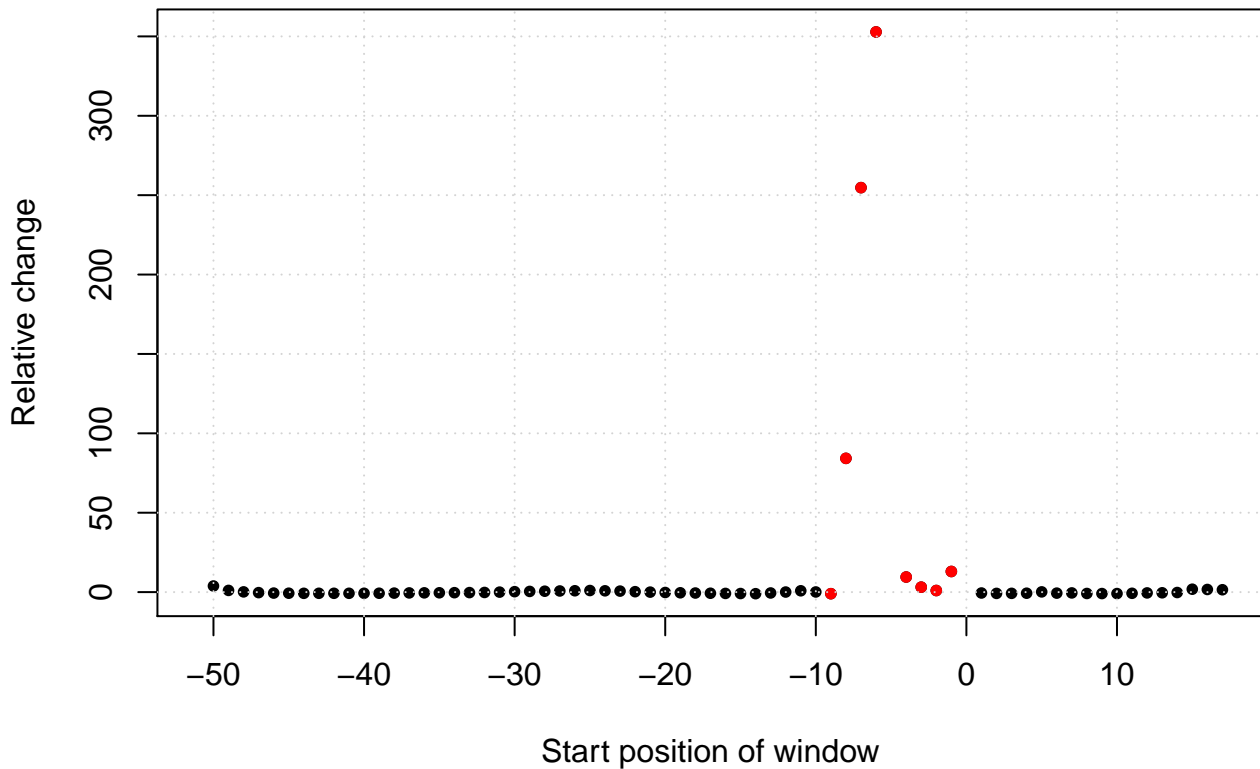

# P08A CellDensity\_In10e6\_Per\_ml Window Size = 10

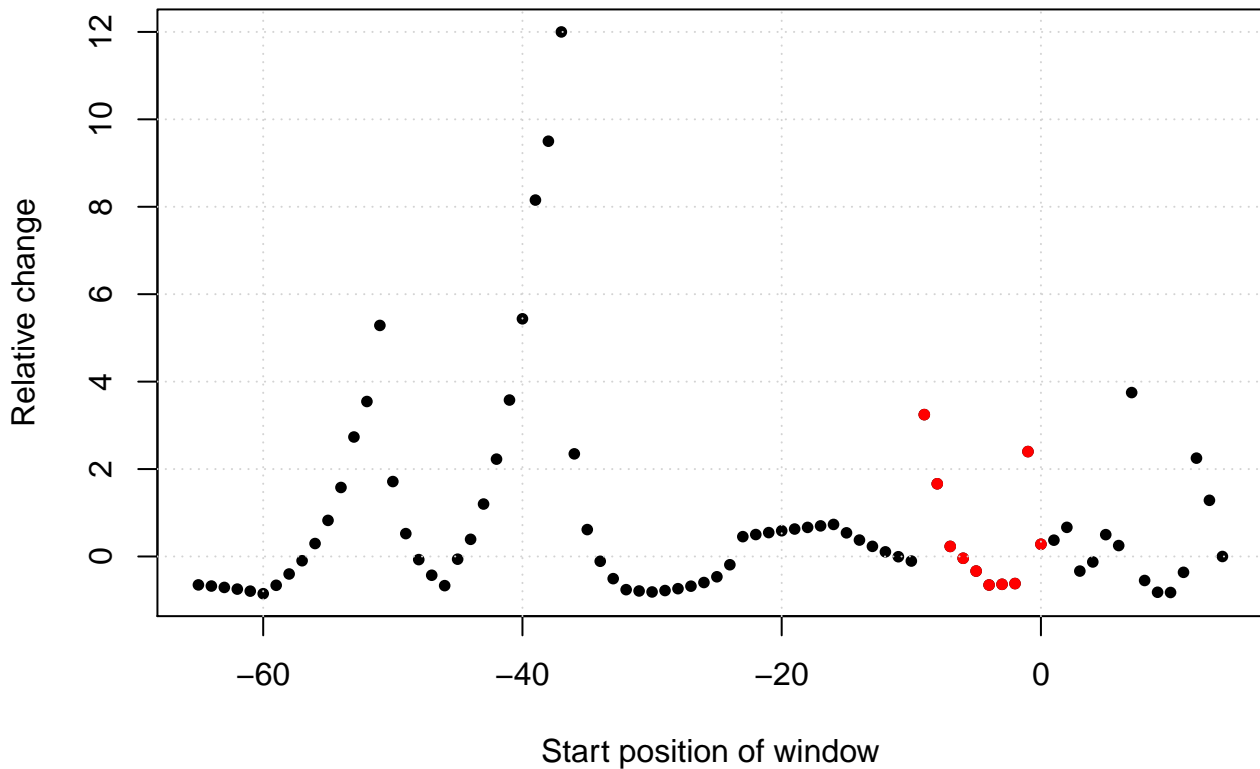

# P09A CellDensity\_In10e6\_Per\_ml Window Size = 10

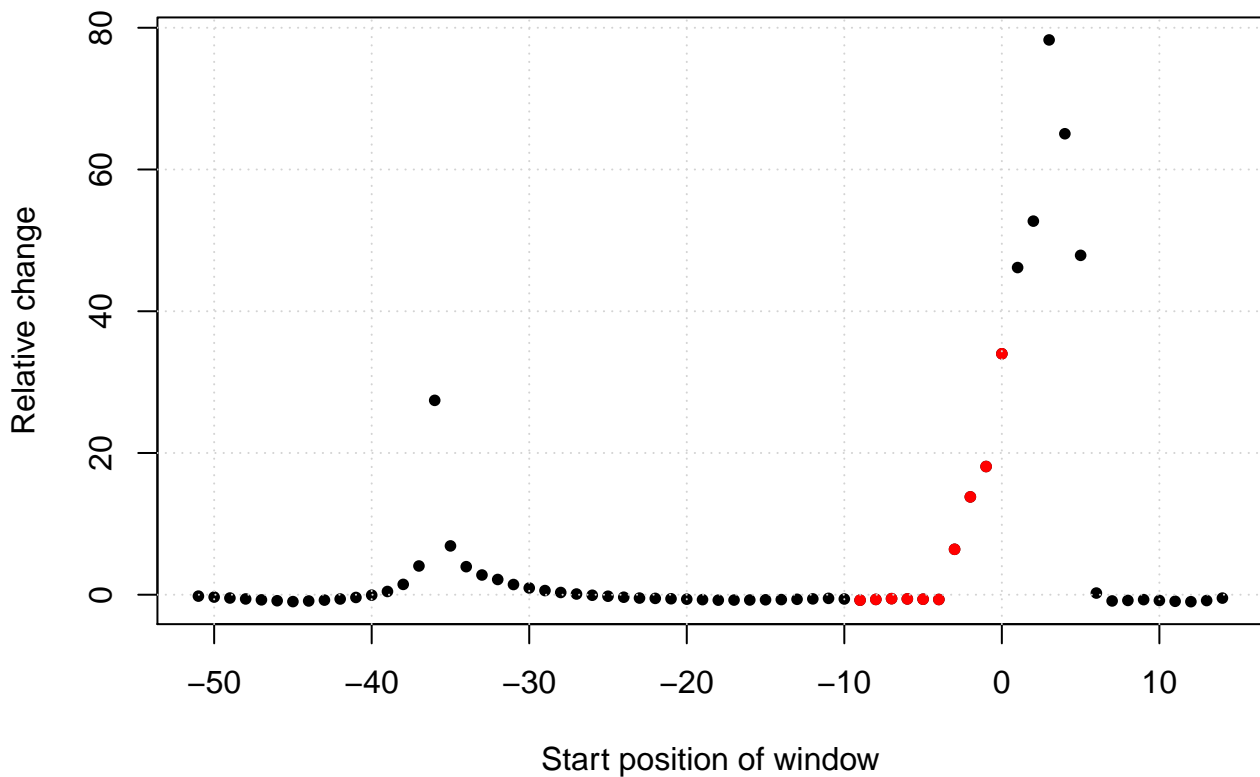

**P10A CellDensity\_In10e6\_Per\_ml Window Size = 10**

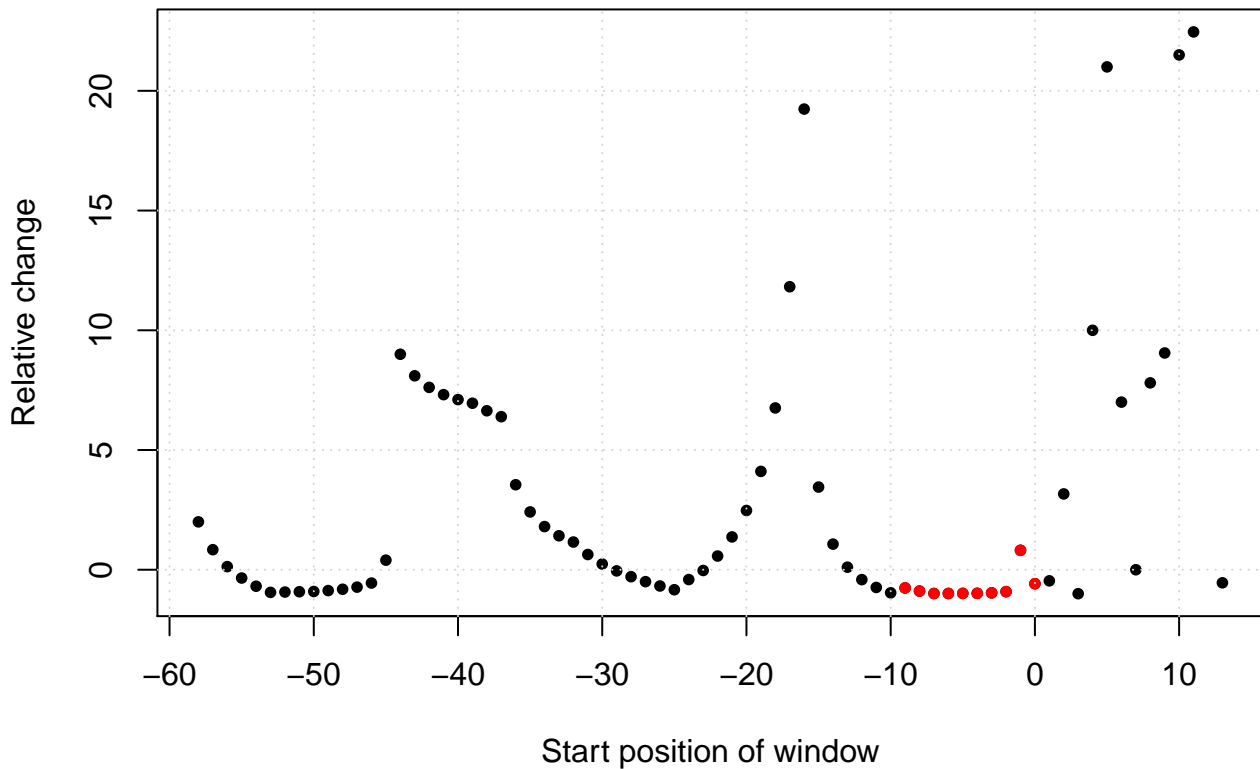

# P11A CellDensity\_In10e6\_Per\_ml Window Size = 10

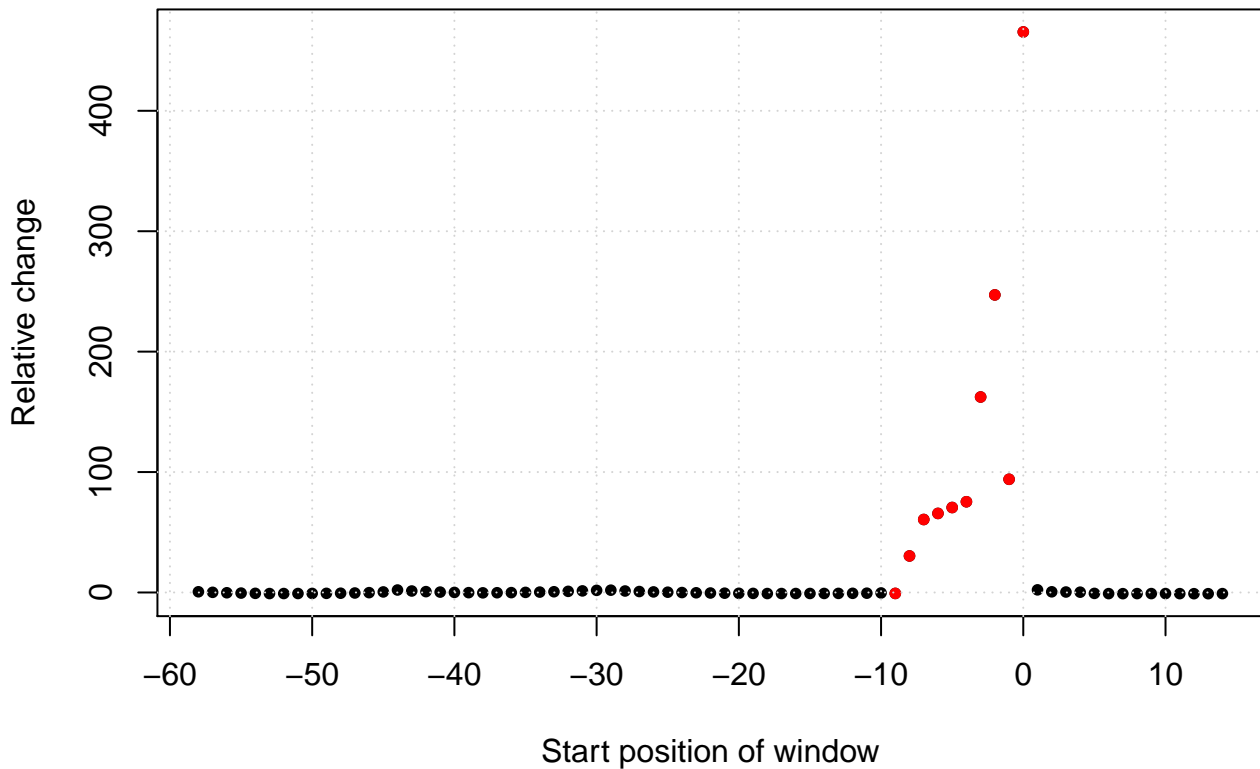

# P12A CellDensity\_In10e6\_Per\_ml Window Size = 10

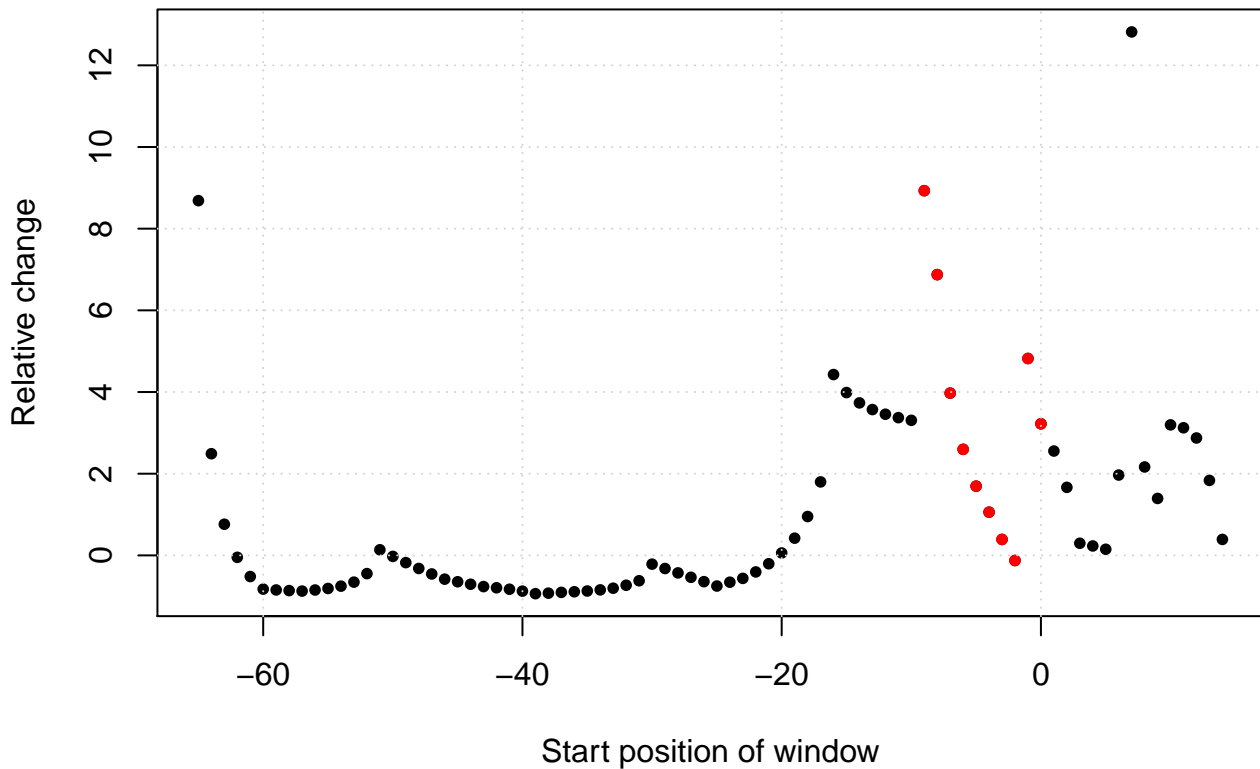



# P13A CellDensity\_In10e6\_Per\_ml Window Size = 10

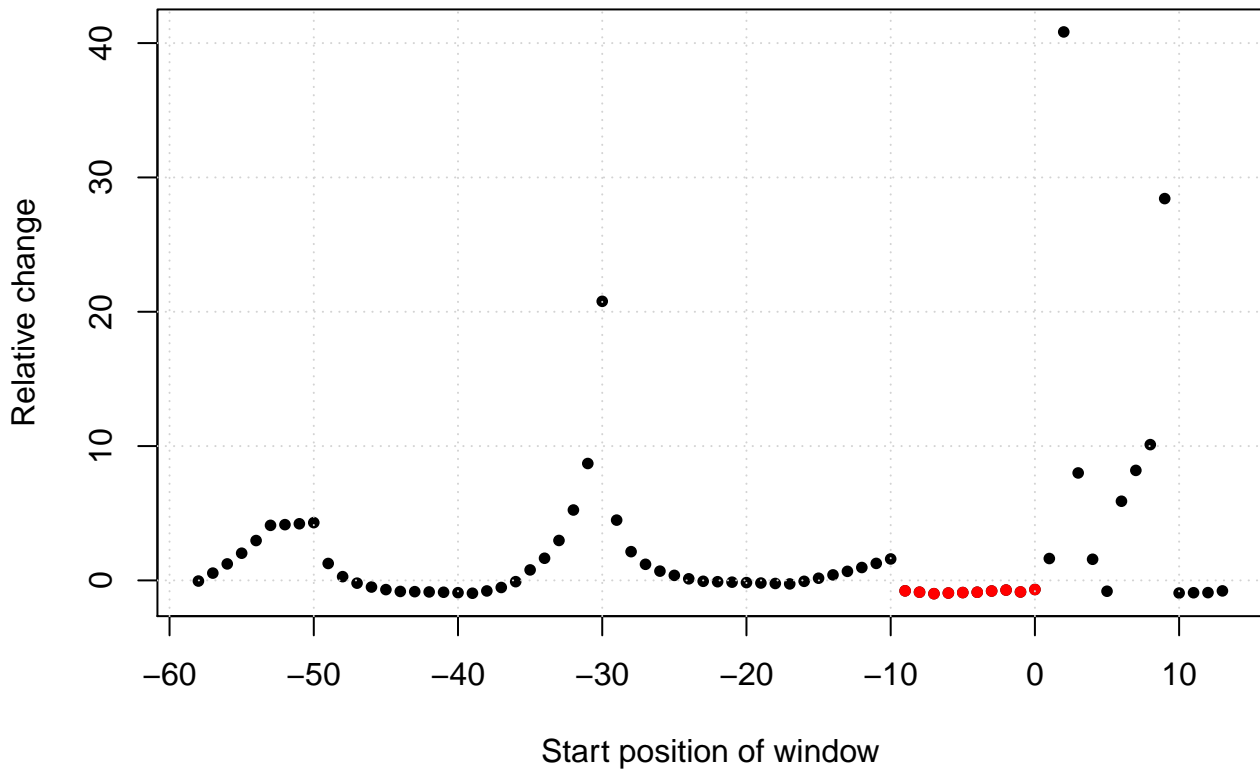

# P01H FeNO Window Size = 10

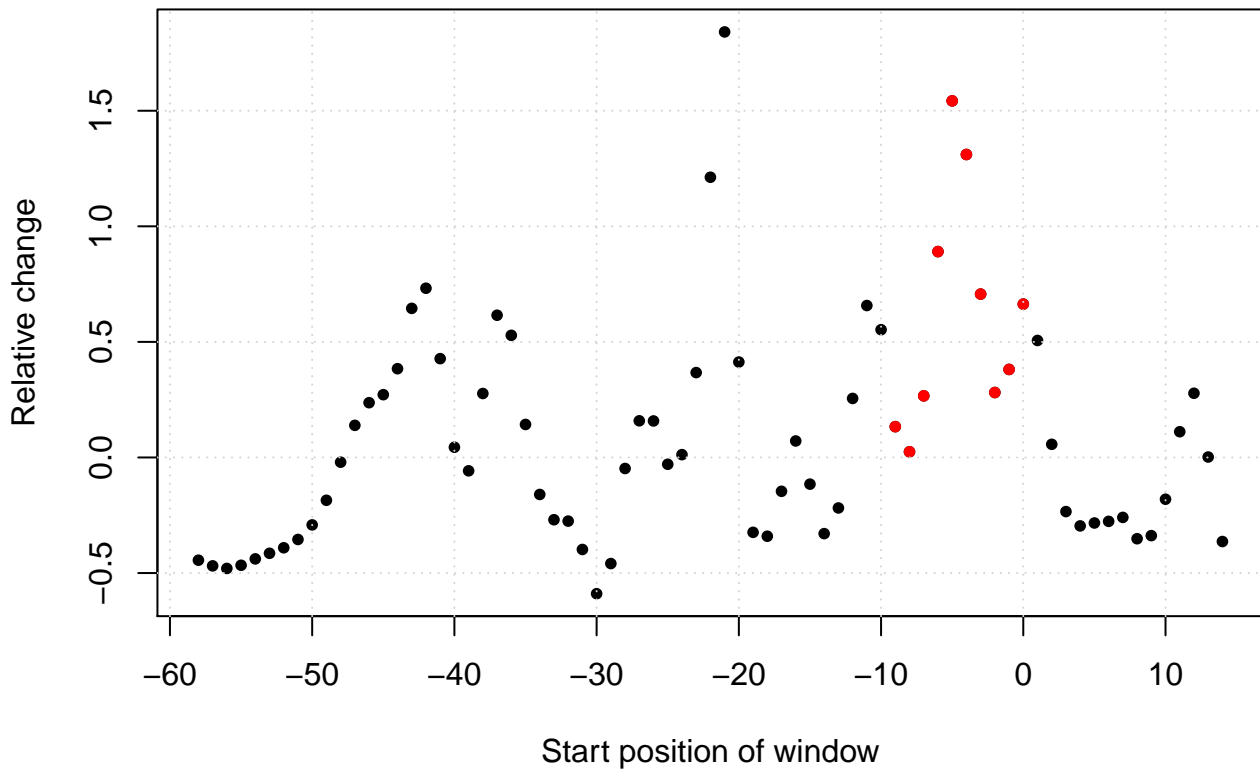

# P03H FeNO Window Size = 10

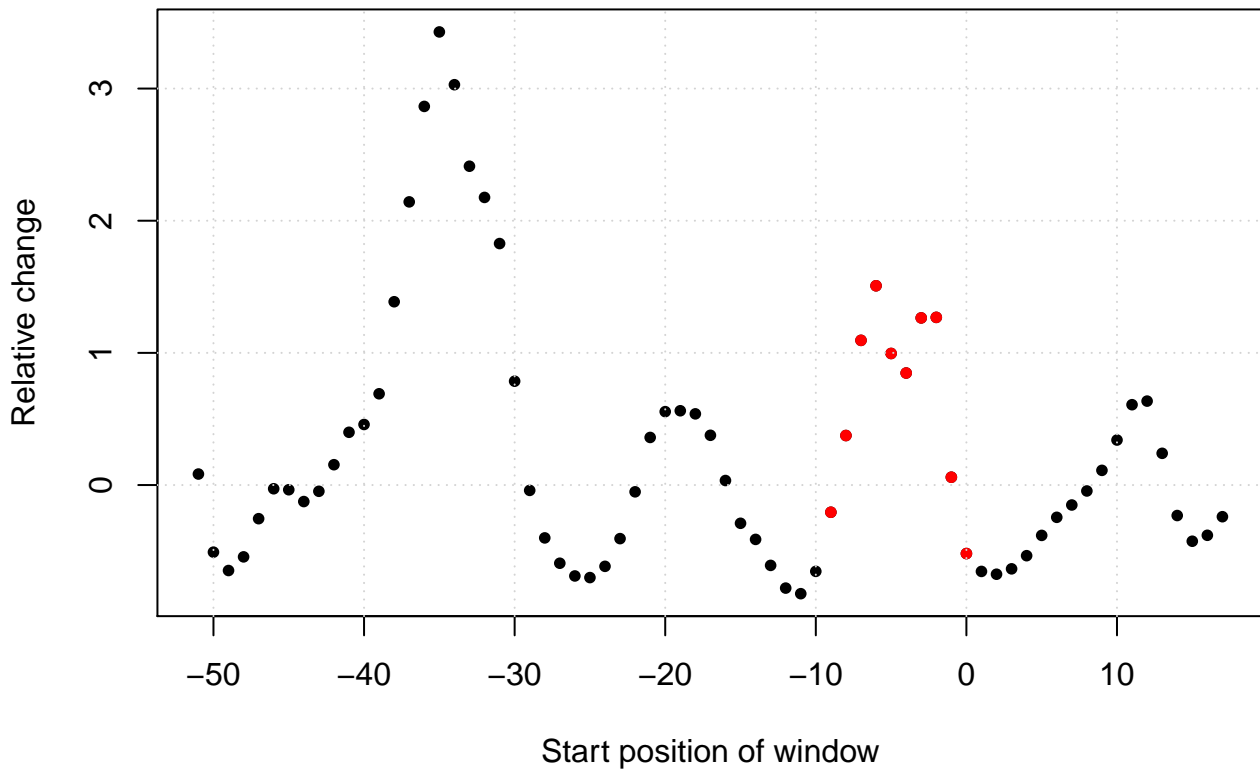

# P05H FeNO Window Size = 10

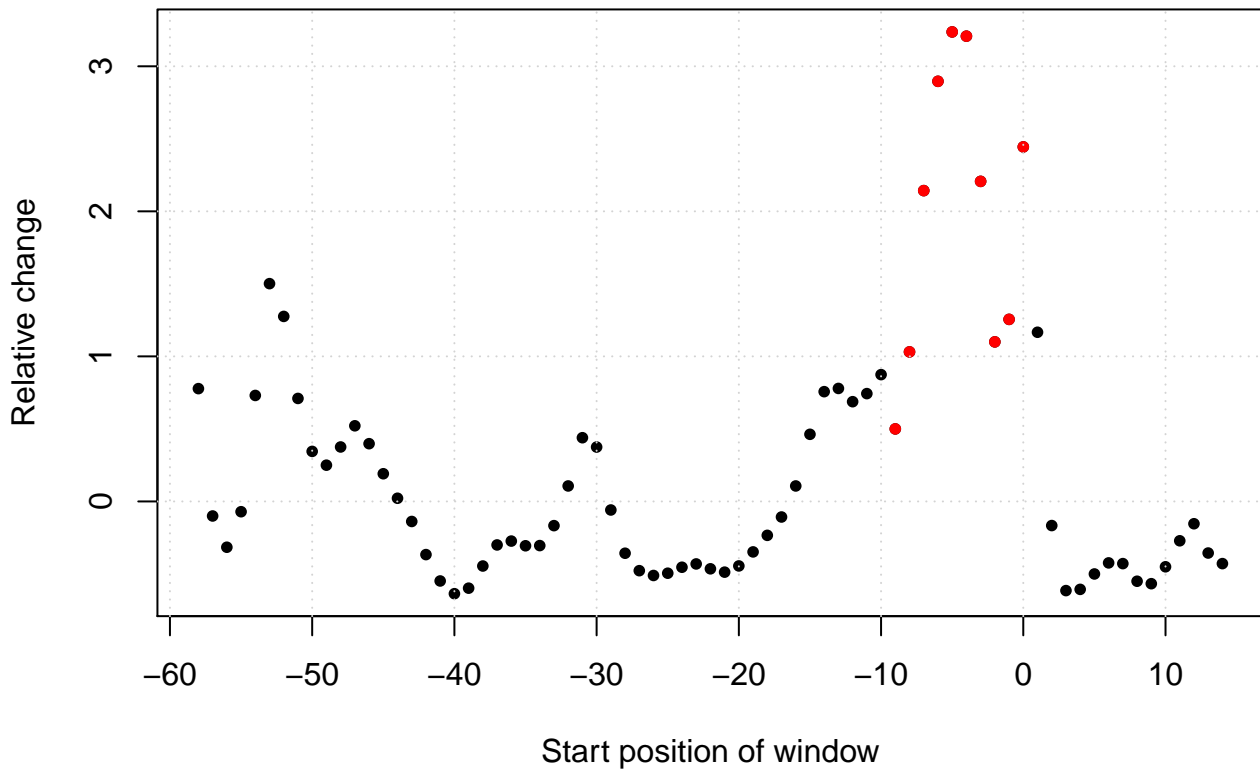

# P06H FeNO Window Size = 10

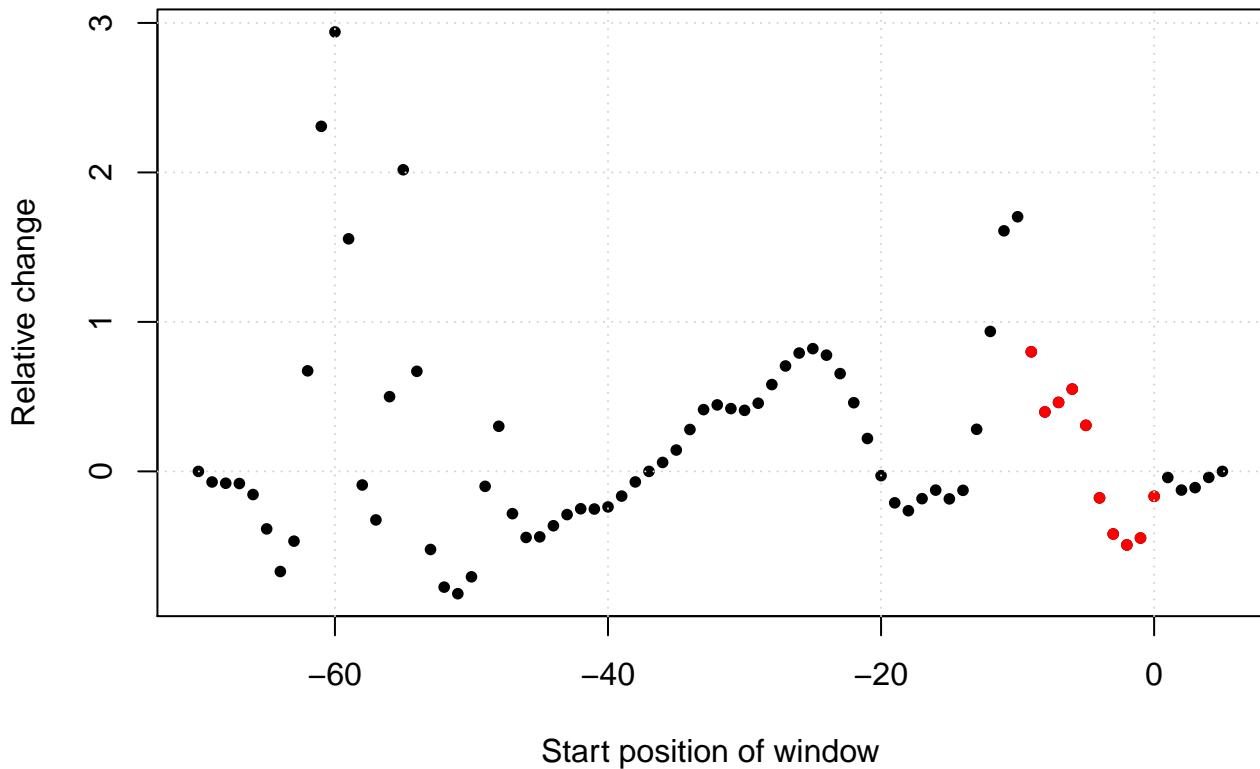

# P07H FeNO Window Size = 10

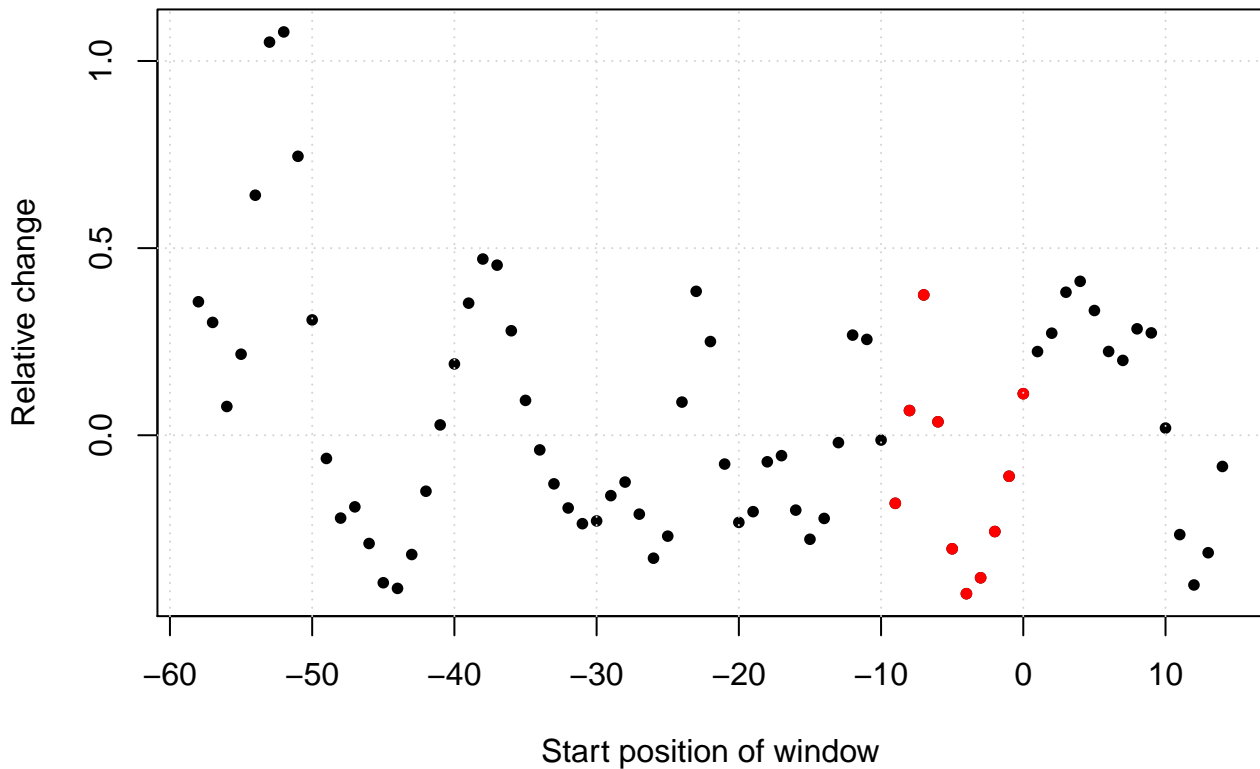

# P08H FeNO Window Size = 10

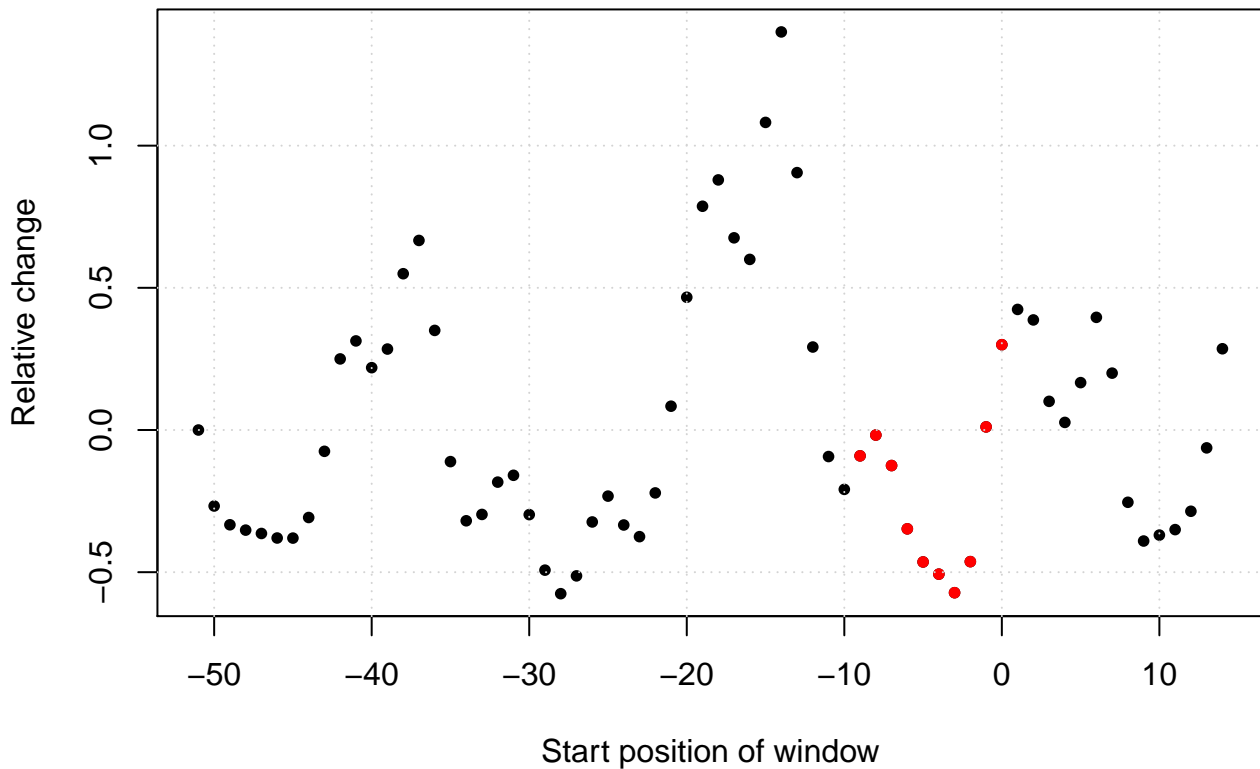

# P09H FeNO Window Size = 10

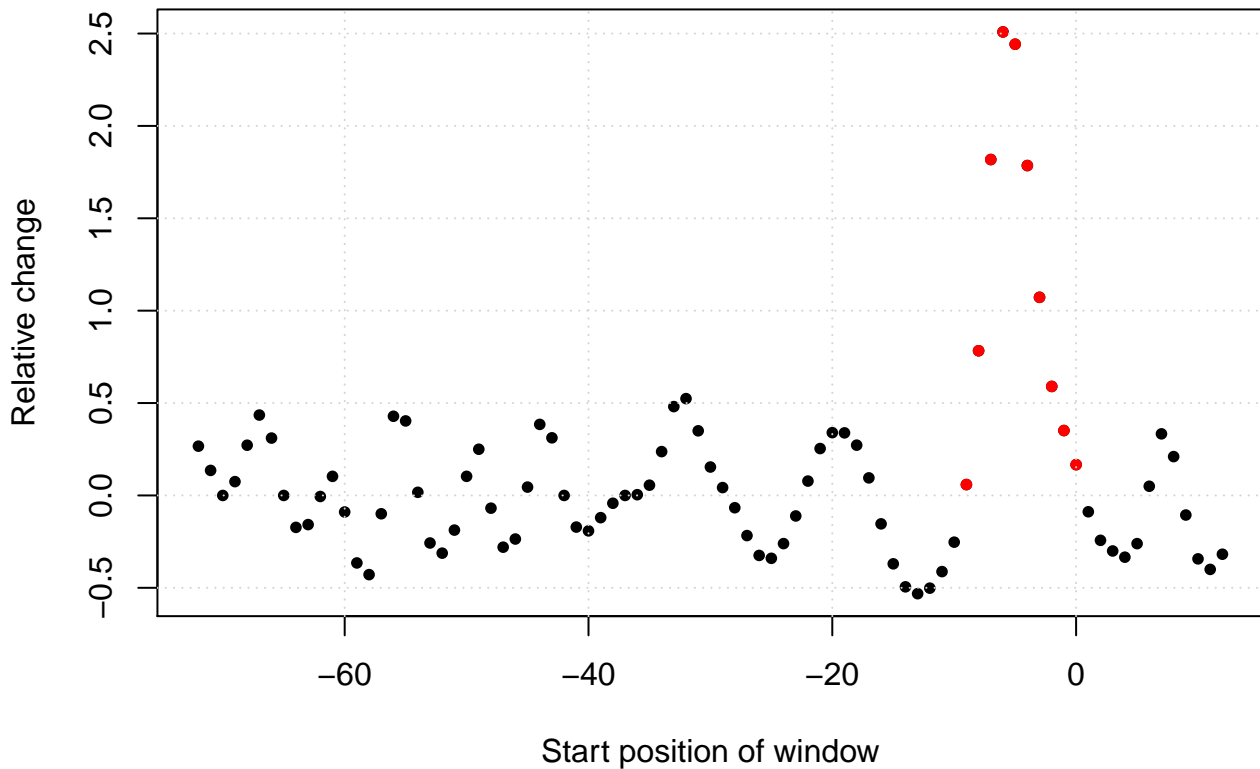



# P11H FeNO Window Size = 10

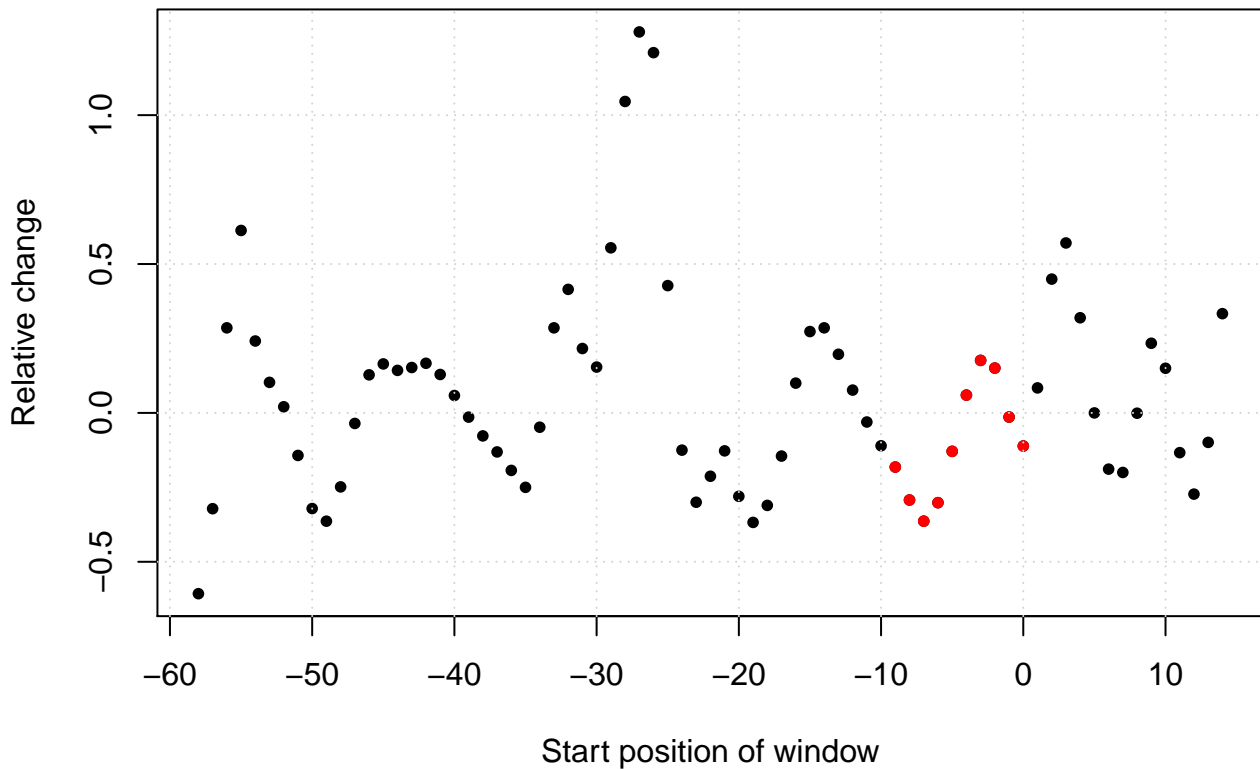

# P12H FeNO Window Size = 10

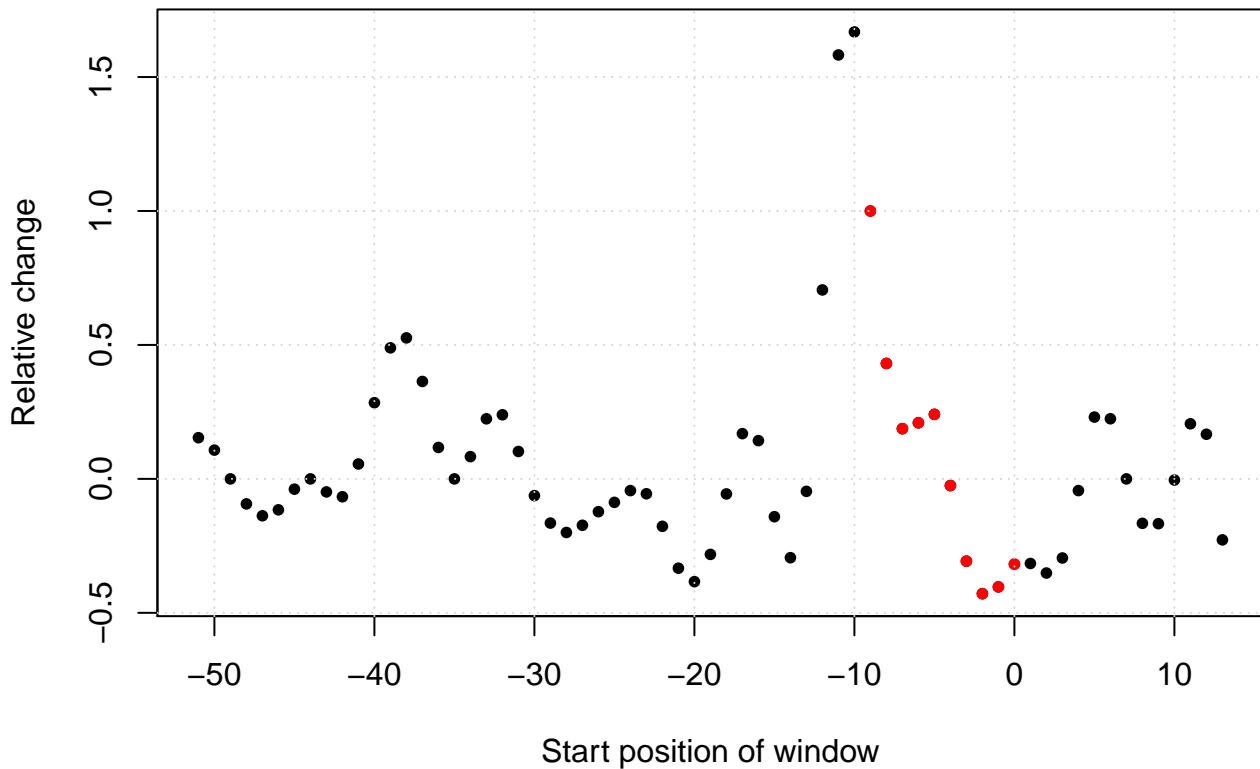

# P13H FeNO Window Size = 10

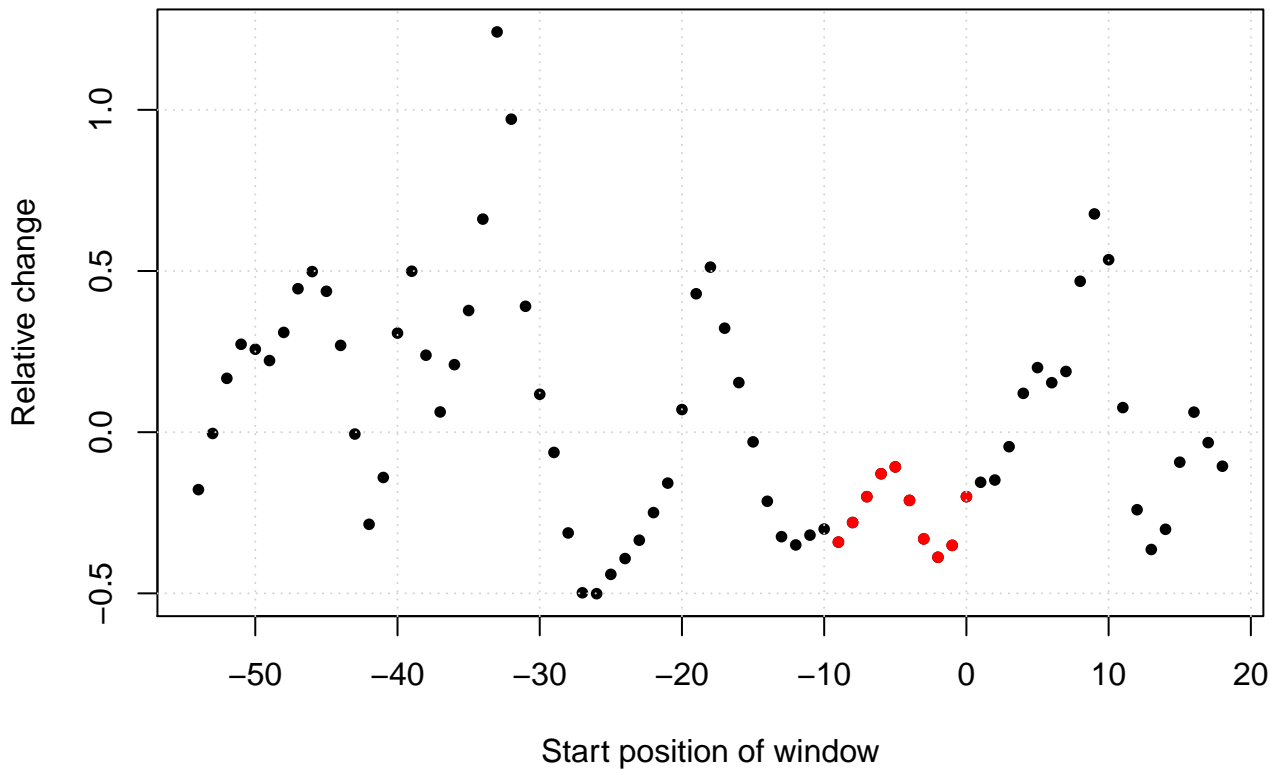

# P14H FeNO Window Size = 10

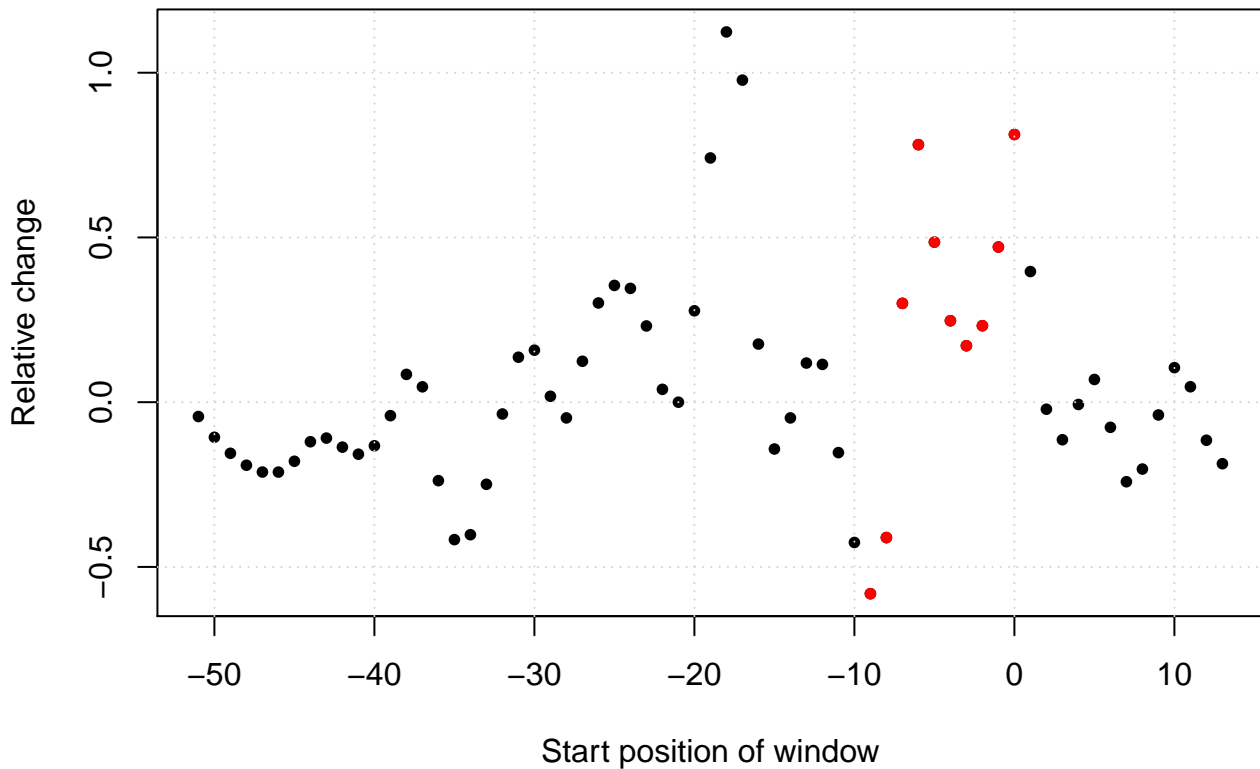

# P15H FeNO Window Size = 10

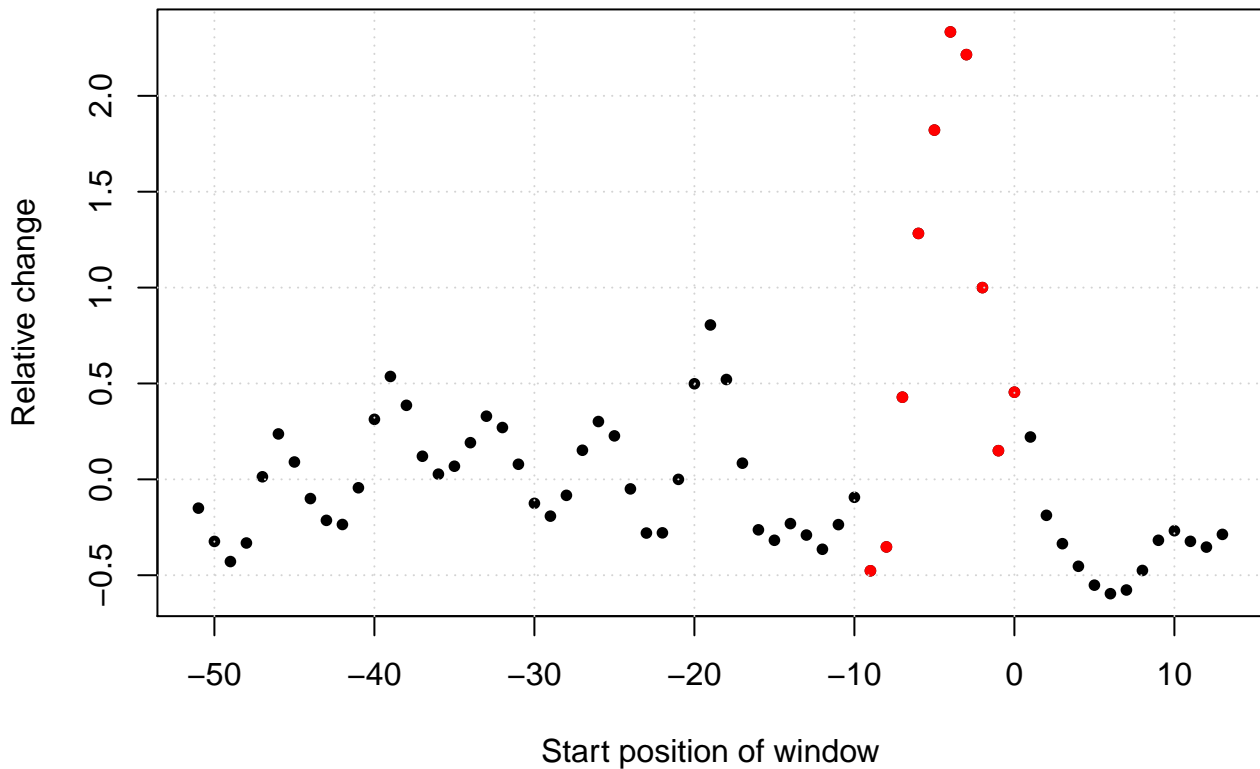

# P01A FeNO Window Size = 10

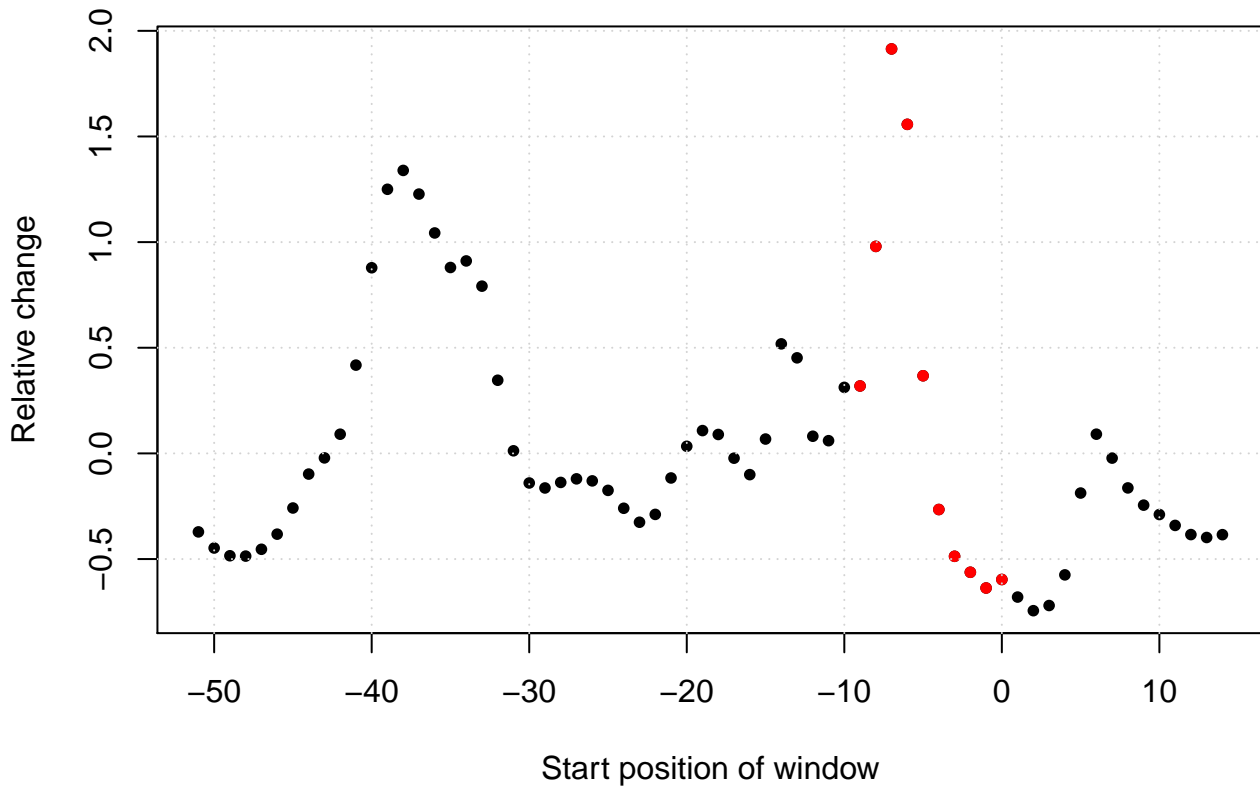

## P02A FeNO Window Size = 10

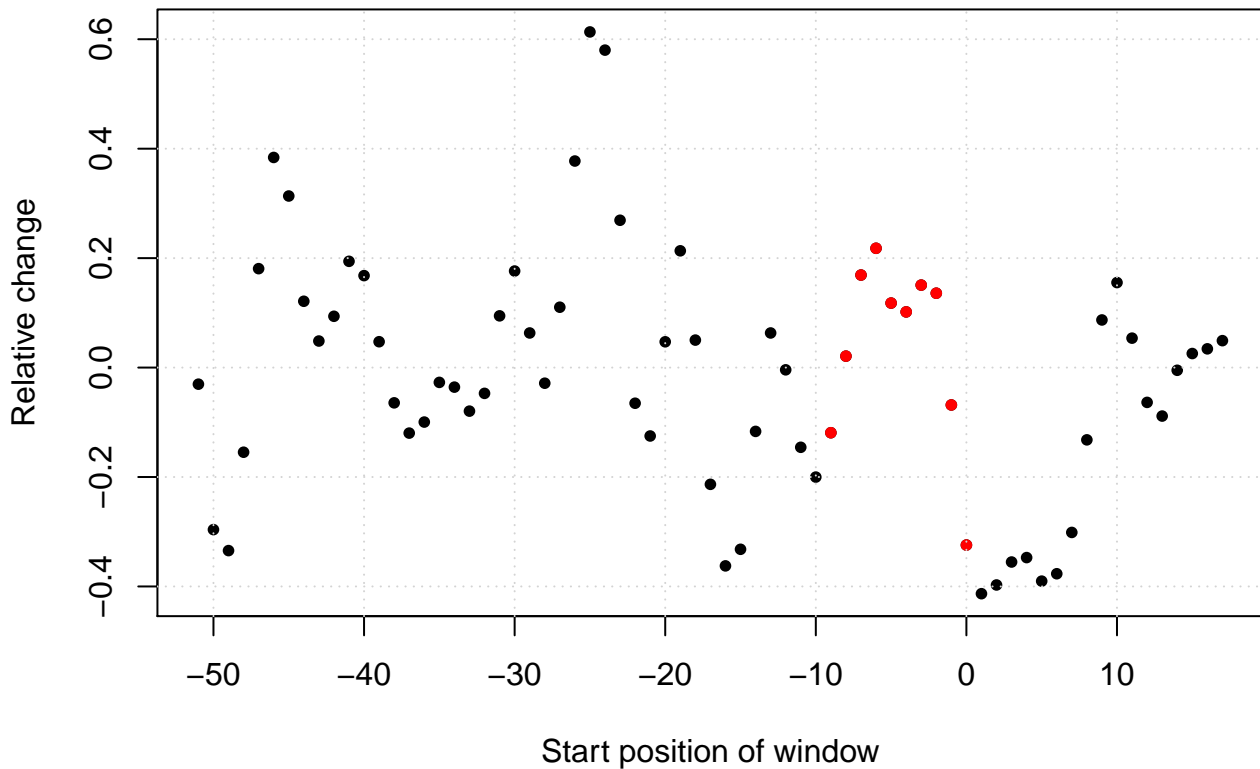

# P04A FeNO Window Size = 10

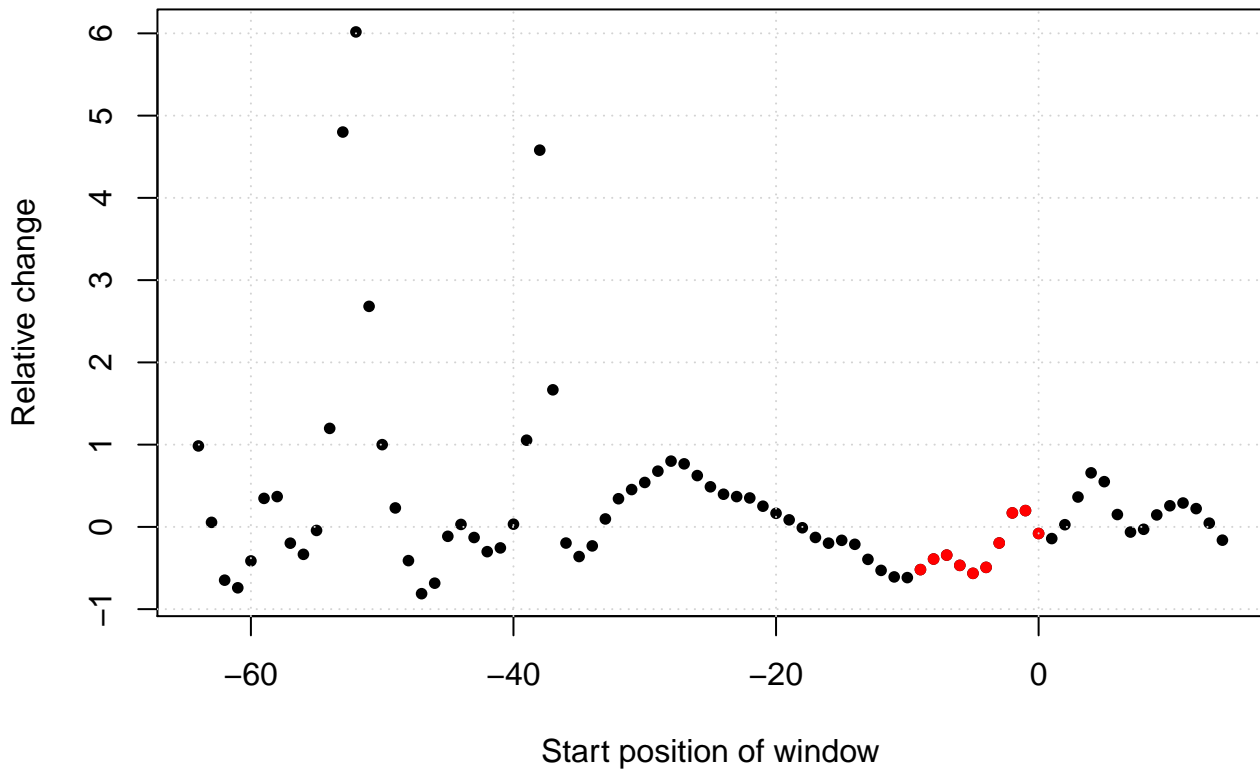



# P05A FeNO Window Size = 10

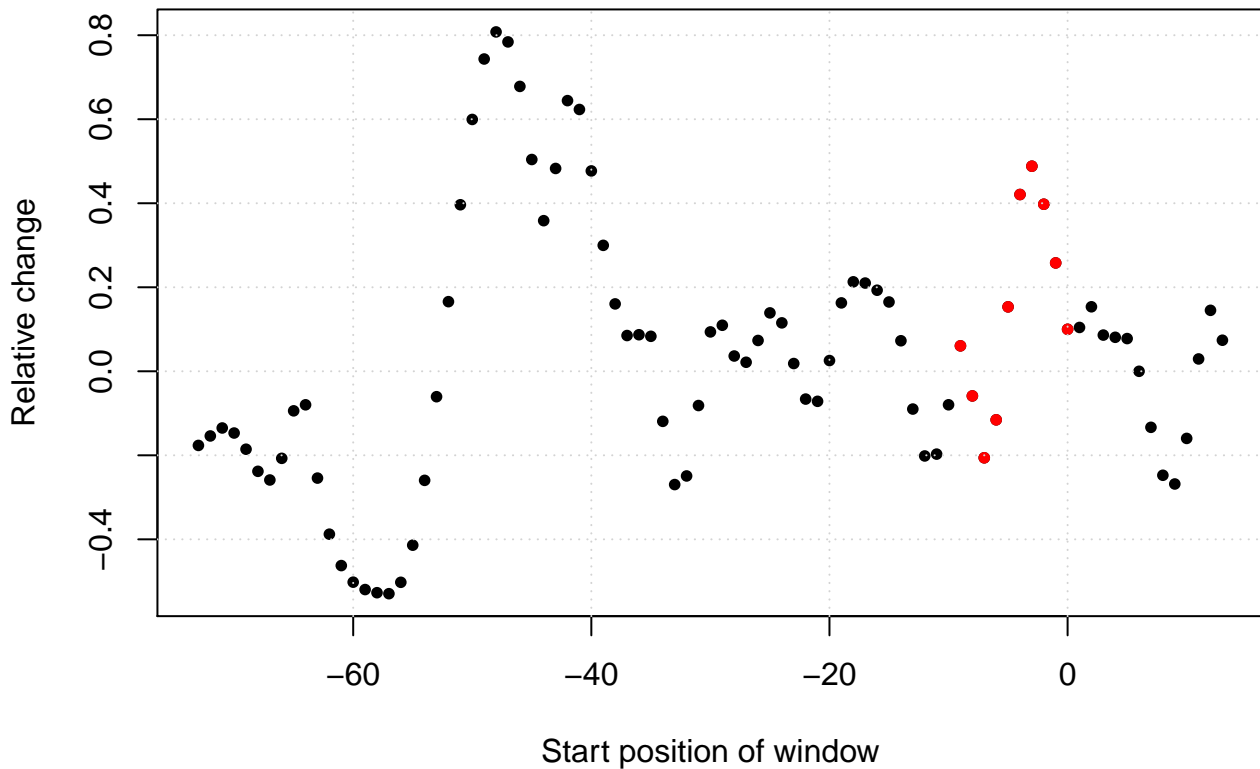

# P06A FeNO Window Size = 10

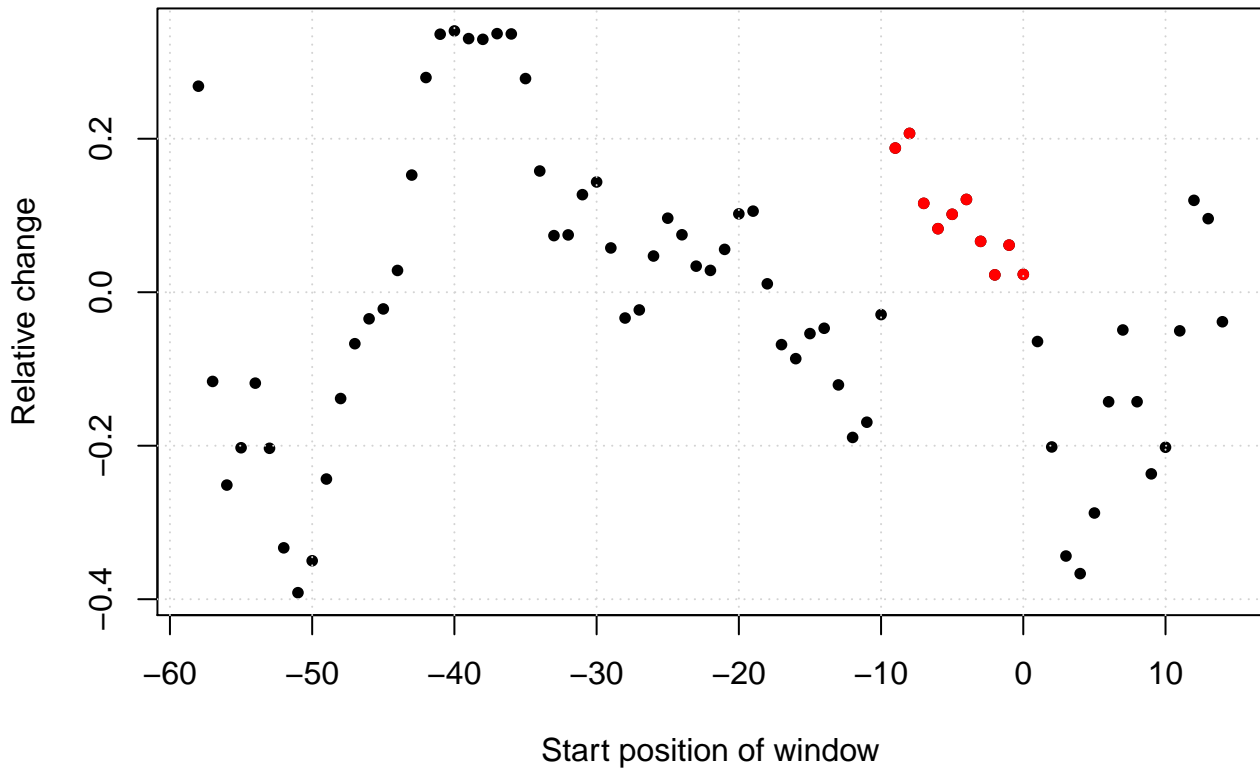

# P07A FeNO Window Size = 10

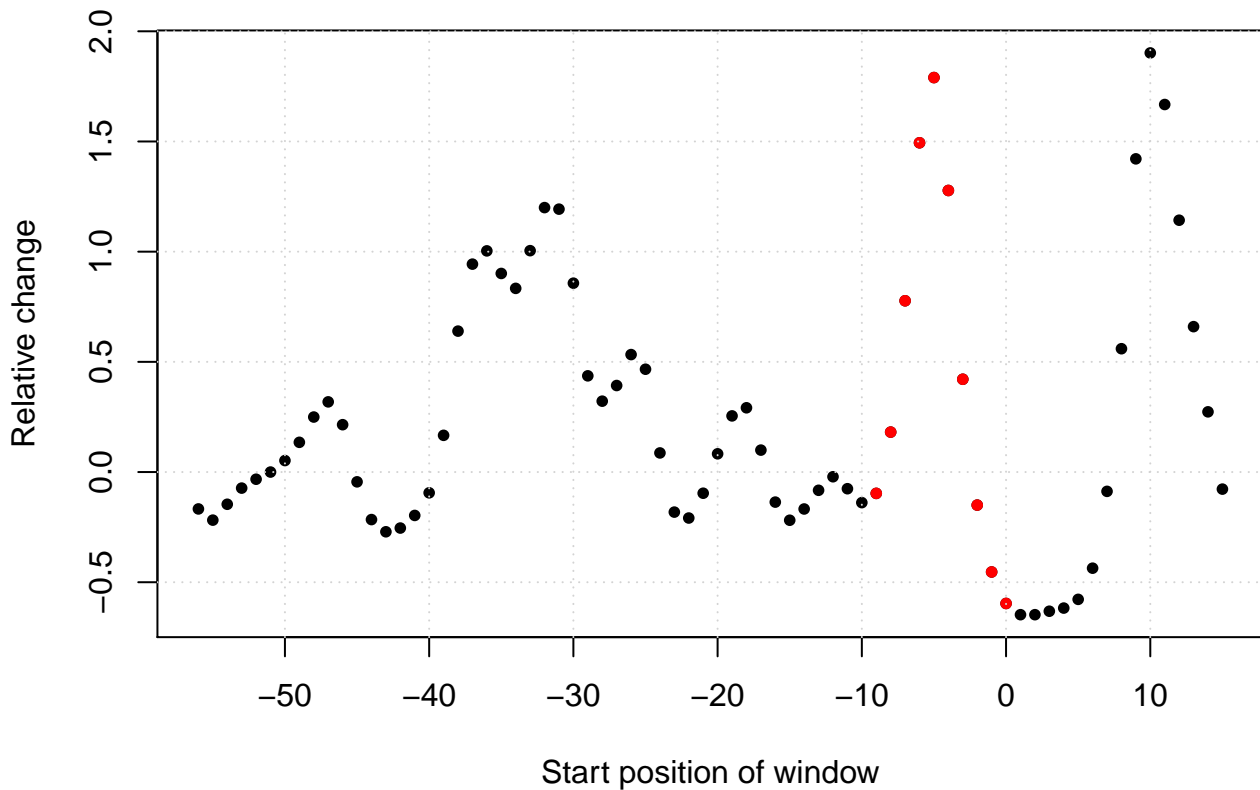

# P08A FeNO Window Size = 10

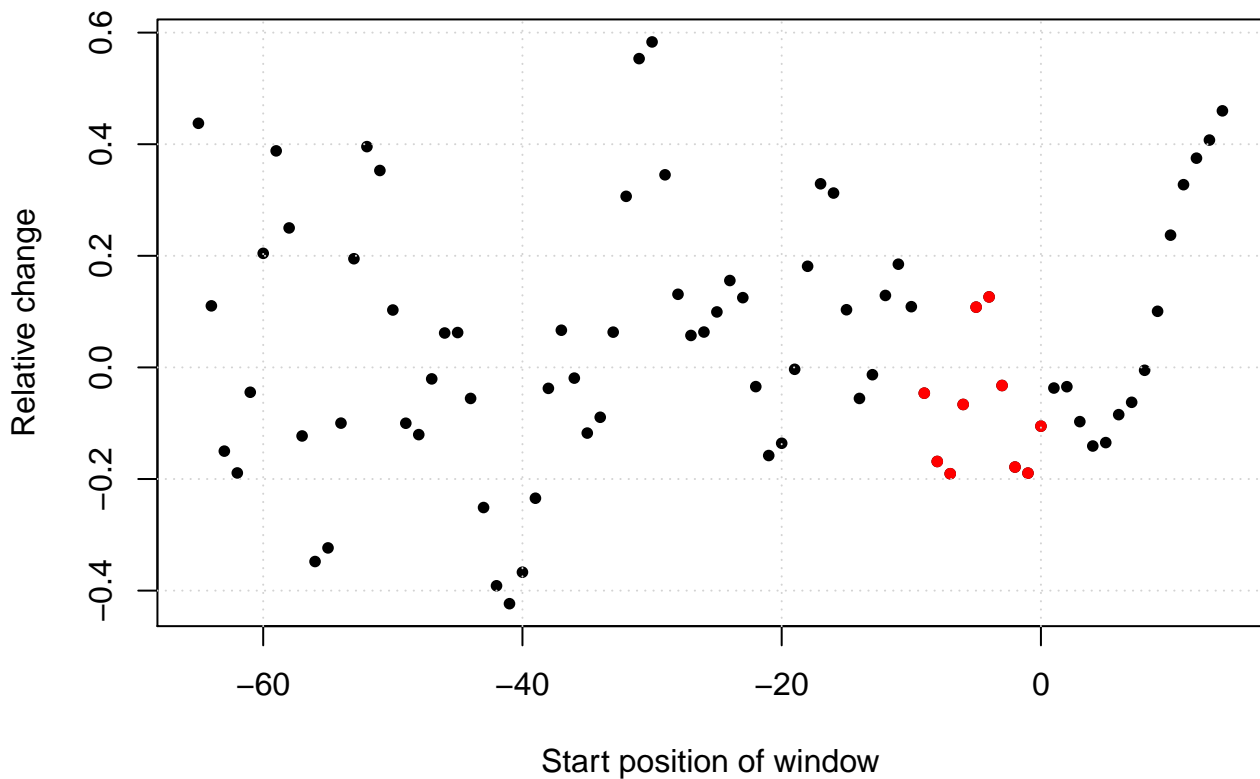

# P09A FeNO Window Size = 10

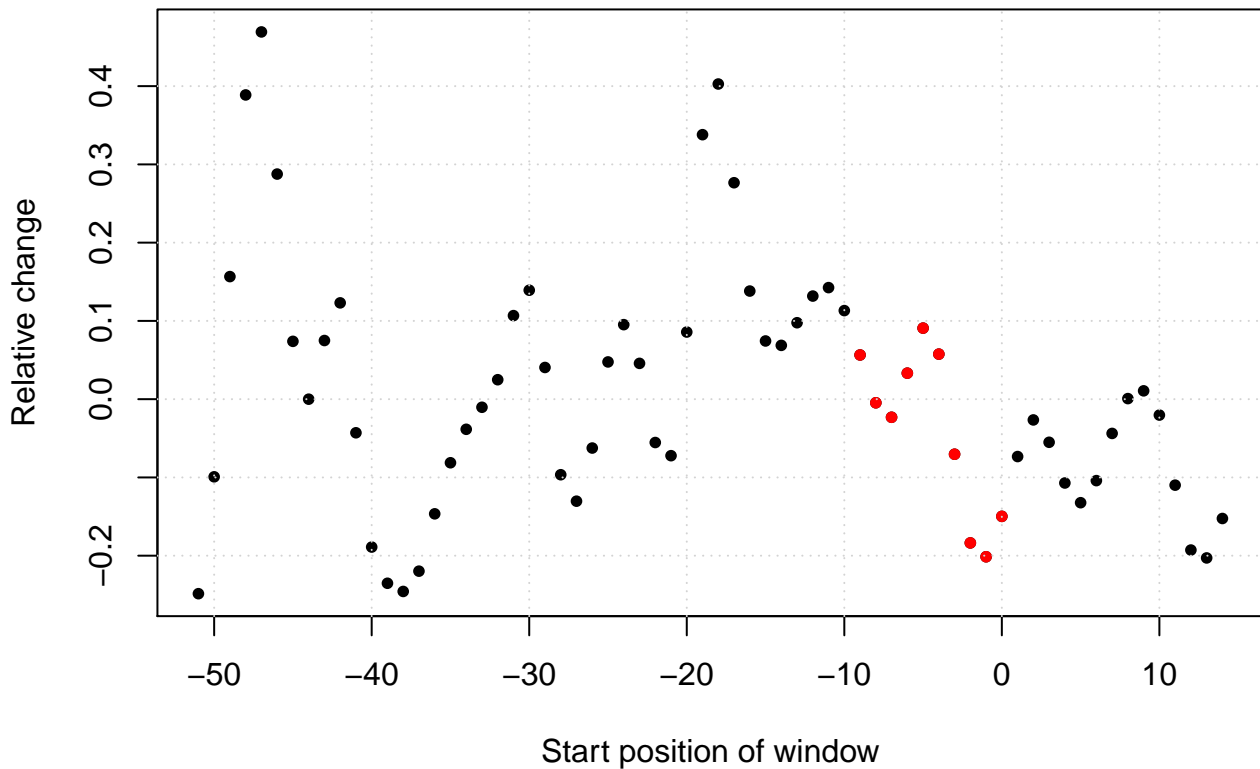

## P10A FeNO Window Size = 10

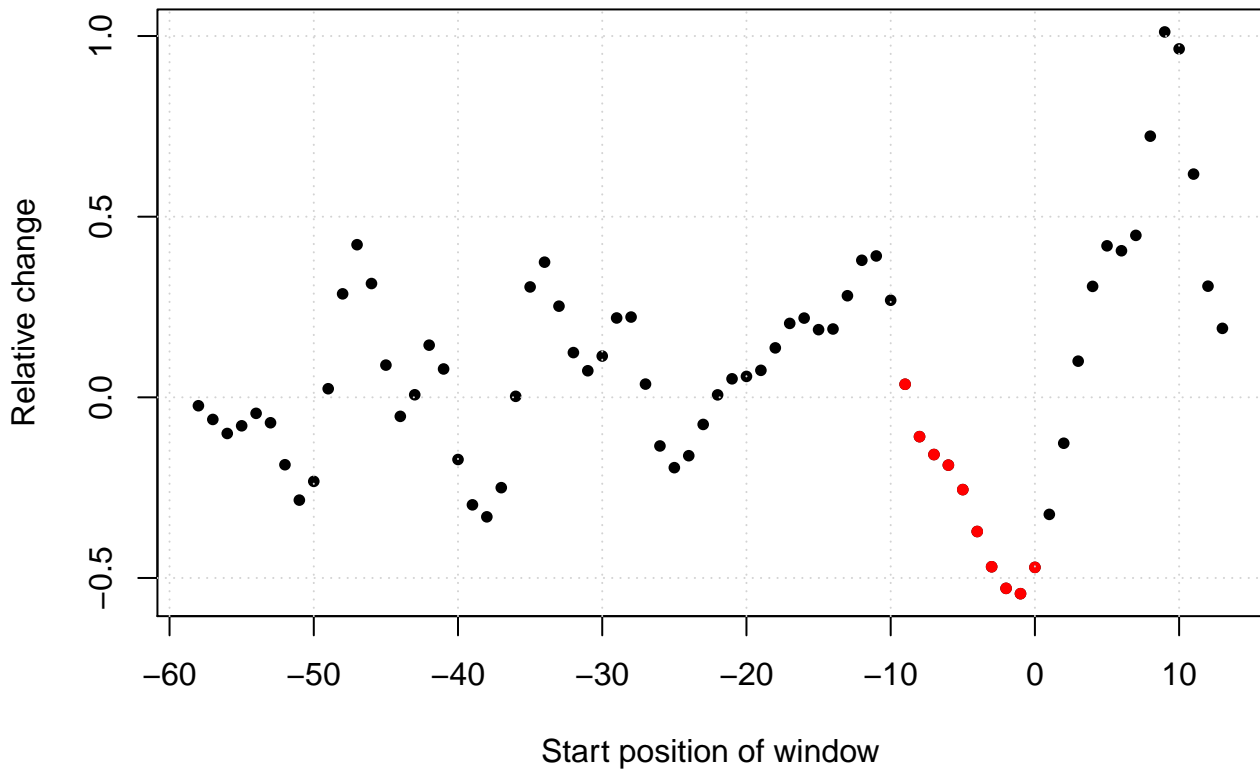

# P11A FeNO Window Size = 10

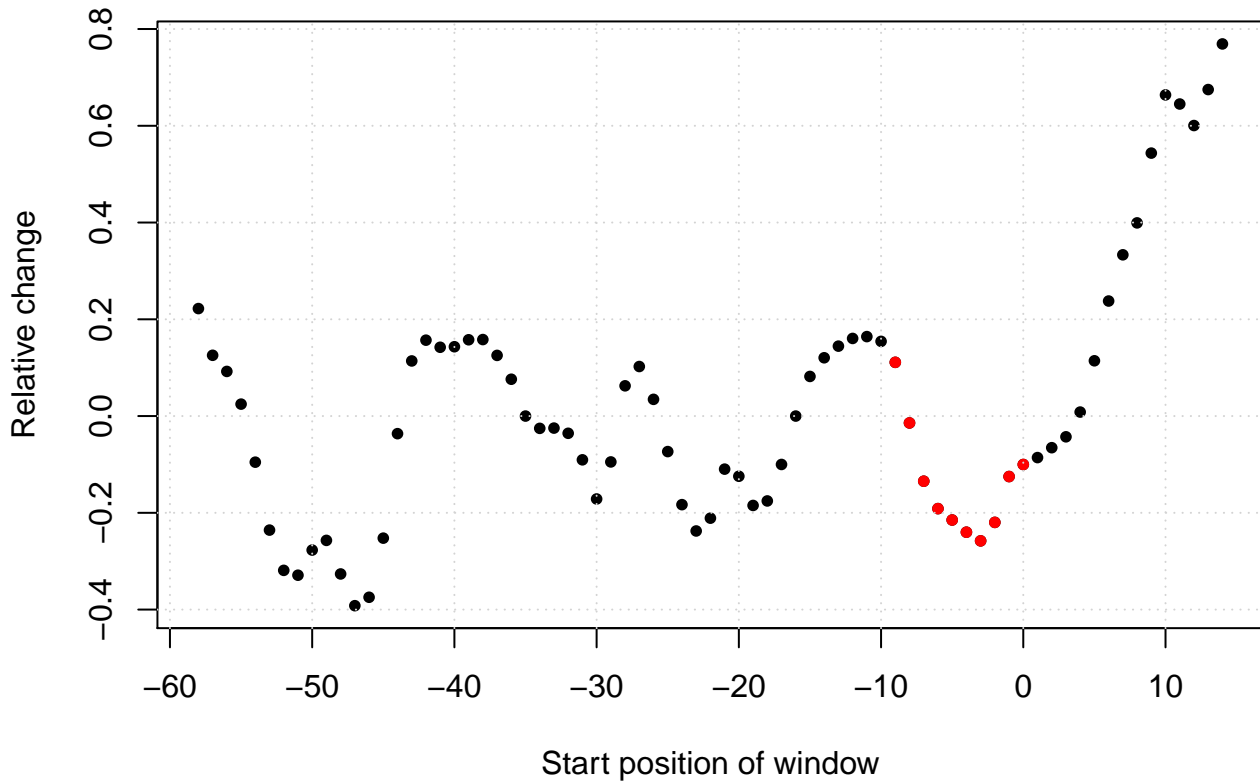

## P12A FeNO Window Size = 10

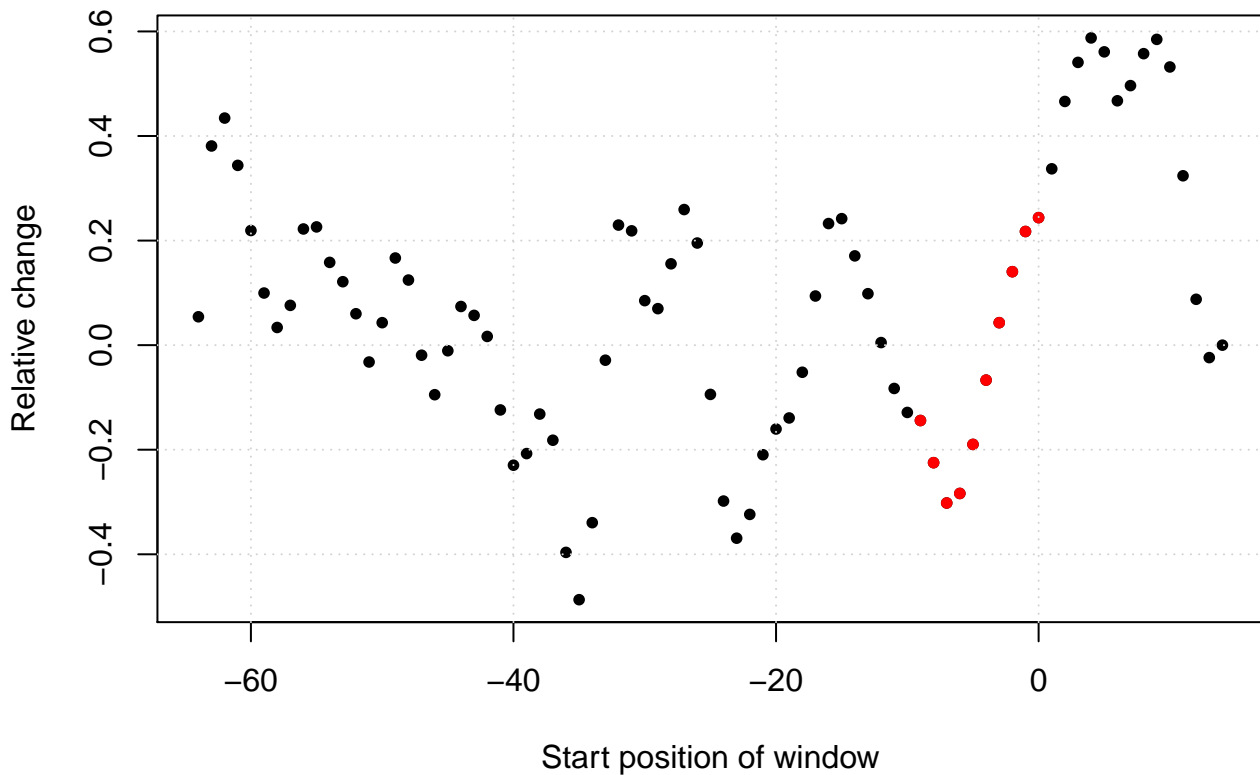



# P13A FeNO Window Size = 10

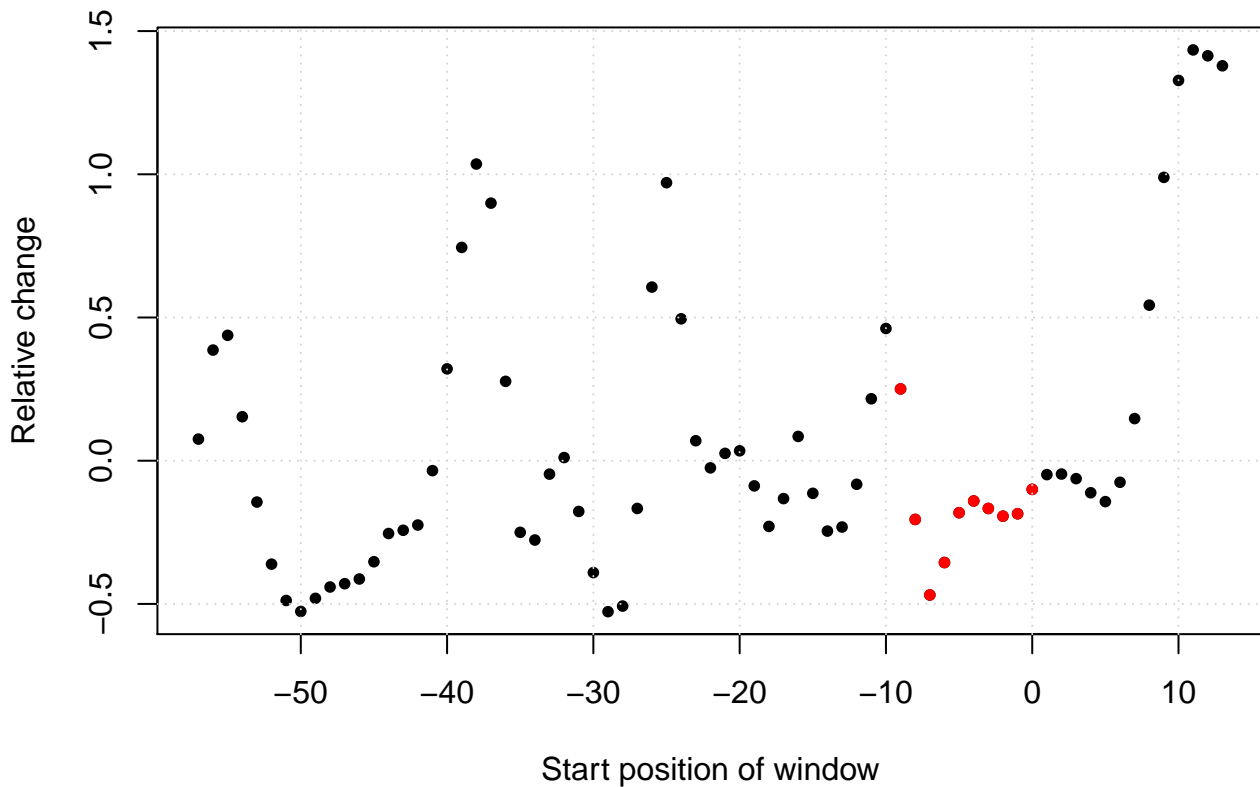

# P01H NFEV1 Window Size = 10

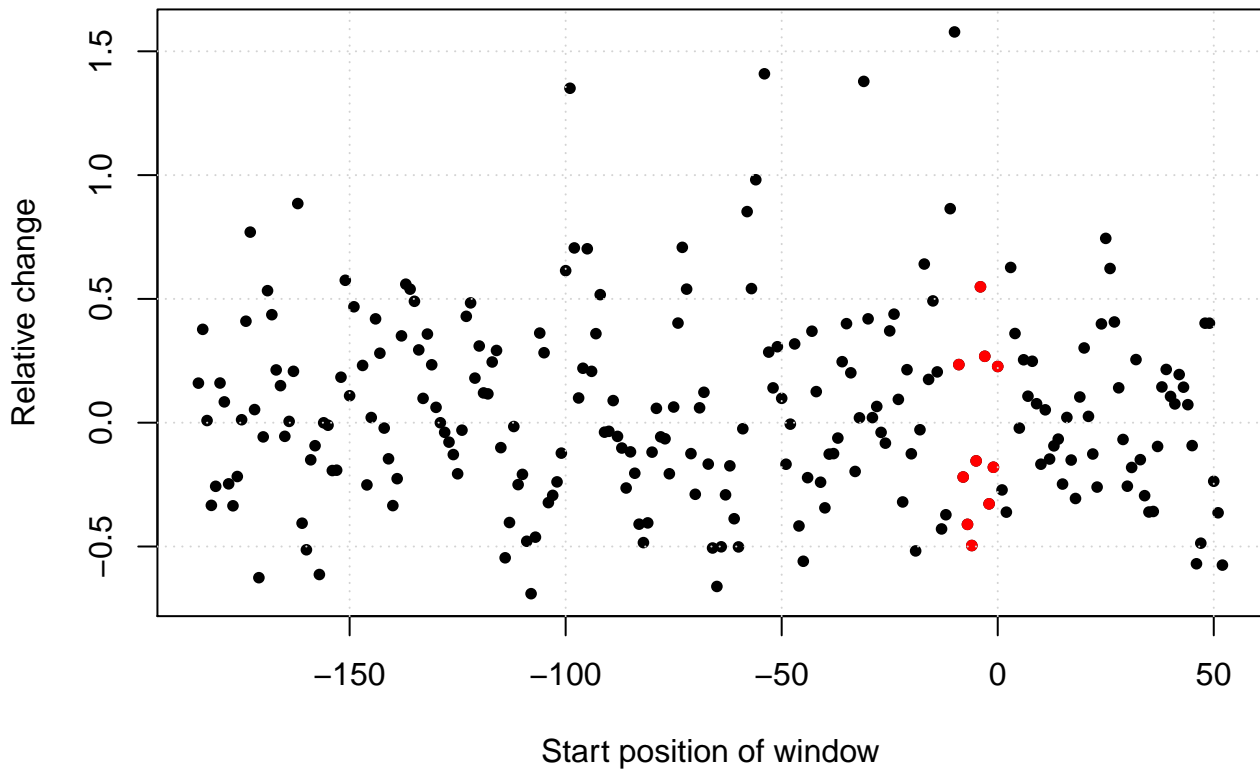

# P03H NFEV1 Window Size = 10

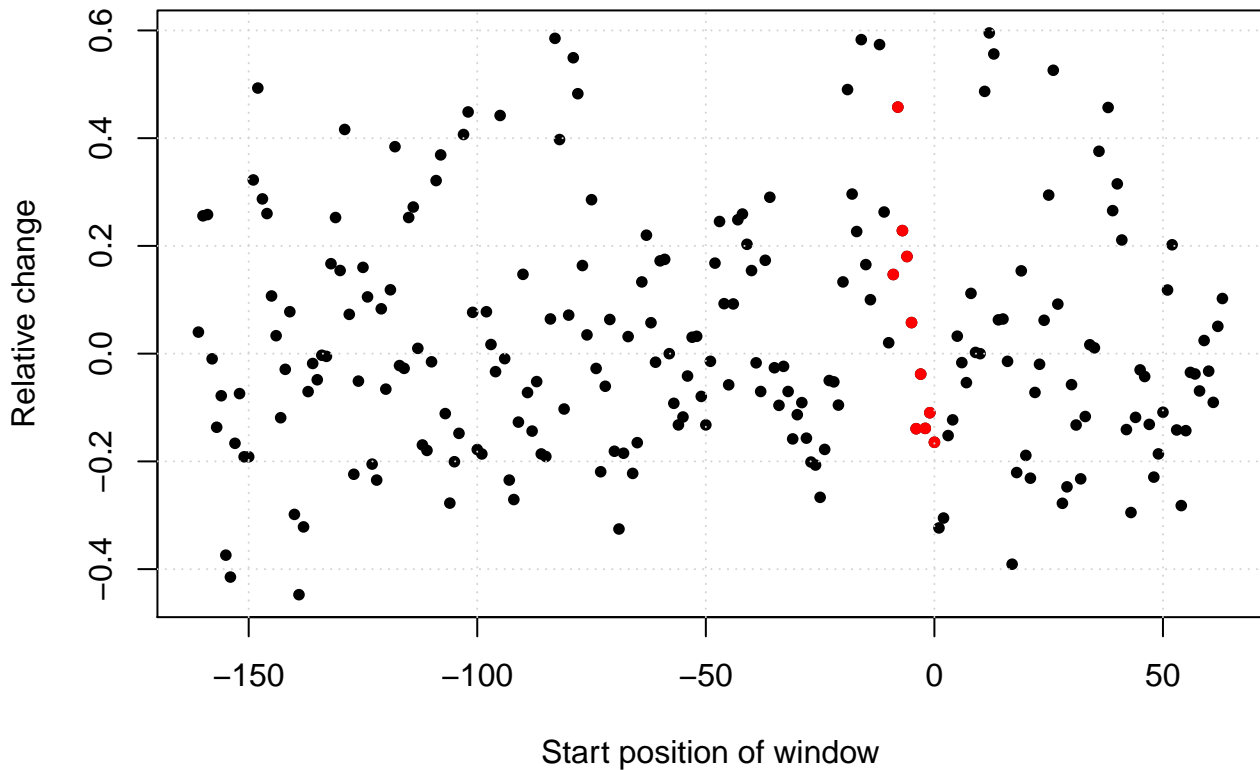

# P05H NFEV1 Window Size = 10

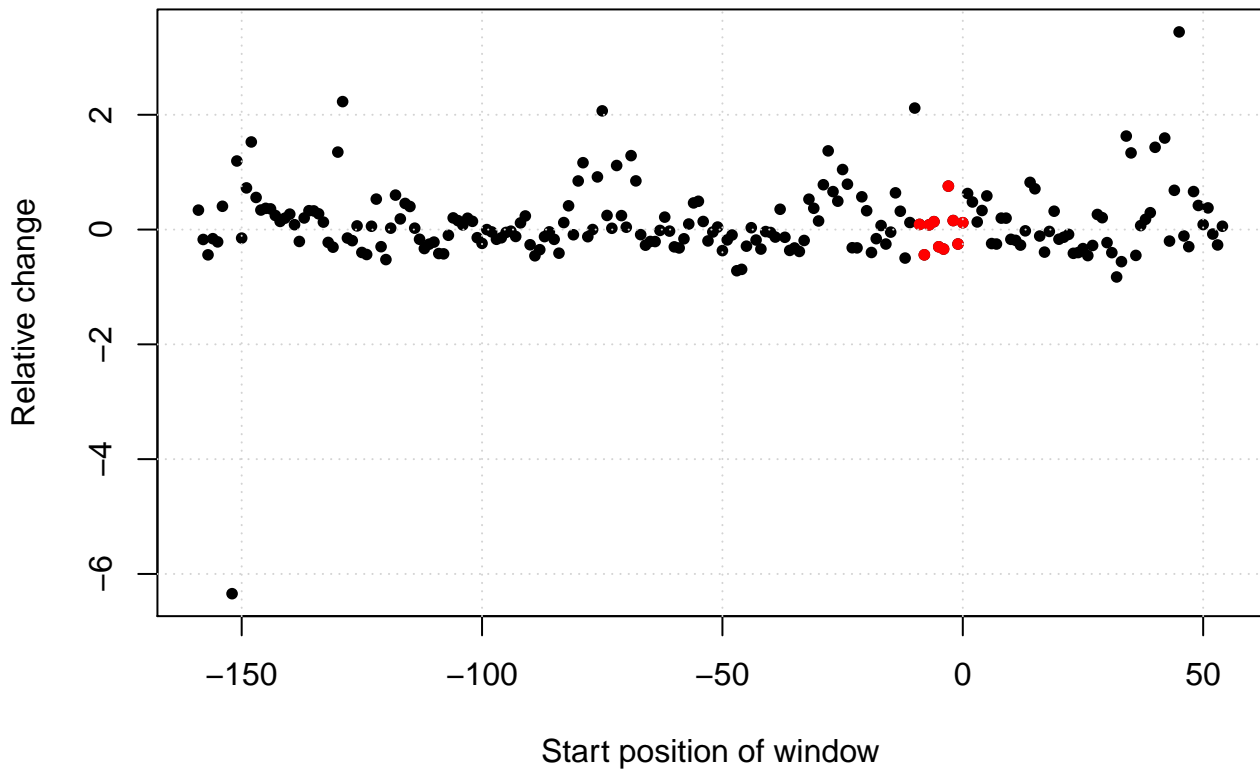

## P06H NFEV1 Window Size = 10

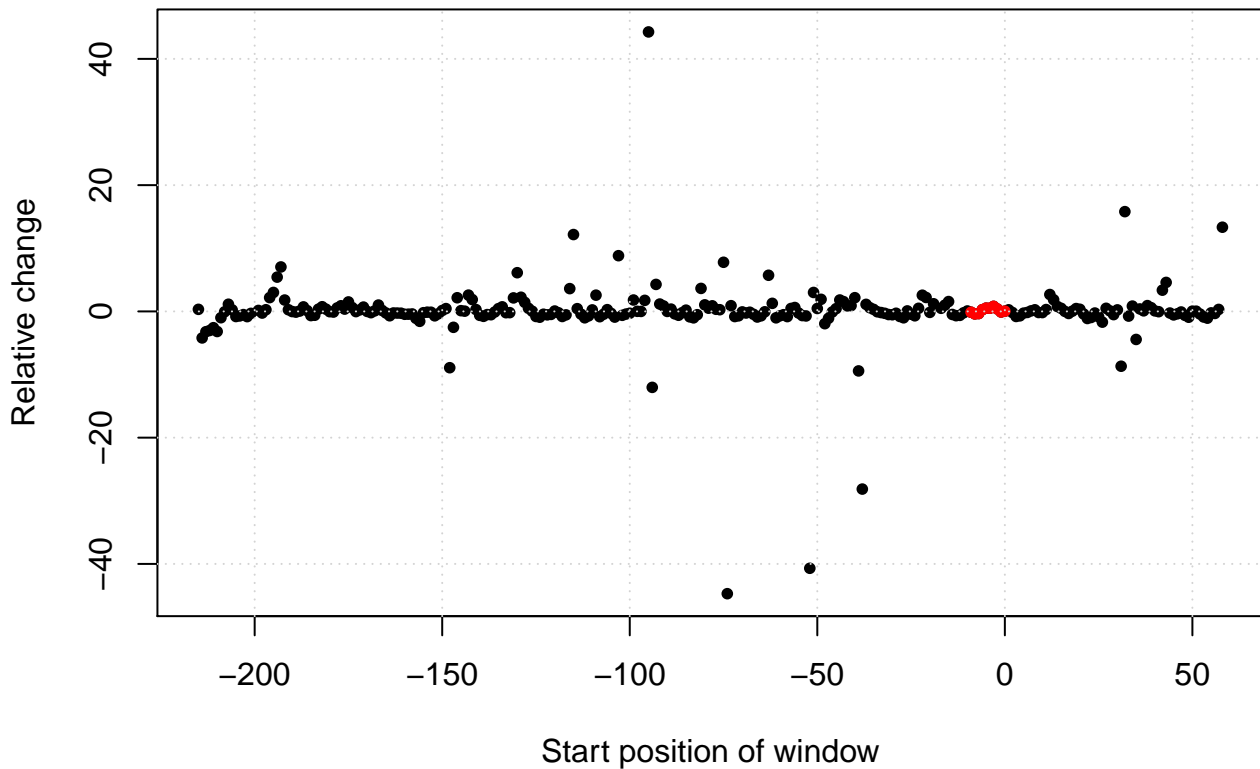

# P07H NFEV1 Window Size = 10

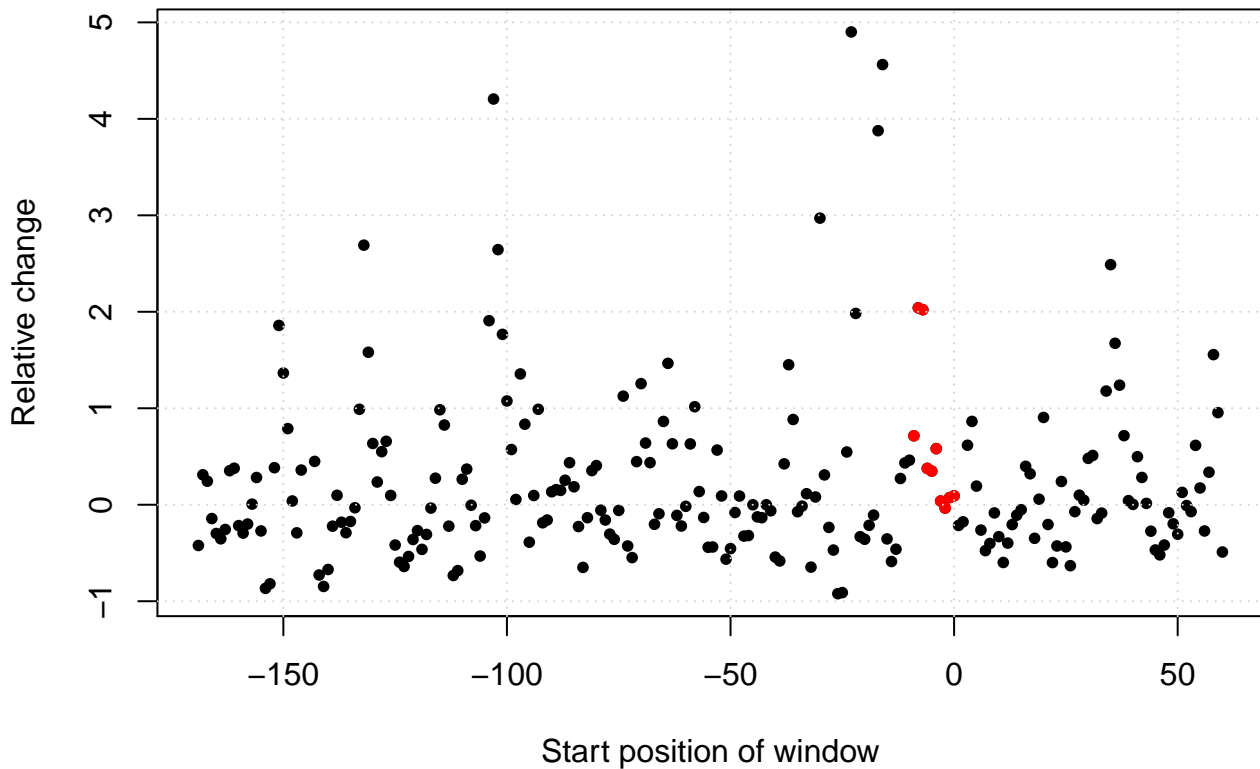

# P08H NFEV1 Window Size = 10

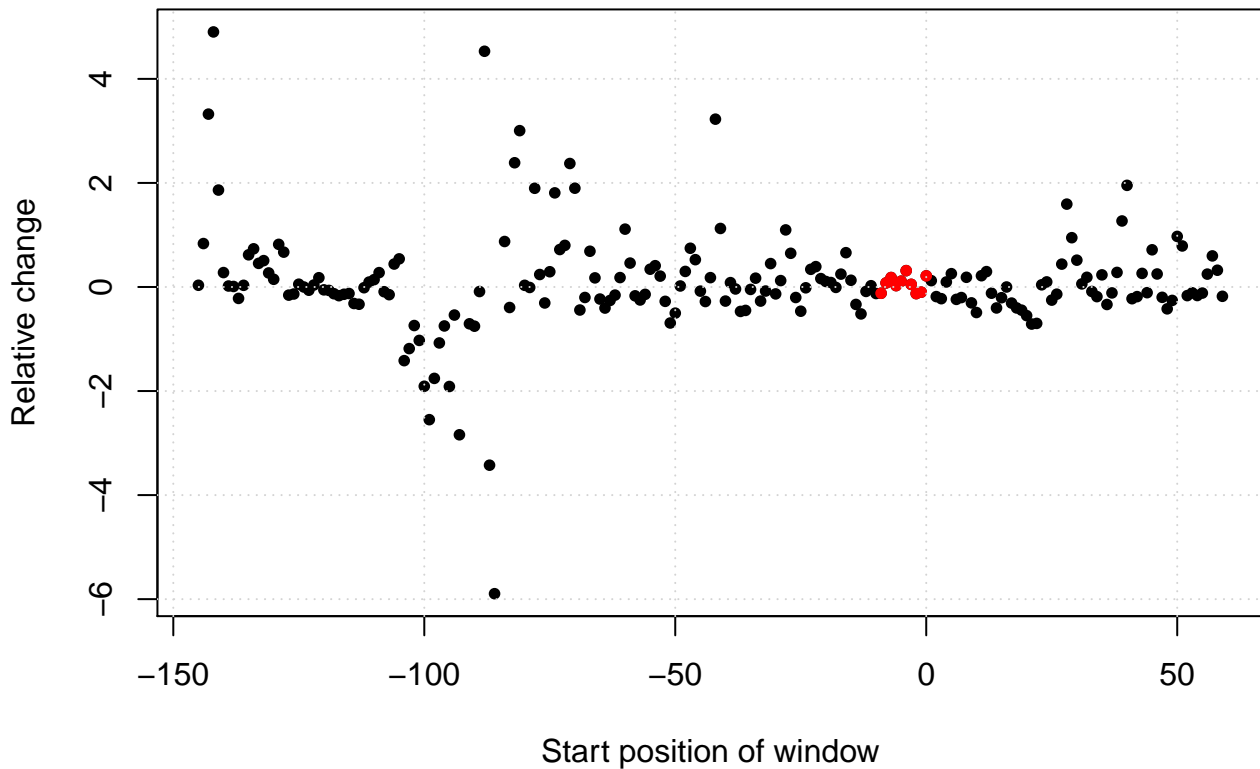

# P09H NFEV1 Window Size = 10

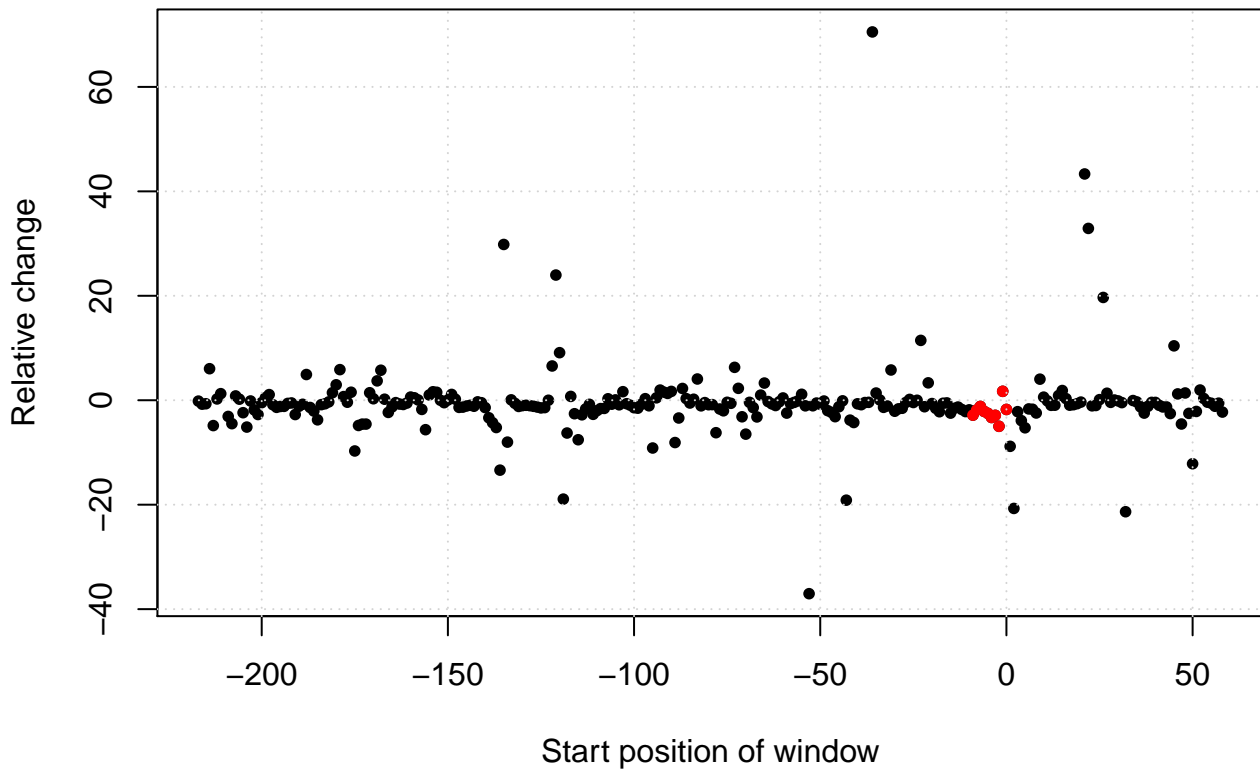



# P11H NFEV1 Window Size = 10

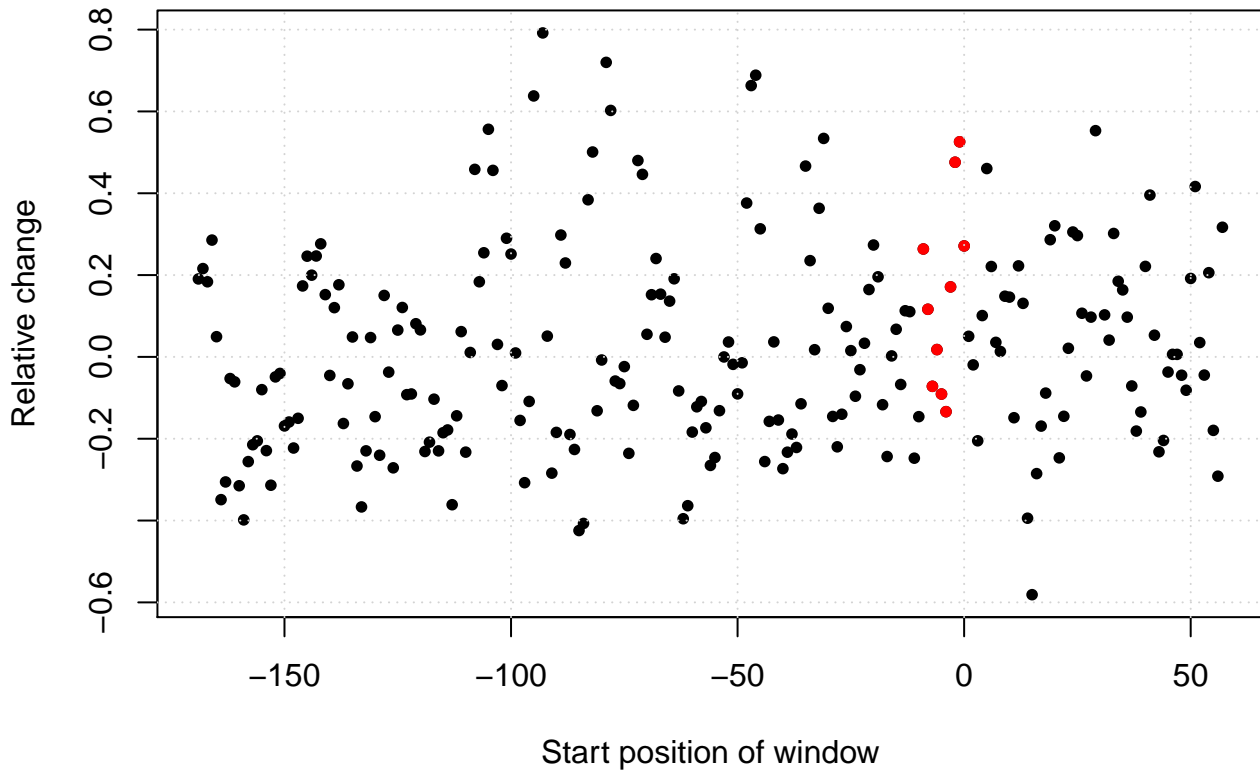

# P12H NFEV1 Window Size = 10

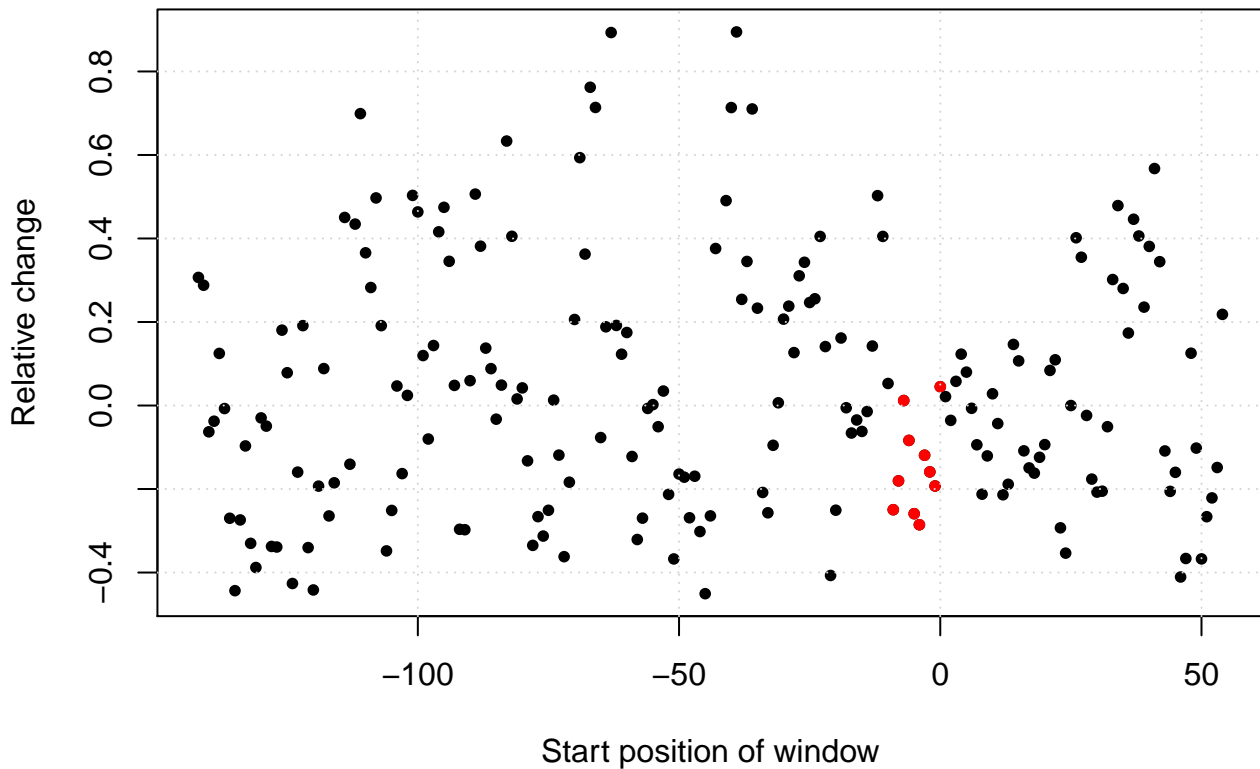

# P13H NFEV1 Window Size = 10

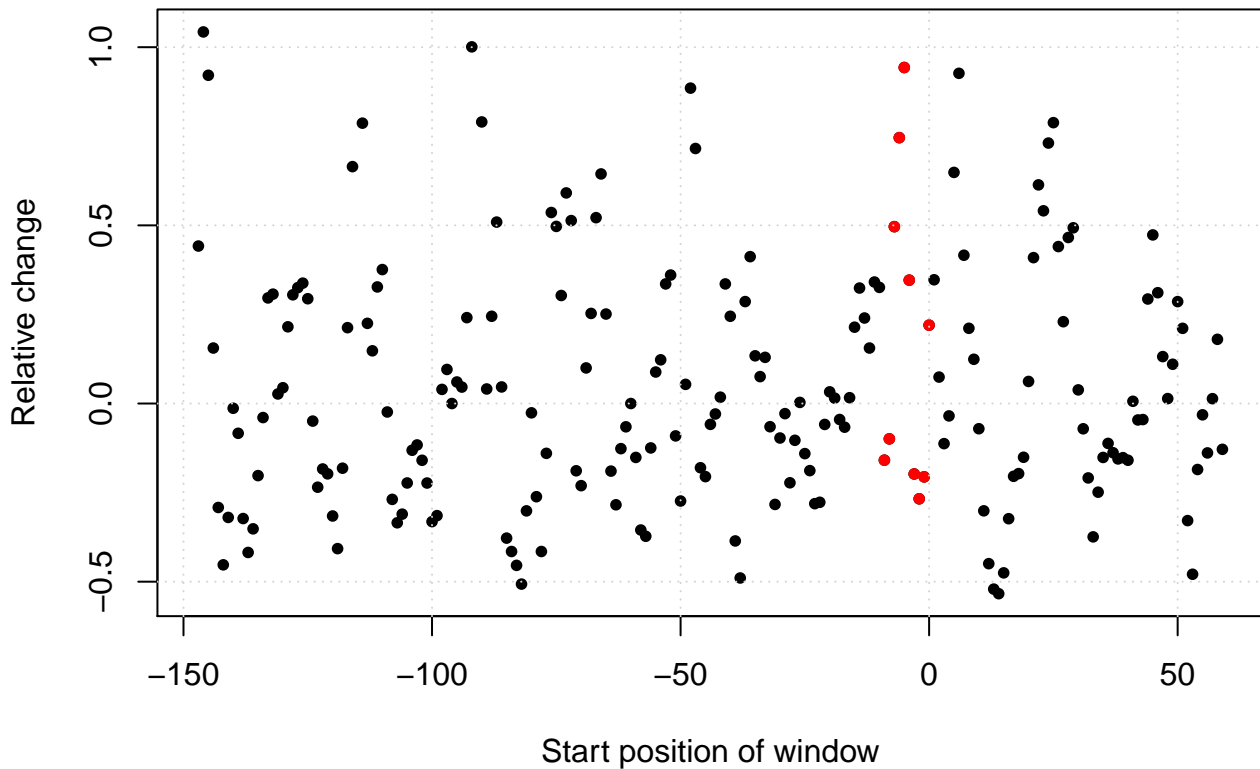

# P14H NFEV1 Window Size = 10

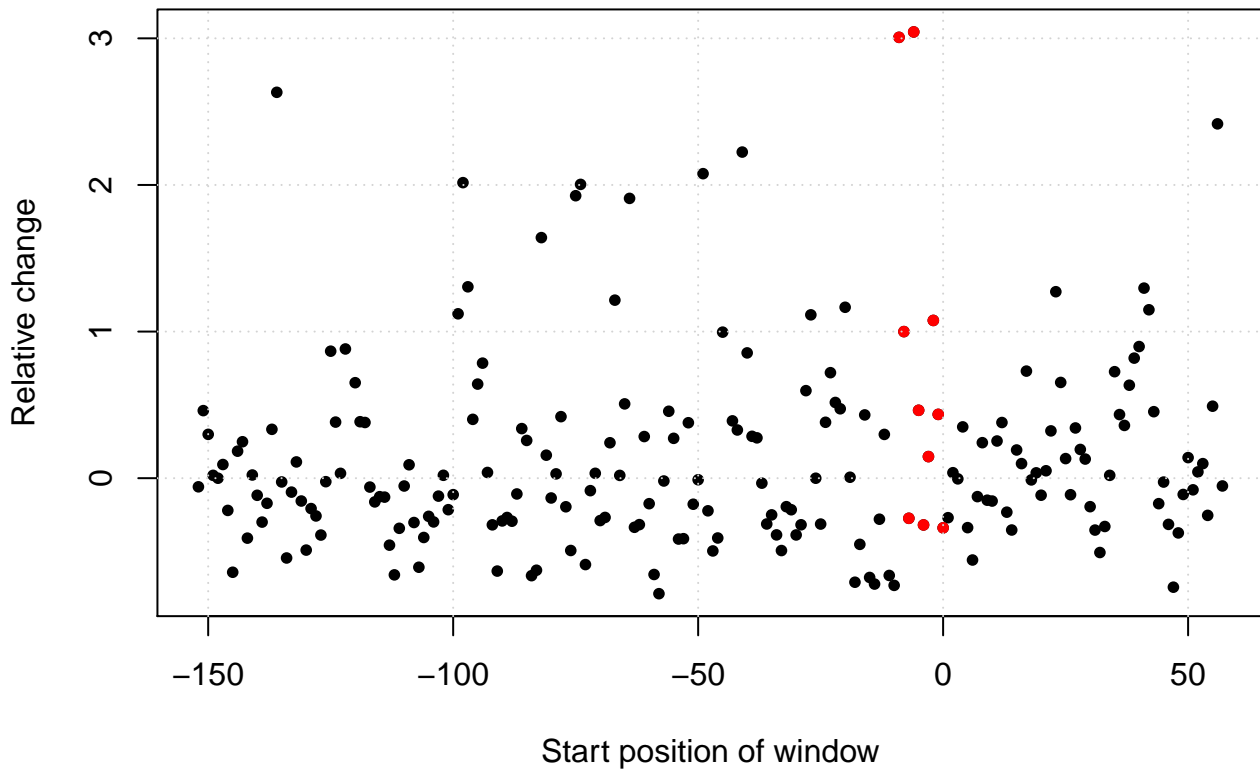

# P15H NFEV1 Window Size = 10

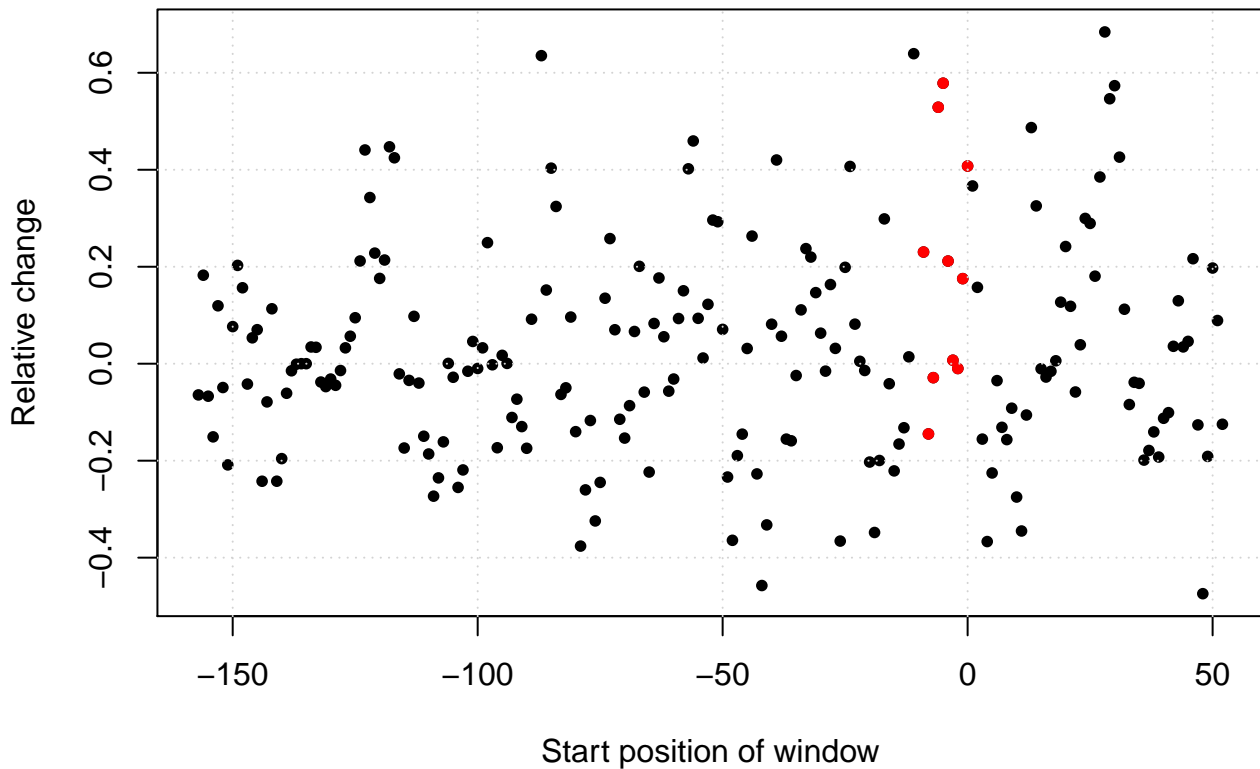

# P01A NFEV1 Window Size = 10

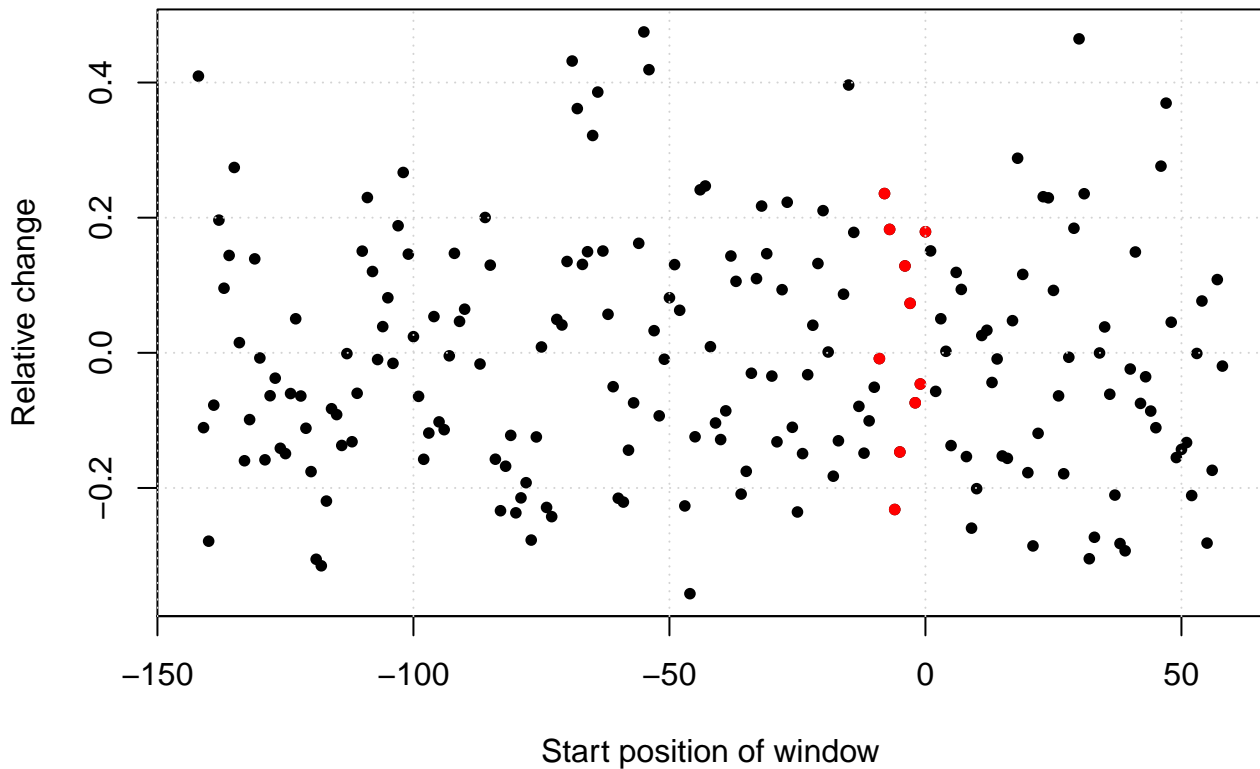

# P02A NFEV1 Window Size = 10

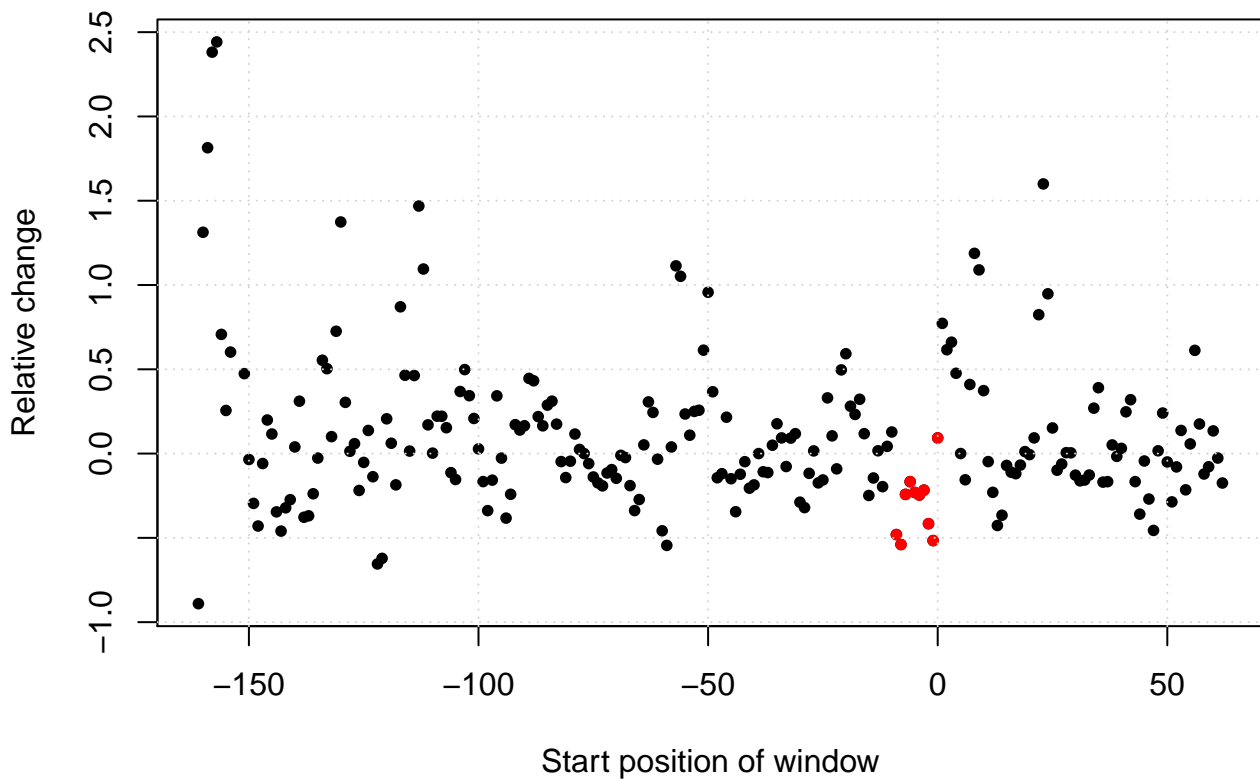

# P04A NFEV1 Window Size = 10

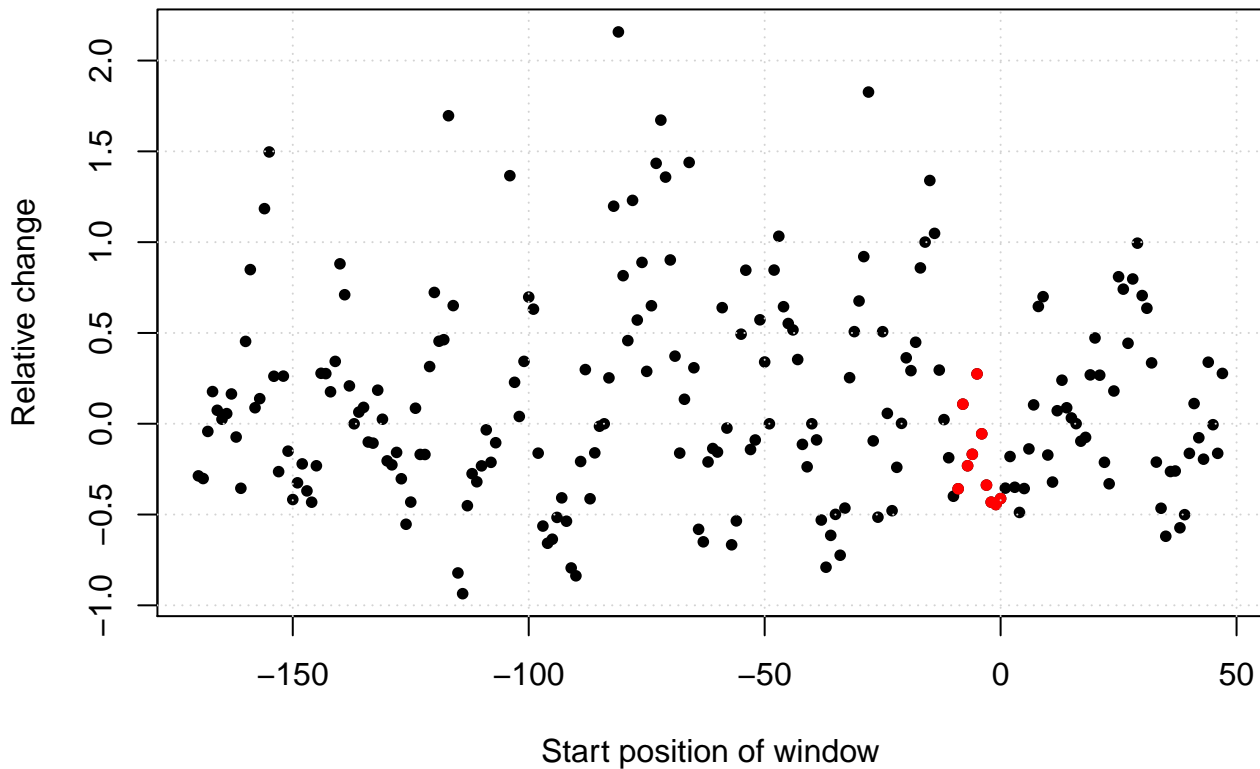



# P05A NFEV1 Window Size = 10

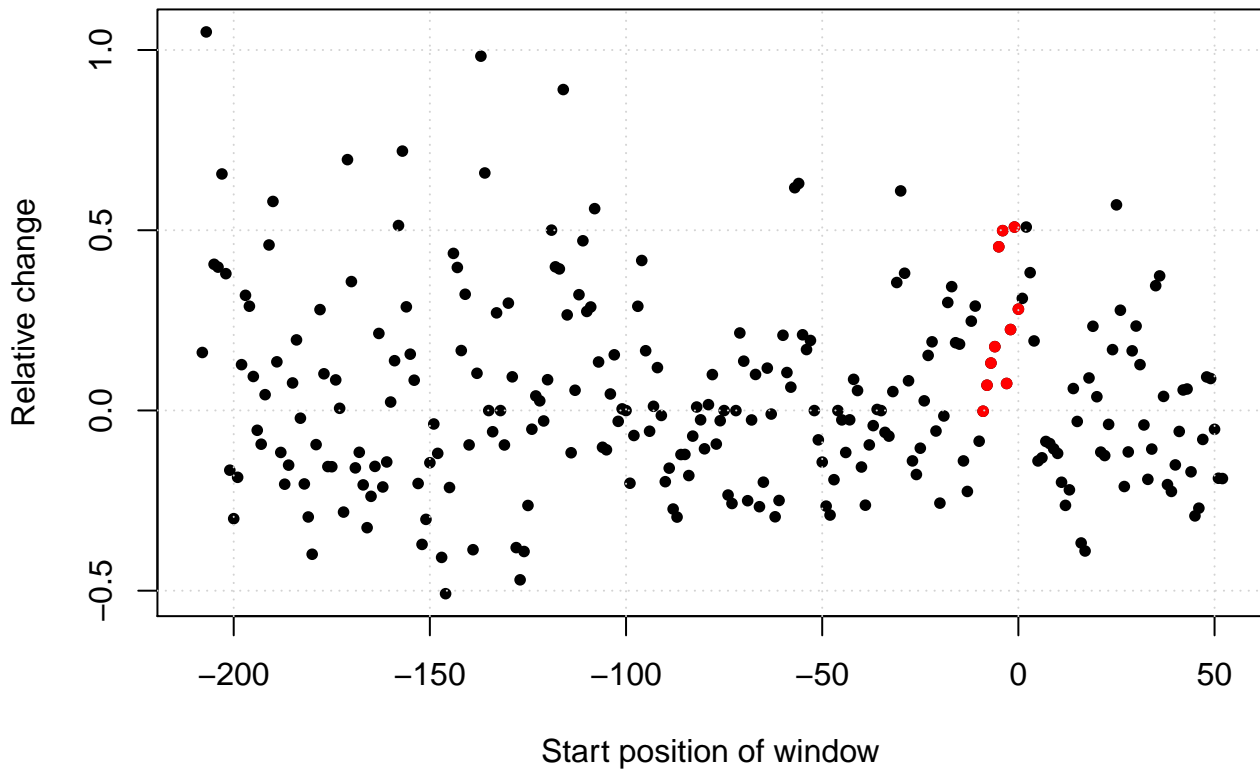

## P06A NFEV1 Window Size = 10

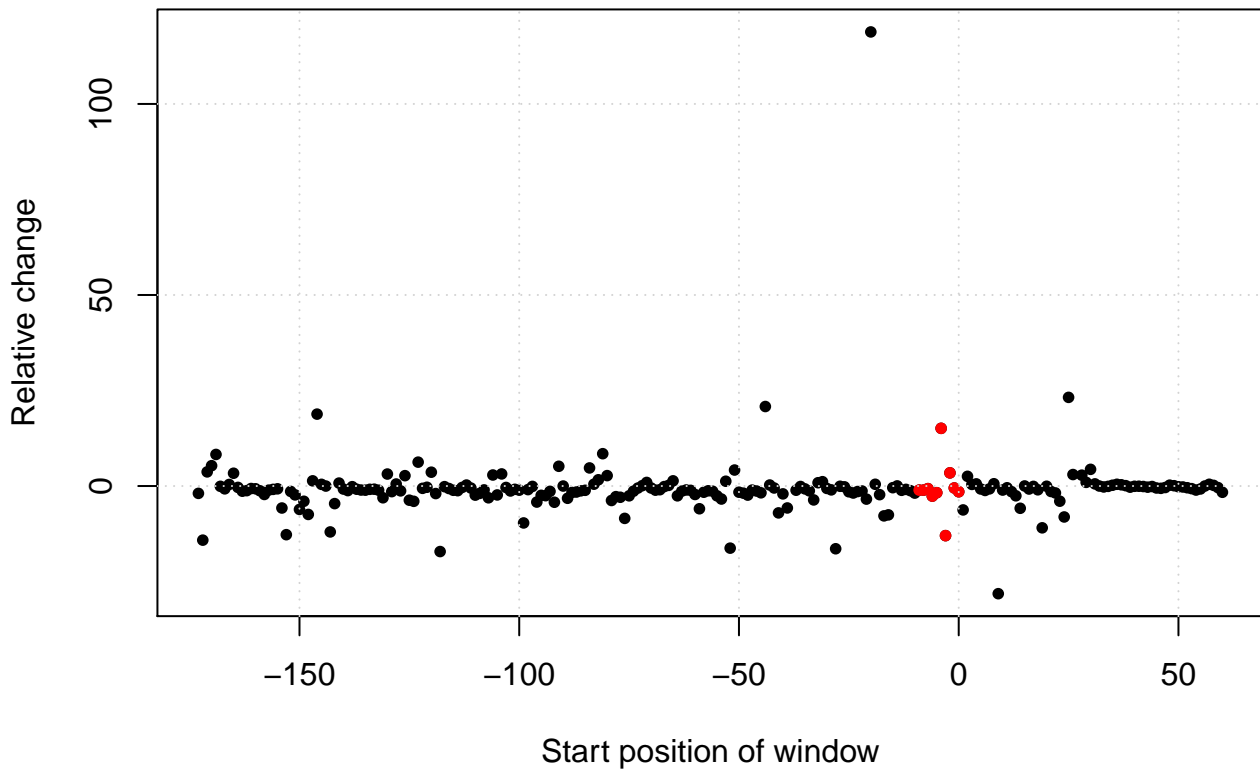

# P07A NFEV1 Window Size = 10

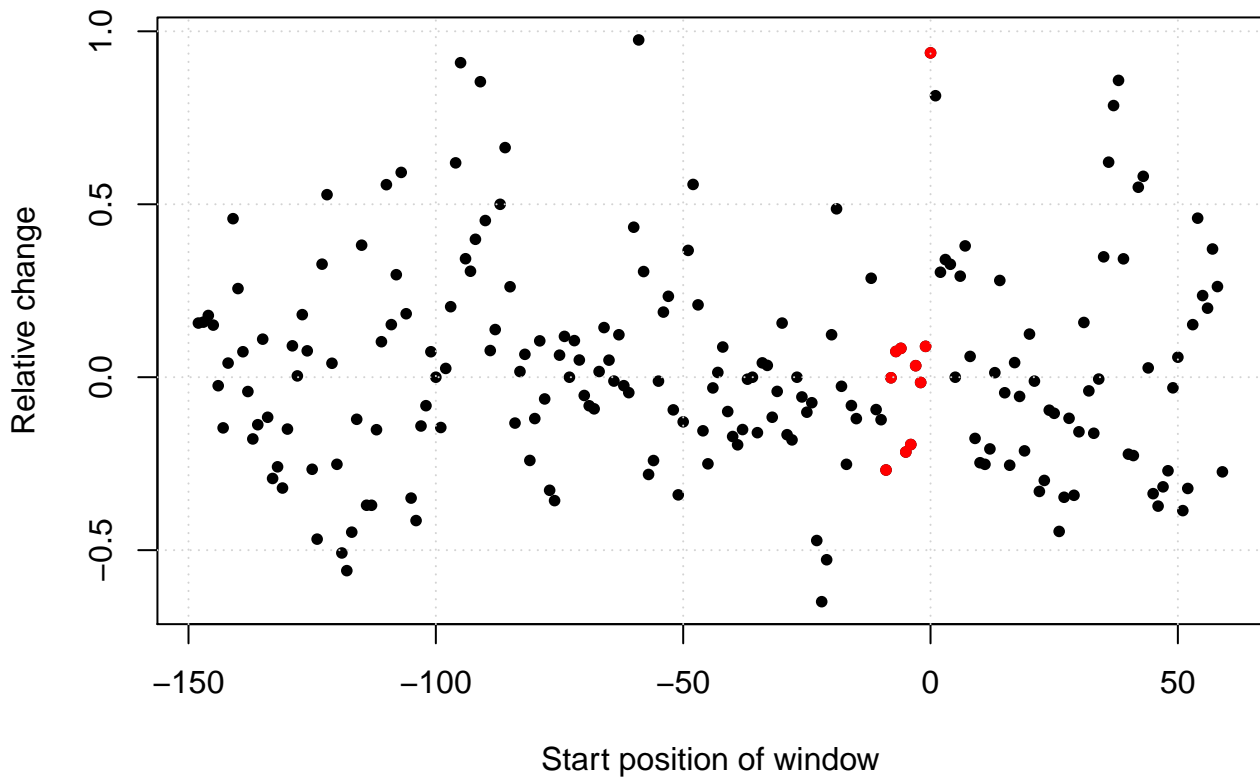

# P08A NFEV1 Window Size = 10

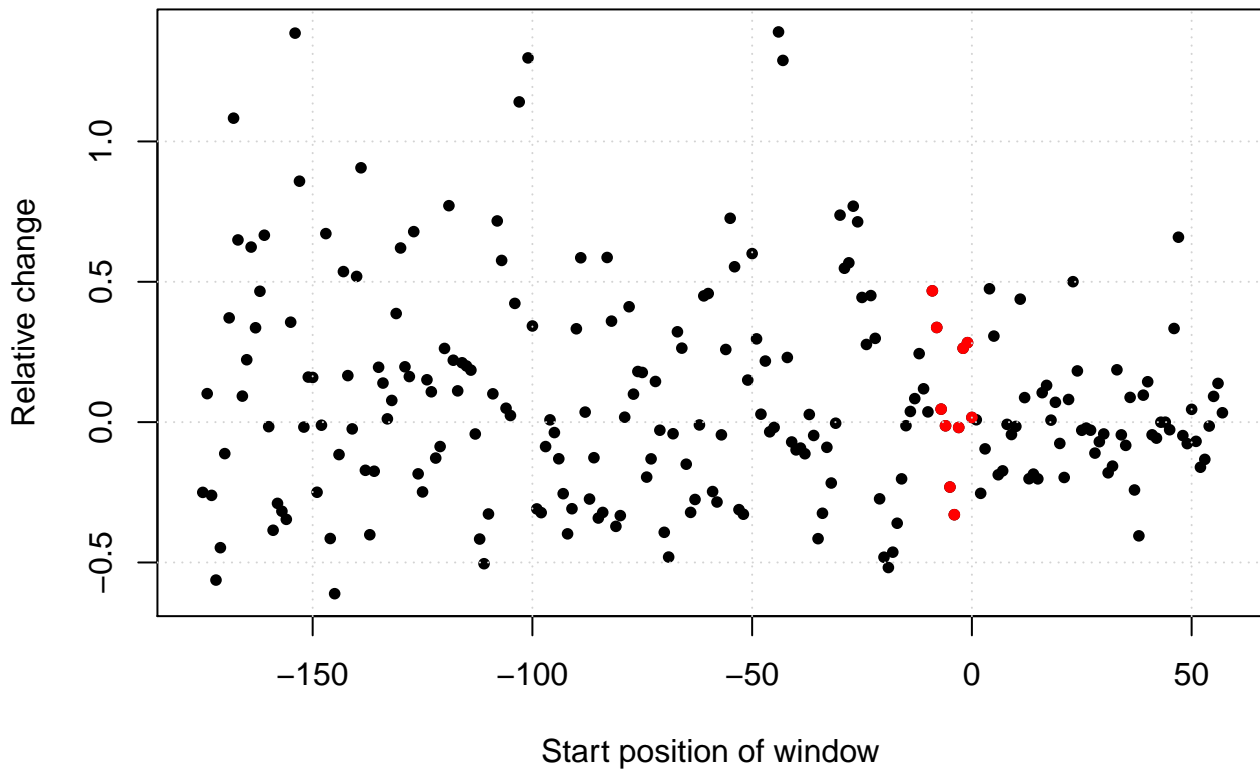

# P09A NFEV1 Window Size = 10

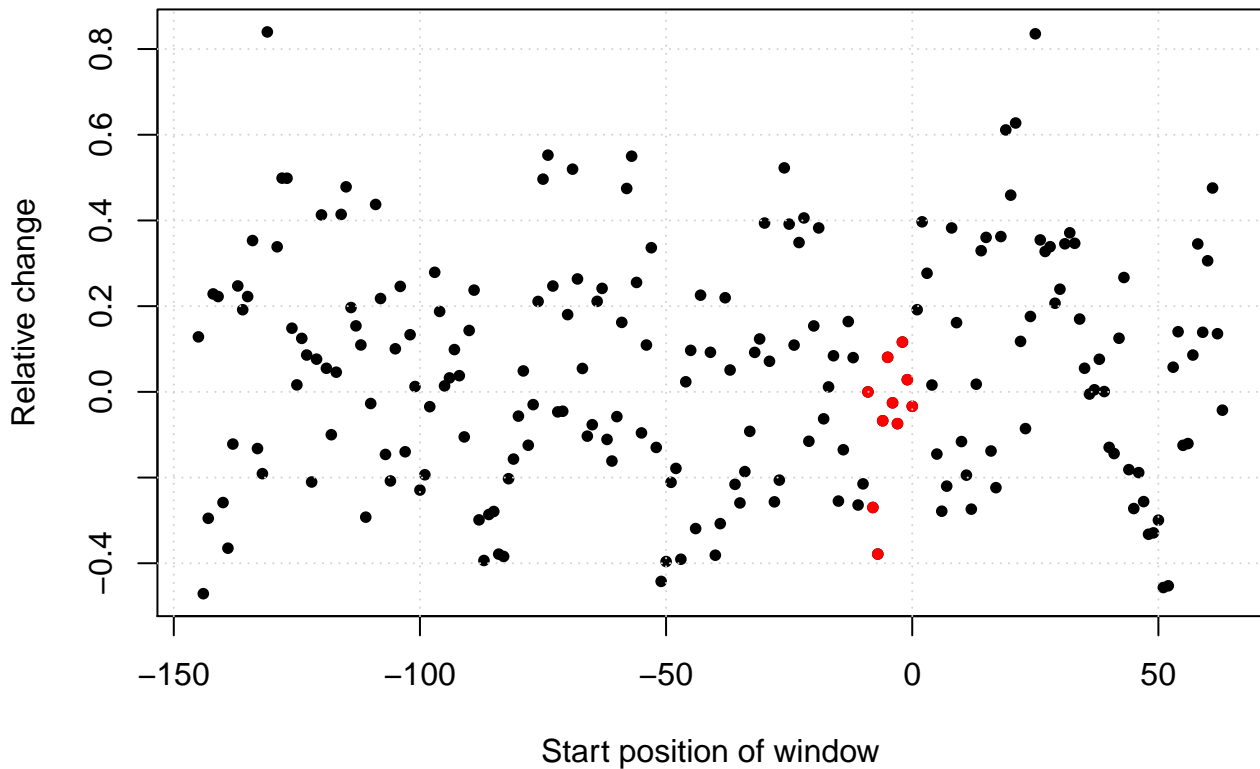

# P10A NFEV1 Window Size = 10

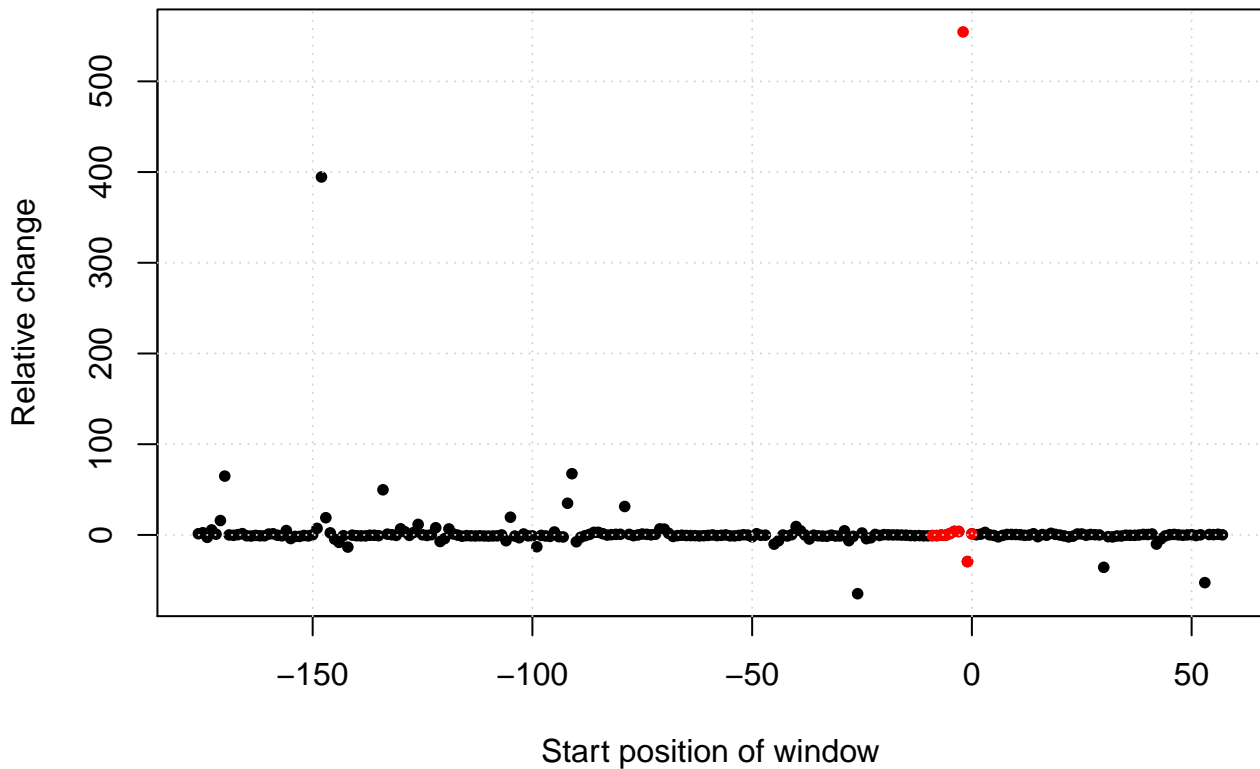

# P11A NFEV1 Window Size = 10

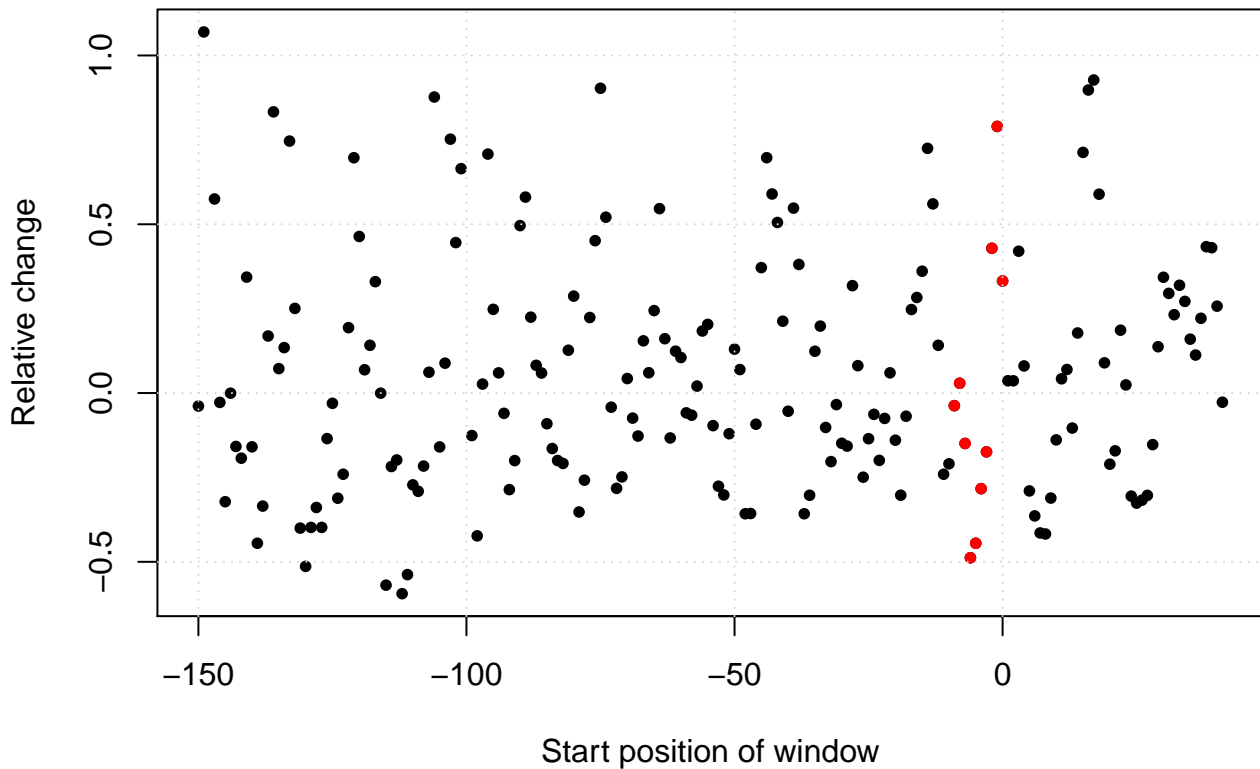

# P12A NFEV1 Window Size = 10

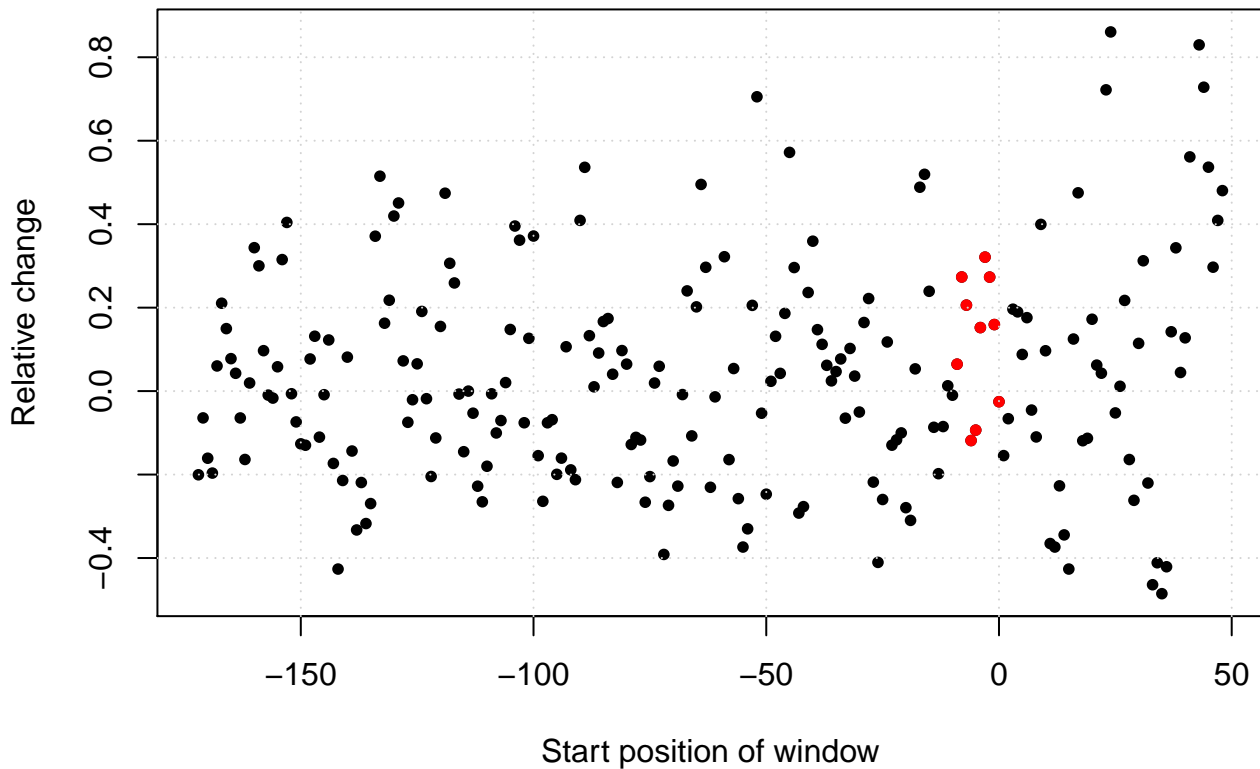



# P13A NFEV1 Window Size = 10

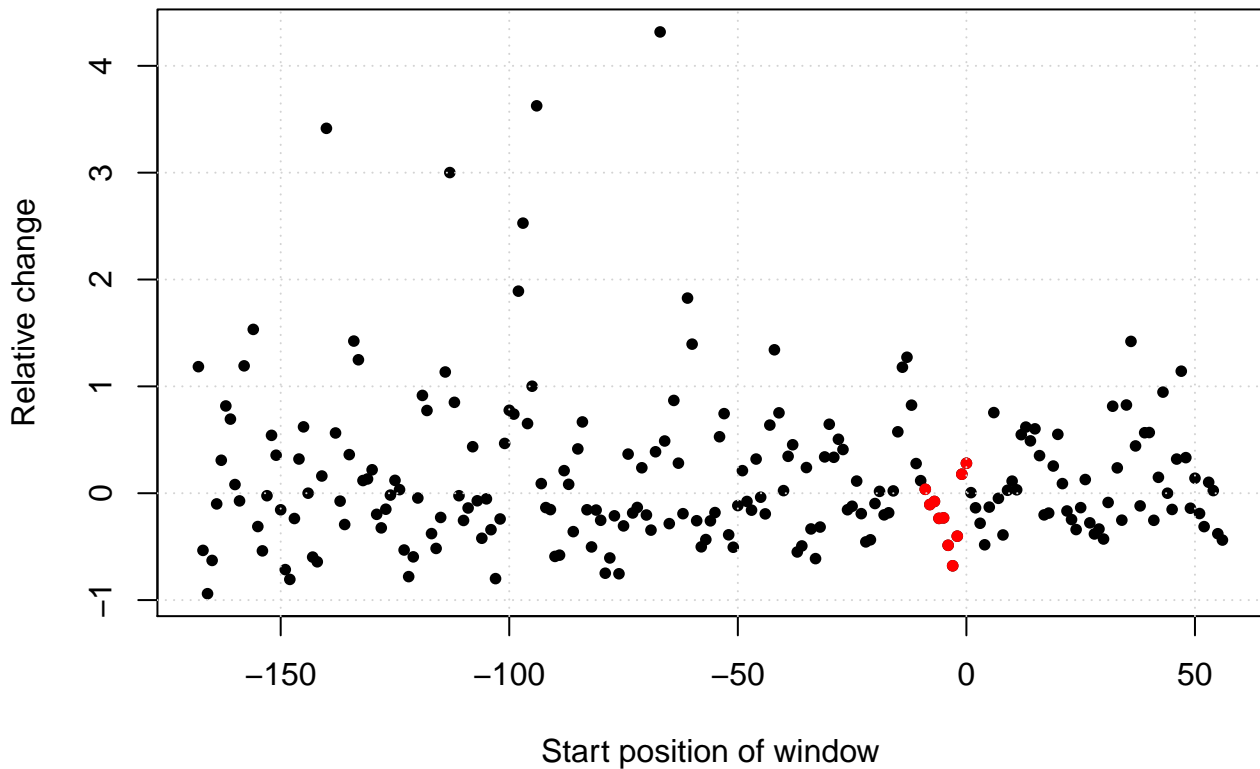

# P01H NFEV1FVC Window Size = 10

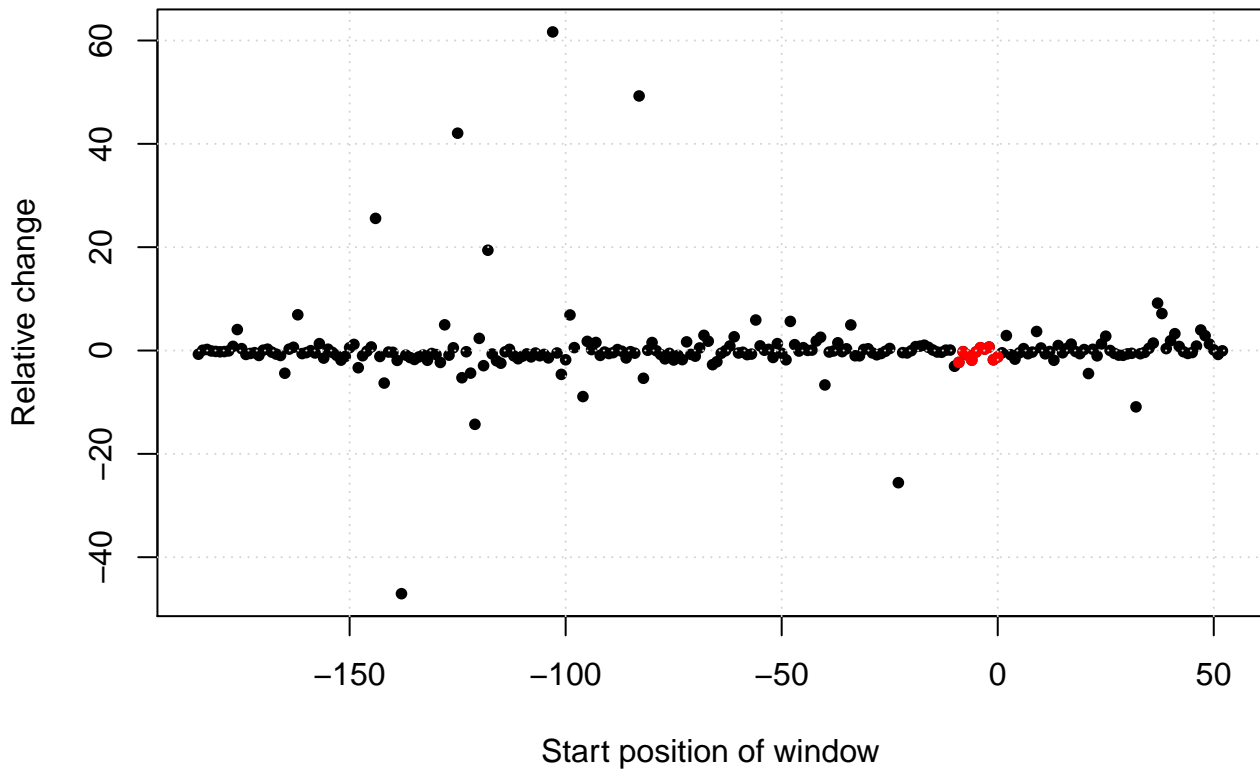

# P03H NFEV1FVC Window Size = 10

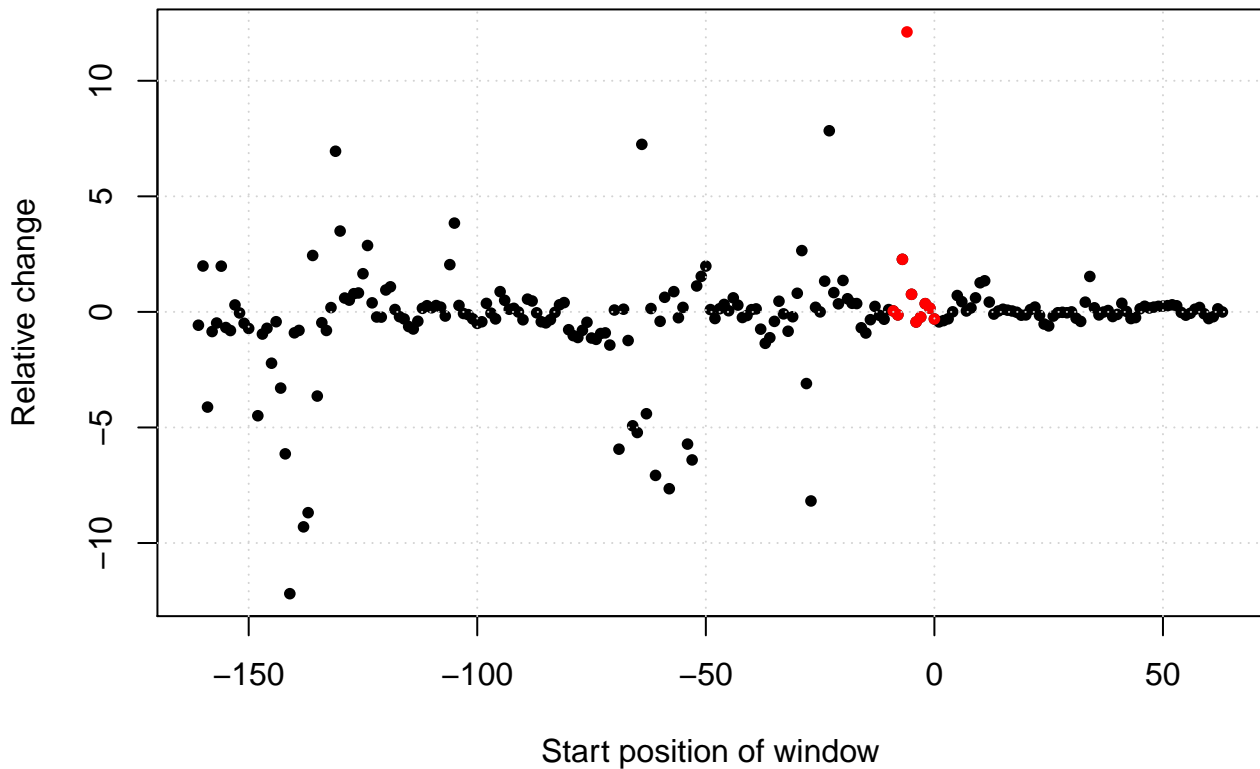

# P05H NFEV1FVC Window Size = 10

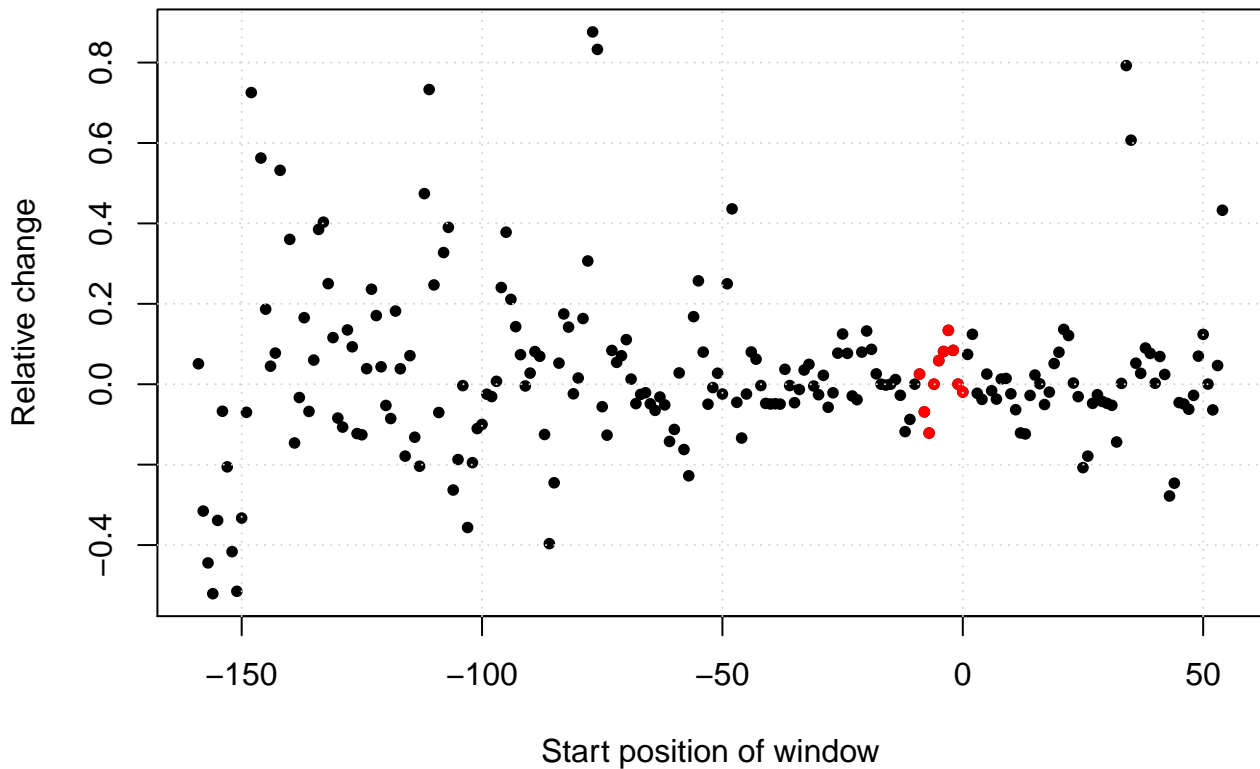

# P06H NFEV1FVC Window Size = 10

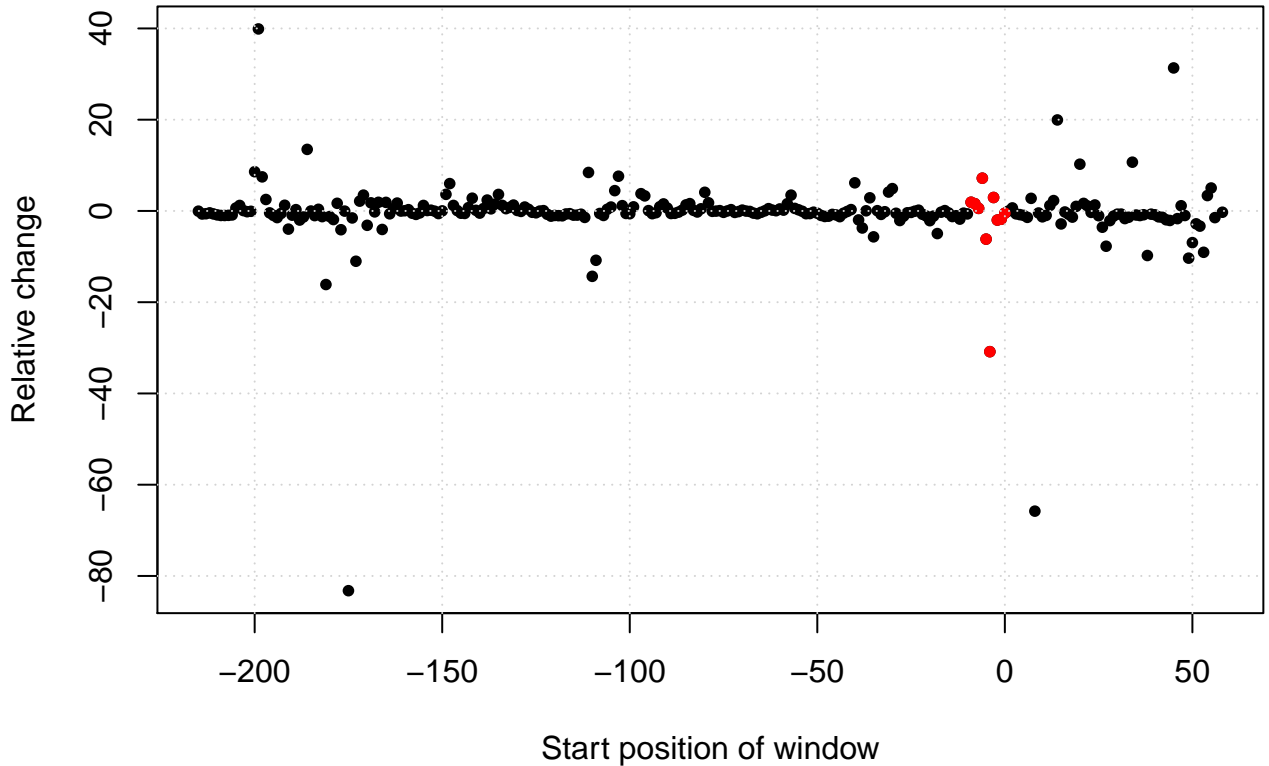

# P07H NFEV1FVC Window Size = 10

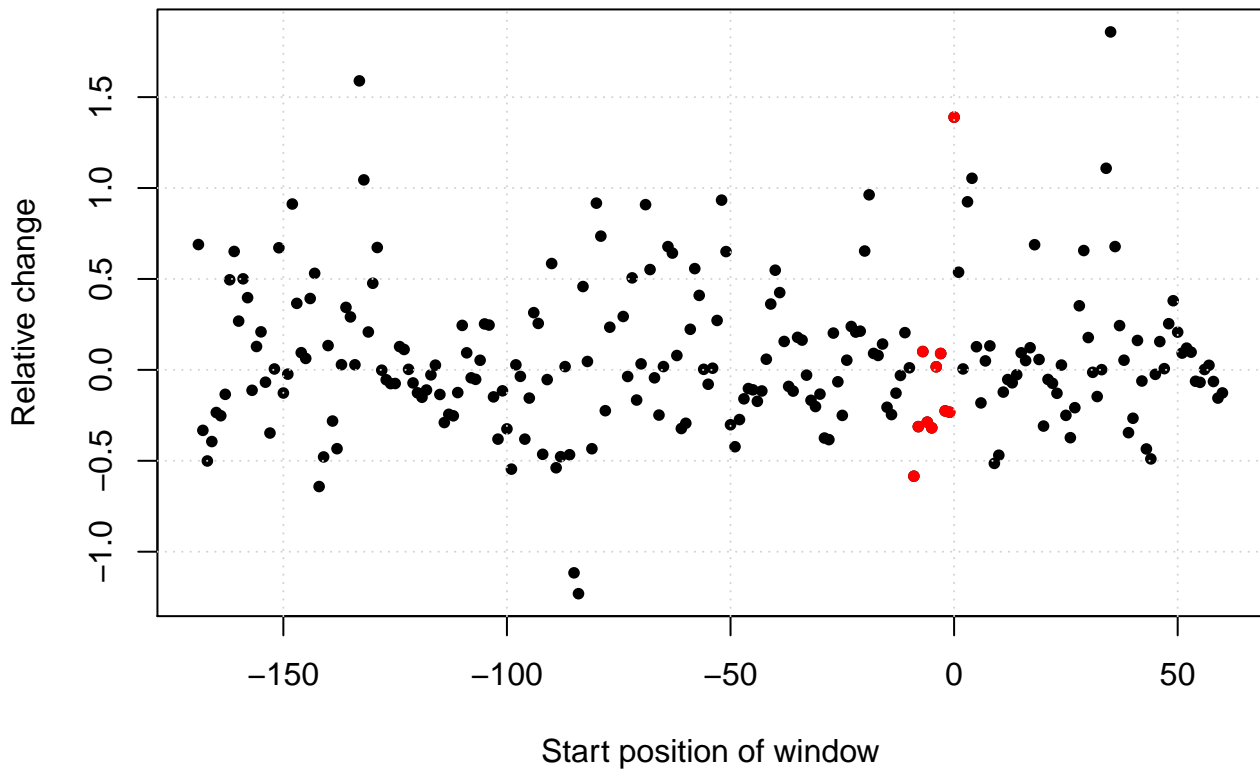

# P08H NFEV1FVC Window Size = 10

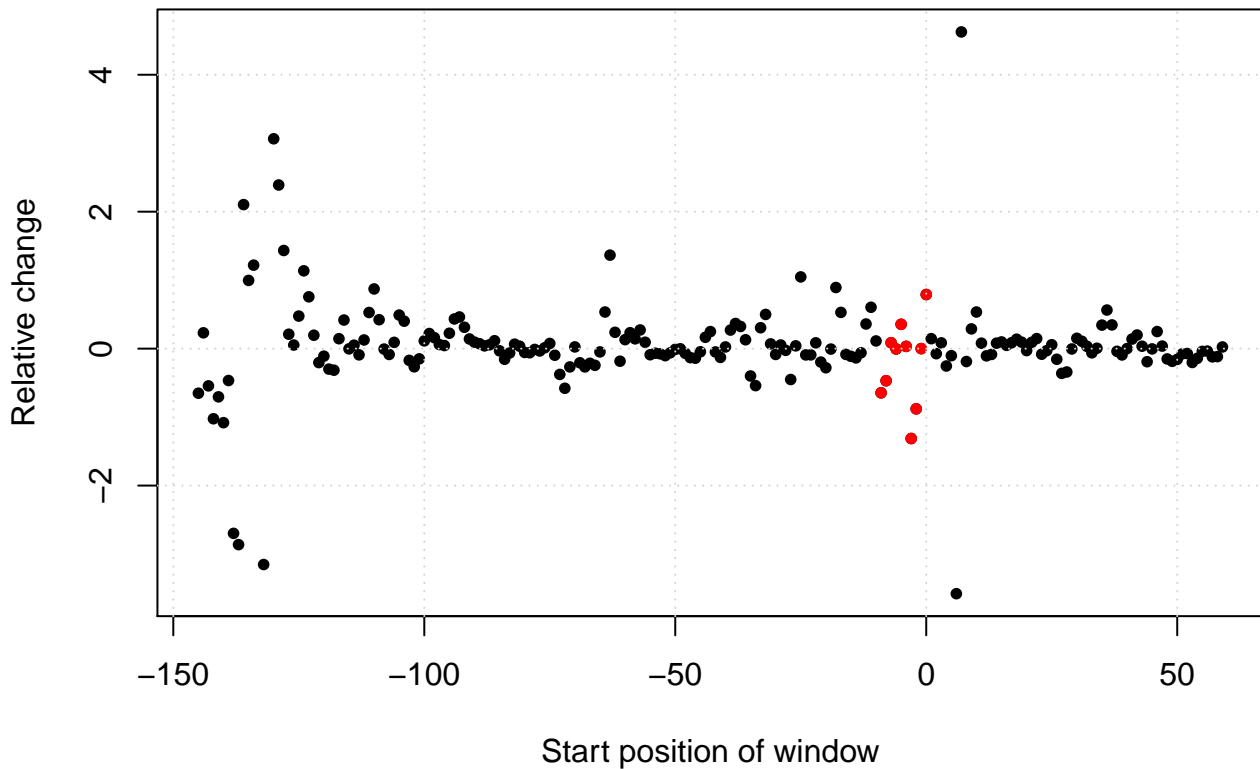

# P09H NFEV1FVC Window Size = 10

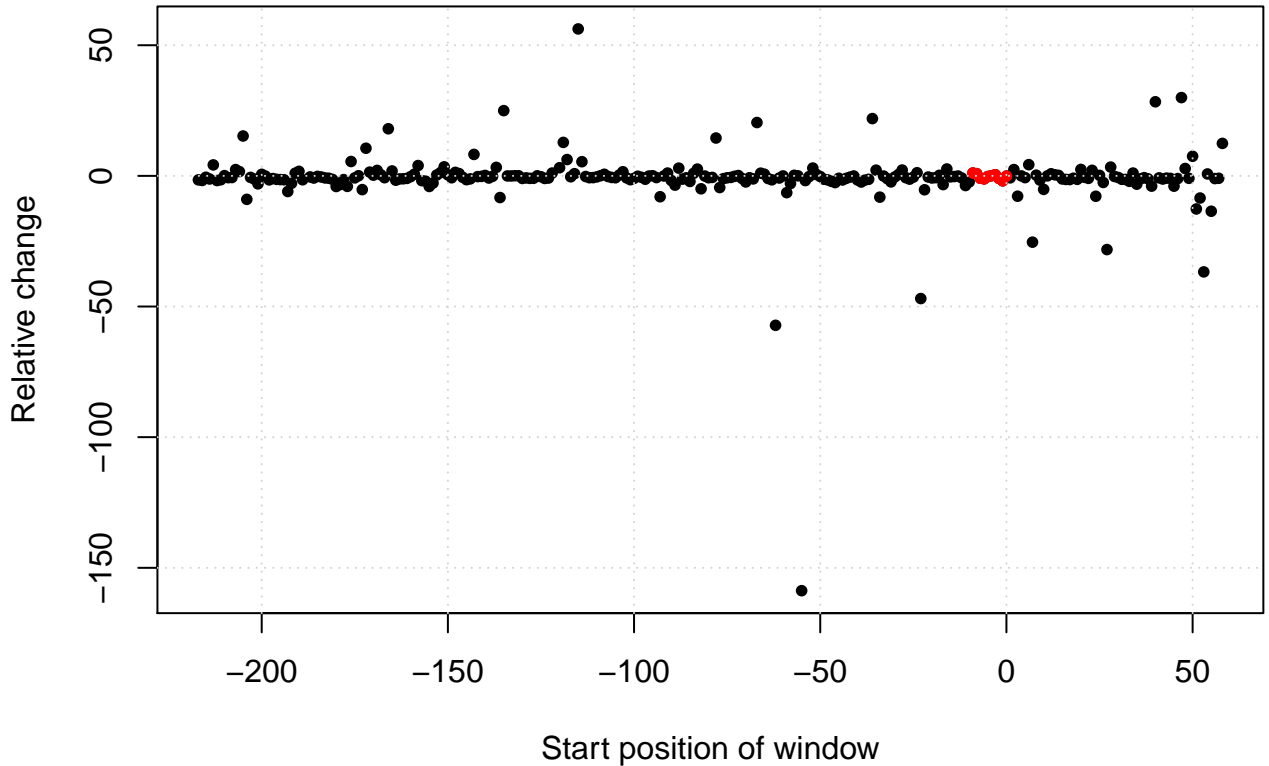



# P11H NFEV1FVC Window Size = 10

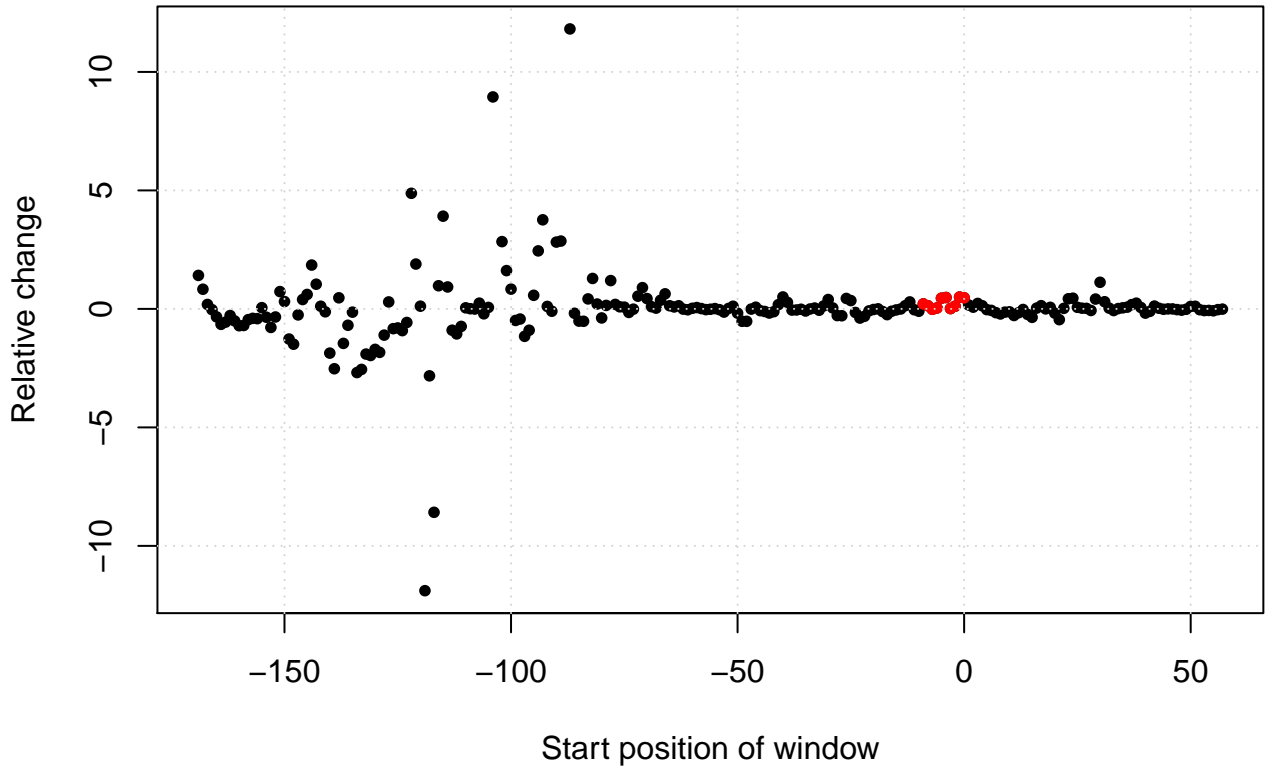

# P12H NFEV1FVC Window Size = 10

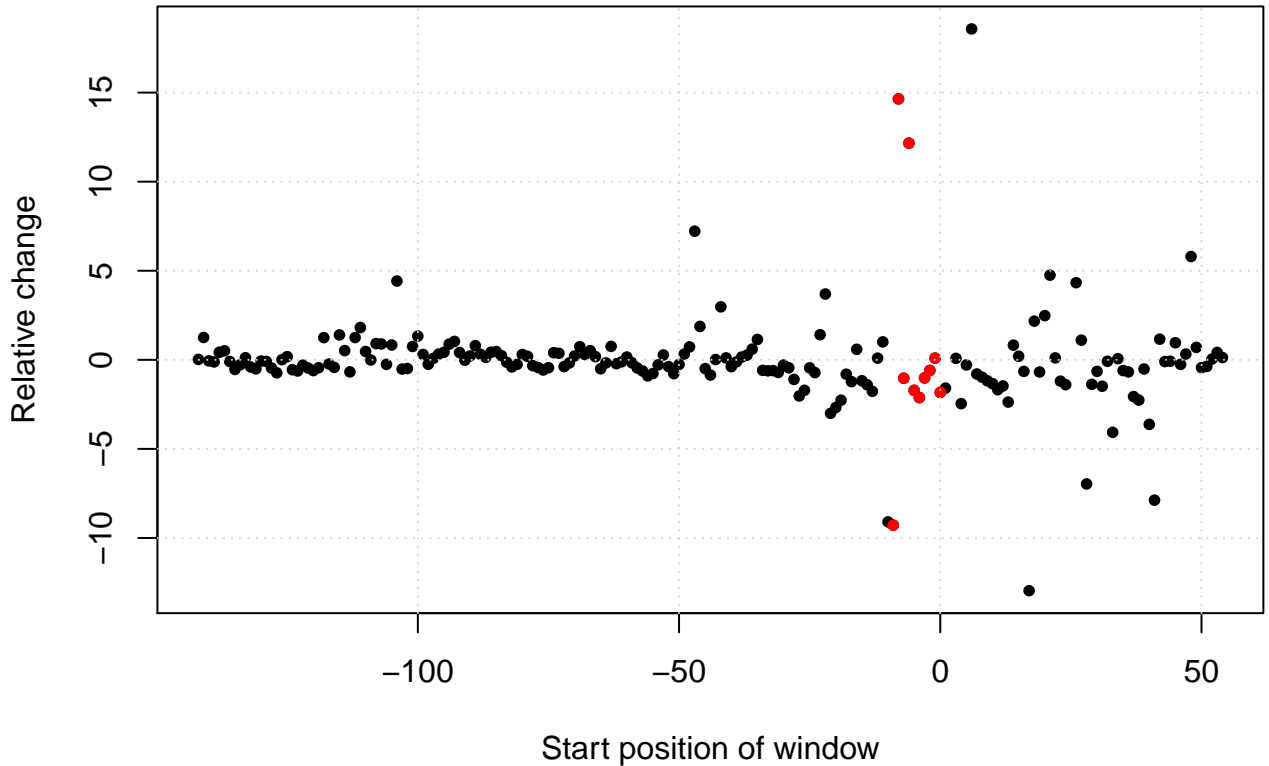

# P13H NFEV1FVC Window Size = 10

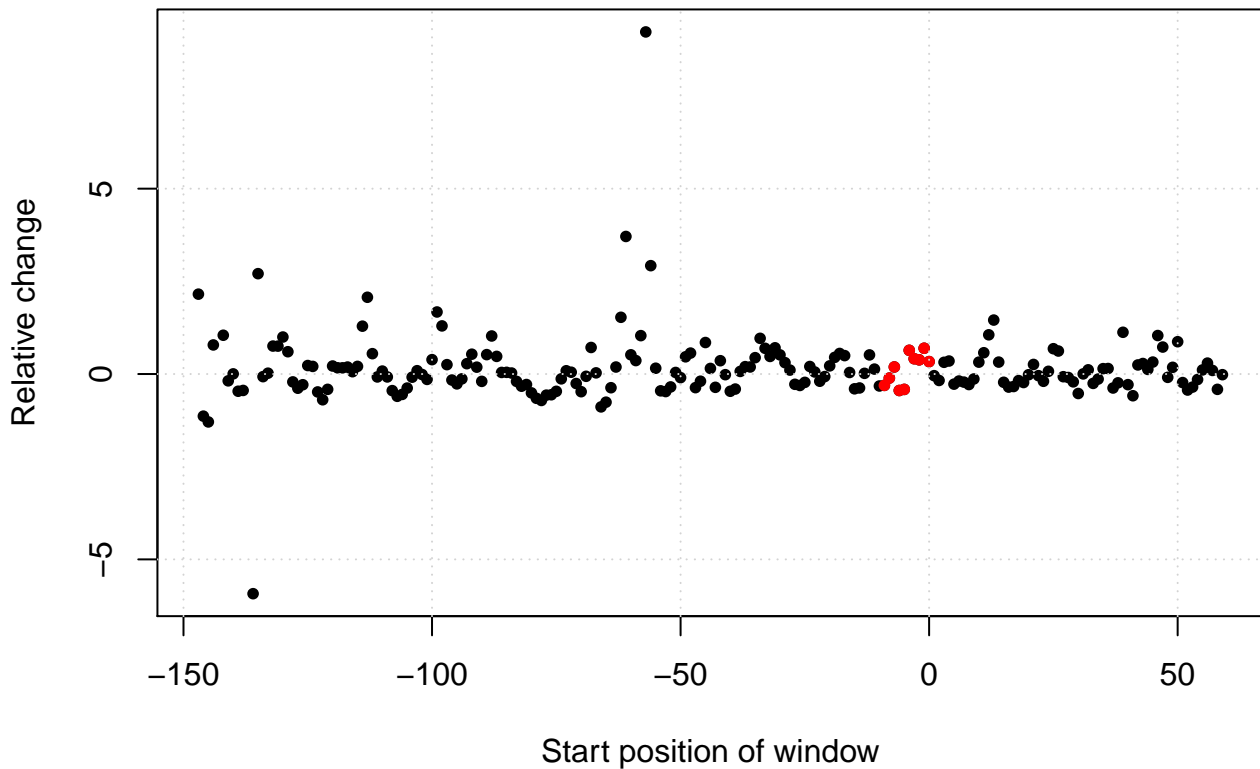

# P14H NFEV1FVC Window Size = 10

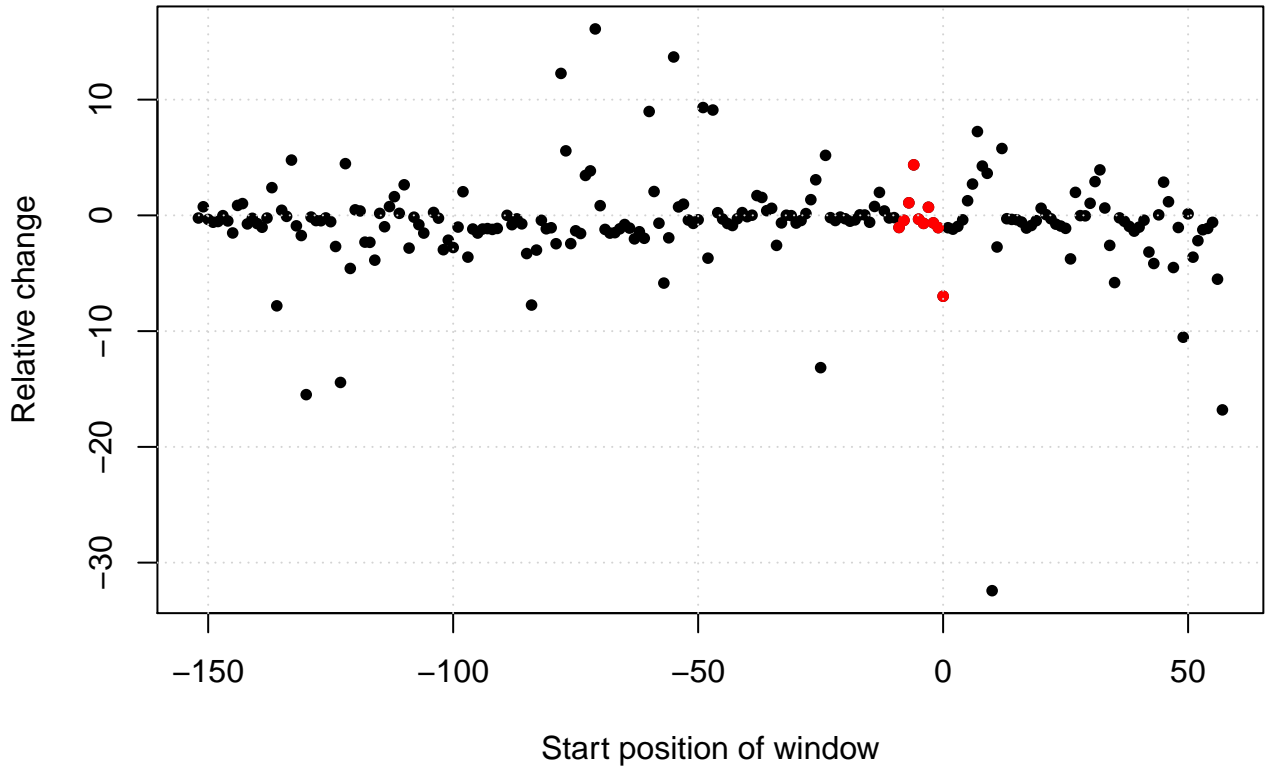

# P15H NFEV1FVC Window Size = 10

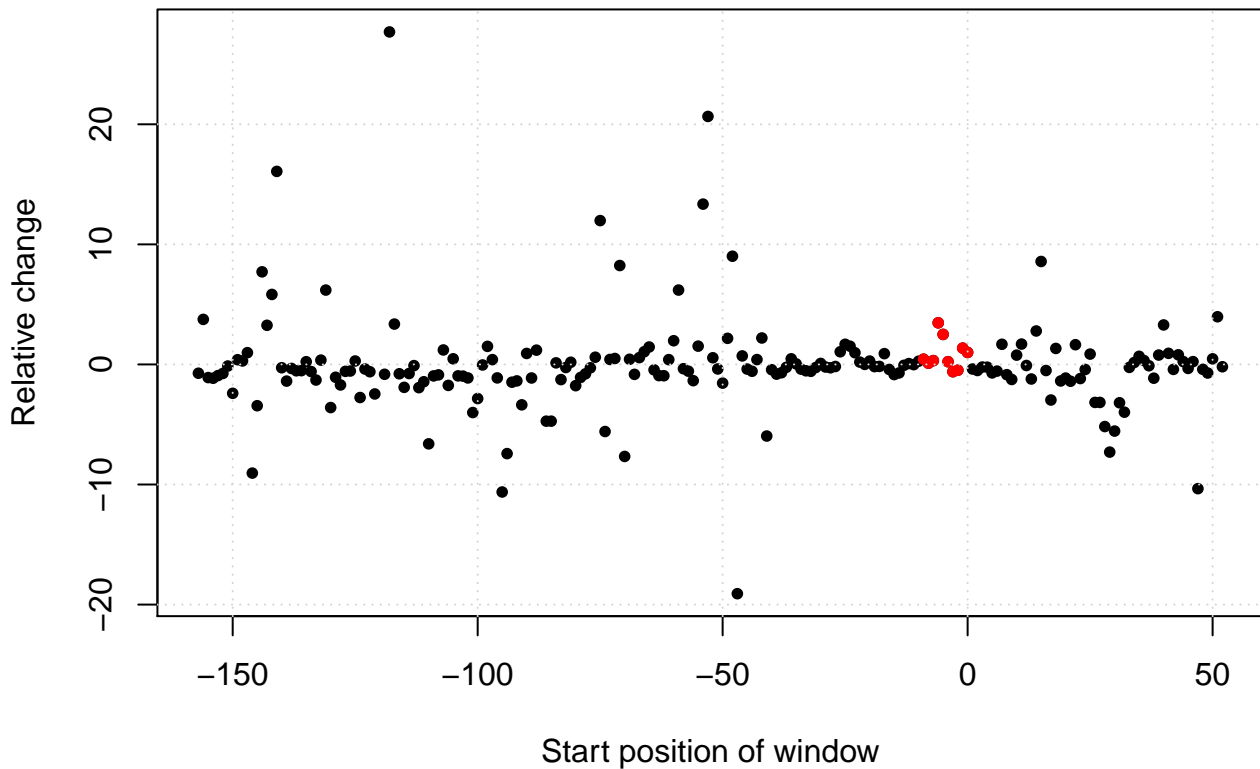

# P01A NFEV1FVC Window Size = 10

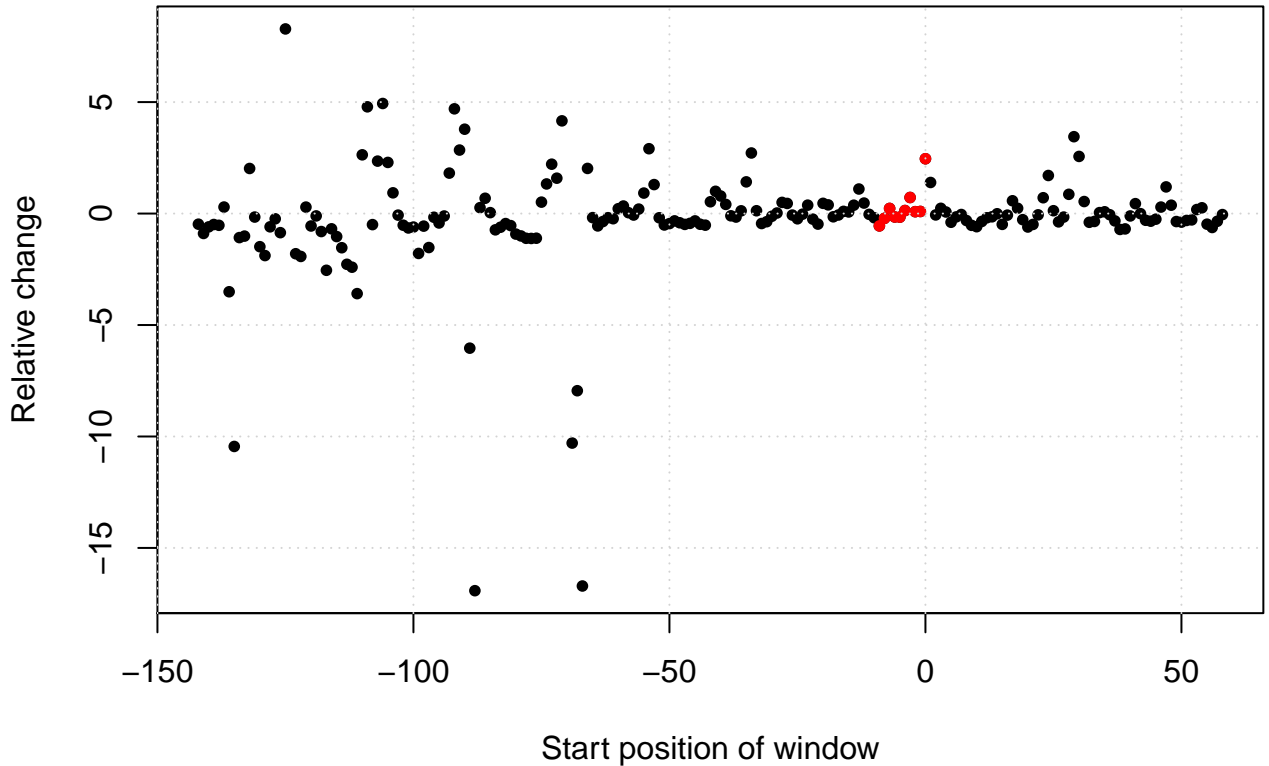

# P02A NFEV1FVC Window Size = 10

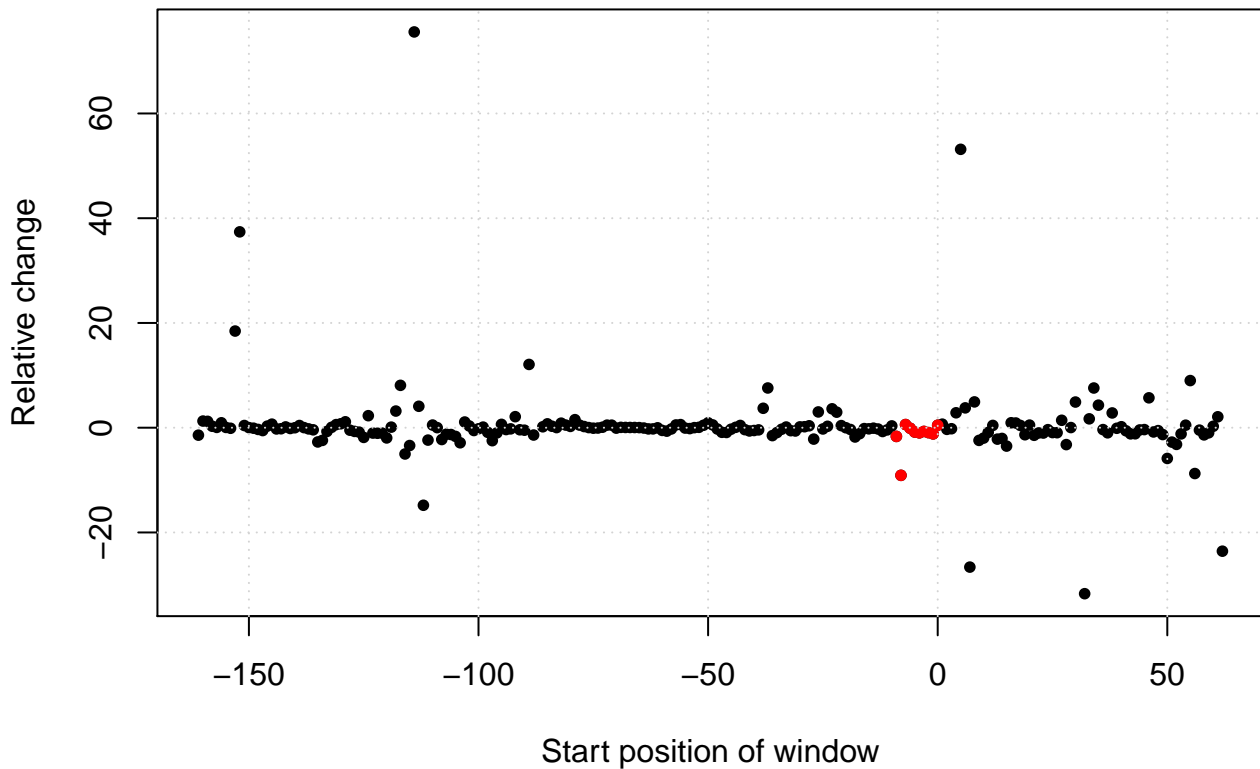

# P04A NFEV1FVC Window Size = 10

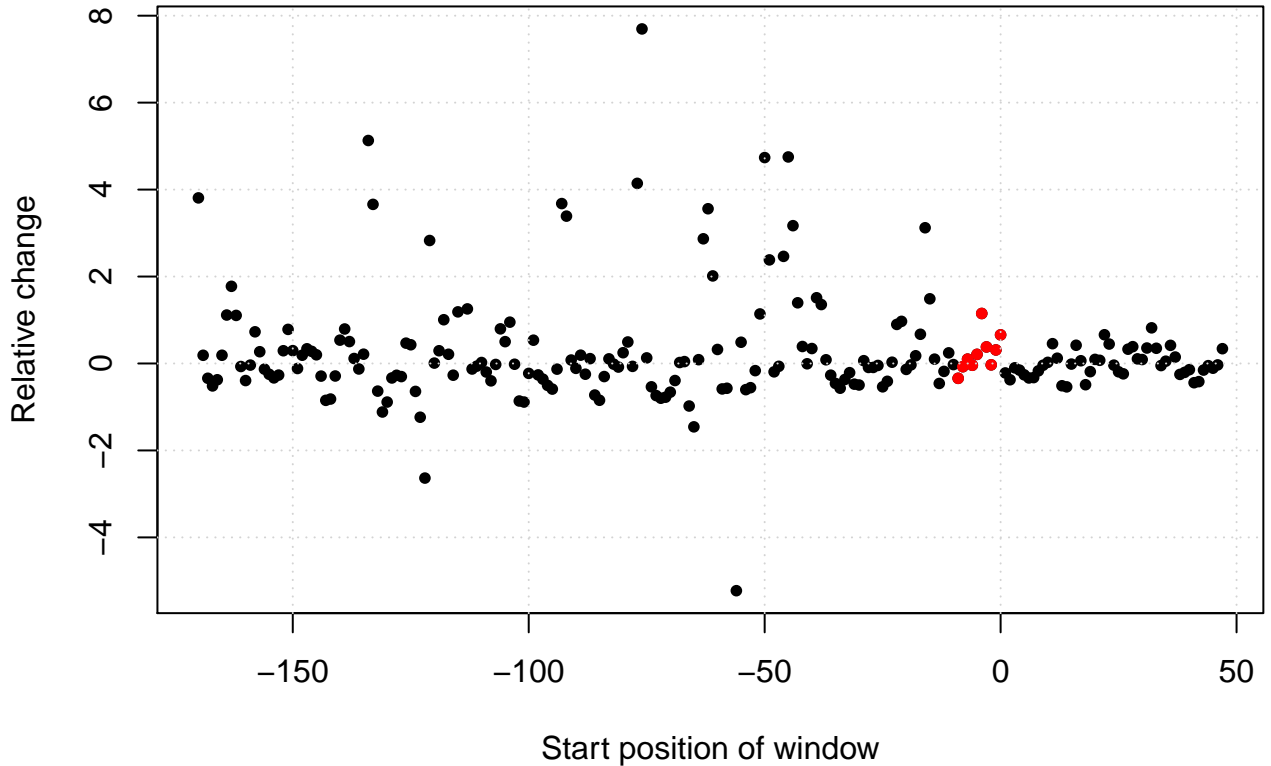



# P05A NFEV1FVC Window Size = 10

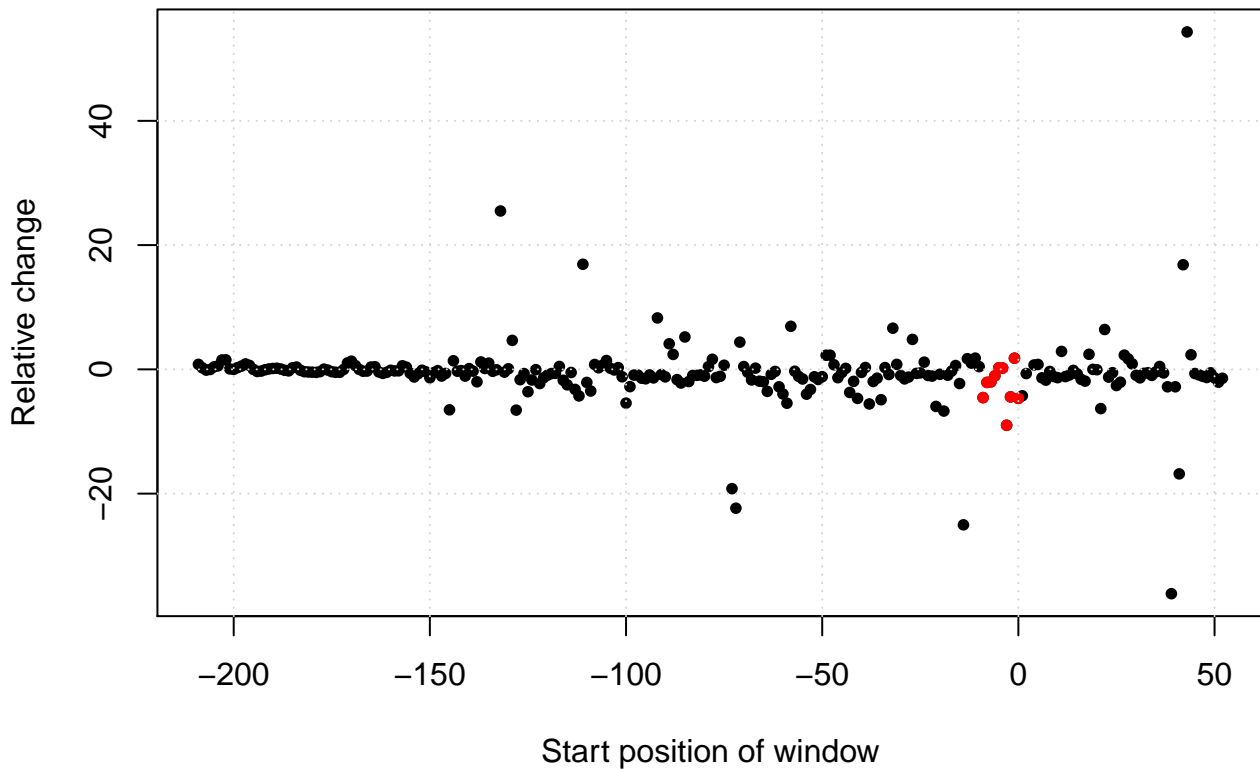

# P06A NFEV1FVC Window Size = 10

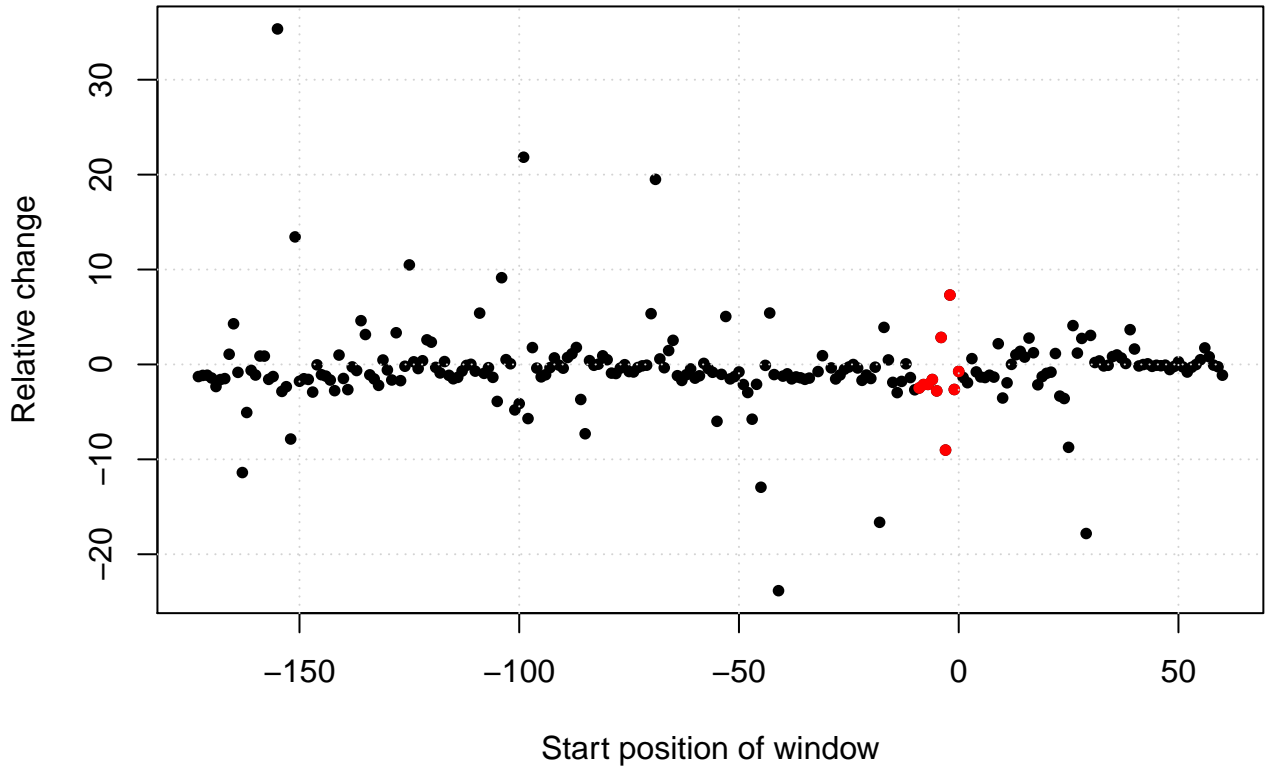

# P07A NFEV1FVC Window Size = 10

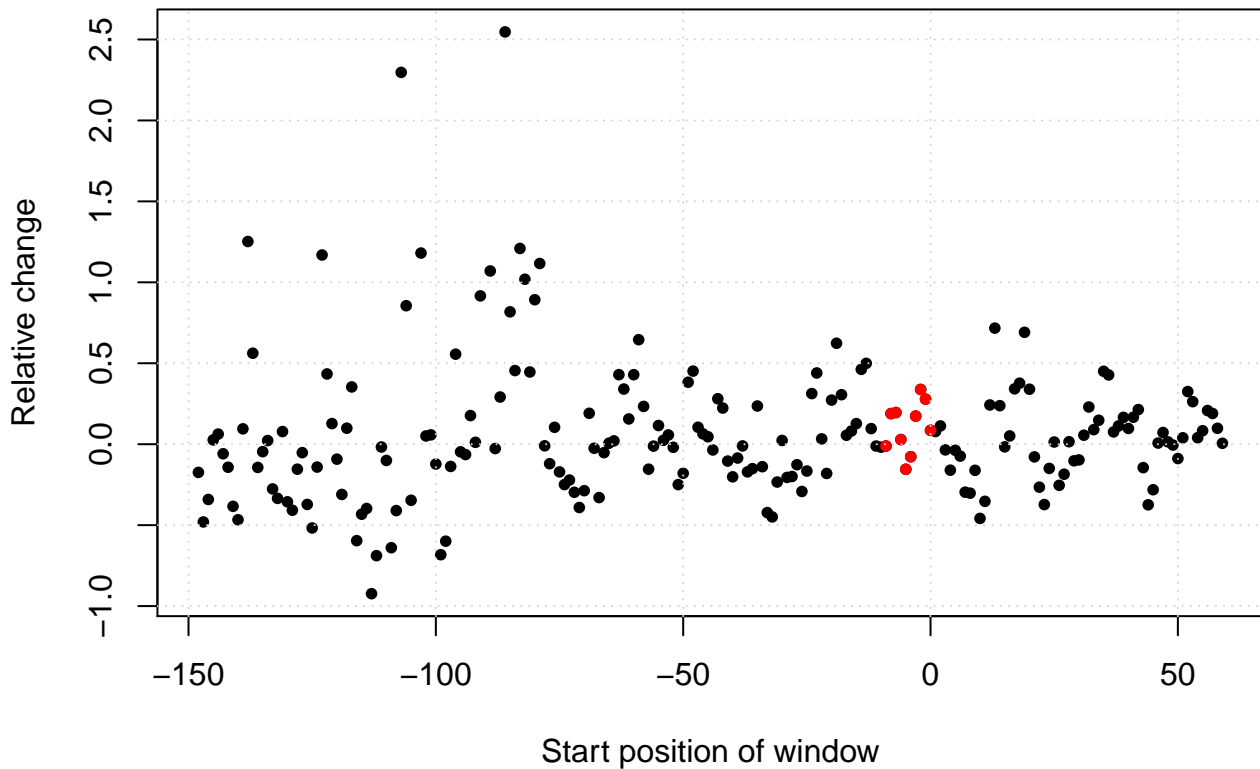

# P08A NFEV1FVC Window Size = 10

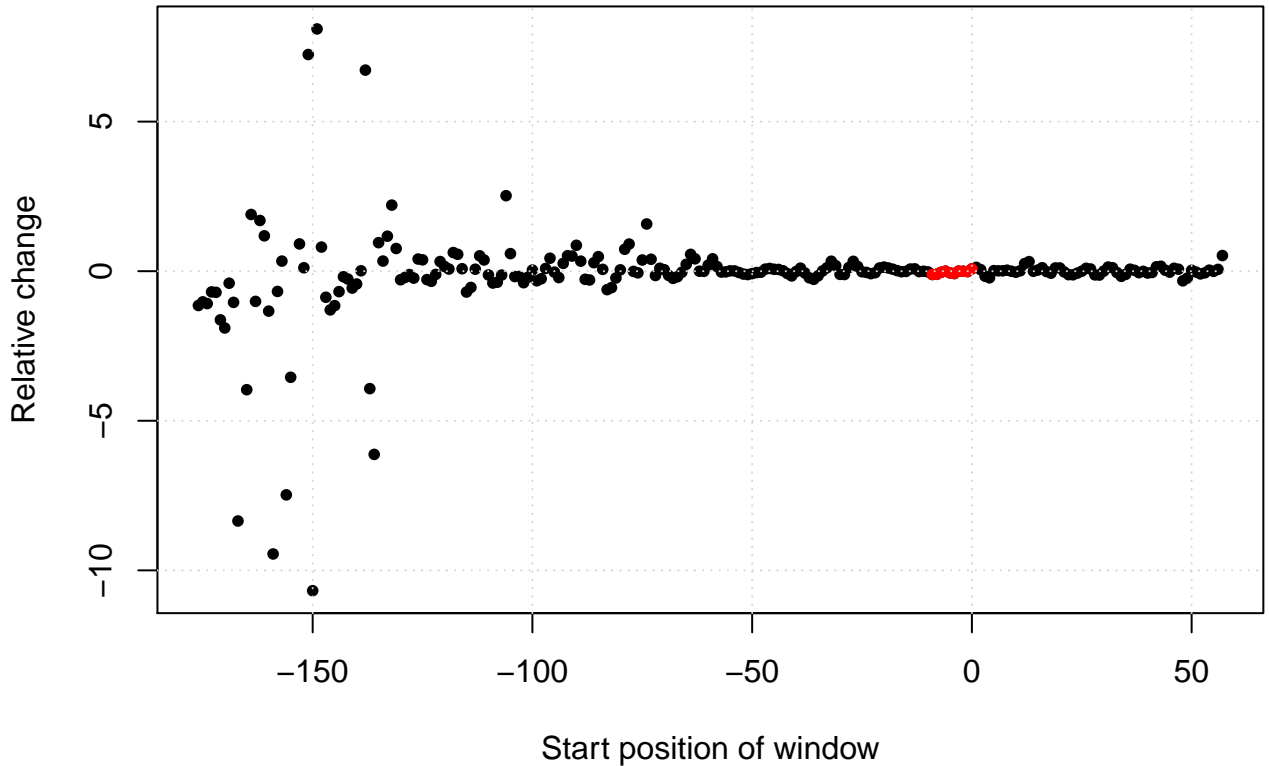

# P09A NFEV1FVC Window Size = 10

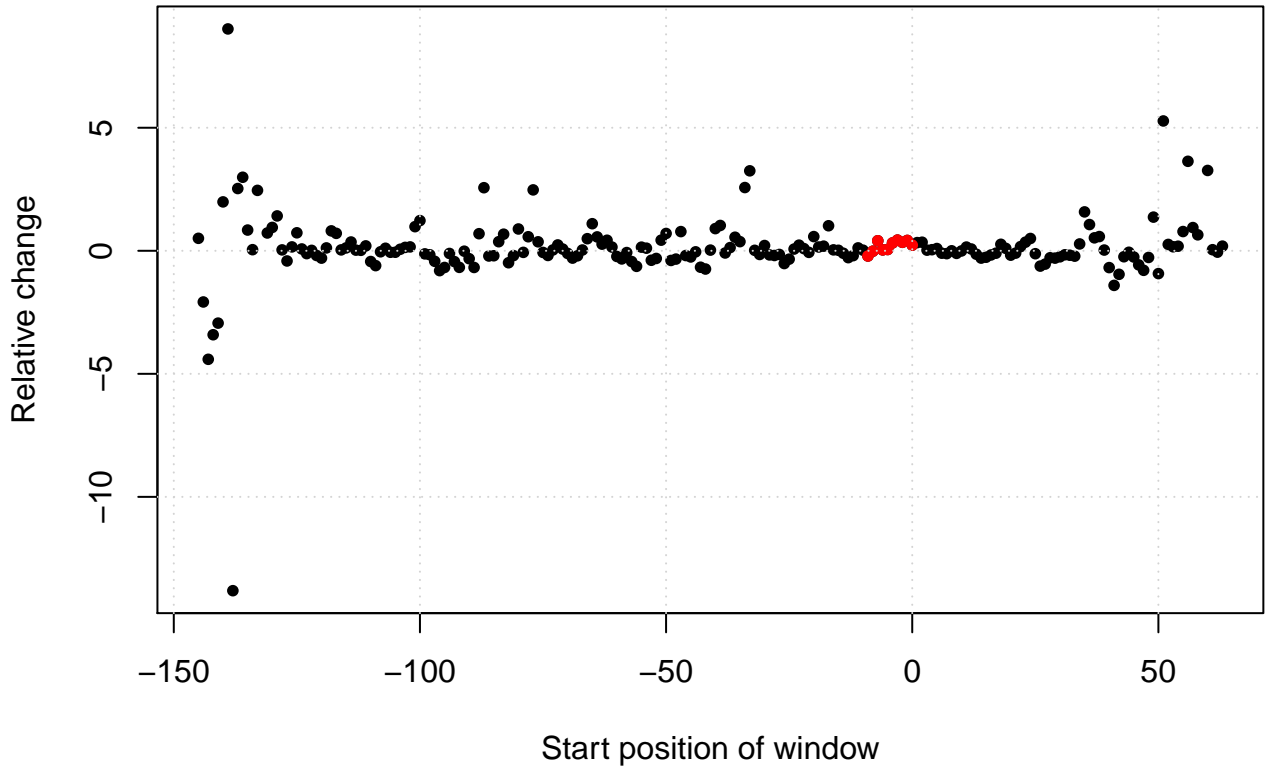

# P10A NFEV1FVC Window Size = 10

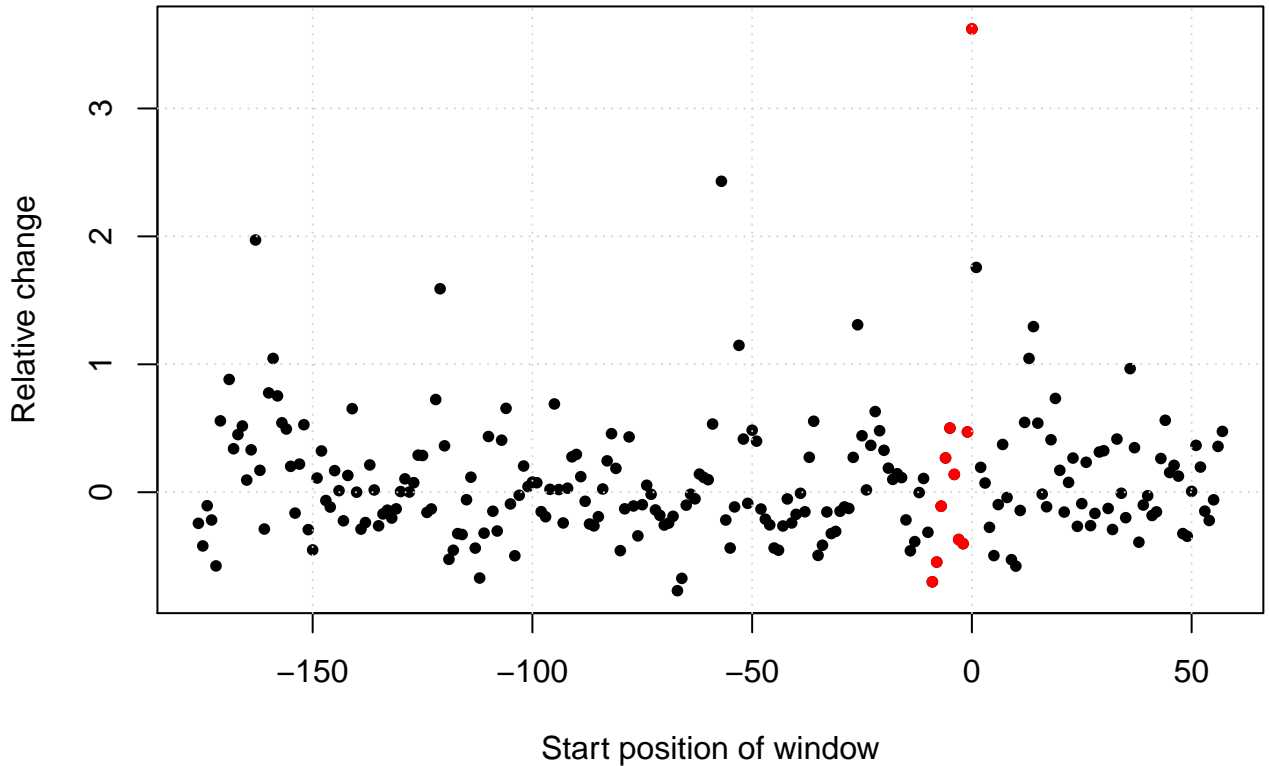

# P11A NFEV1FVC Window Size = 10

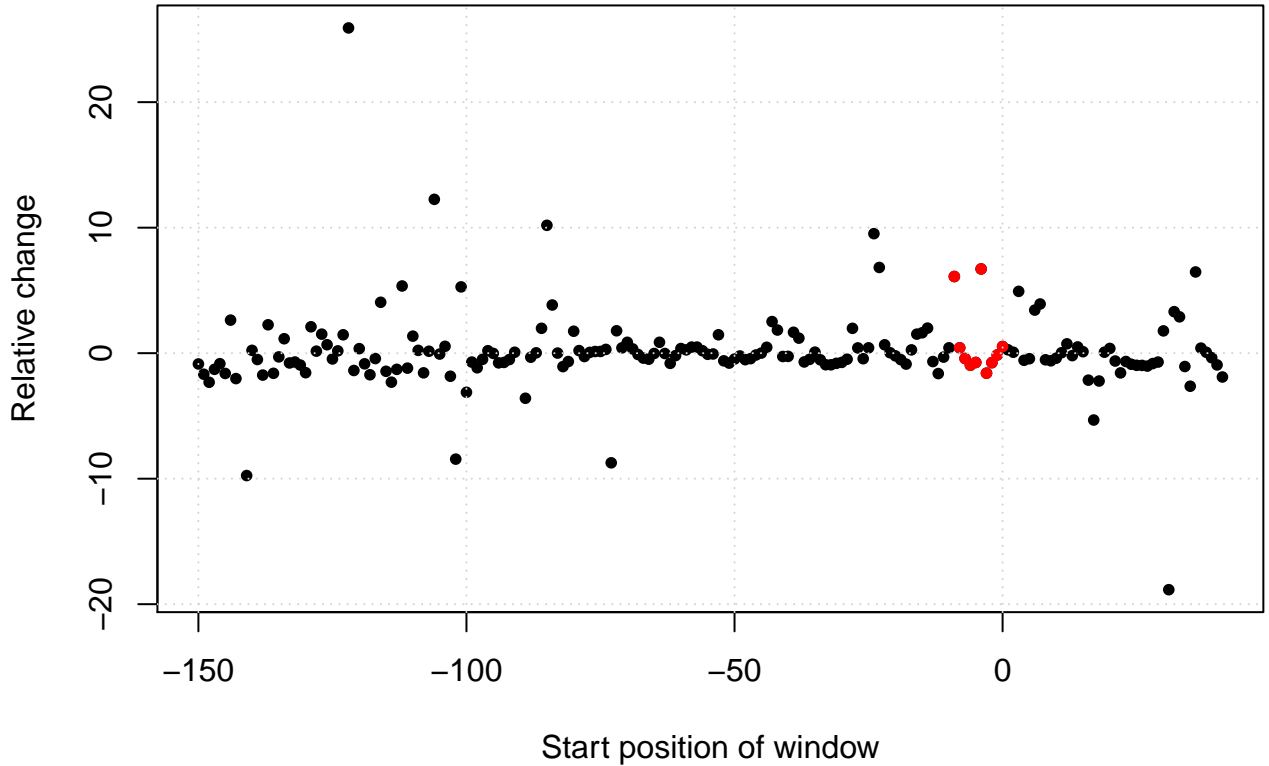

# P12A NFEV1FVC Window Size = 10

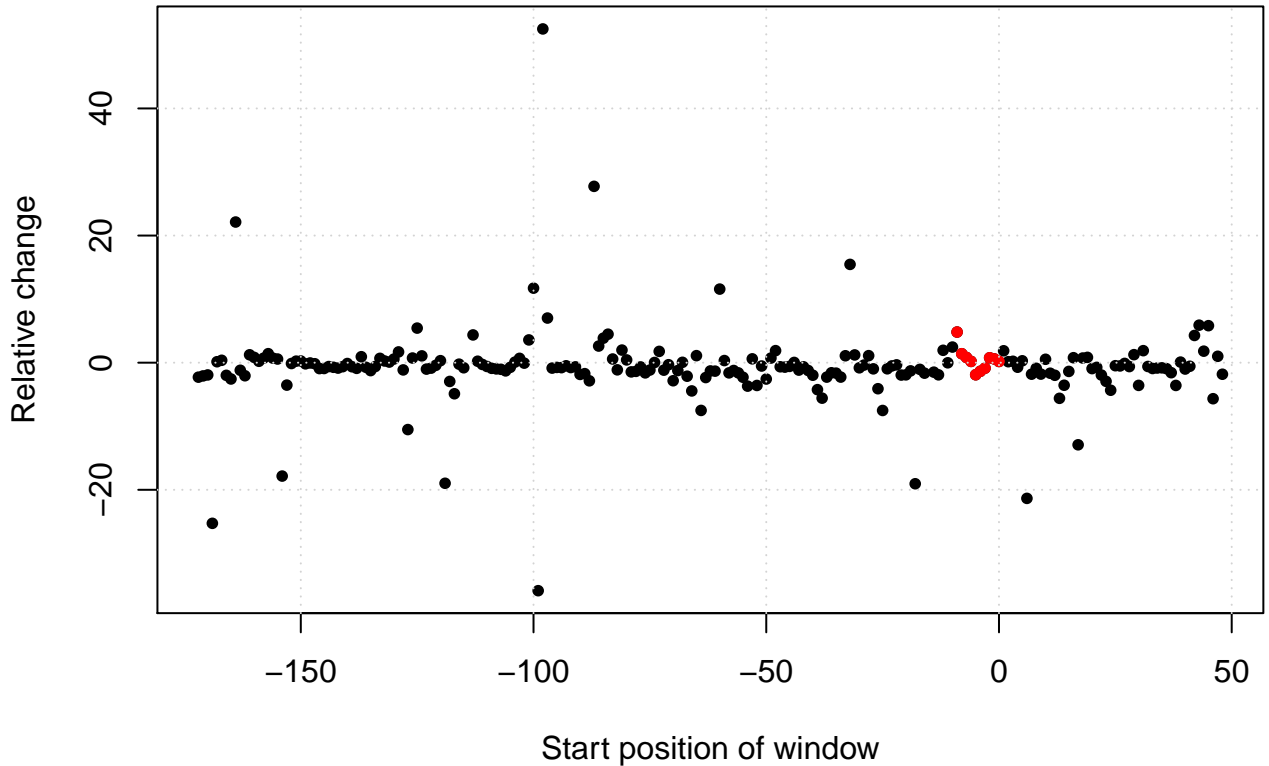



# P13A NFEV1FVC Window Size = 10

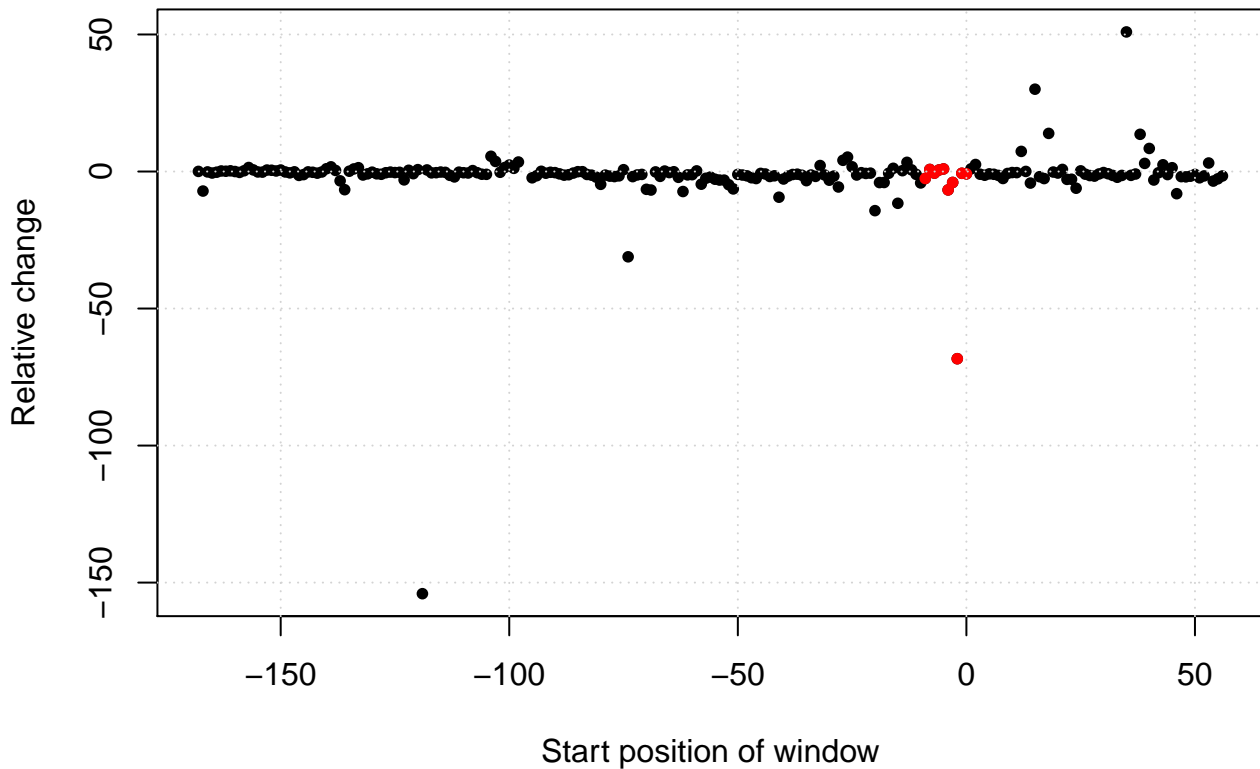

# P01H NFVC Window Size = 10

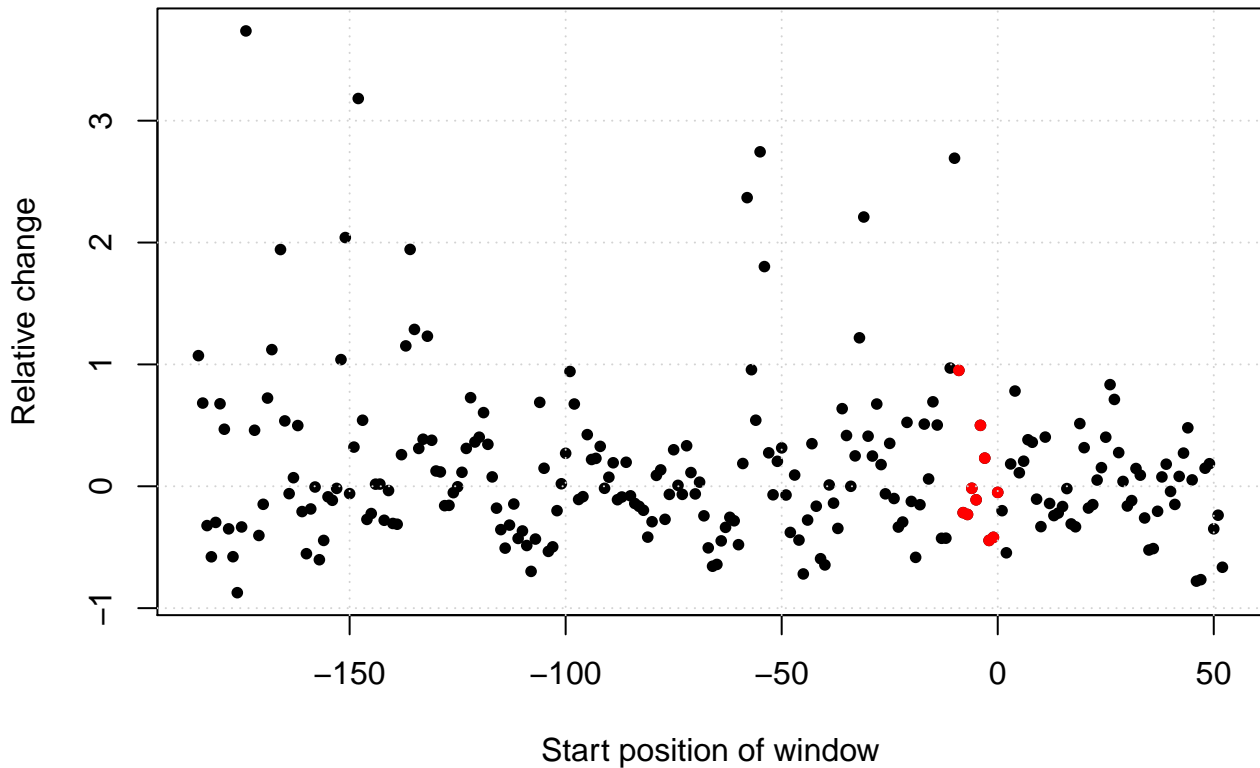

# P03H NFVC Window Size = 10

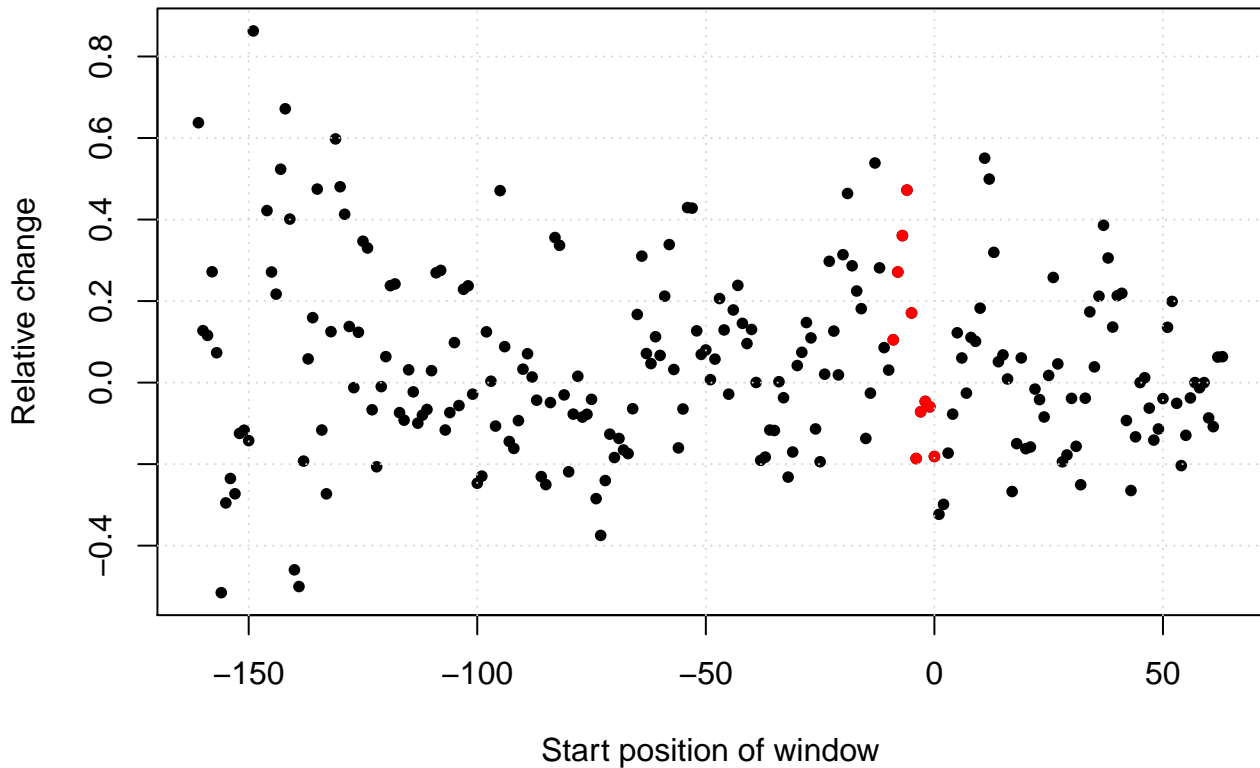

# P05H NFVC Window Size = 10

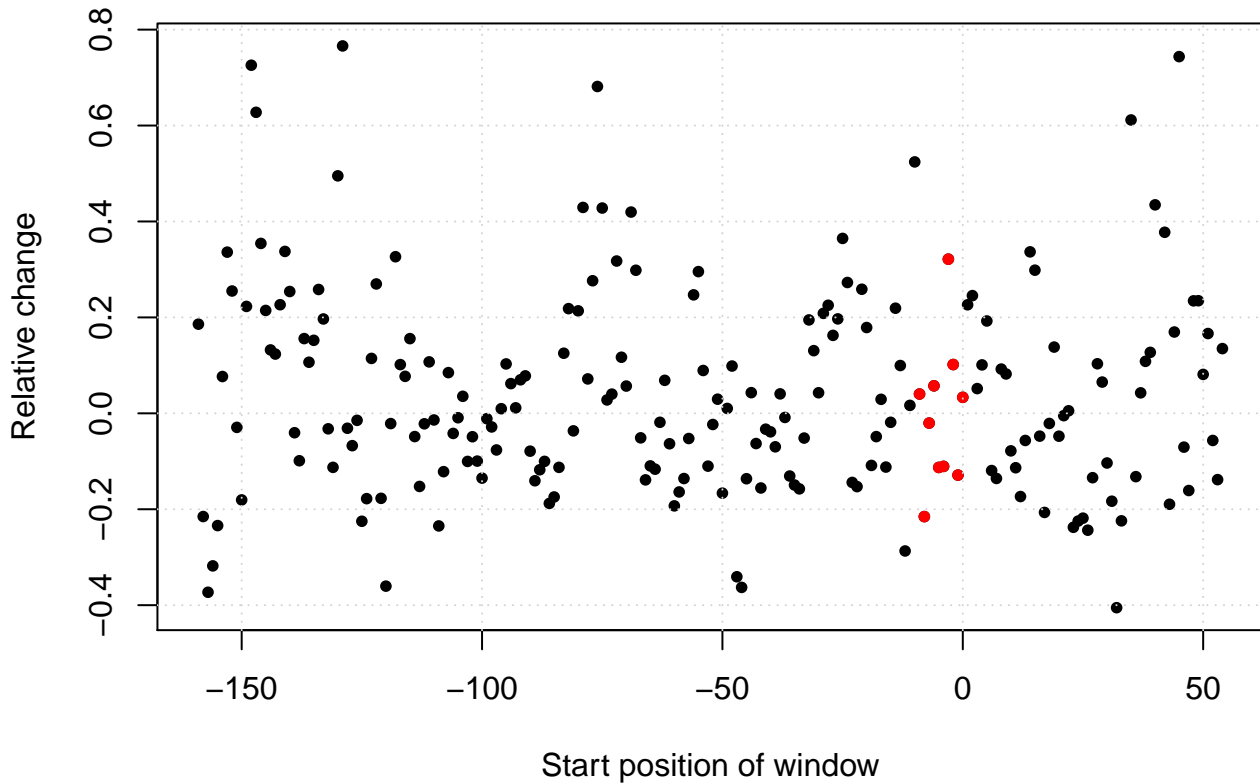

## P06H NFVC Window Size = 10

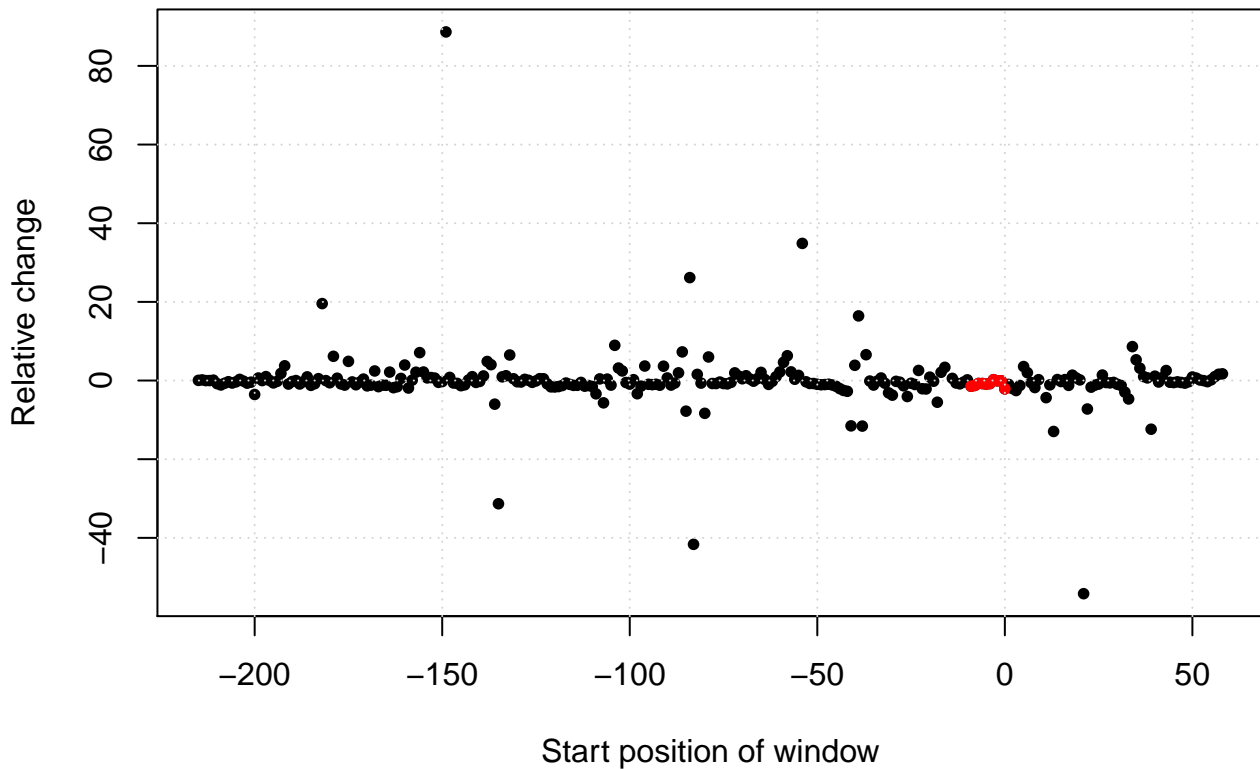

# P07H NFVC Window Size = 10

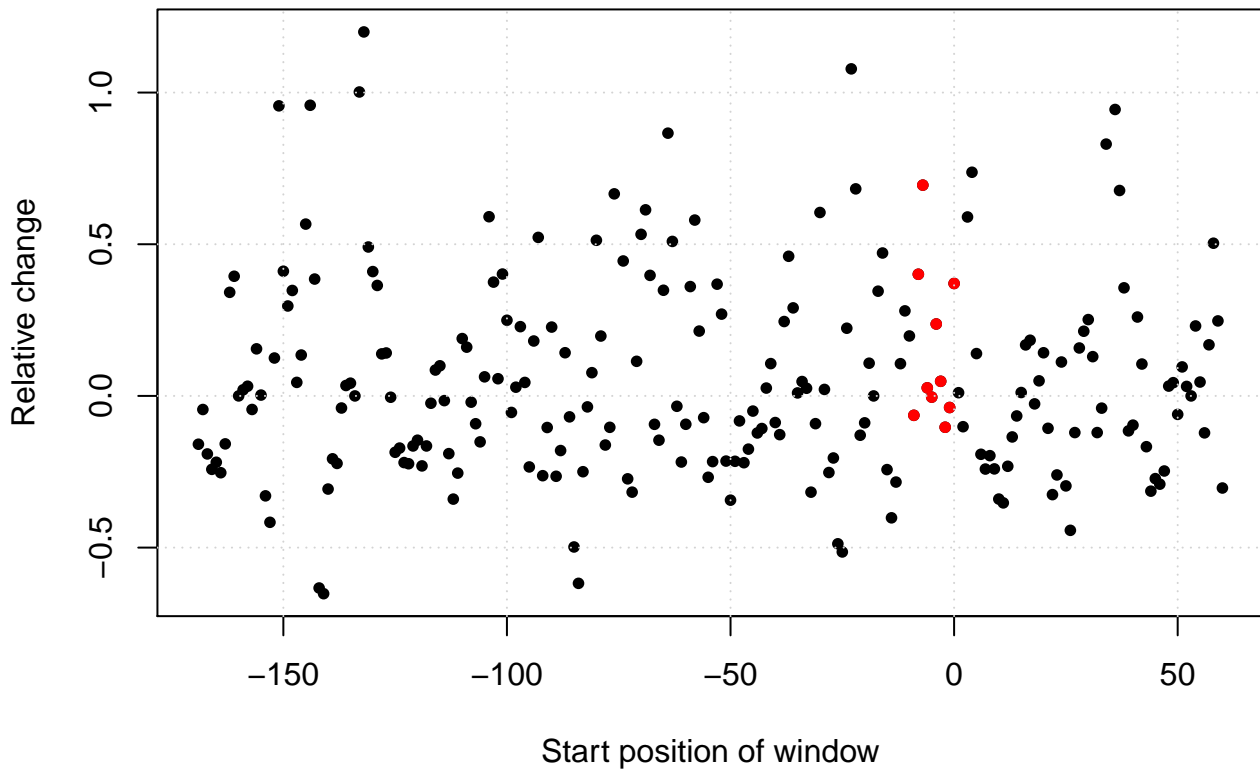

# P08H NFVC Window Size = 10

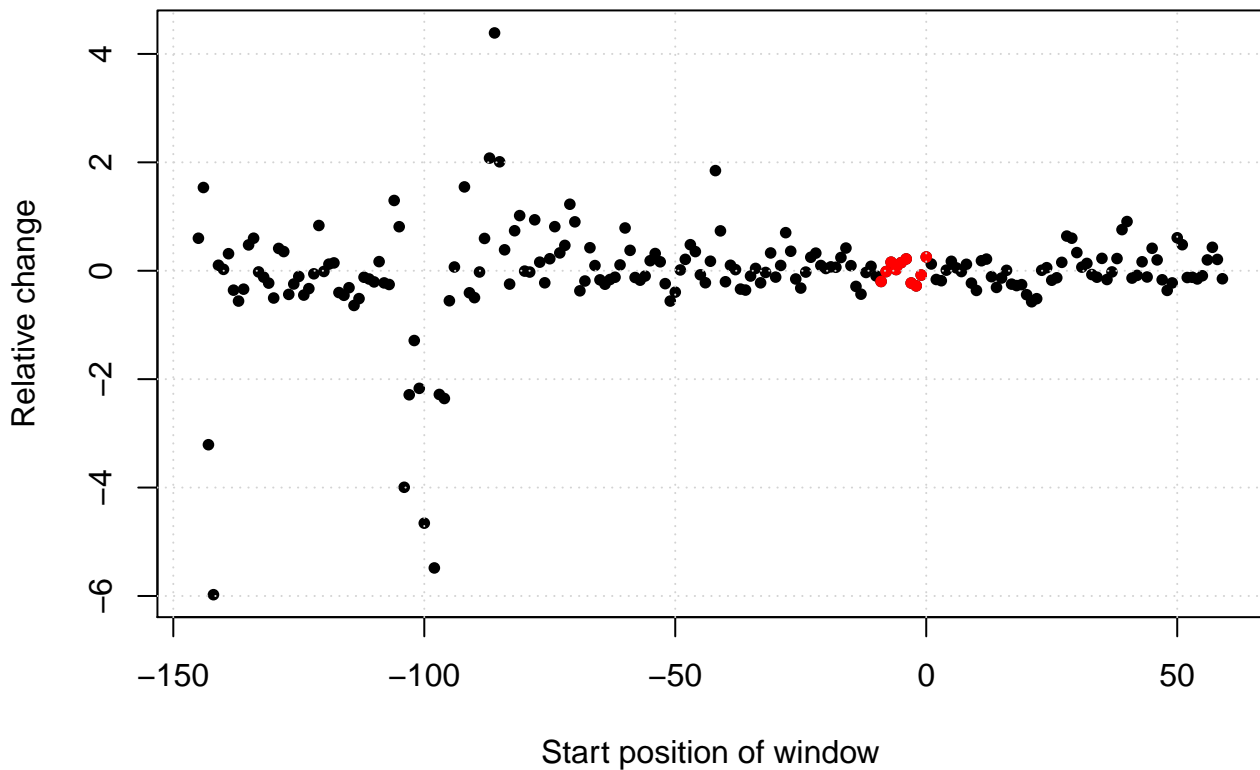

## P09H NFVC Window Size = 10

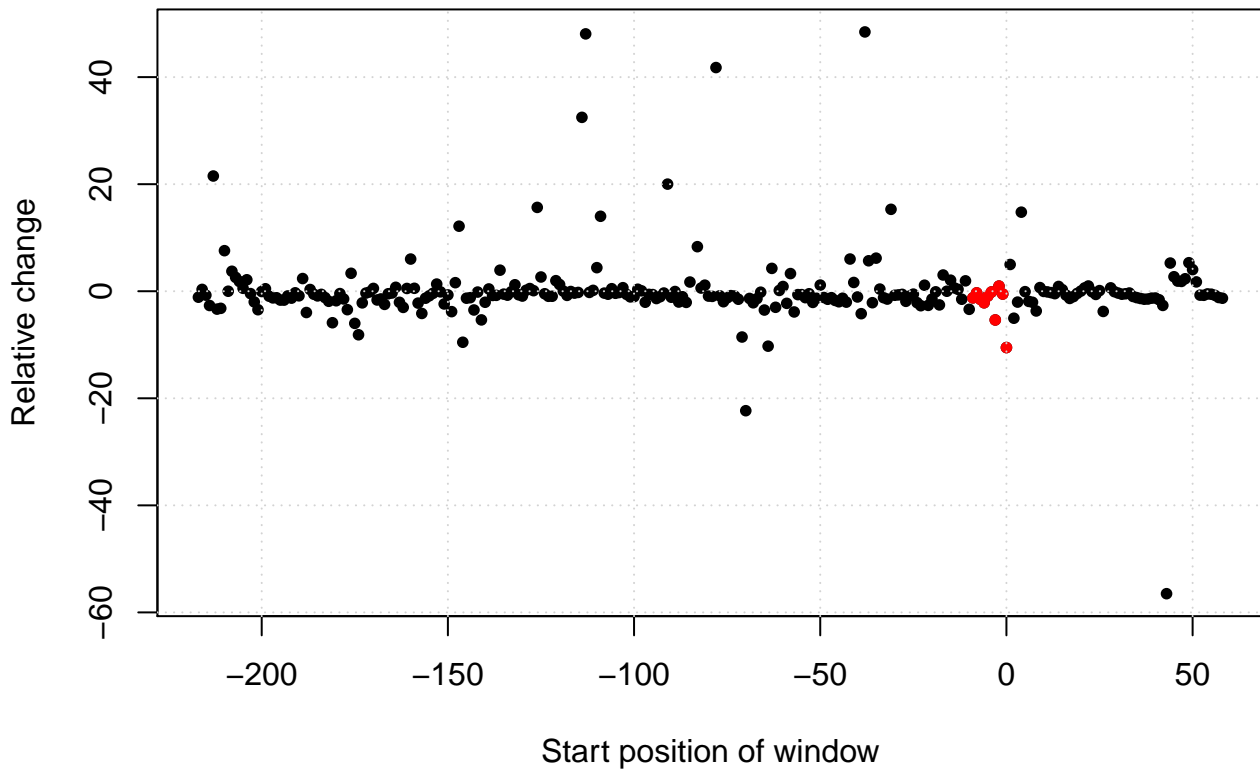



# P11H NFVC Window Size = 10

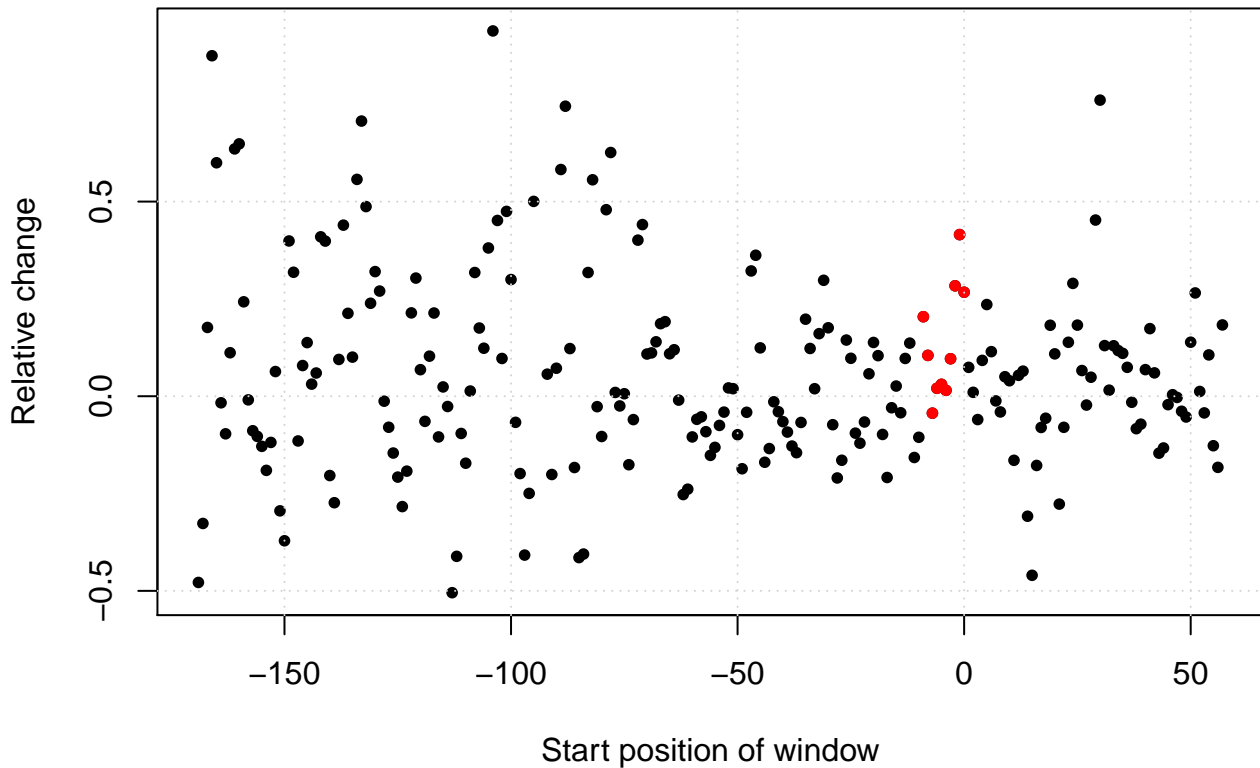

## P12H NFVC Window Size = 10

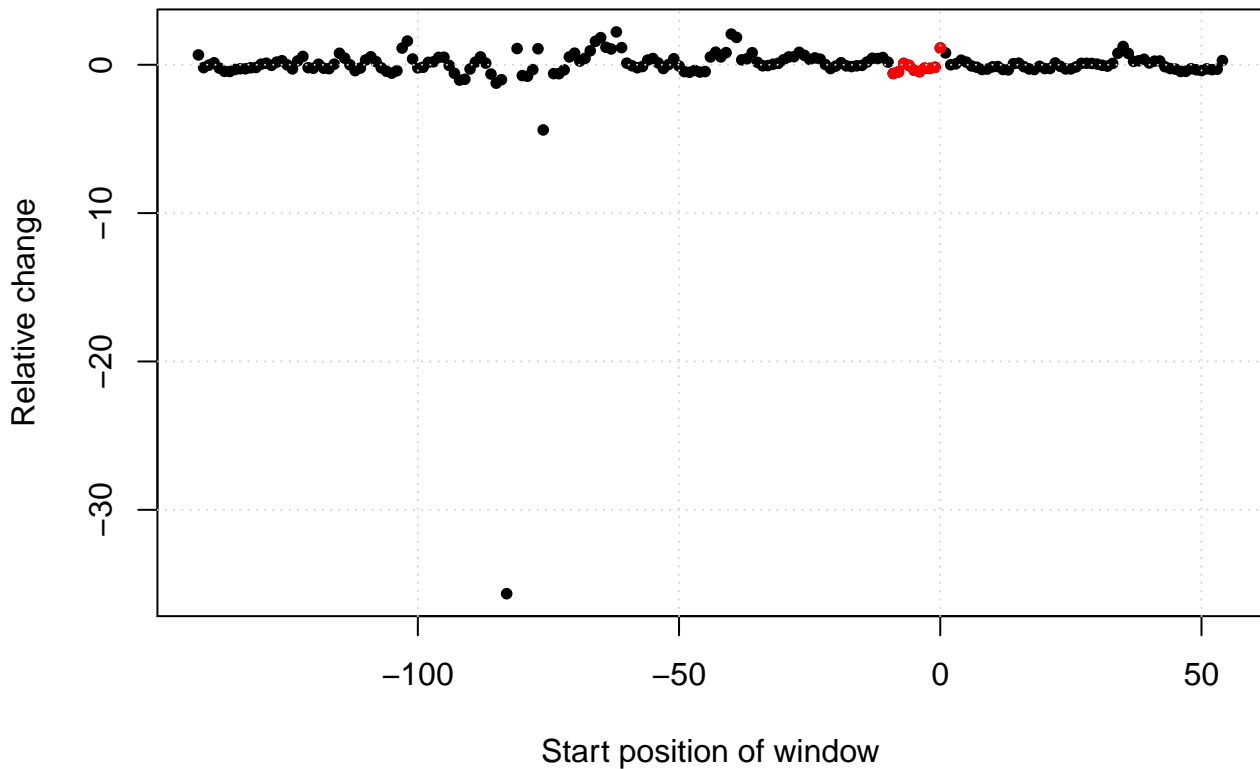

# P13H NFVC Window Size = 10

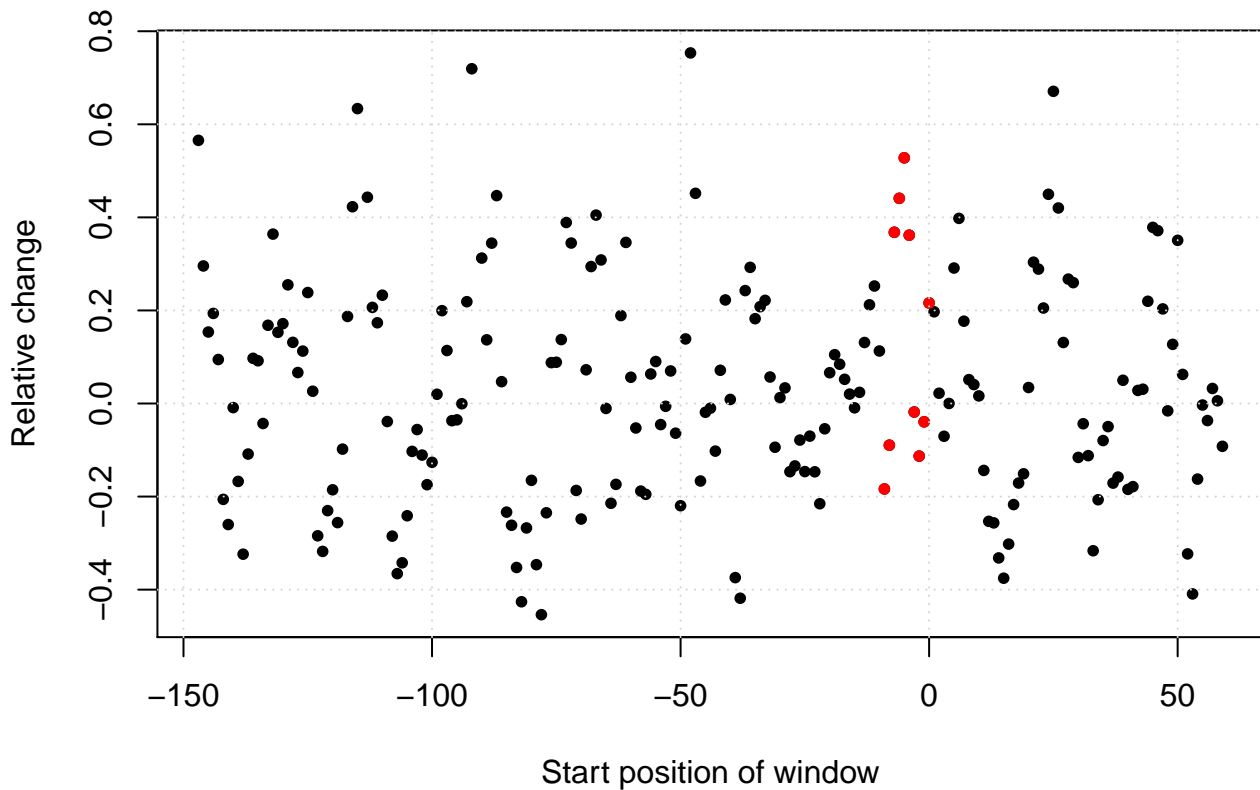

## P14H NFVC Window Size = 10

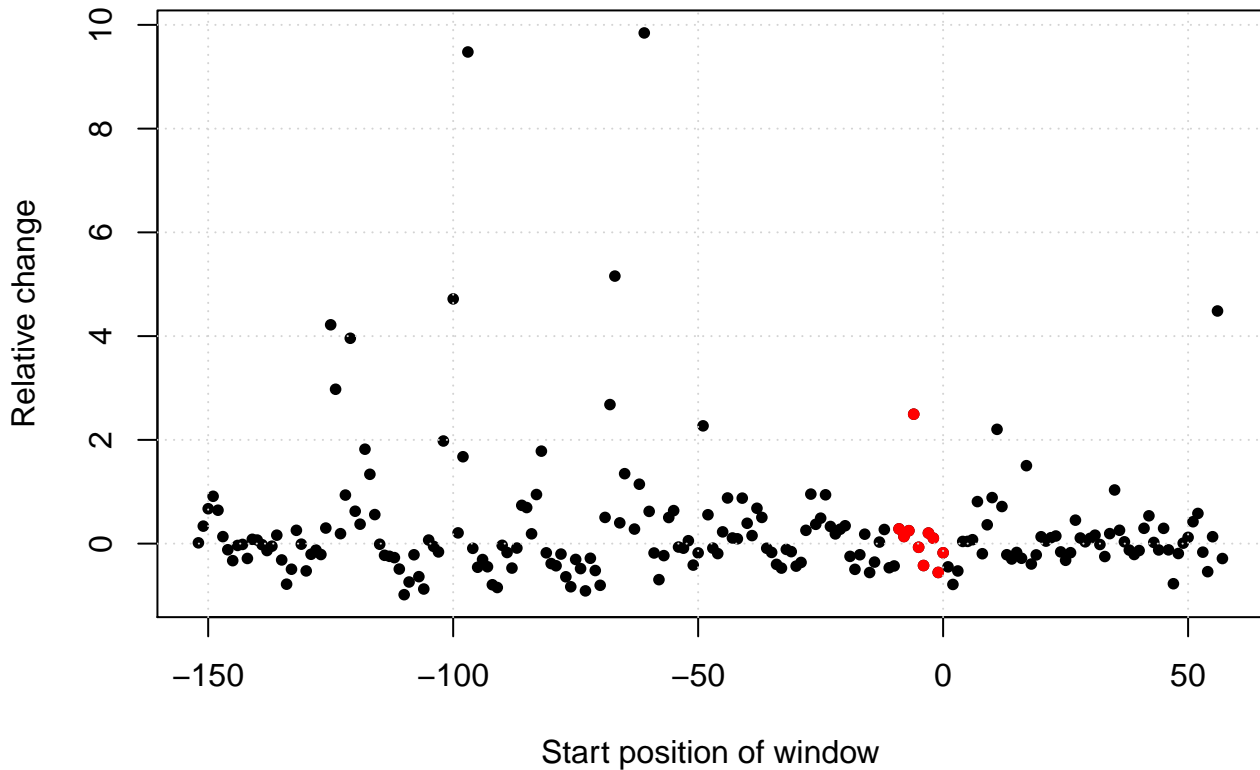

# P15H NFVC Window Size = 10

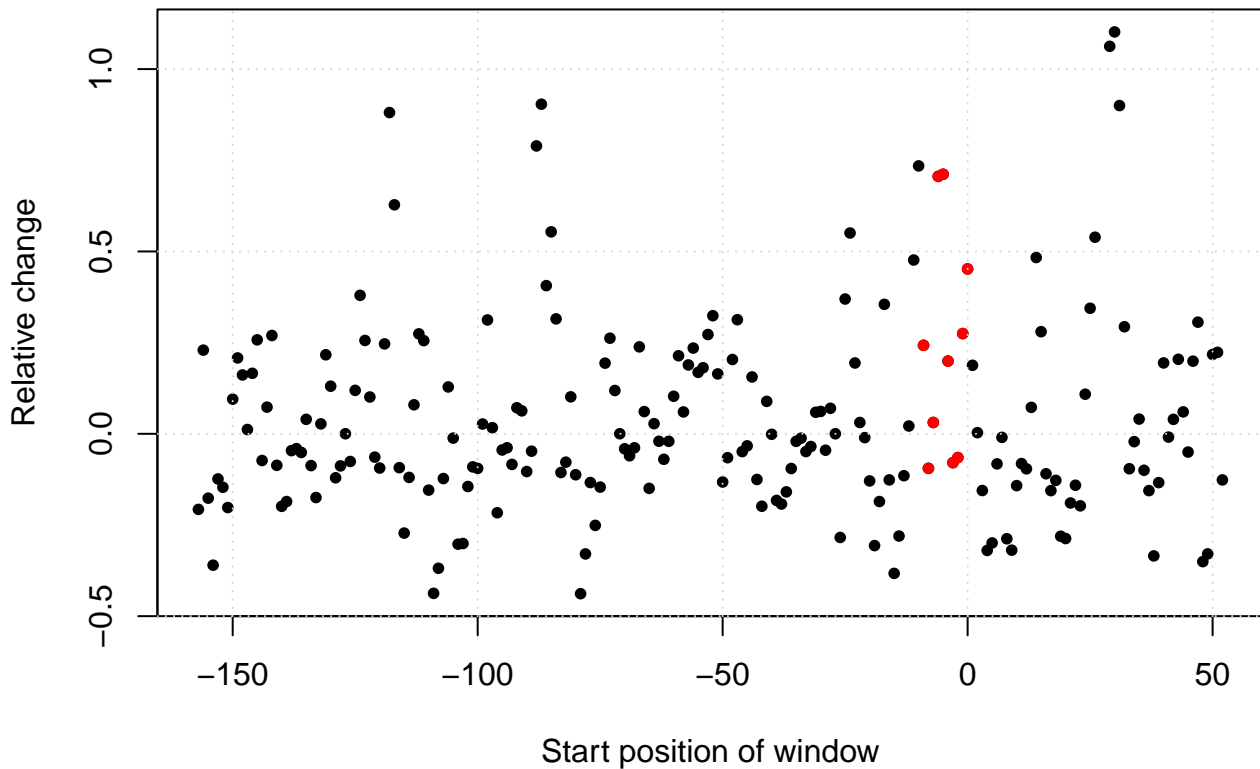

# P01A NFVC Window Size = 10

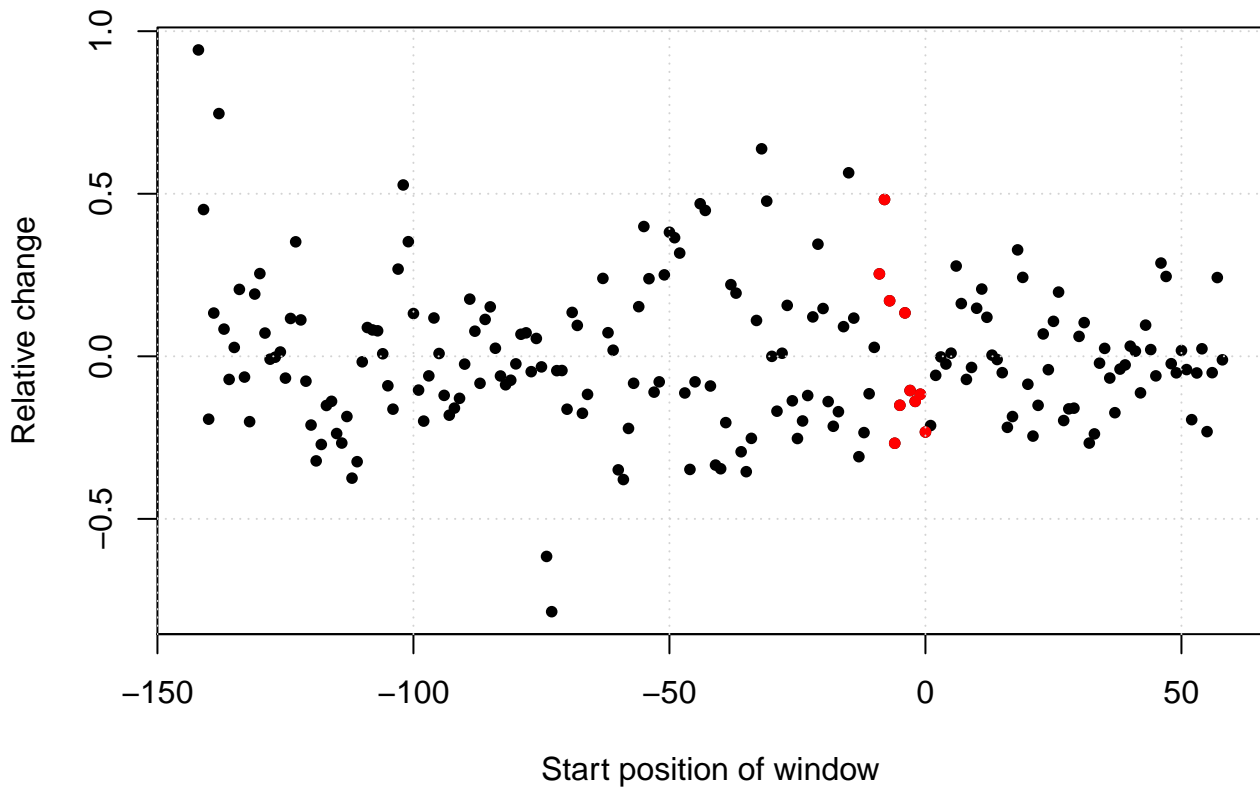

## P02A NFVC Window Size = 10

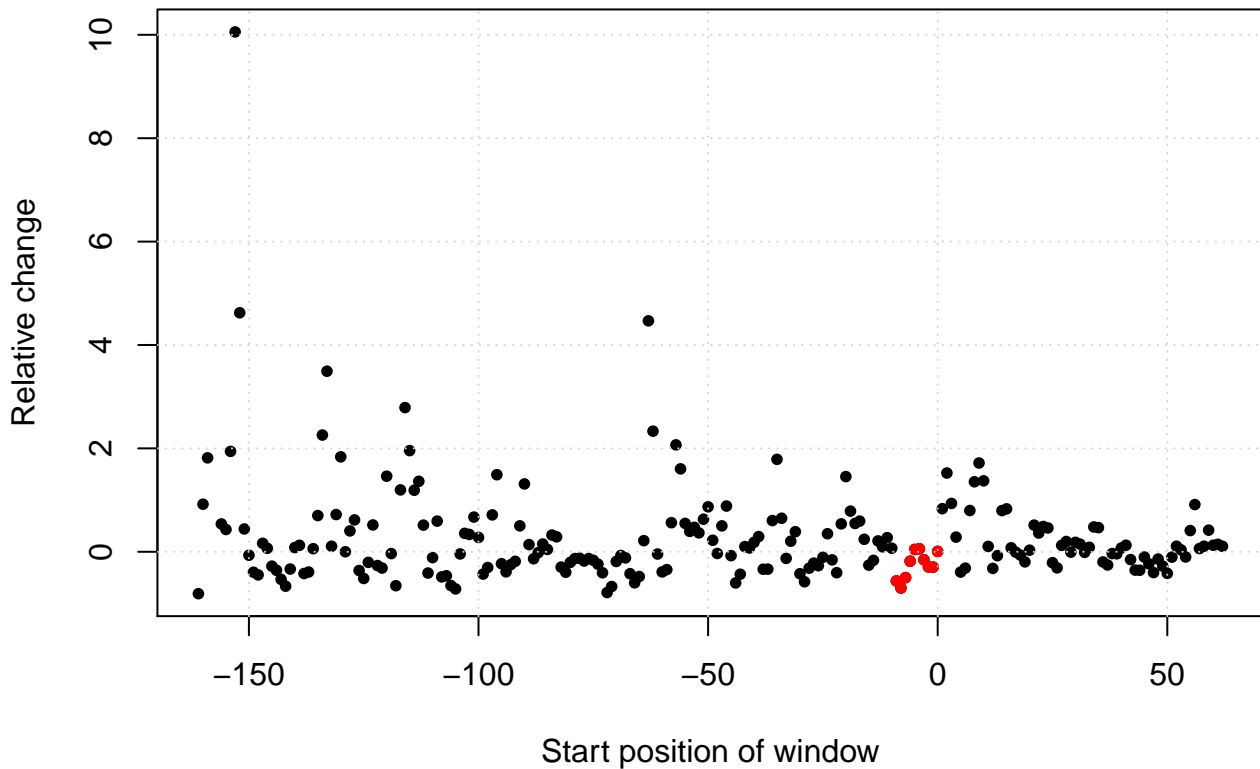

# P04A NFVC Window Size = 10

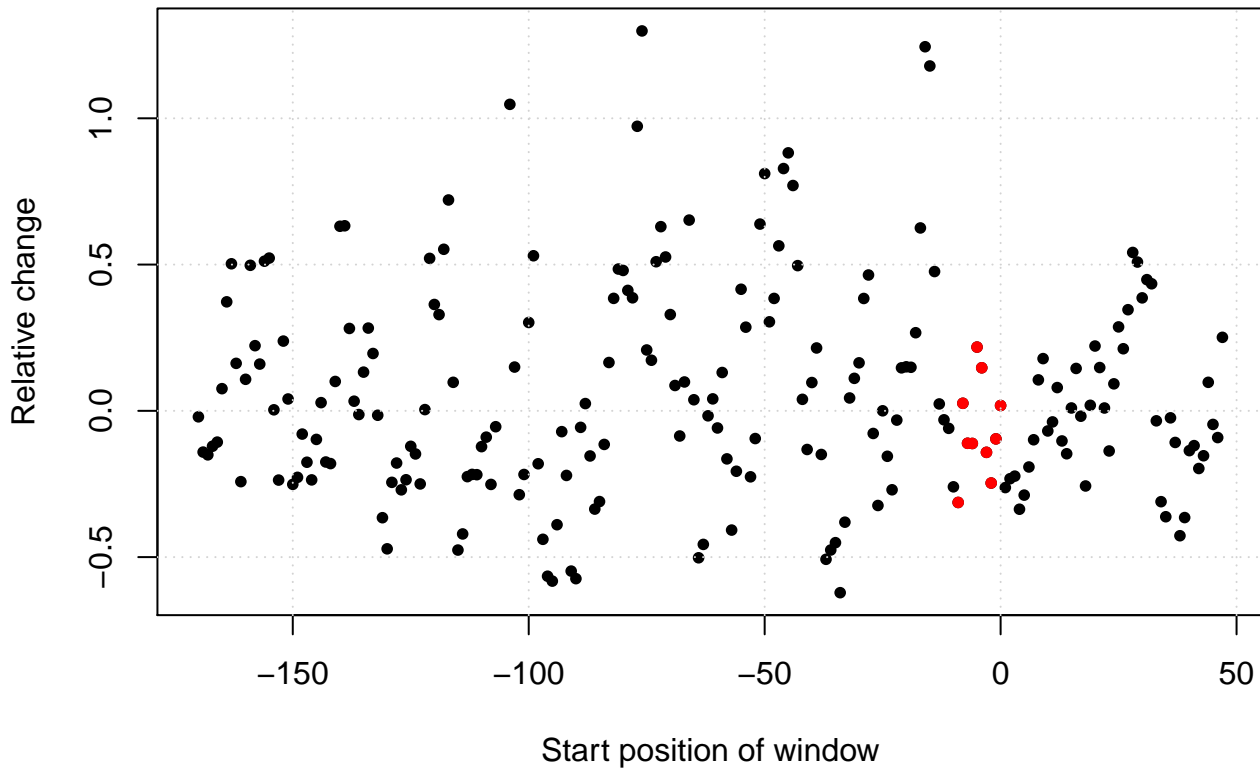



## P05A NFVC Window Size = 10

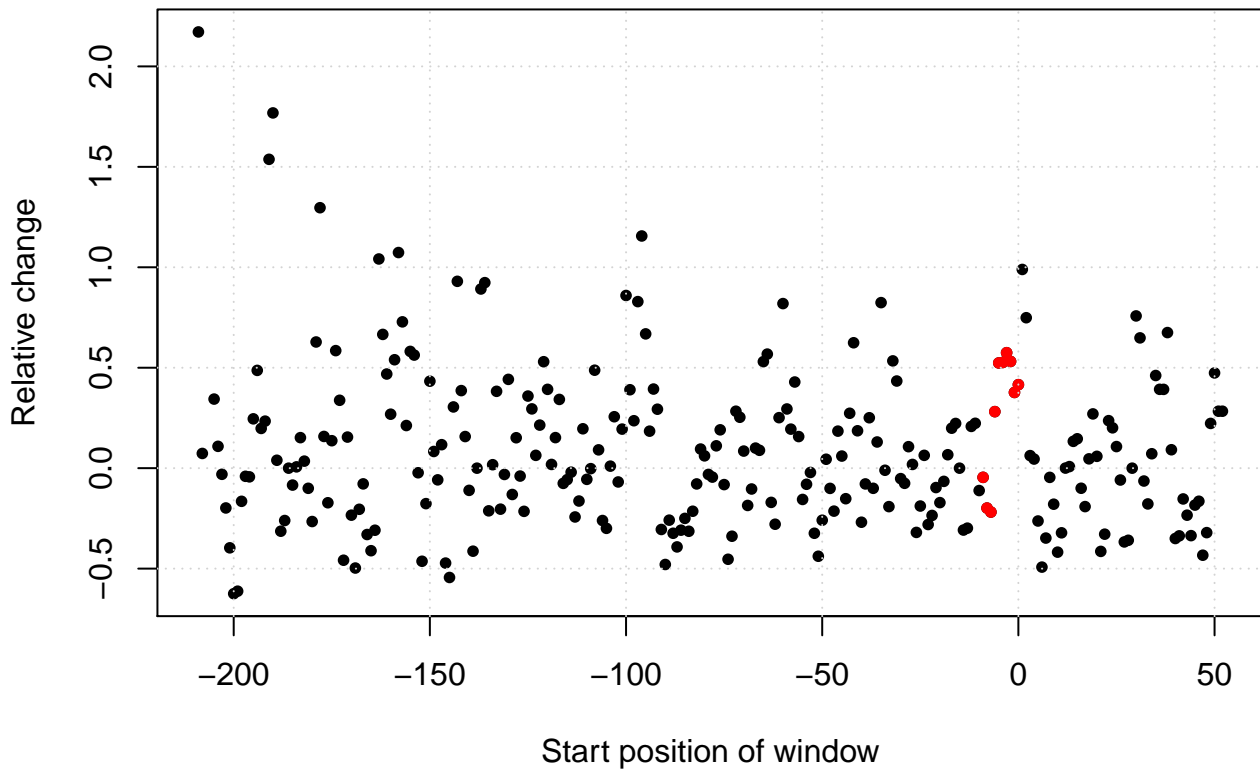

# P06A NFVC Window Size = 10

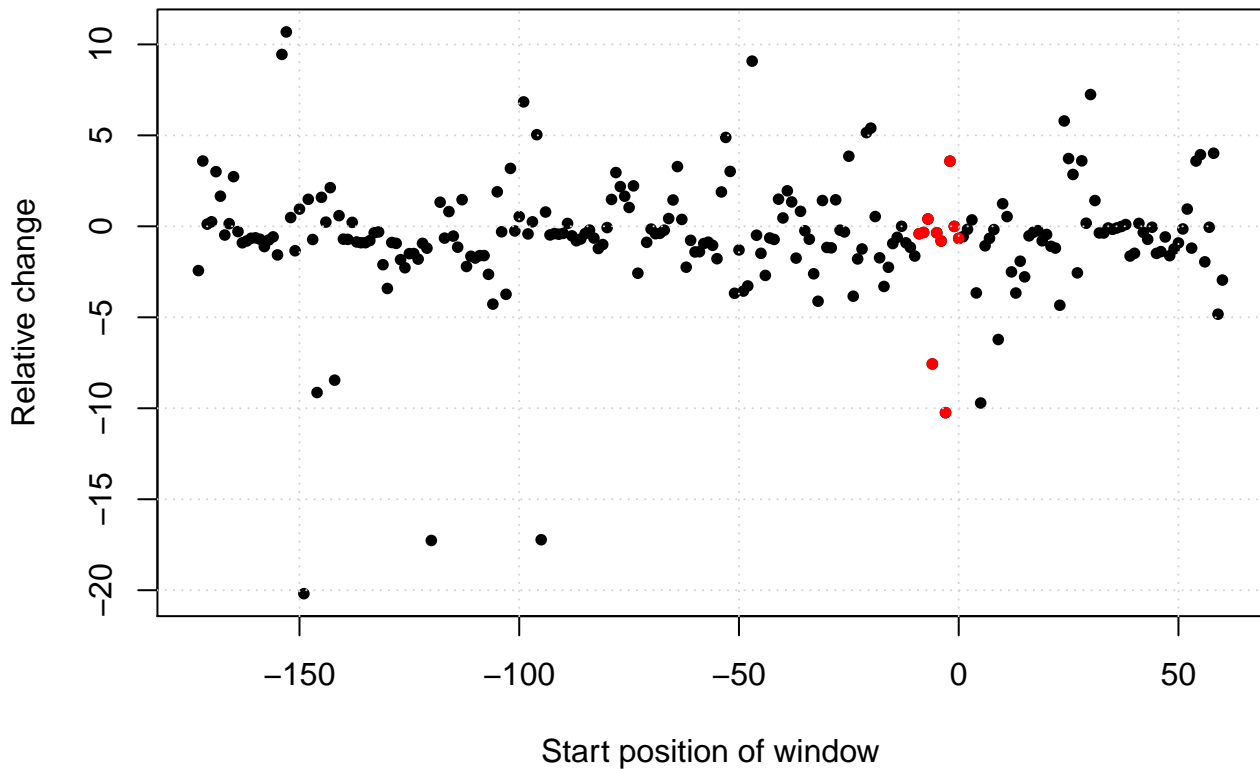

# P07A NFVC Window Size = 10

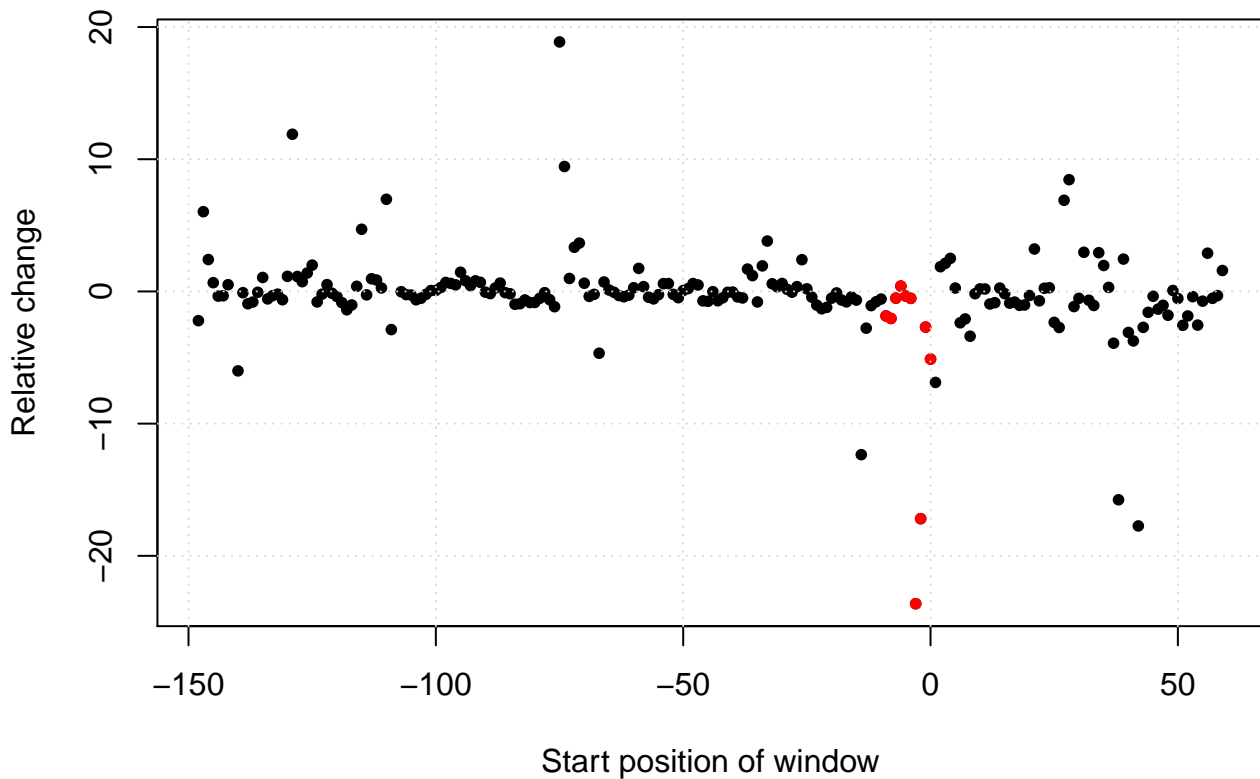

## P08A NFVC Window Size = 10

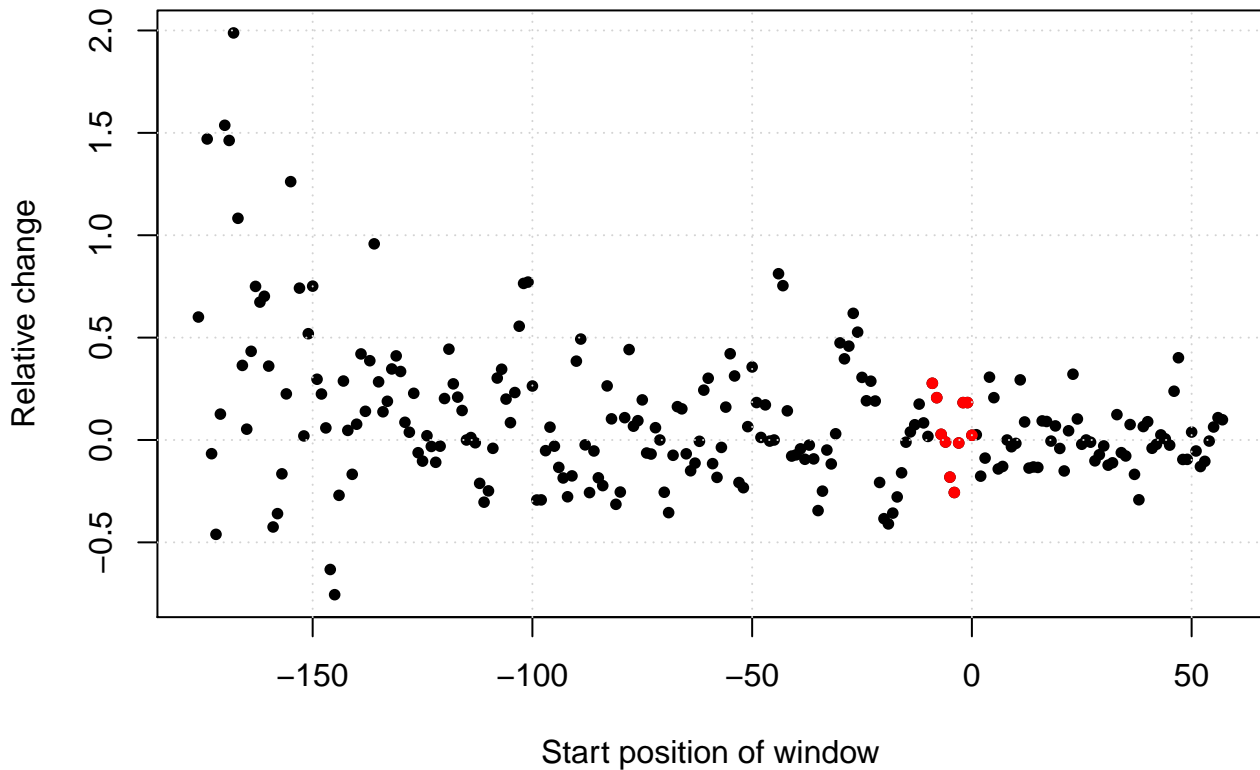

# P09A NFVC Window Size = 10

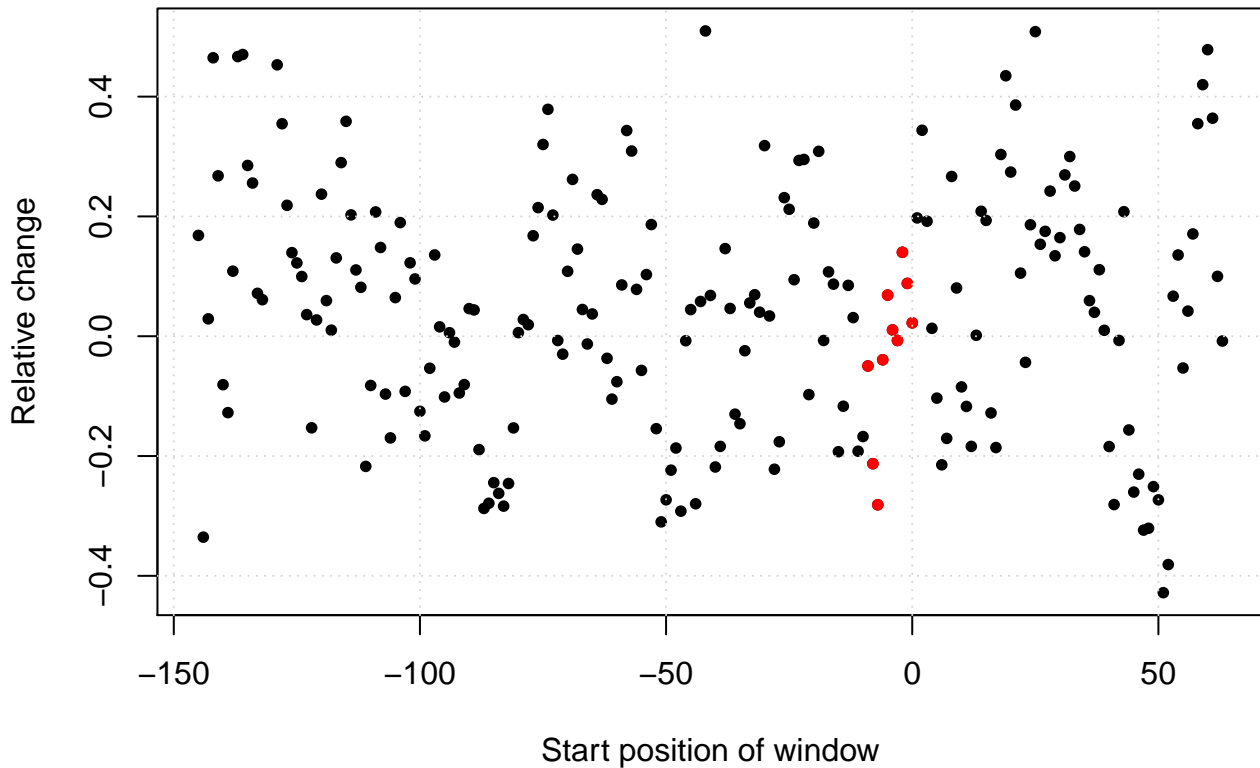

# P10A NFVC Window Size = 10

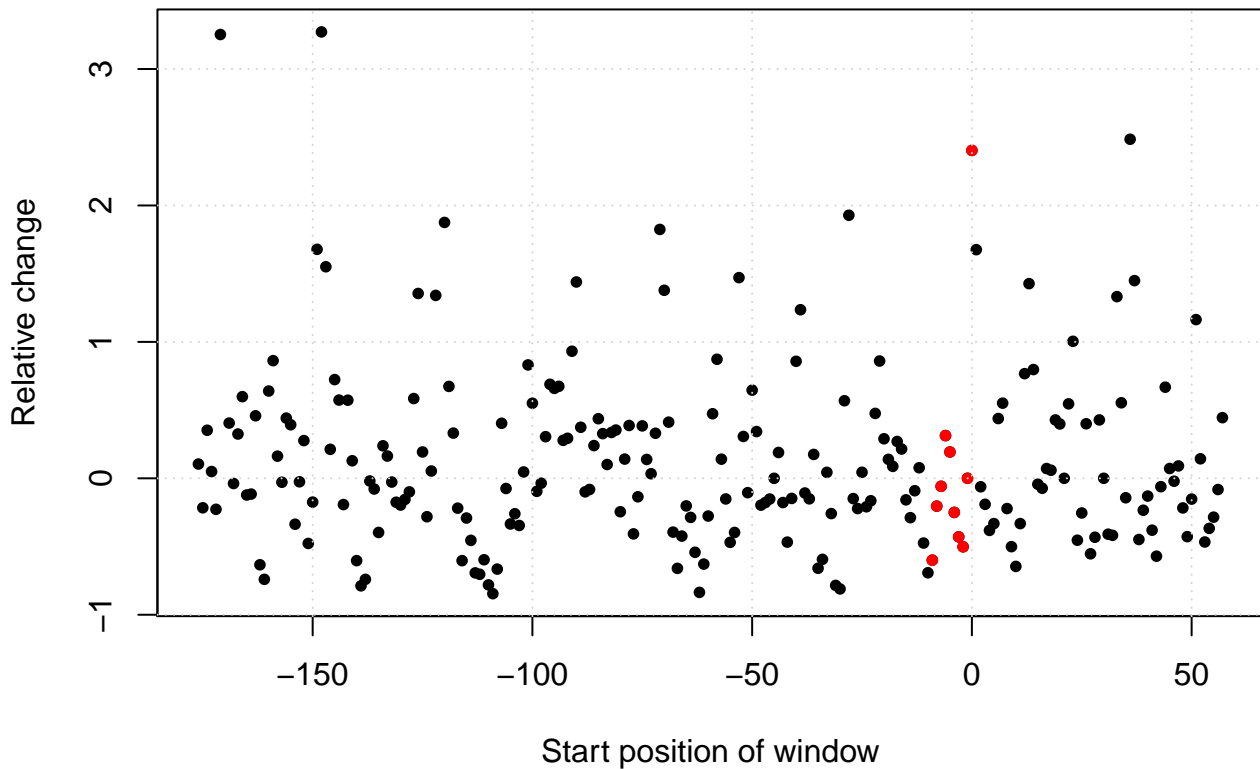

# P11A NFVC Window Size = 10

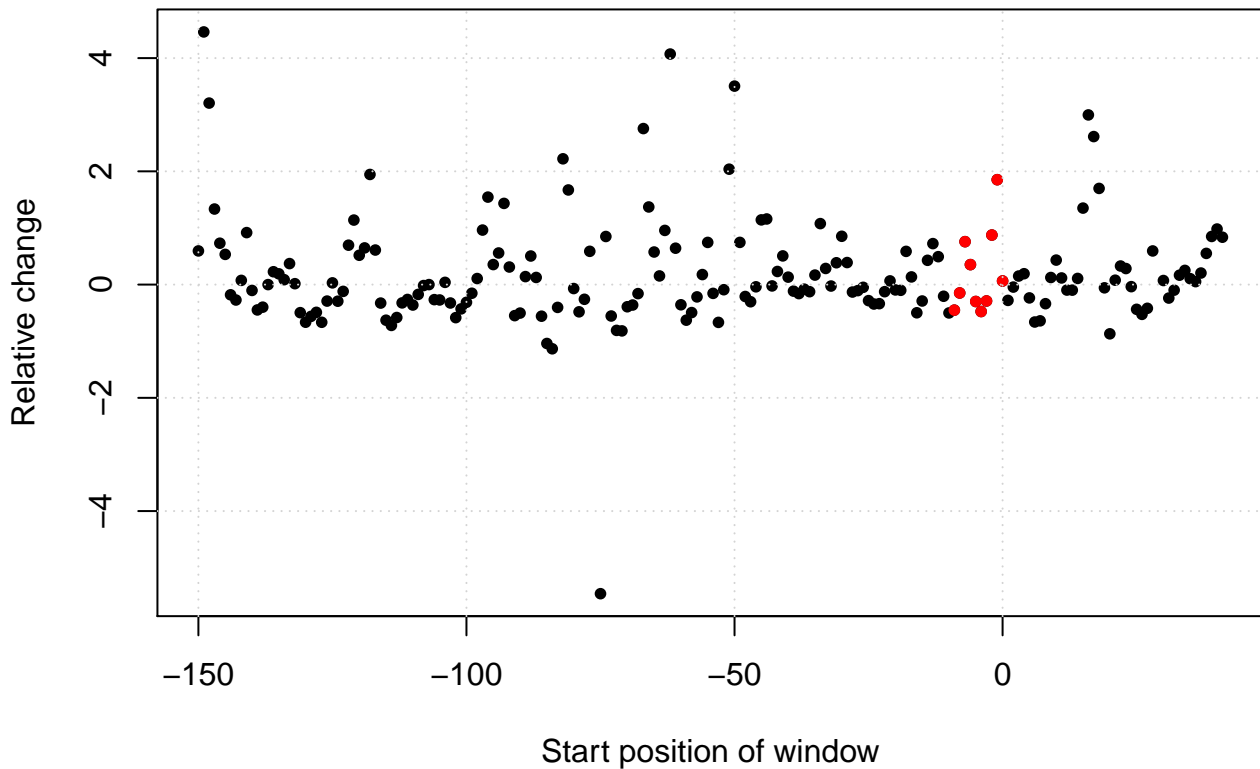

## P12A NFVC Window Size = 10

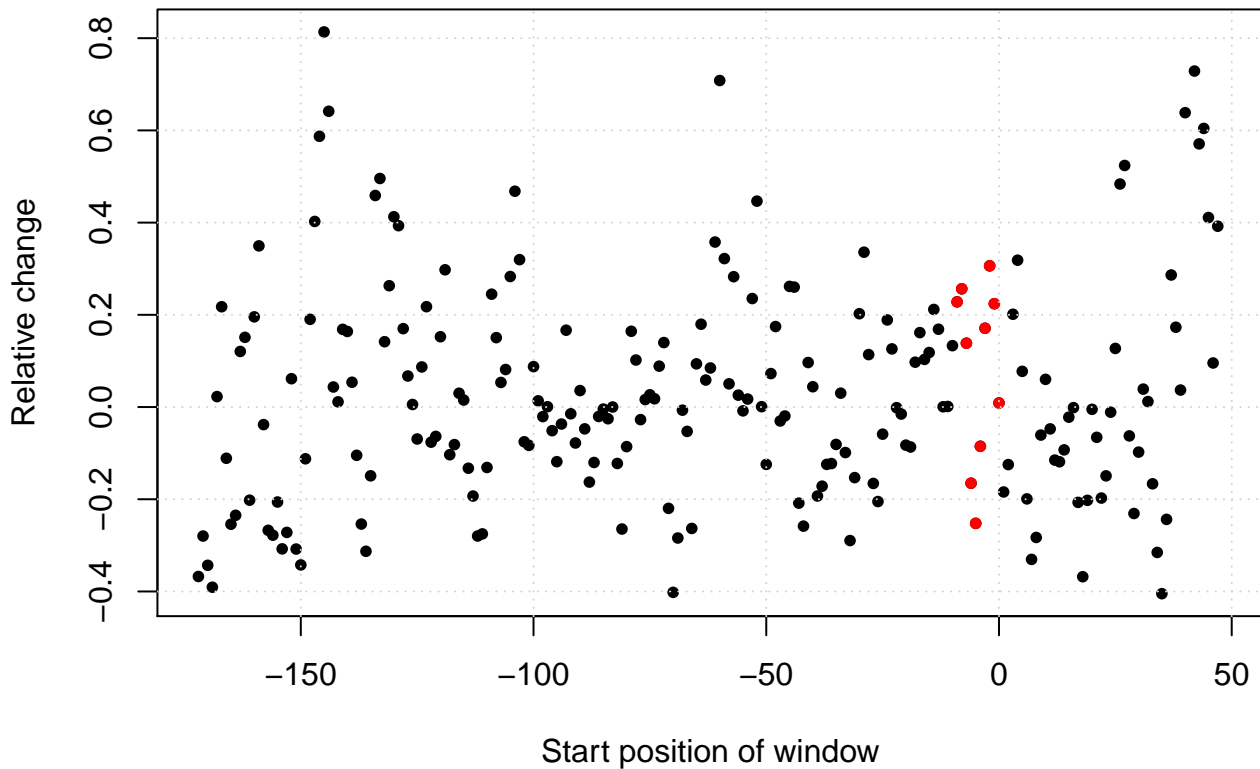



## P13A NFVC Window Size = 10

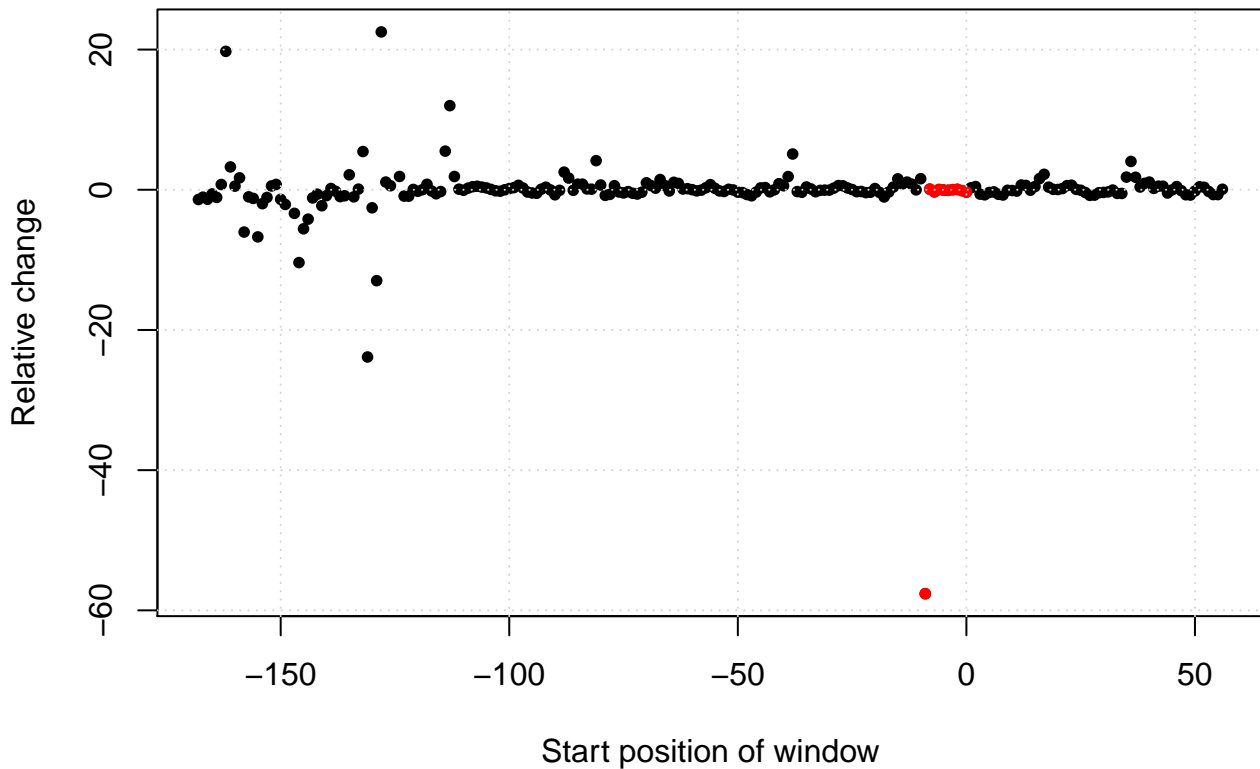

**P01H PEFpercentPred Window Size = 10**

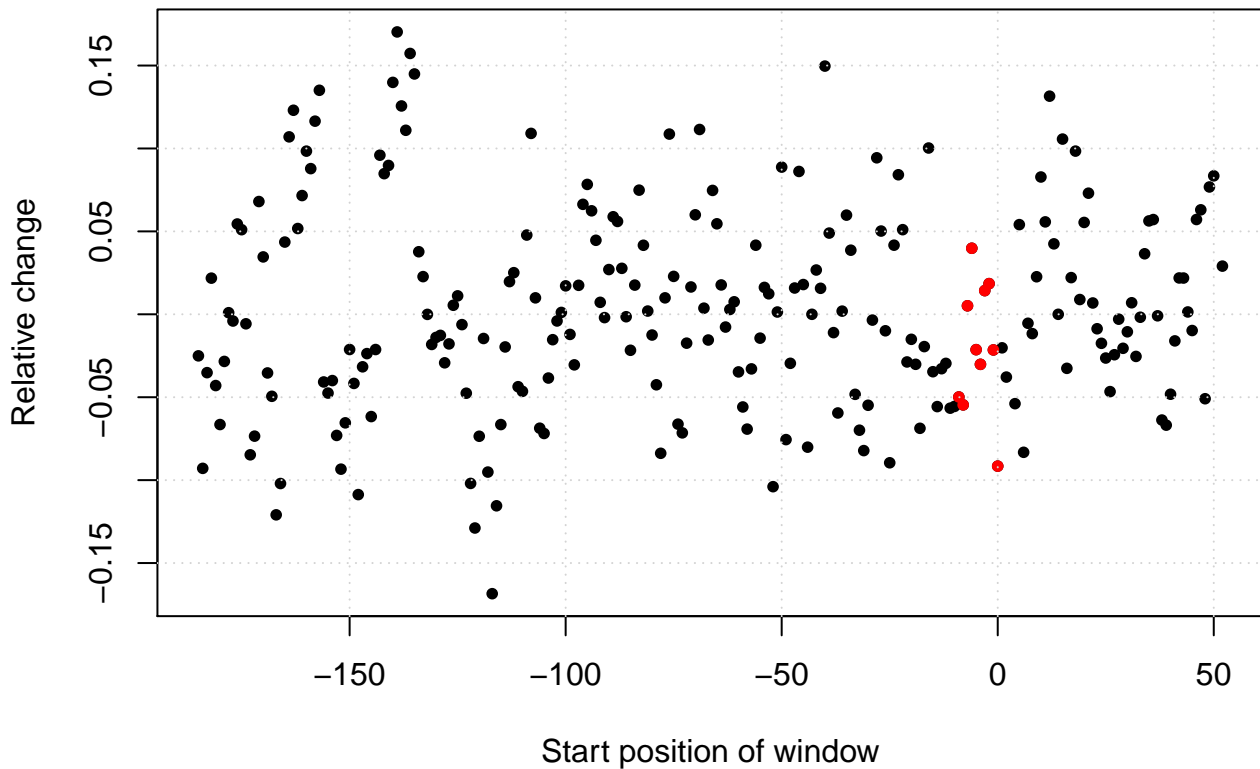

# P03H PEFpercentPred Window Size = 10

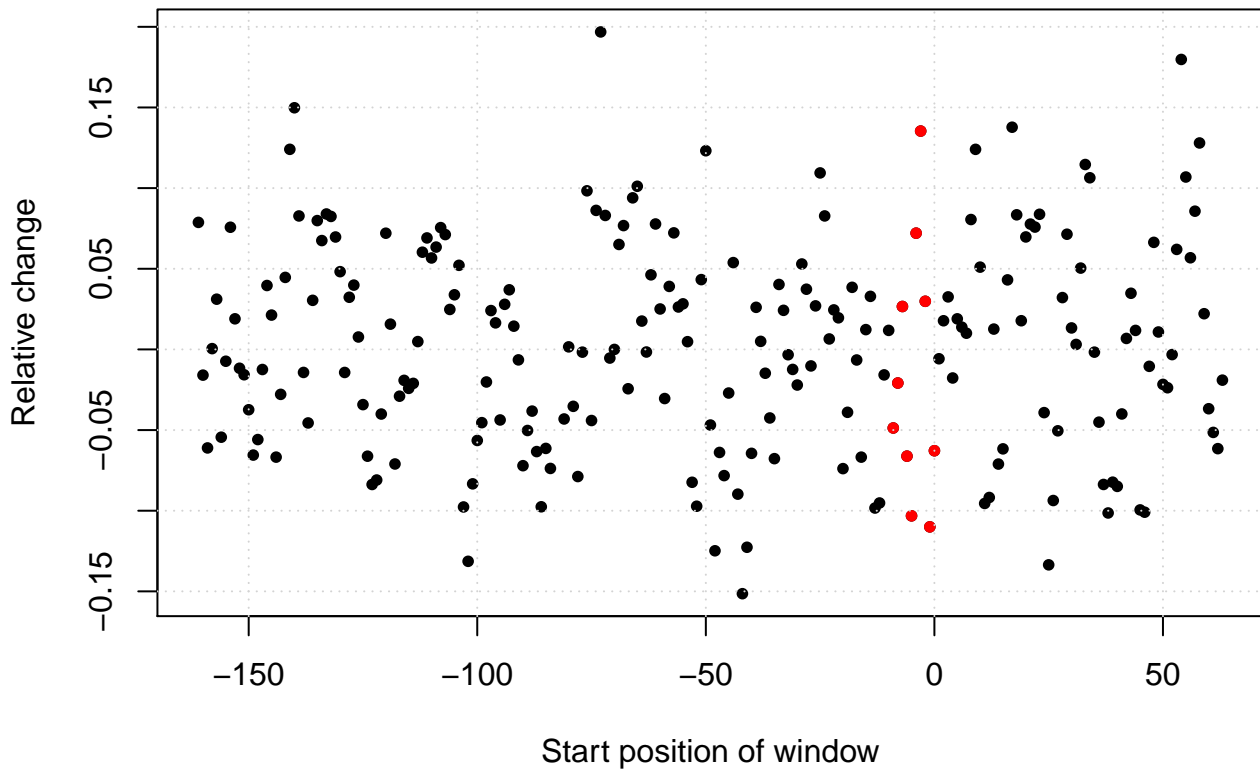

**P05H PEFpercentPred Window Size = 10**

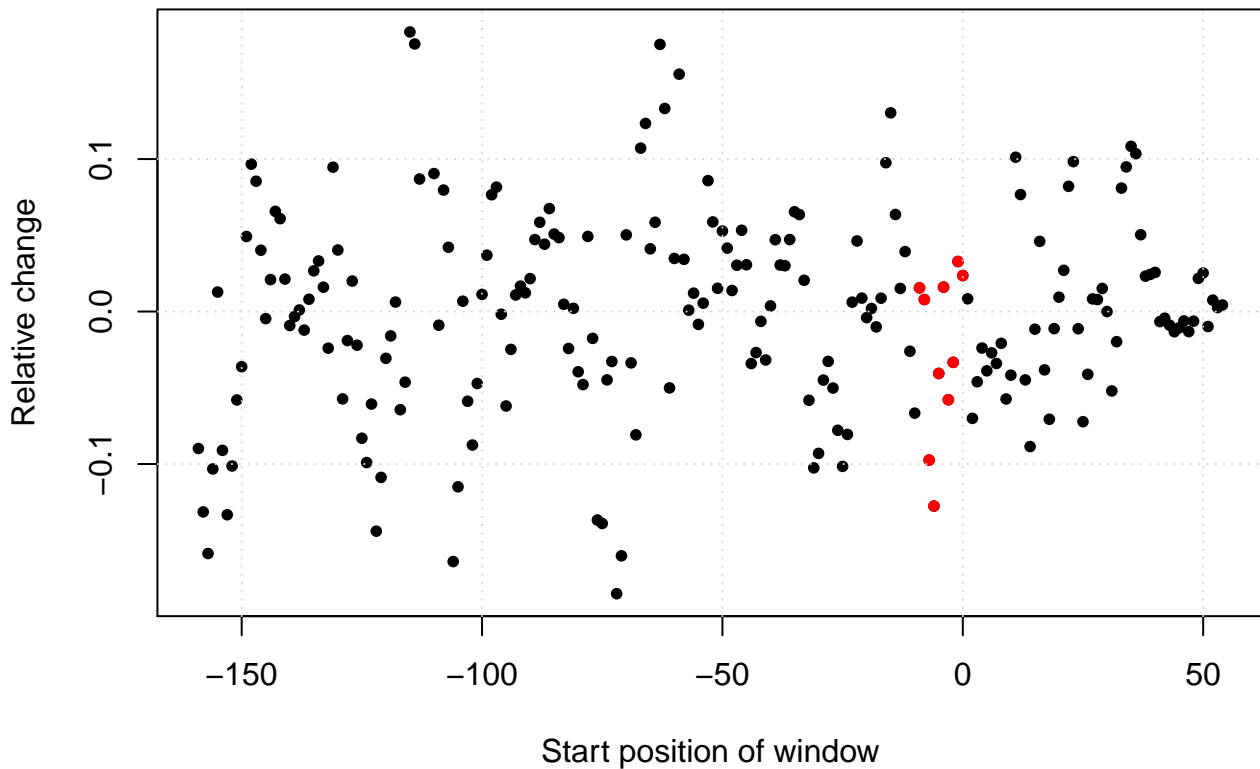

# P06H PEFpercentPred Window Size = 10

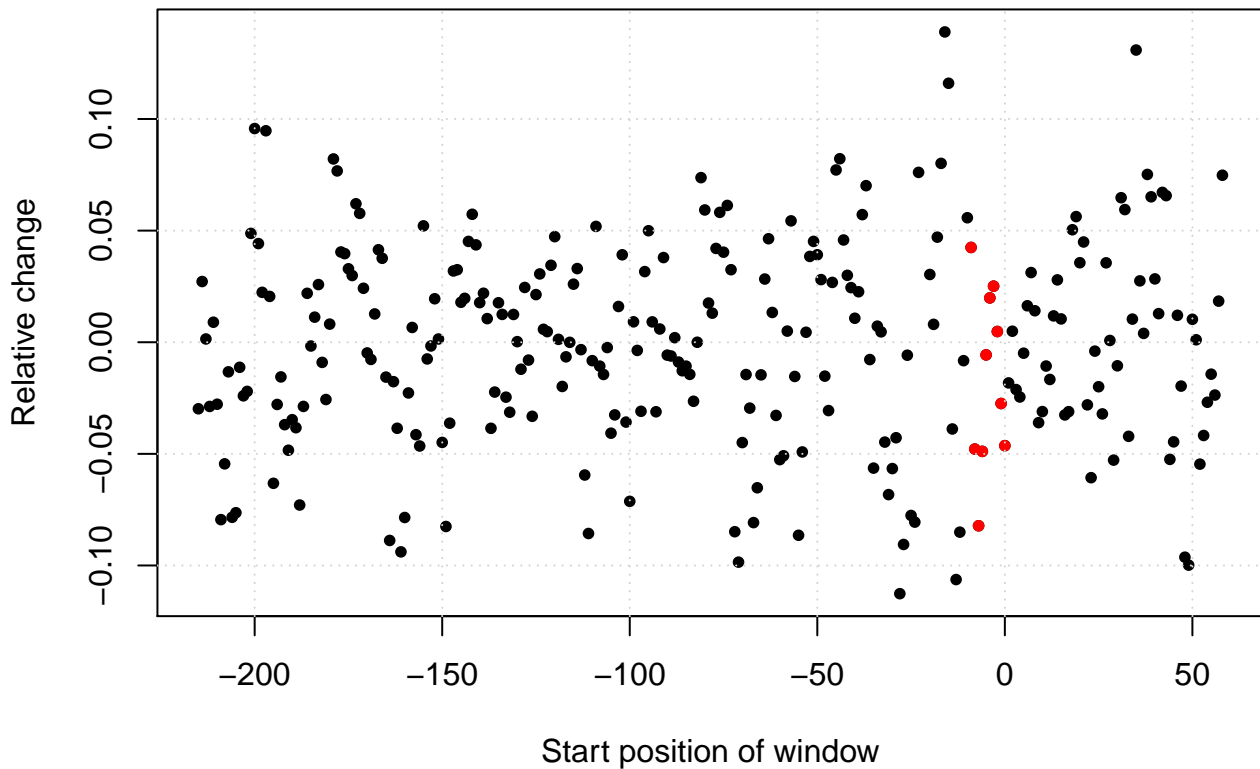

# P07H PEFpercentPred Window Size = 10

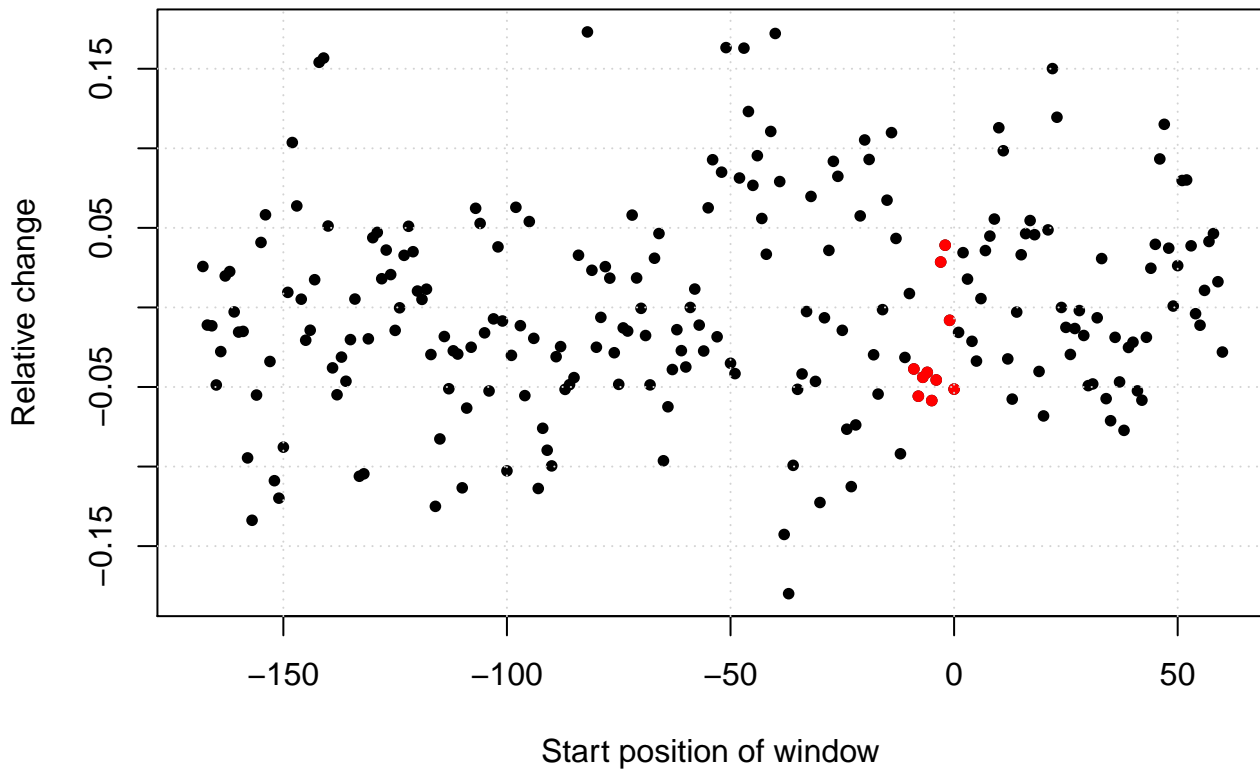

# P08H PEFpercentPred Window Size = 10

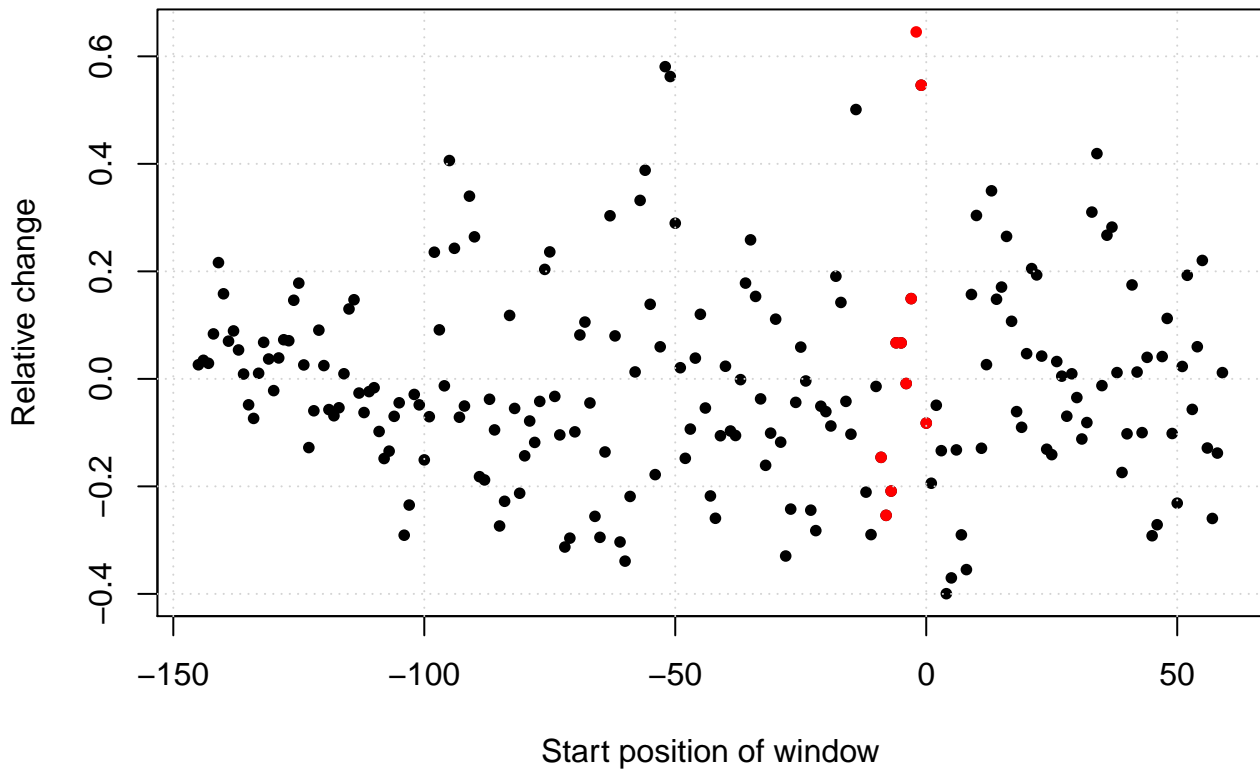

# P09H PEFpercentPred Window Size = 10

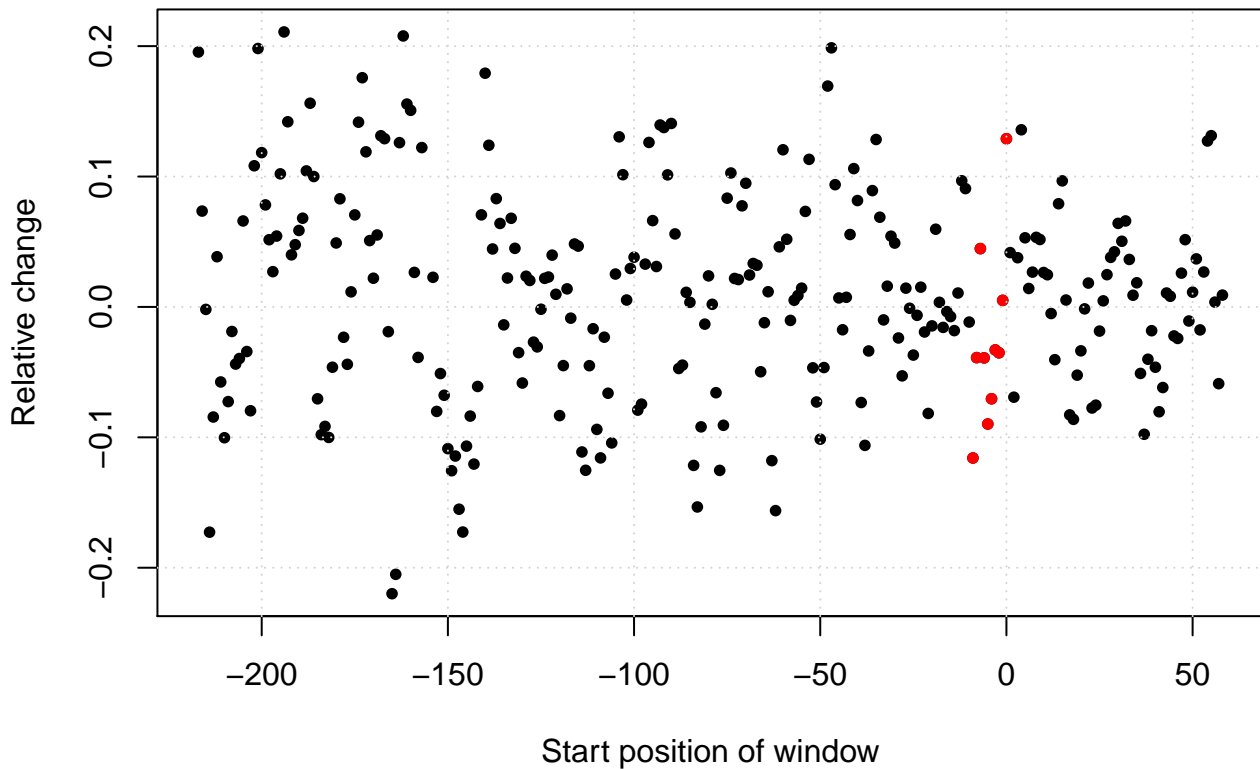



# P11H PEFpercentPred Window Size = 10

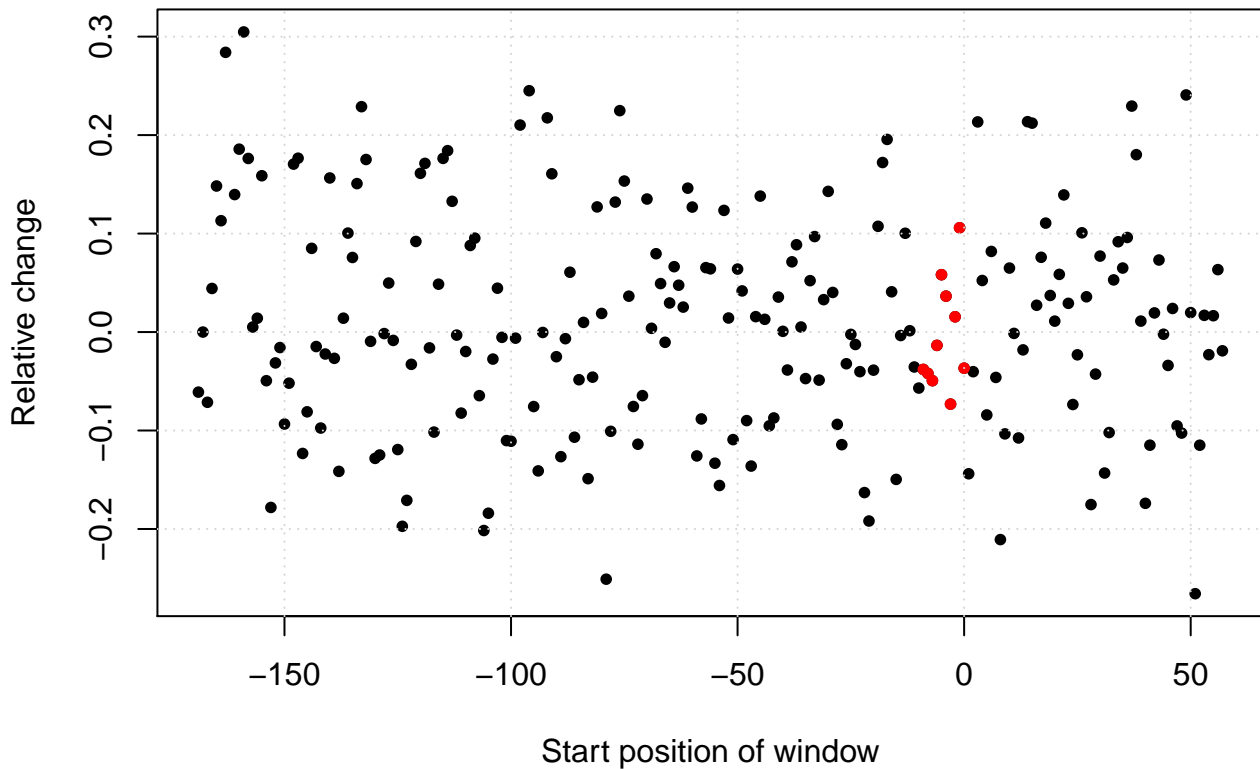

**P12H PEFpercentPred Window Size = 10**

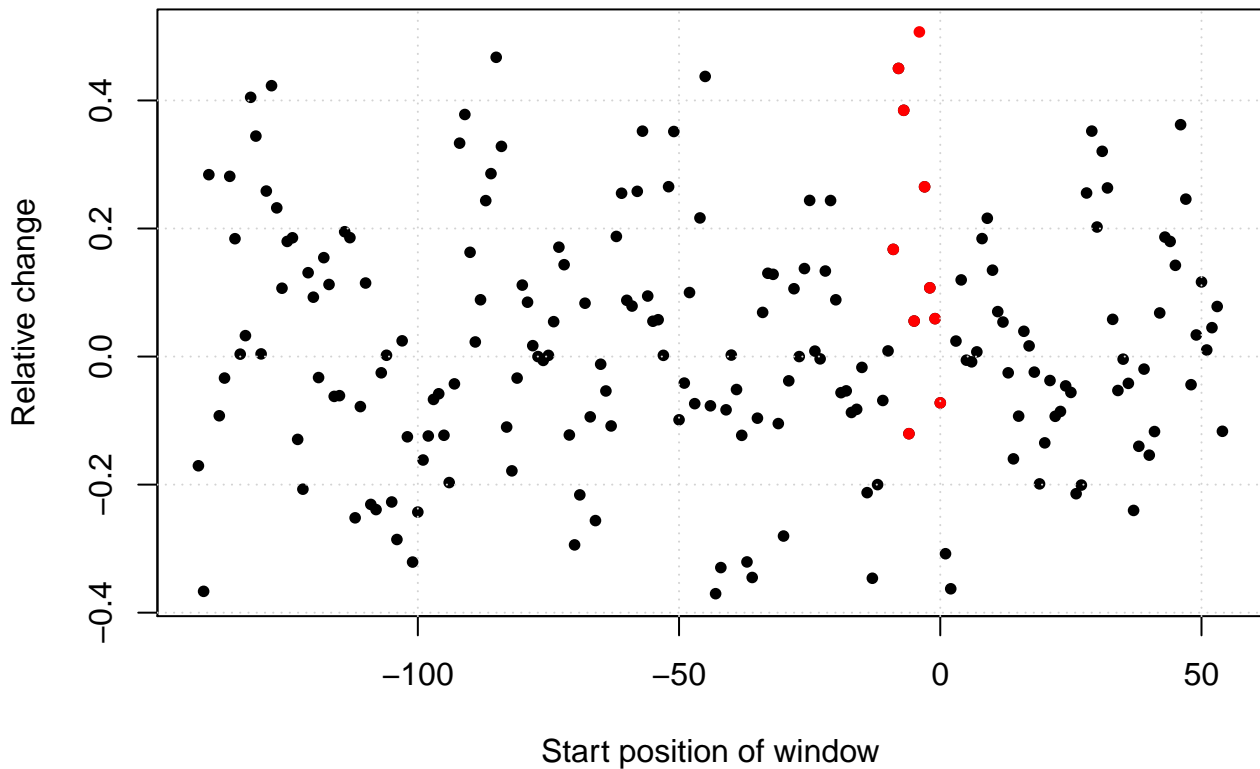

**P13H PEFpercentPred Window Size = 10**

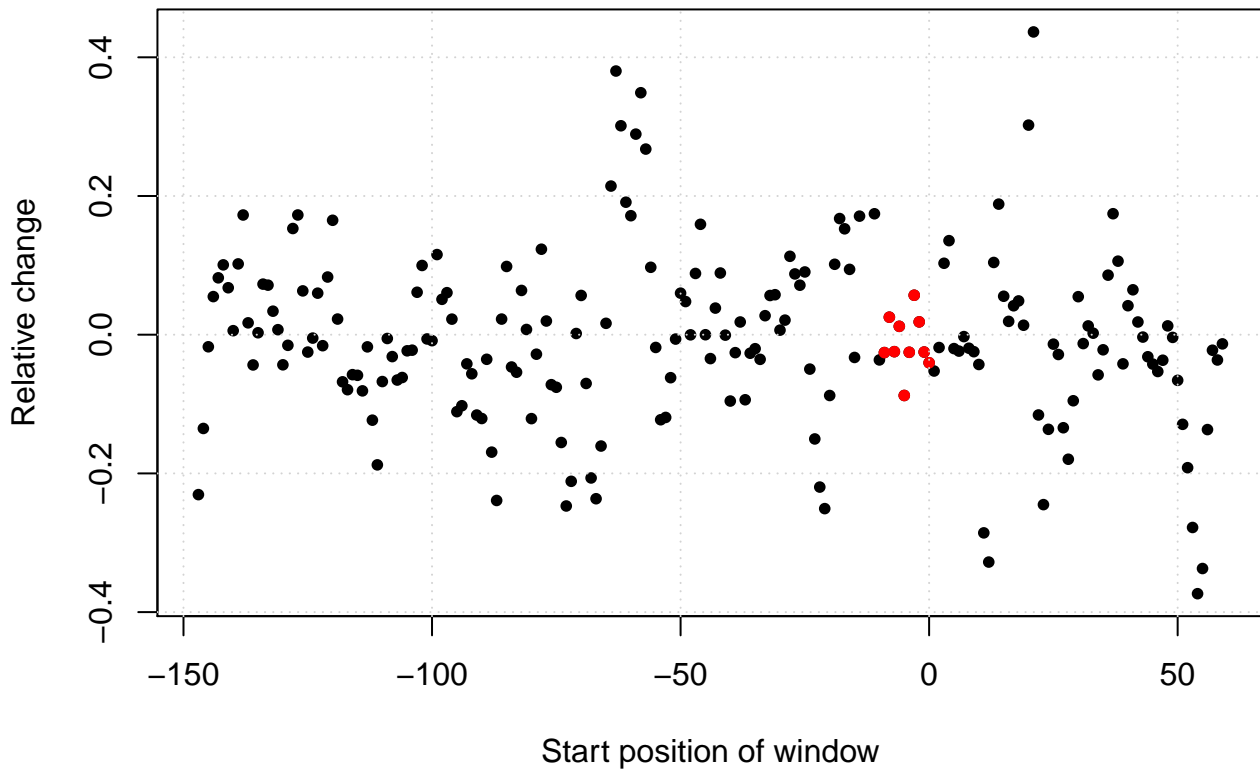

# P14H PEFpercentPred Window Size = 10

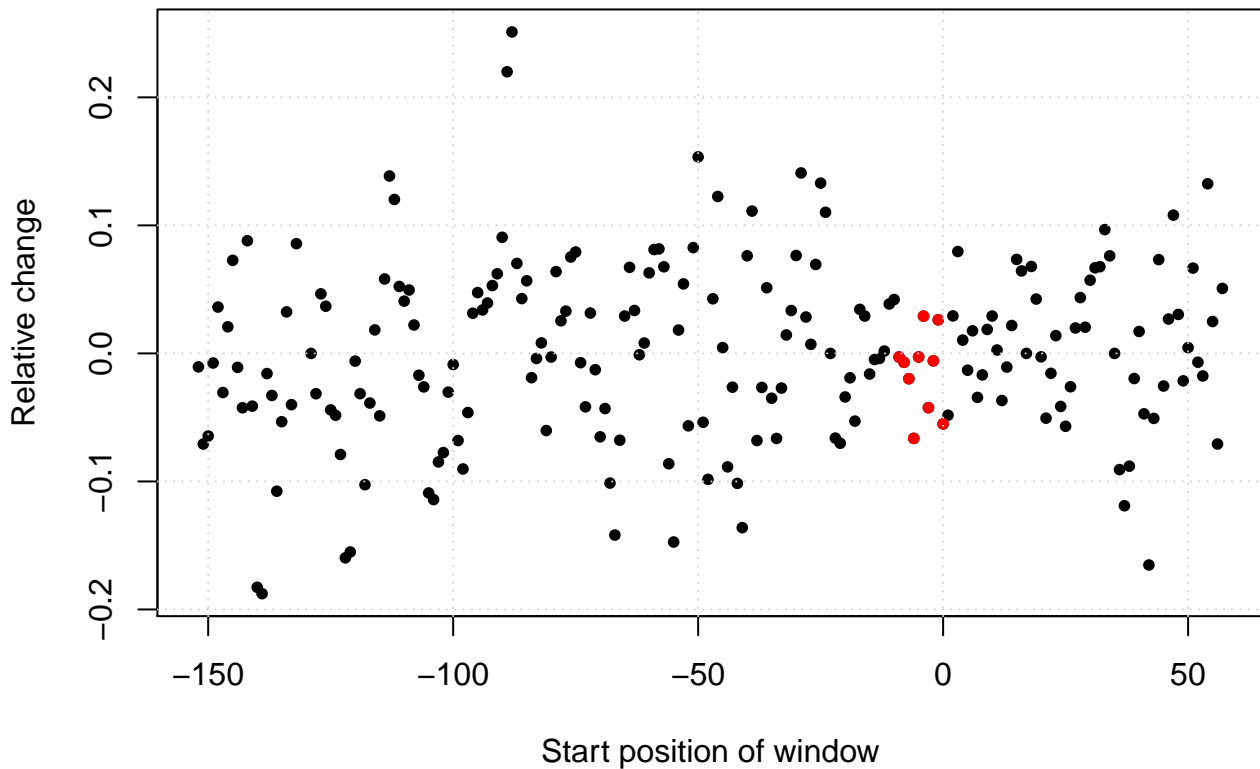

# P15H PEFpercentPred Window Size = 10

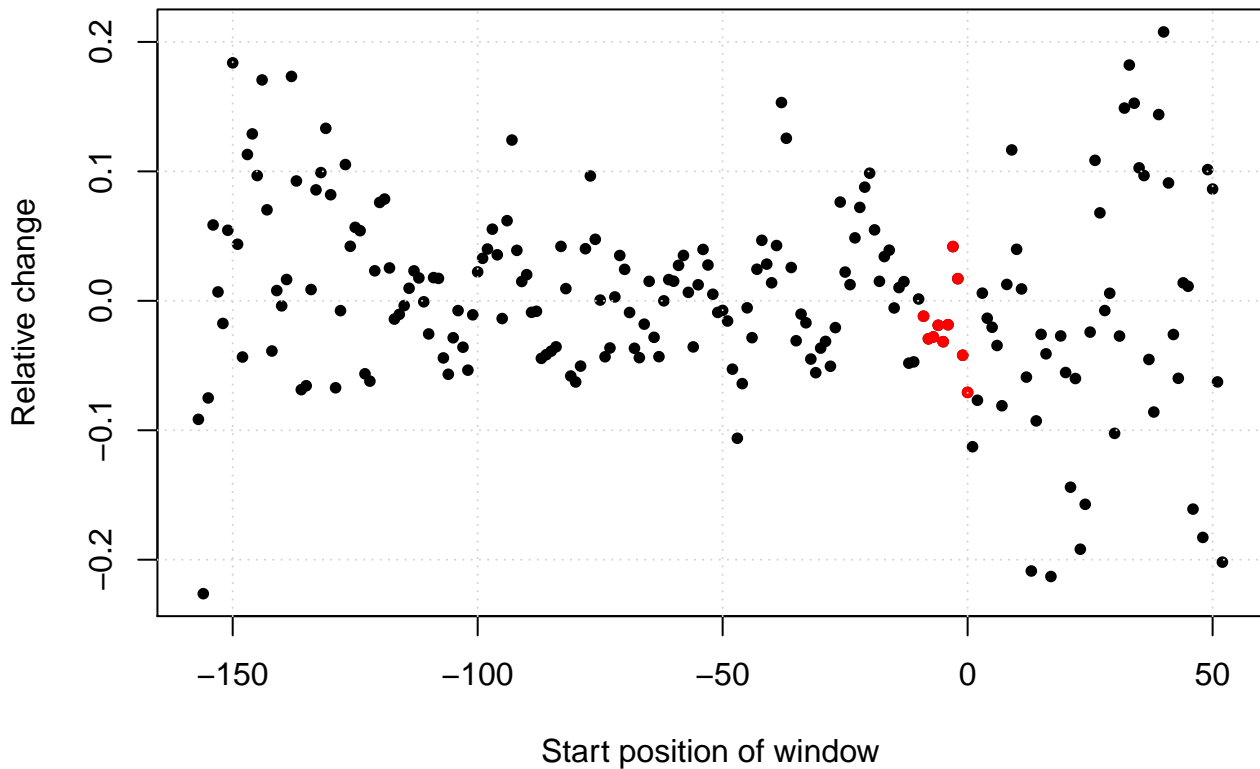

# P01A PEFpercentPred Window Size = 10

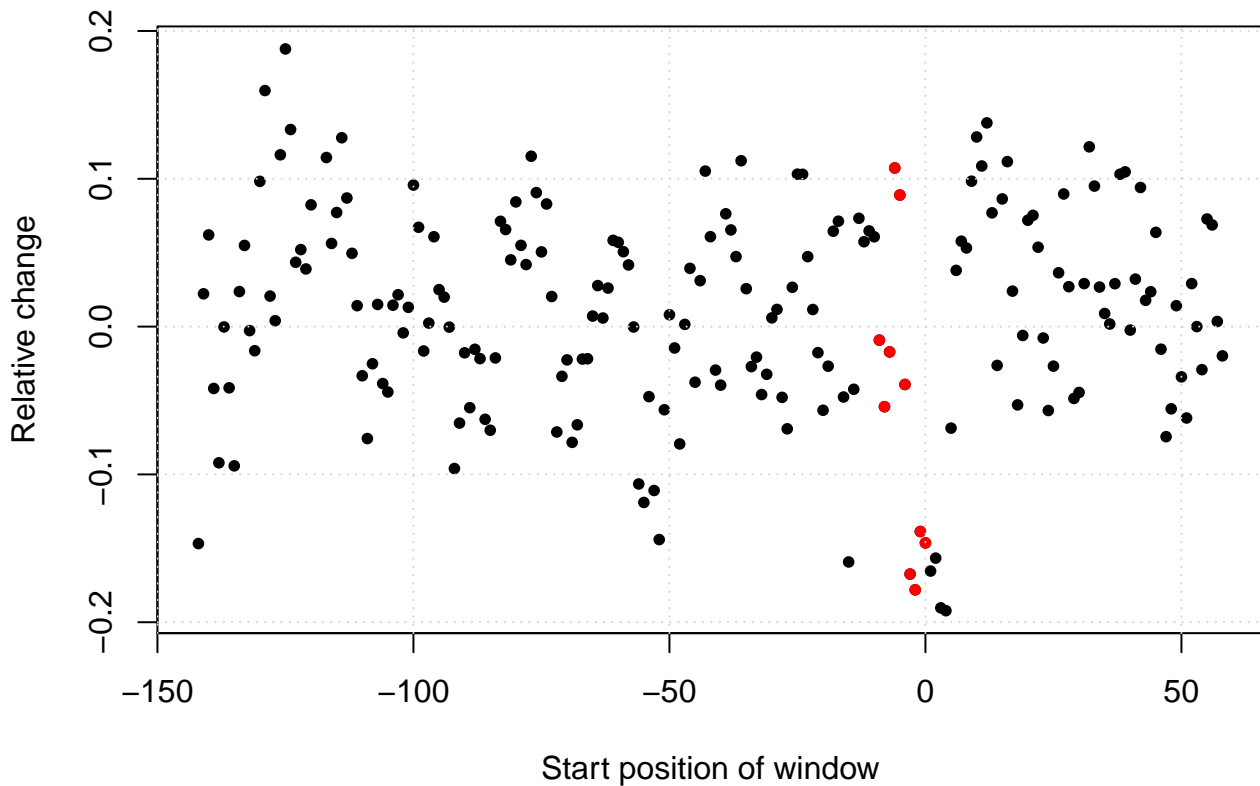

# P02A PEFpercentPred Window Size = 10

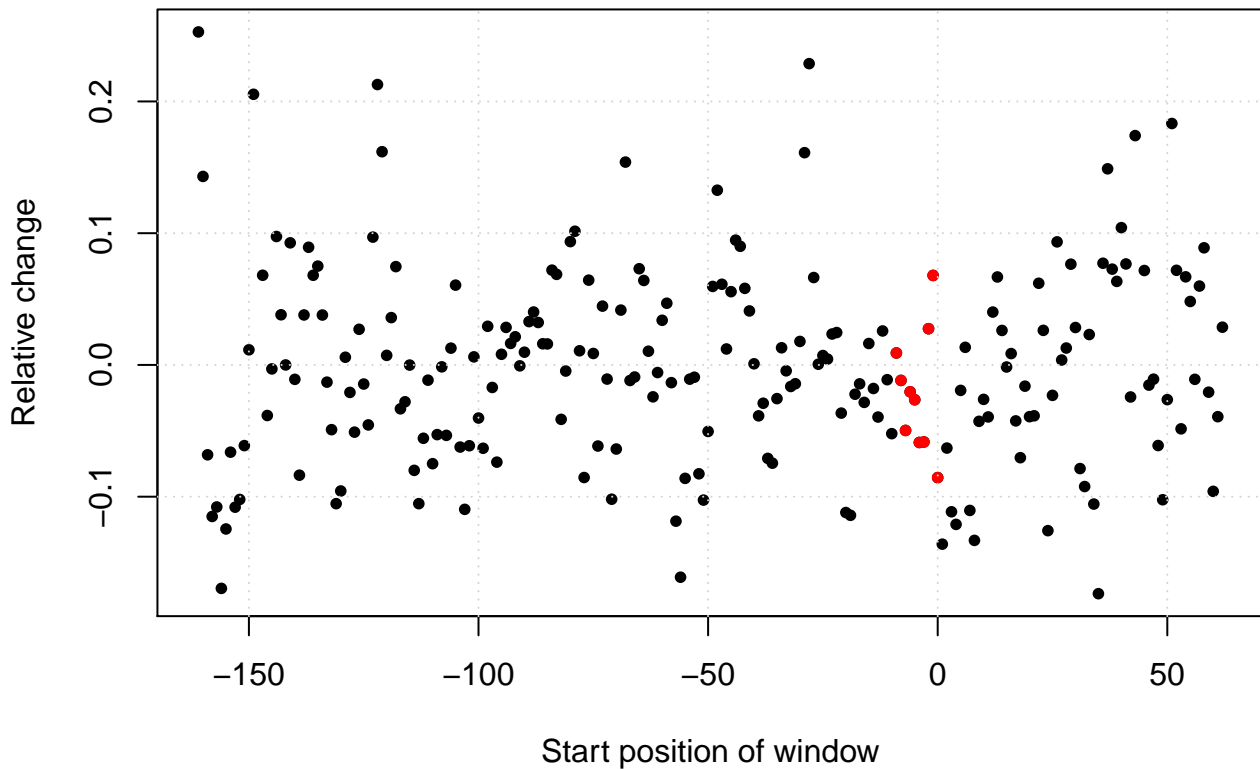

# P04A PEFpercentPred Window Size = 10

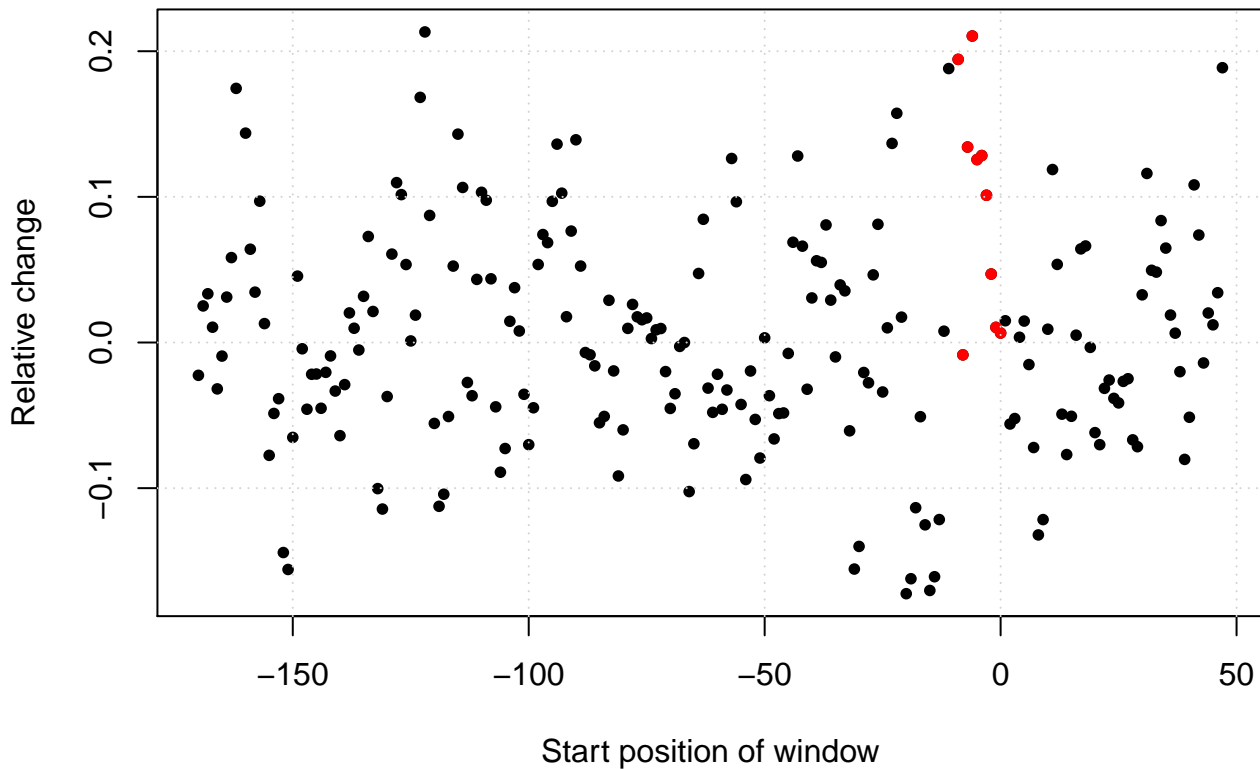



# P05A PEFpercentPred Window Size = 10

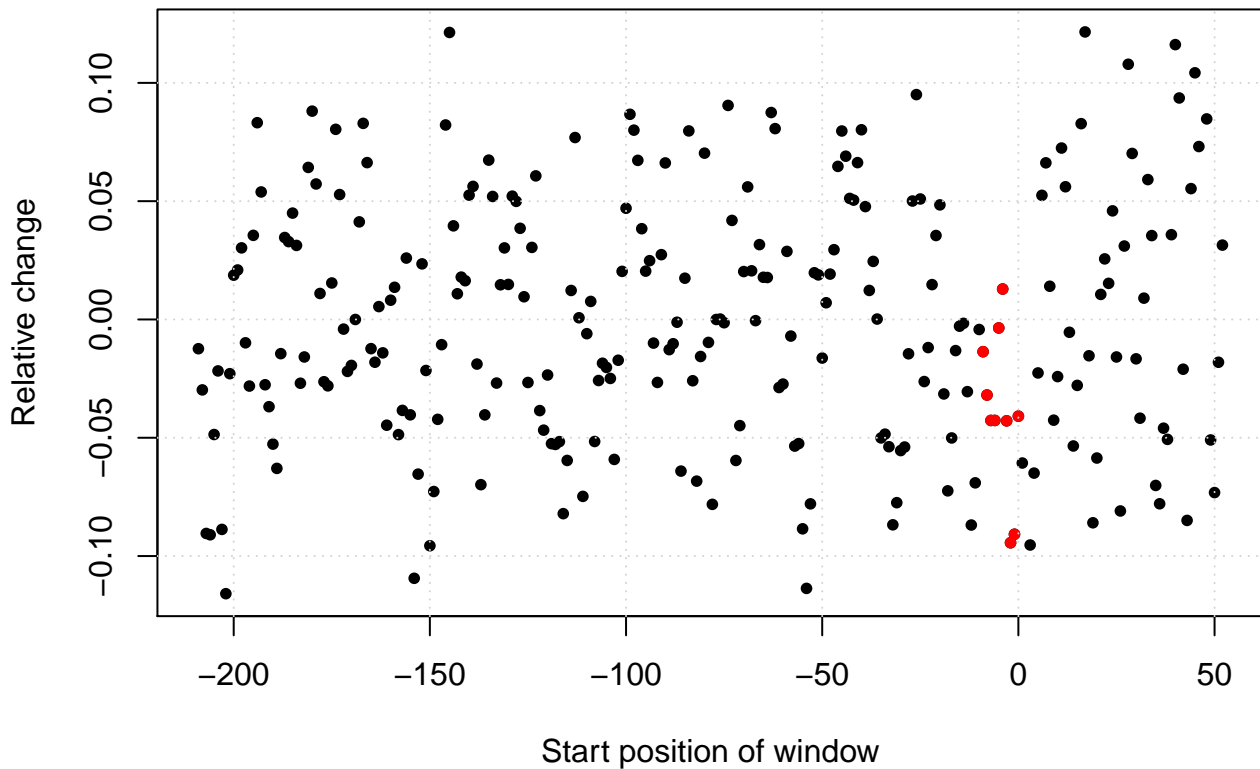

# P06A PEFpercentPred Window Size = 10

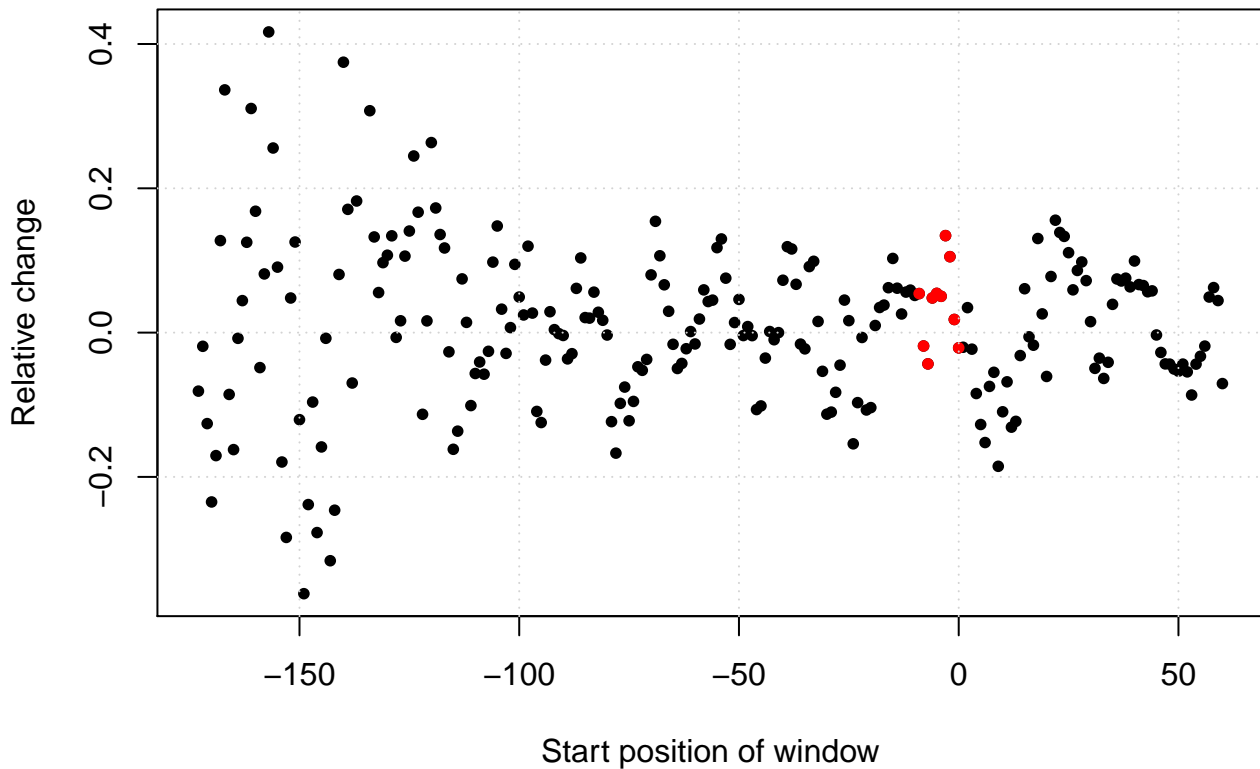

# P07A PEFpercentPred Window Size = 10

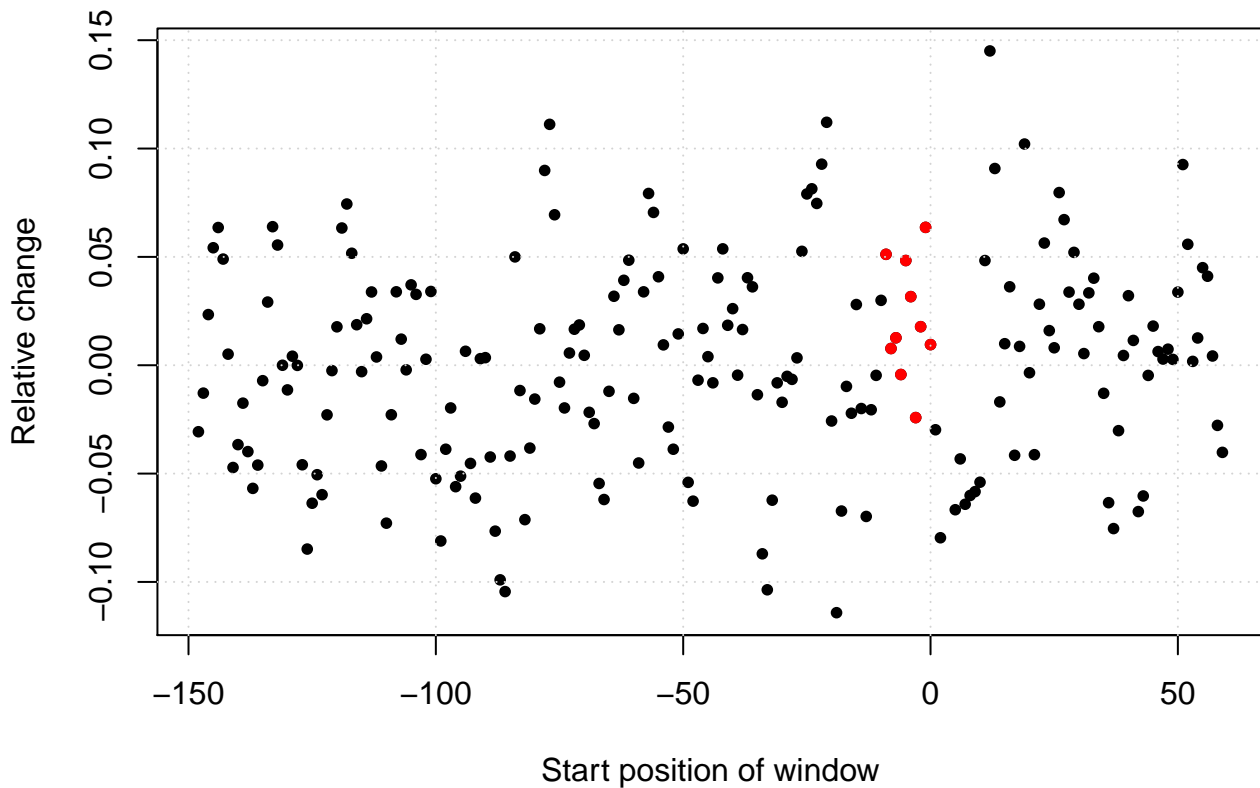

# P08A PEFpercentPred Window Size = 10

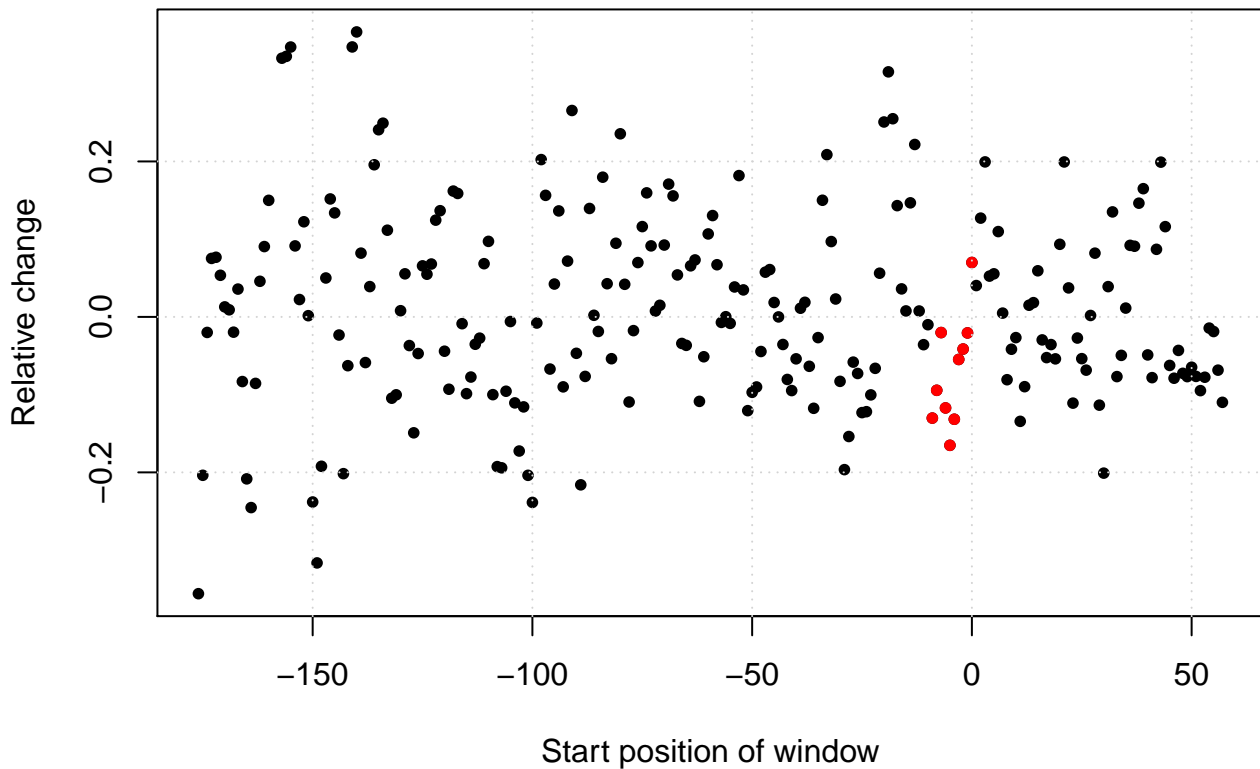

# P09A PEFpercentPred Window Size = 10

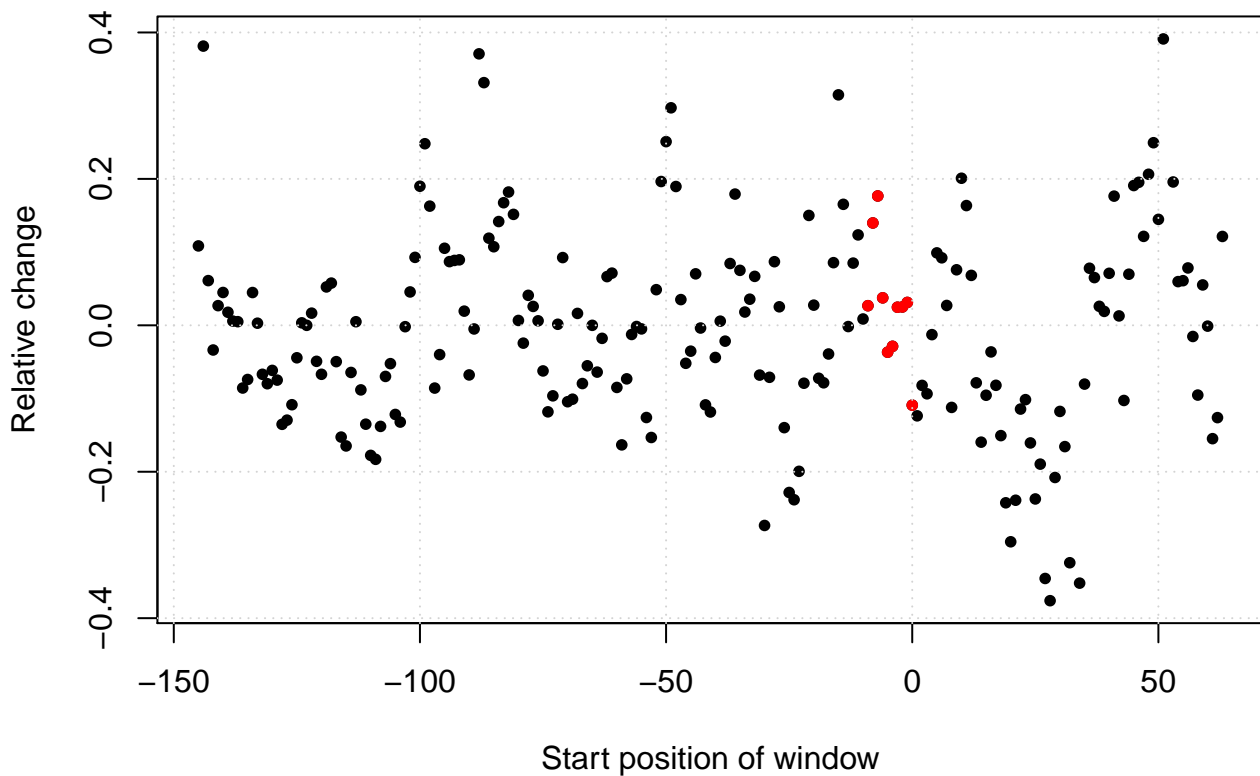

# P10A PEFpercentPred Window Size = 10

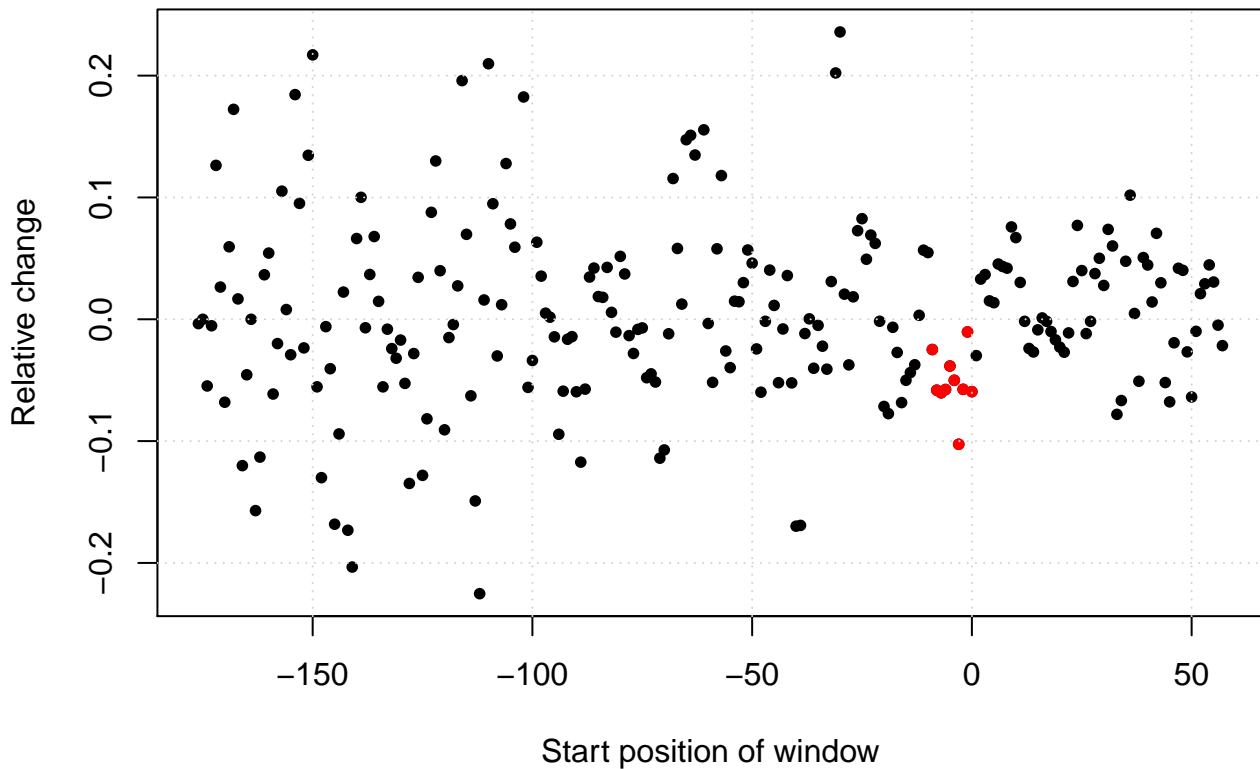

# P11A PEFpercentPred Window Size = 10

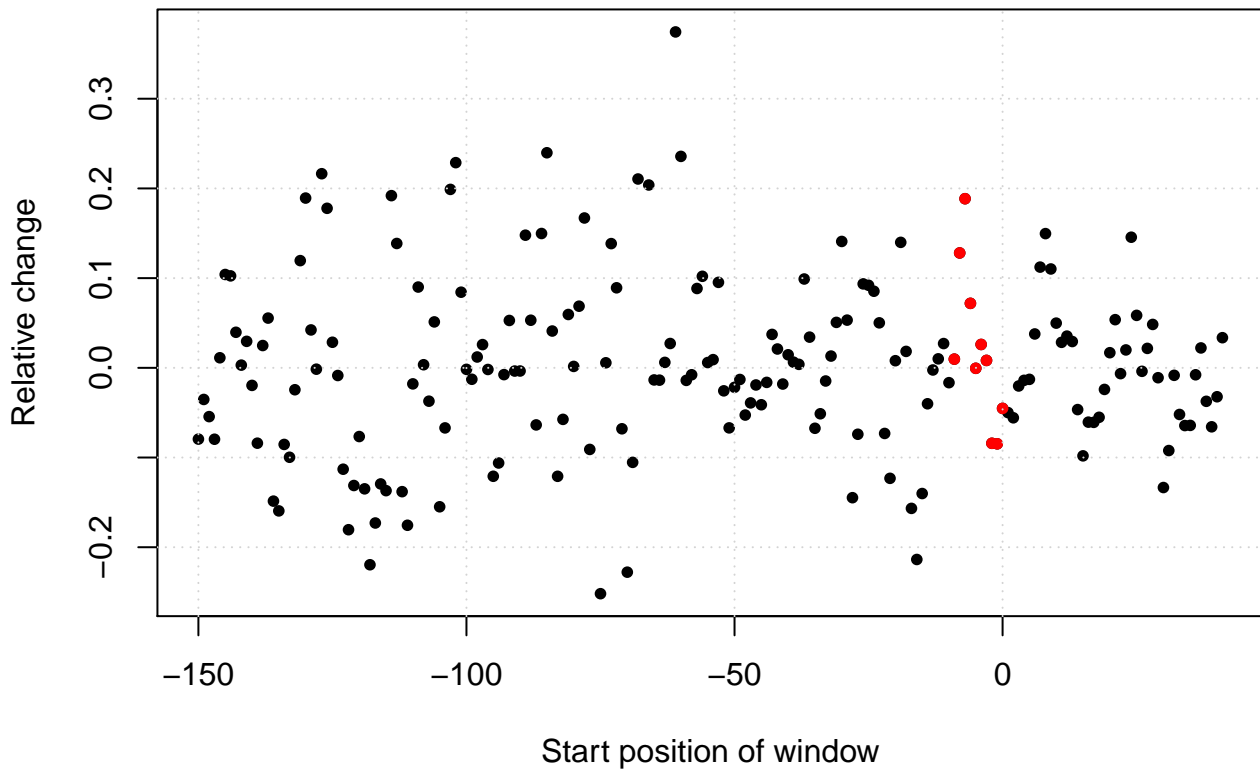

**P12A PEFpercentPred Window Size = 10**

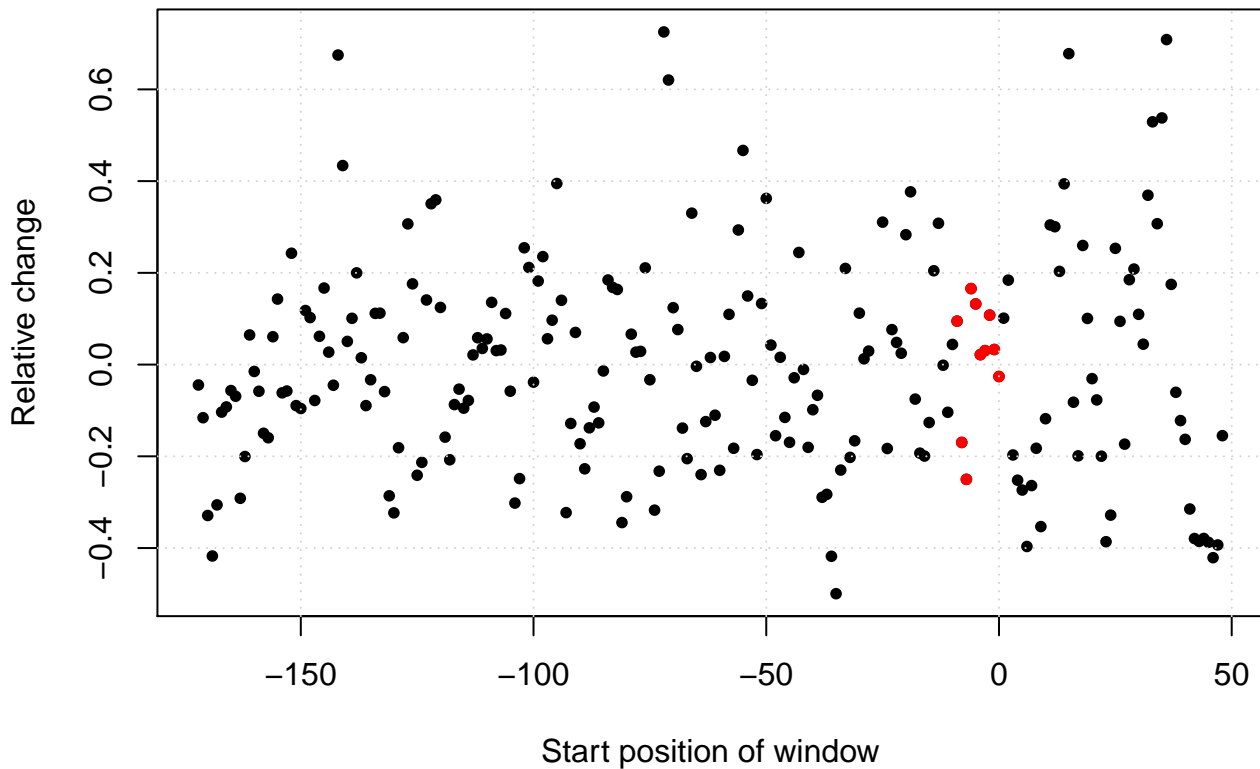



# P13A PEFpercentPred Window Size = 10

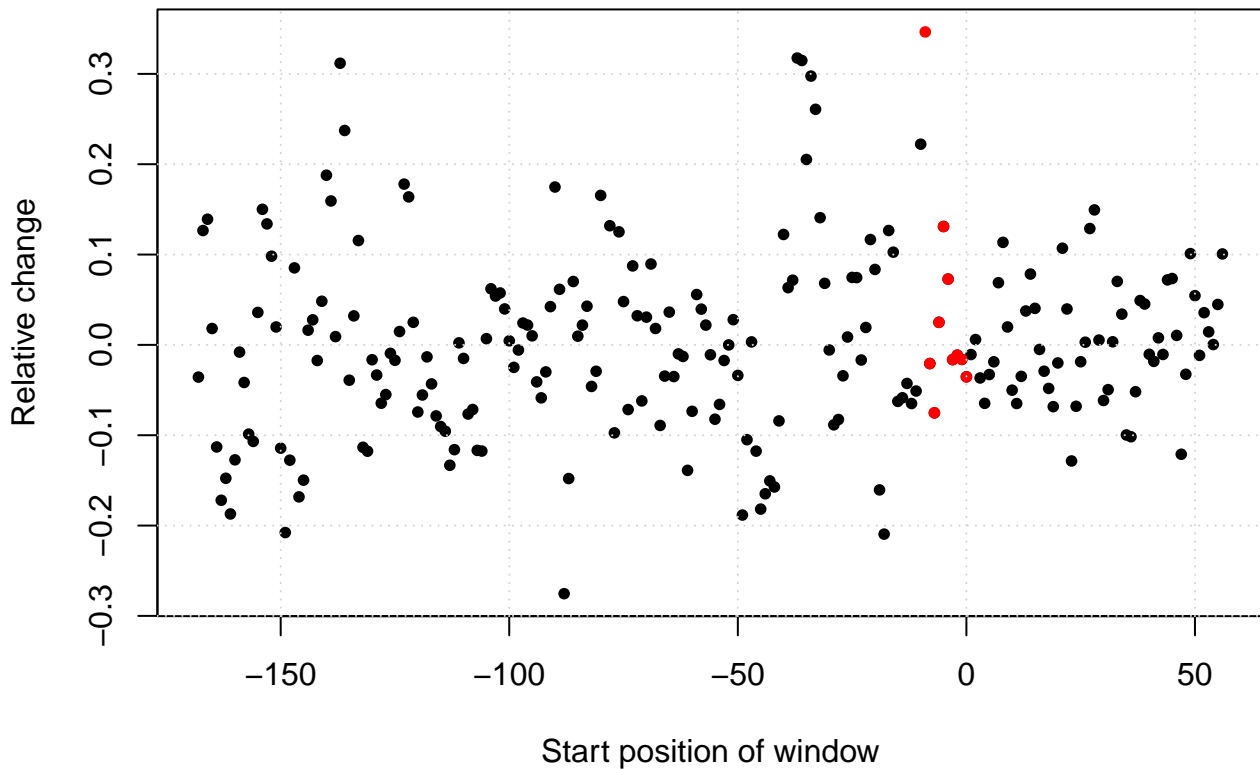

## P01H PercentageOfEosinophils Window Size = 10

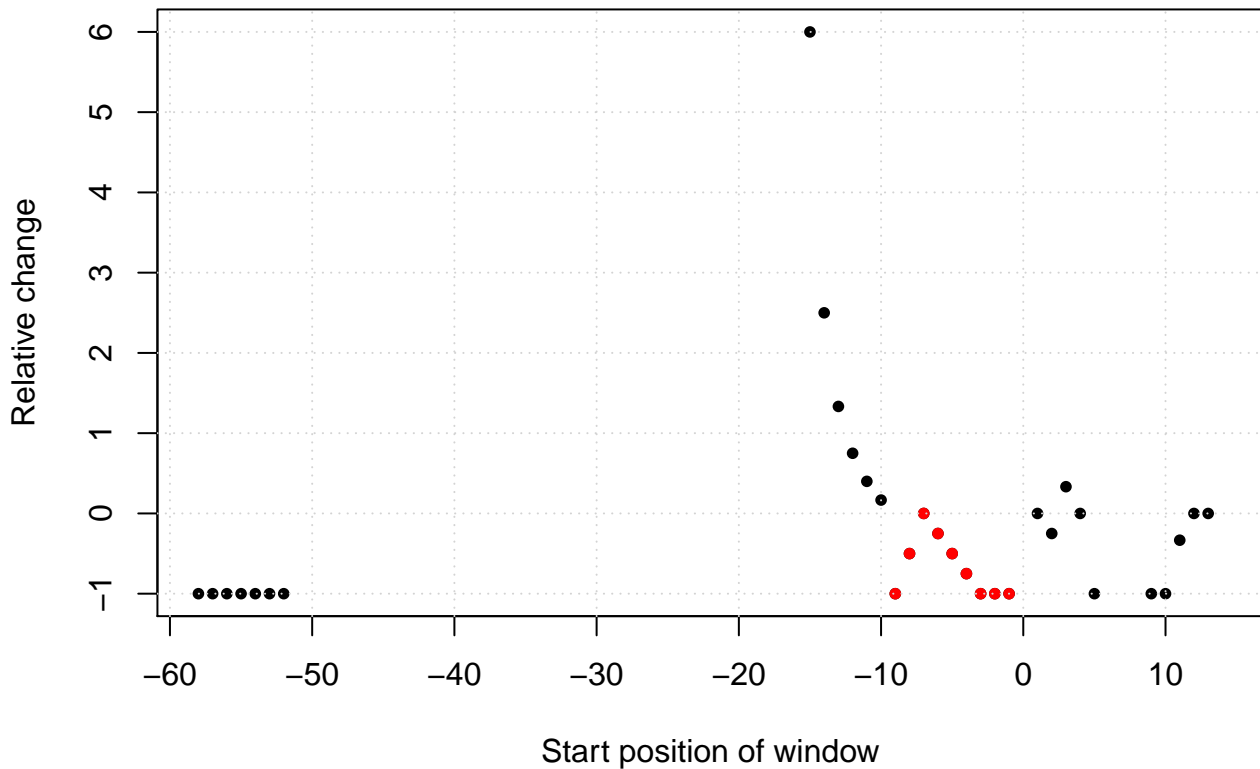

# P03H PercentageOfEosinophils Window Size = 10

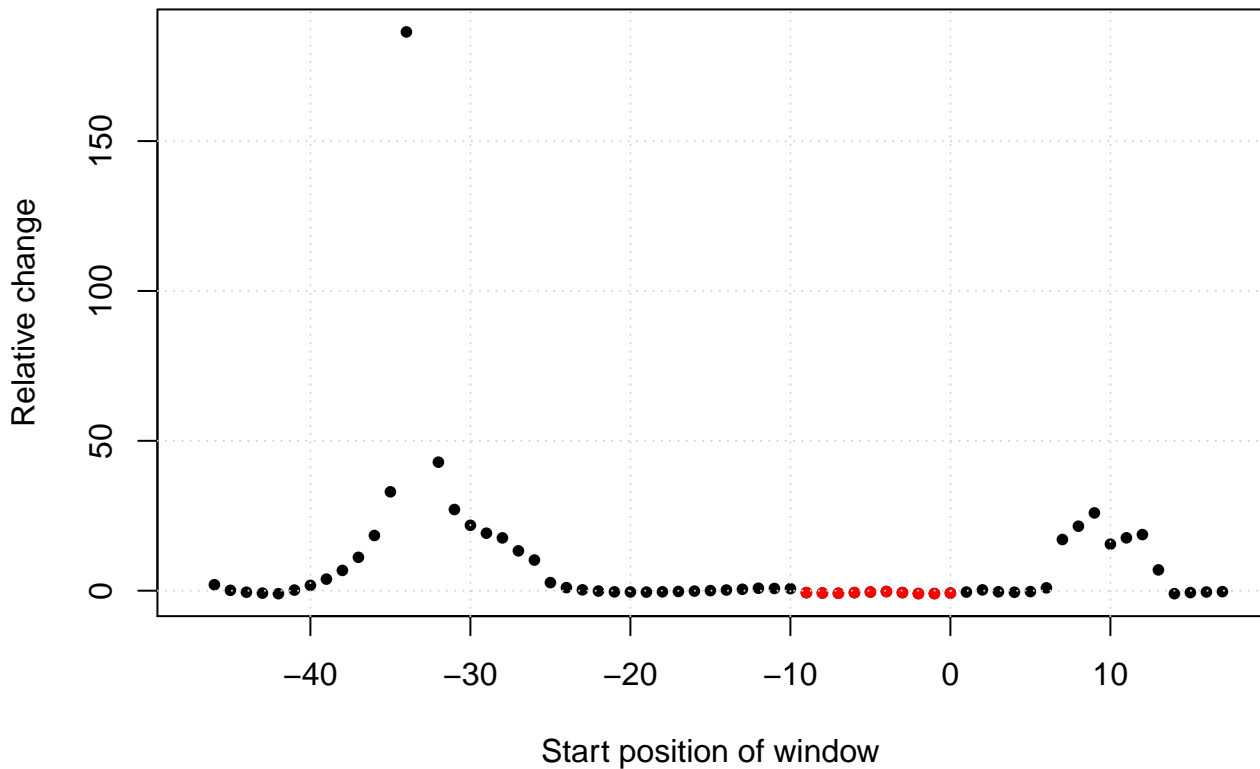

## P05H PercentageOfEosinophils Window Size = 10

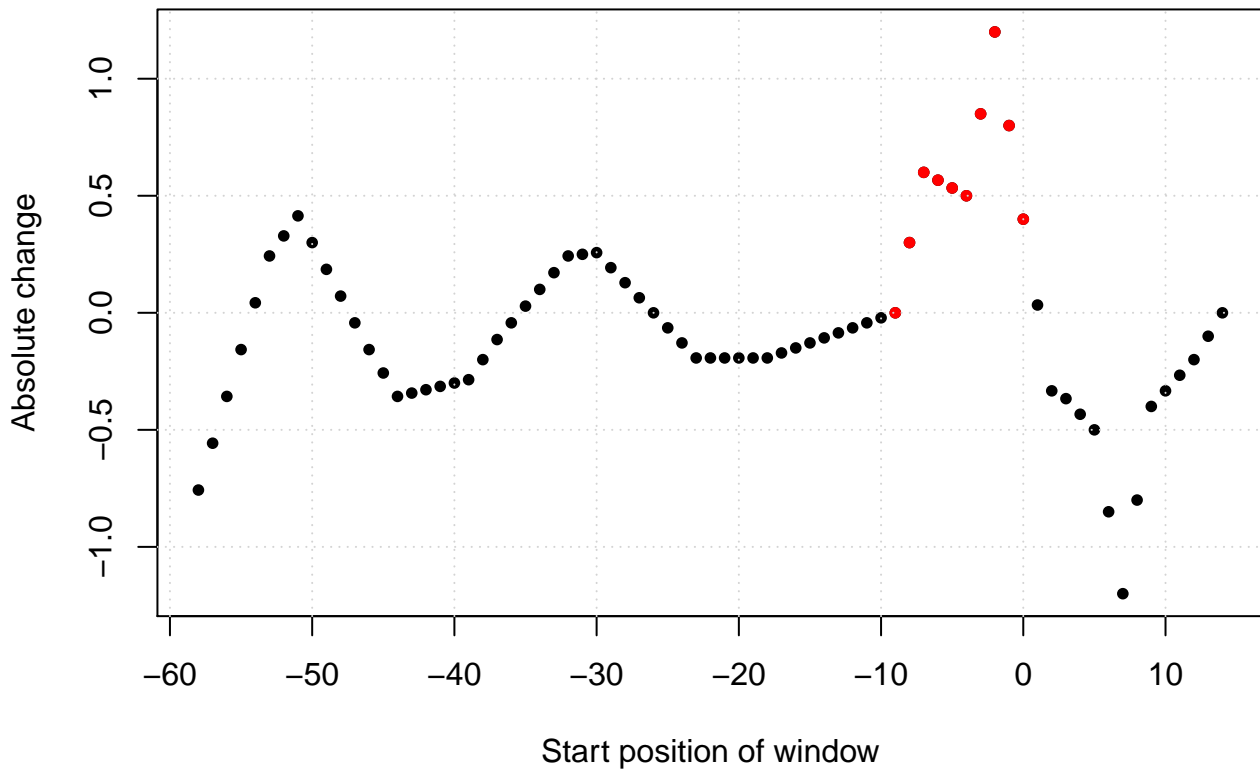

## P06H PercentageOfEosinophils Window Size = 10

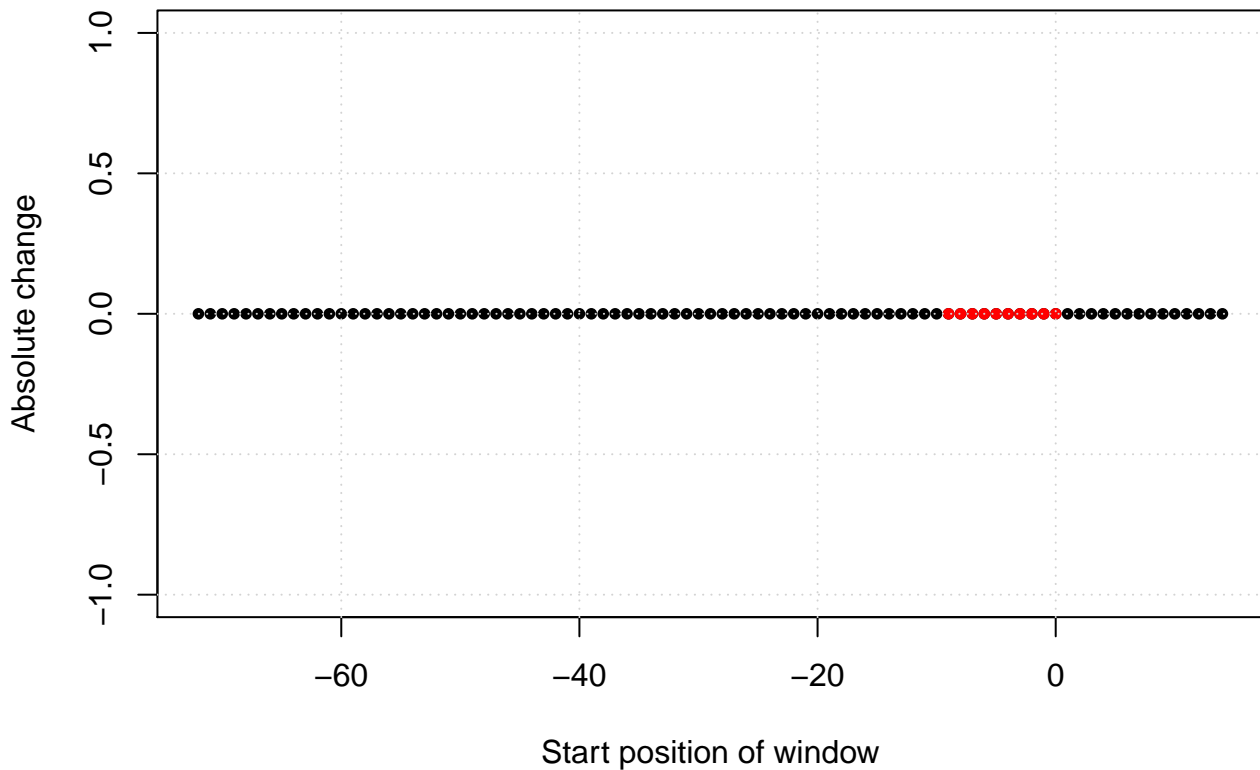

# P07H PercentageOfEosinophils Window Size = 10

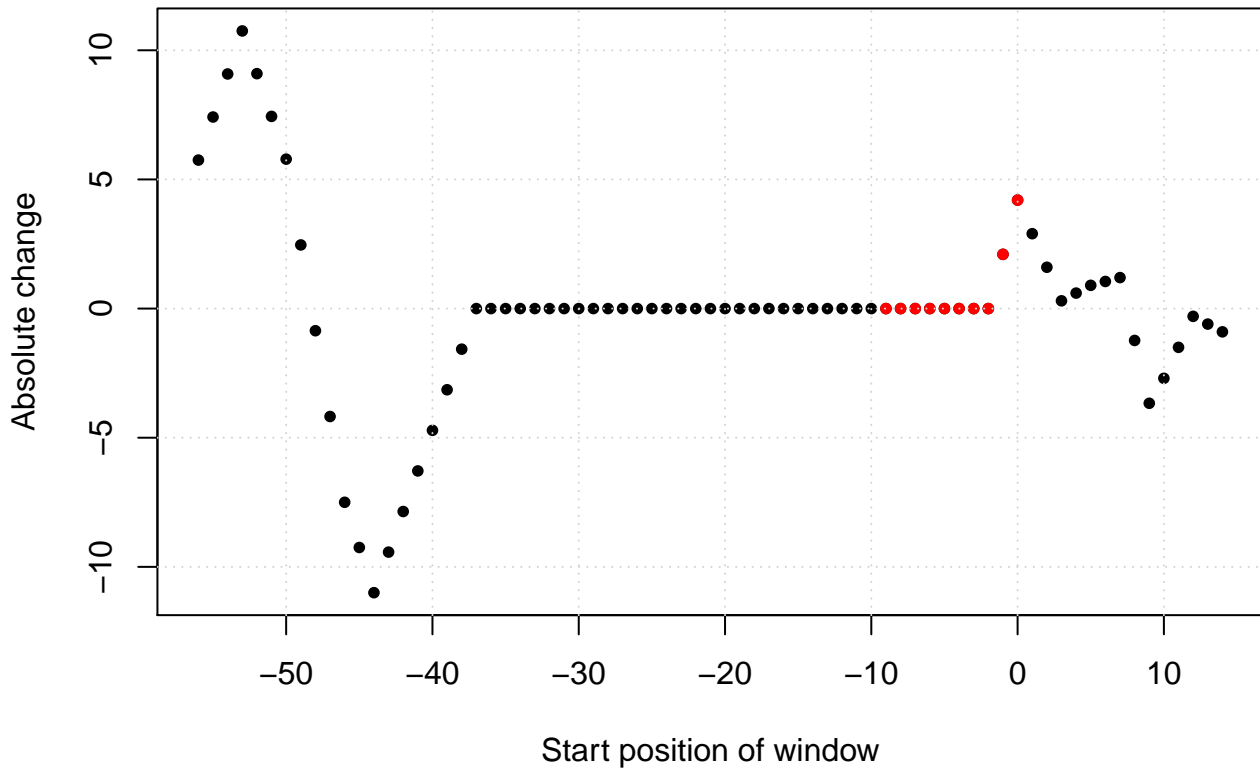

# P08H PercentageOfEosinophils Window Size = 10

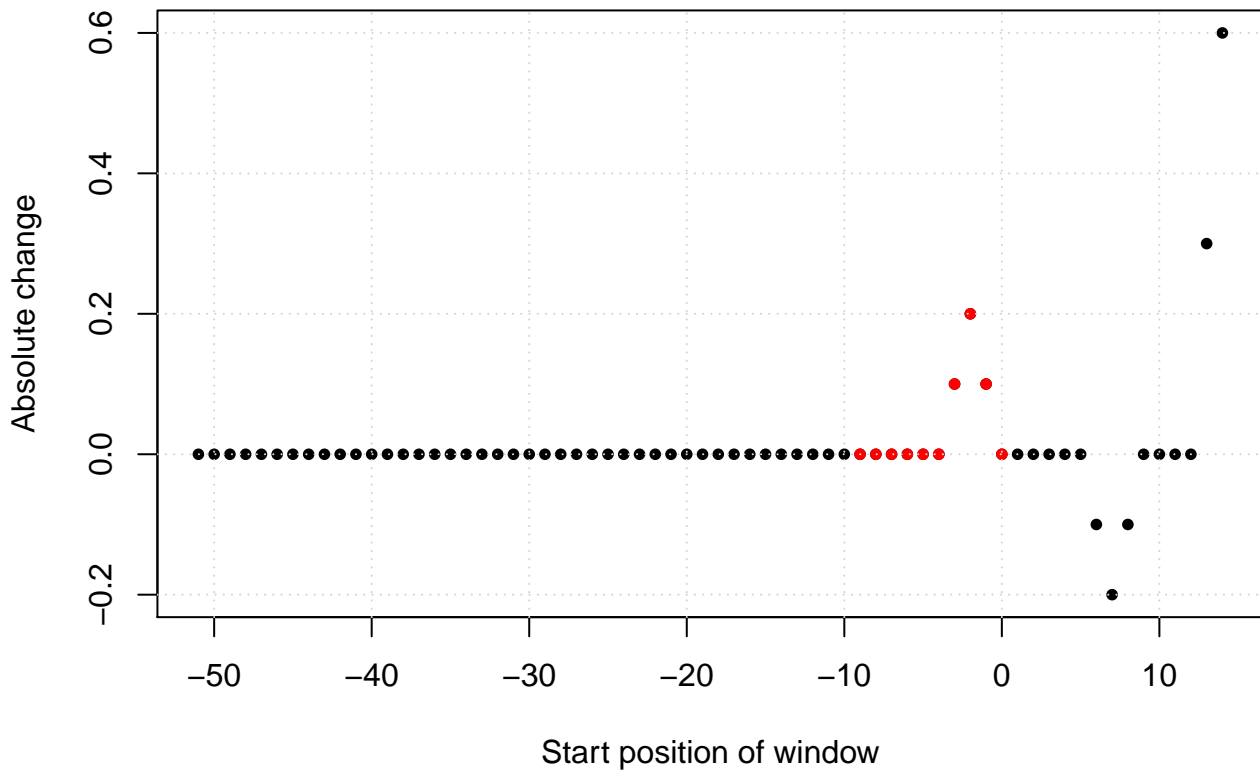

## P09H PercentageOfEosinophils Window Size = 10





# P11H PercentageOfEosinophils Window Size = 10

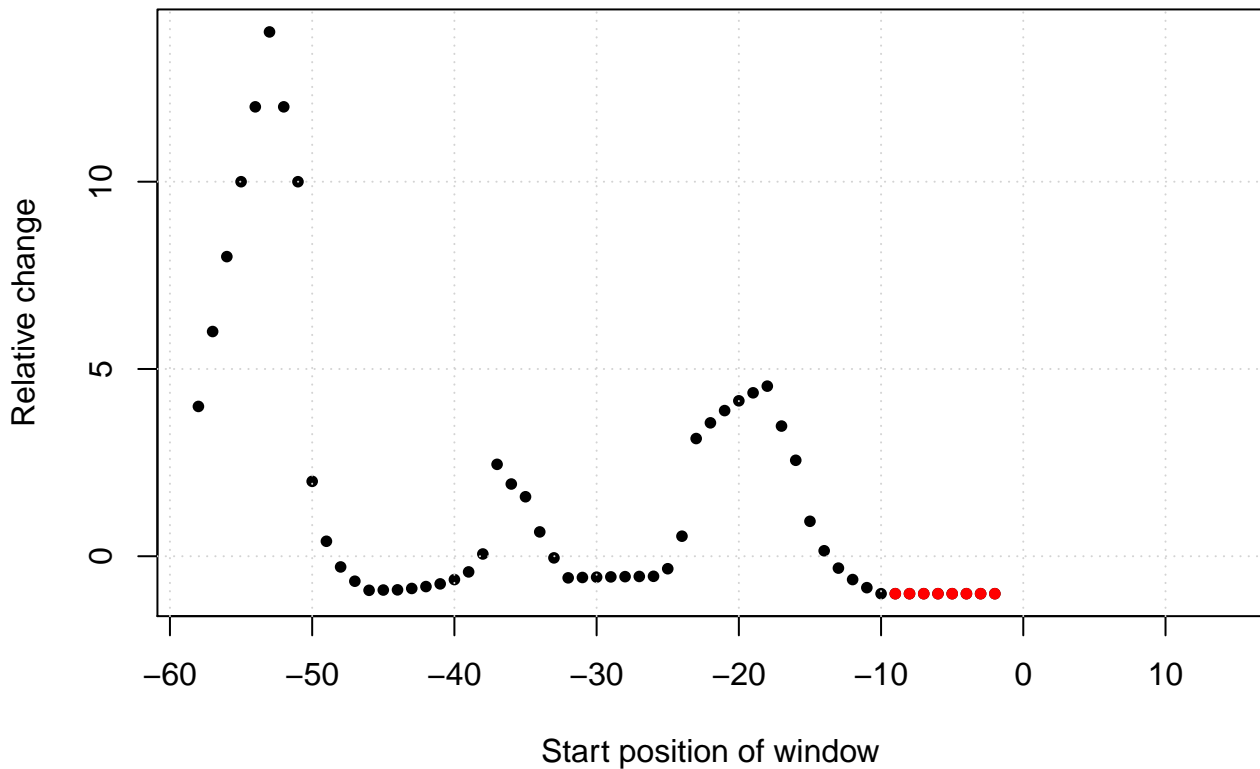

## P12H PercentageOfEosinophils Window Size = 10

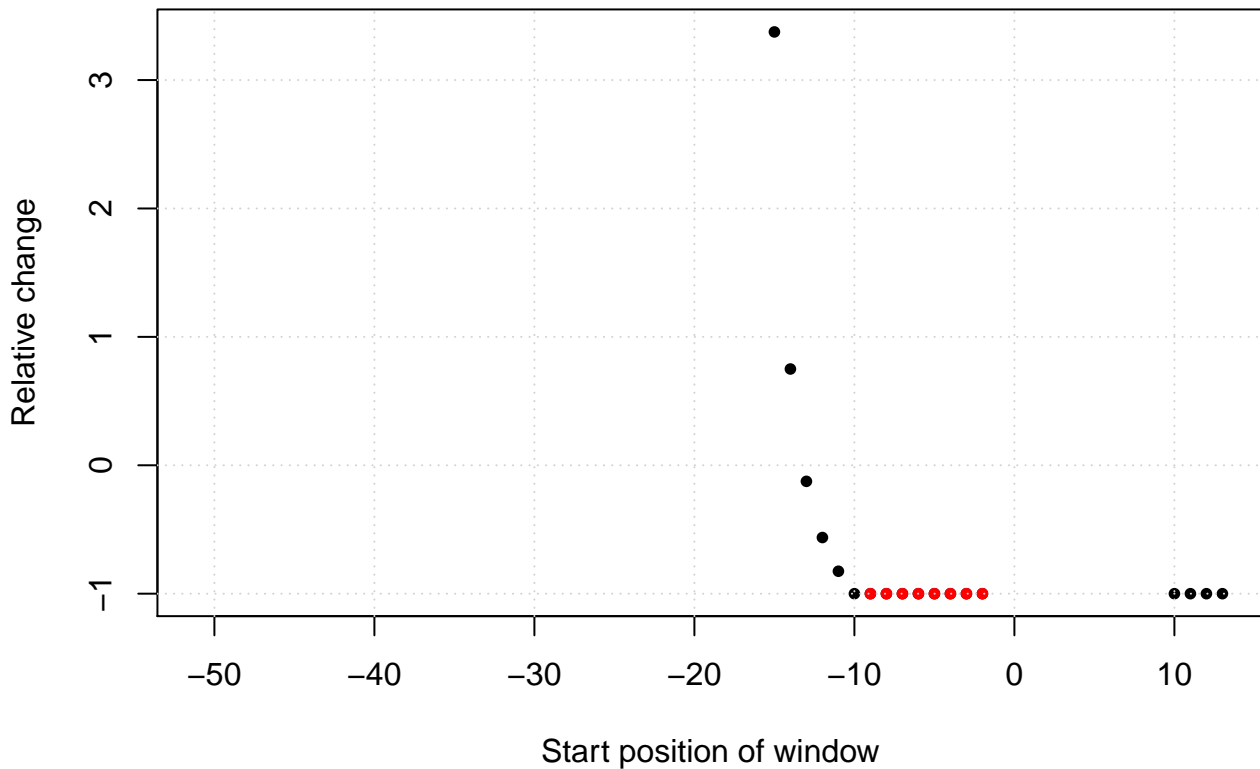

## P13H PercentageOfEosinophils Window Size = 10

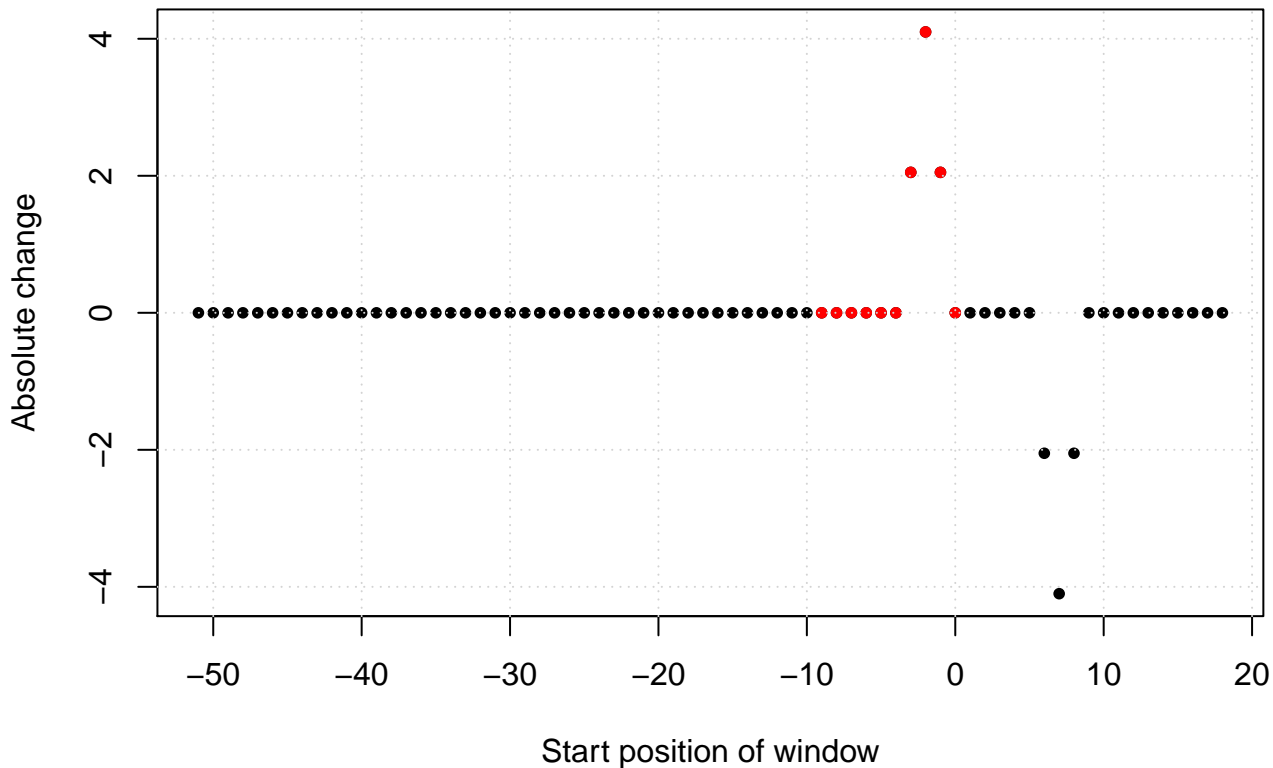

## P14H PercentageOfEosinophils Window Size = 10

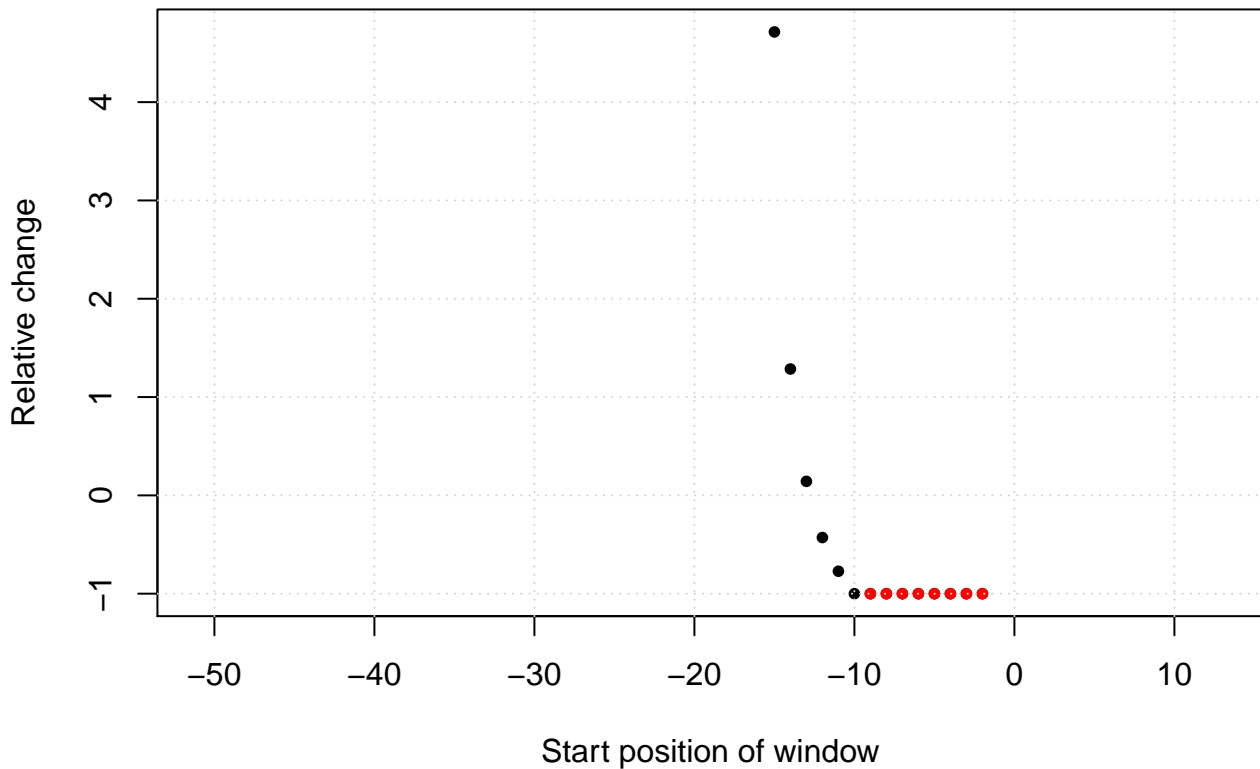

## P15H PercentageOfEosinophils Window Size = 10

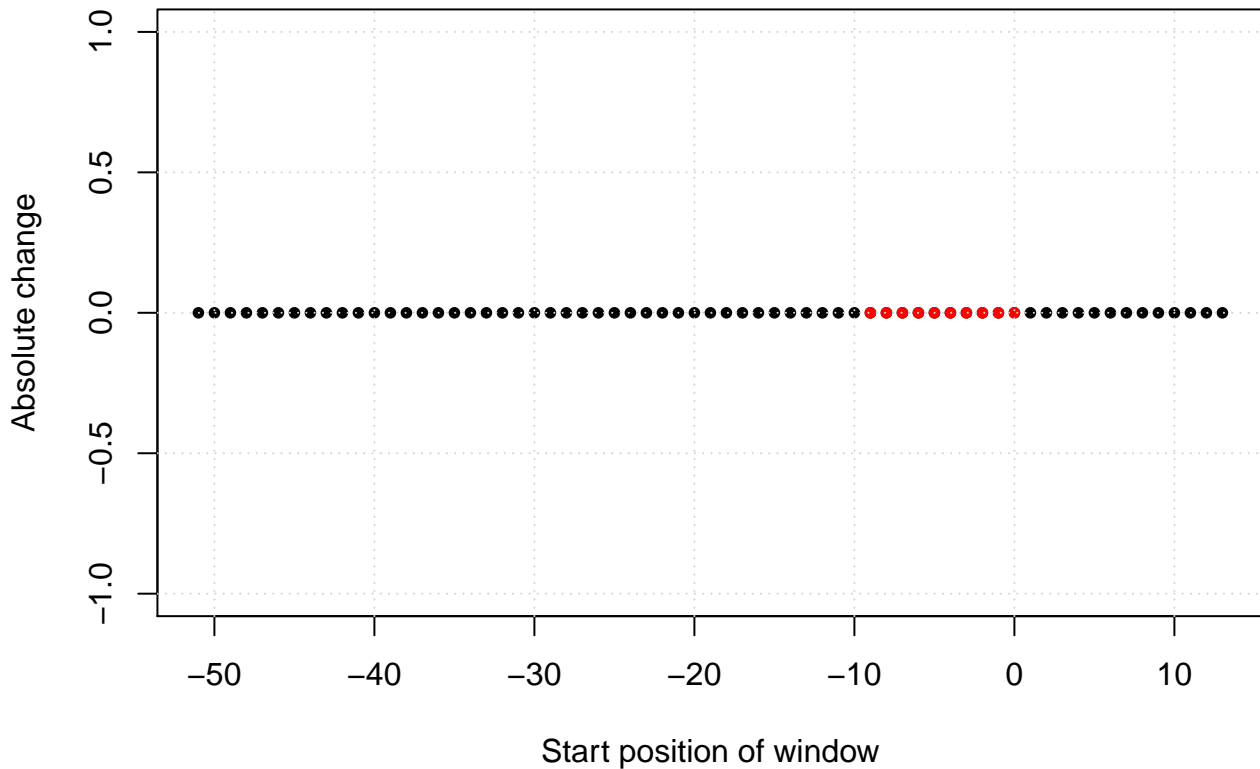

# P01A PercentageOfEosinophils Window Size = 10

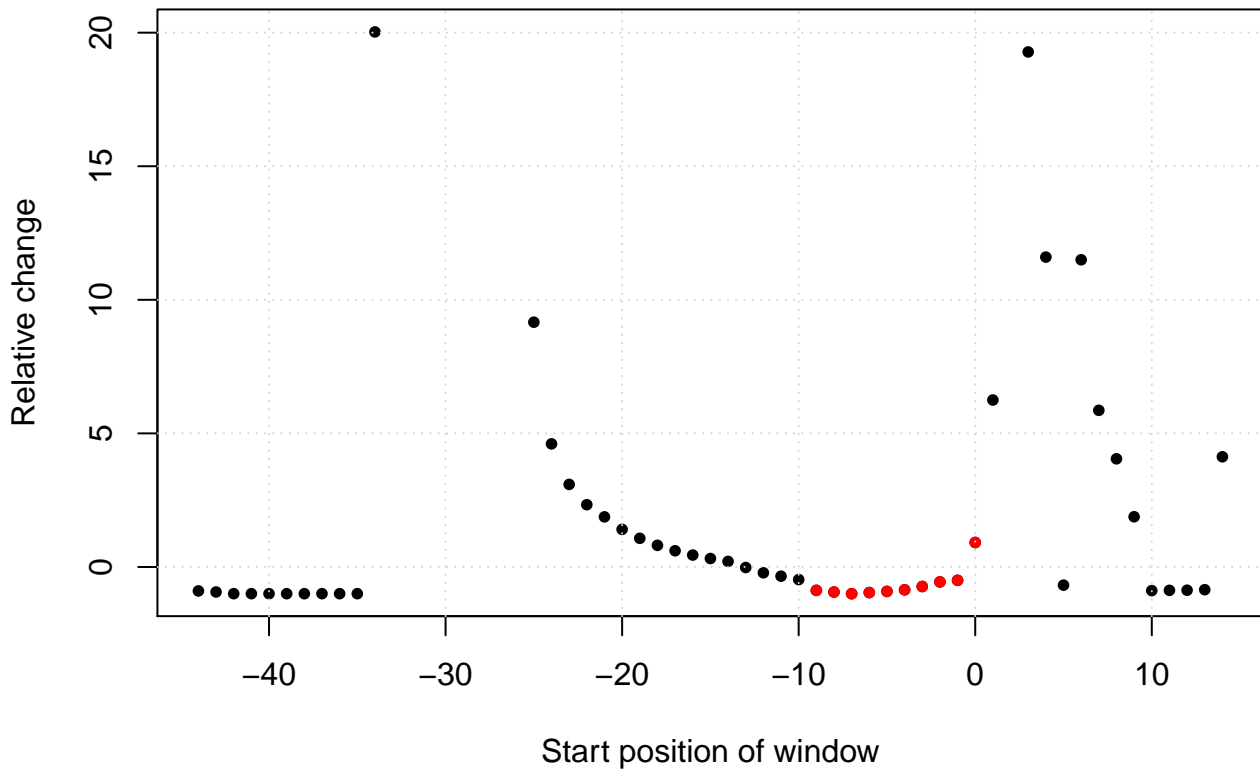

## P02A PercentageOfEosinophils Window Size = 10

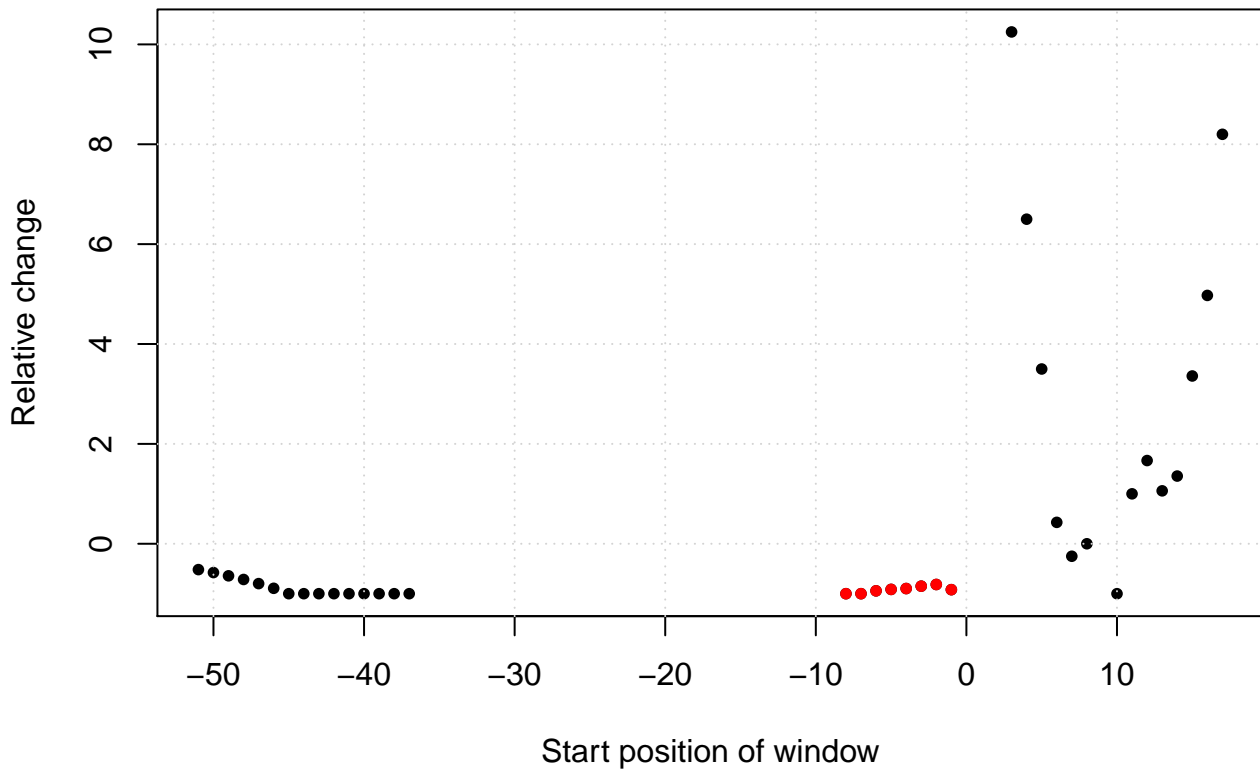

# P04A PercentageOfEosinophils Window Size = 10

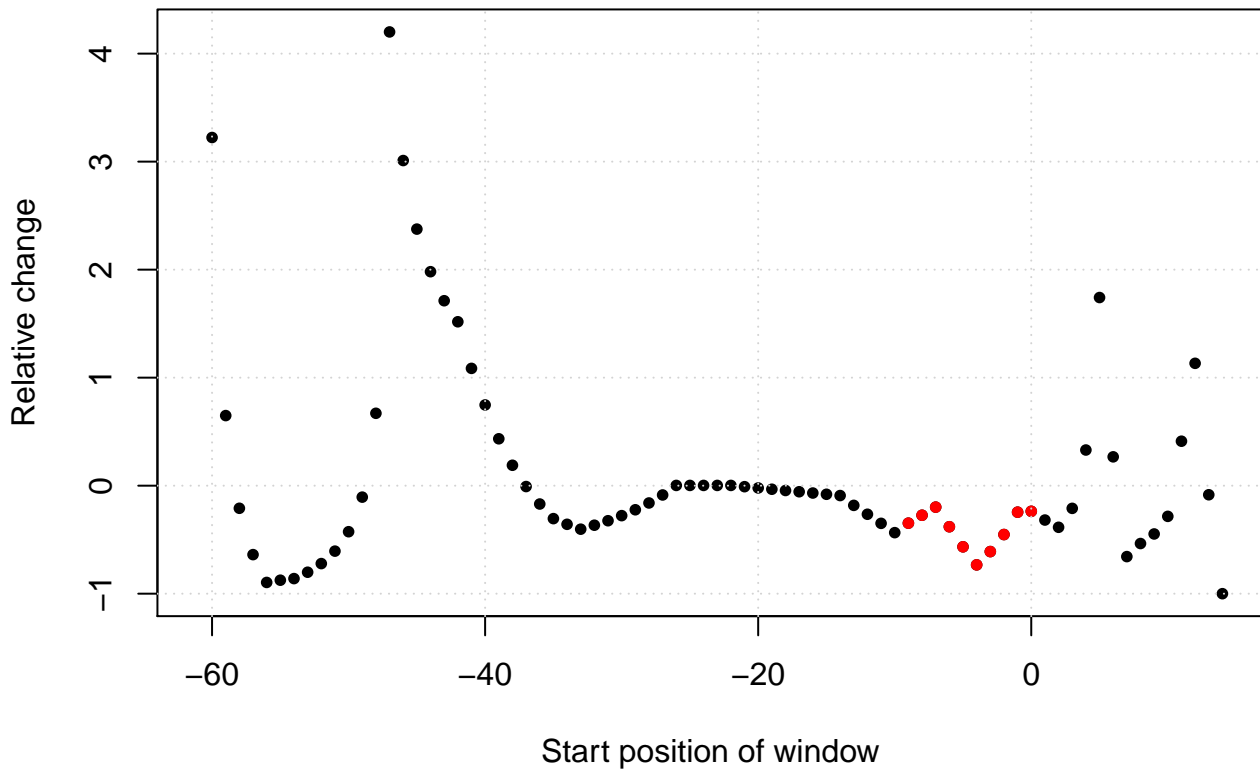



## P05A PercentageOfEosinophils Window Size = 10

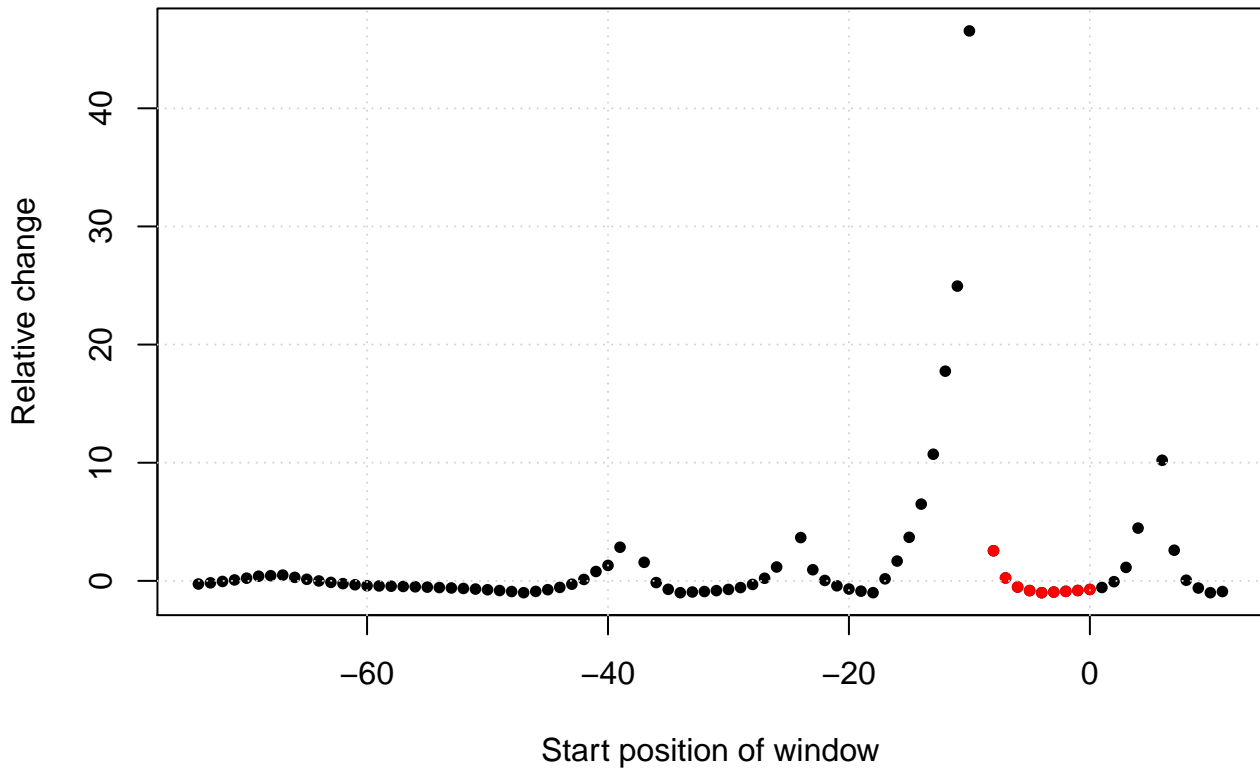

## P06A PercentageOfEosinophils Window Size = 10

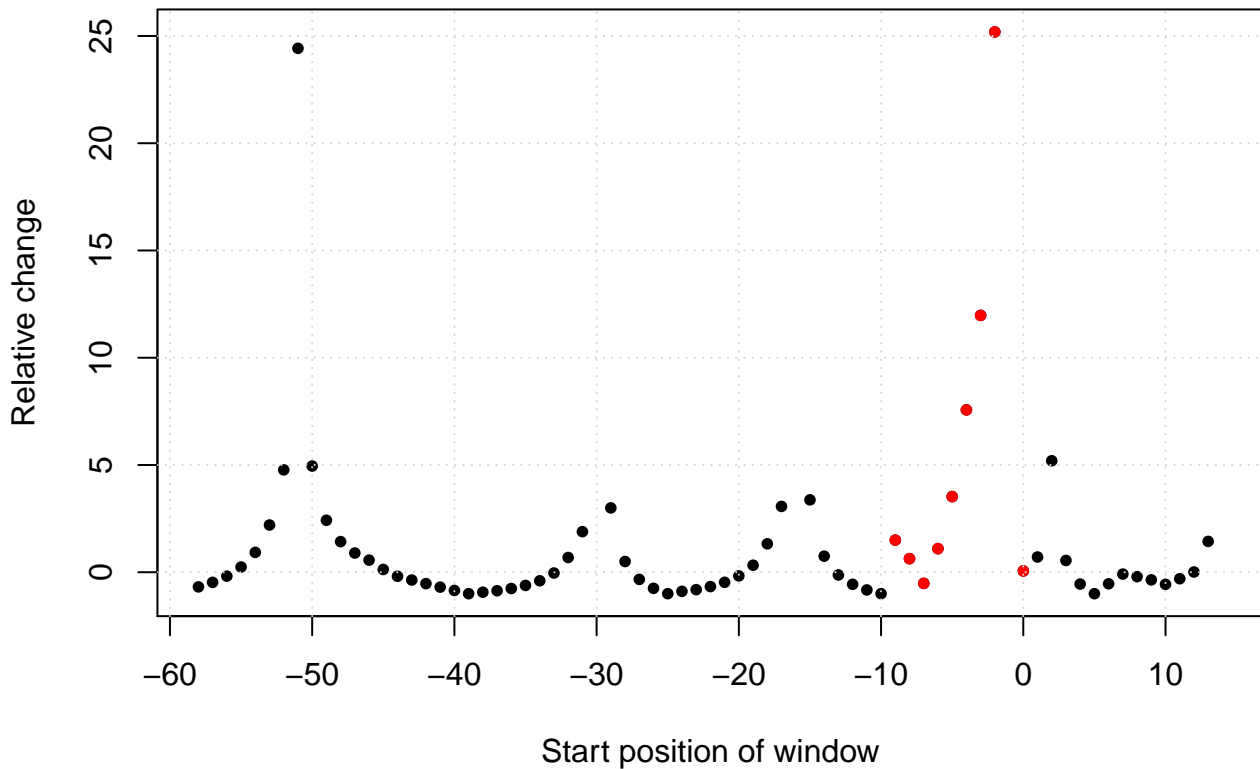

## P07A PercentageOfEosinophils Window Size = 10

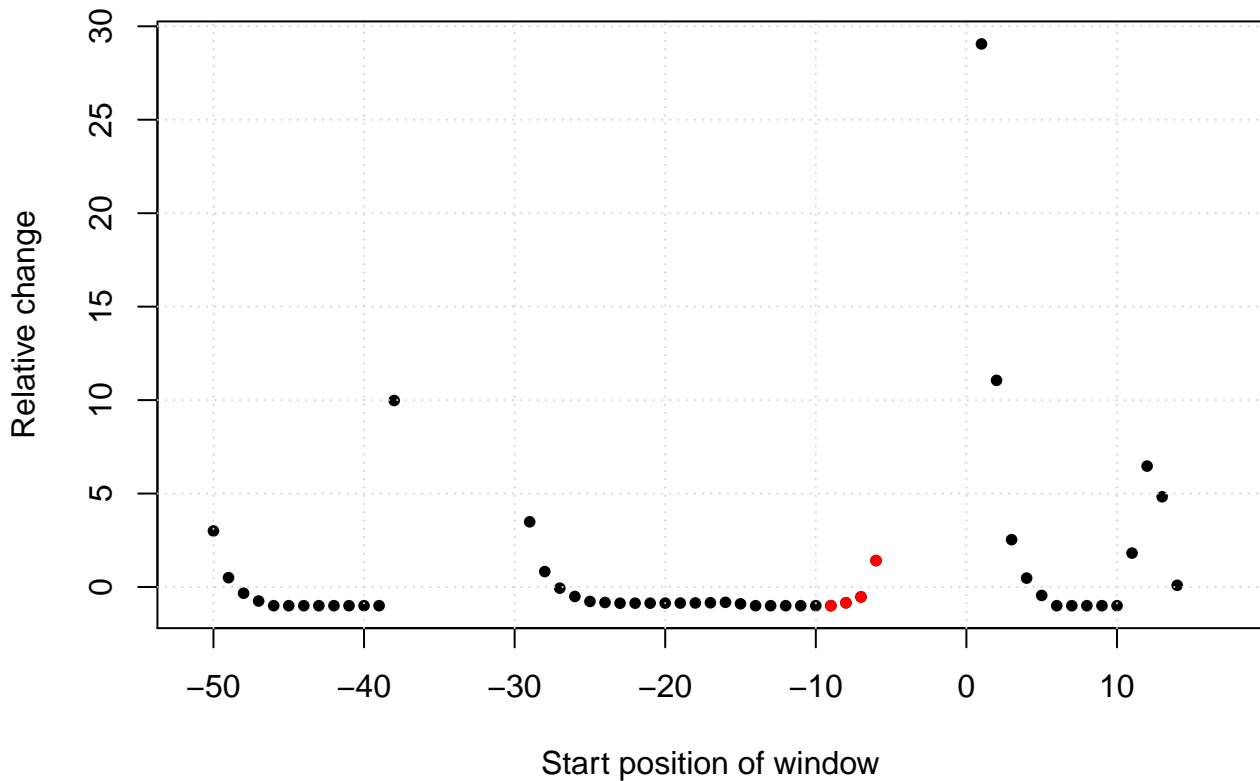

## P08A PercentageOfEosinophils Window Size = 10

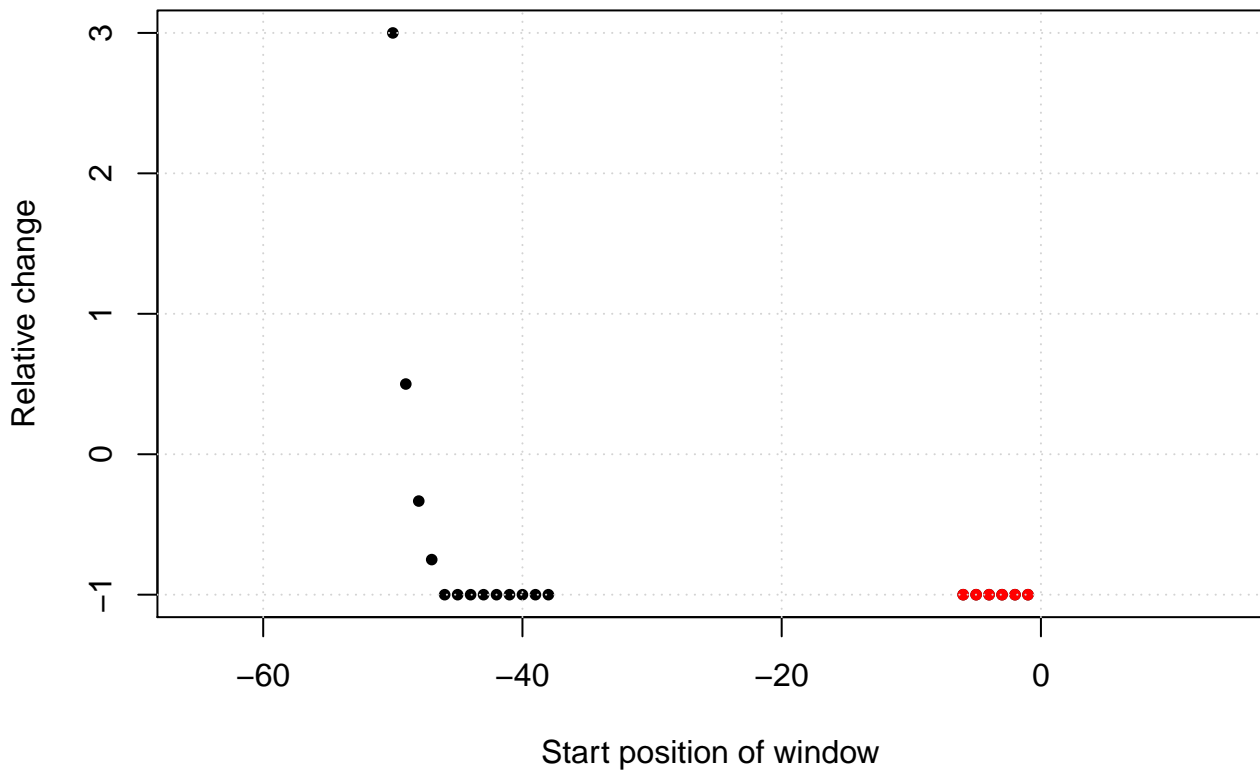

# P09A PercentageOfEosinophils Window Size = 10

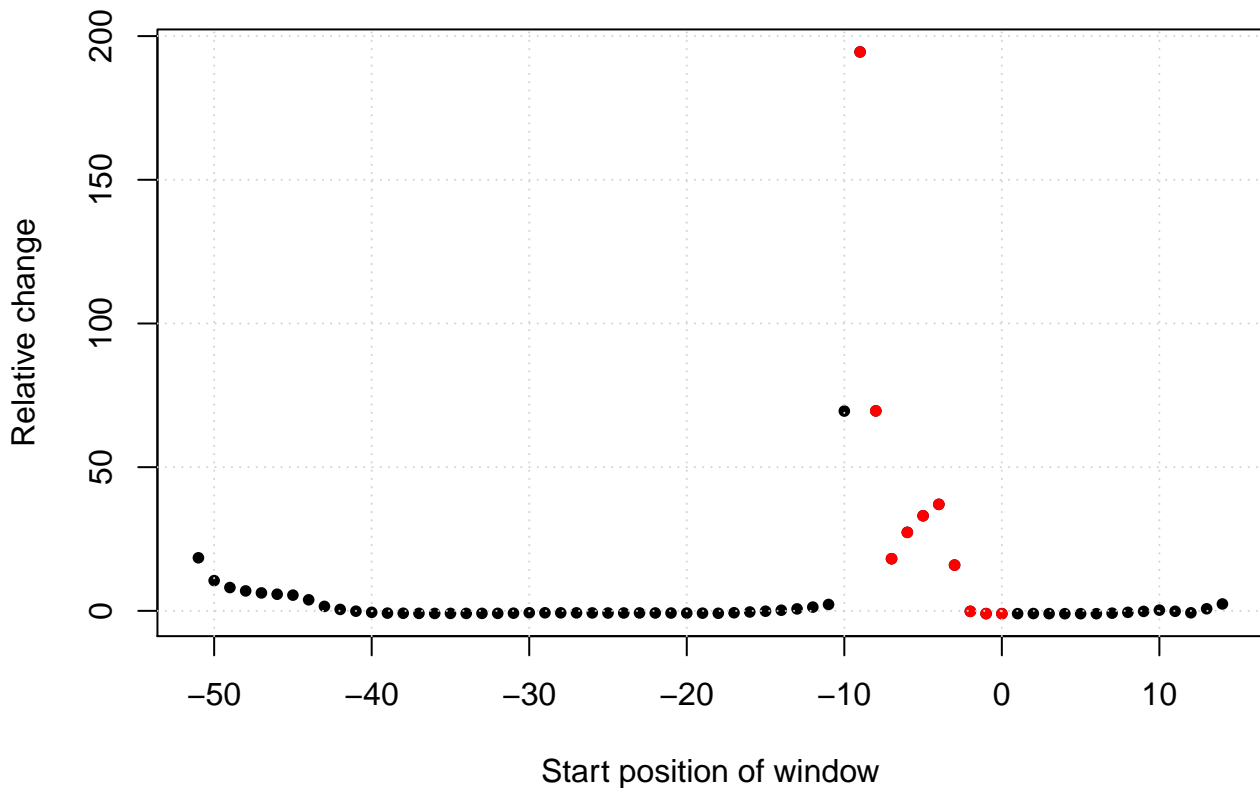

# P10A PercentageOfEosinophils Window Size = 10

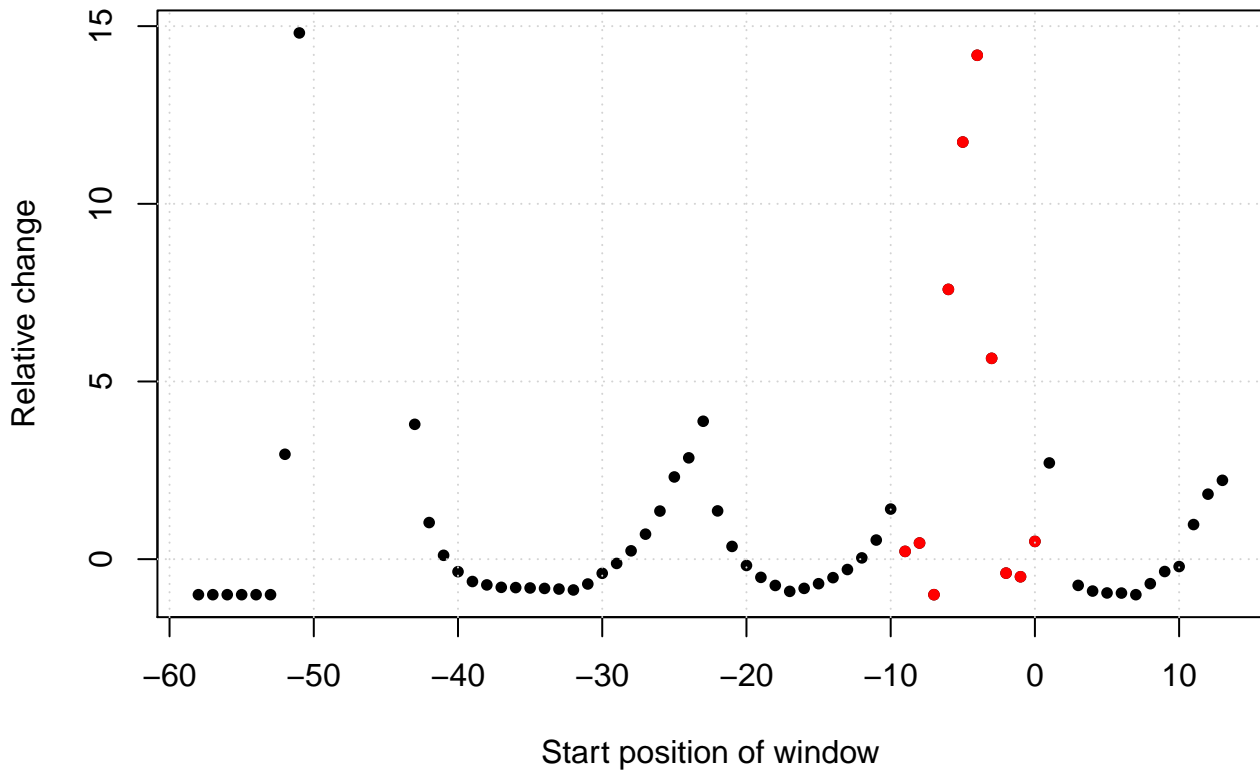

## P11A PercentageOfEosinophils Window Size = 10

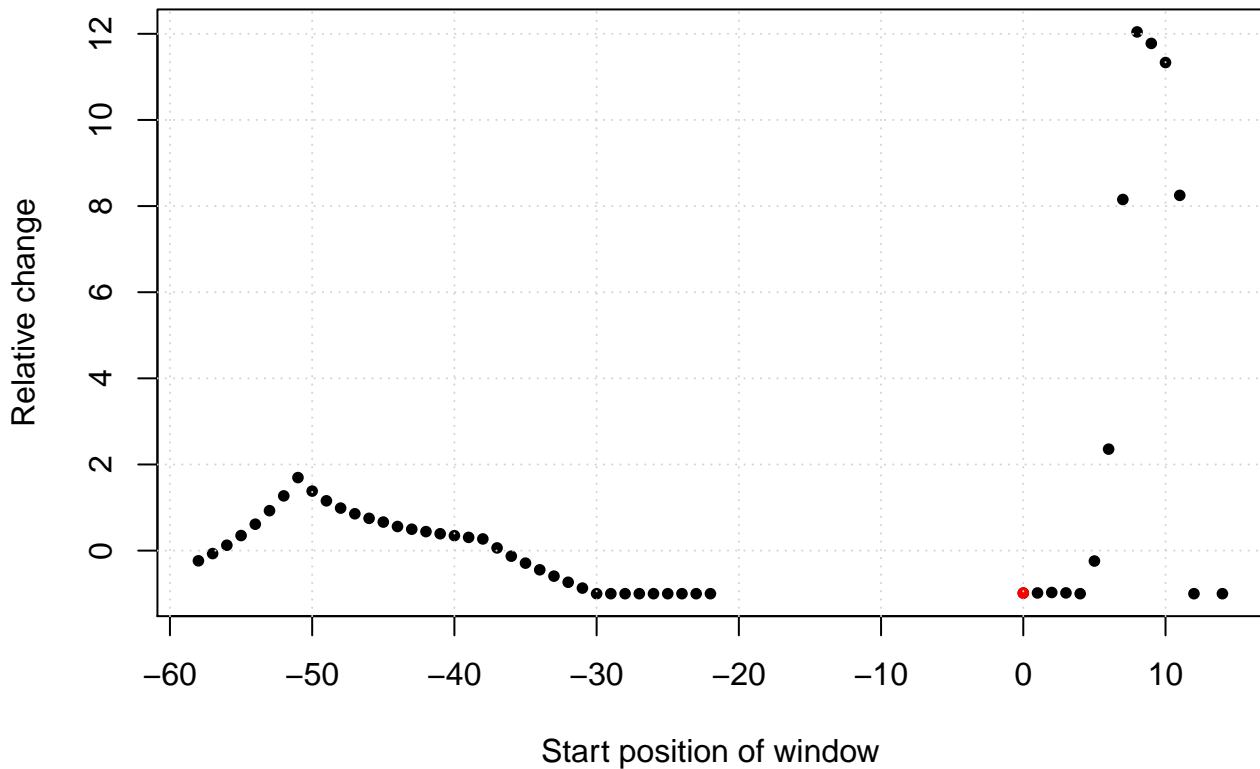

## P12A PercentageOfEosinophils Window Size = 10

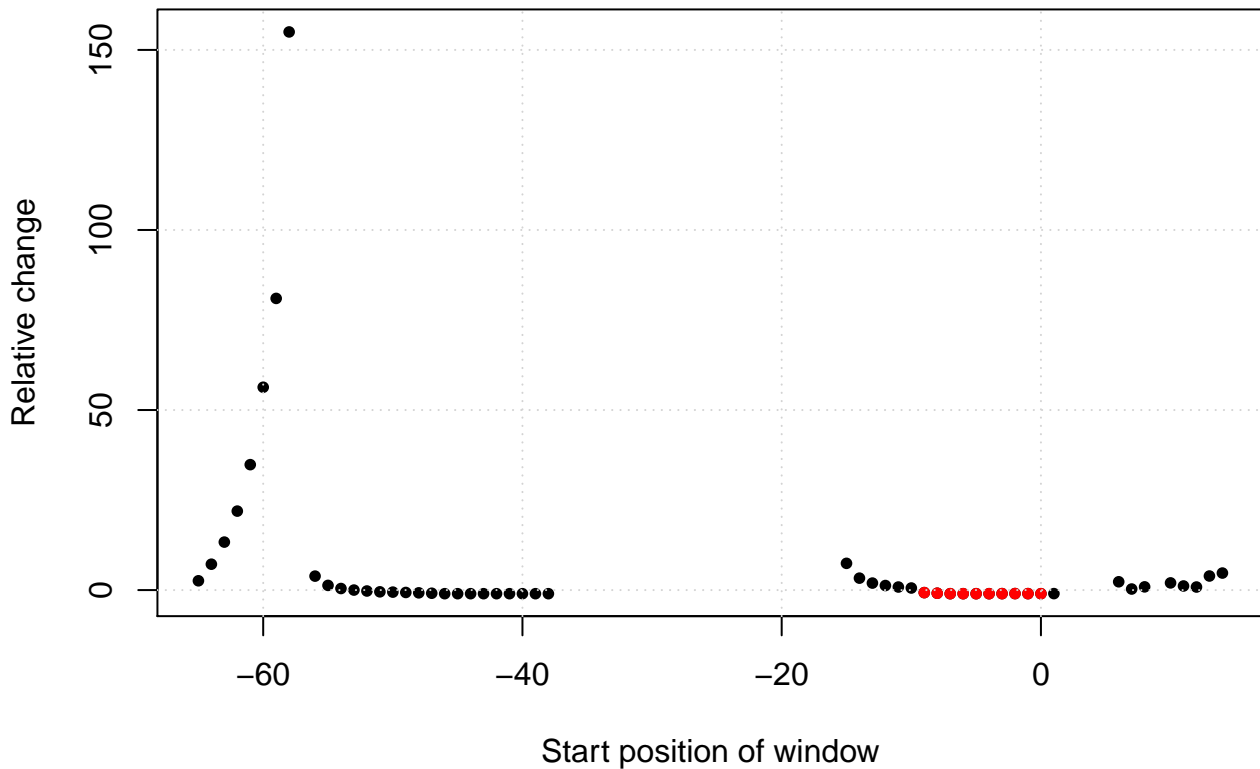



# P13A PercentageOfEosinophils Window Size = 10

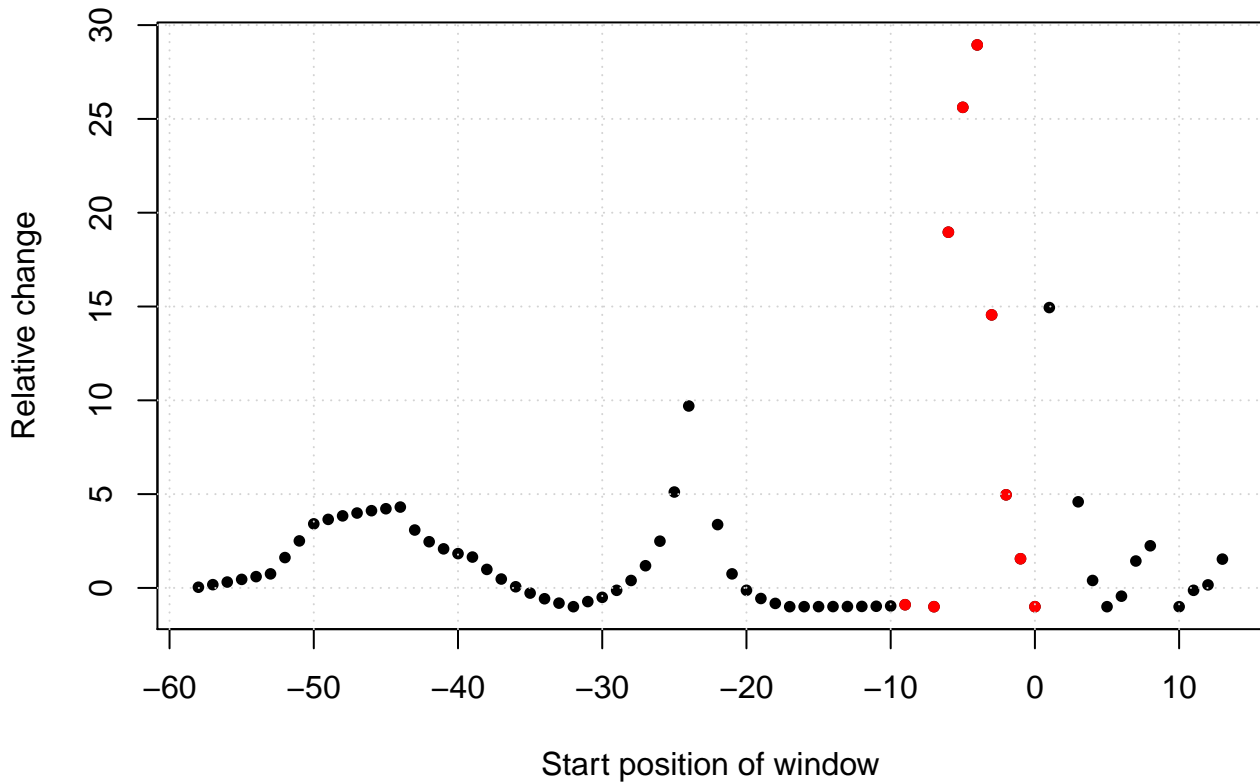

# P01H PercentageOfNeutrophils Window Size = 10

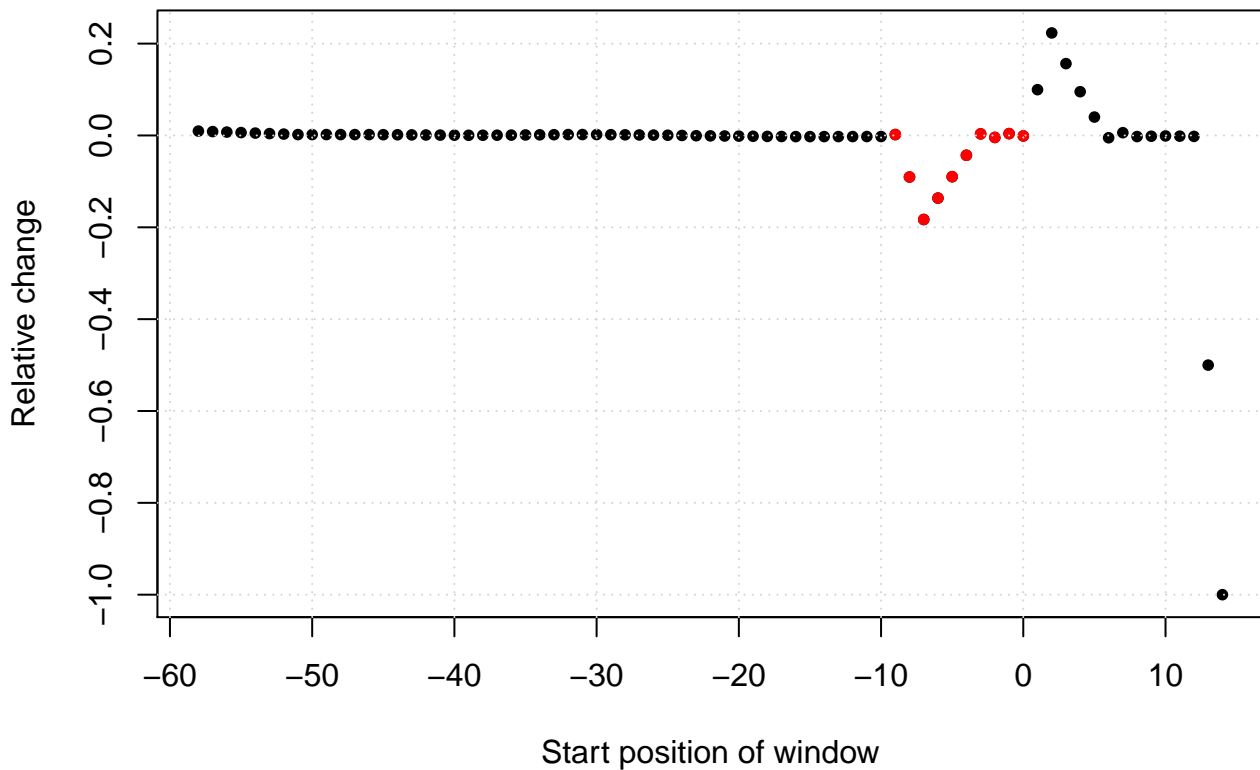

# P03H PercentageOfNeutrophils Window Size = 10

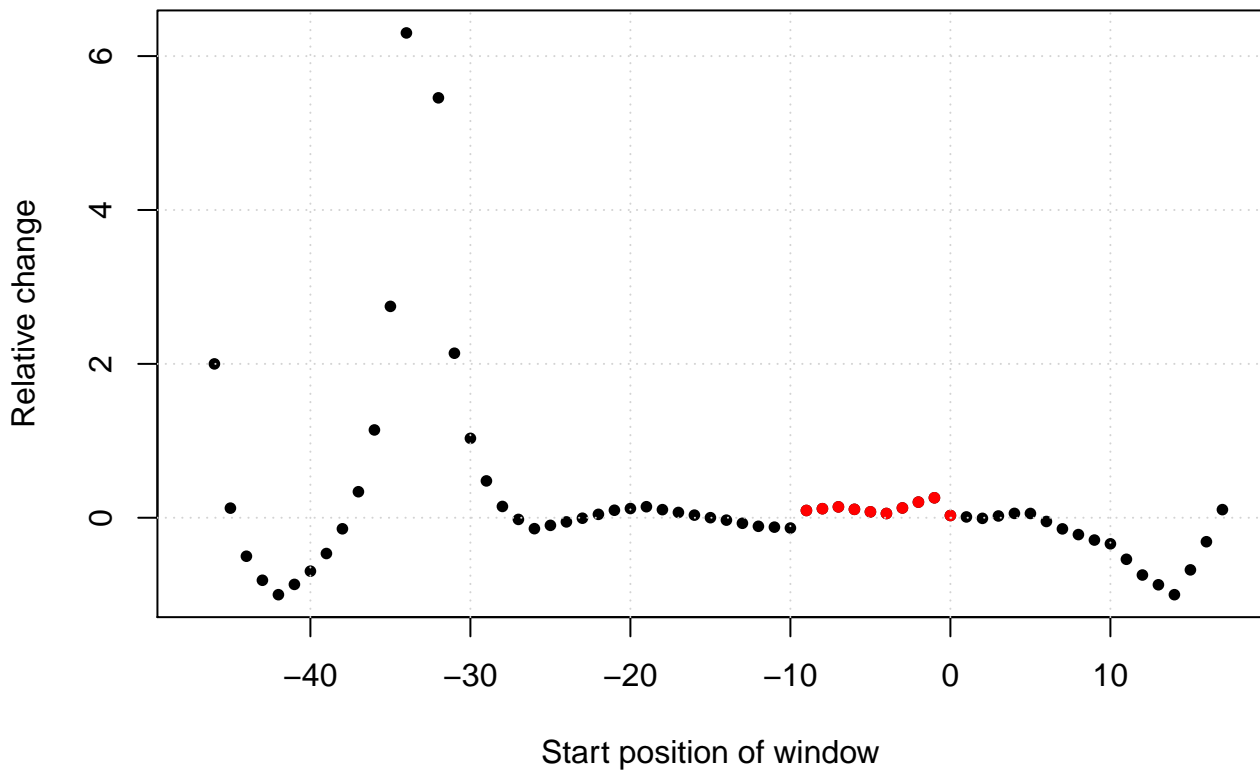

# P05H PercentageOfNeutrophils Window Size = 10

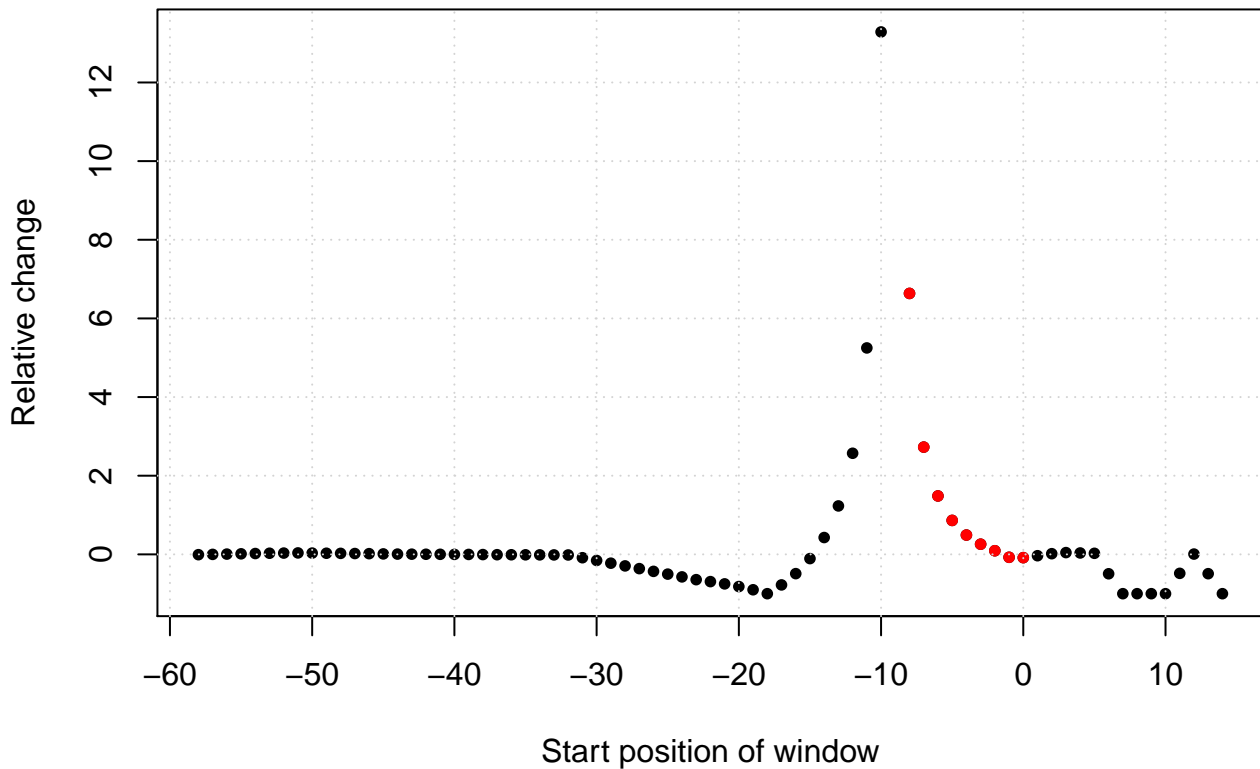

## P06H PercentageOfNeutrophils Window Size = 10

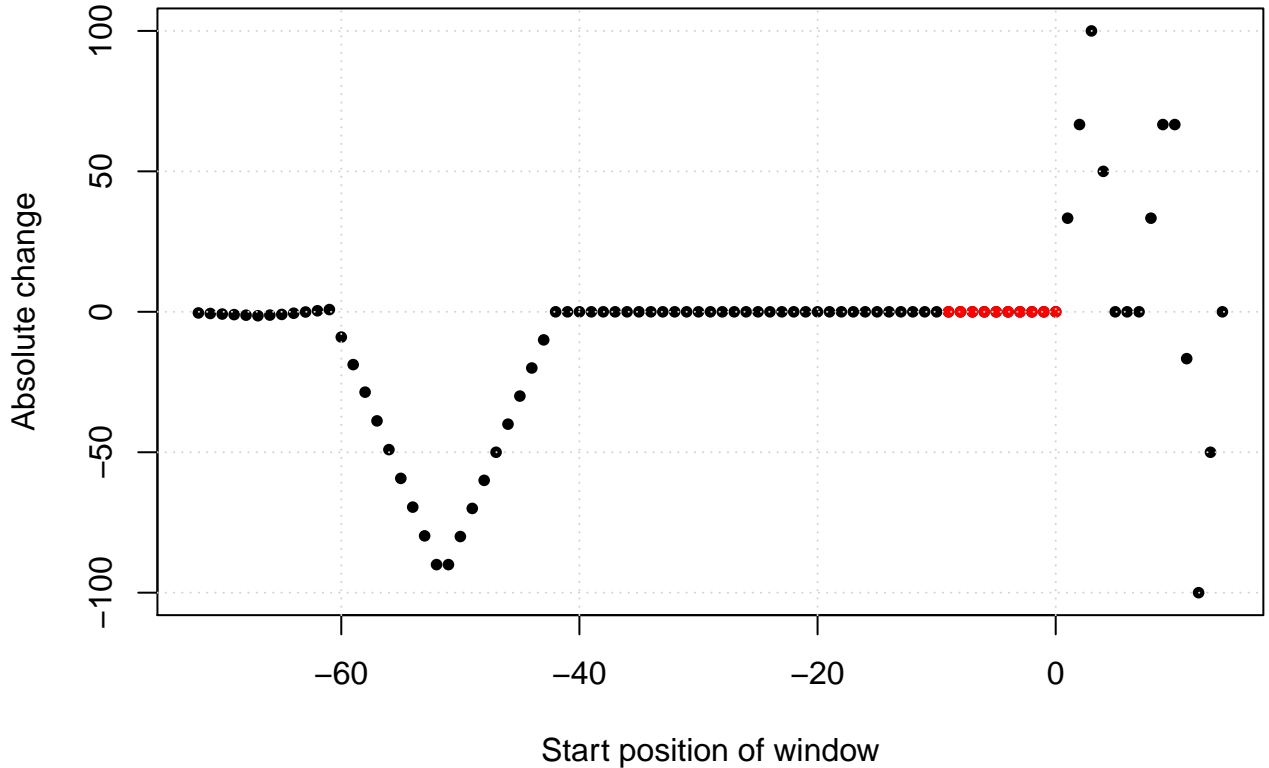

## P07H PercentageOfNeutrophils Window Size = 10

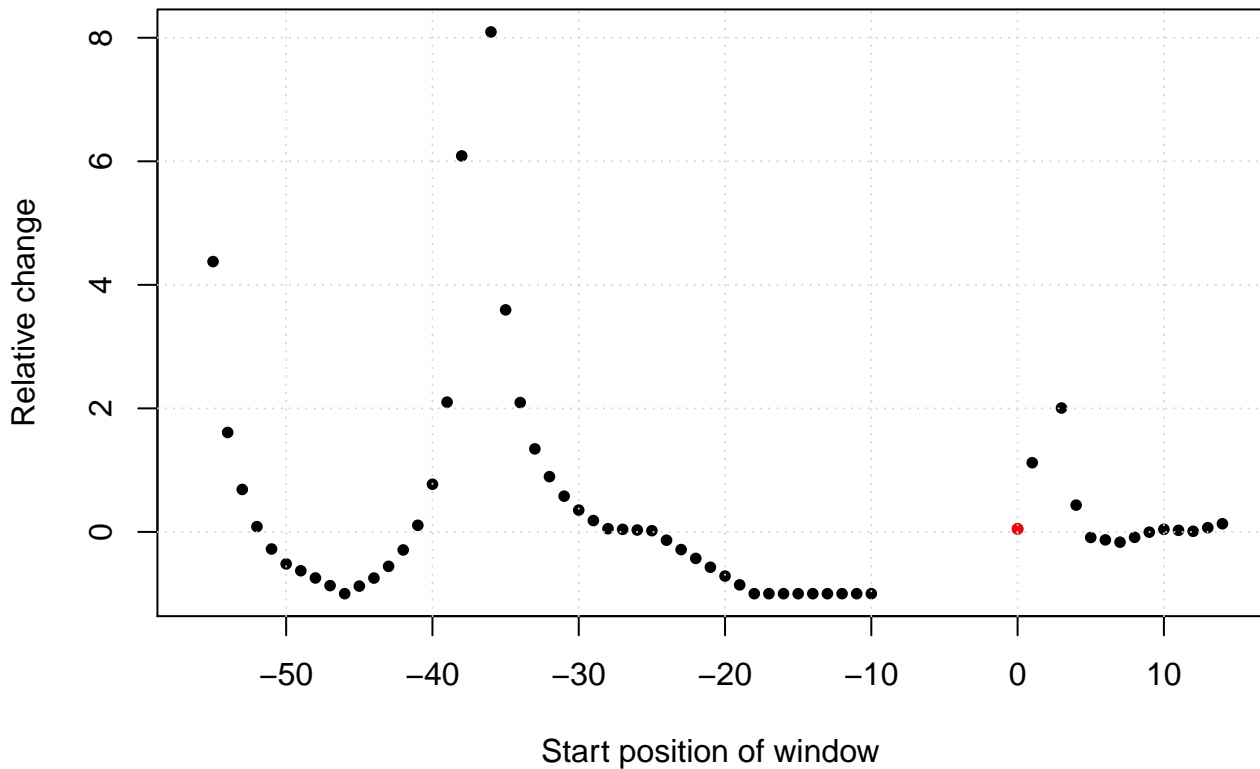

## P08H PercentageOfNeutrophils Window Size = 10

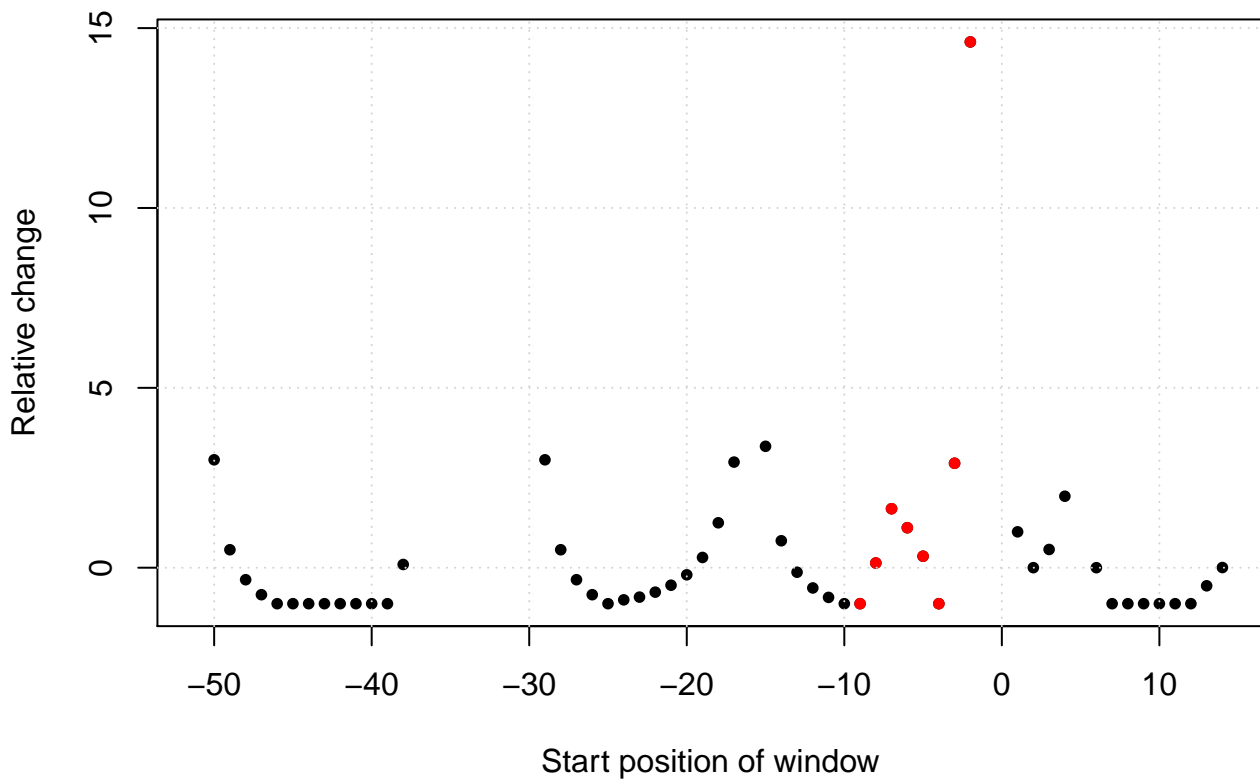

# P09H PercentageOfNeutrophils Window Size = 10

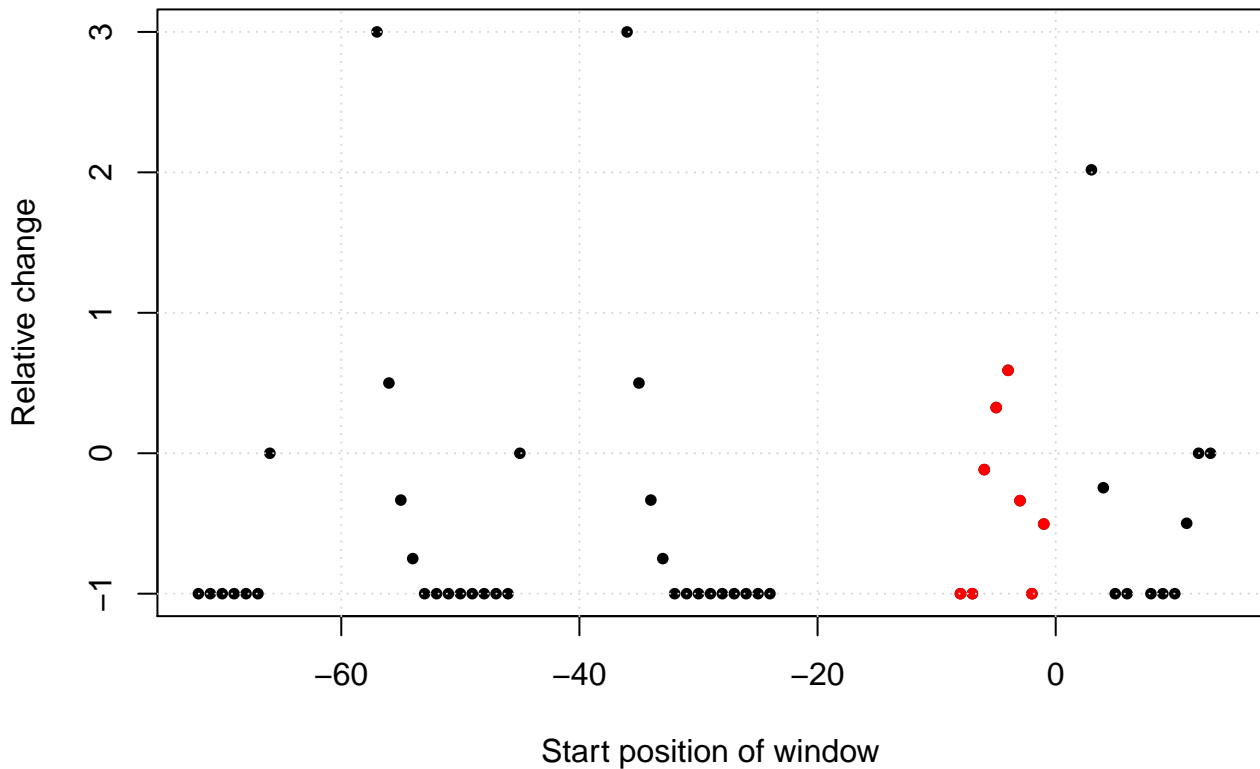



# P11H PercentageOfNeutrophils Window Size = 10

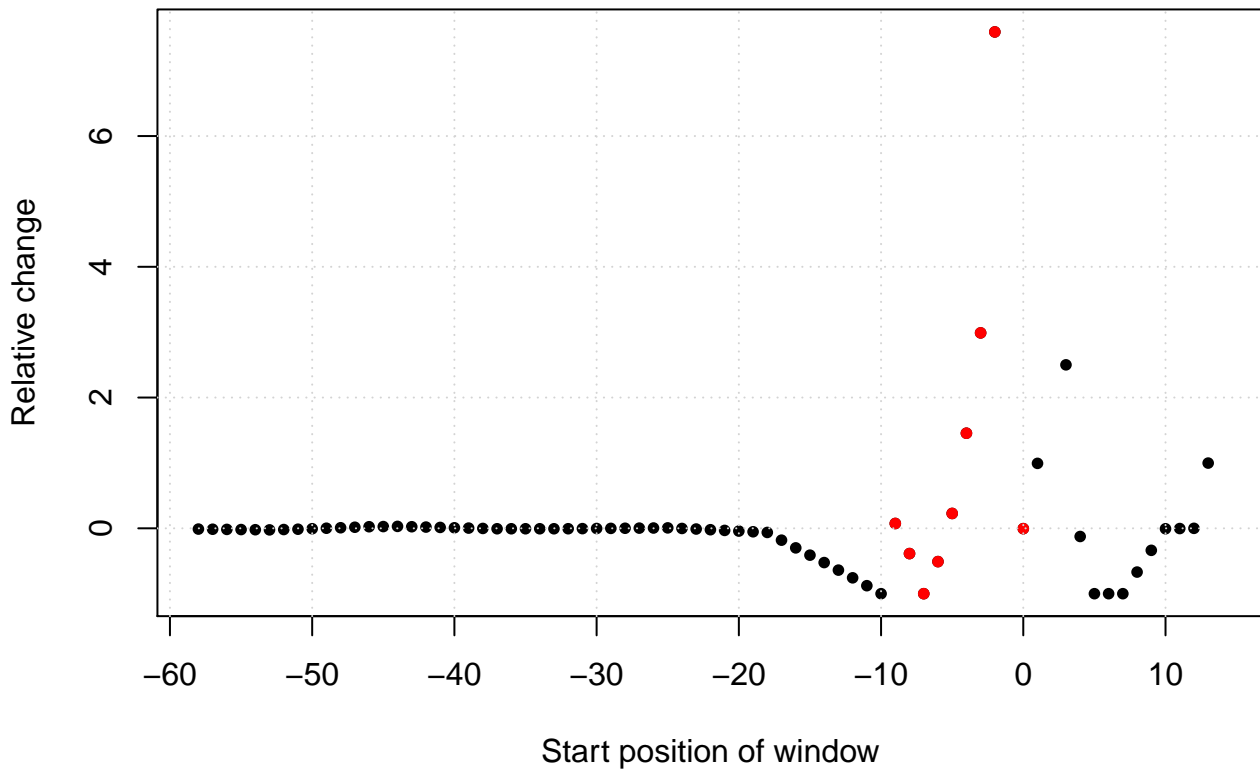

# P12H PercentageOfNeutrophils Window Size = 10

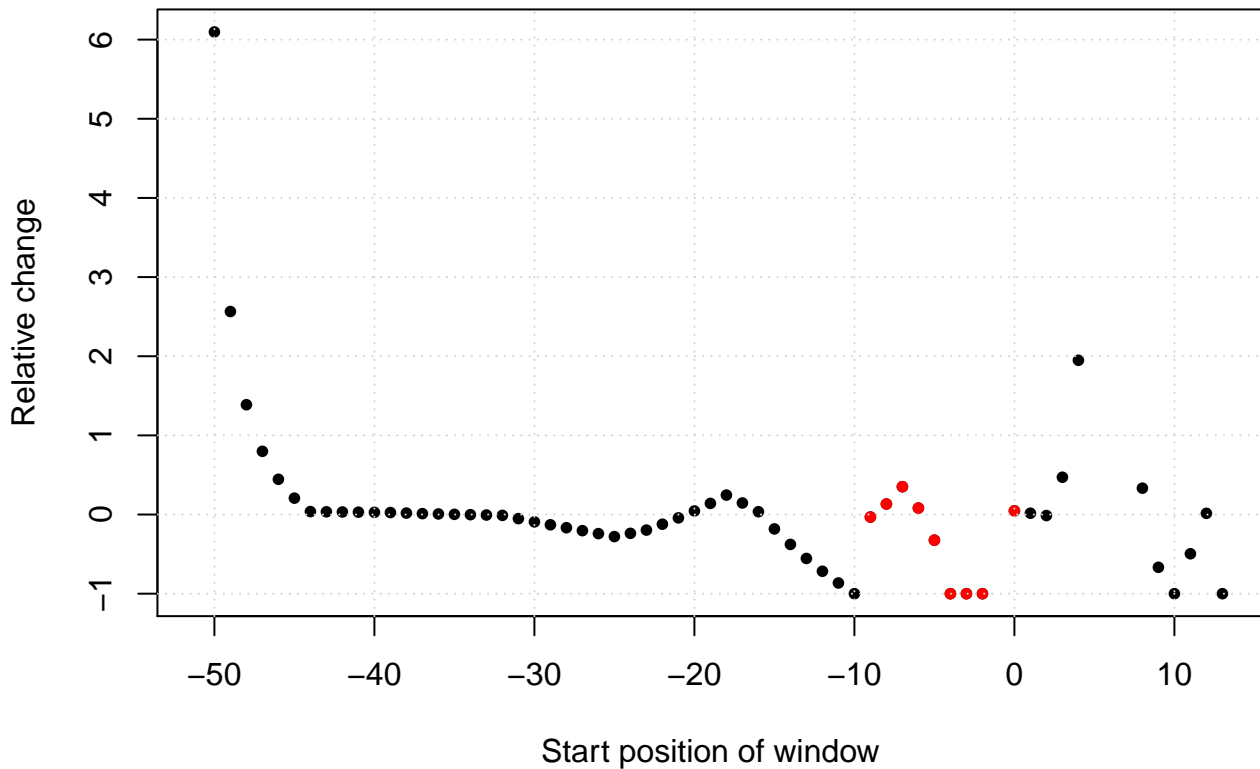

# P13H PercentageOfNeutrophils Window Size = 10

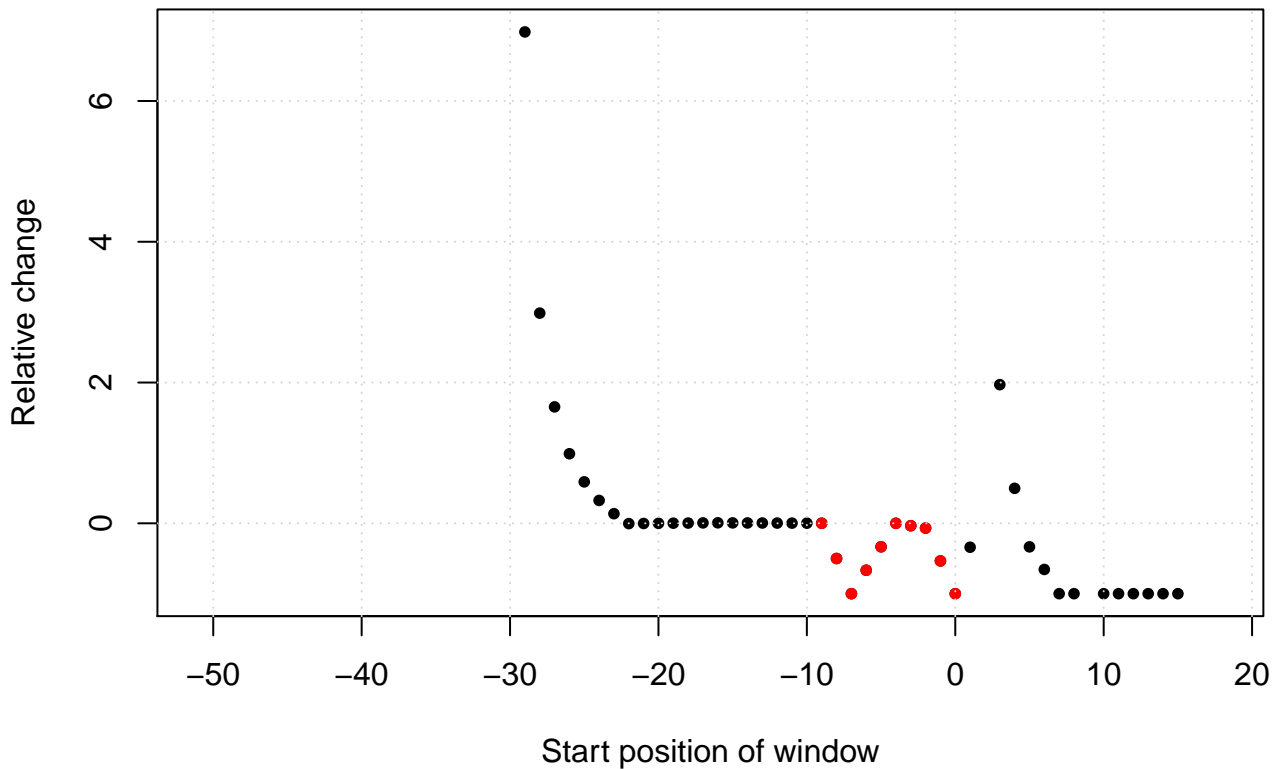

# P14H PercentageOfNeutrophils Window Size = 10

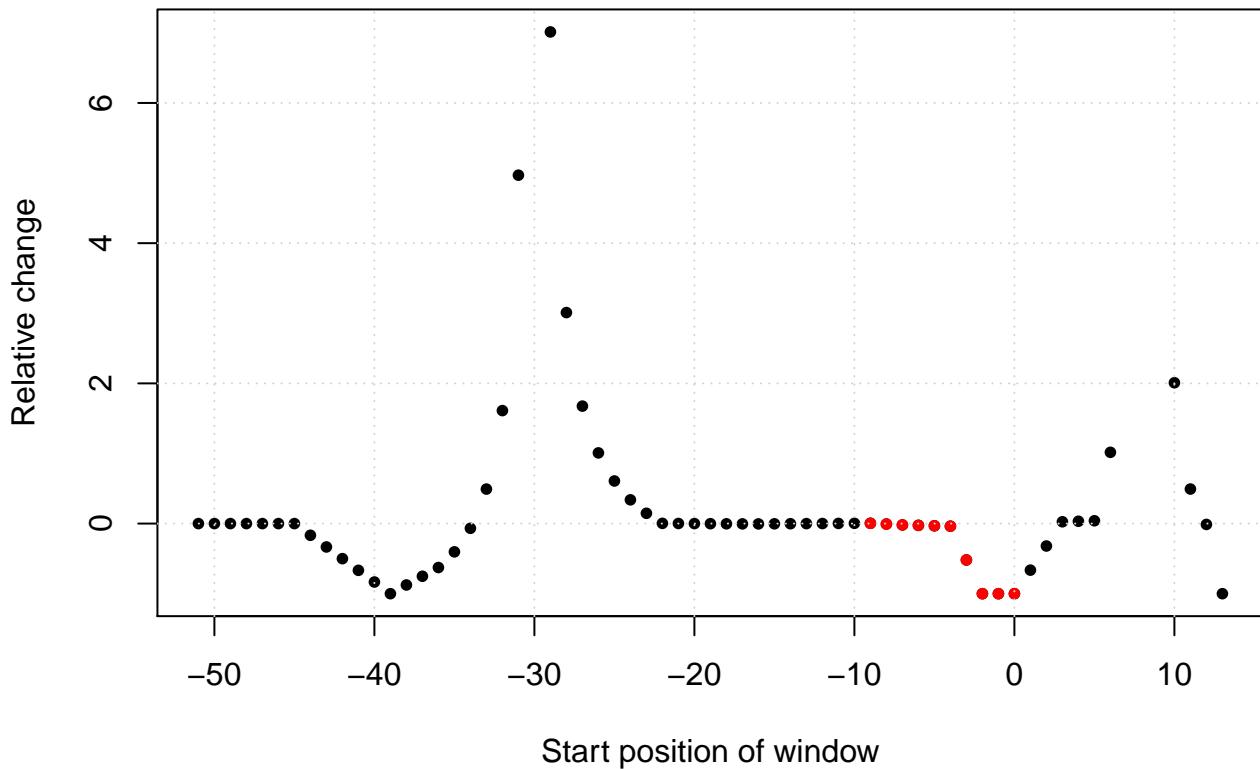

# P15H PercentageOfNeutrophils Window Size = 10

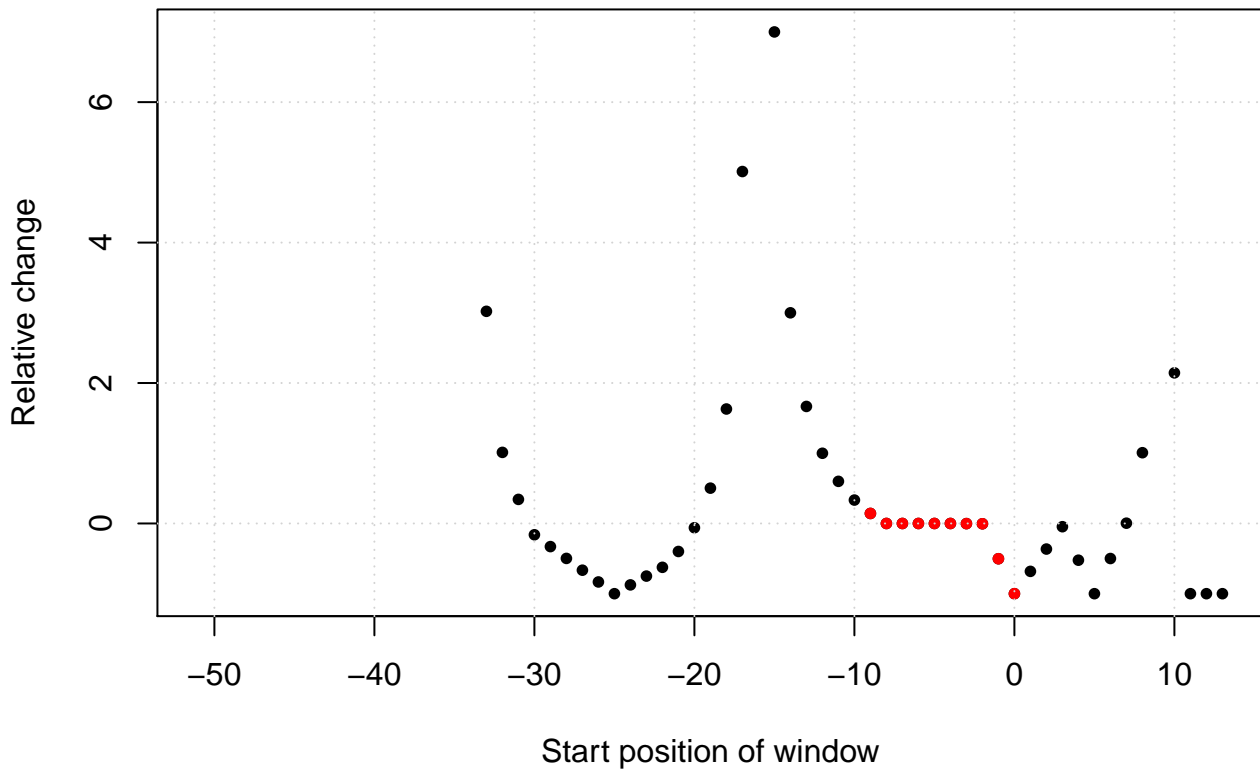

# P01A PercentageOfNeutrophils Window Size = 10

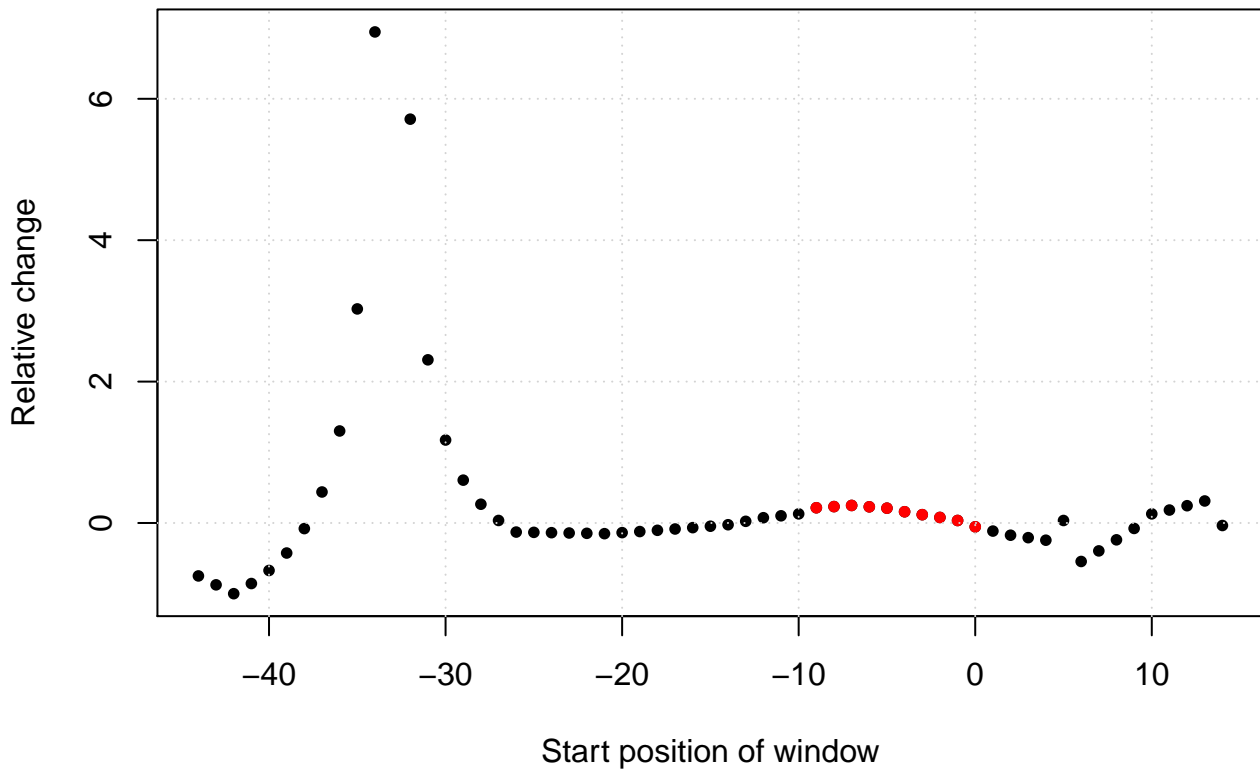

## P02A PercentageOfNeutrophils Window Size = 10

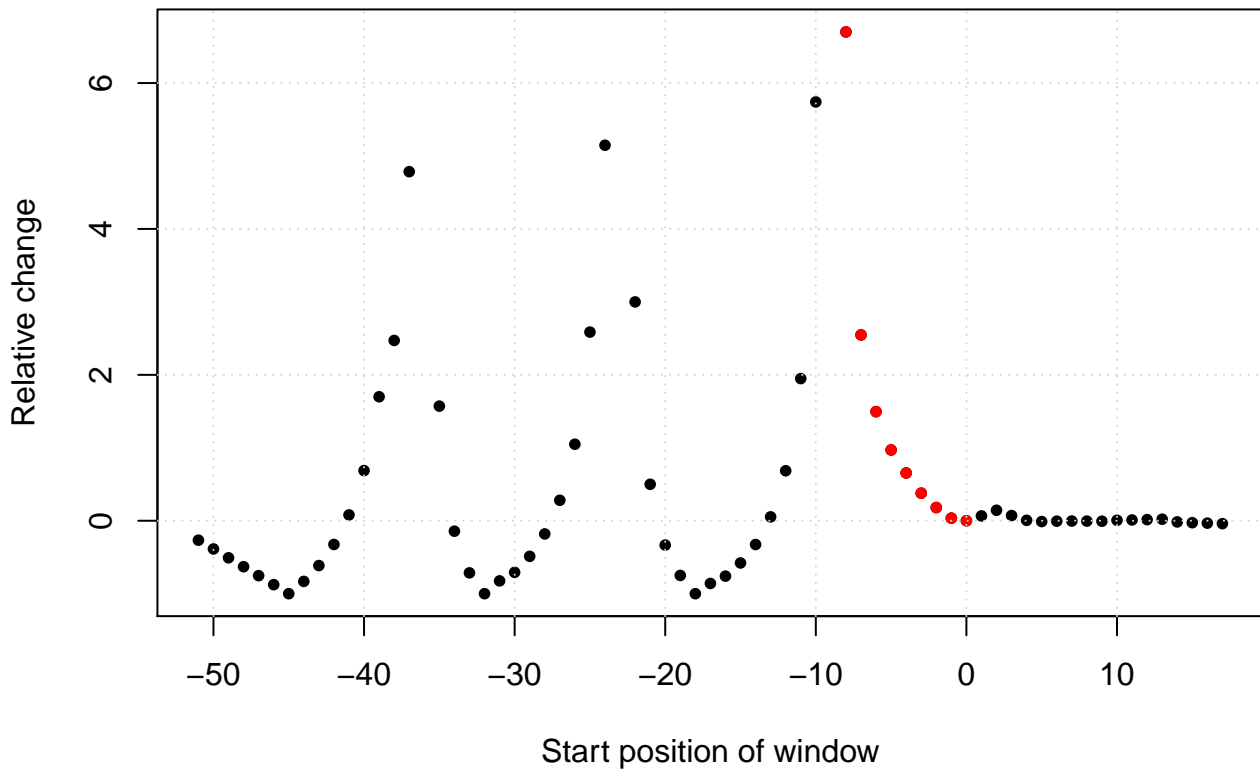

# P04A PercentageOfNeutrophils Window Size = 10

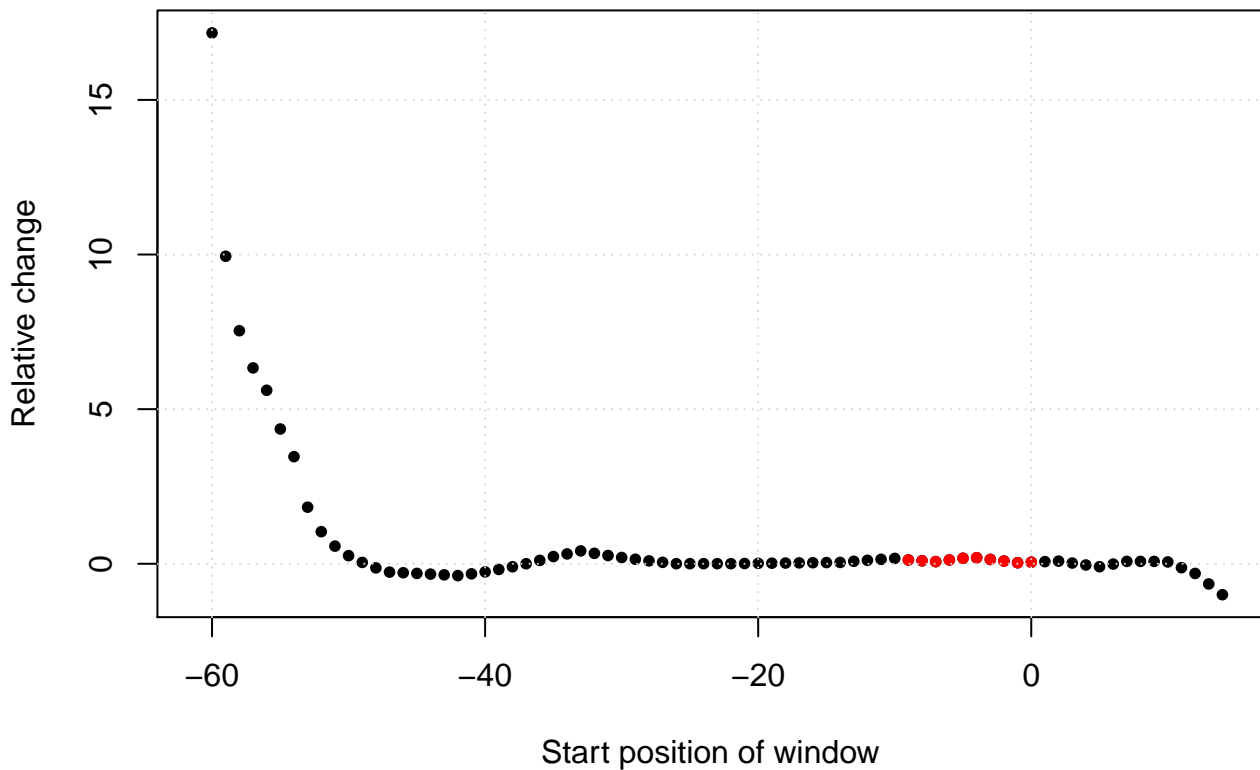



## P05A PercentageOfNeutrophils Window Size = 10

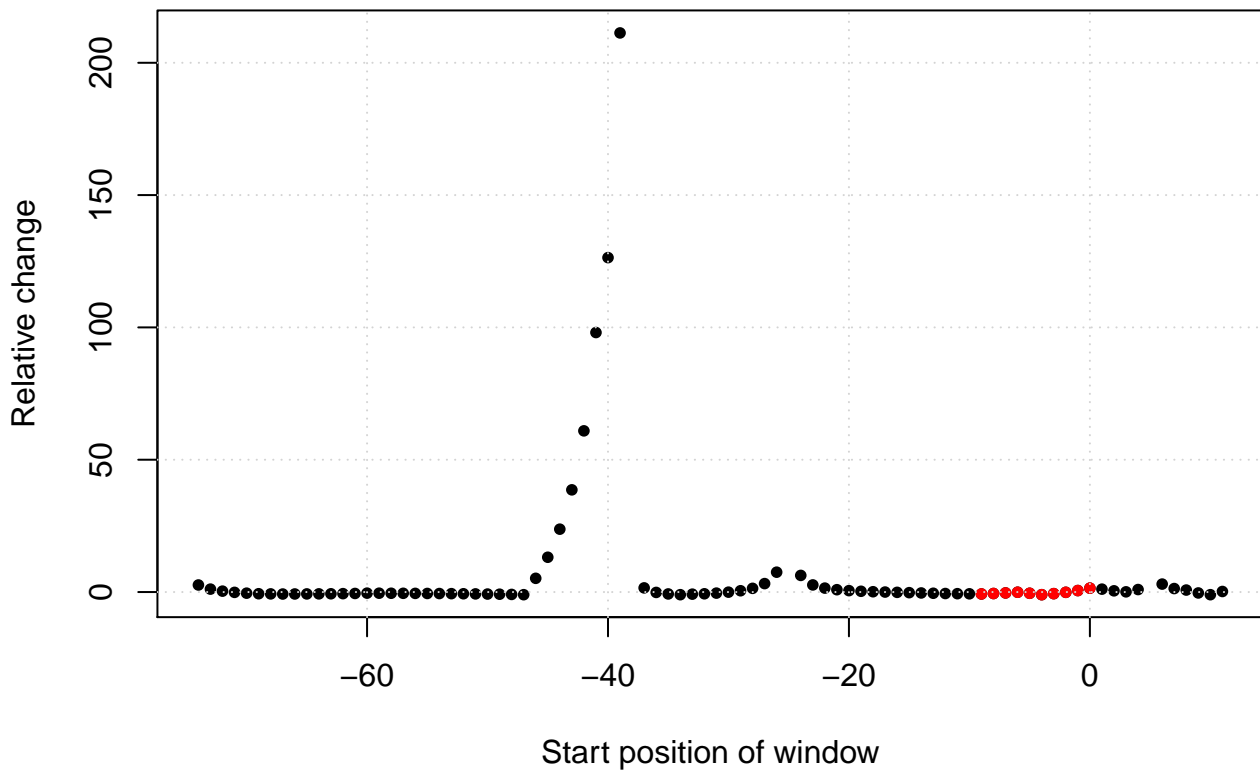

## P06A PercentageOfNeutrophils Window Size = 10

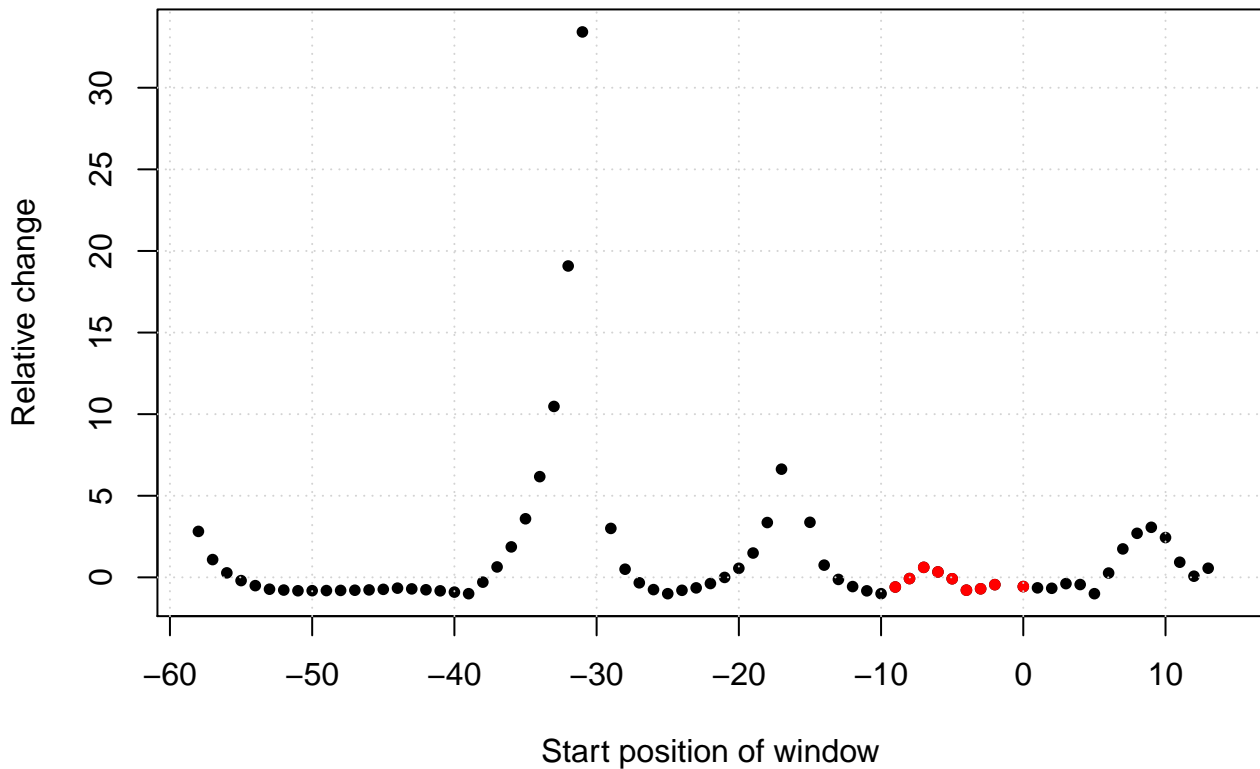

## P07A PercentageOfNeutrophils Window Size = 10

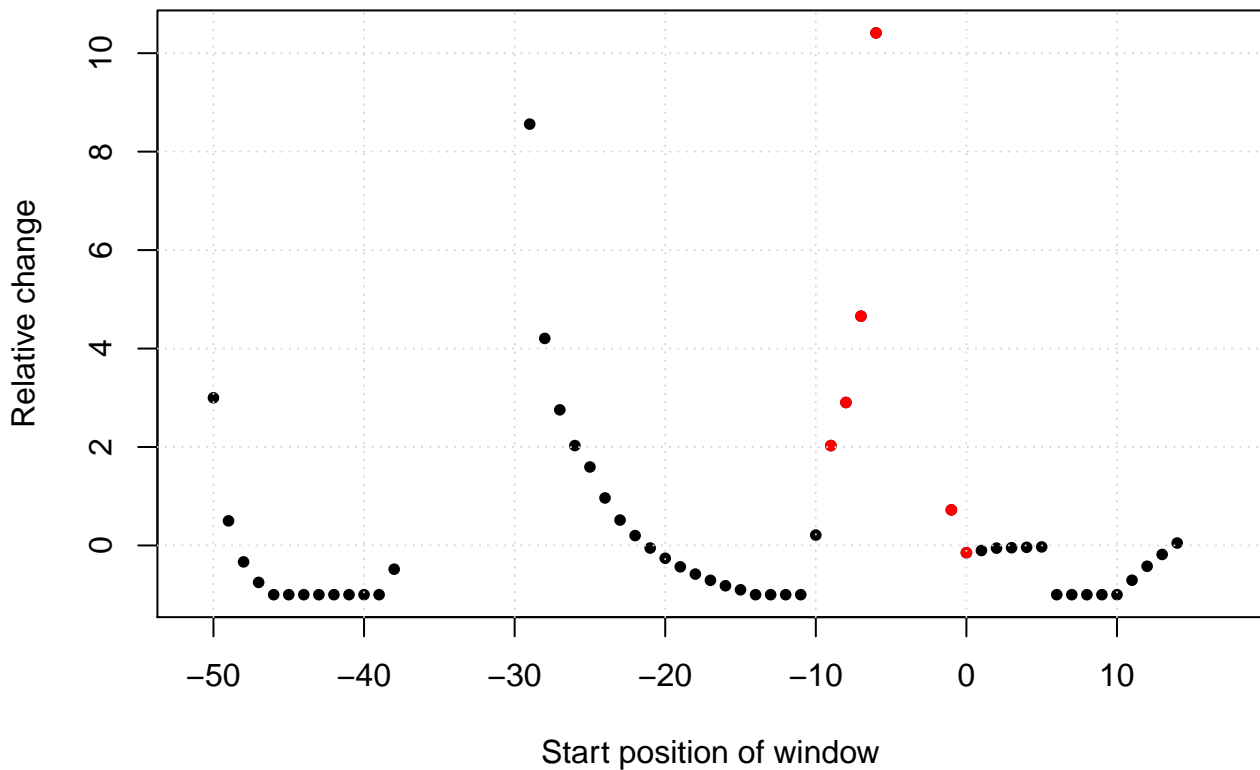

## P08A PercentageOfNeutrophils Window Size = 10

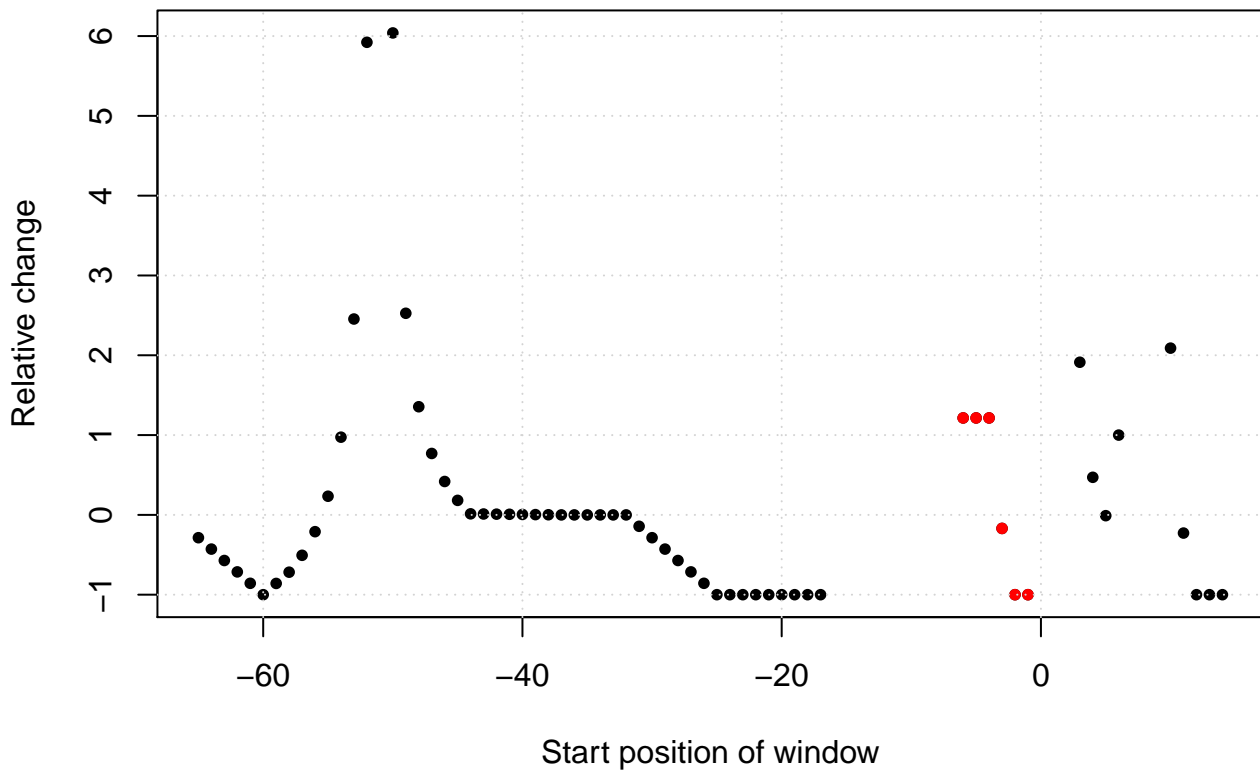

# P09A PercentageOfNeutrophils Window Size = 10

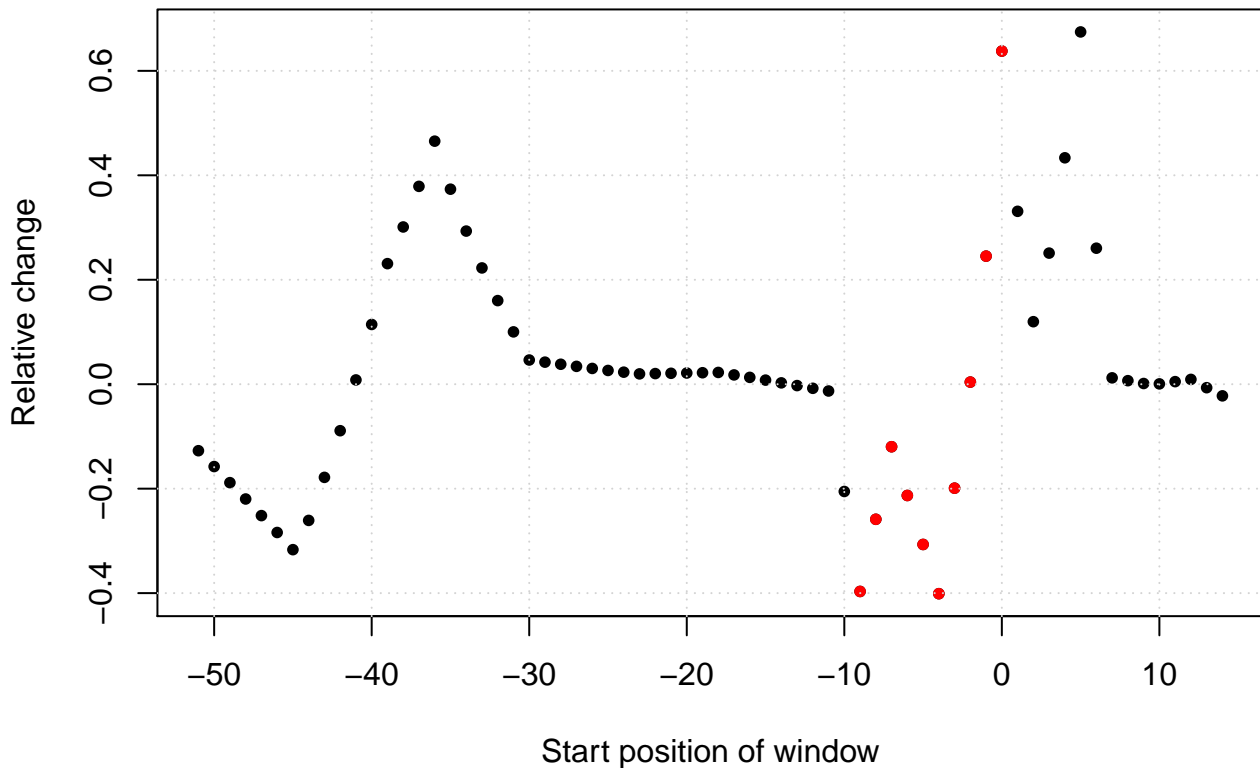

## P10A PercentageOfNeutrophils Window Size = 10

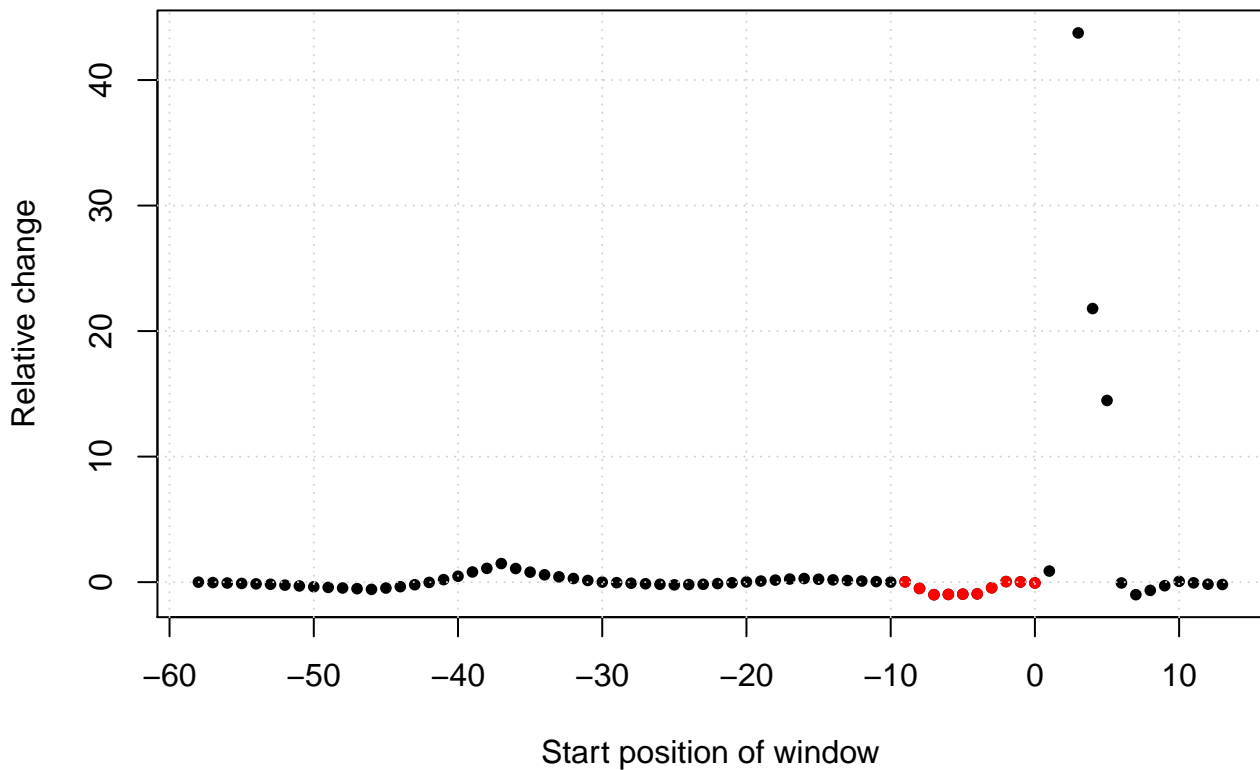

## P11A PercentageOfNeutrophils Window Size = 10

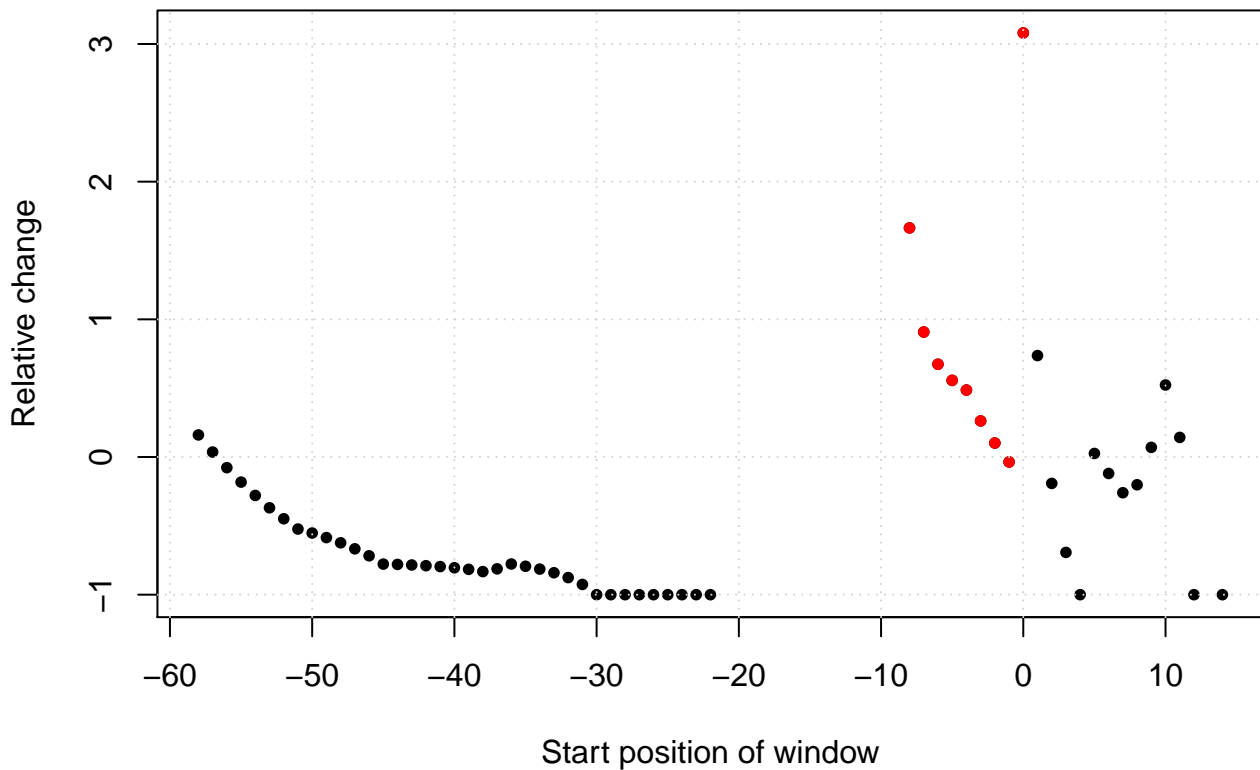

## P12A PercentageOfNeutrophils Window Size = 10

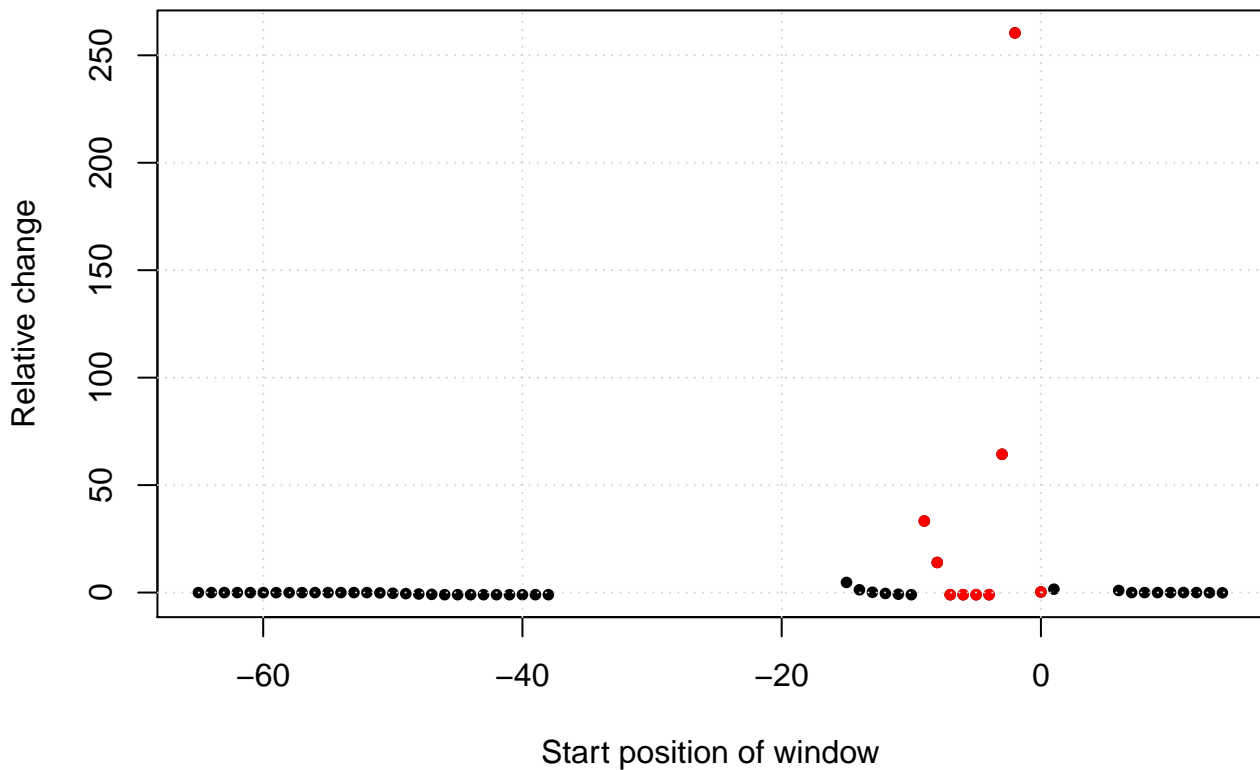



## P13A PercentageOfNeutrophils Window Size = 10

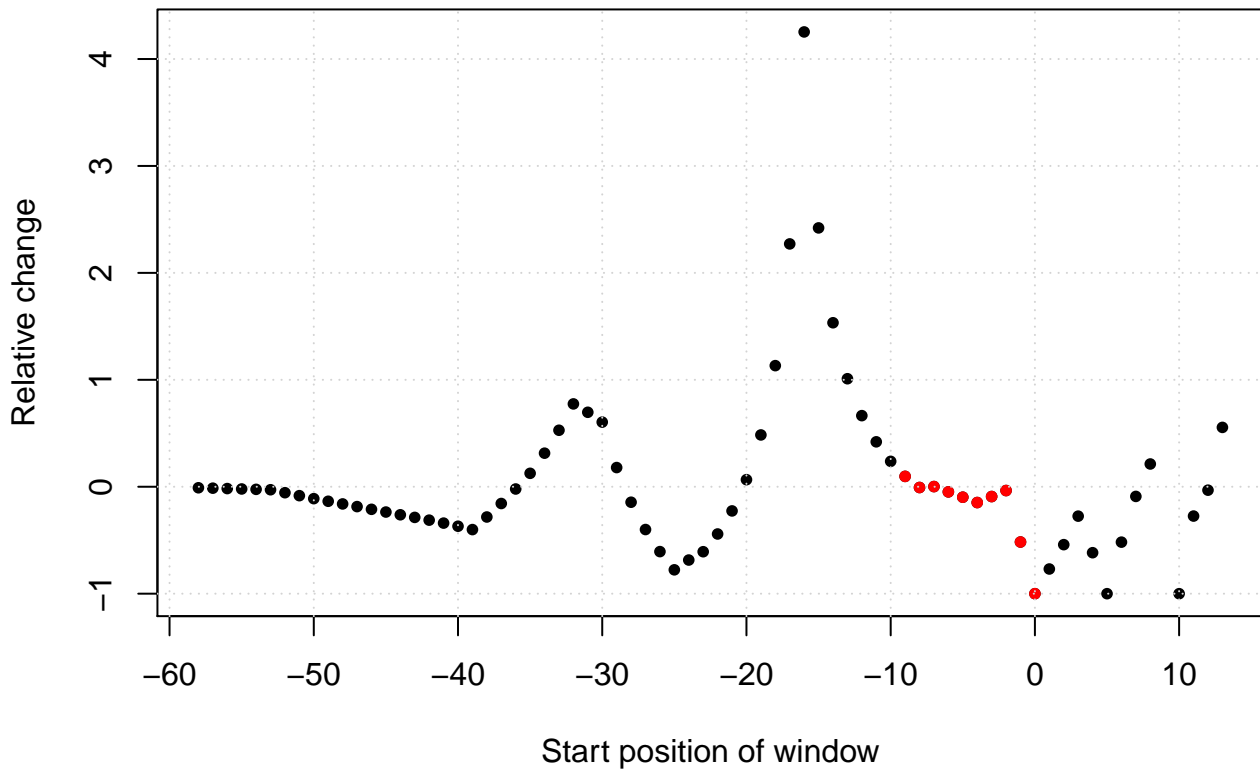

Supplement: supp [file elife-47969-supp-v1.zip]
