# Supplementary material for: Loss of adaptive capacity in asthmatic patients revealed by biomarker fluctuation dynamics after rhinovirus challenge
Source: eLife journal article supplement (doi:10.7554/elife.47969), 2019-11-05

# P01A

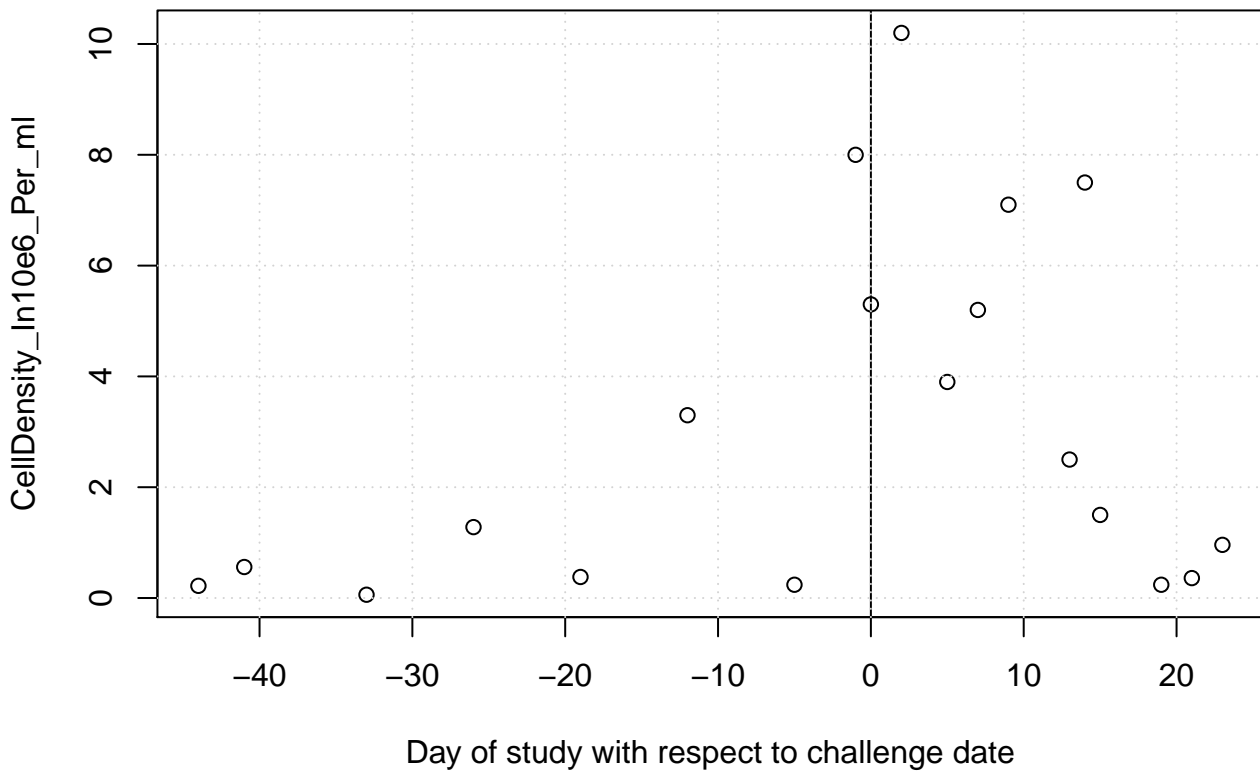

## P02A

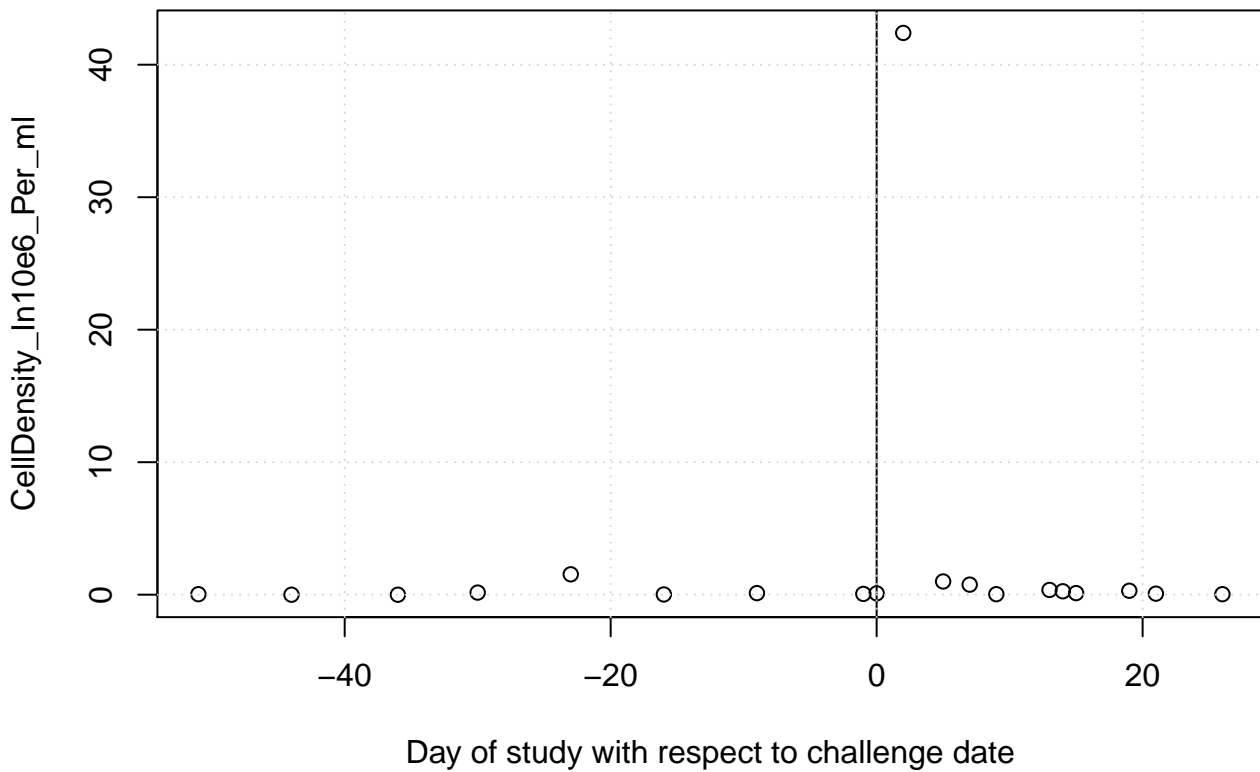

# P04A

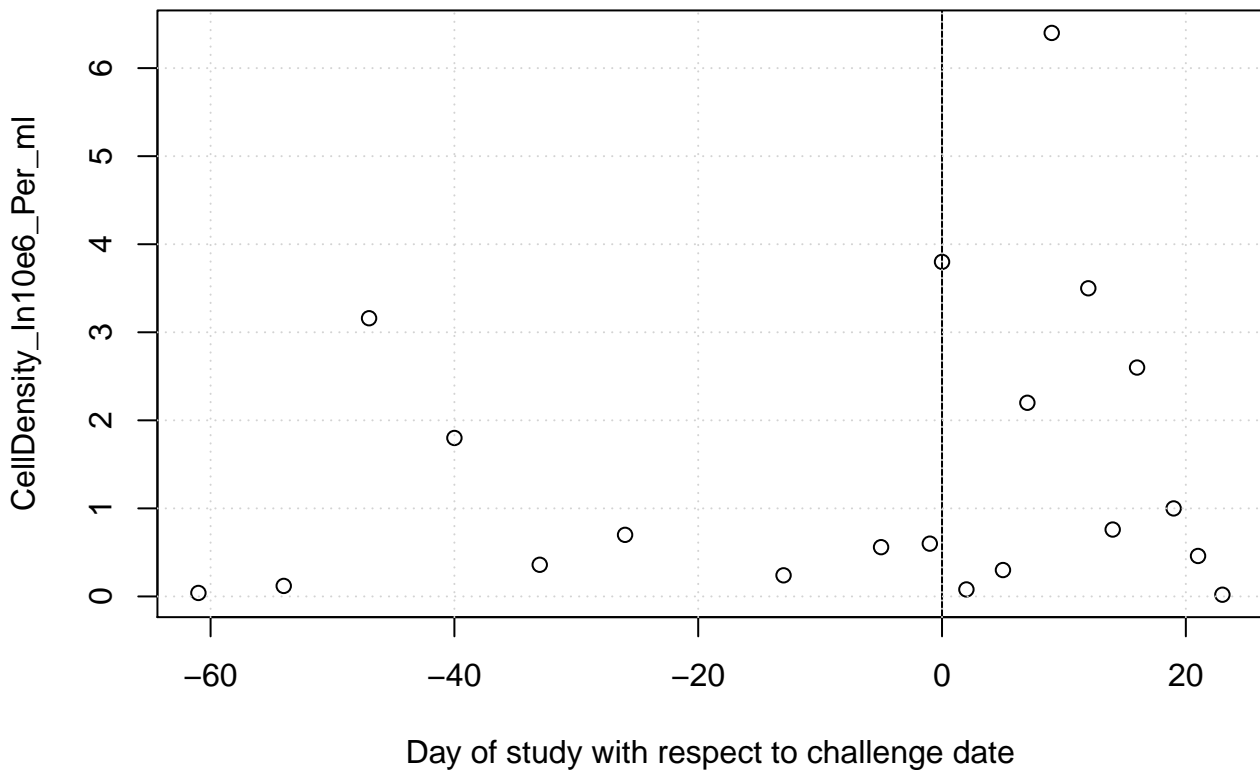

# P05A

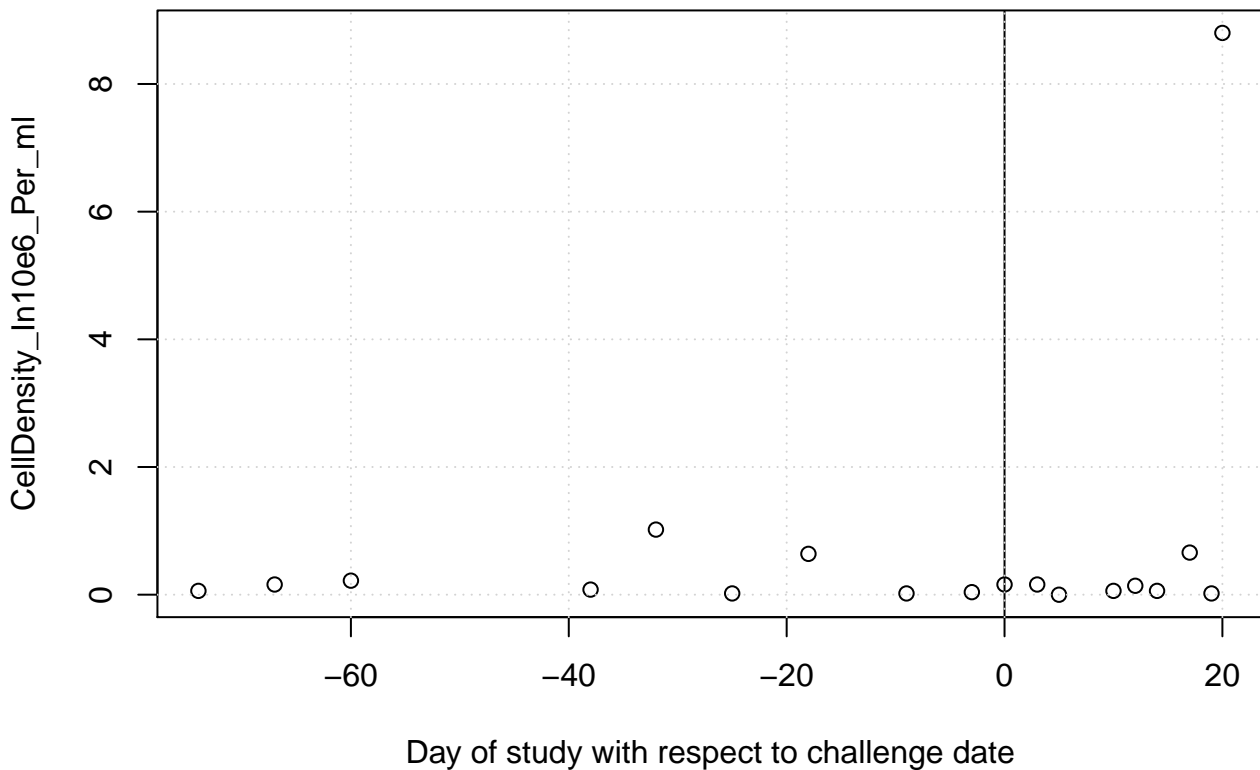

# P06A

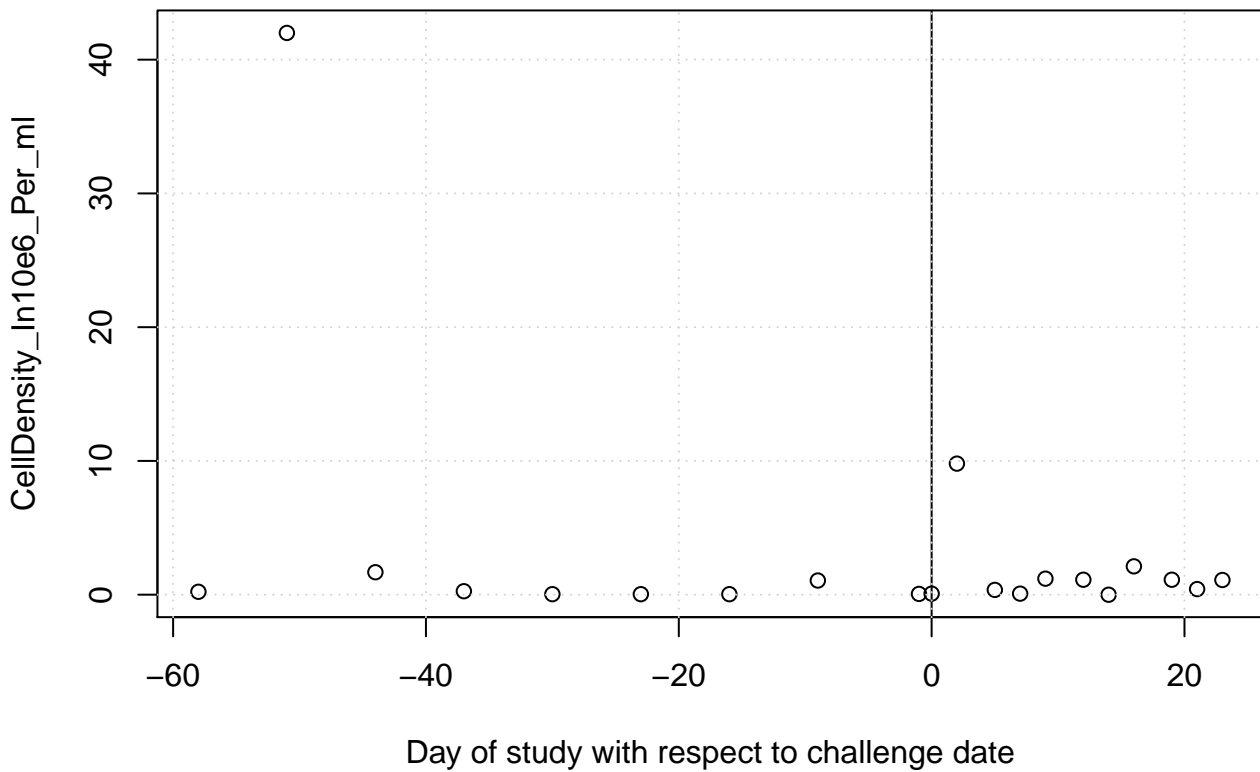

**P07A**

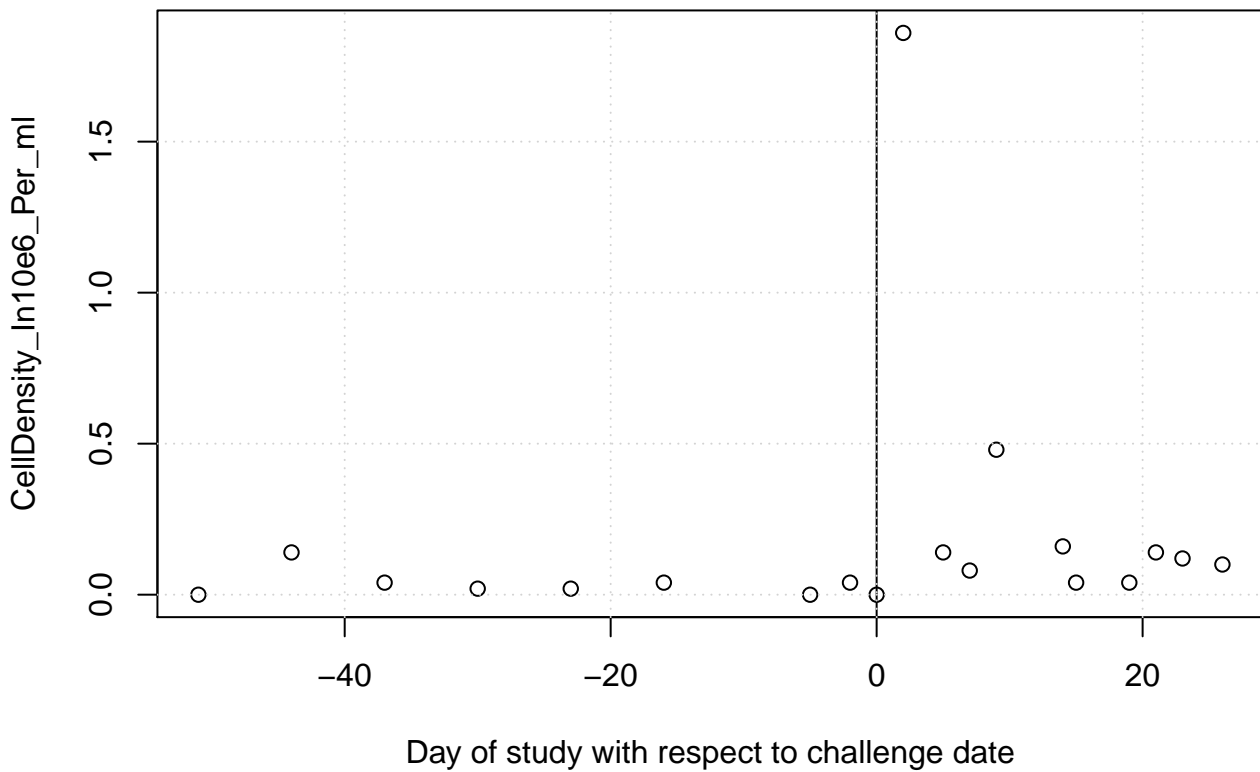

# P08A

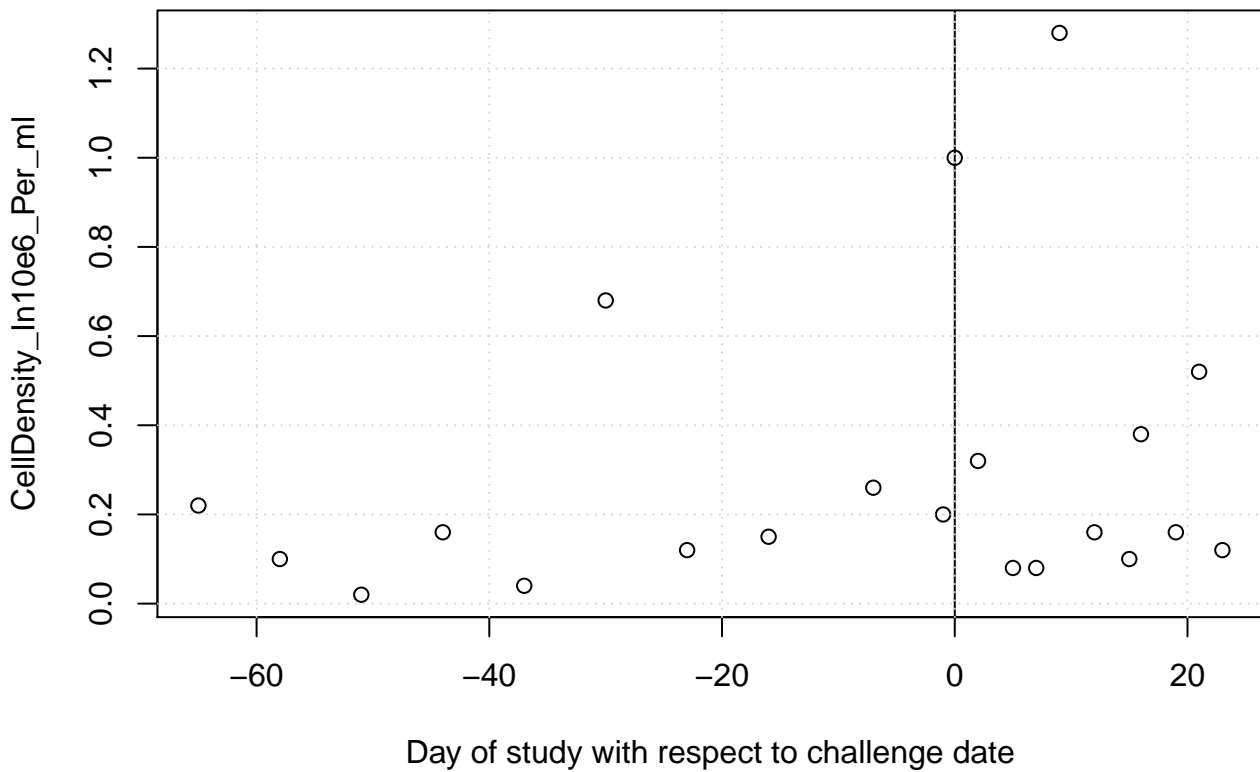

**P09A**

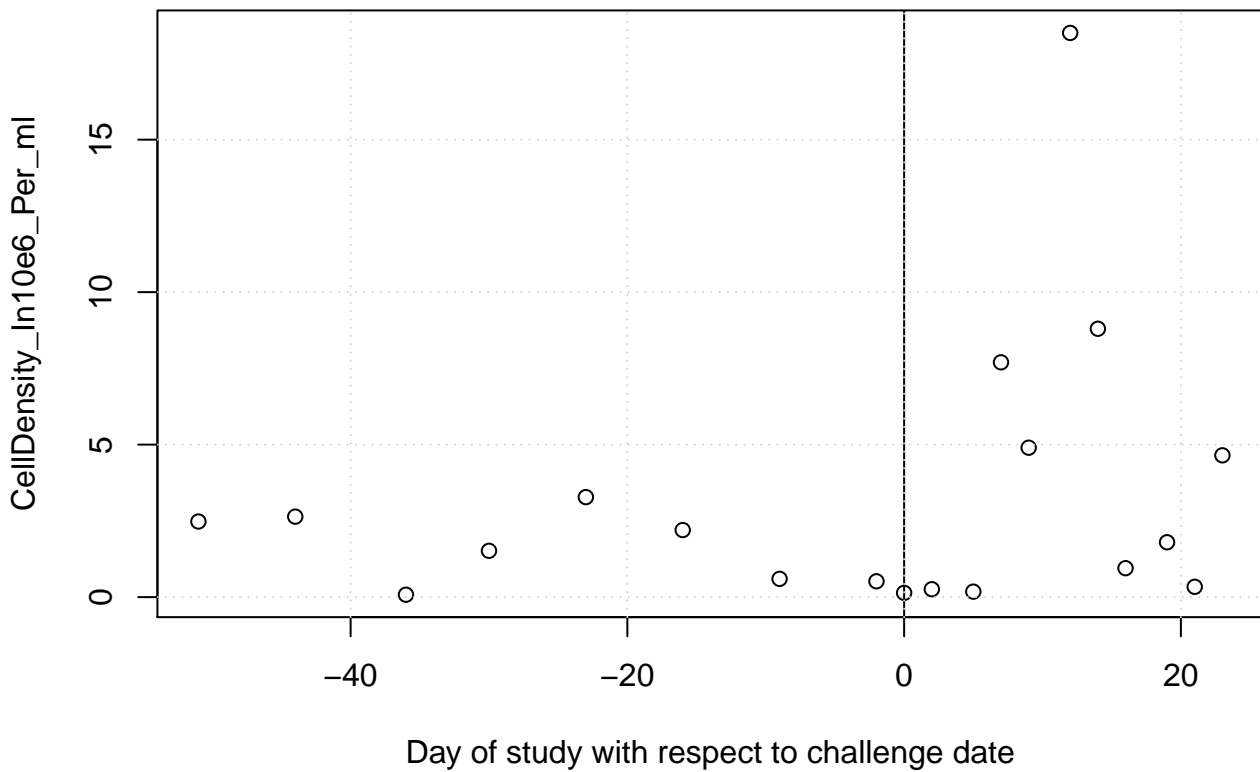



# P10A

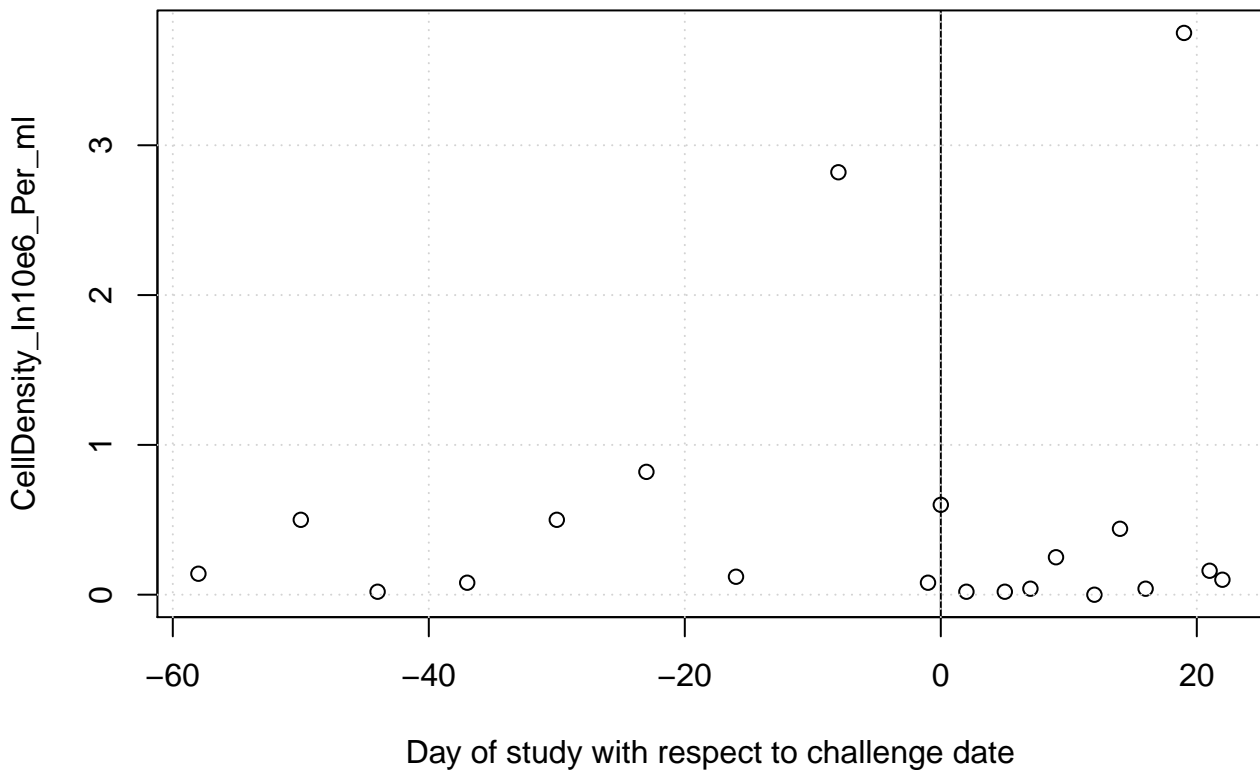

# P11A

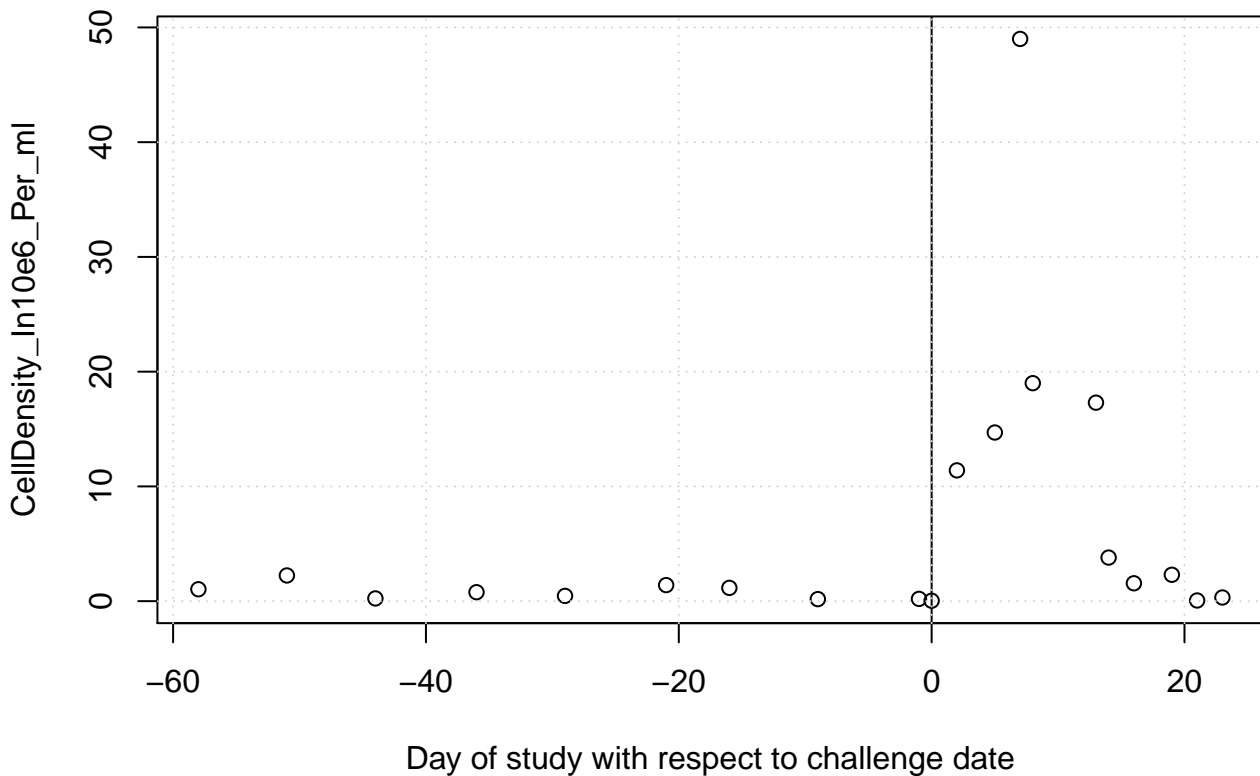

## P12A

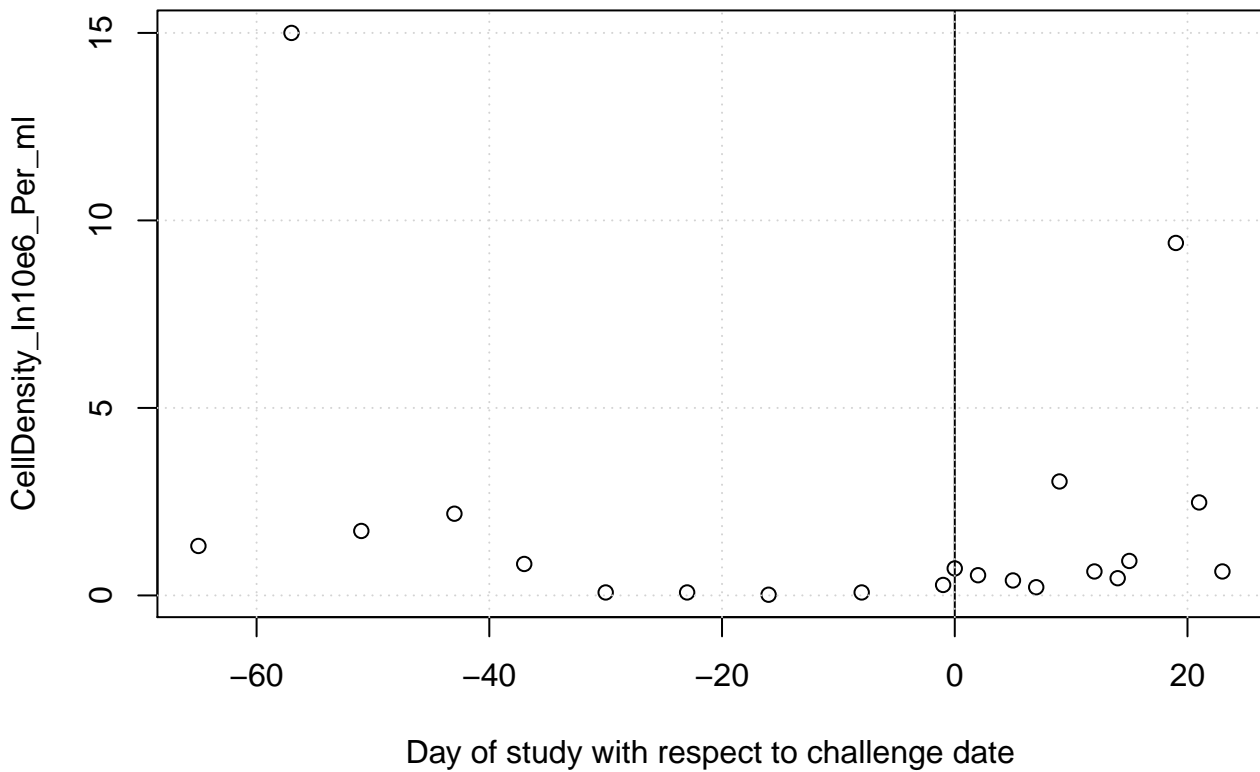

# P13A

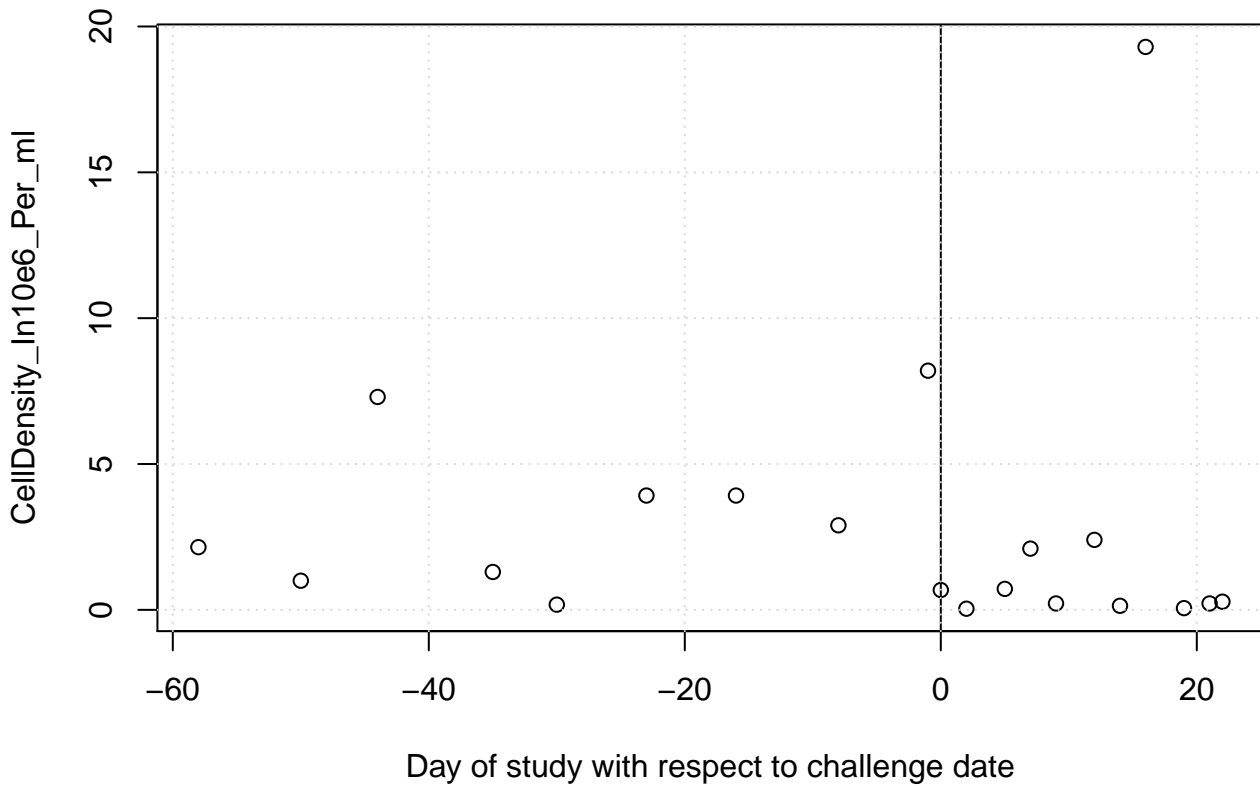

# P01H

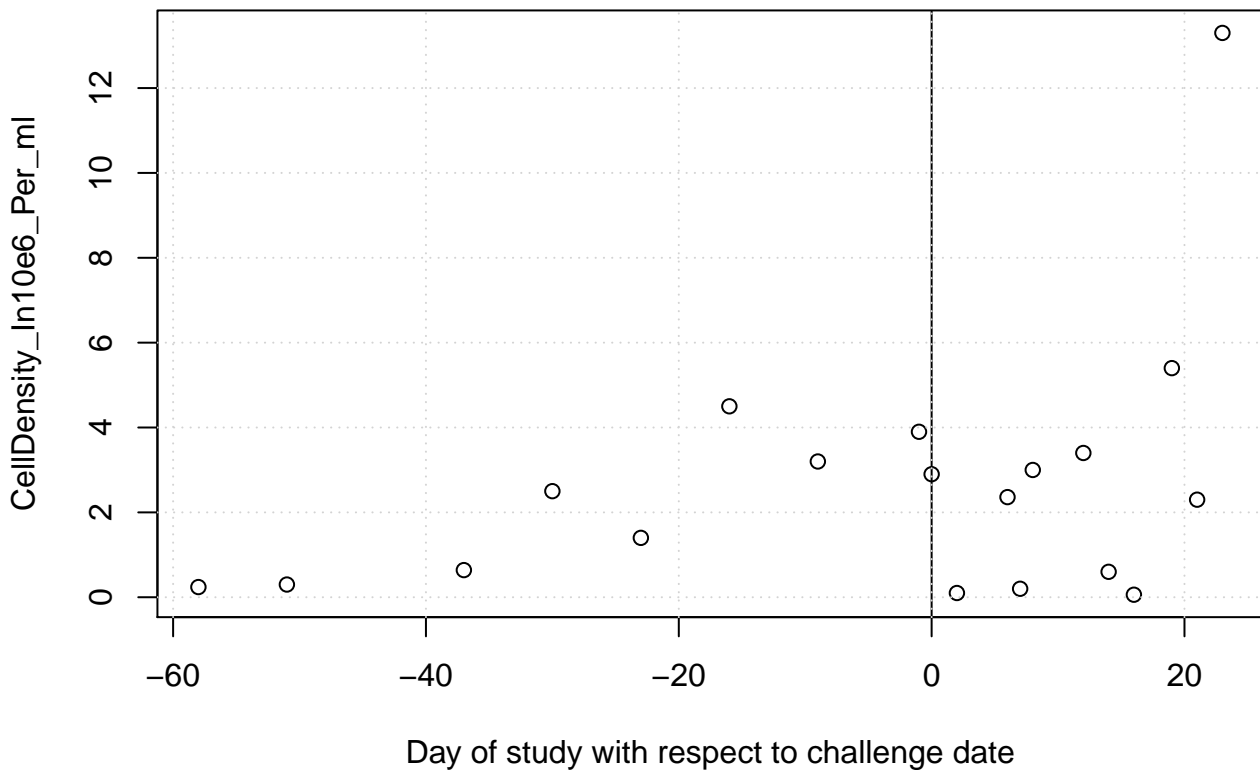

# P03H

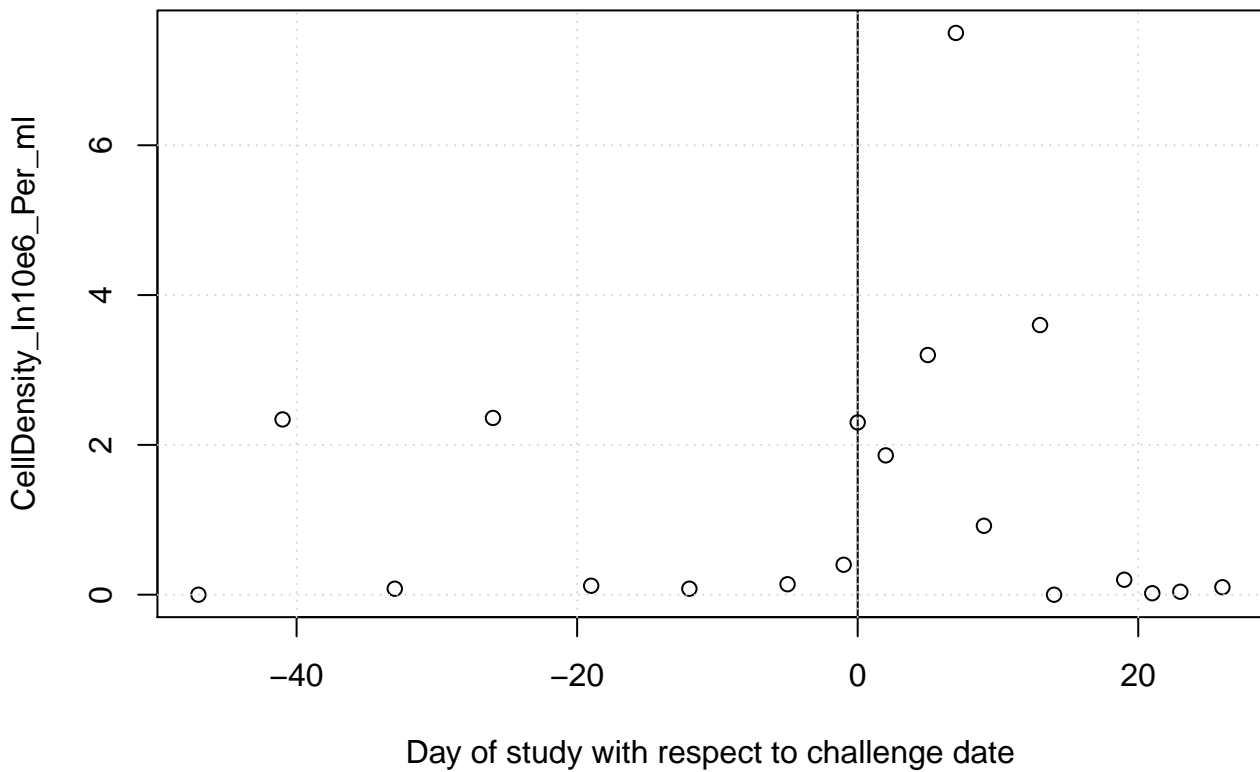

# P05H

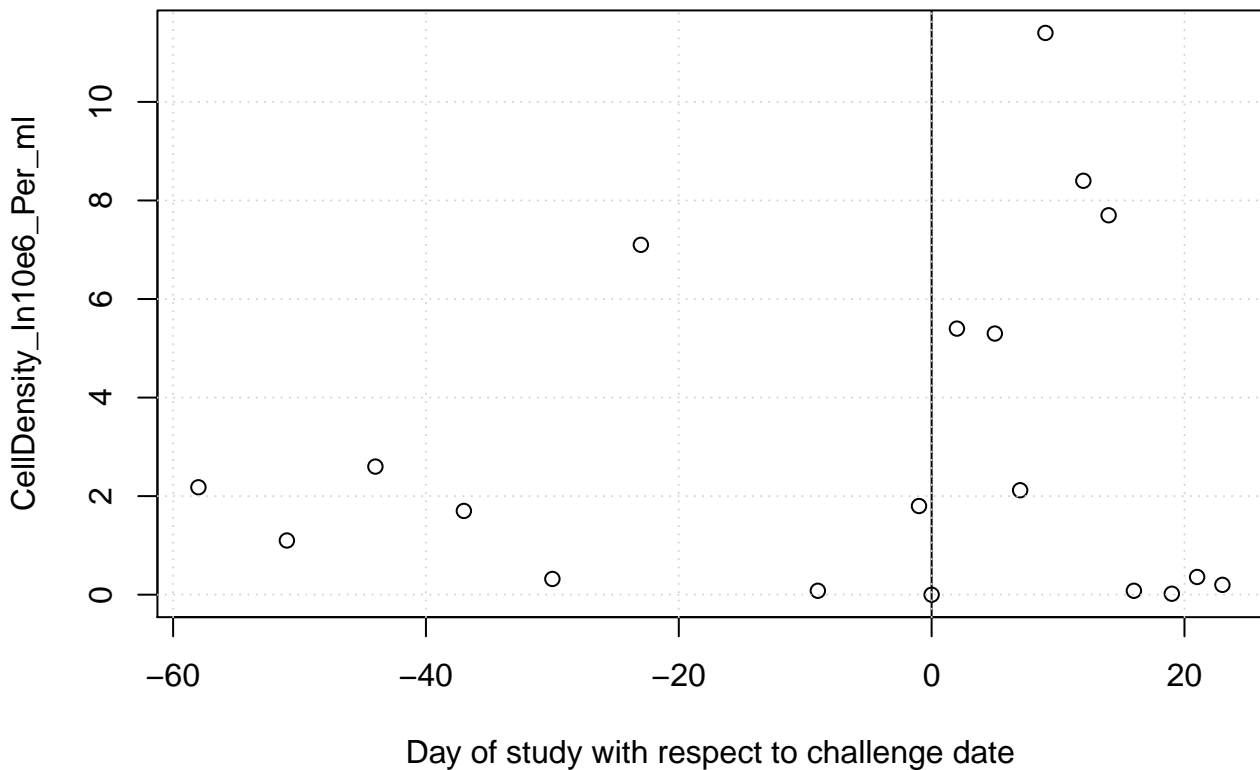

# P06H

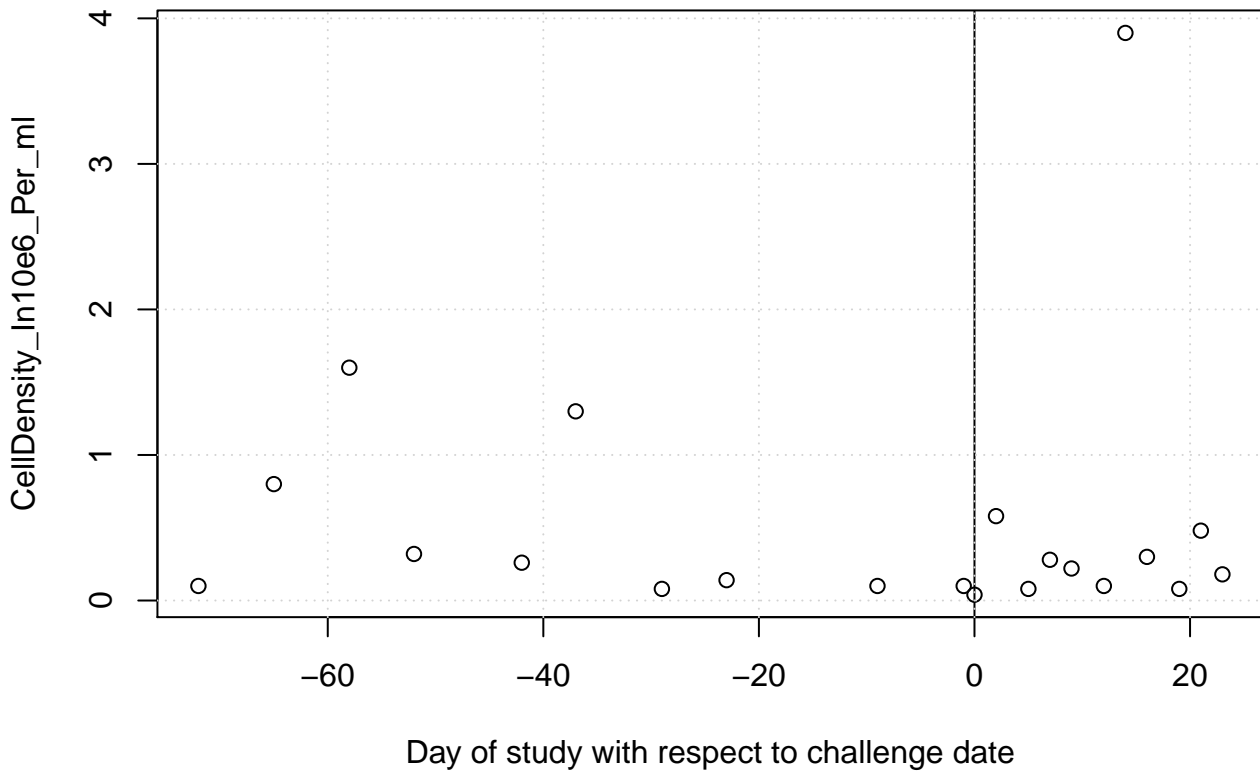



# P07H

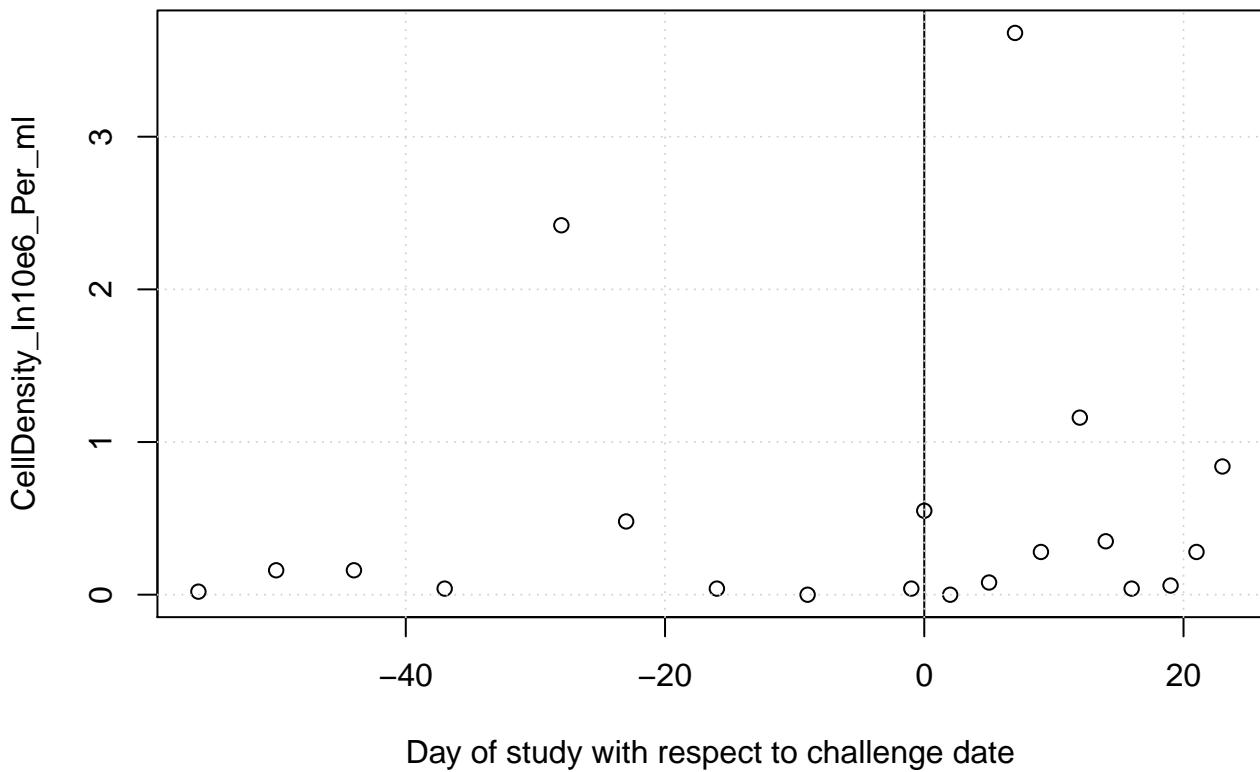

# P08H

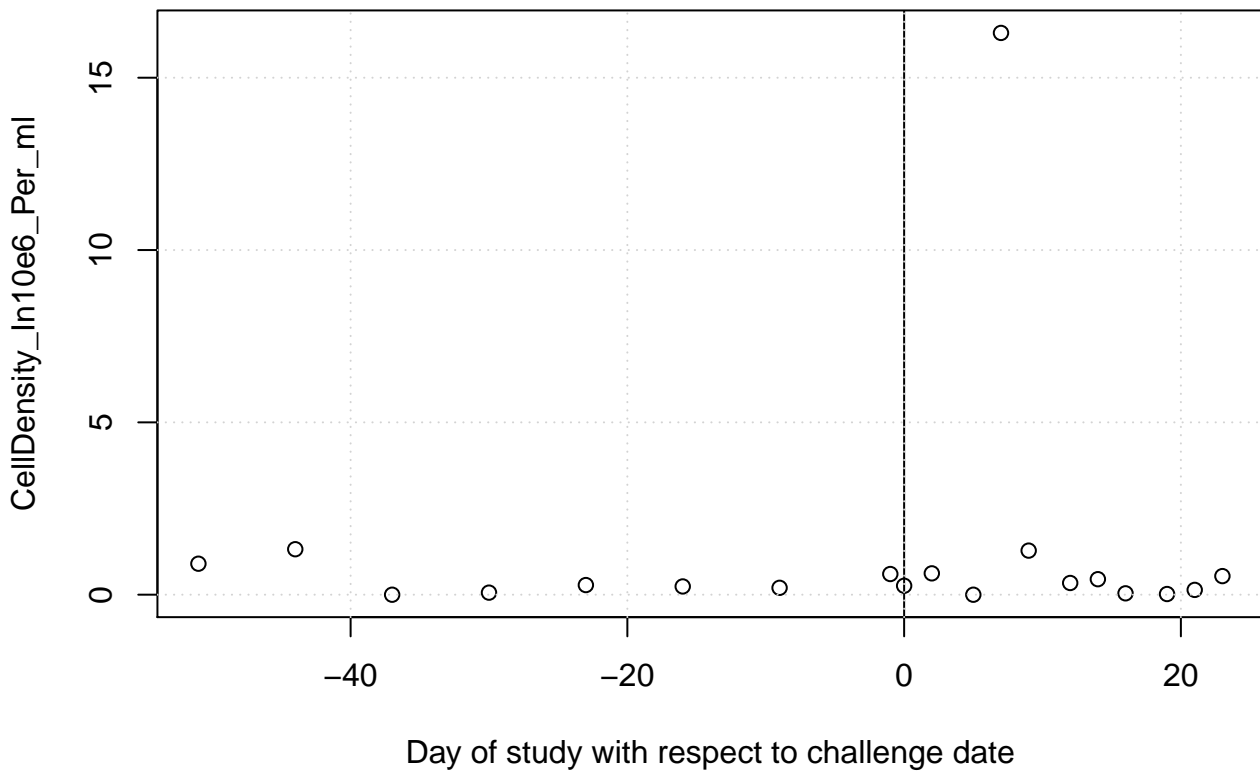

# P09H

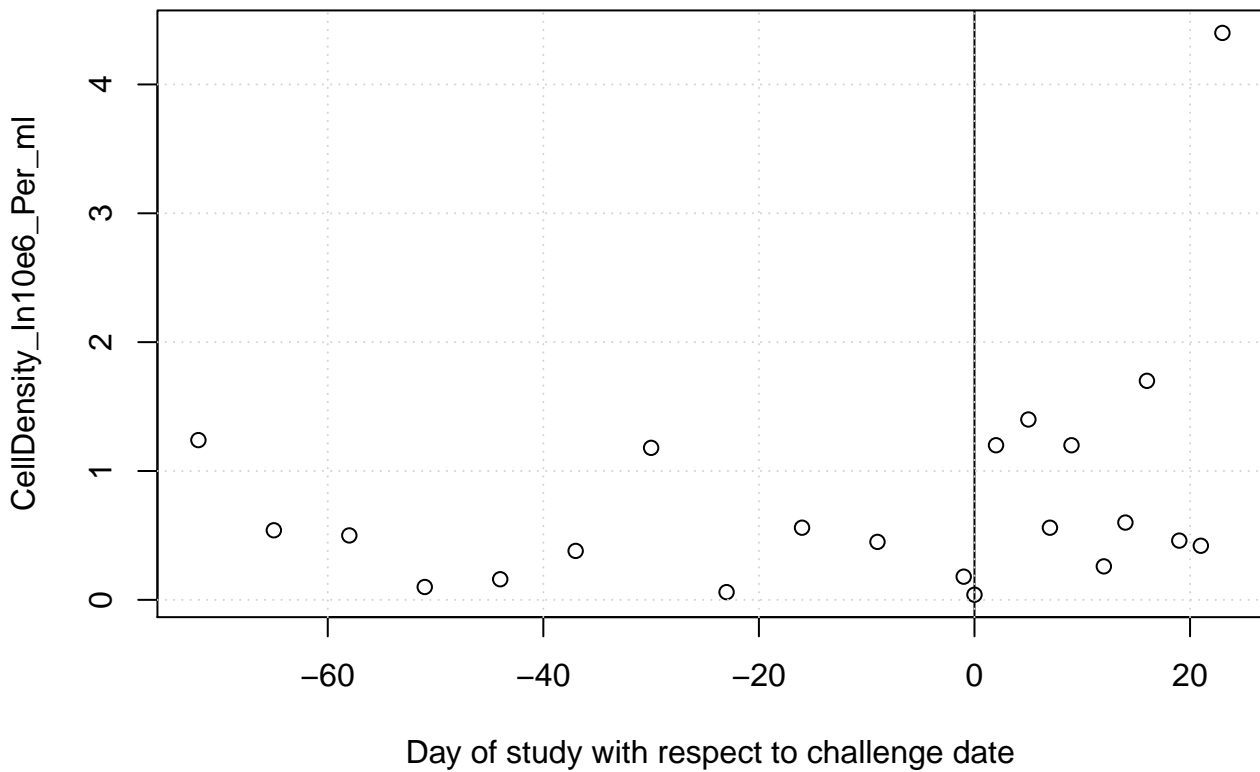

# P11H

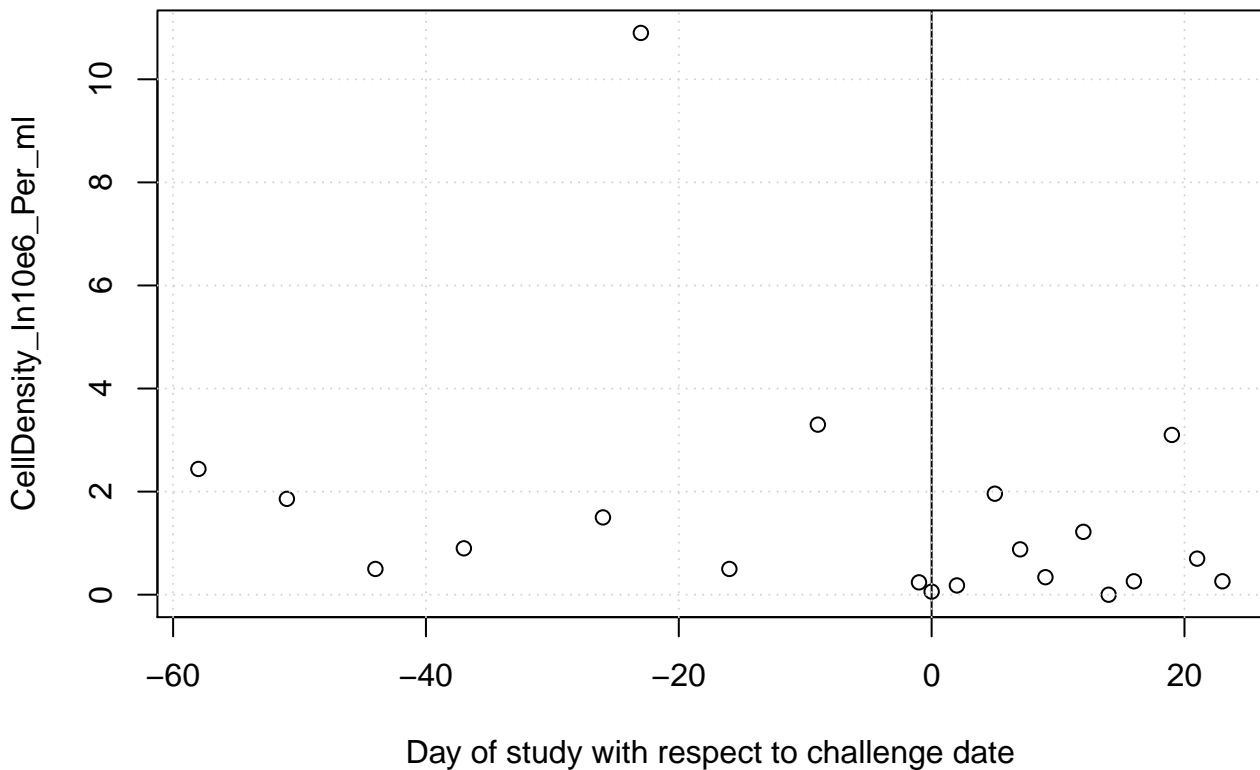

## P12H

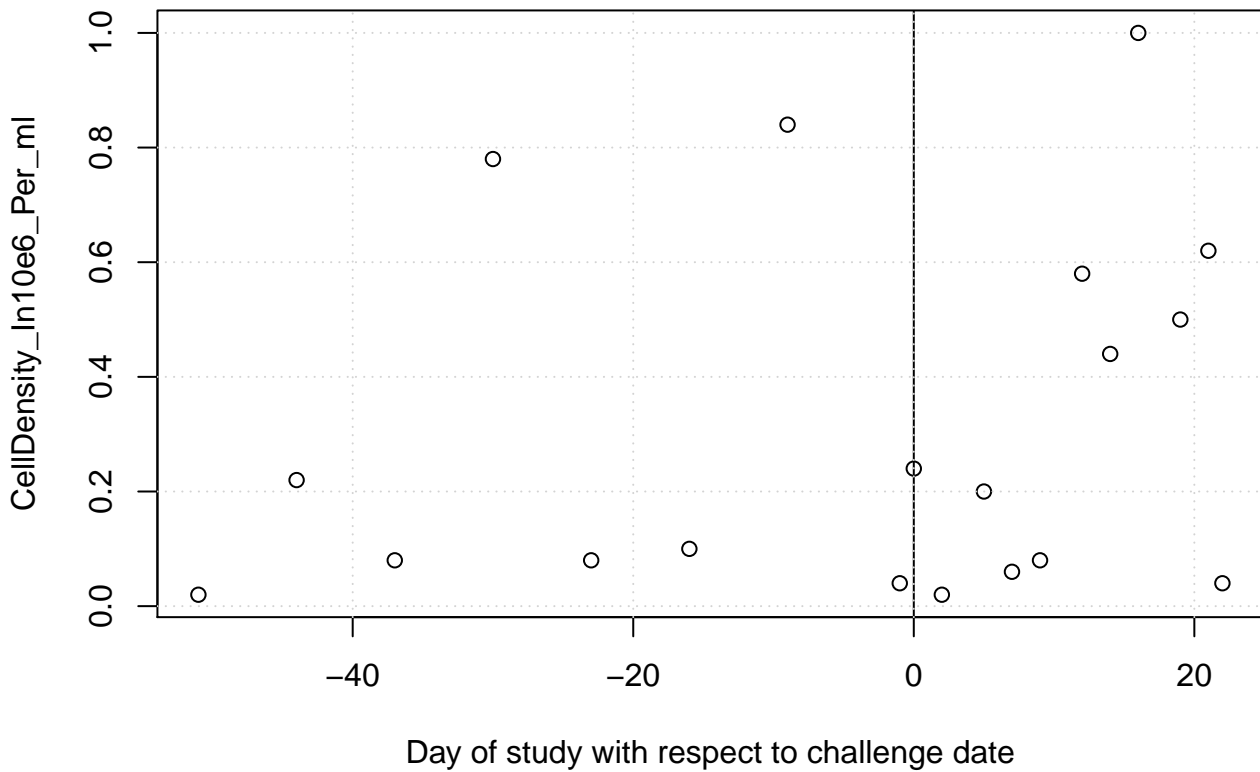

# P13H

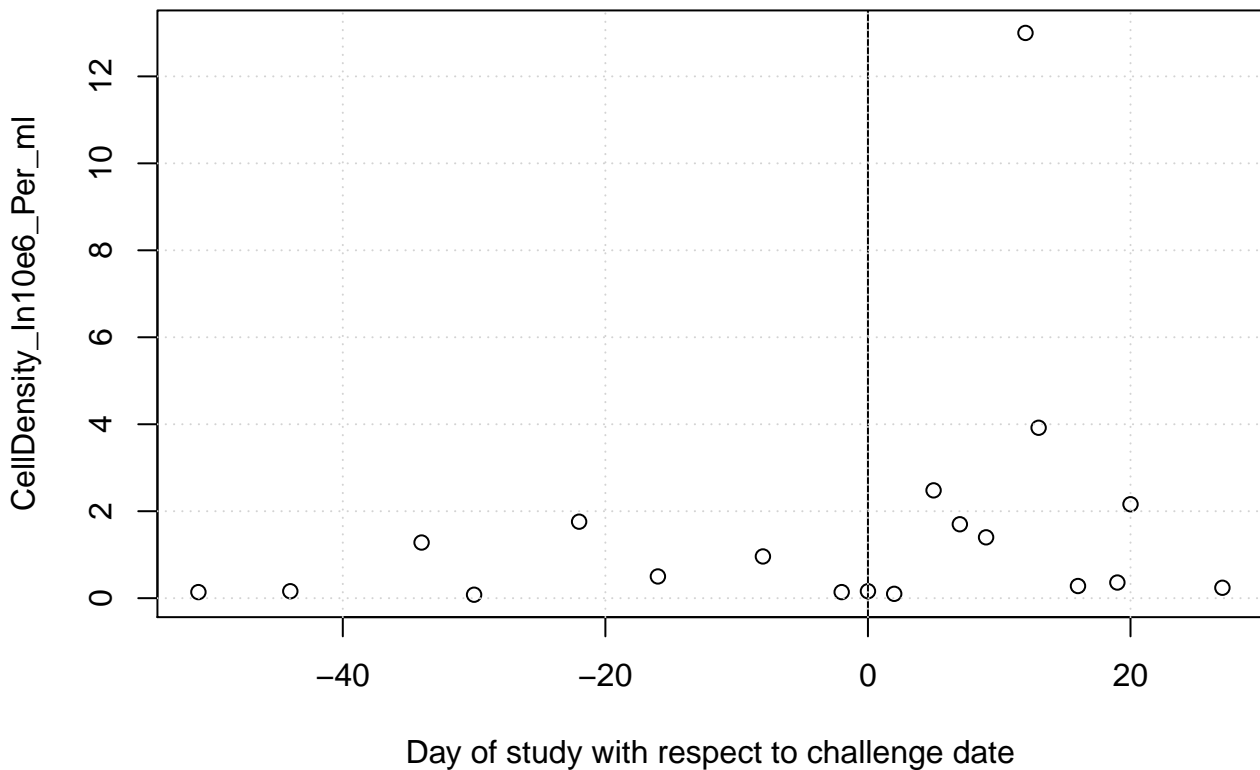

# P14H

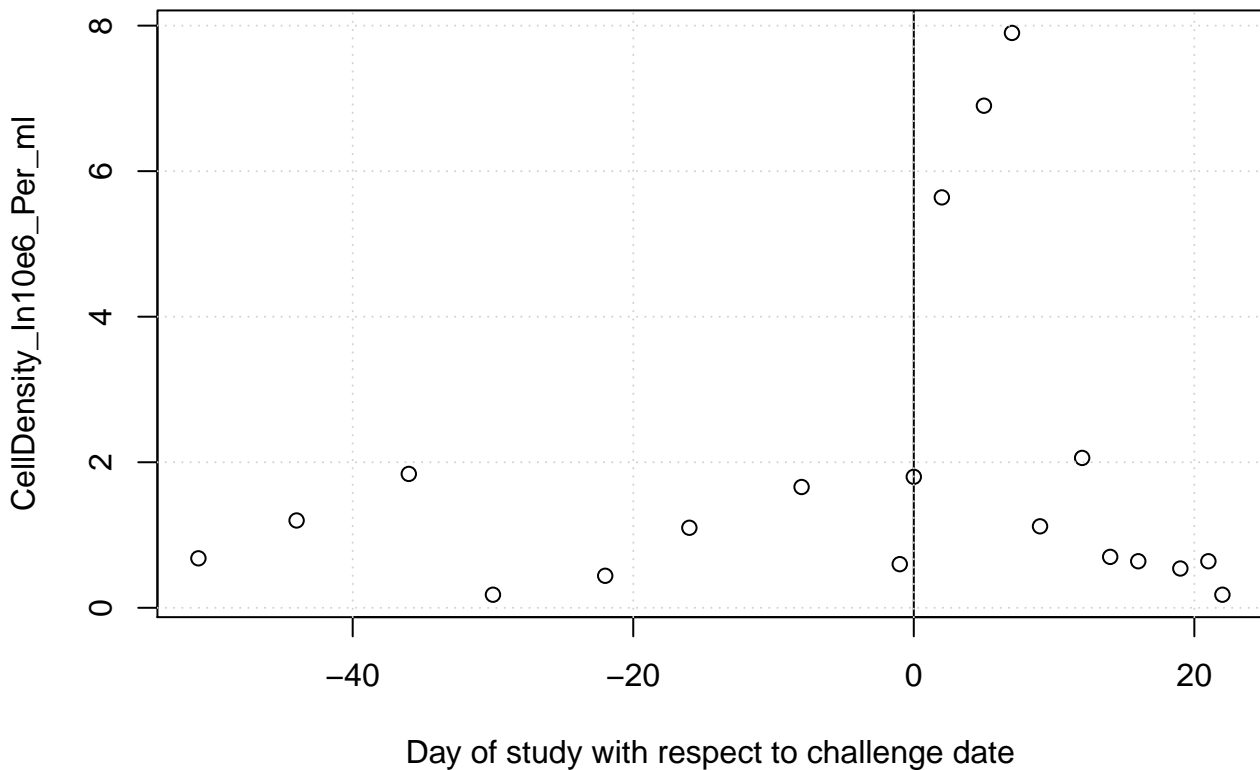

# P15H

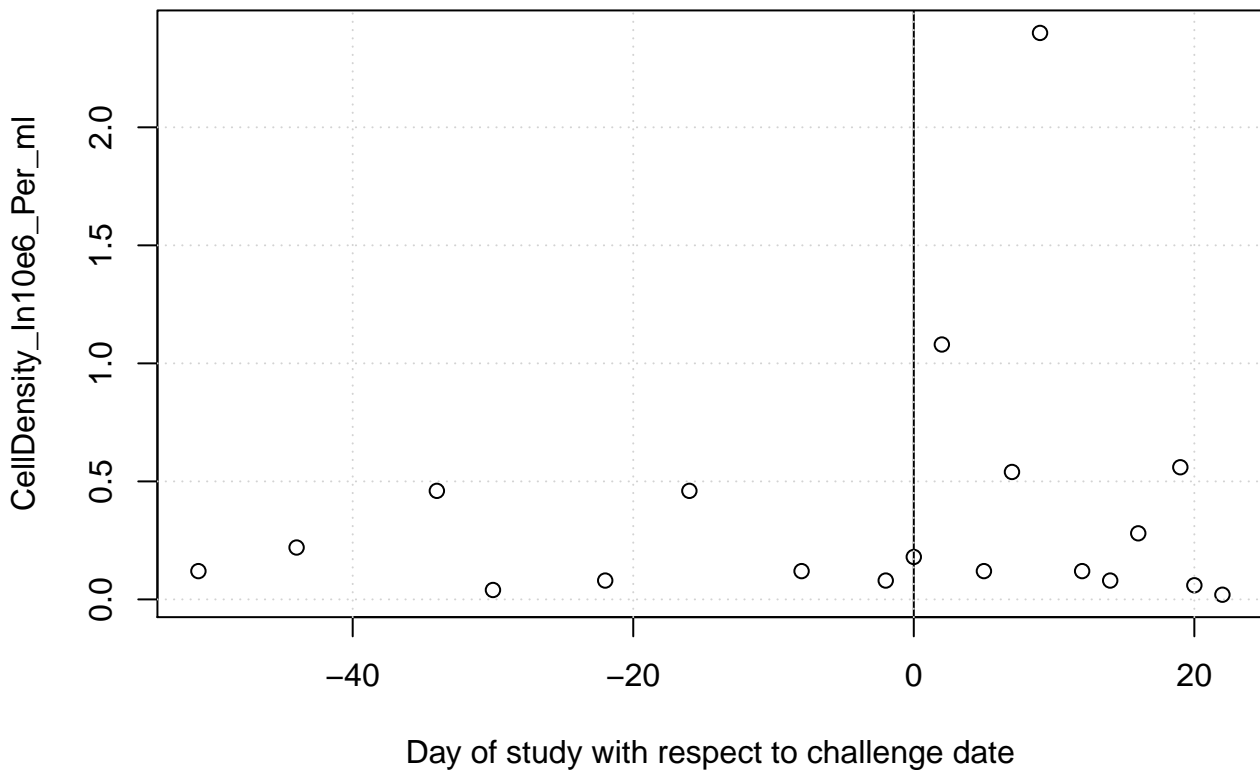



# P01A

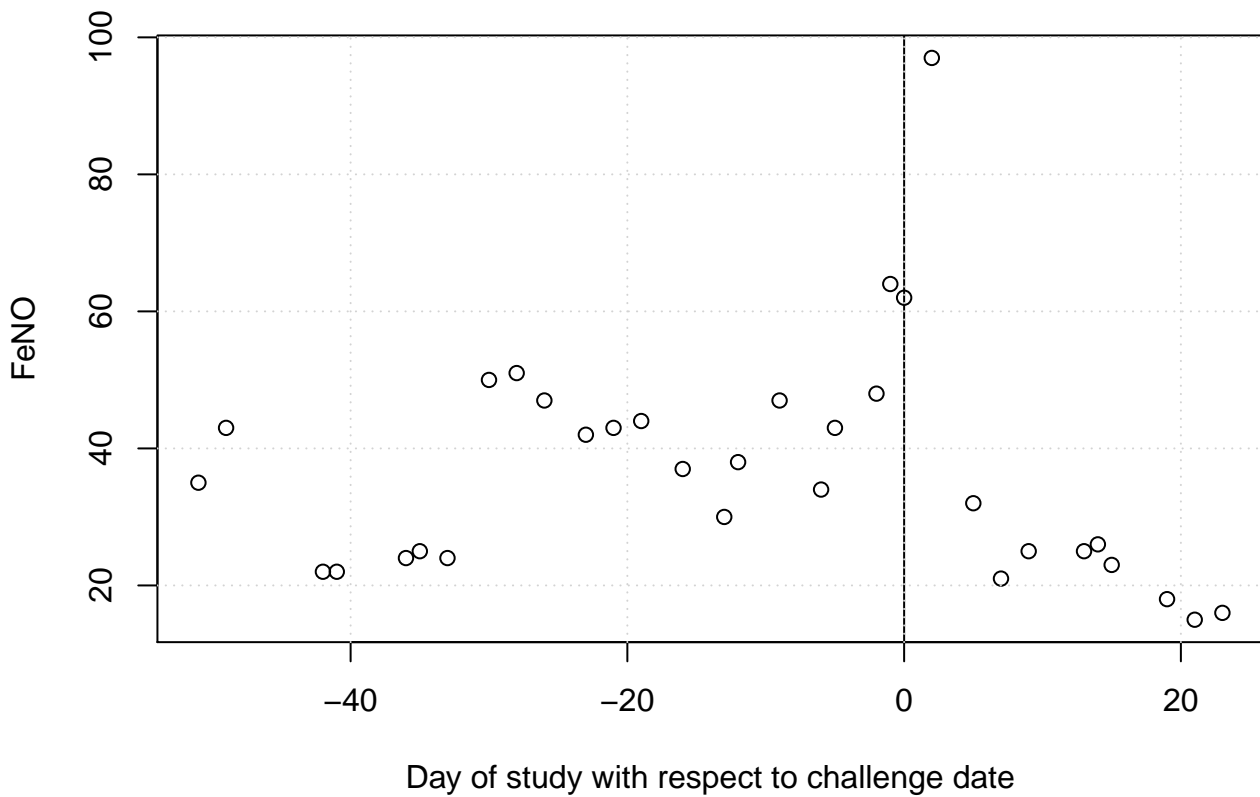

# P02A

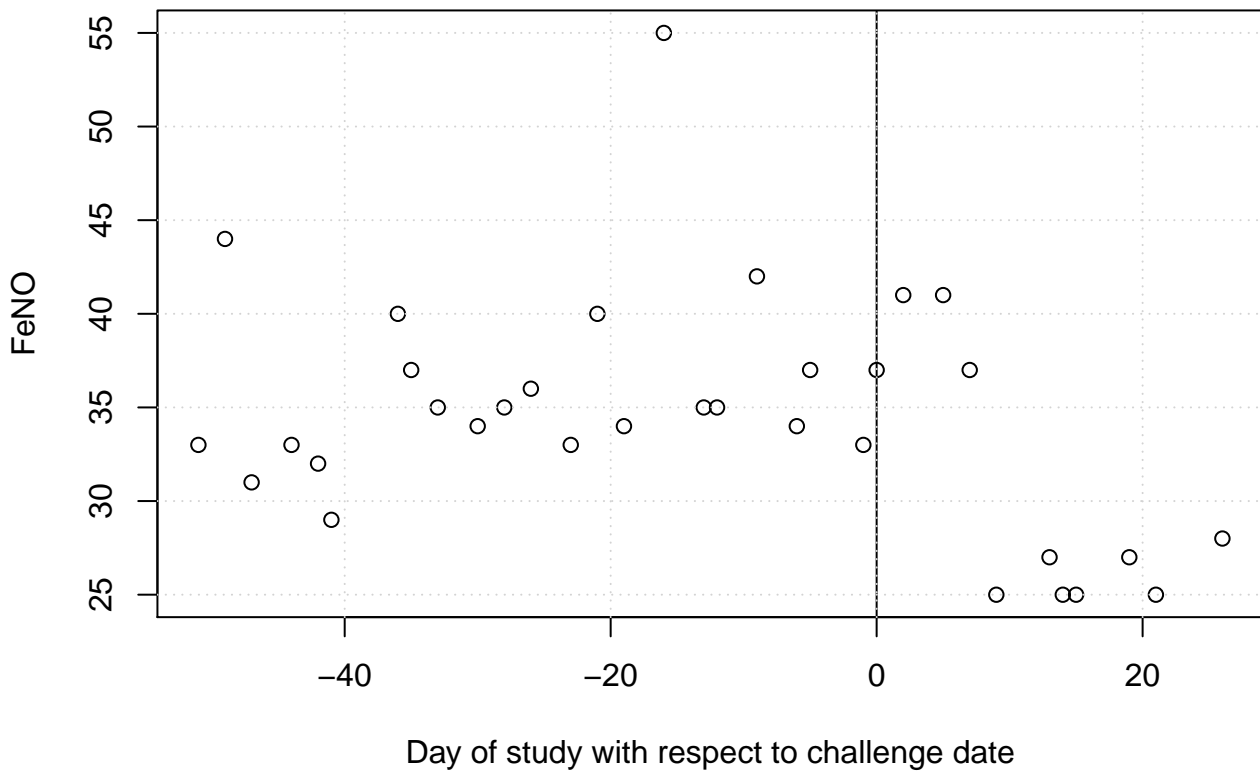

# P04A

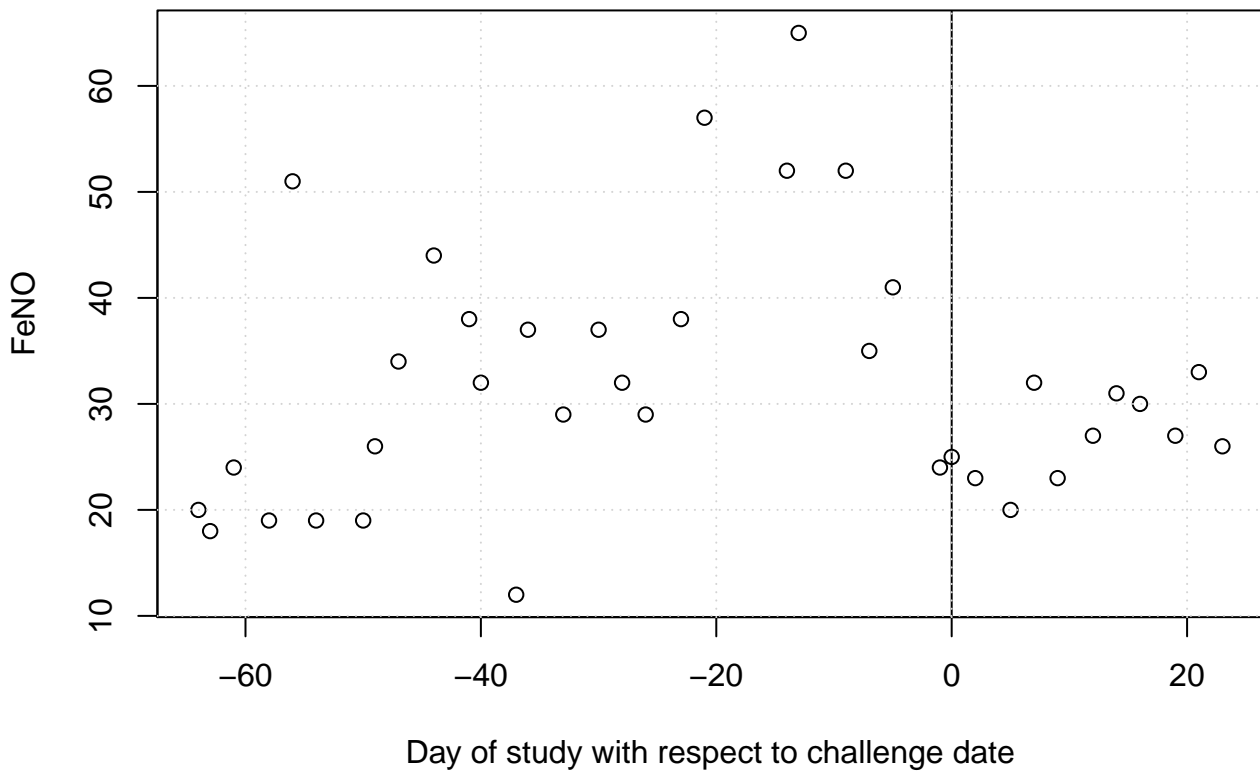

# P05A

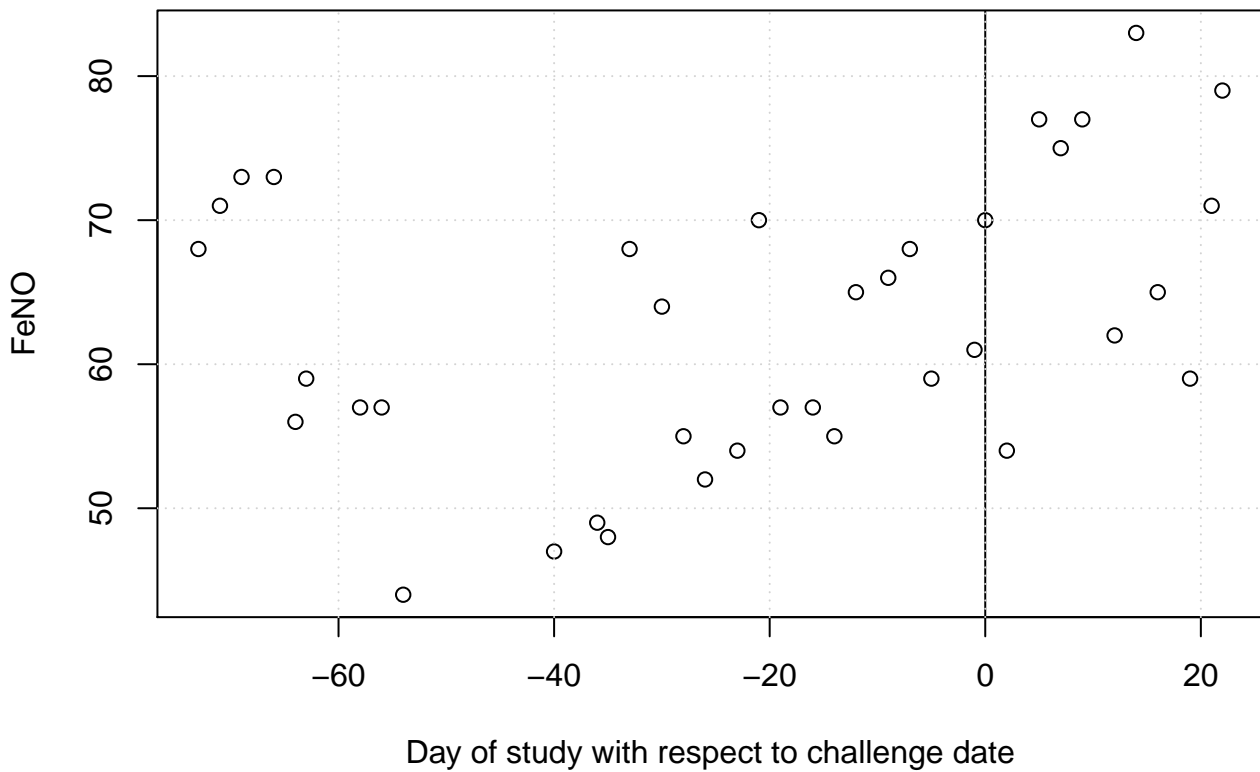

# P06A

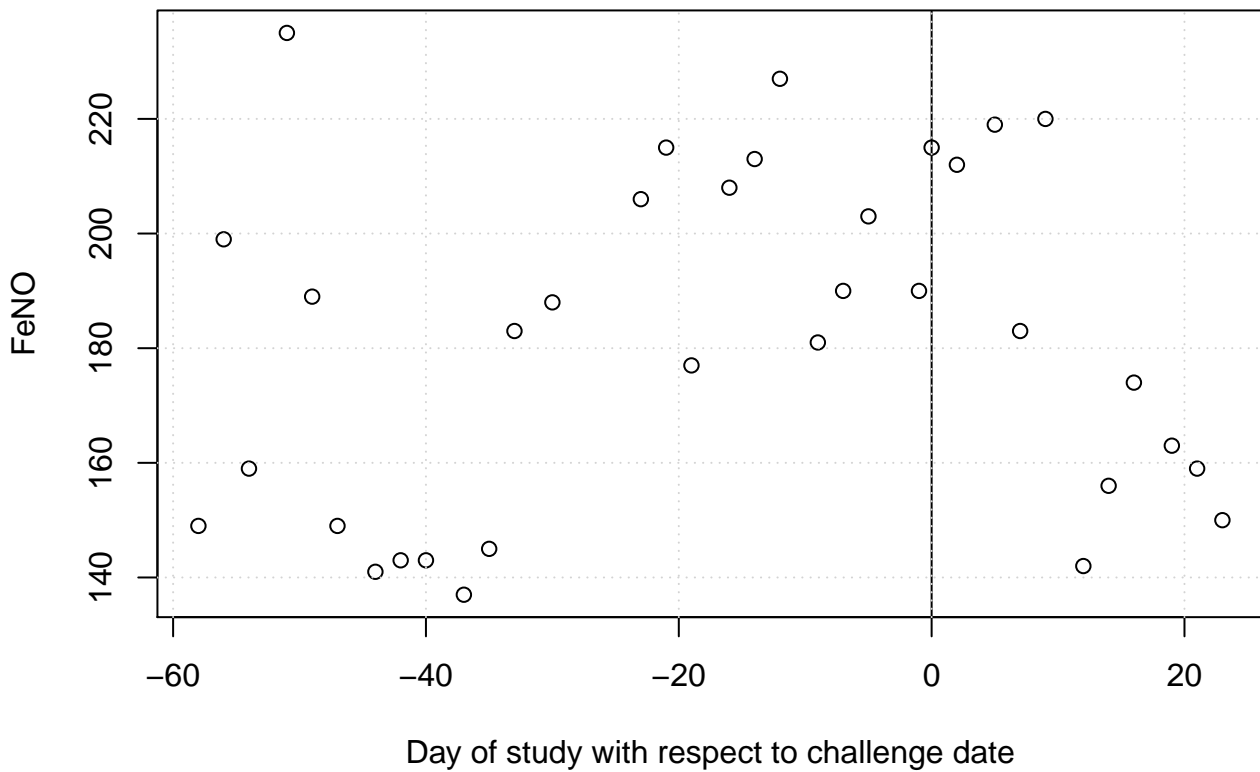

**P07A**

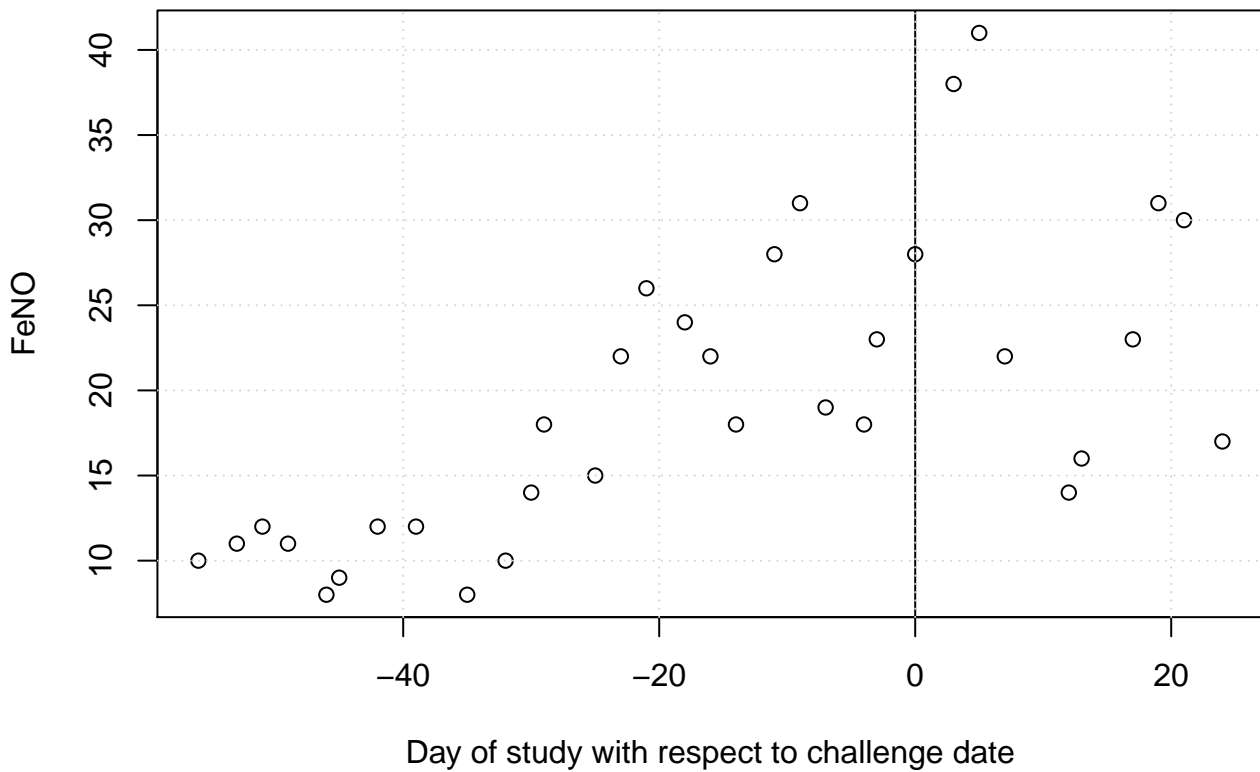

# P08A

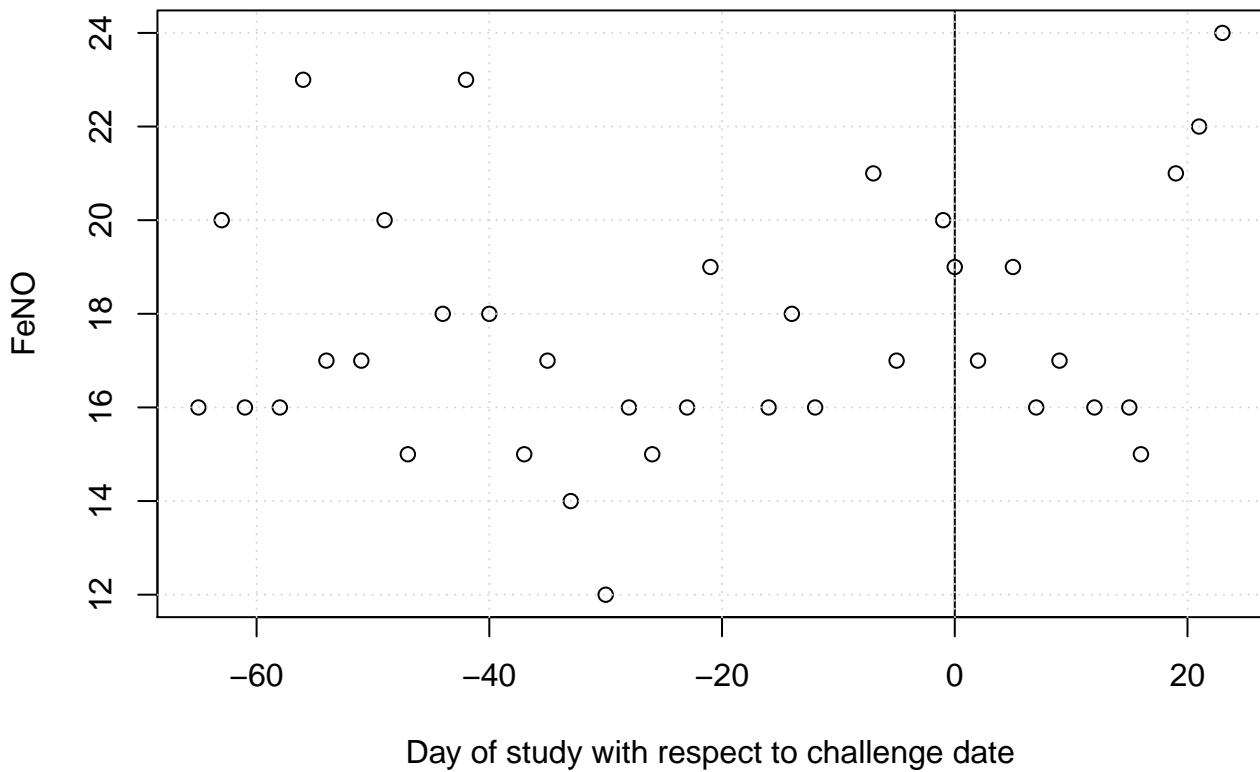

# P09A

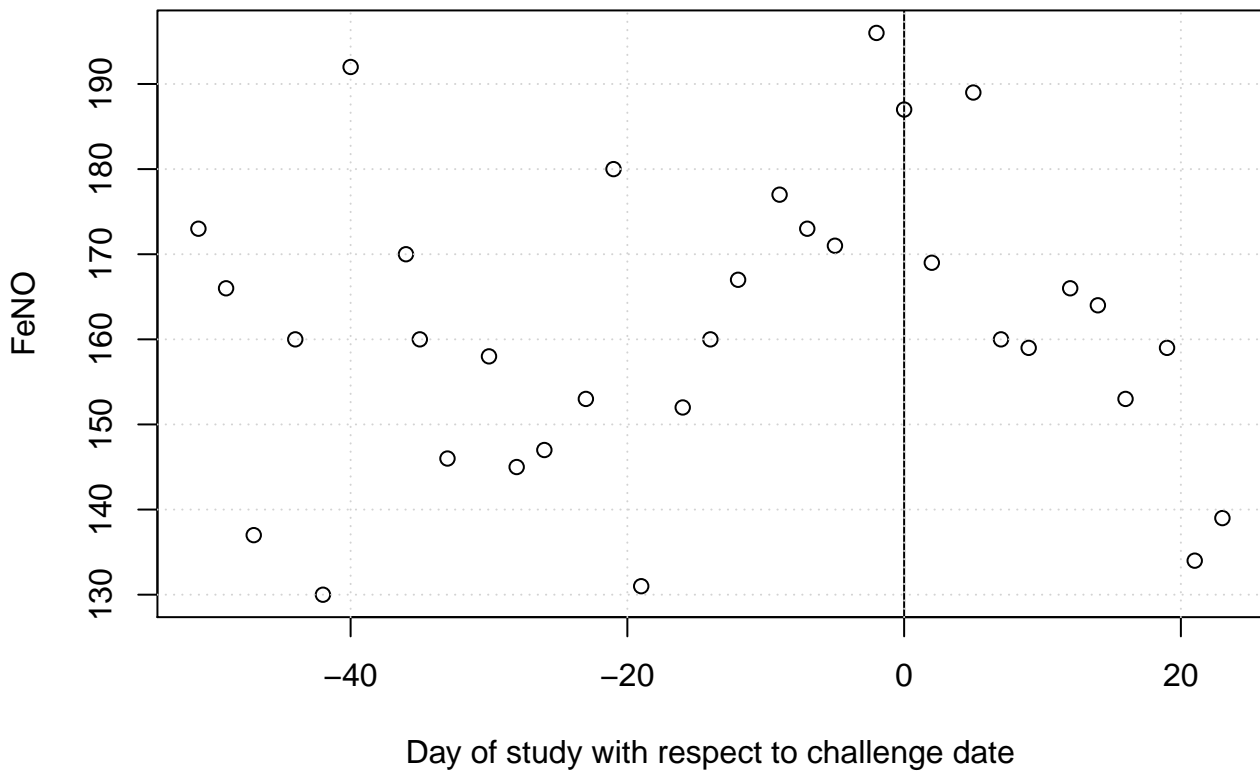



# P10A

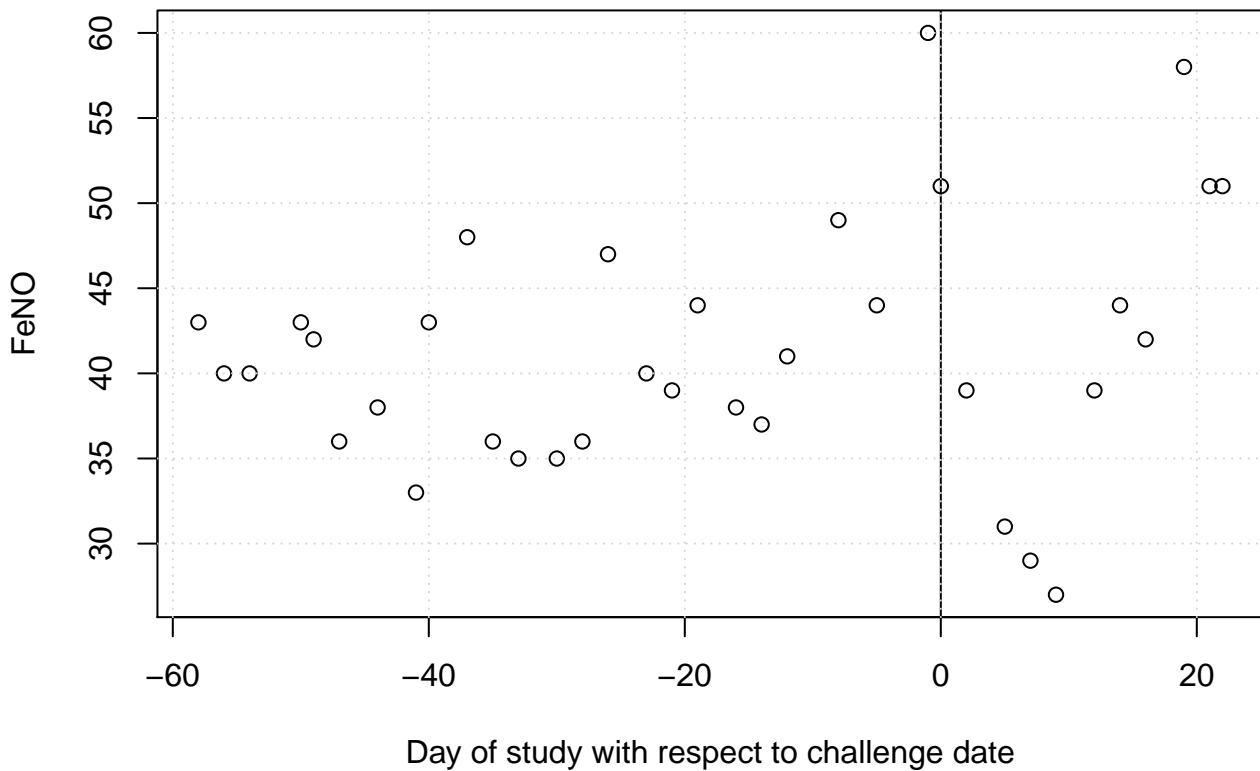

# P11A

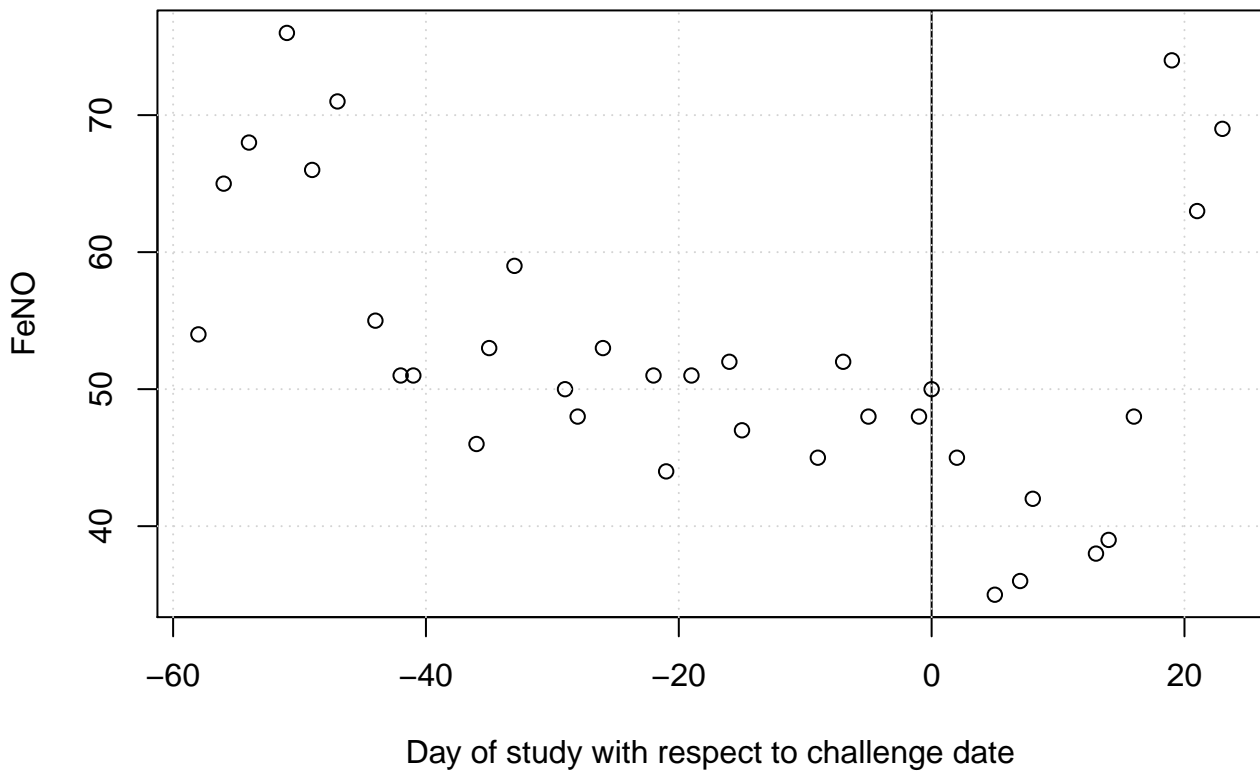

# P12A

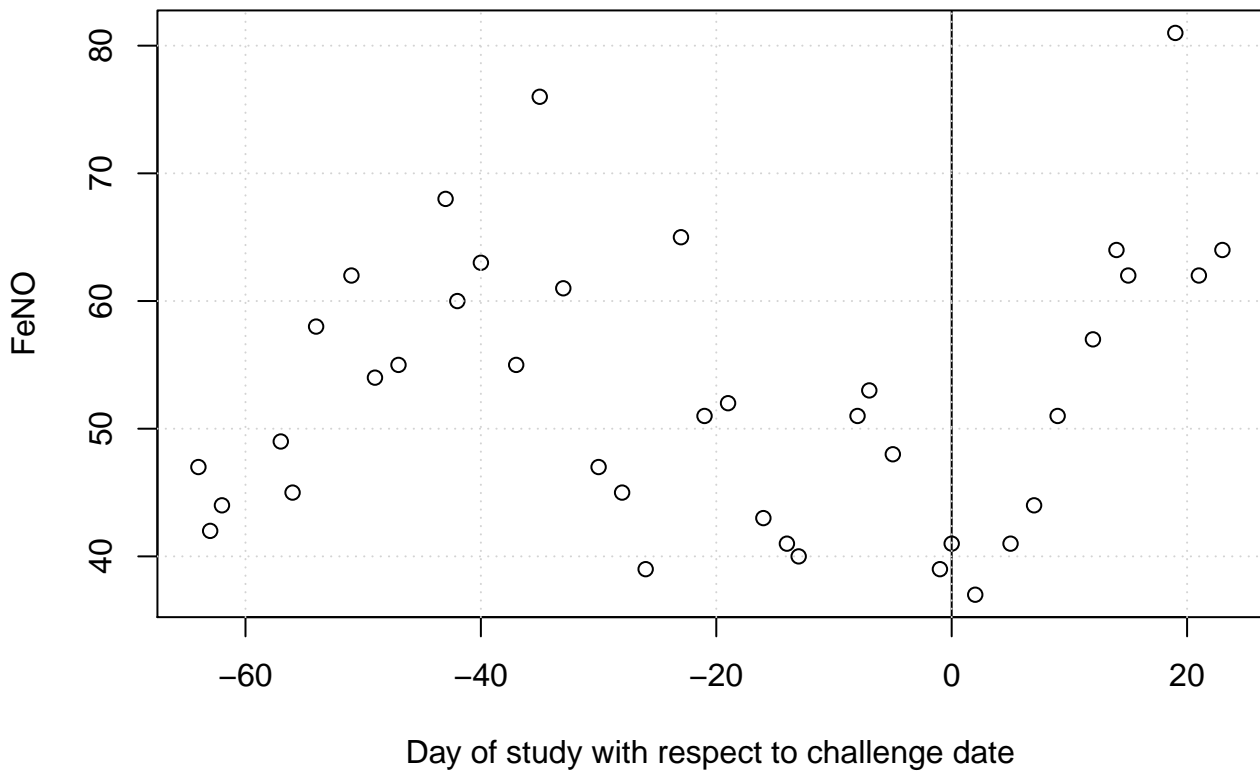

# P13A

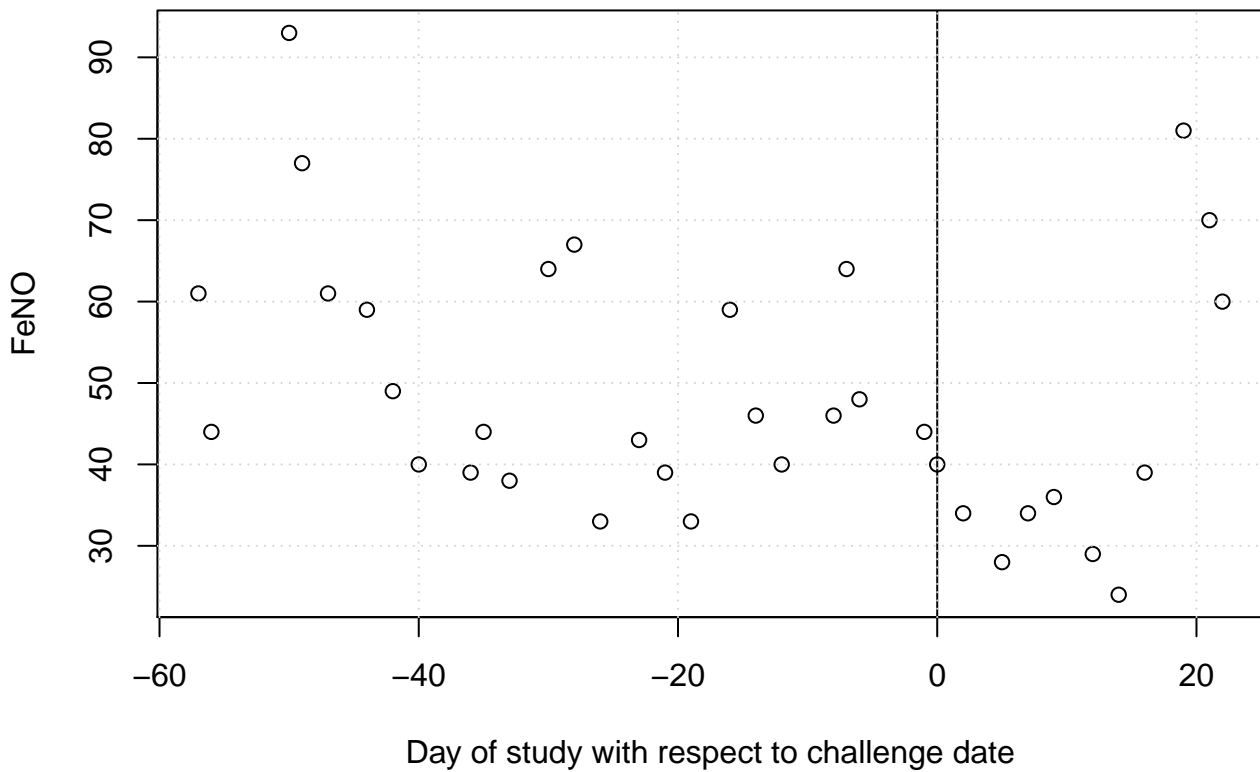

# P01H

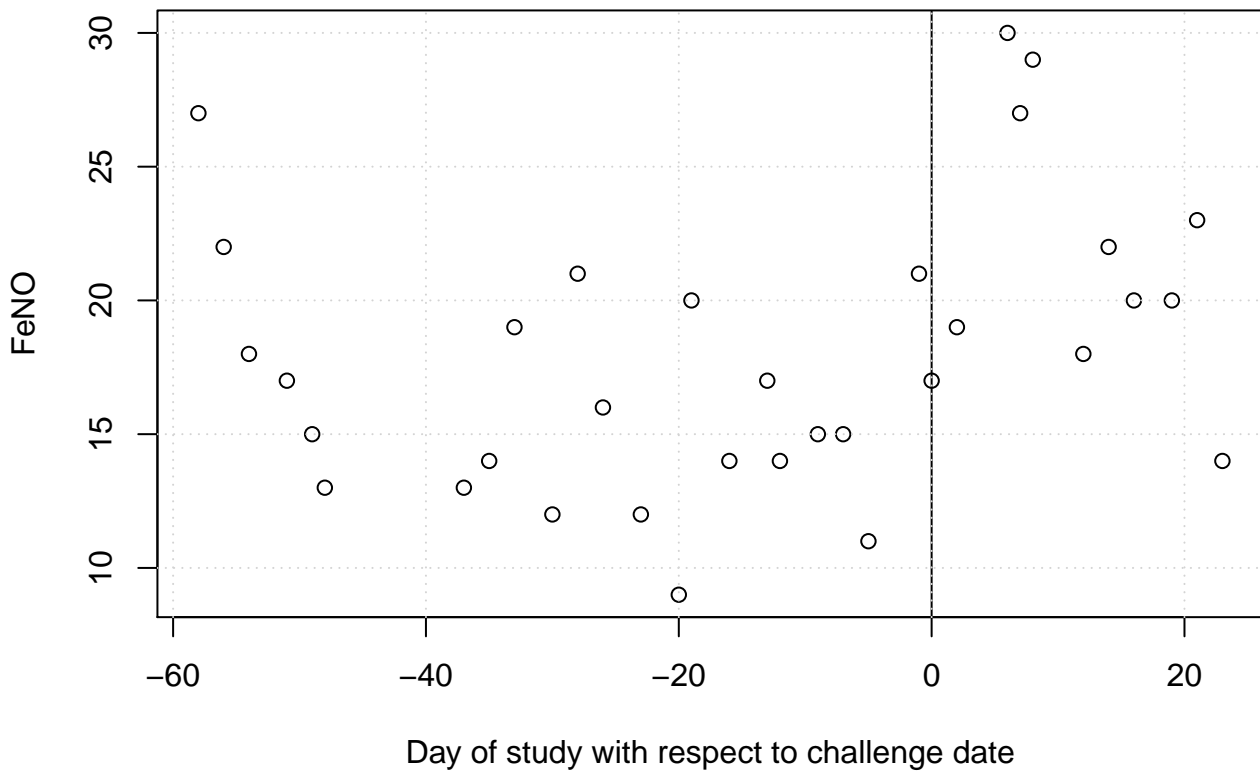

# P03H

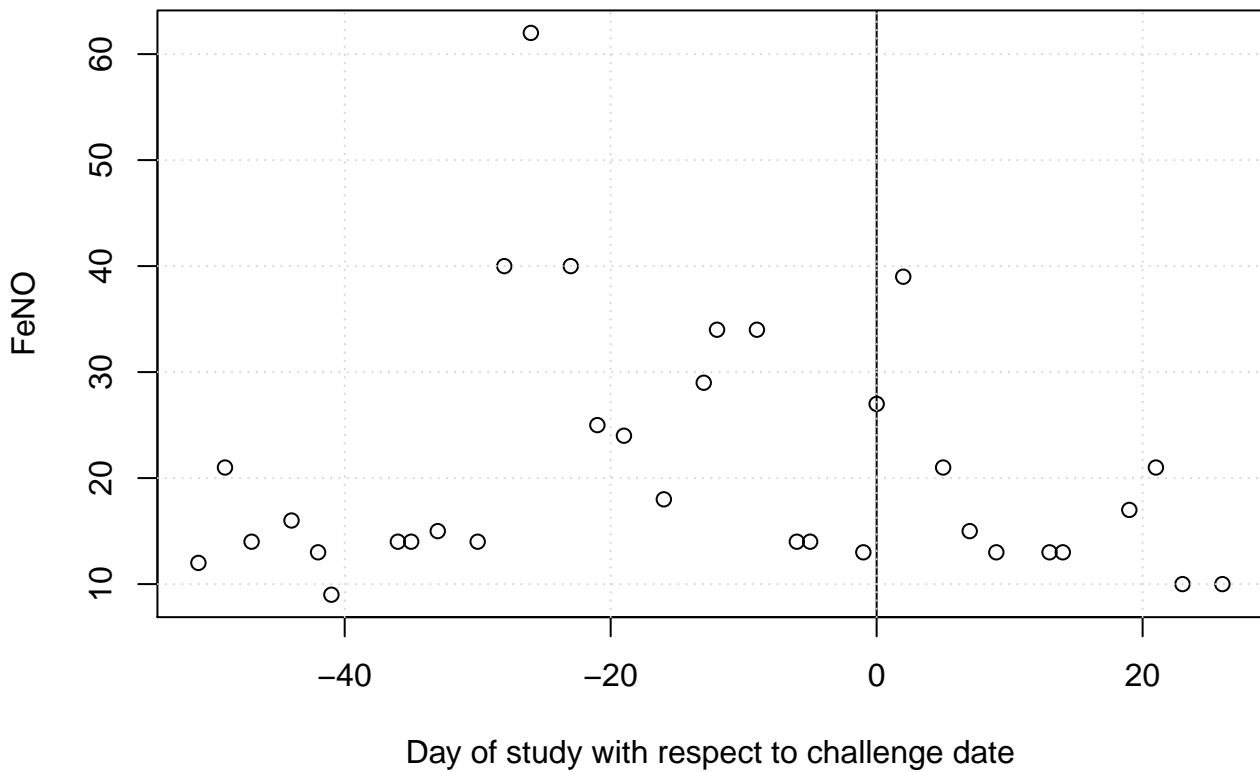

# P05H

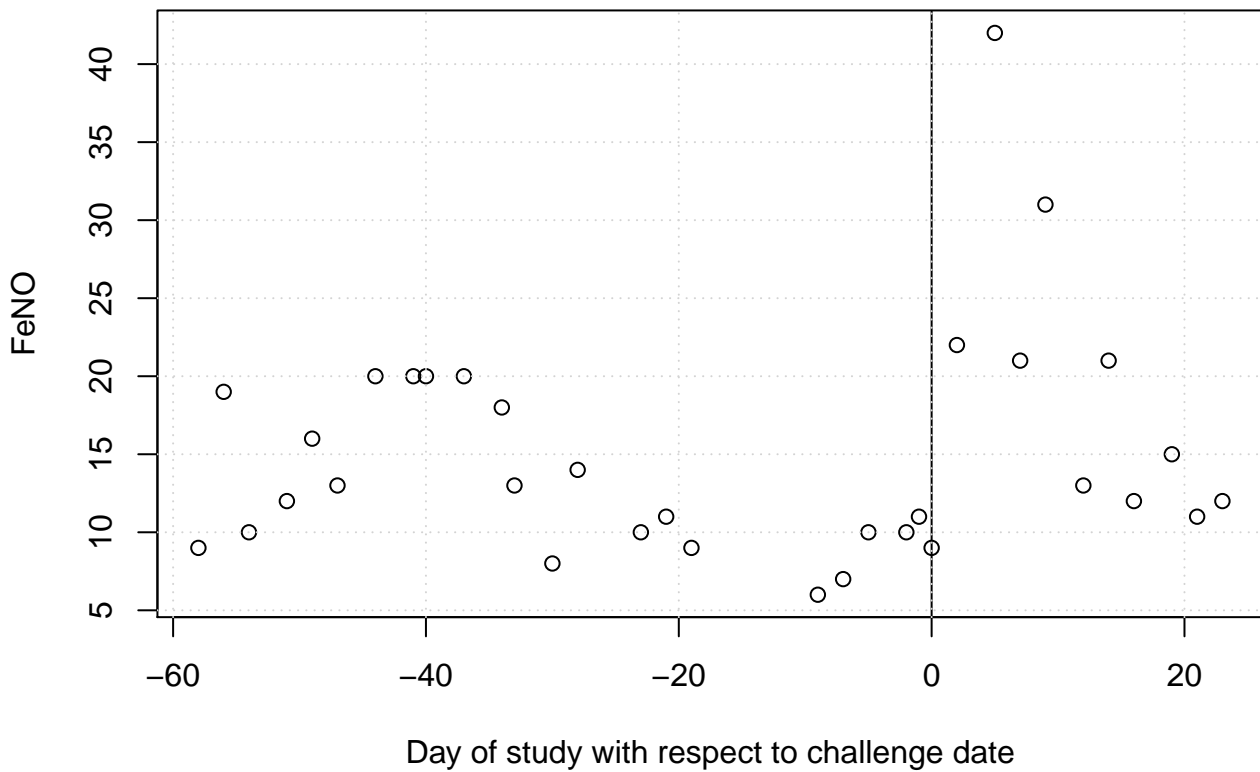

# P06H

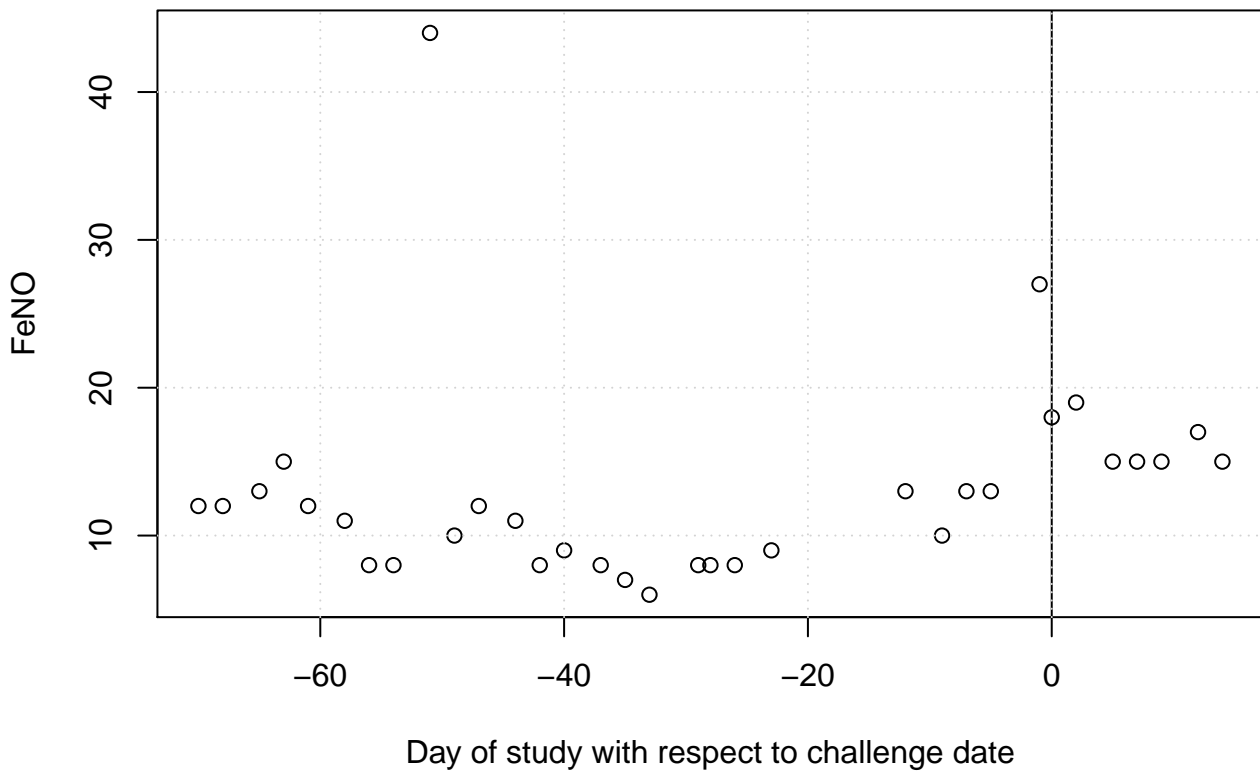



# P07H

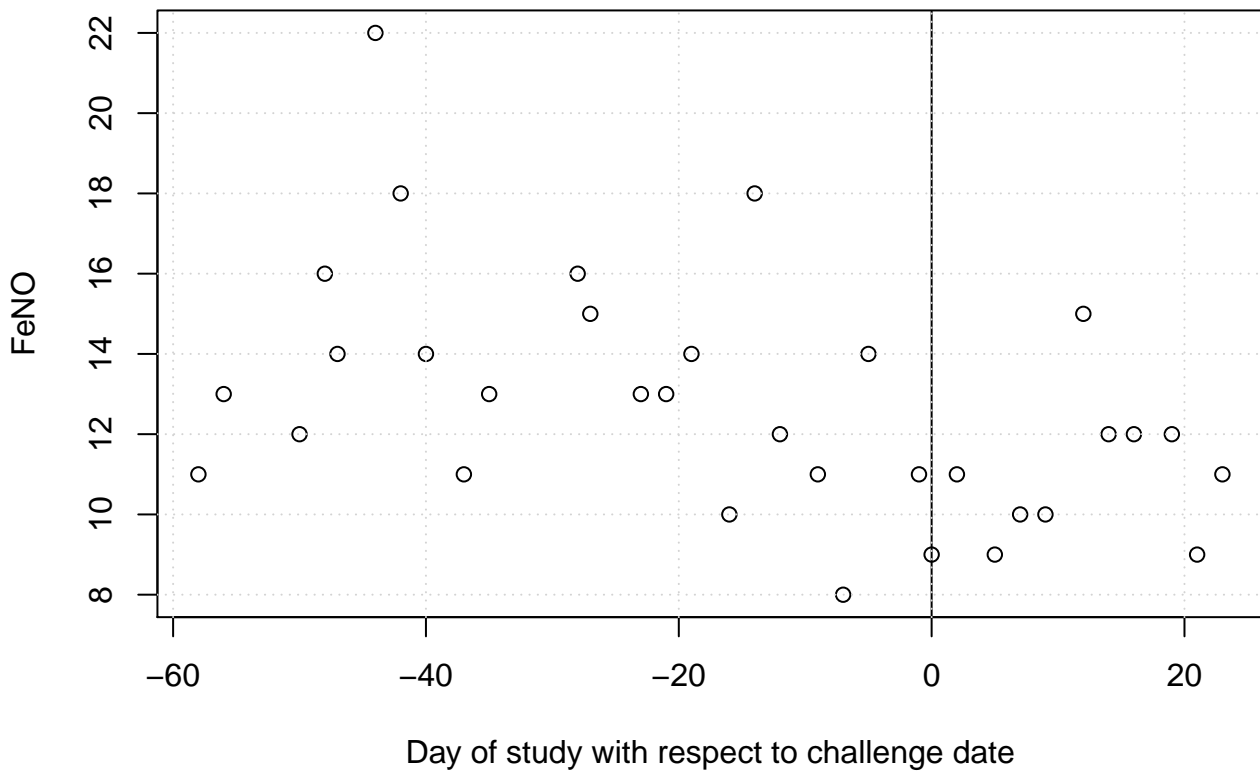

# P08H

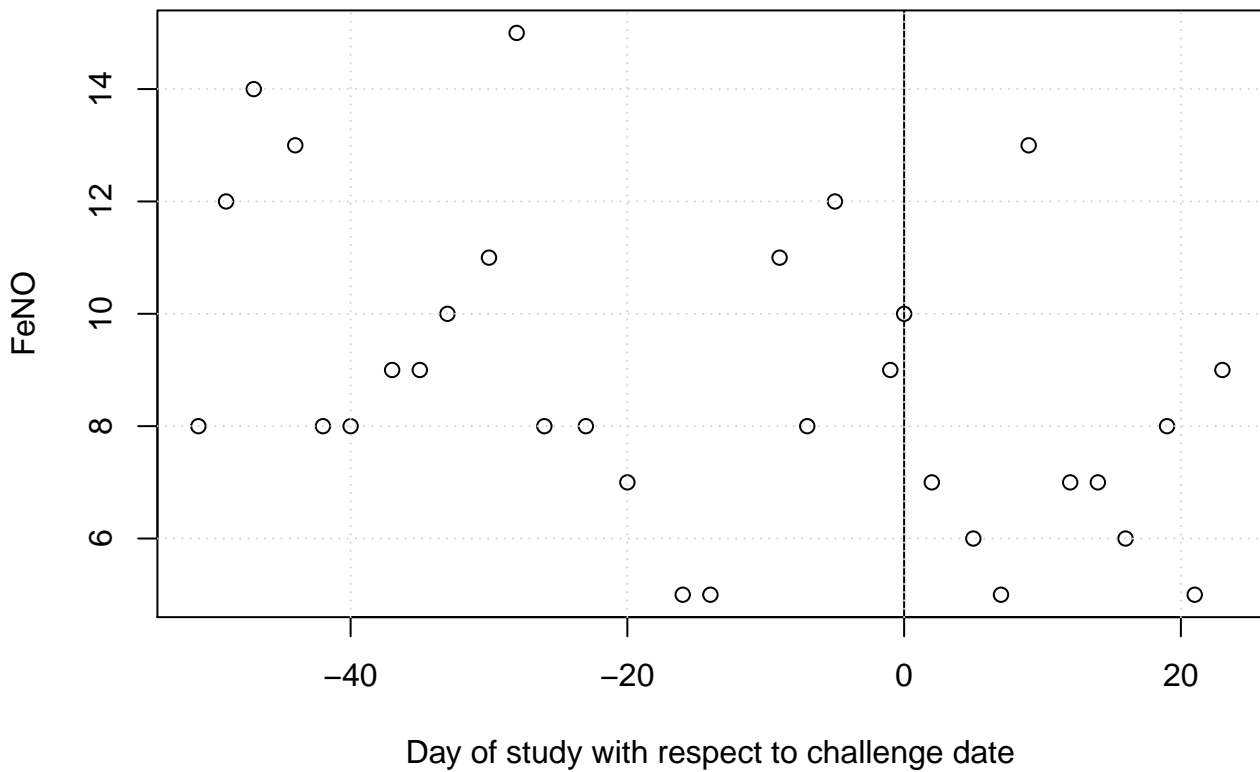

**P09H**

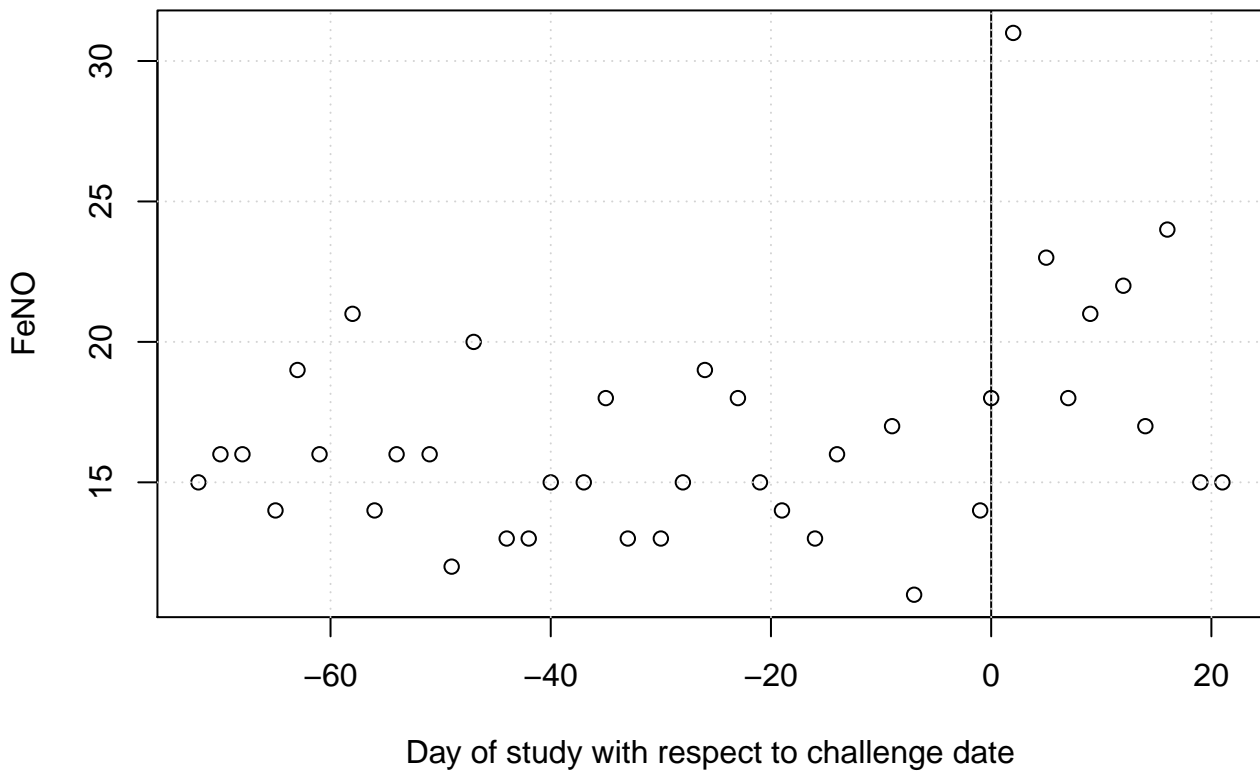

# P11H

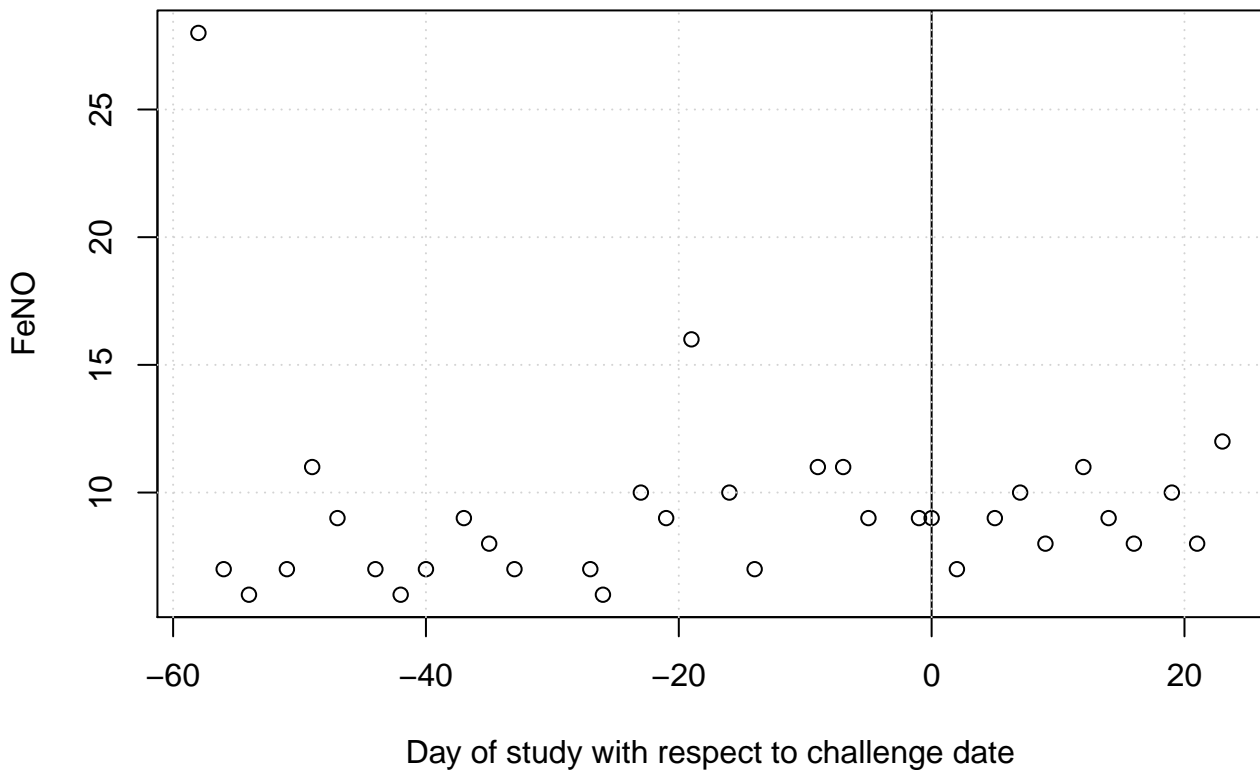

# P12H

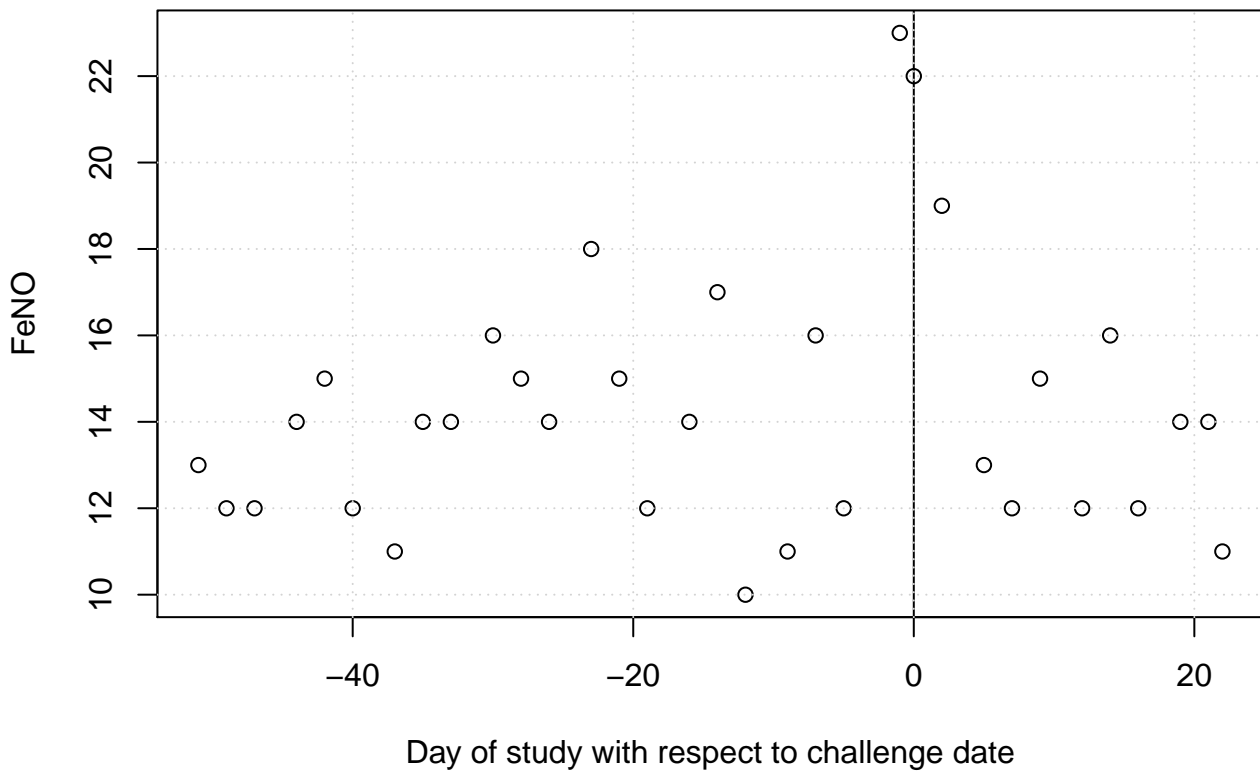

# P13H

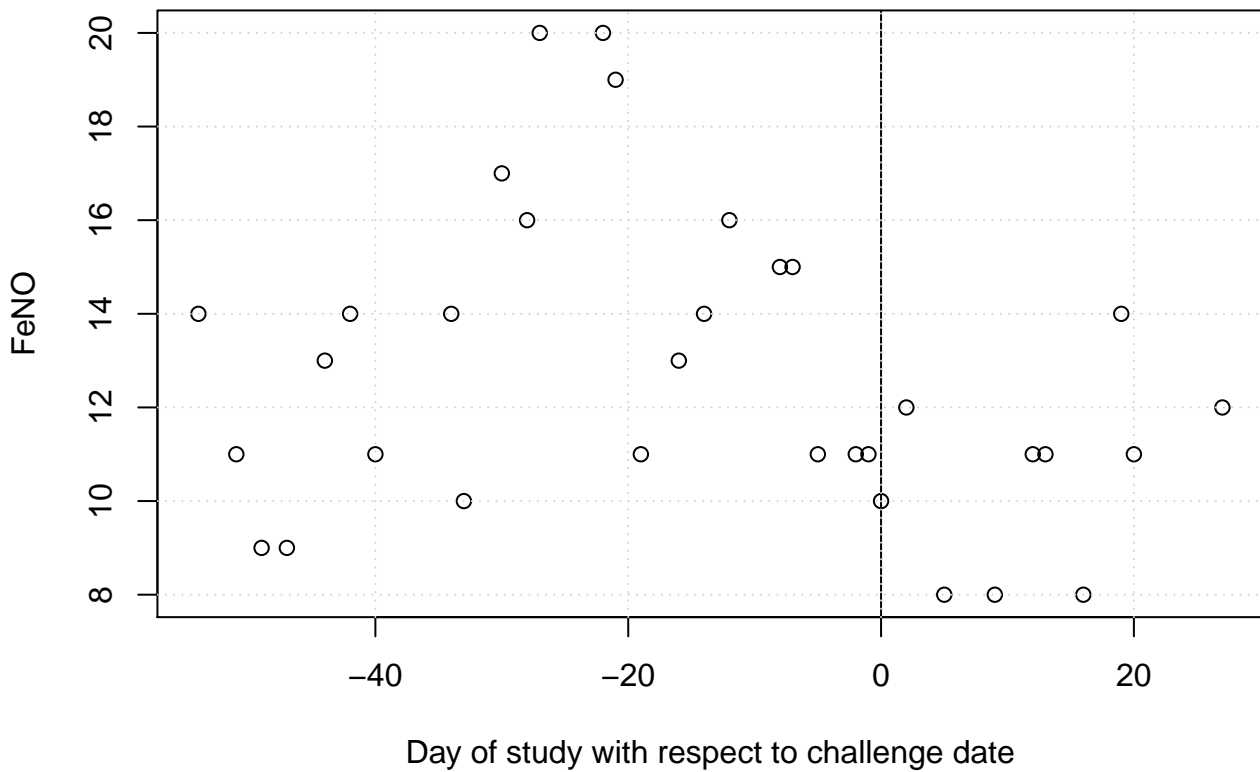

# P14H

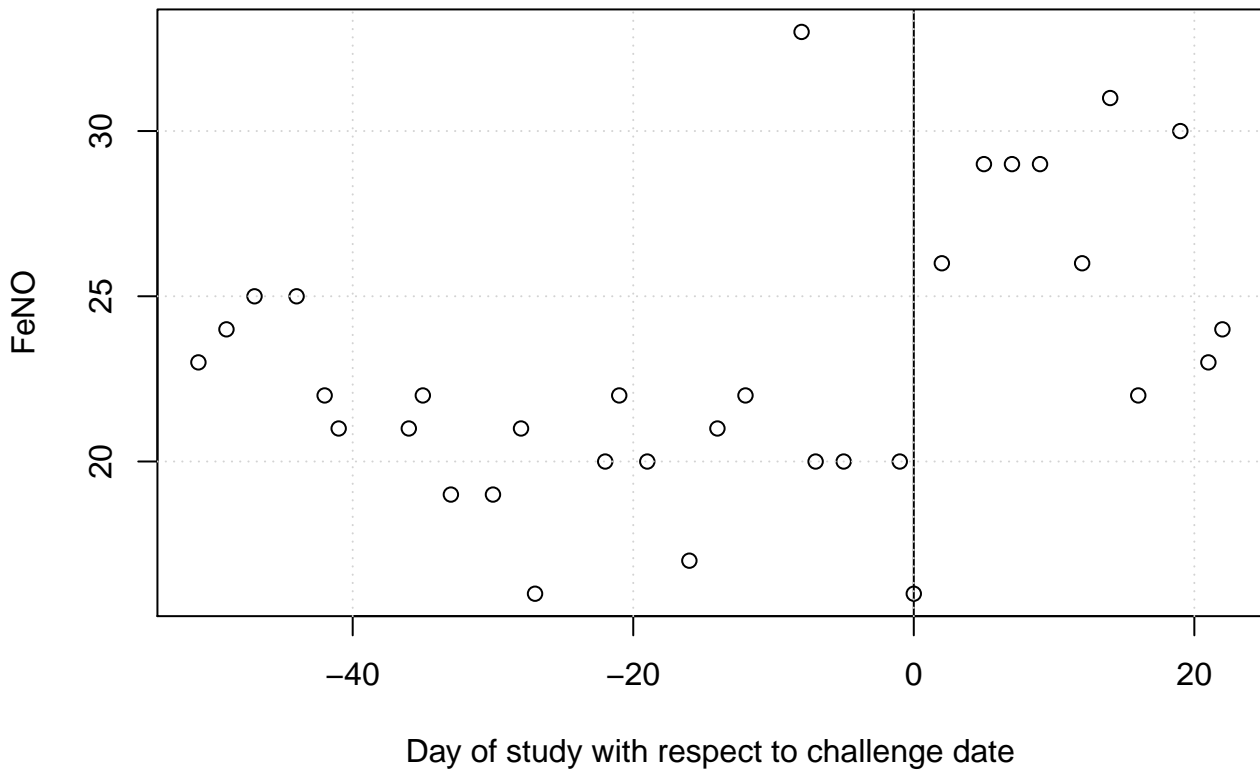

# P15H

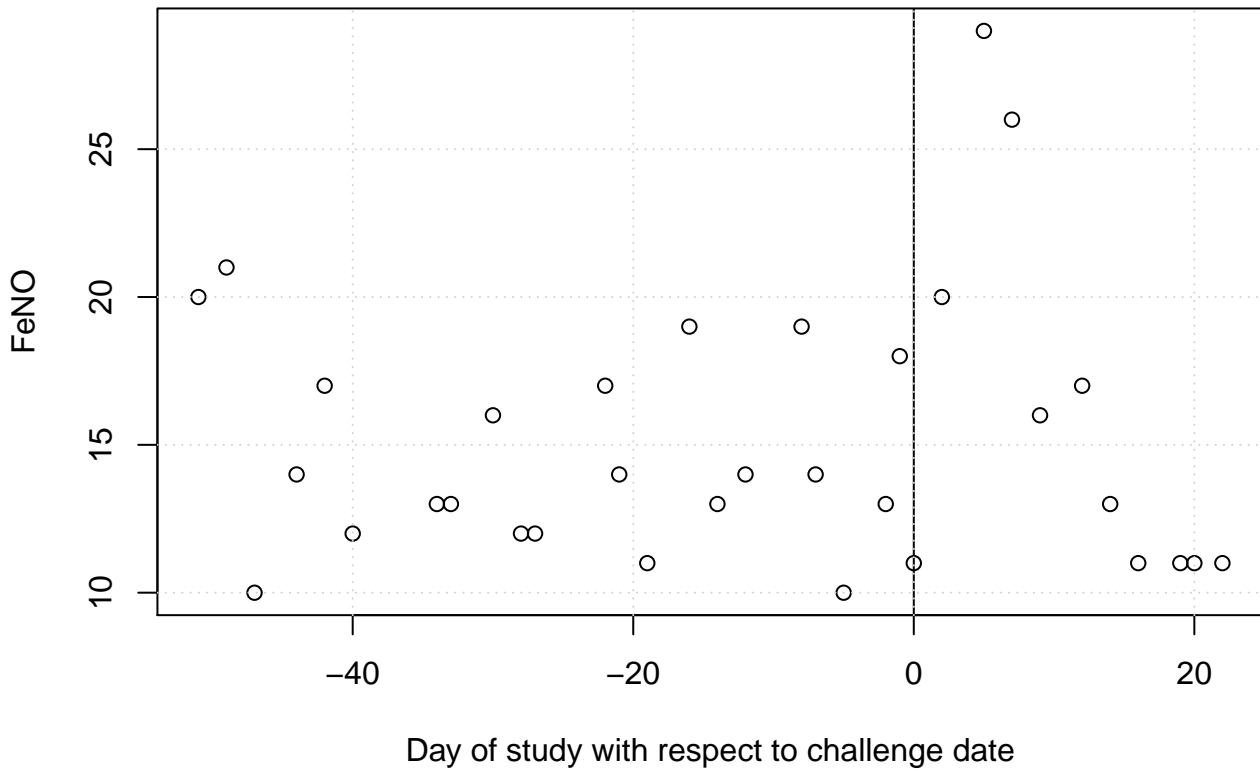



# P01A

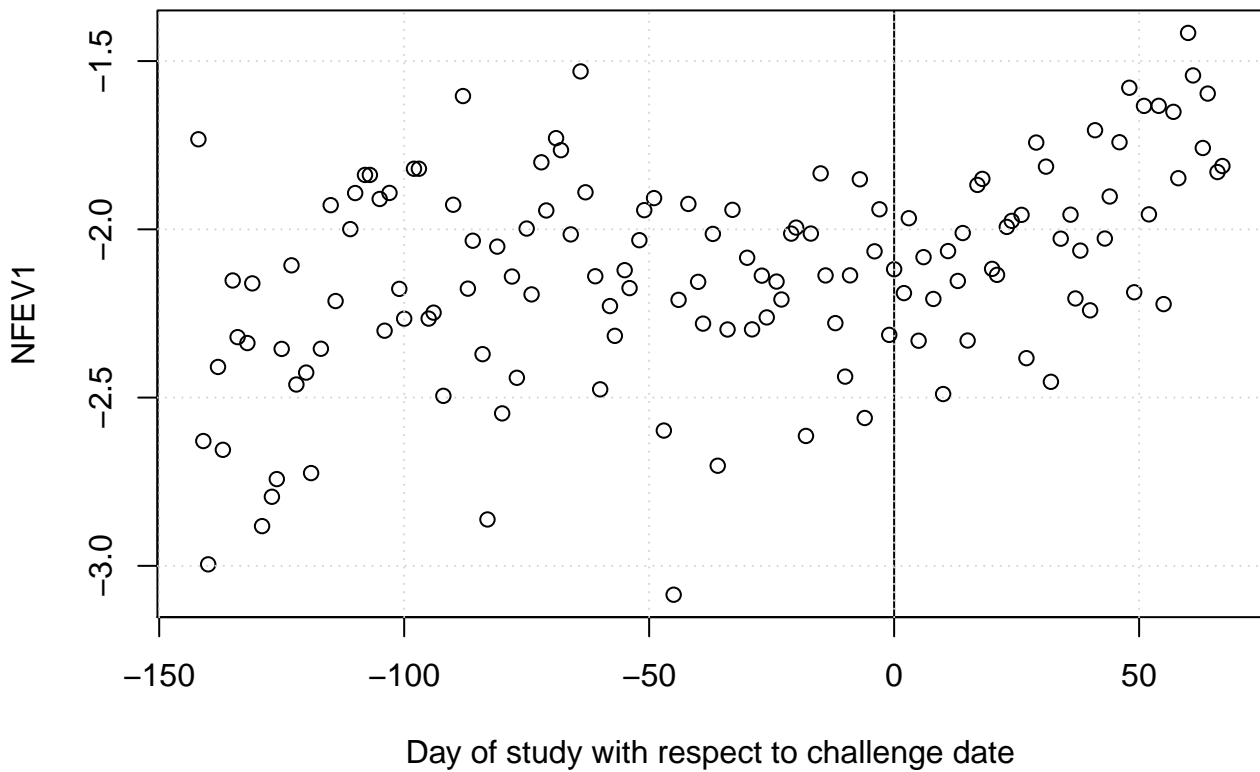

## P02A

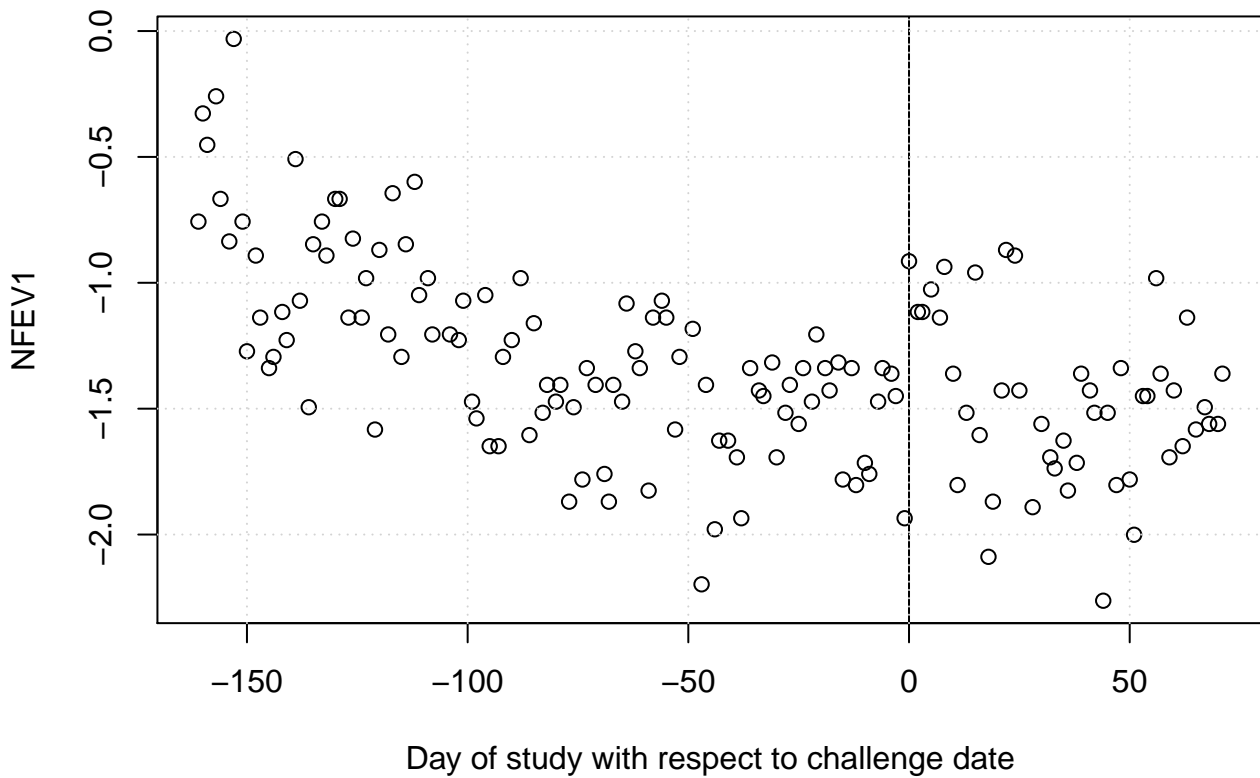

**P04A**

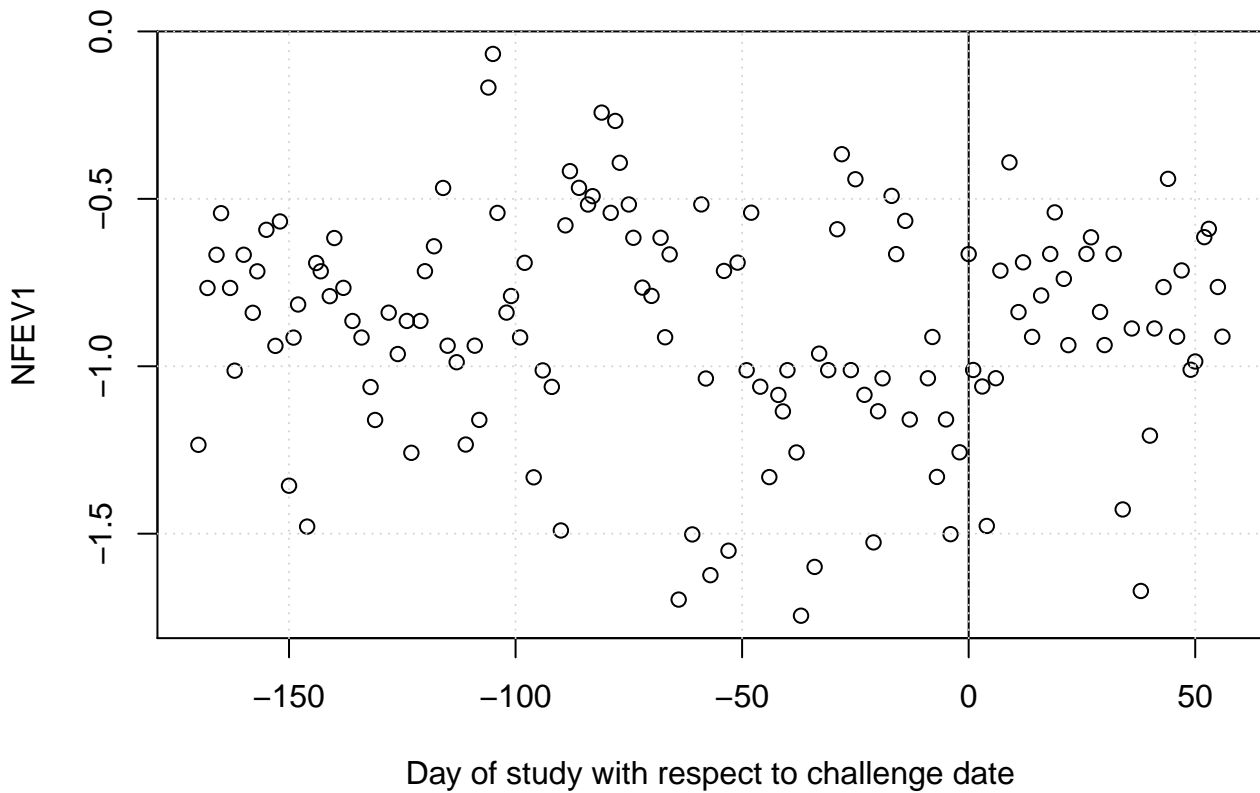

# P05A

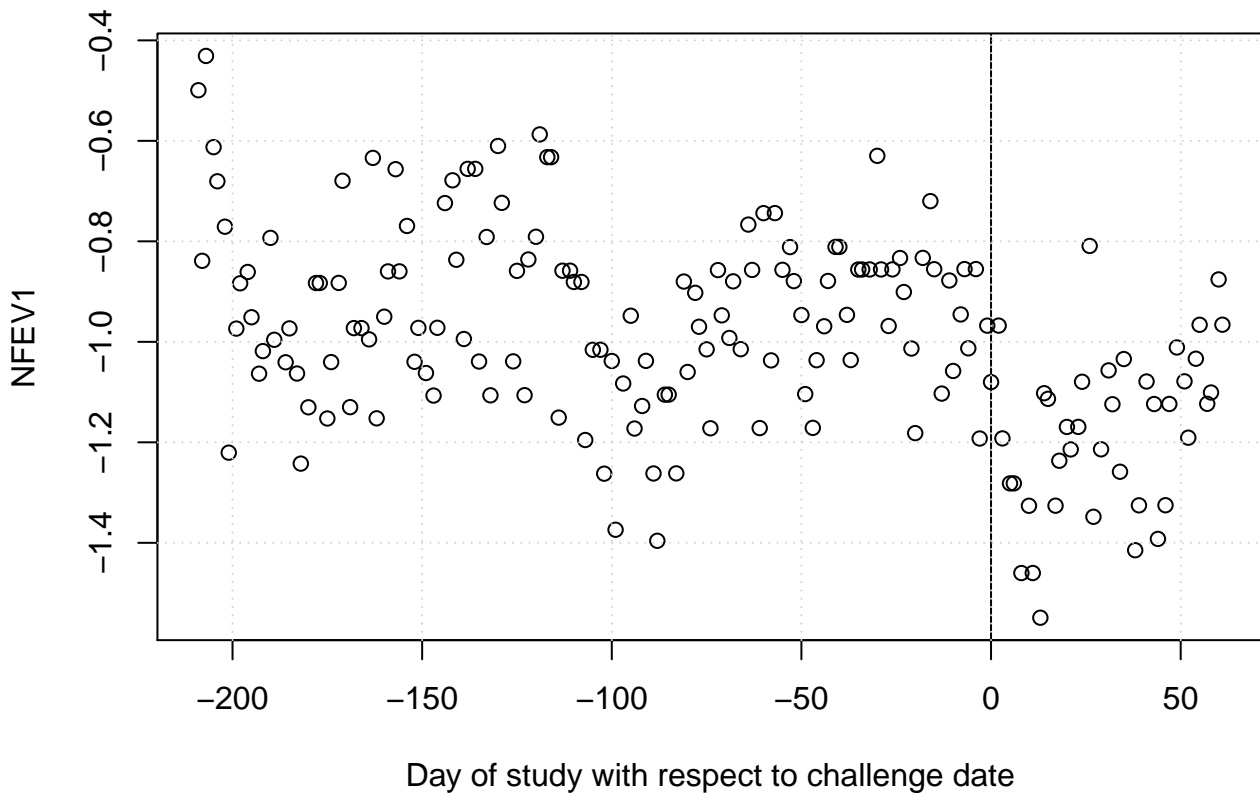

**P06A**

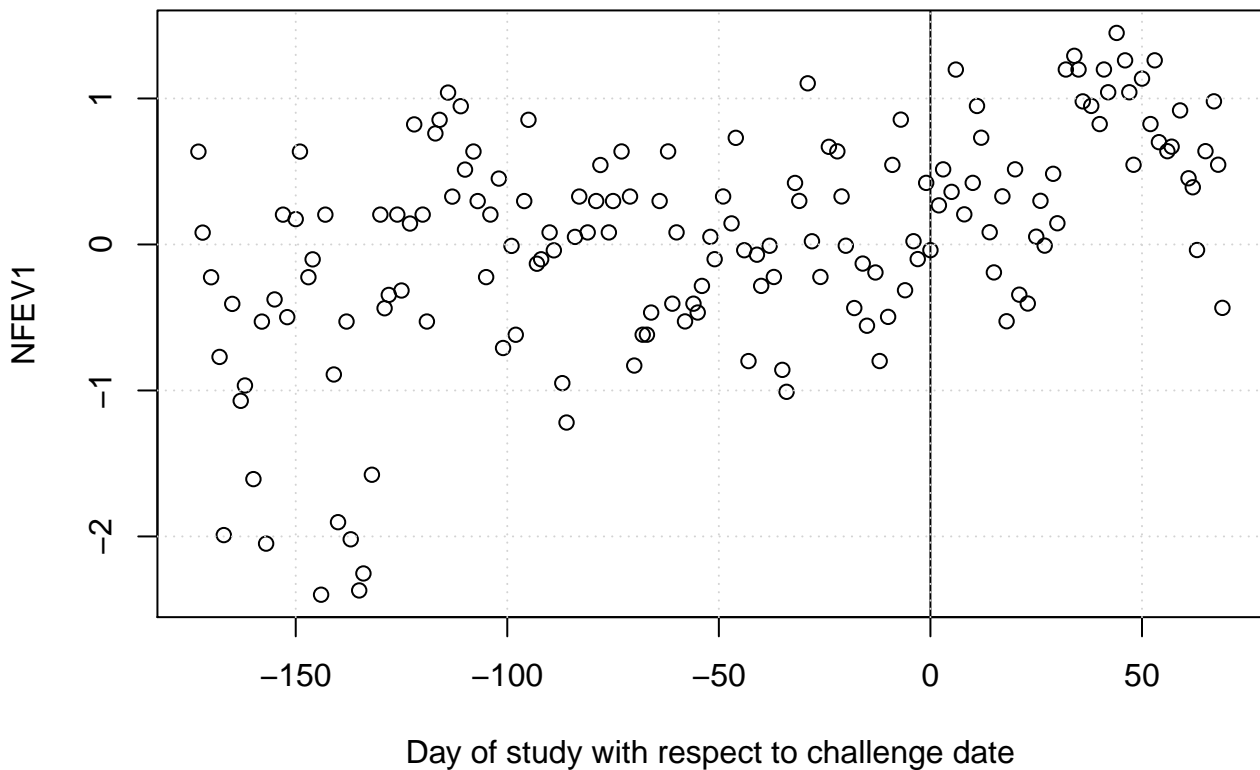

**P07A**

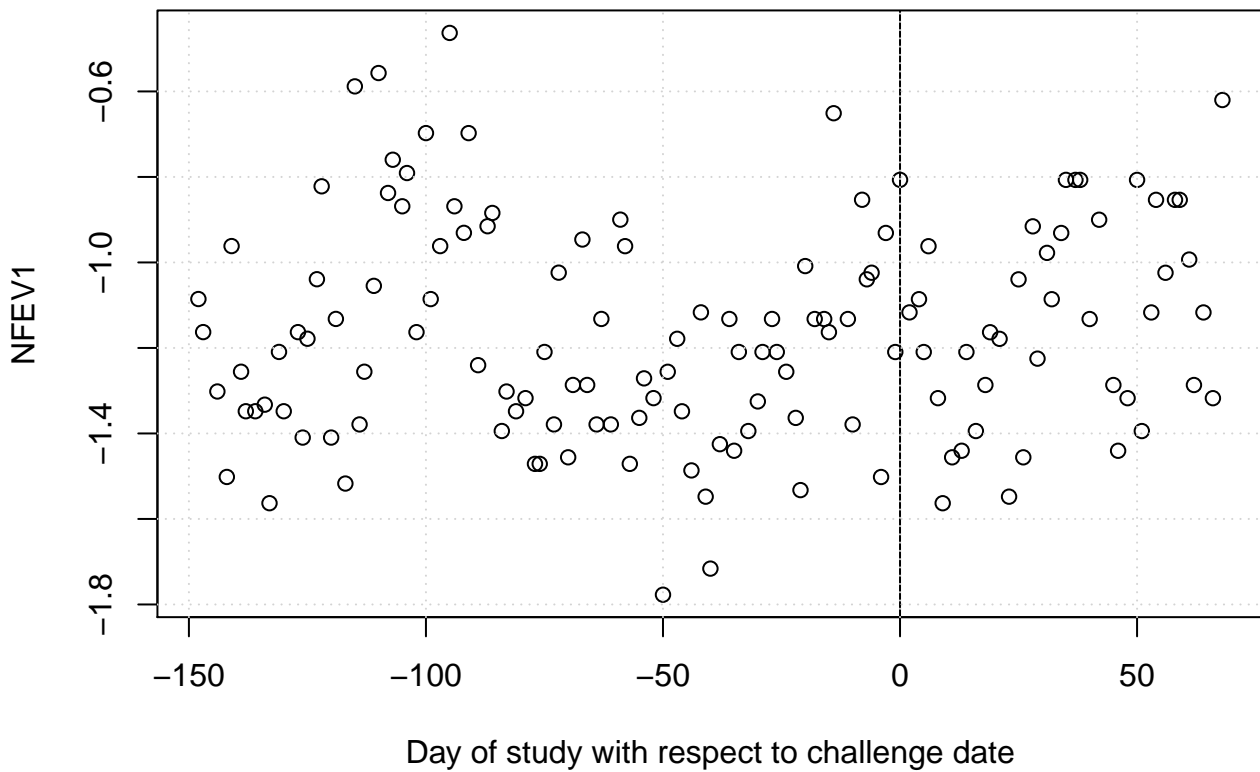

**P08A**

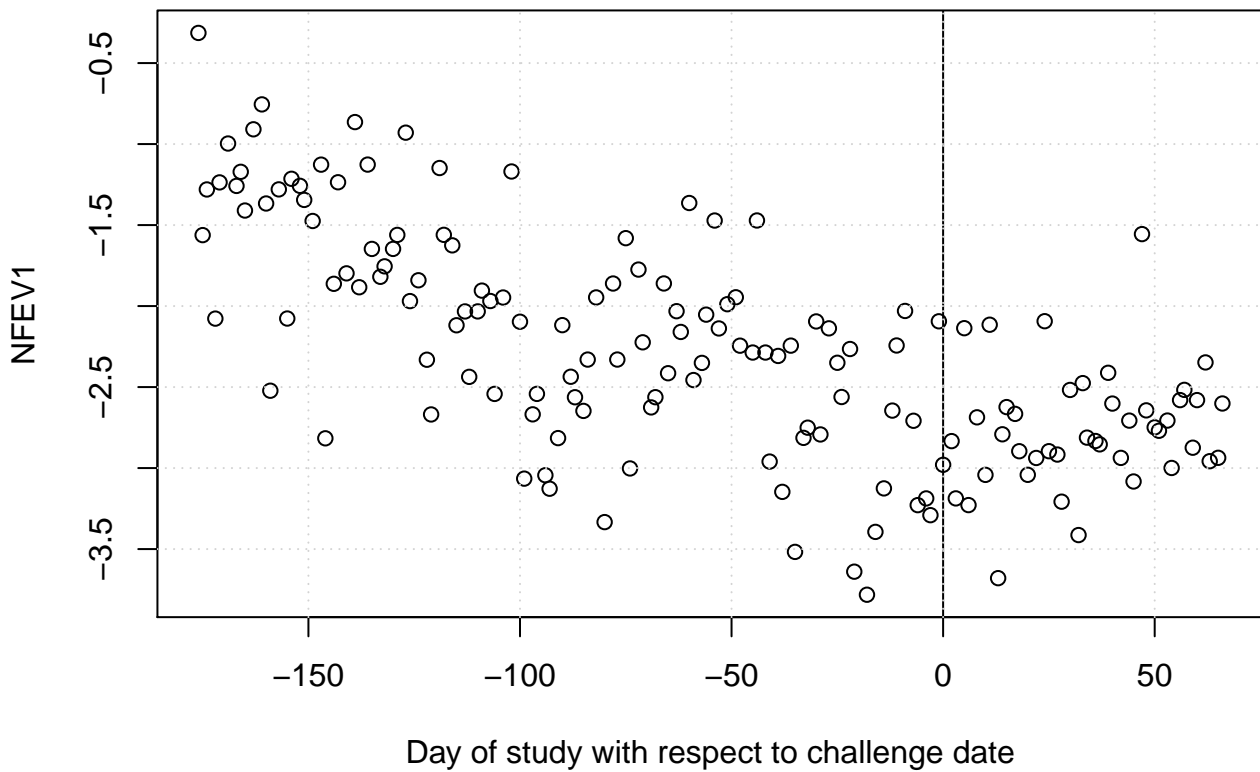

**P09A**

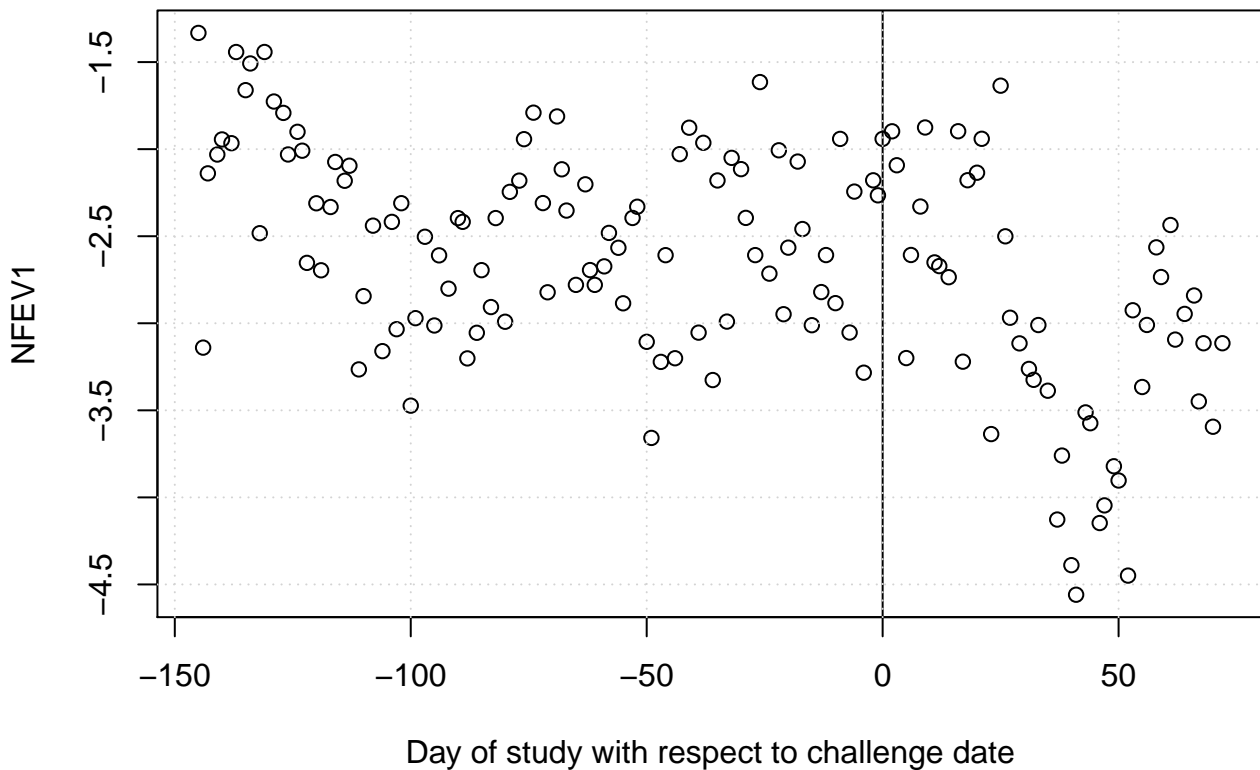



# P10A

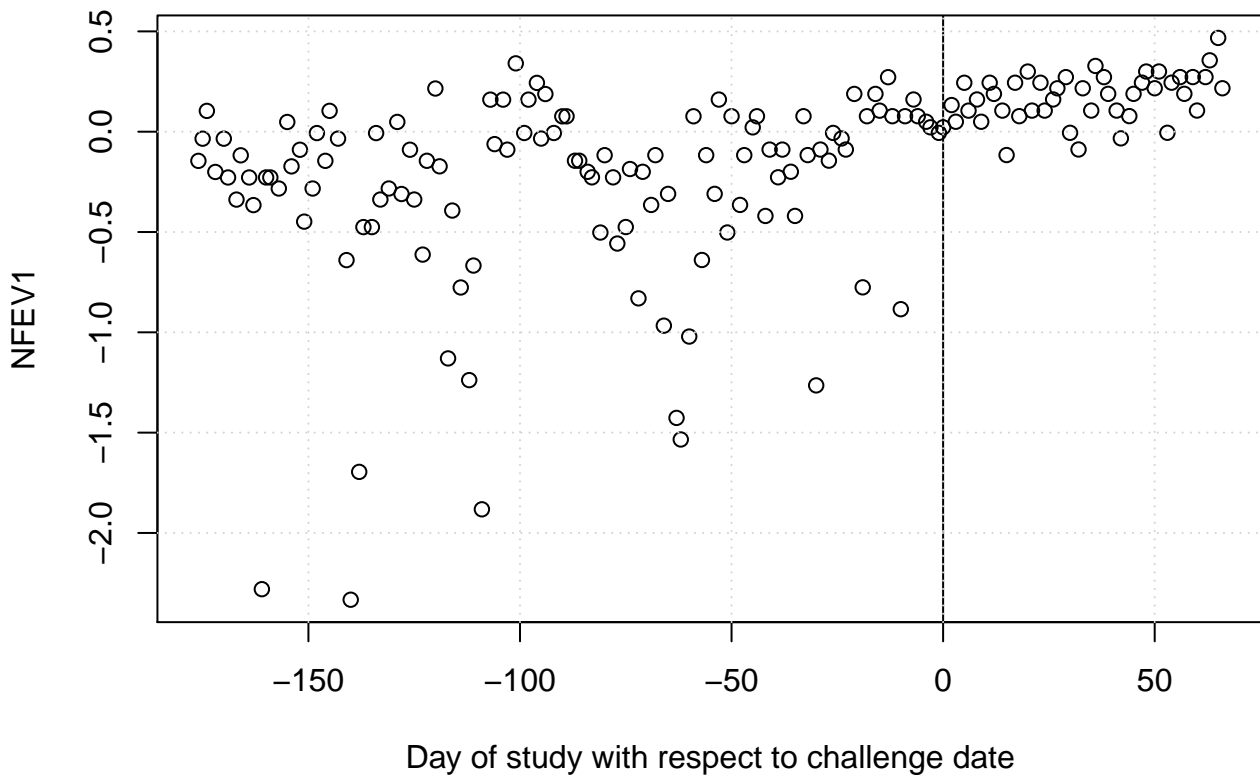

# P11A

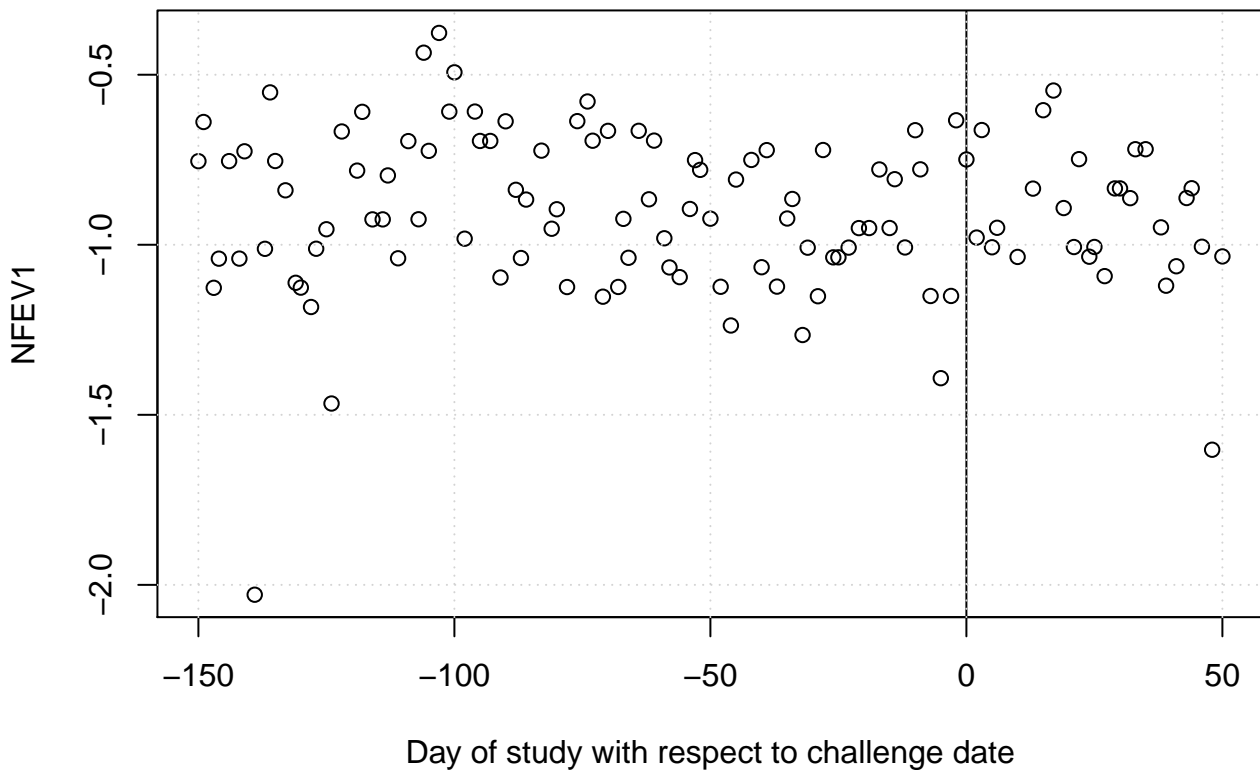

# P12A

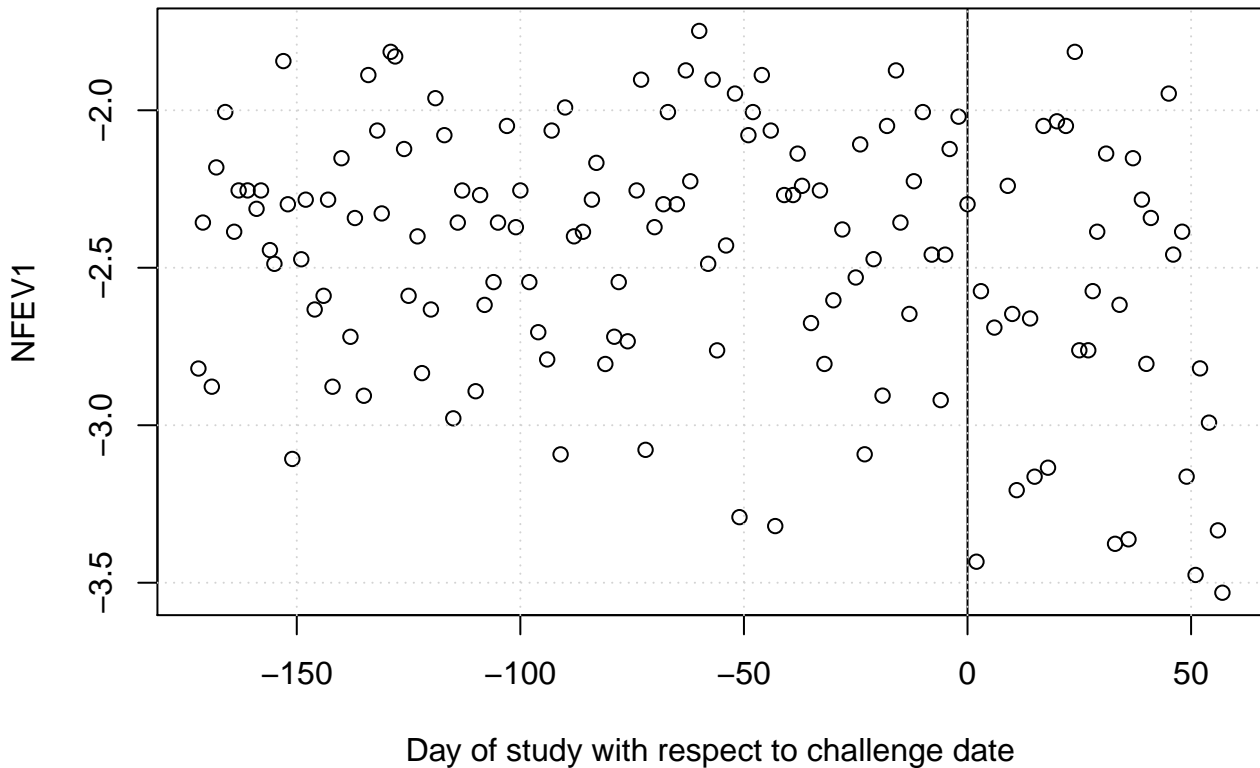

# P13A

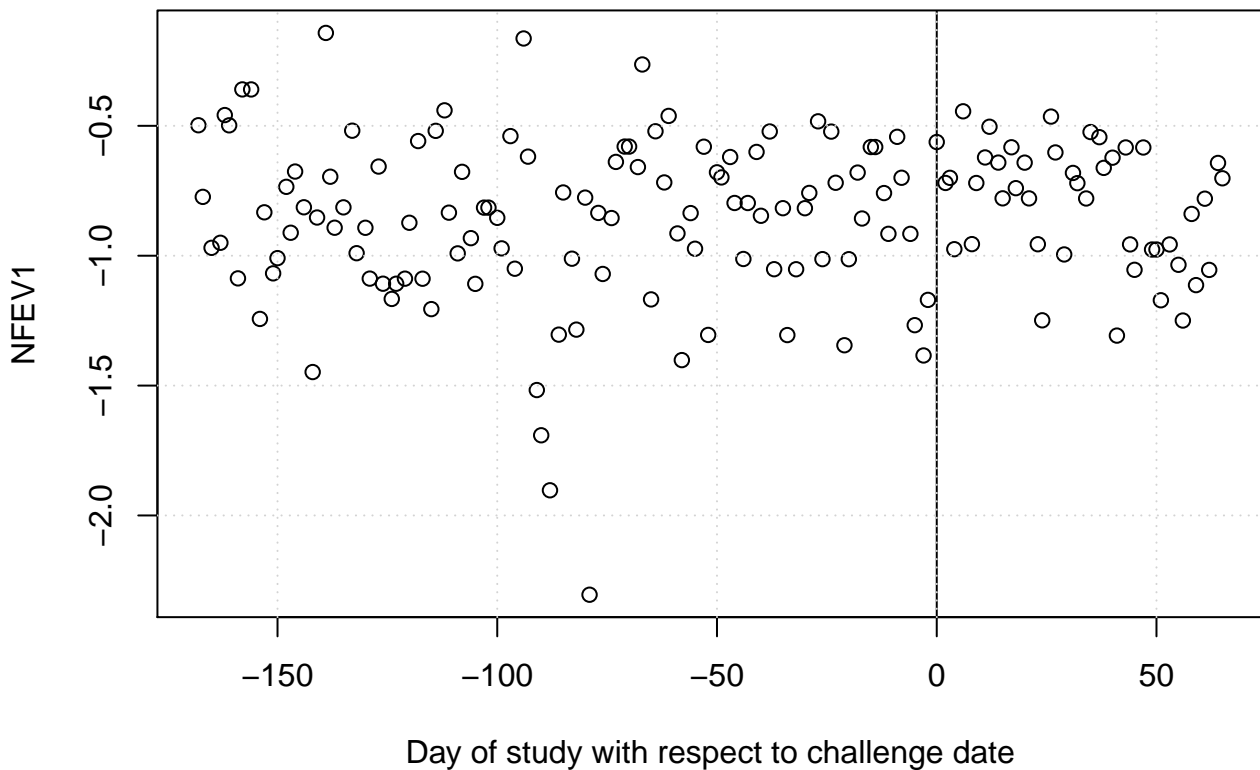

# P01H

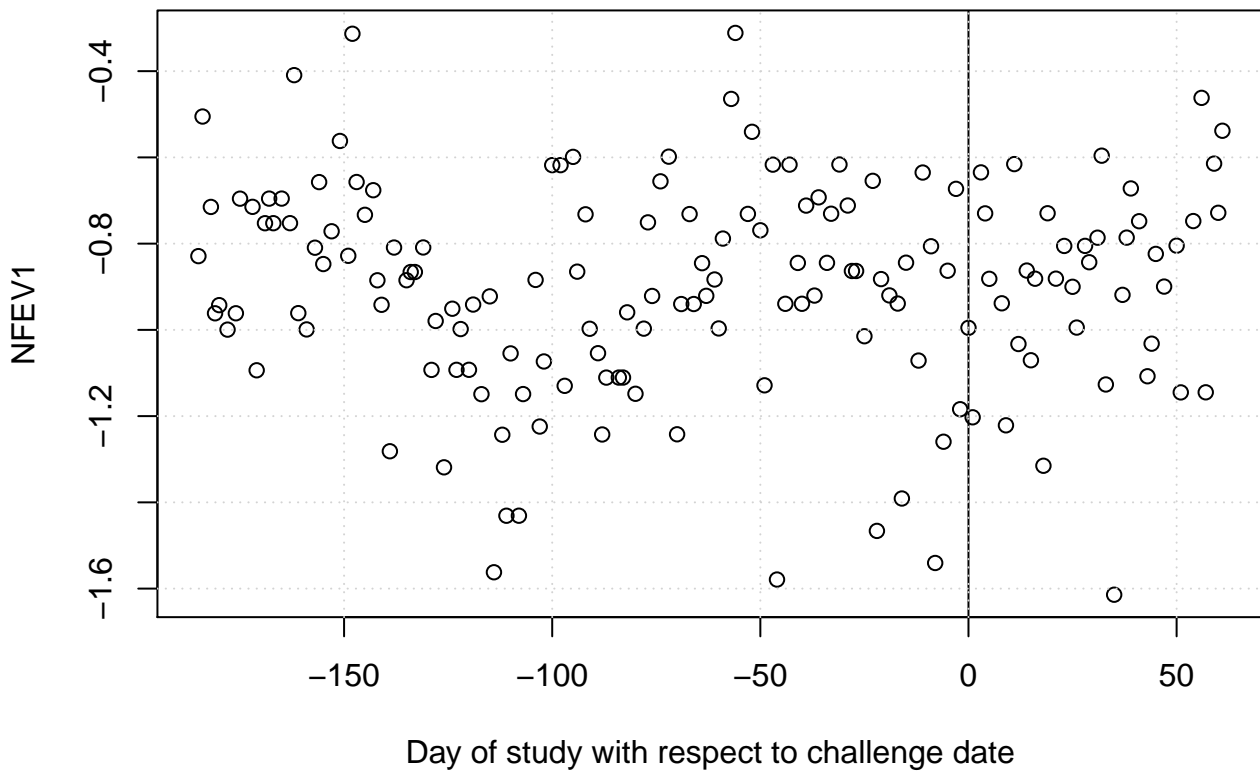

# P03H

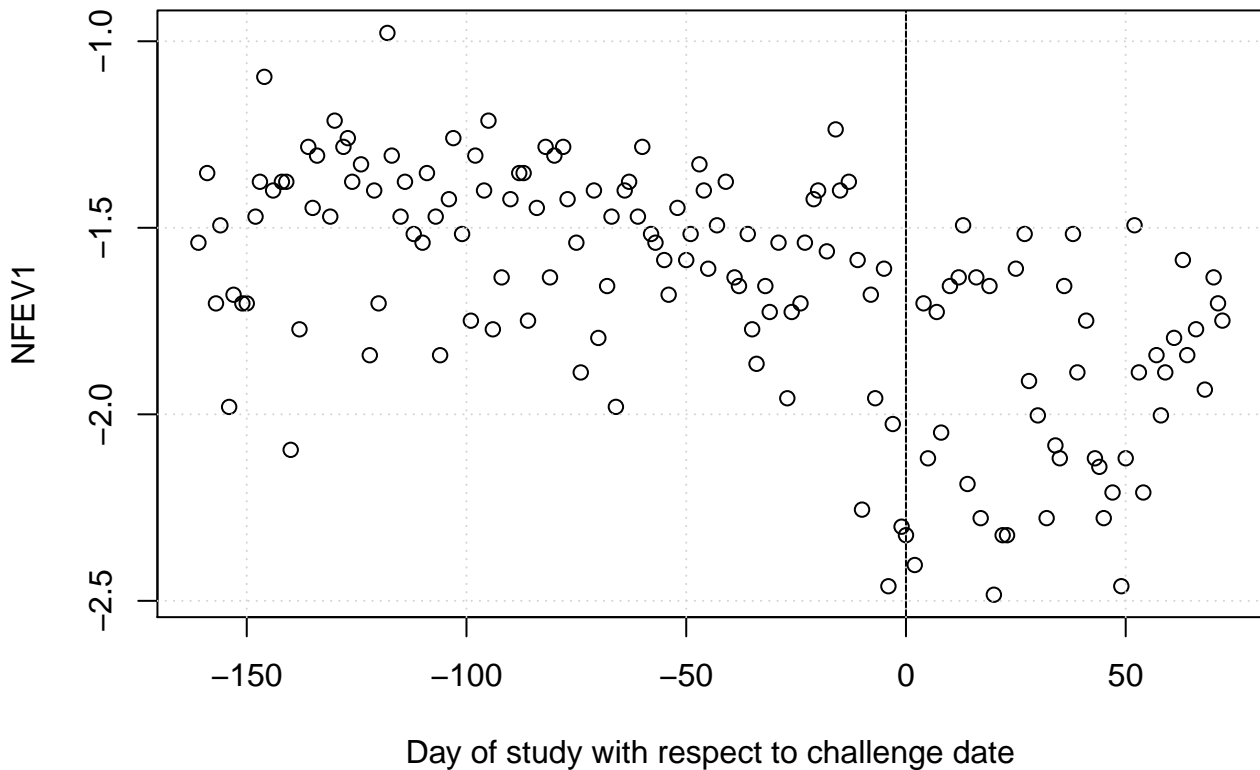

# P05H

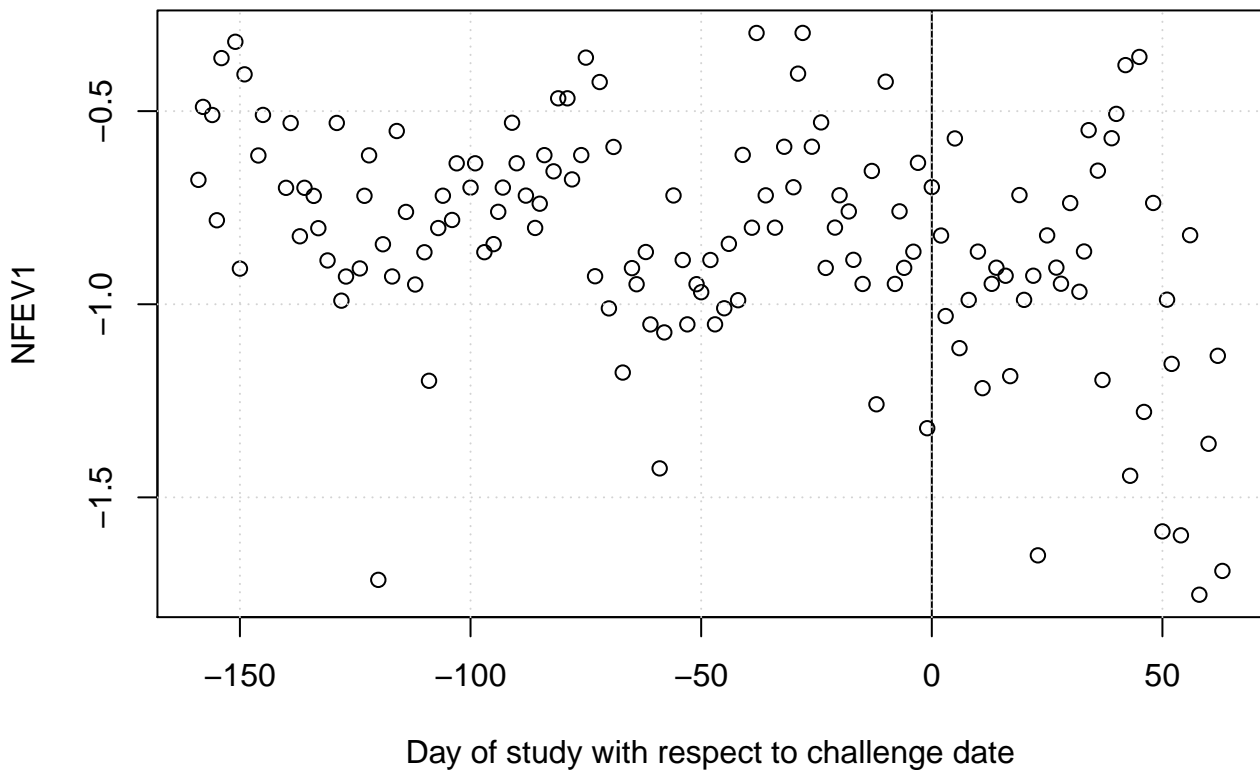

# P06H

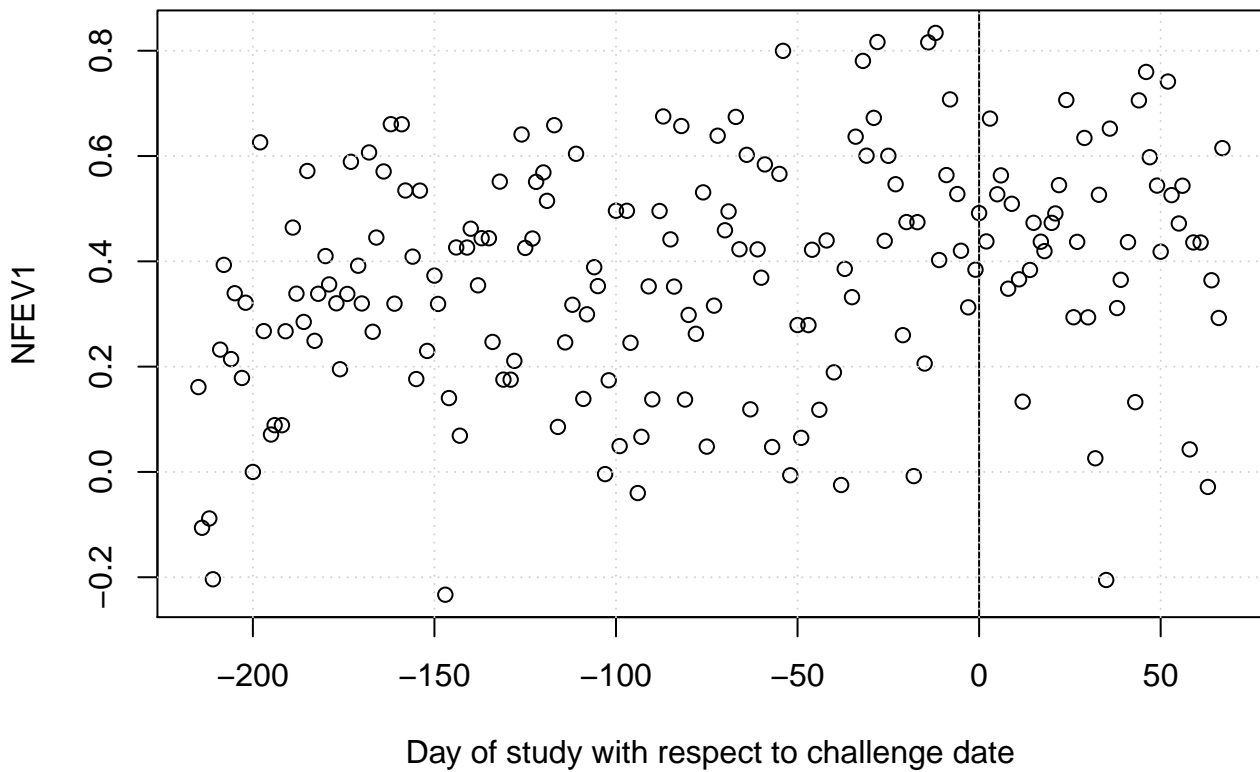



**P07H**

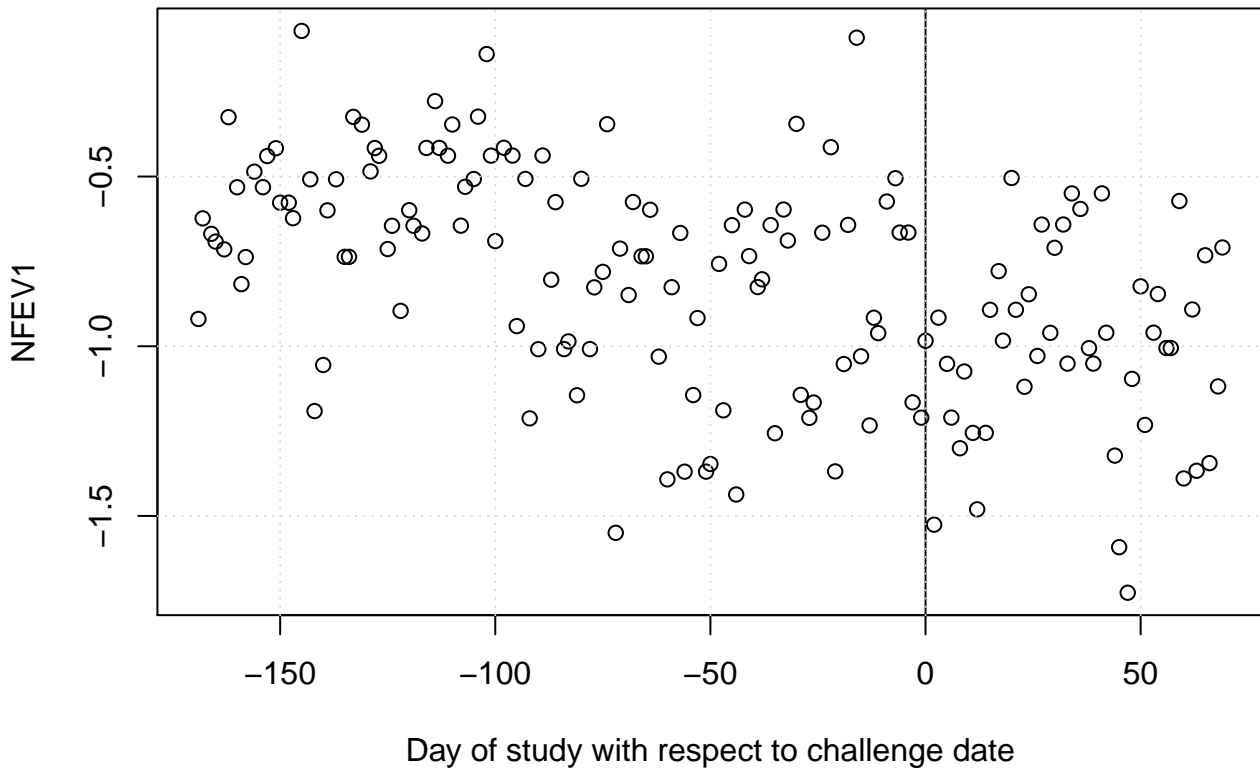

**P08H**

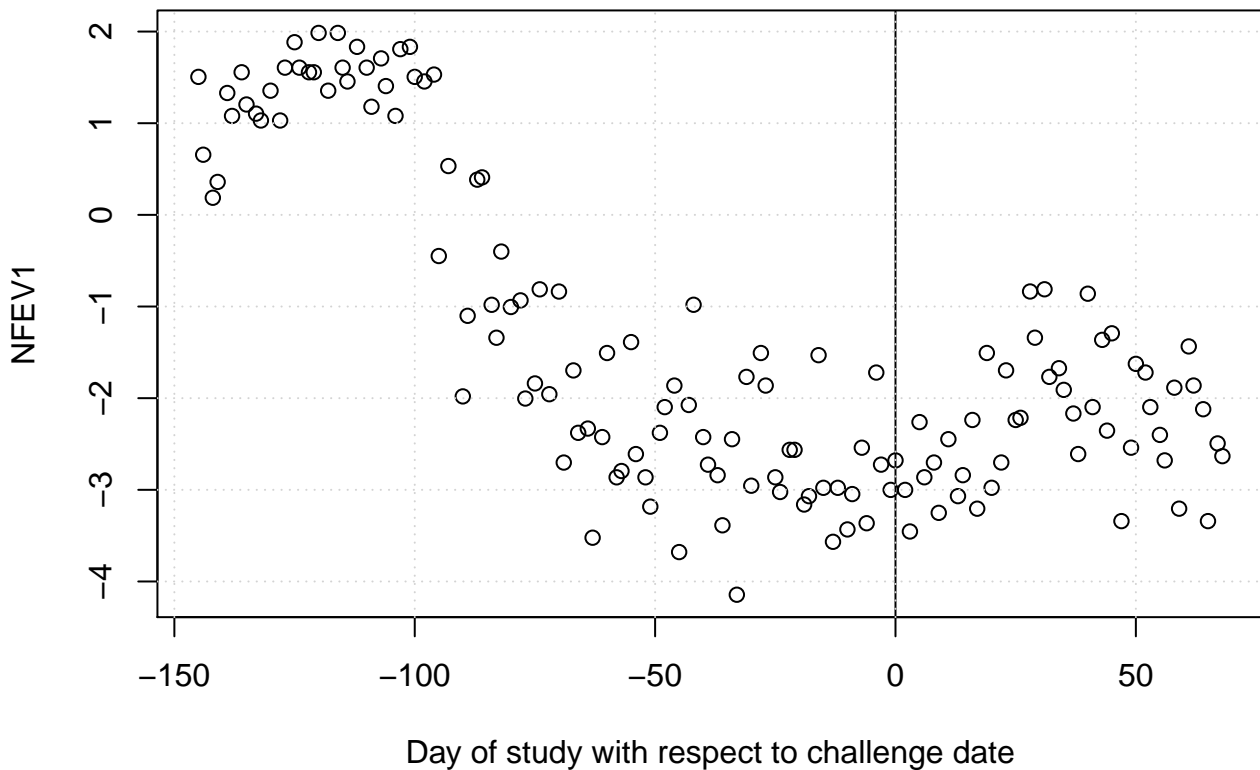

**P09H**

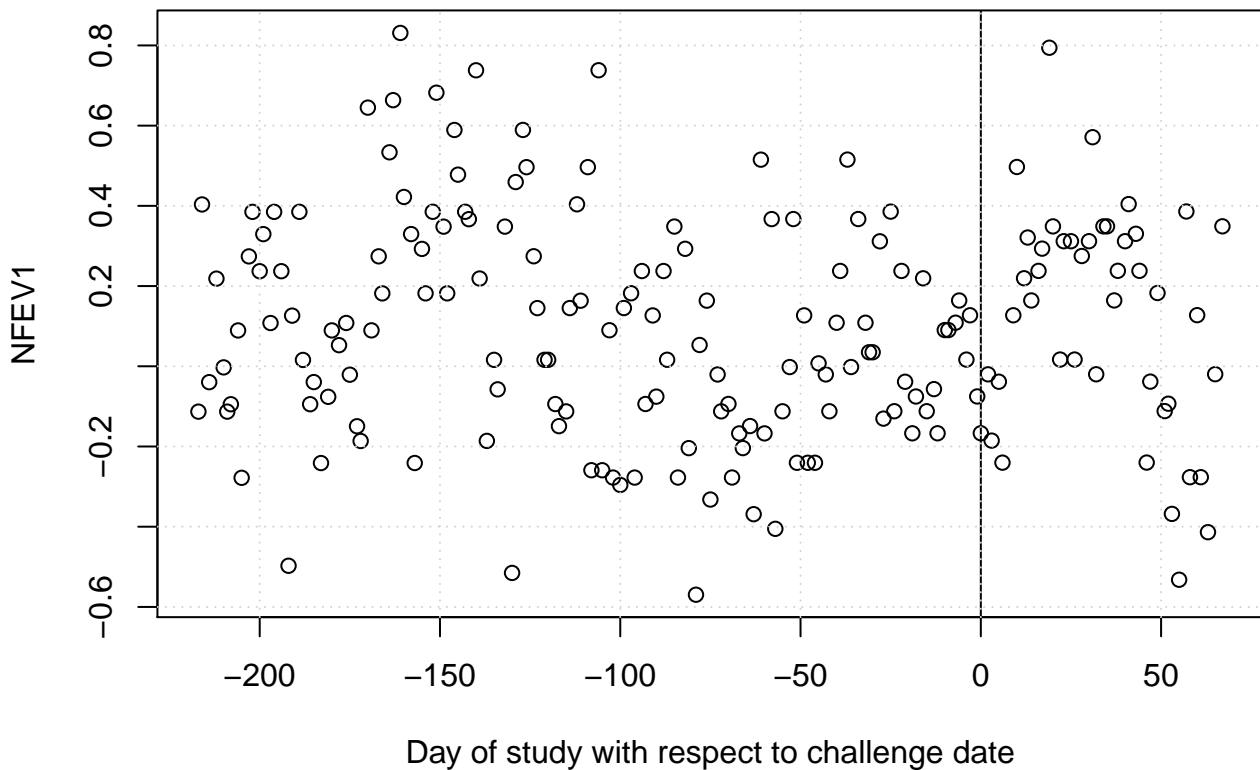

# P11H

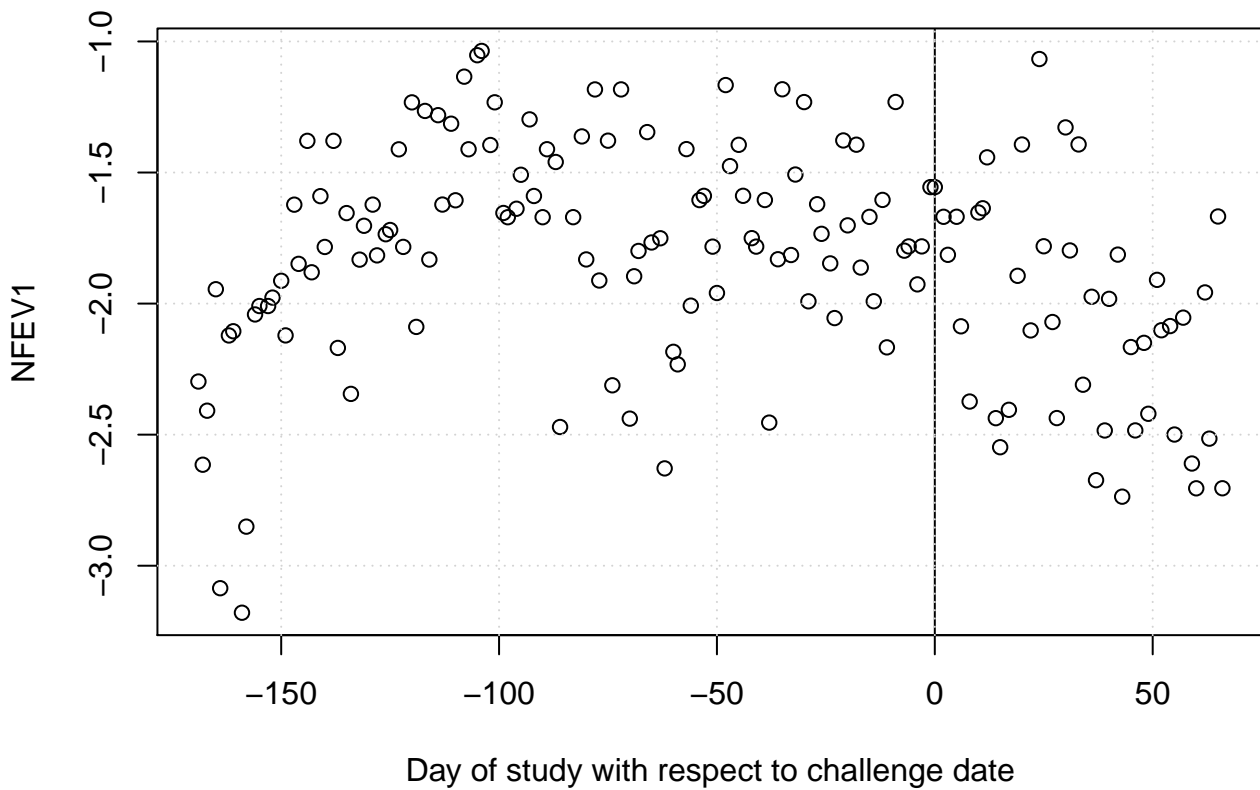

# P12H

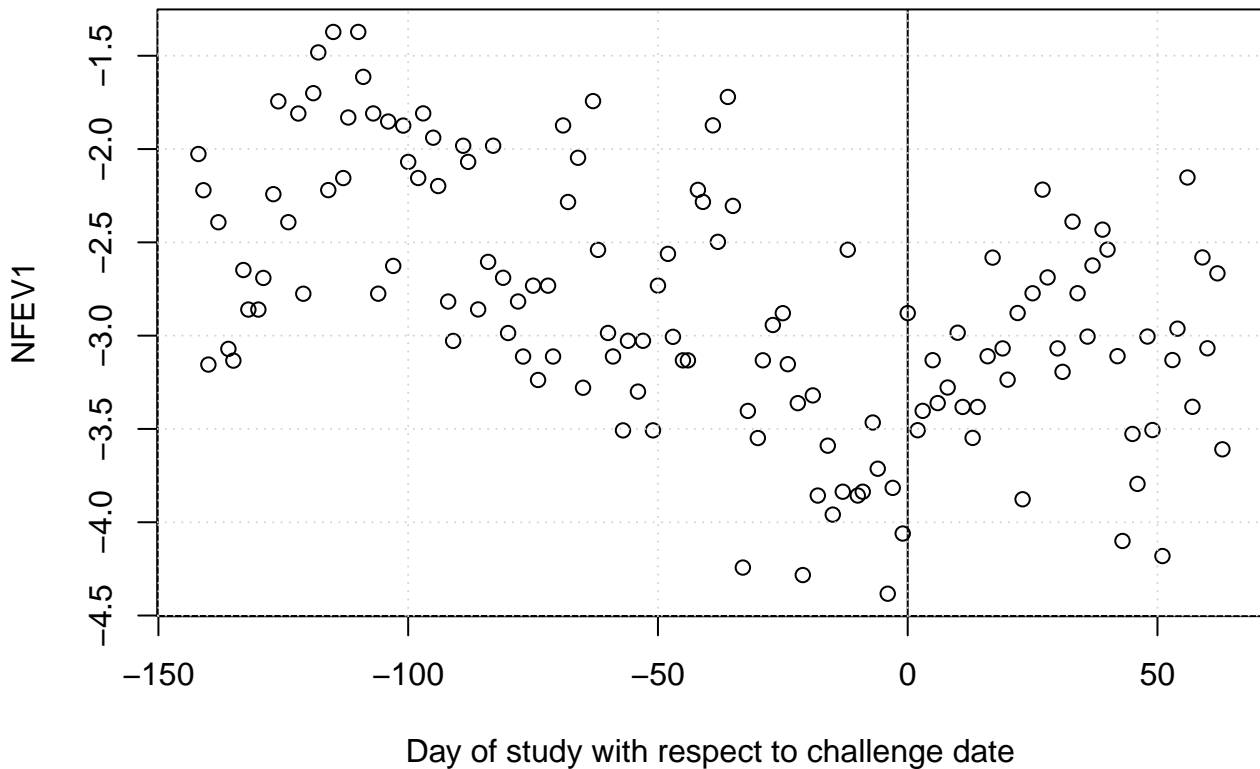

# P13H

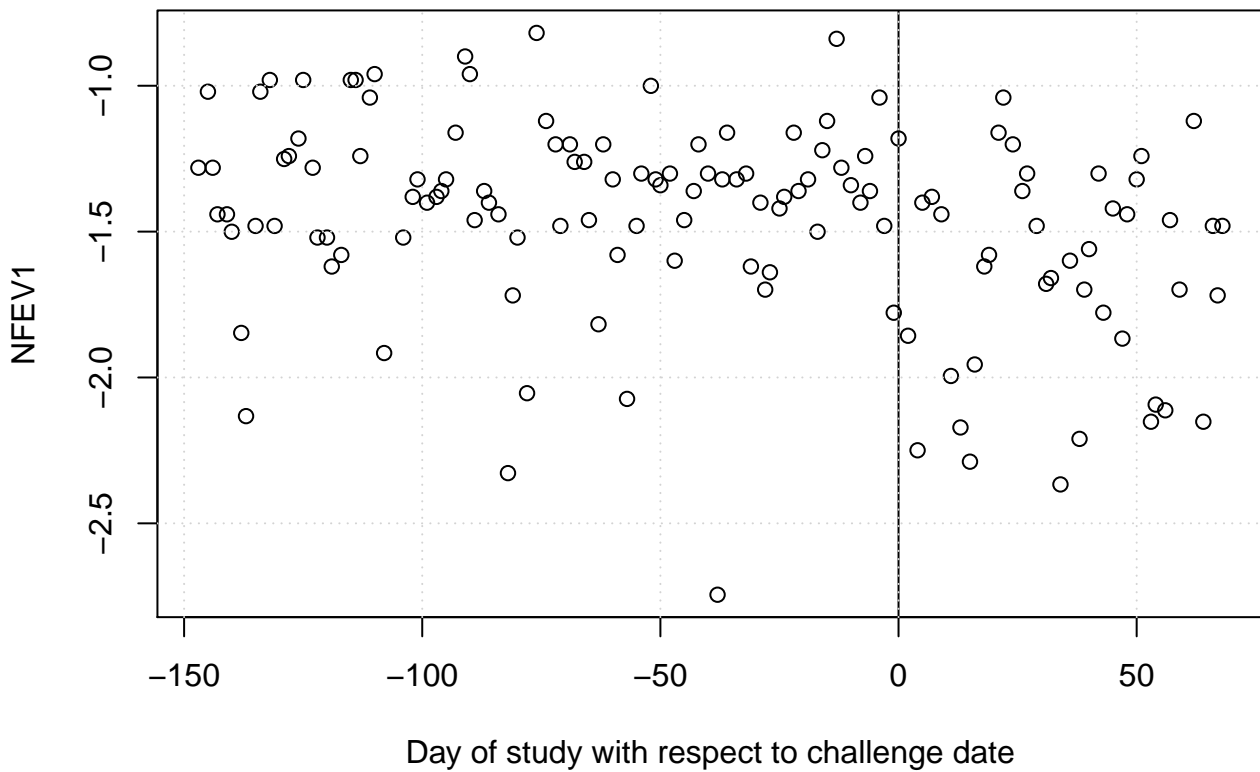

# P14H

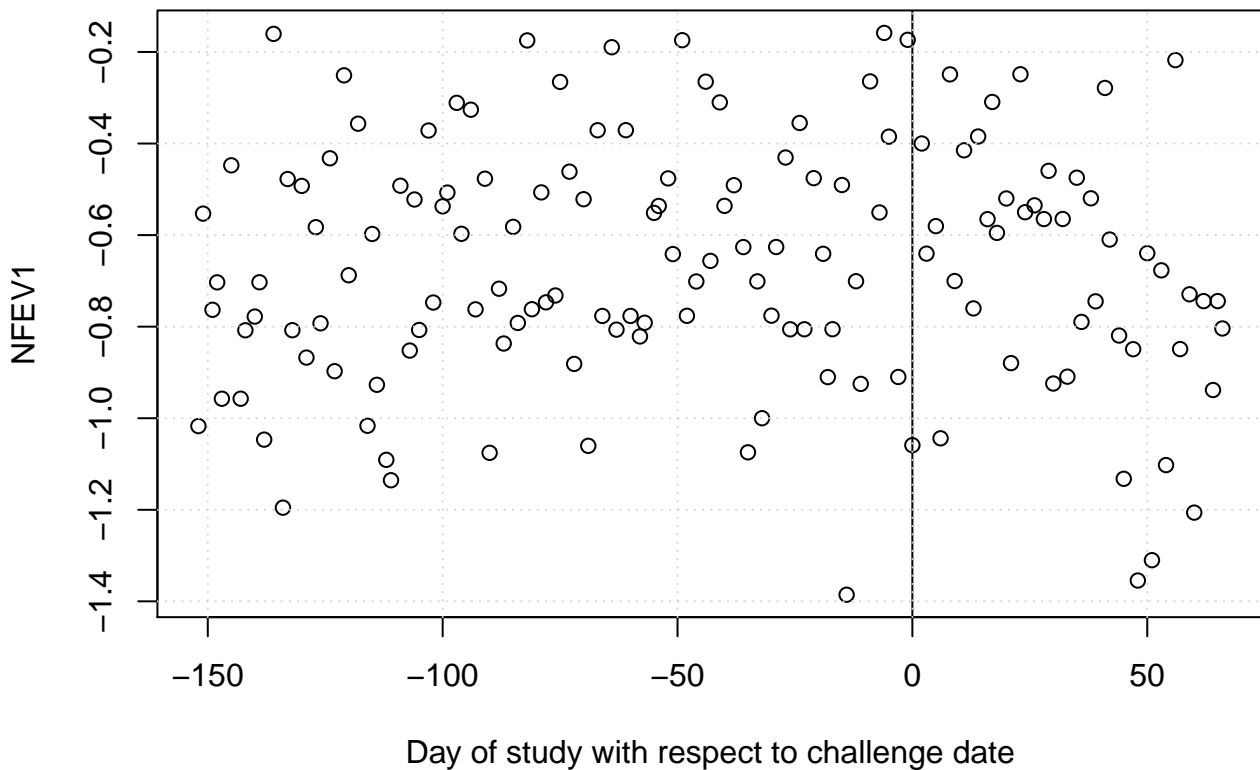

# P15H

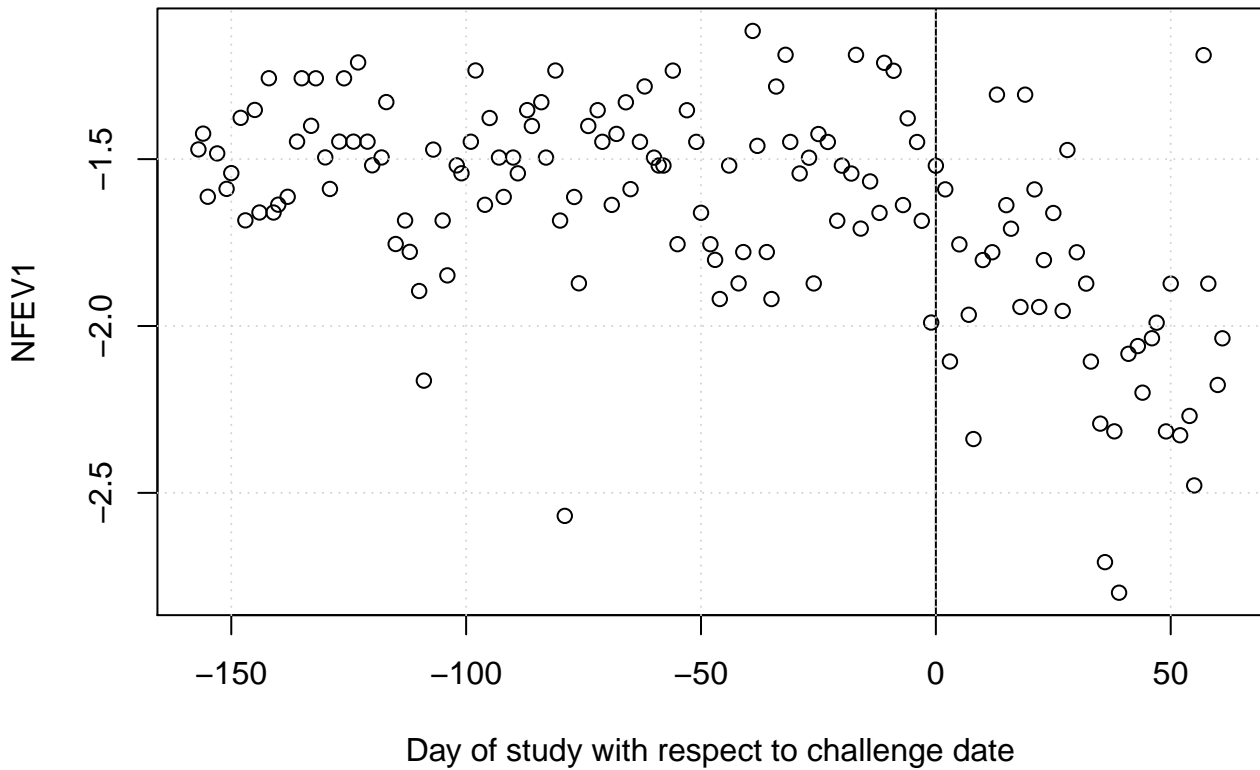



# P01A

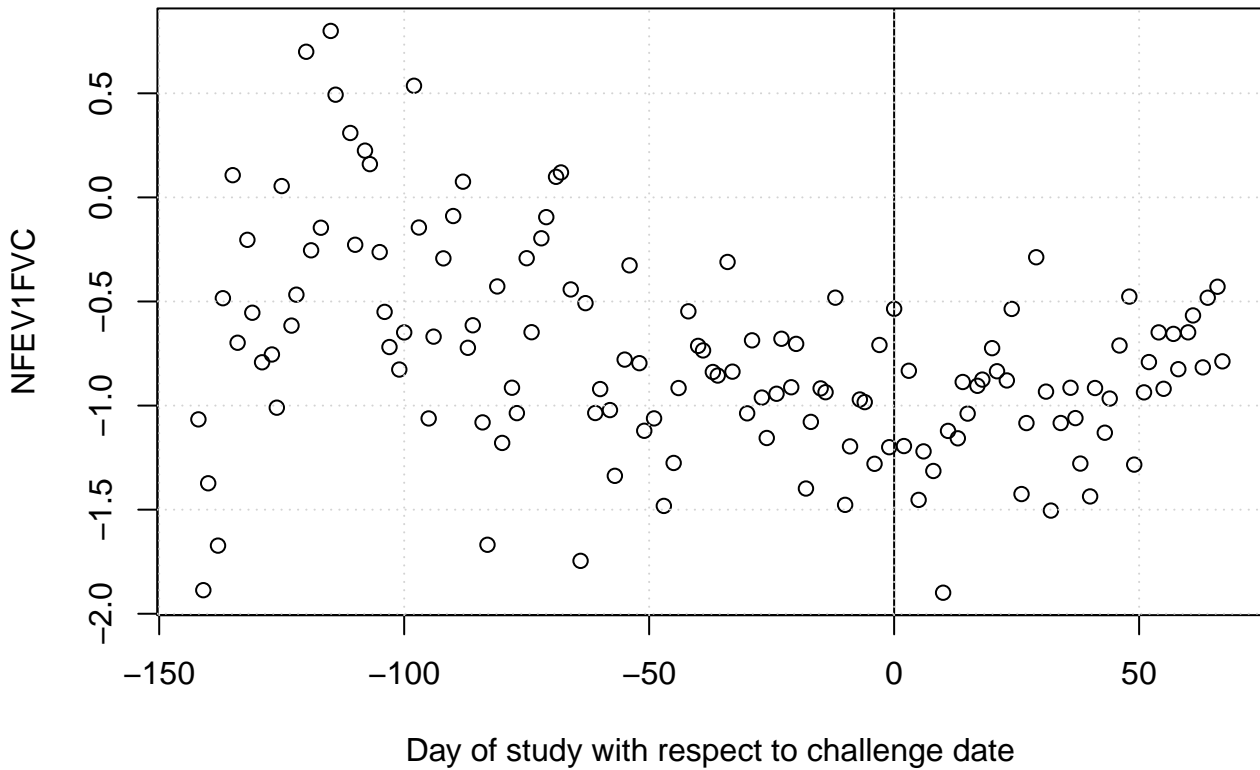

## P02A

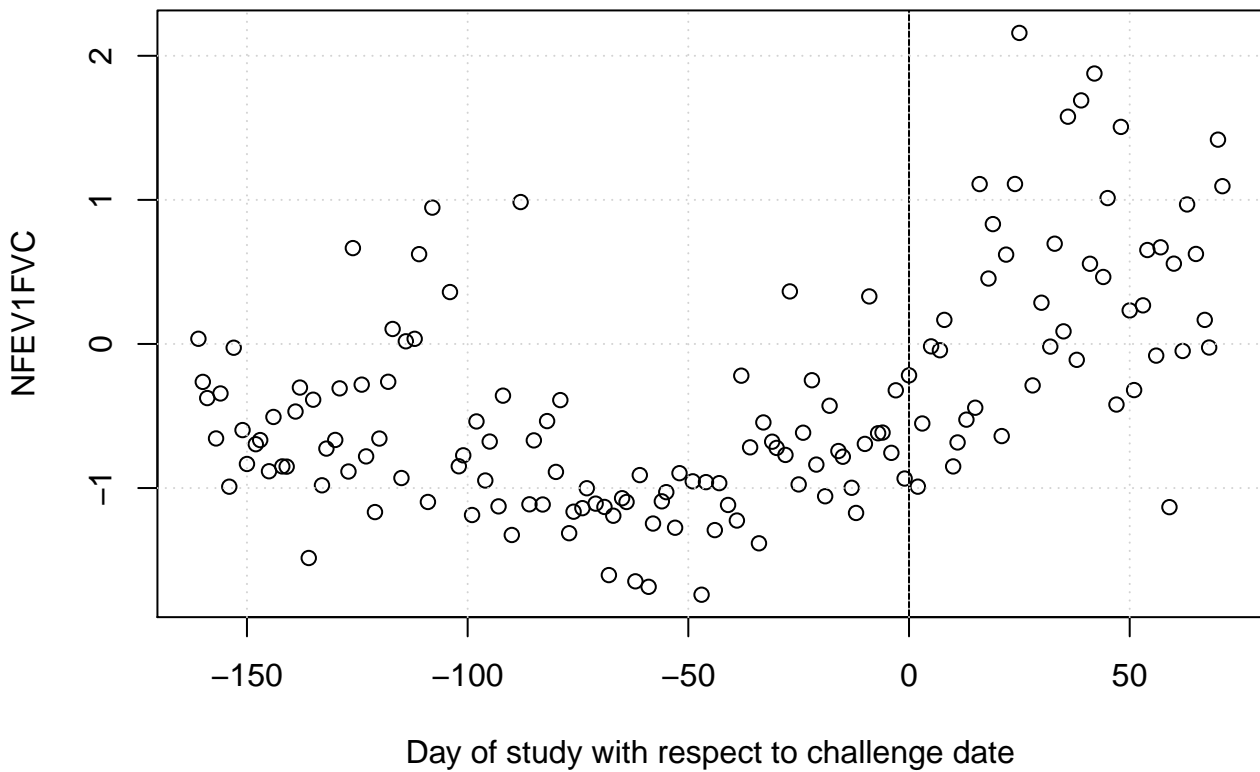

**P04A**

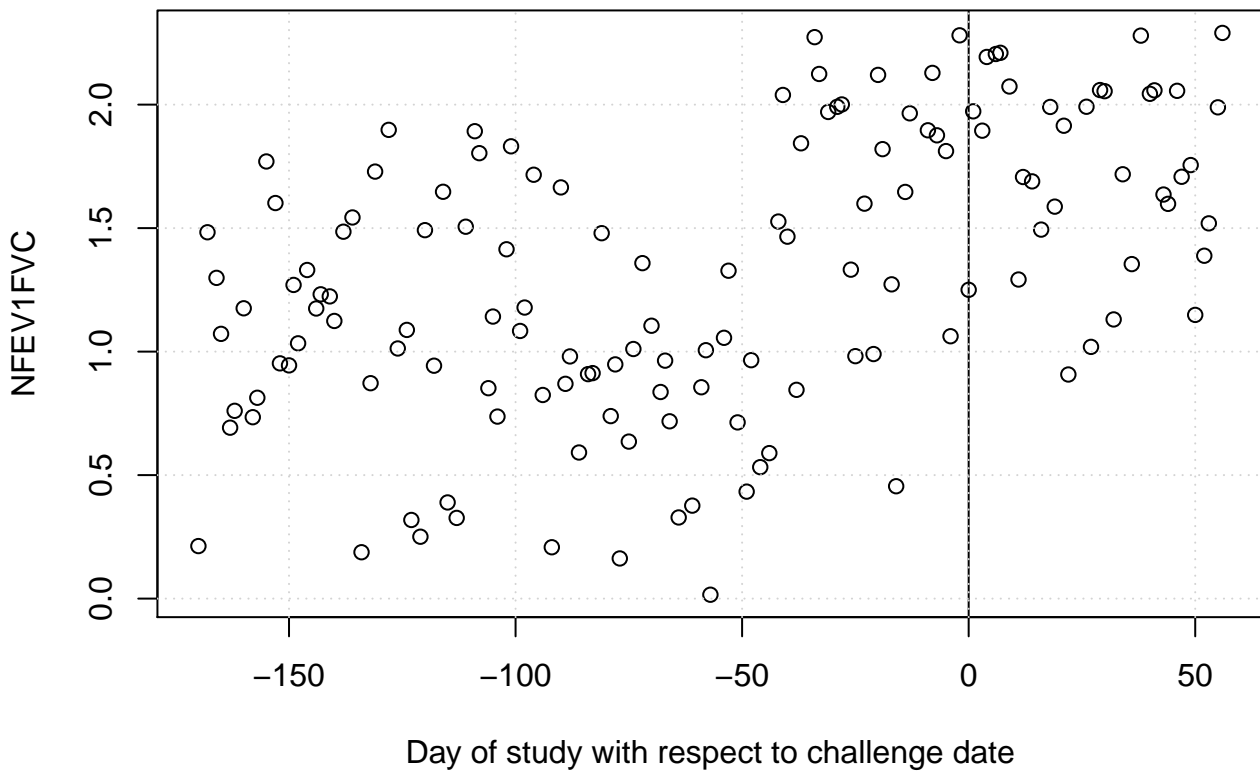

**P05A**

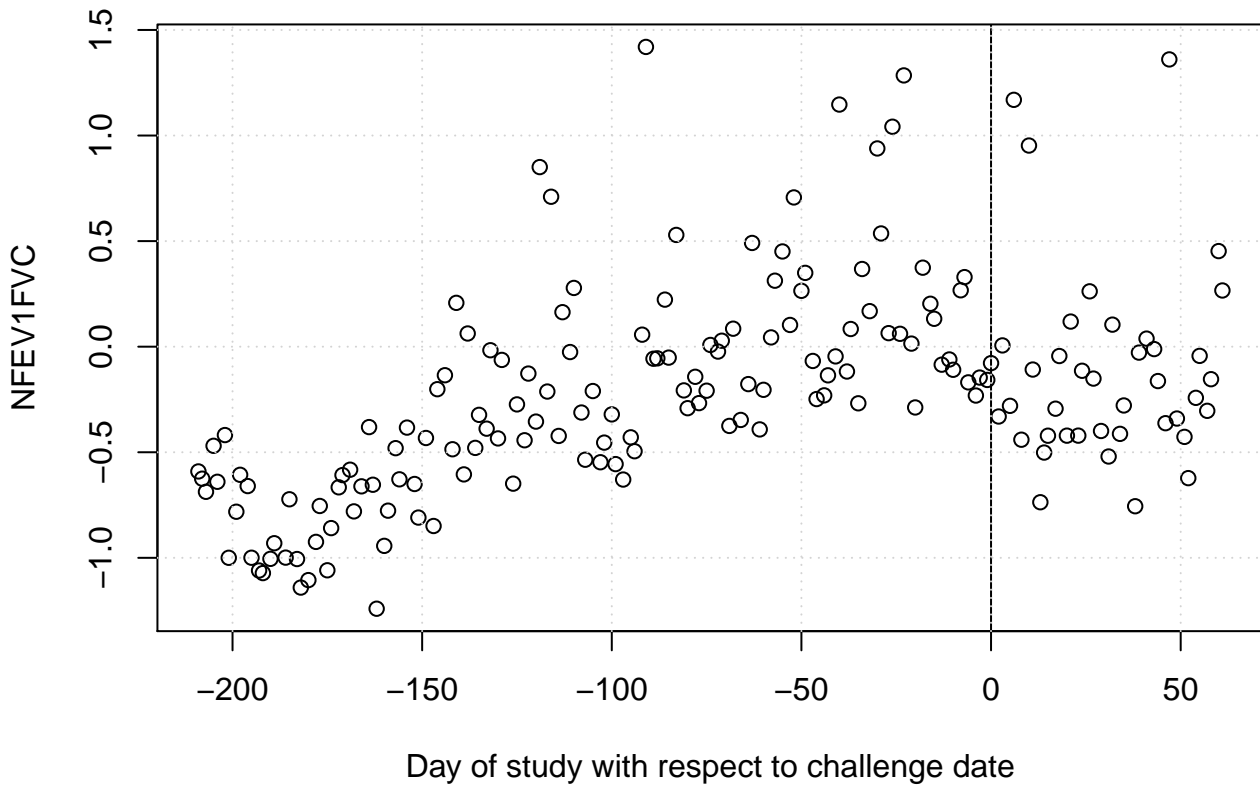

# P06A

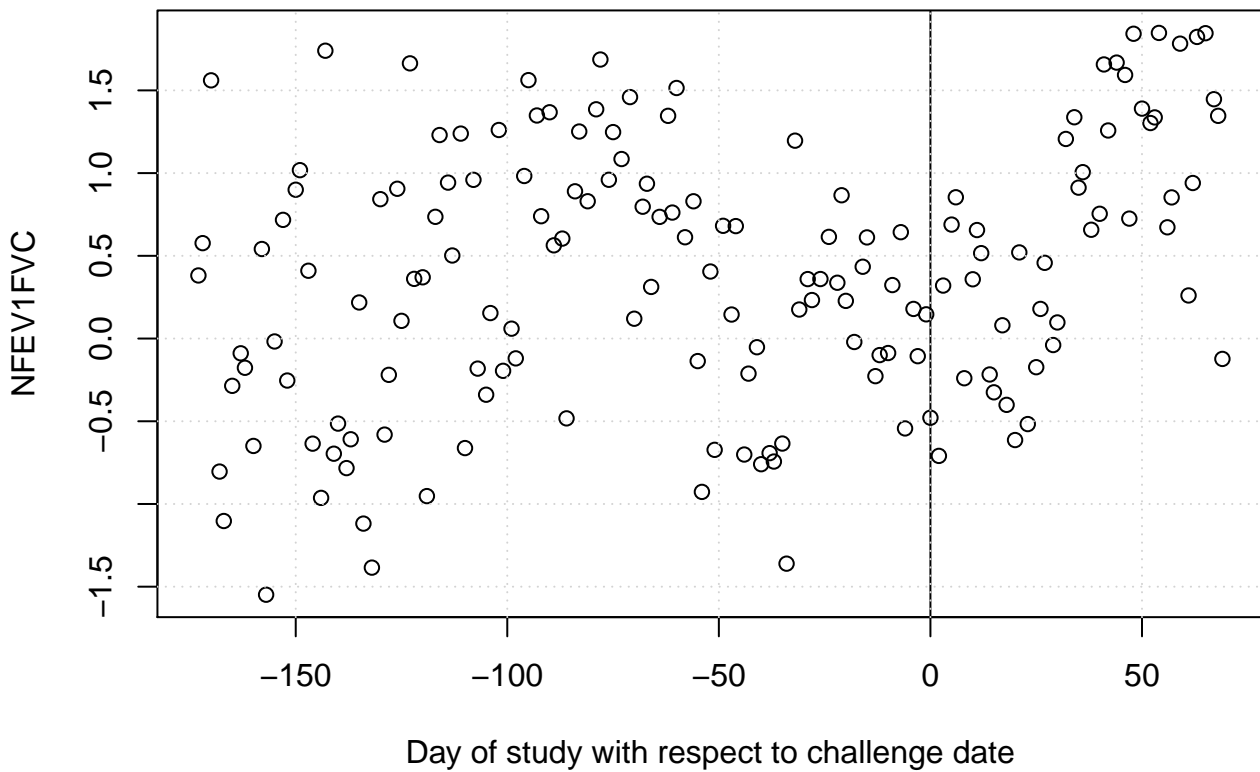

**P07A**

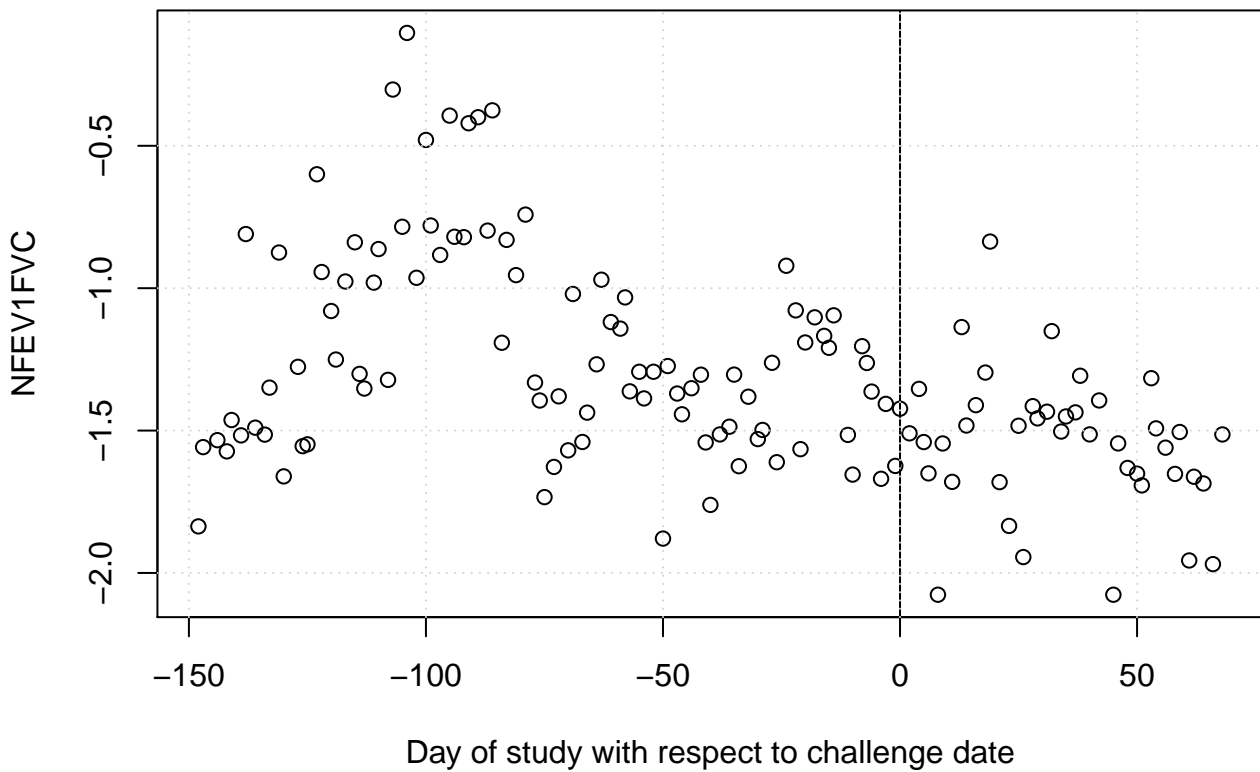

**P08A**

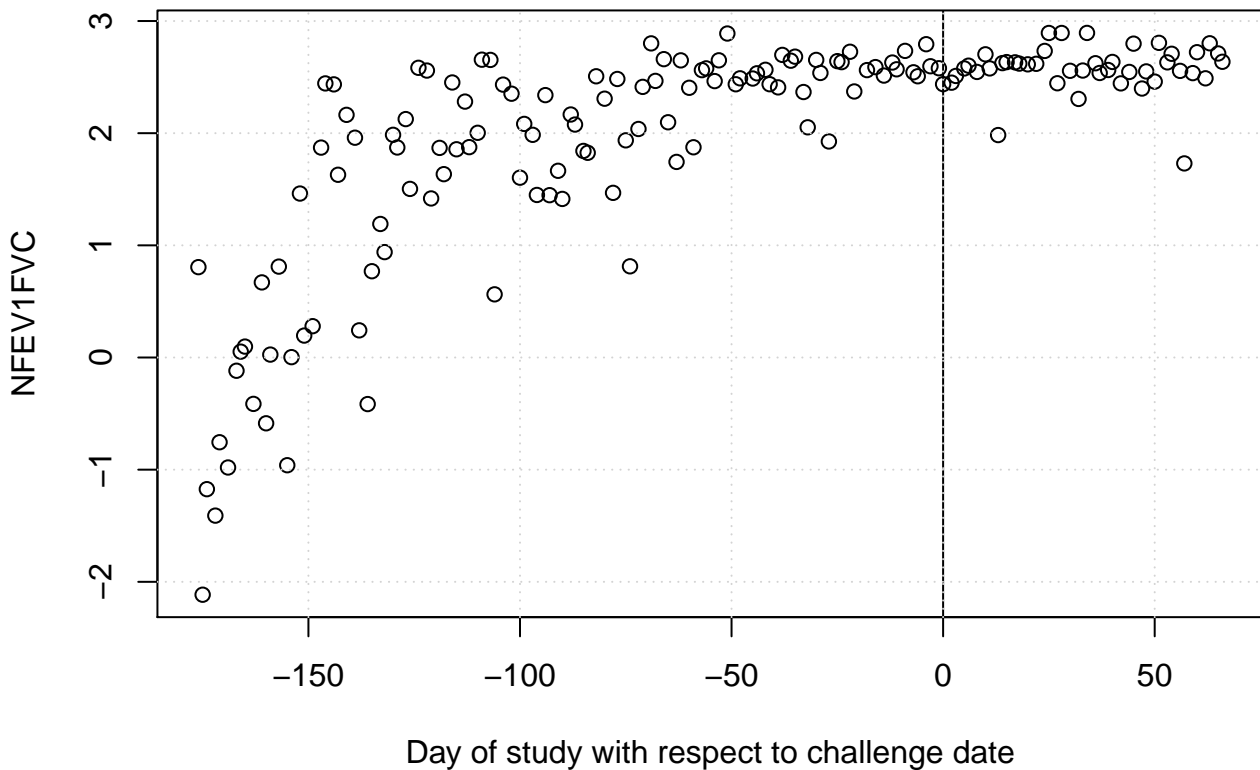

# P09A

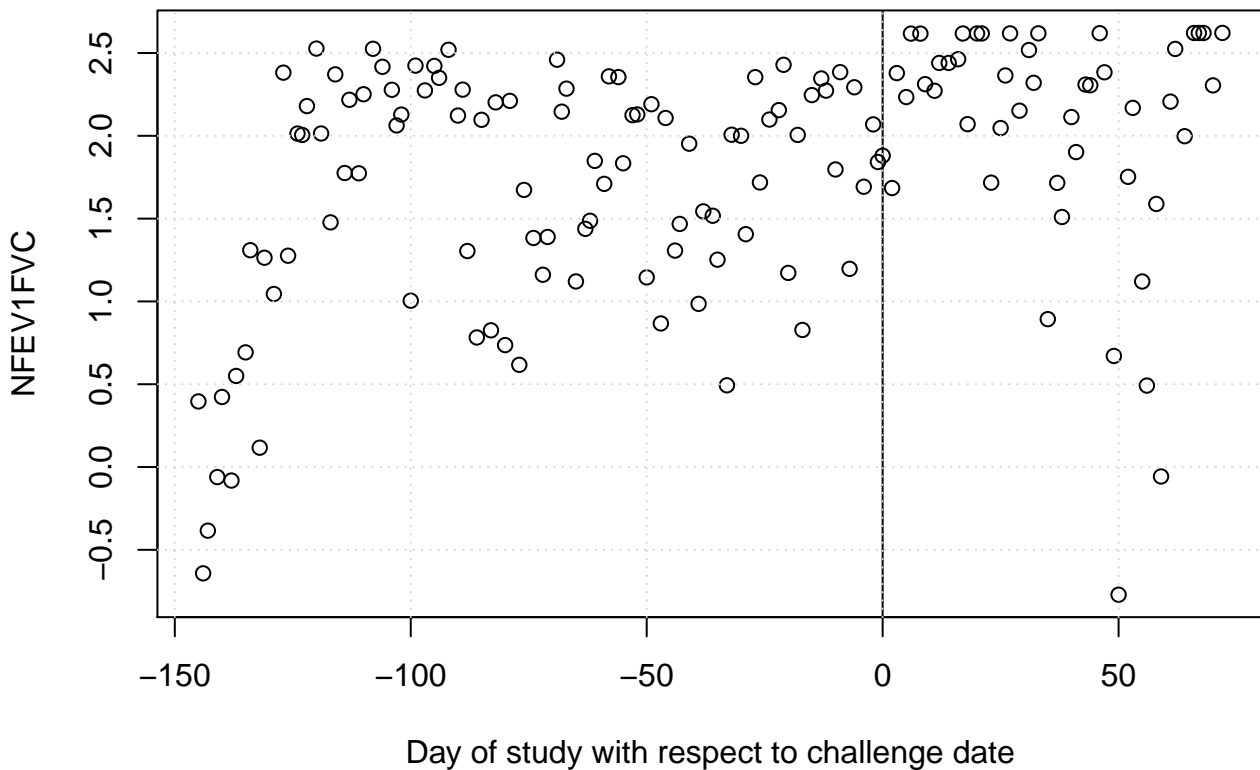



# P10A

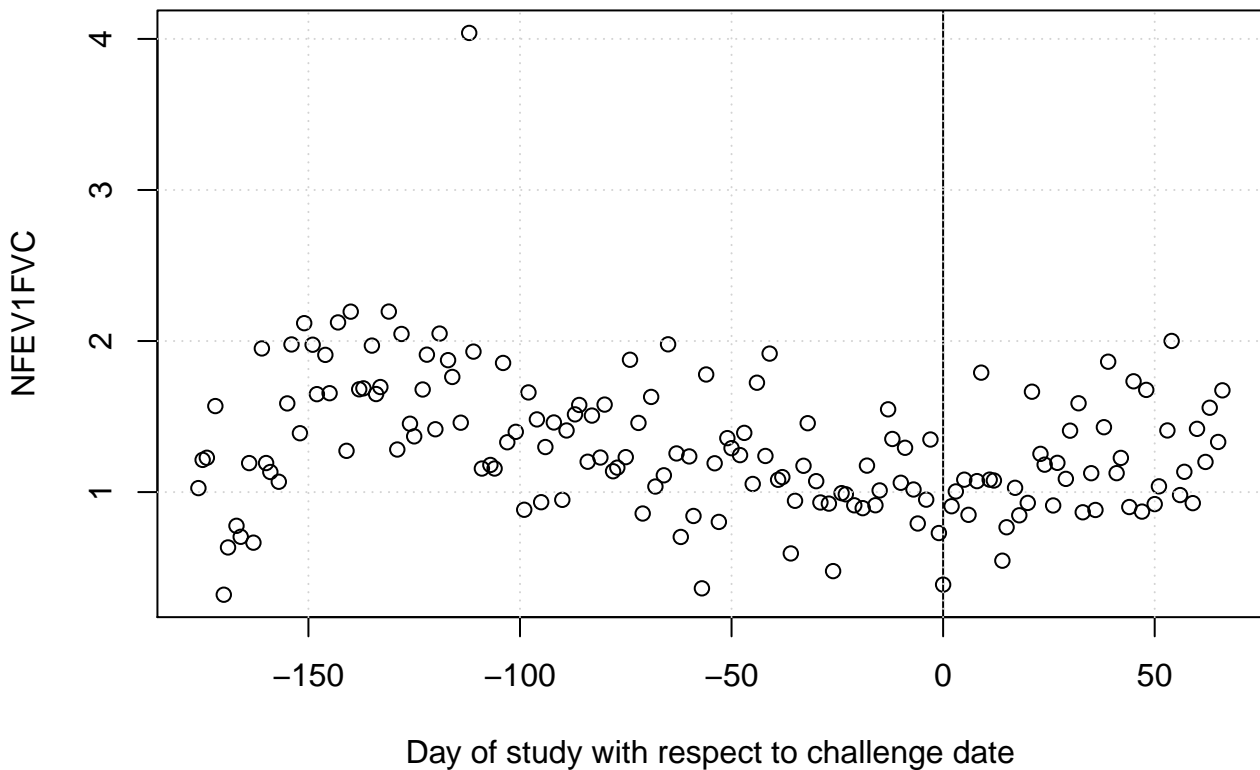

# P11A

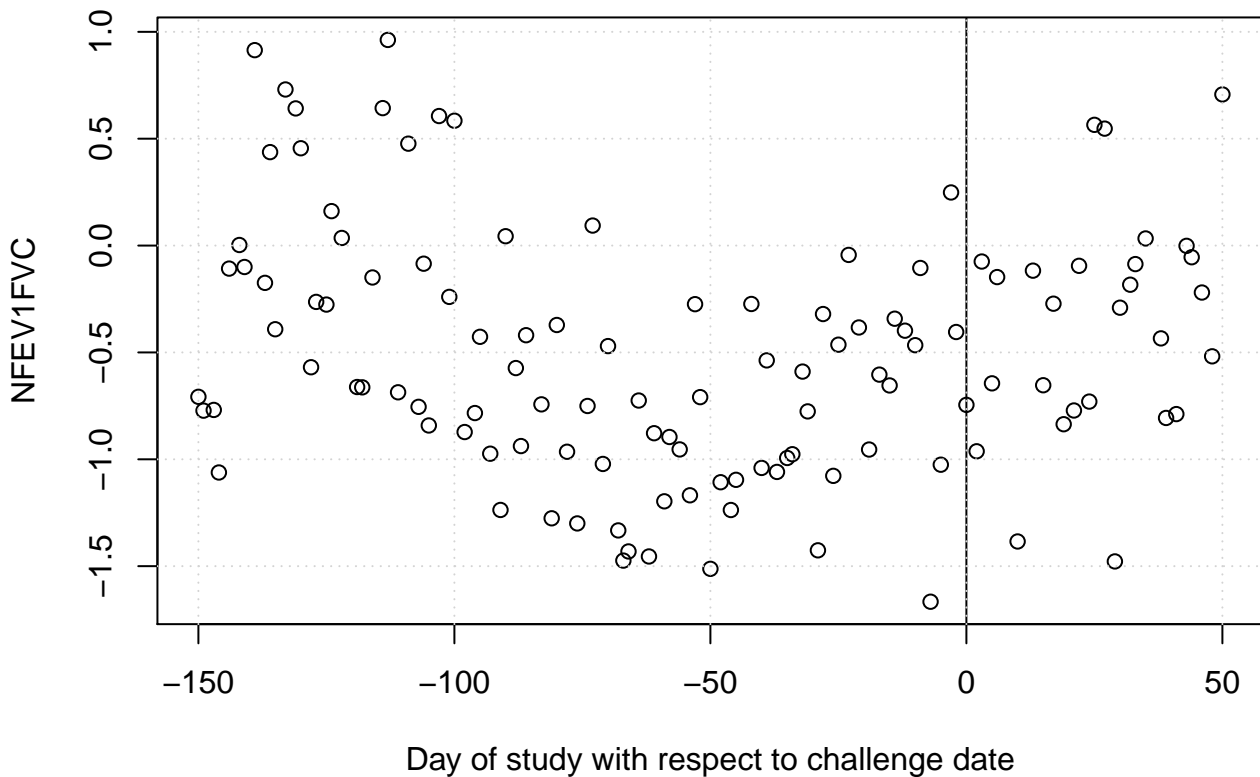

## P12A

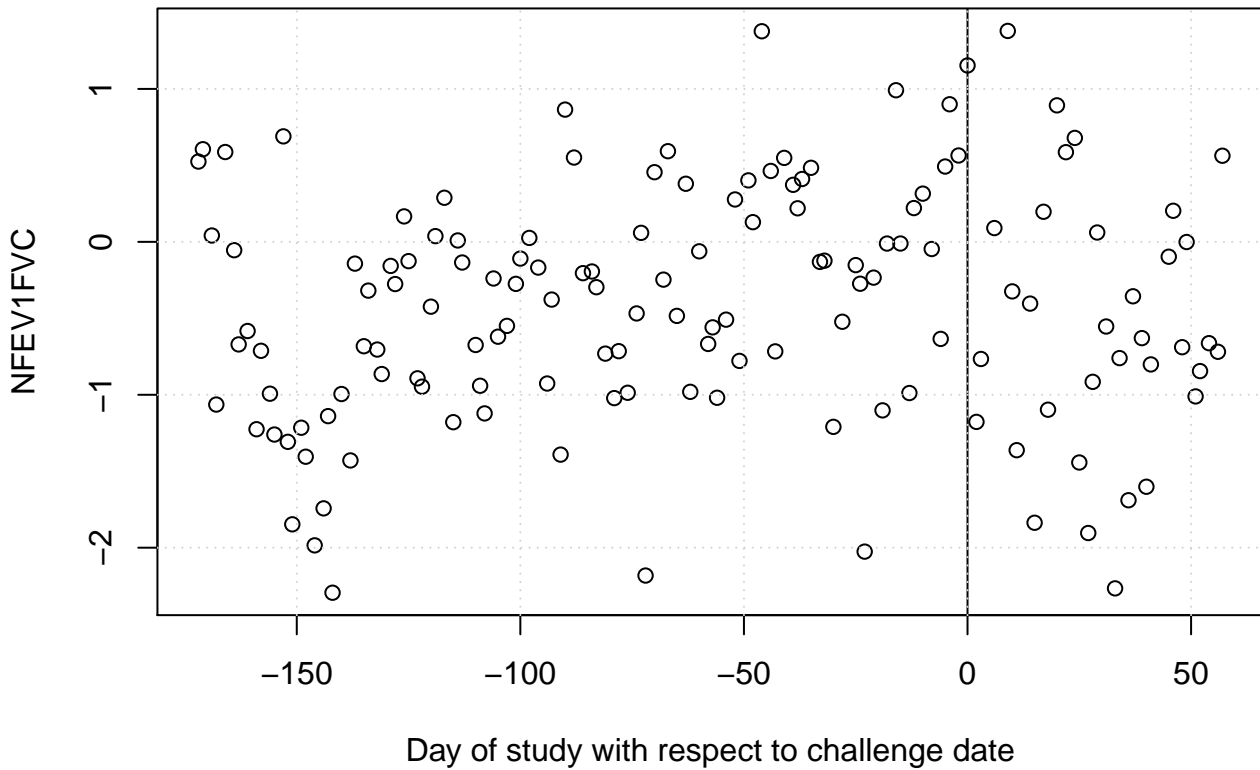

# P13A

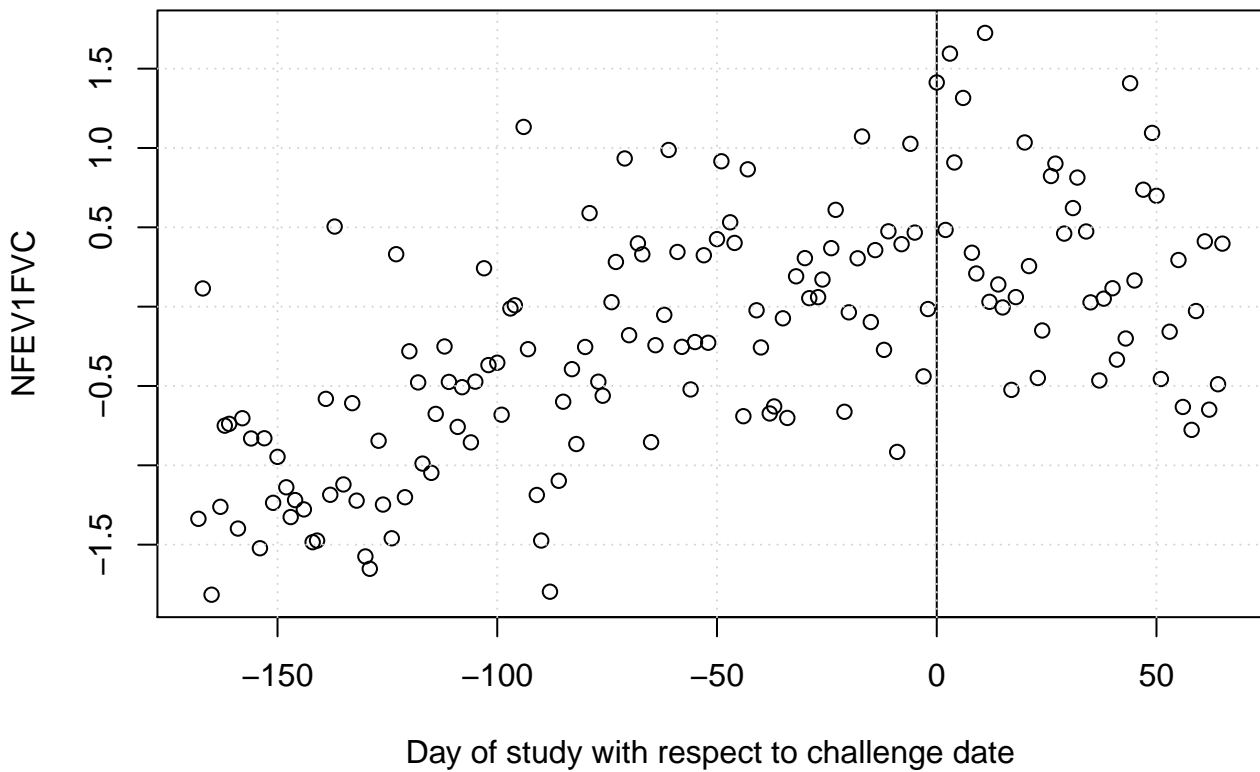

**P01H**

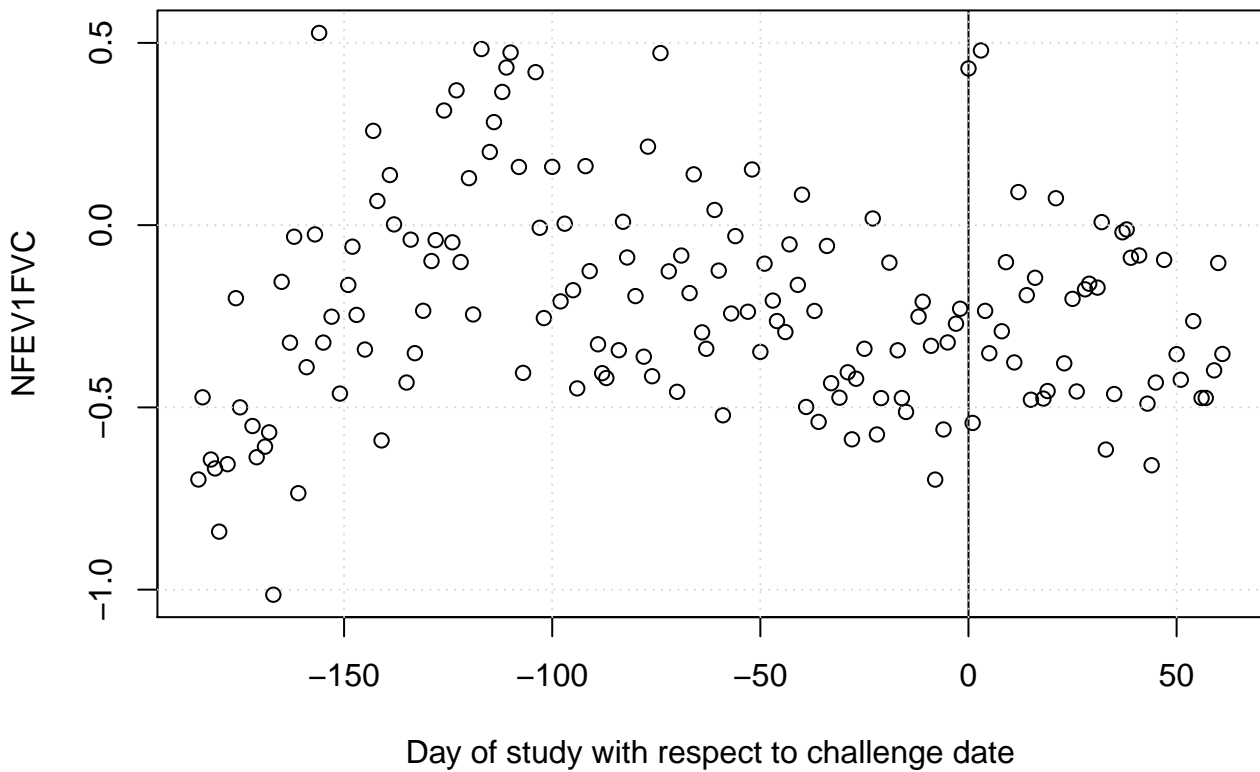

# P03H

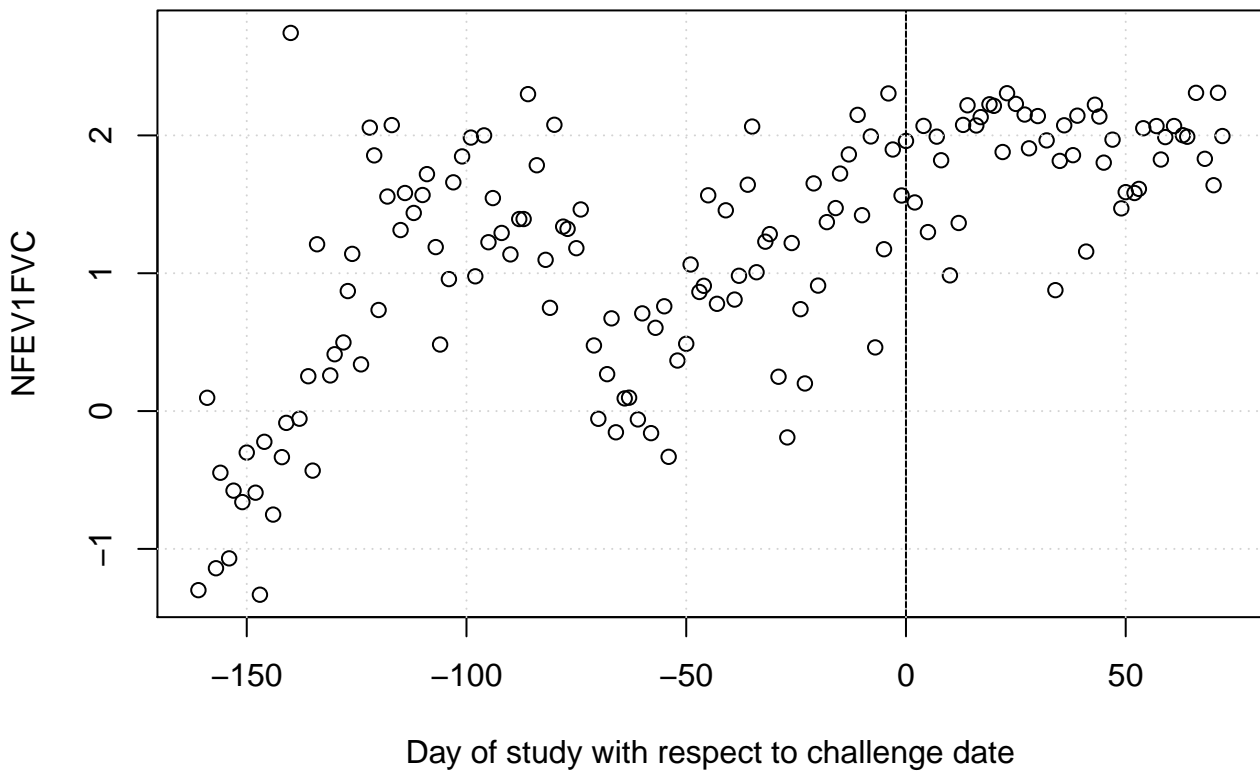

# P05H

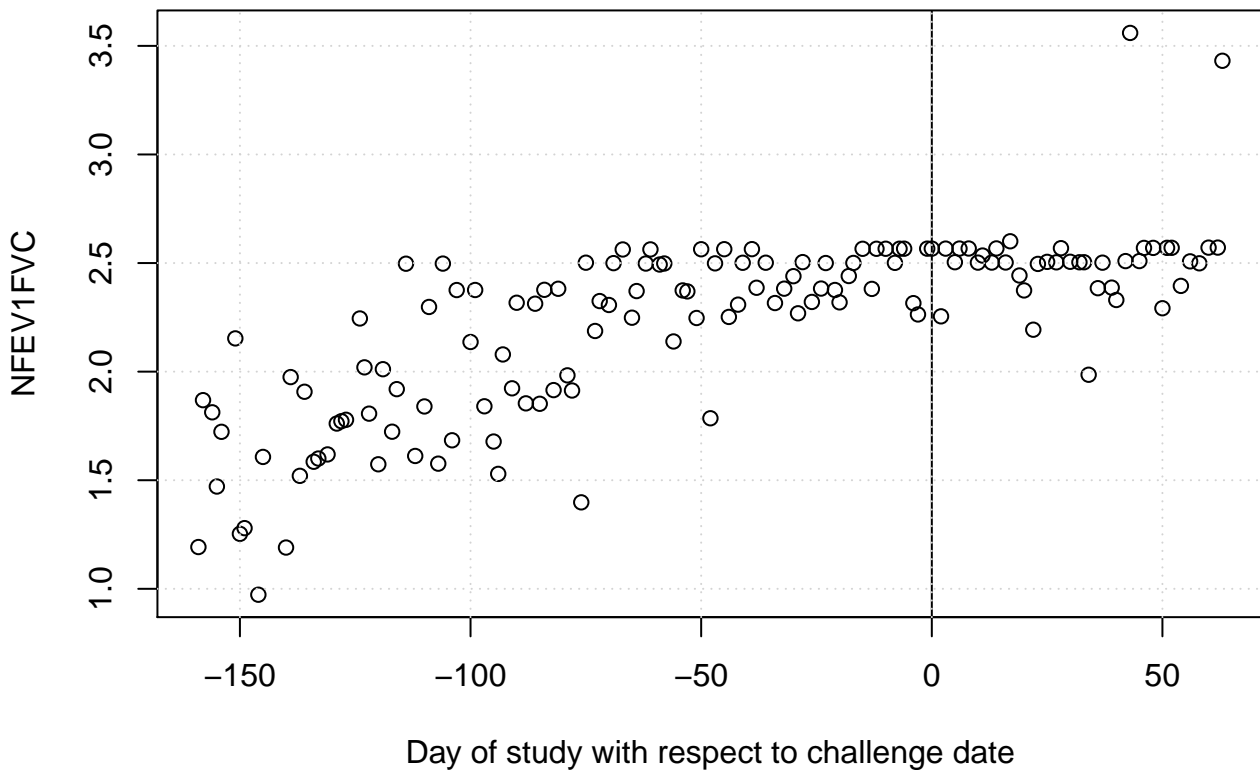

# P06H

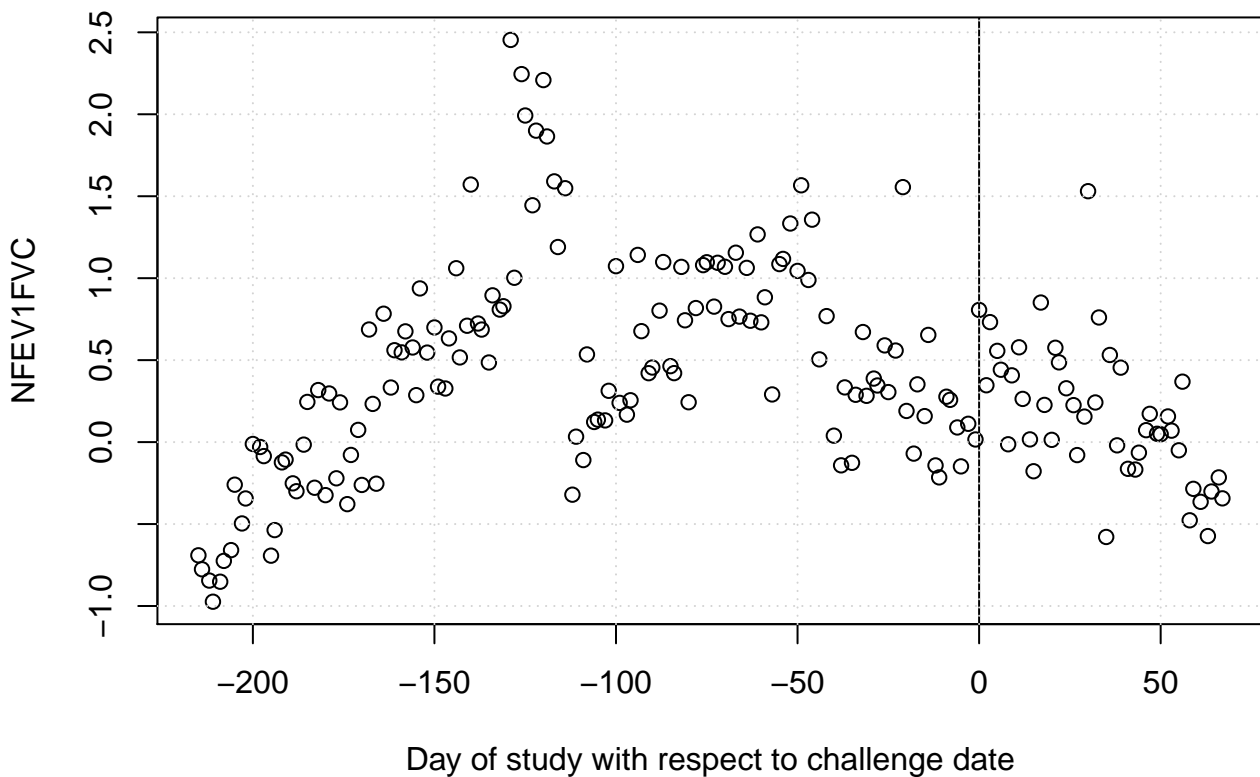



**P07H**

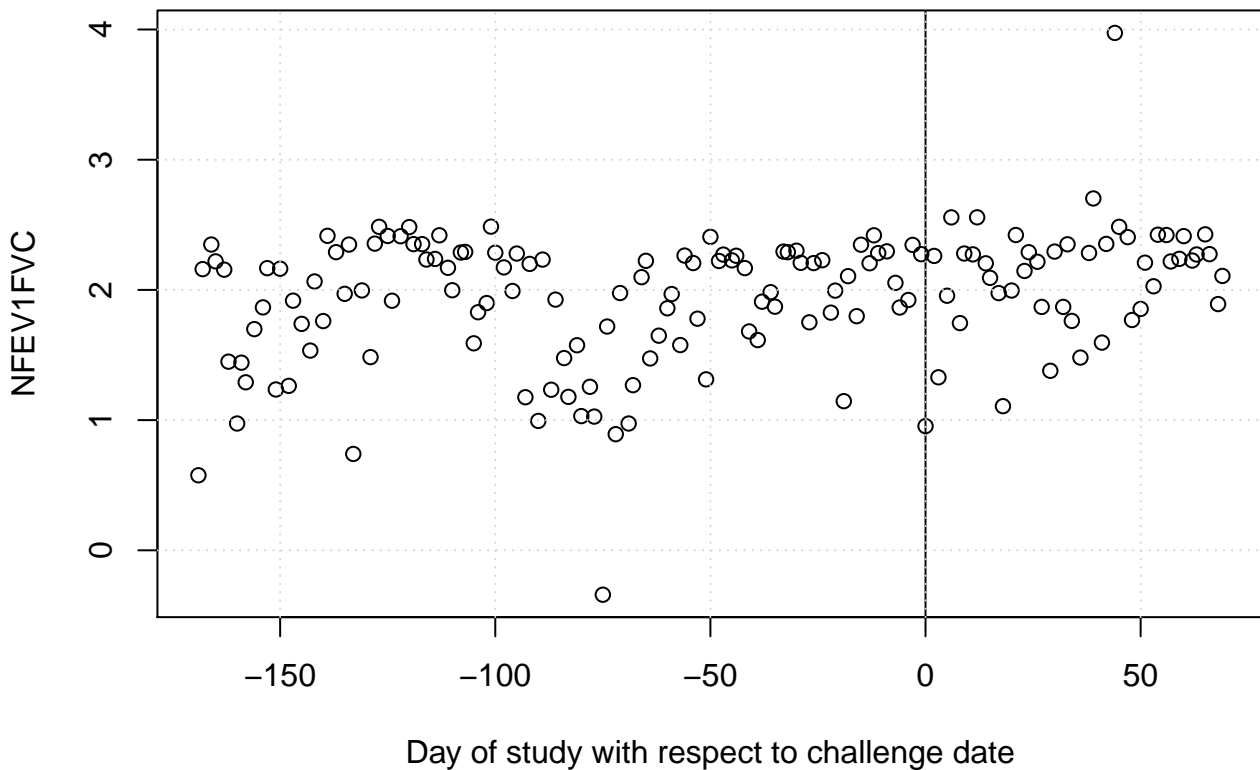

**P08H**

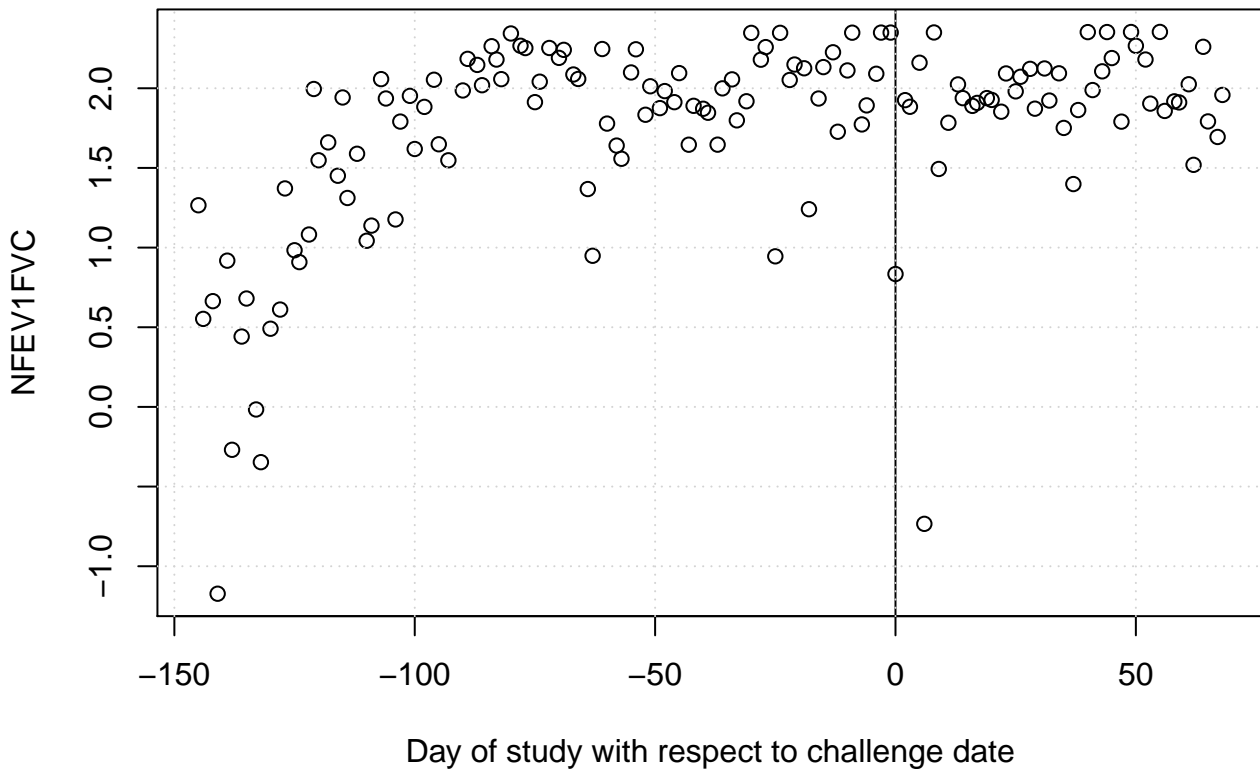

# P09H

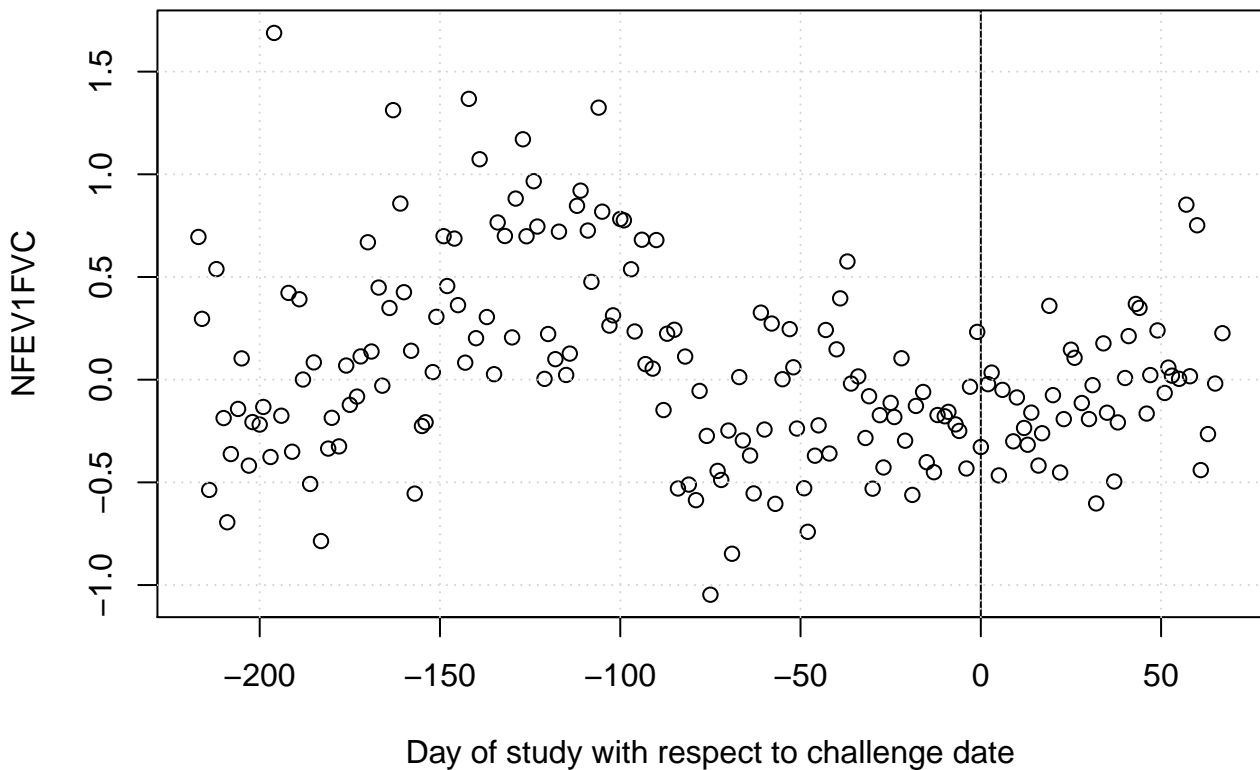

# P11H

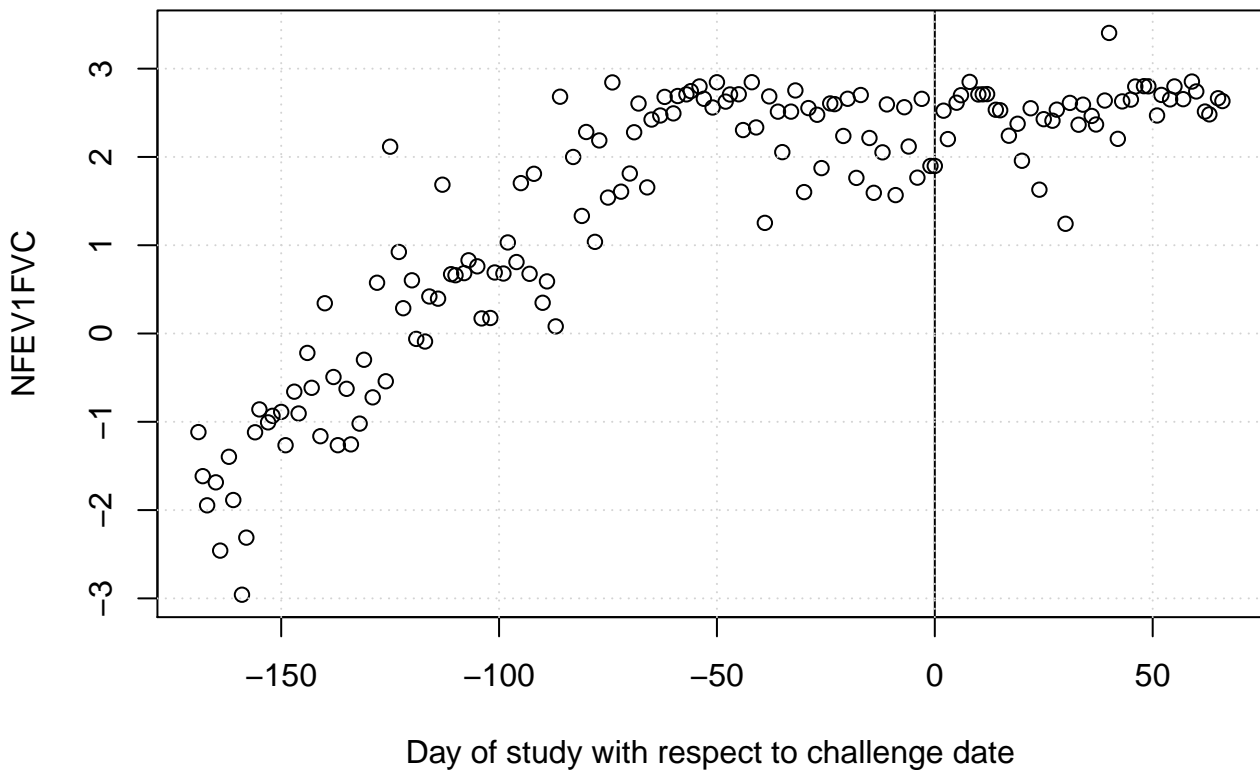

# P12H

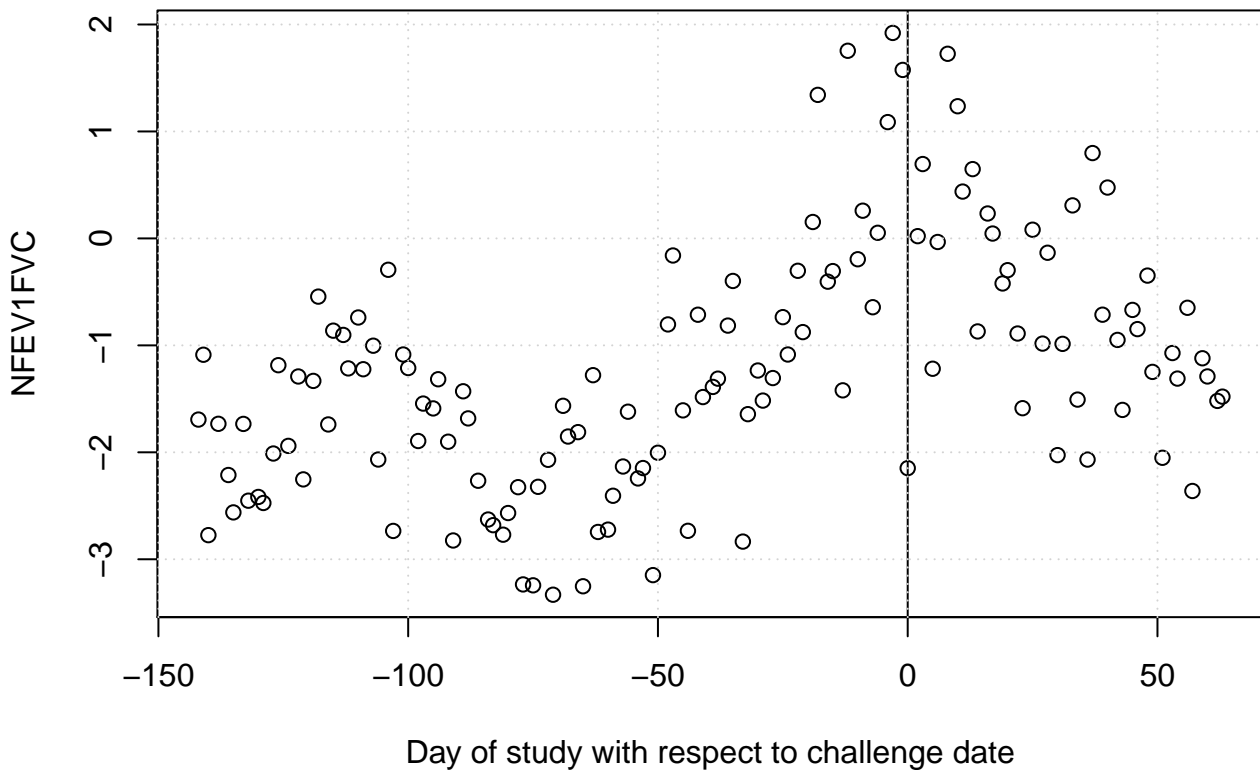

# P13H

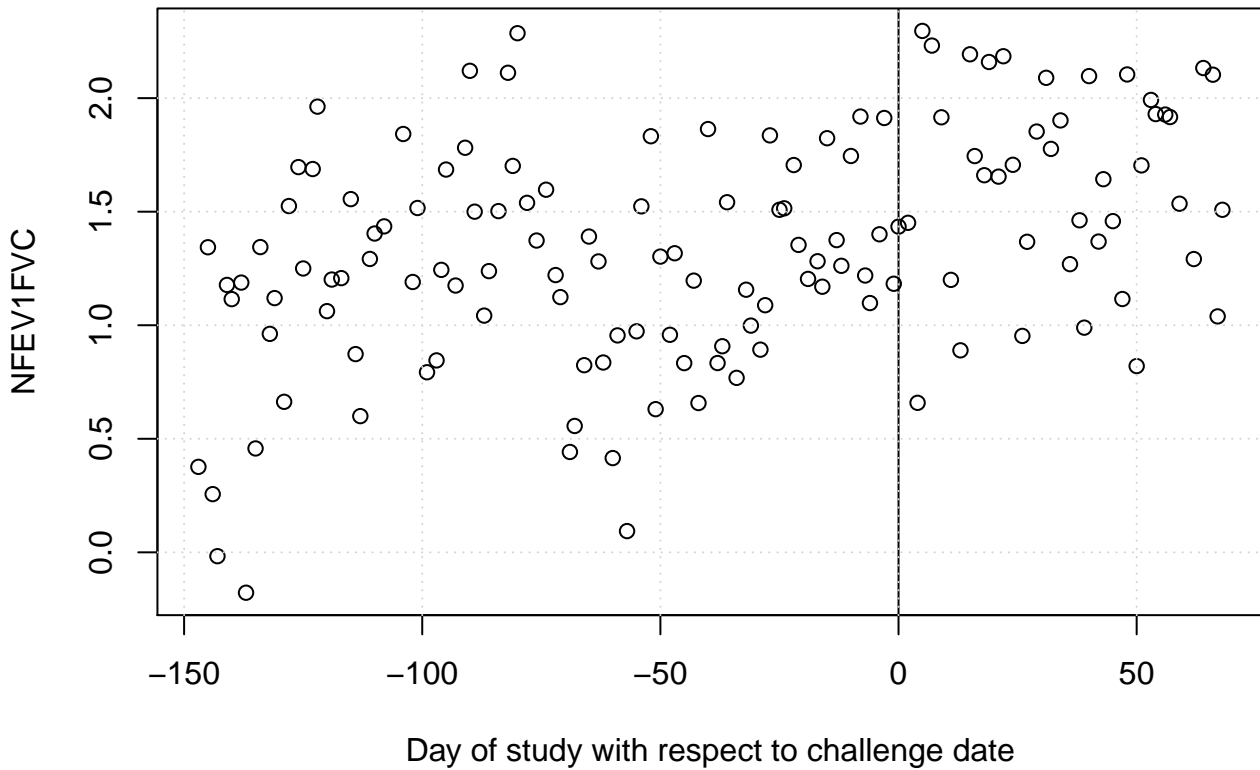

# P14H

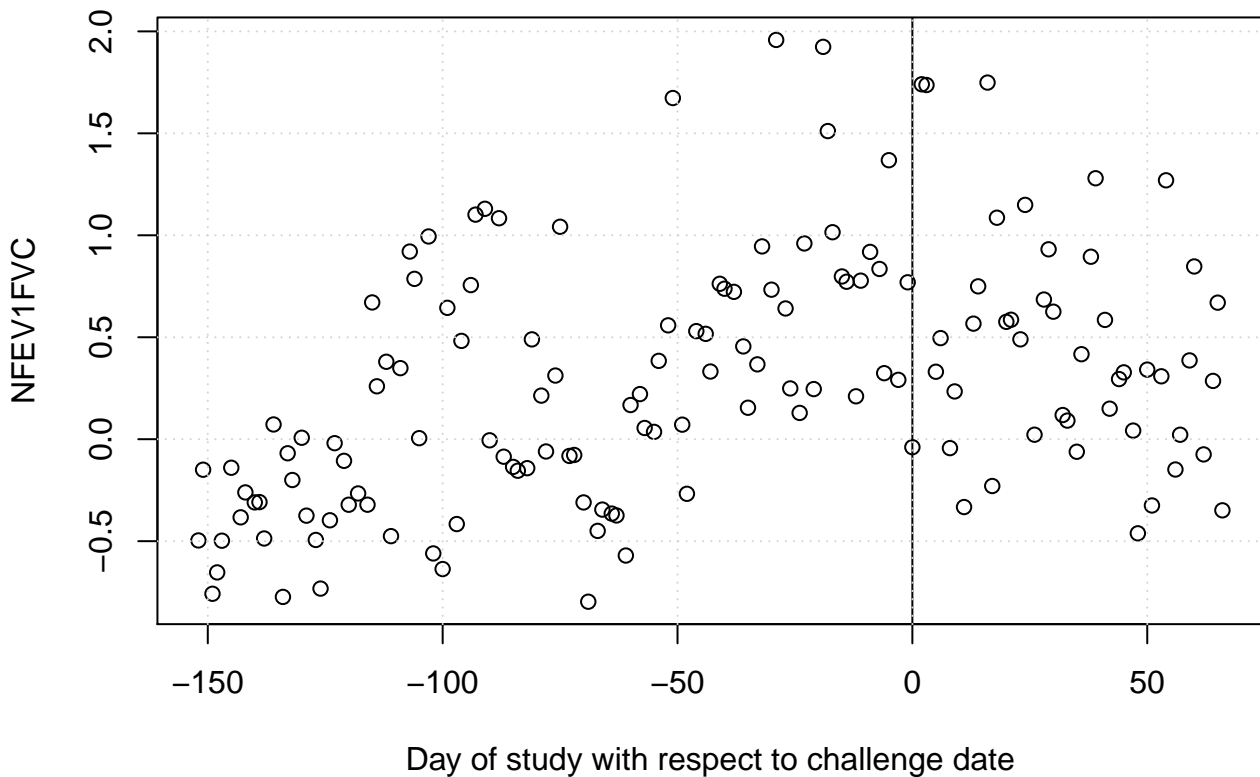

# P15H

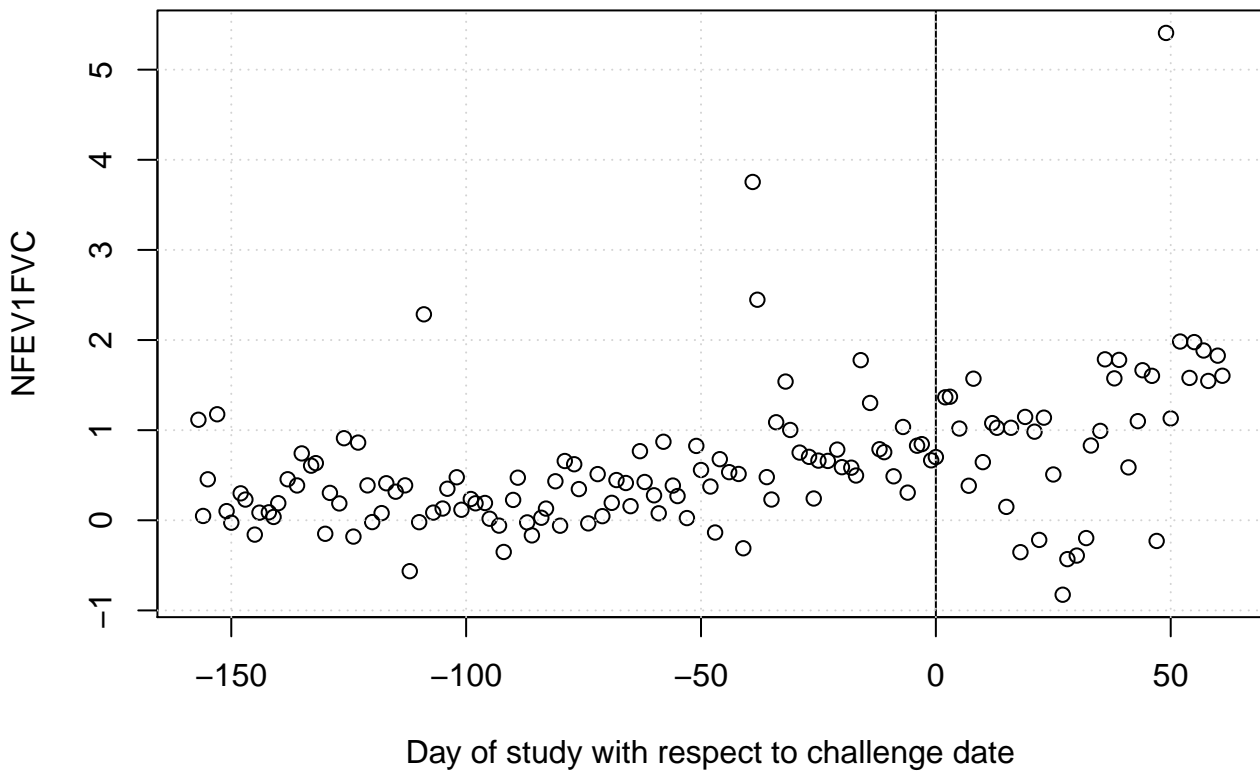



# P01A

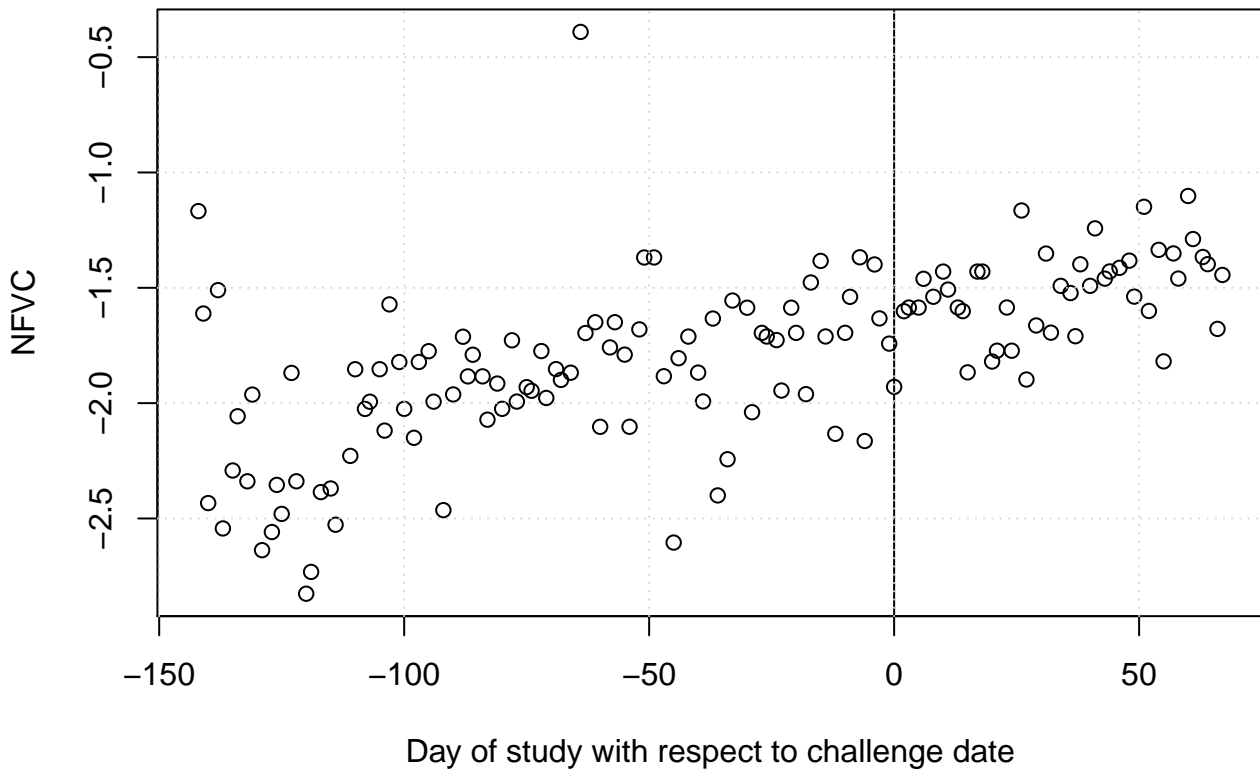

# P02A

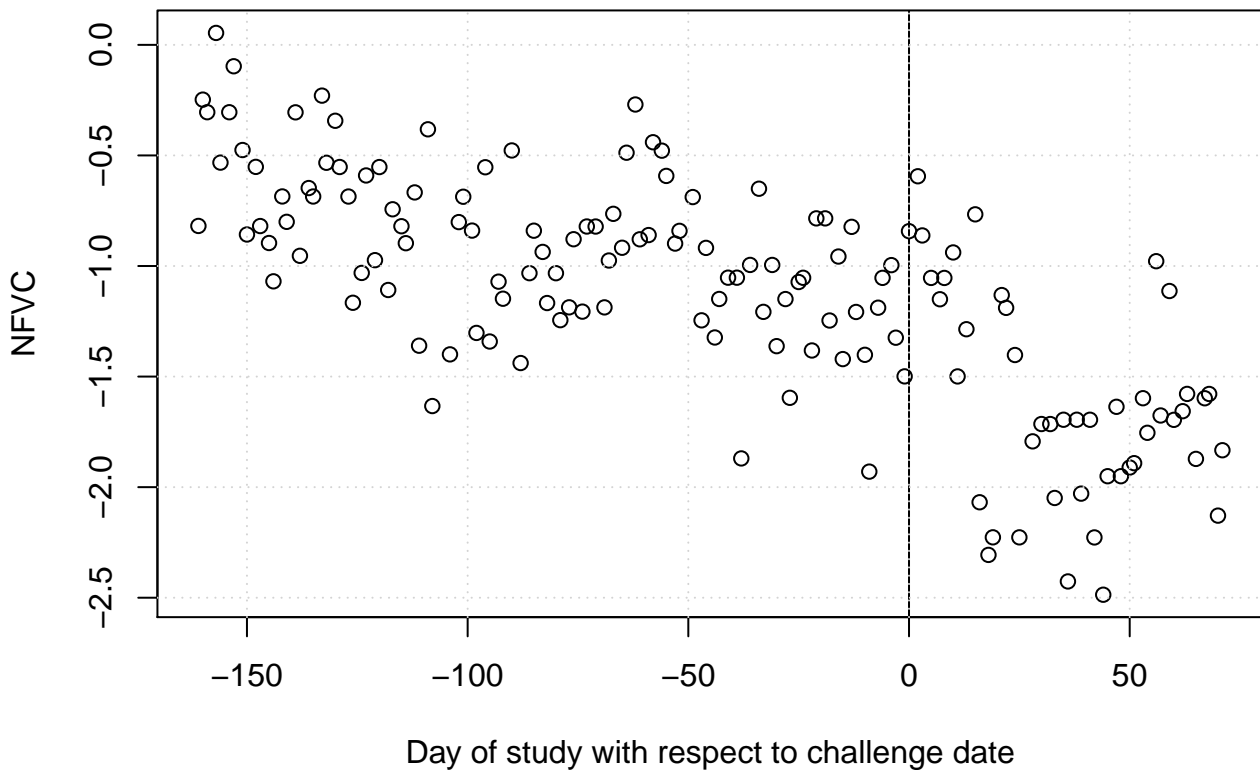

# P04A

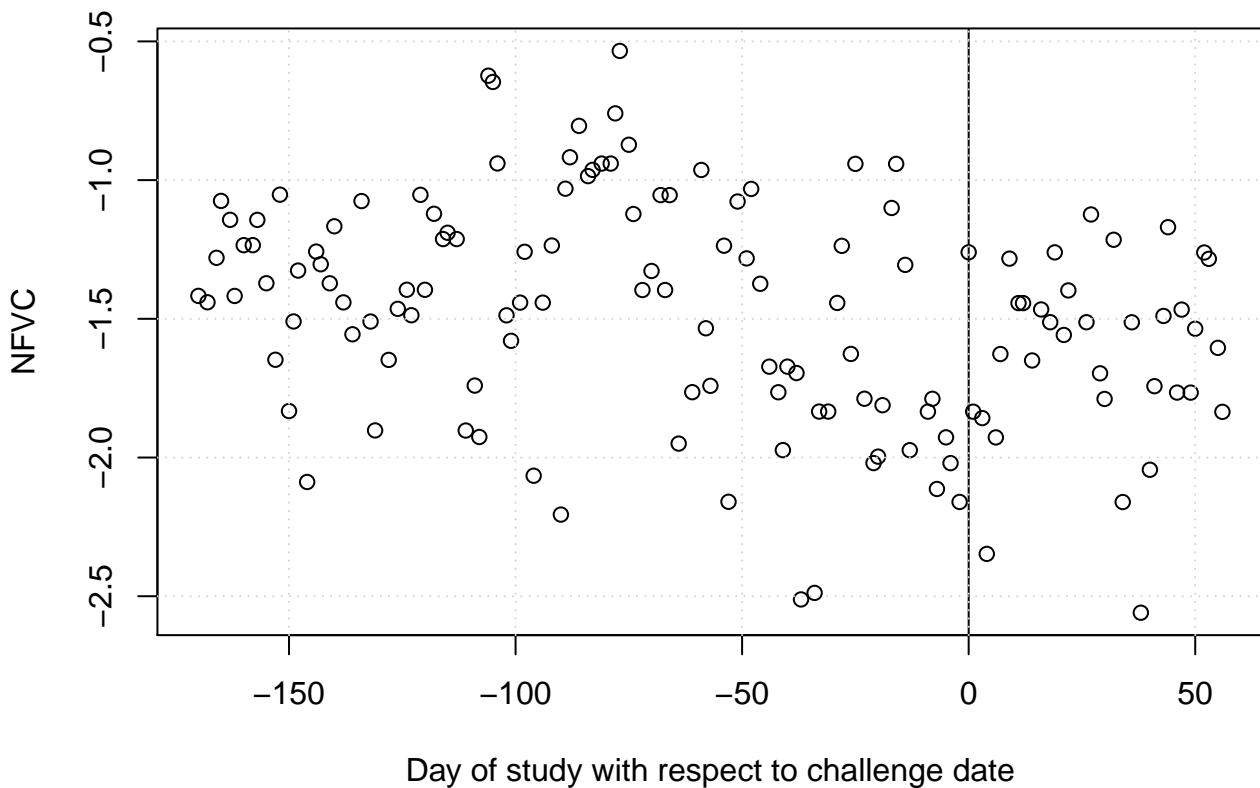

# P05A

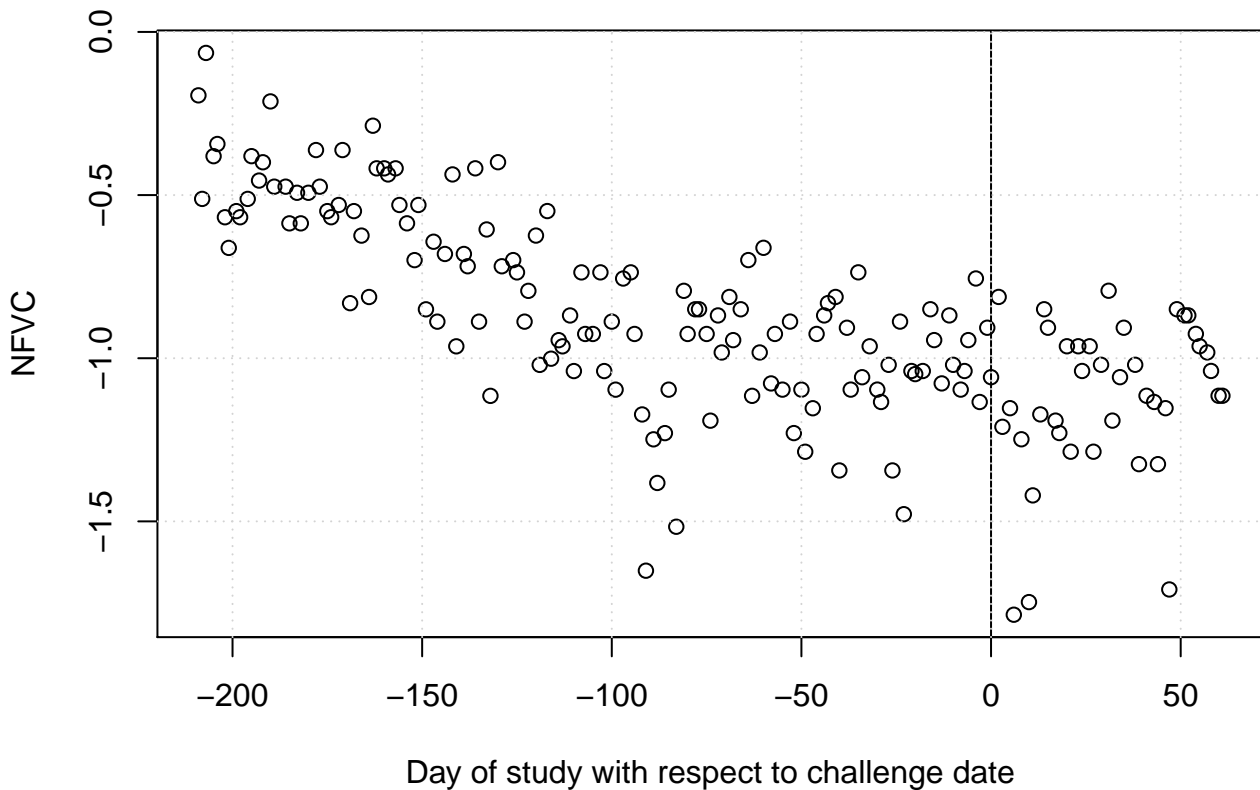

# P06A

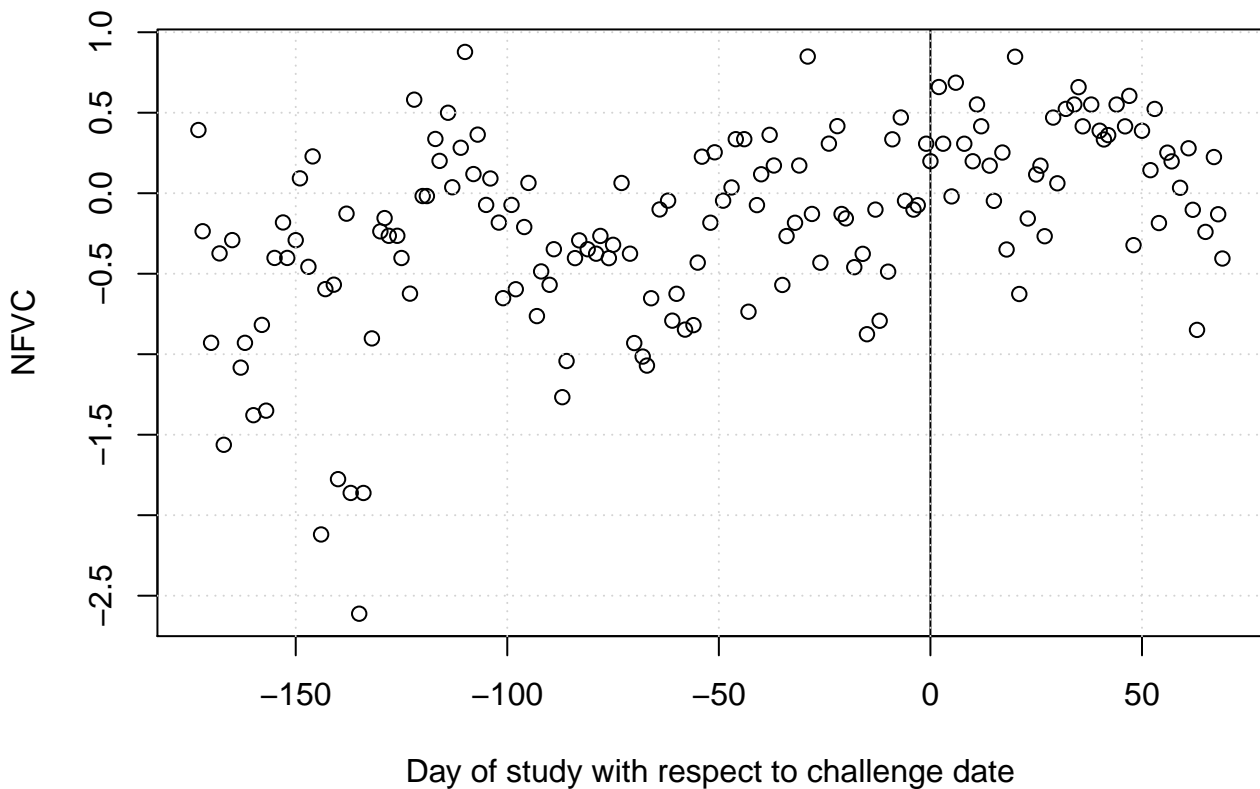

**P07A**

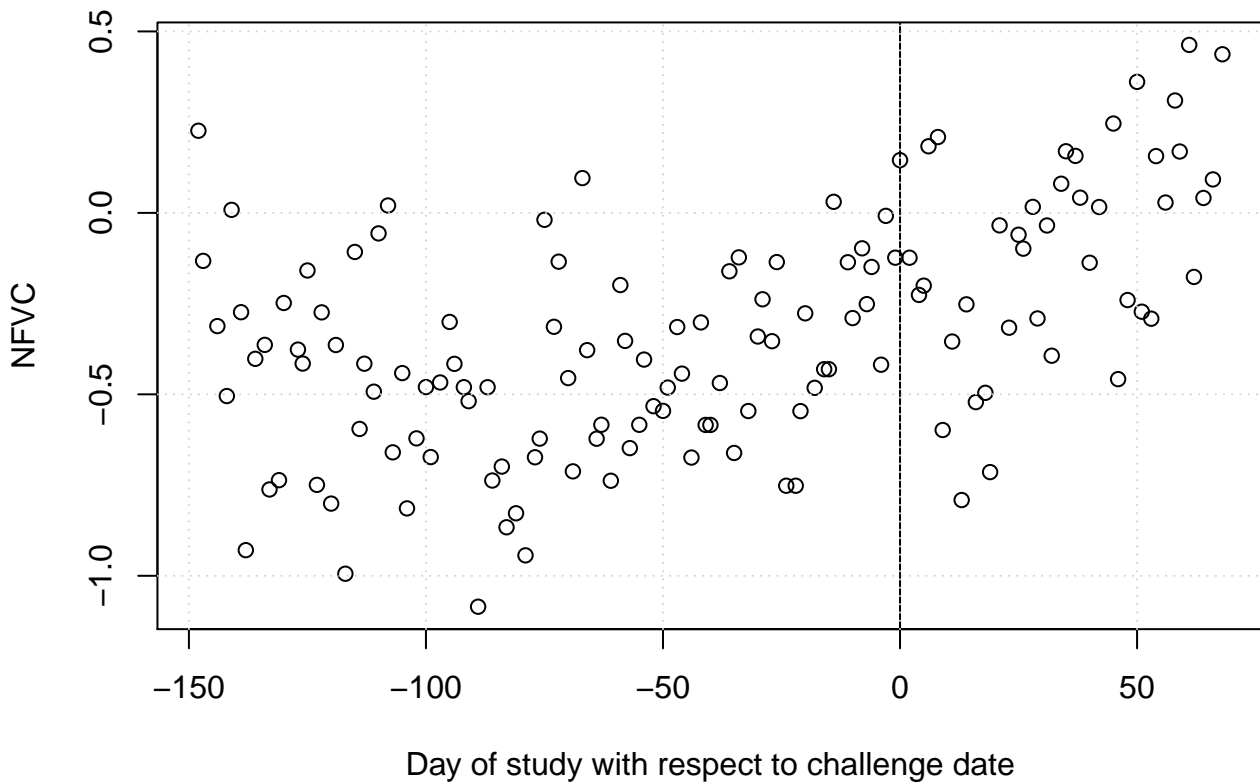

**P08A**

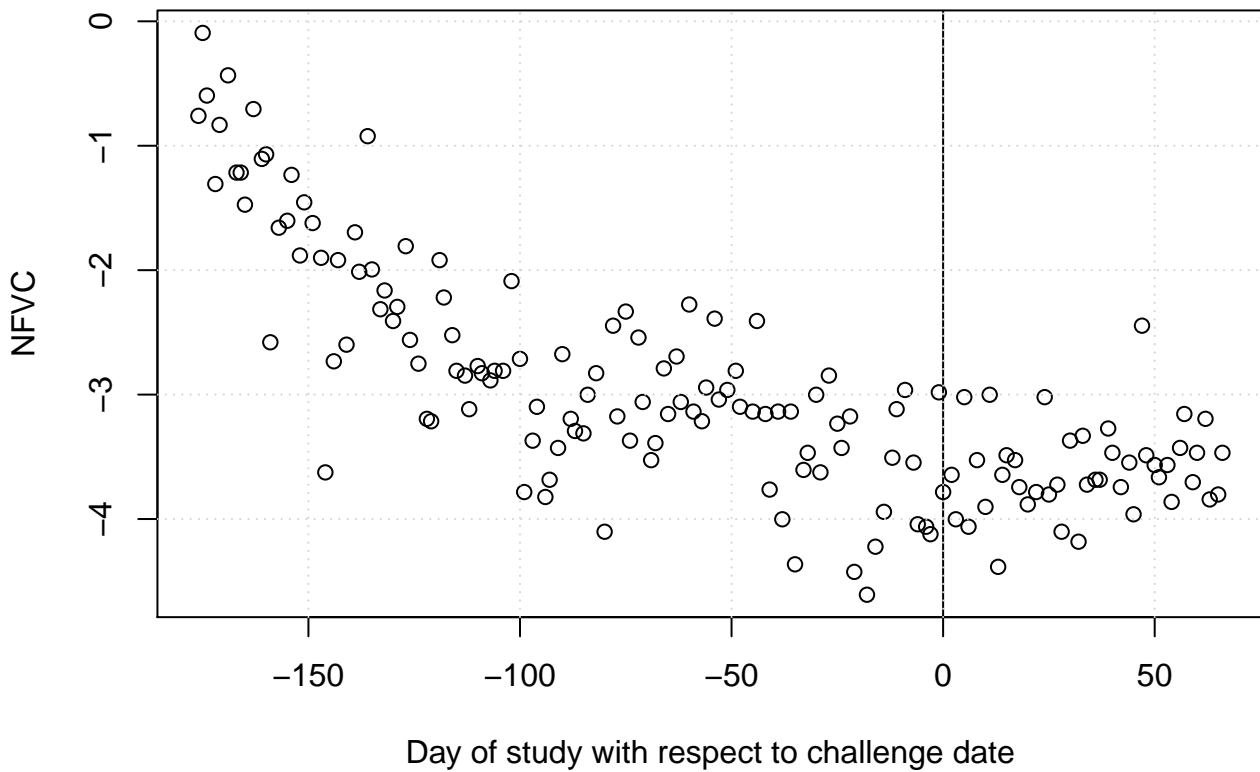

**P09A**

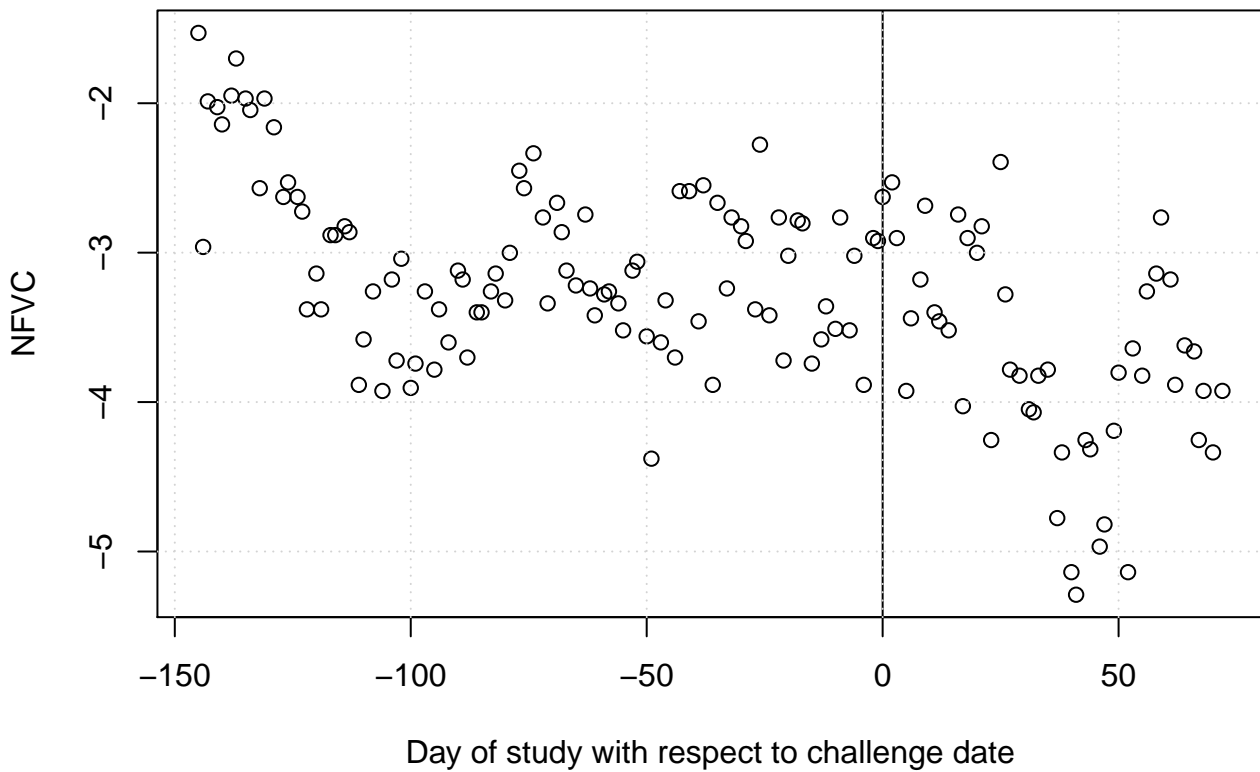



# P10A

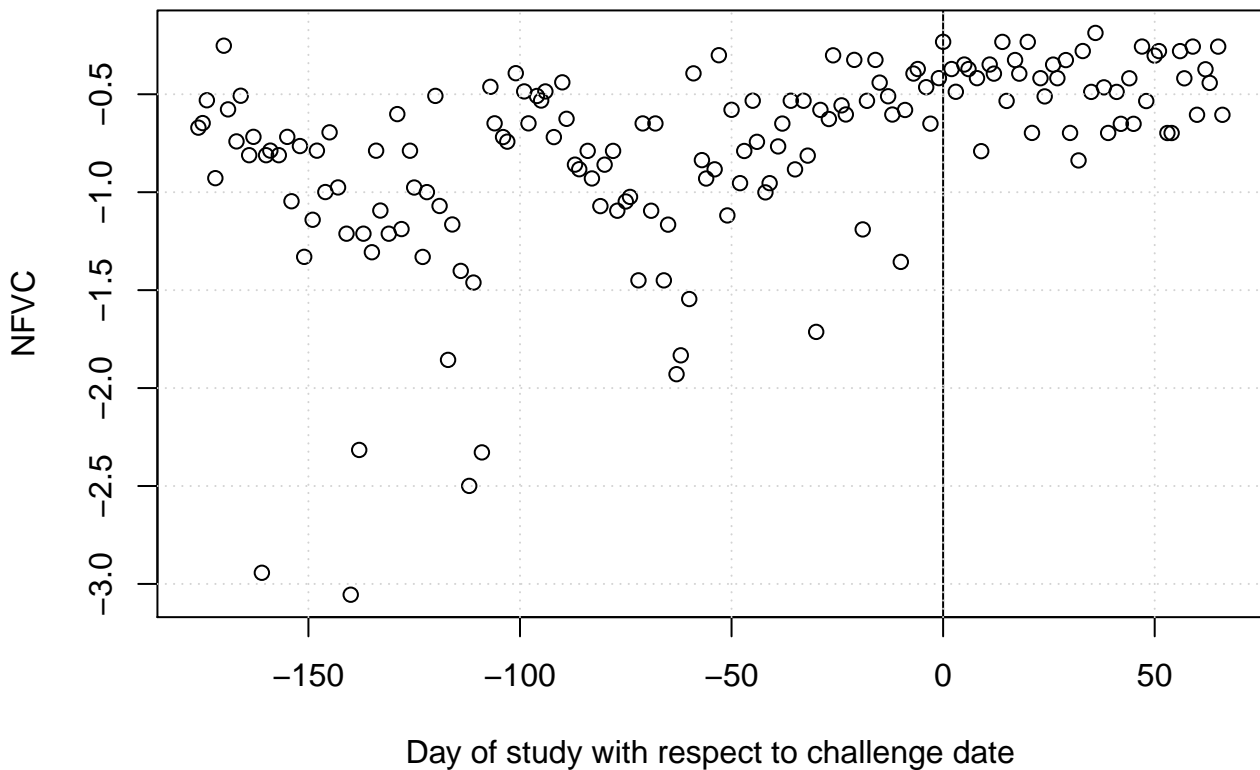

# P11A

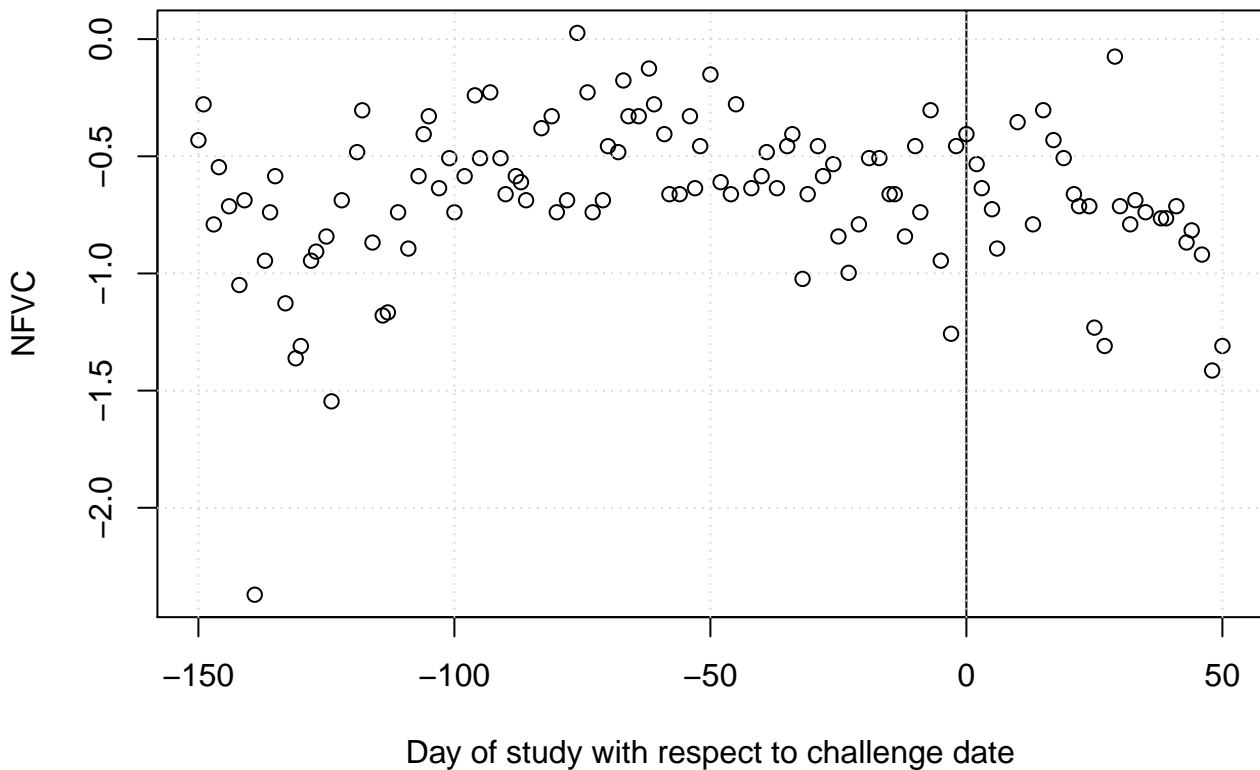

## P12A

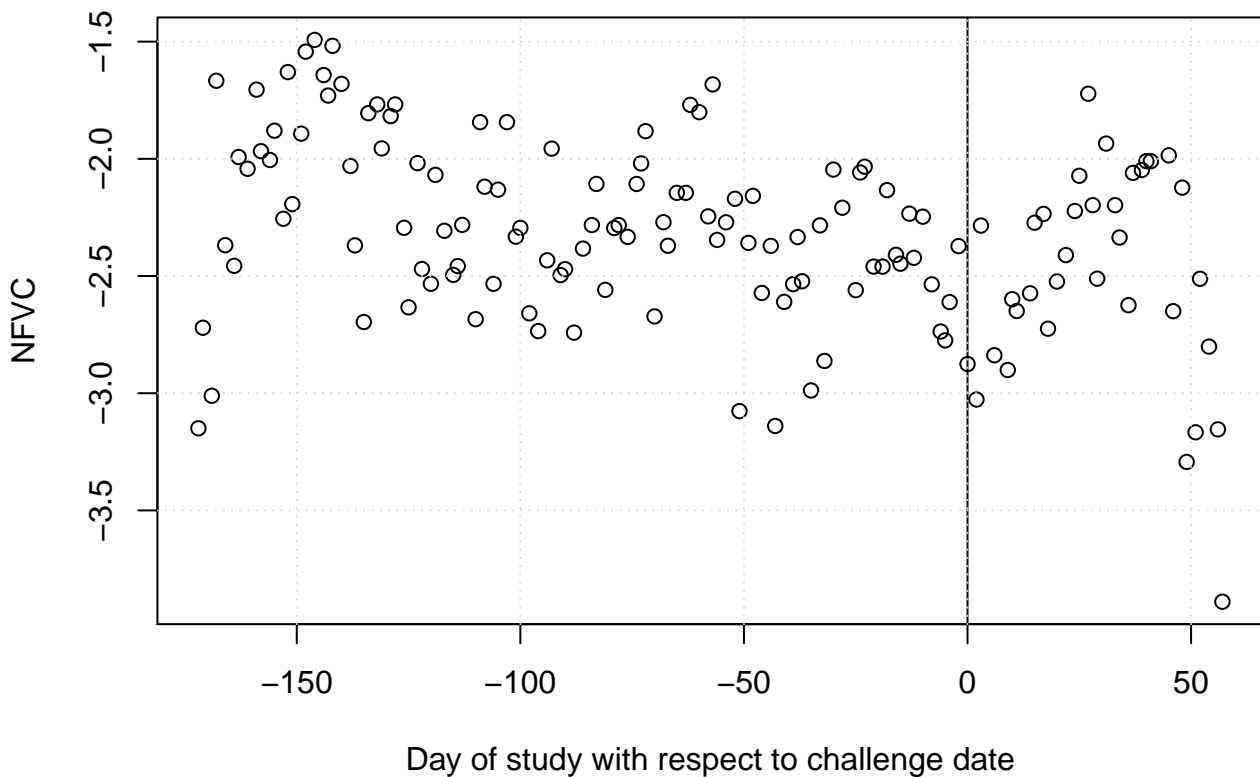

# P13A

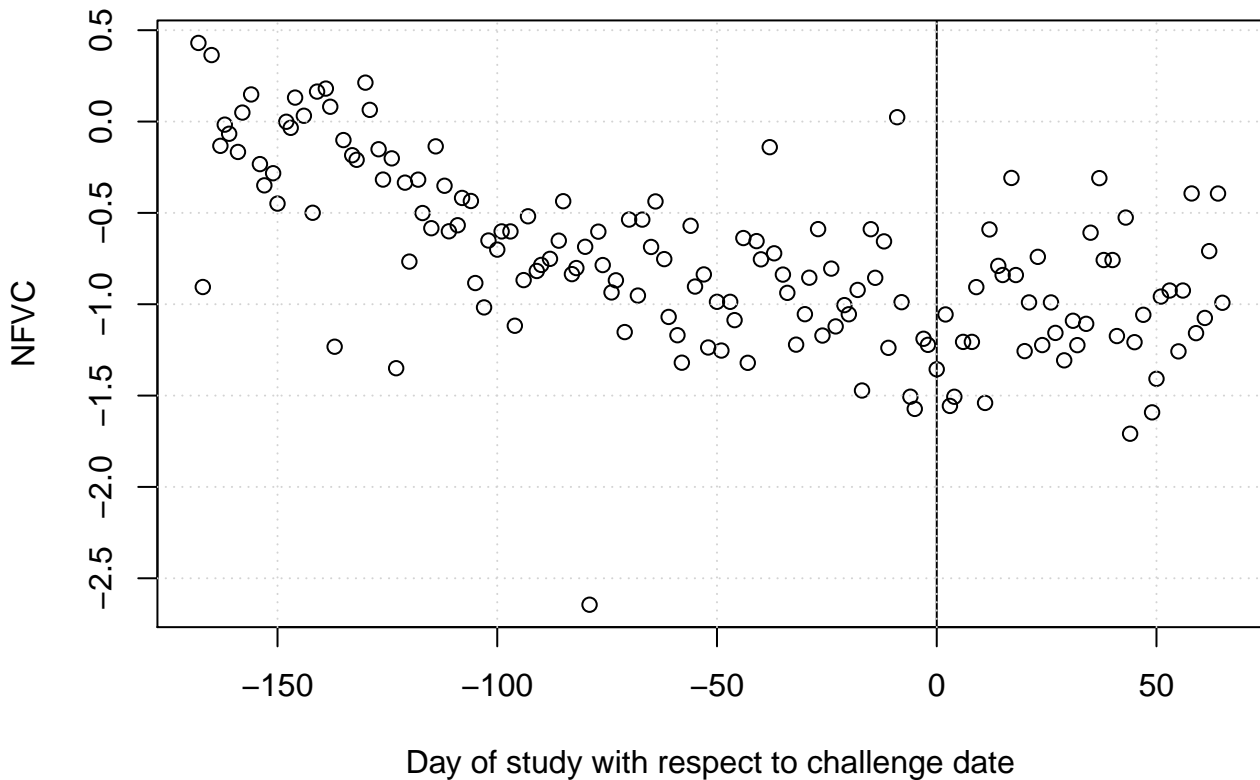

# P01H

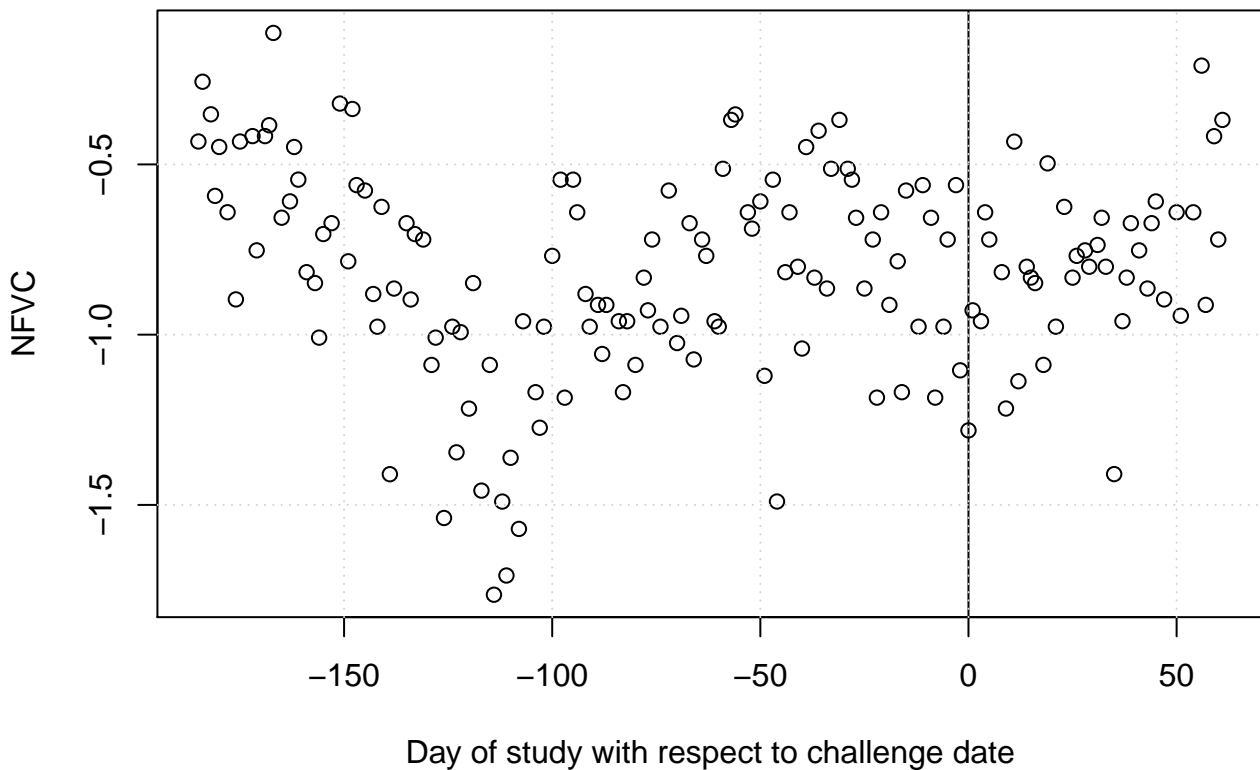

# P03H

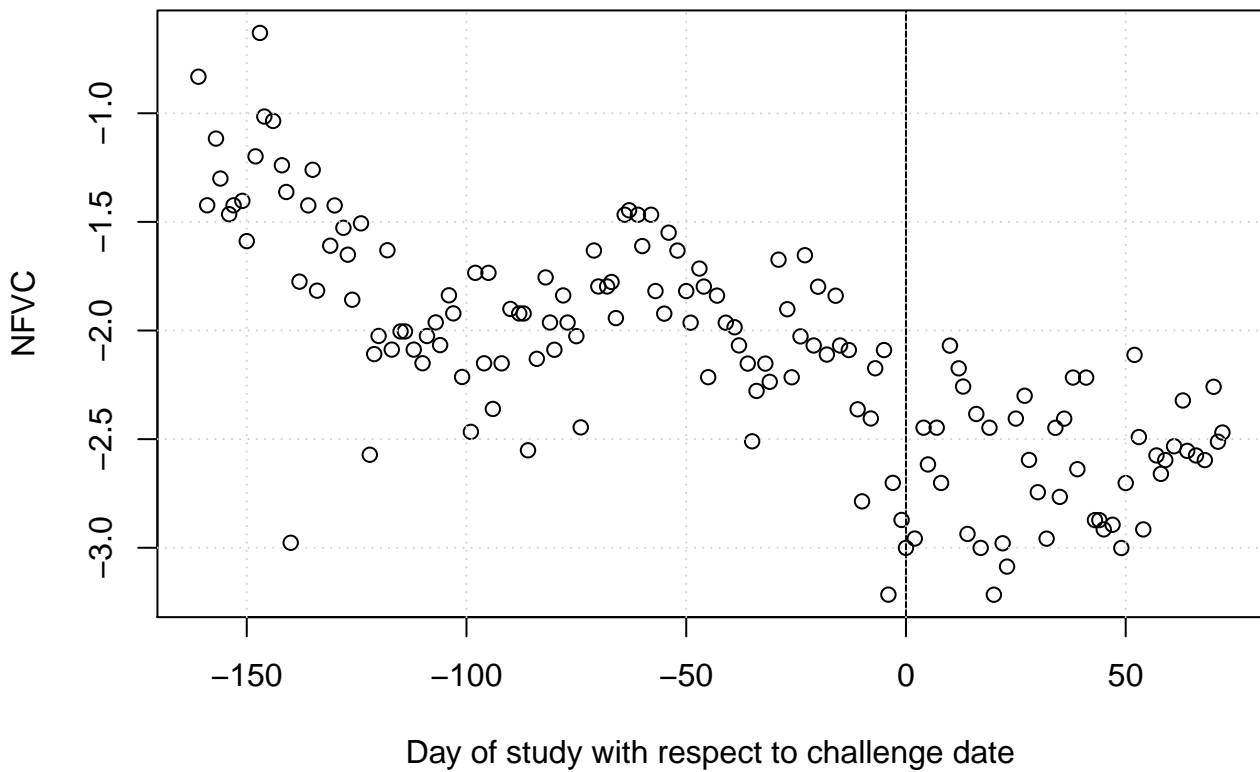

# P05H

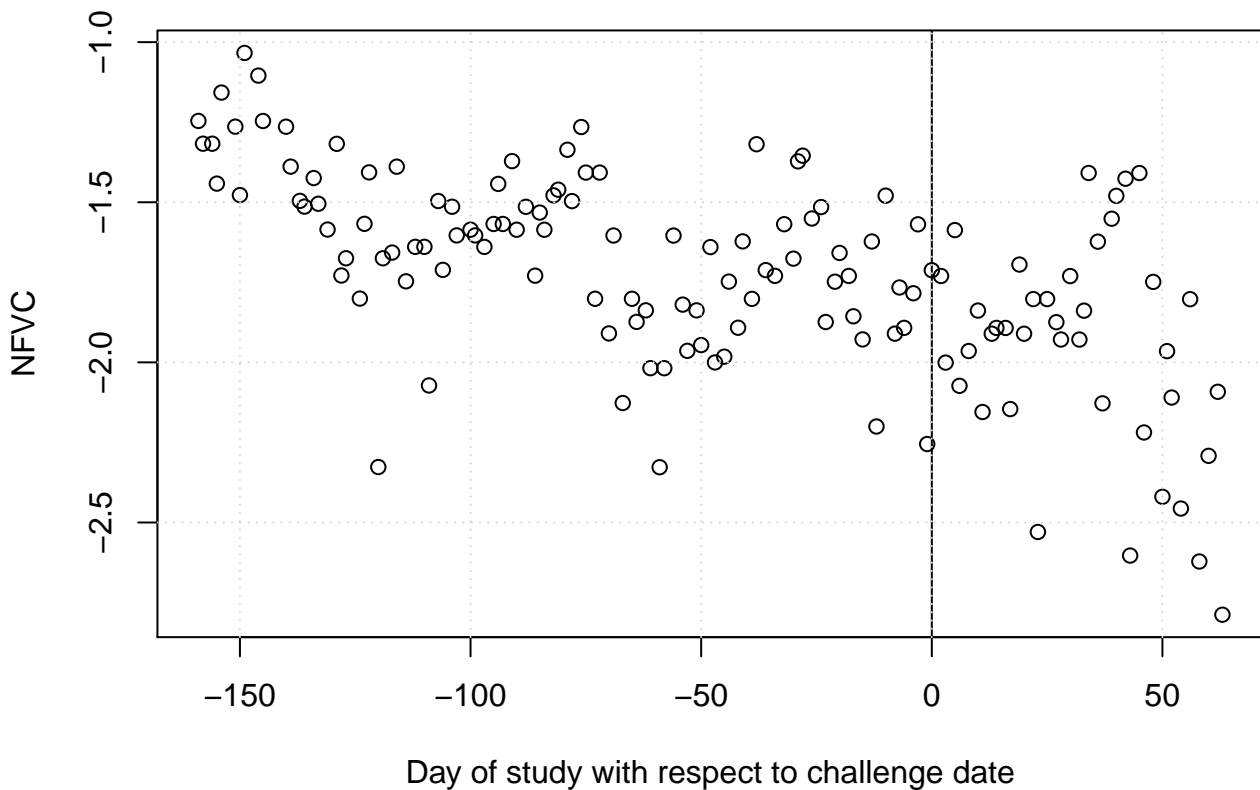

# P06H

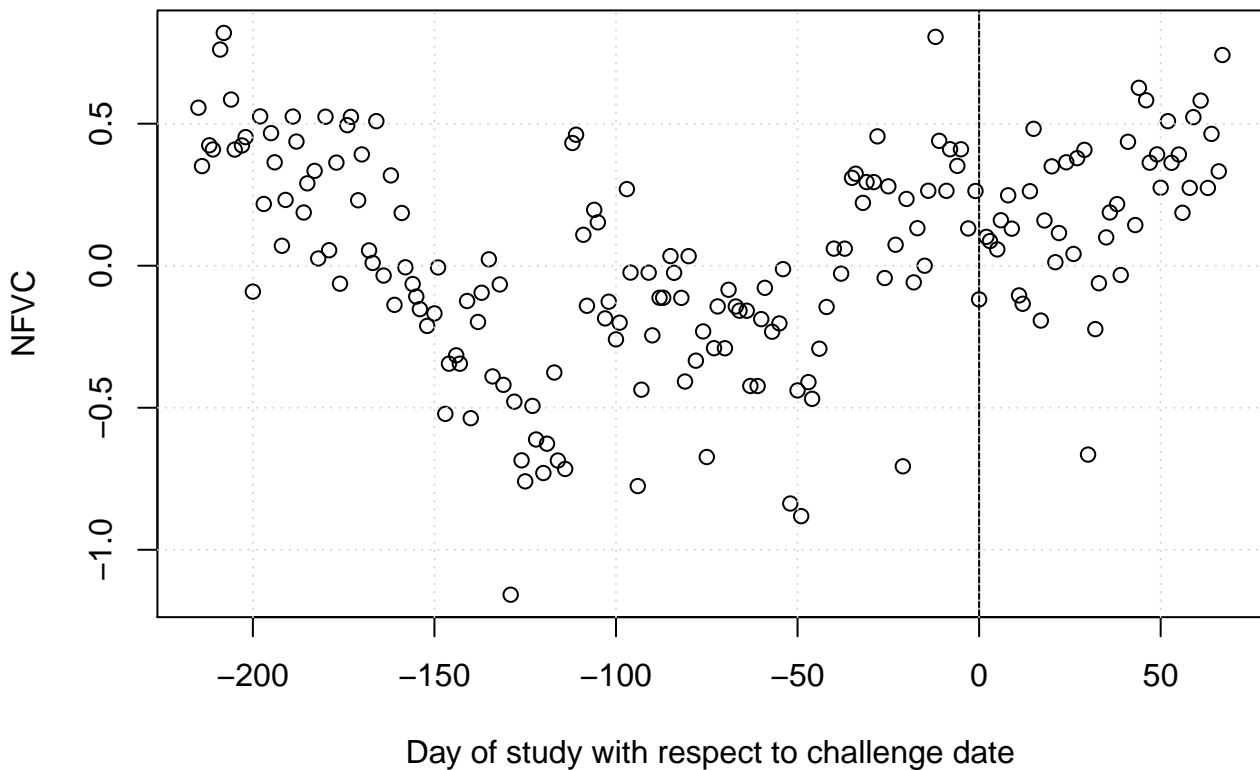



**P07H**

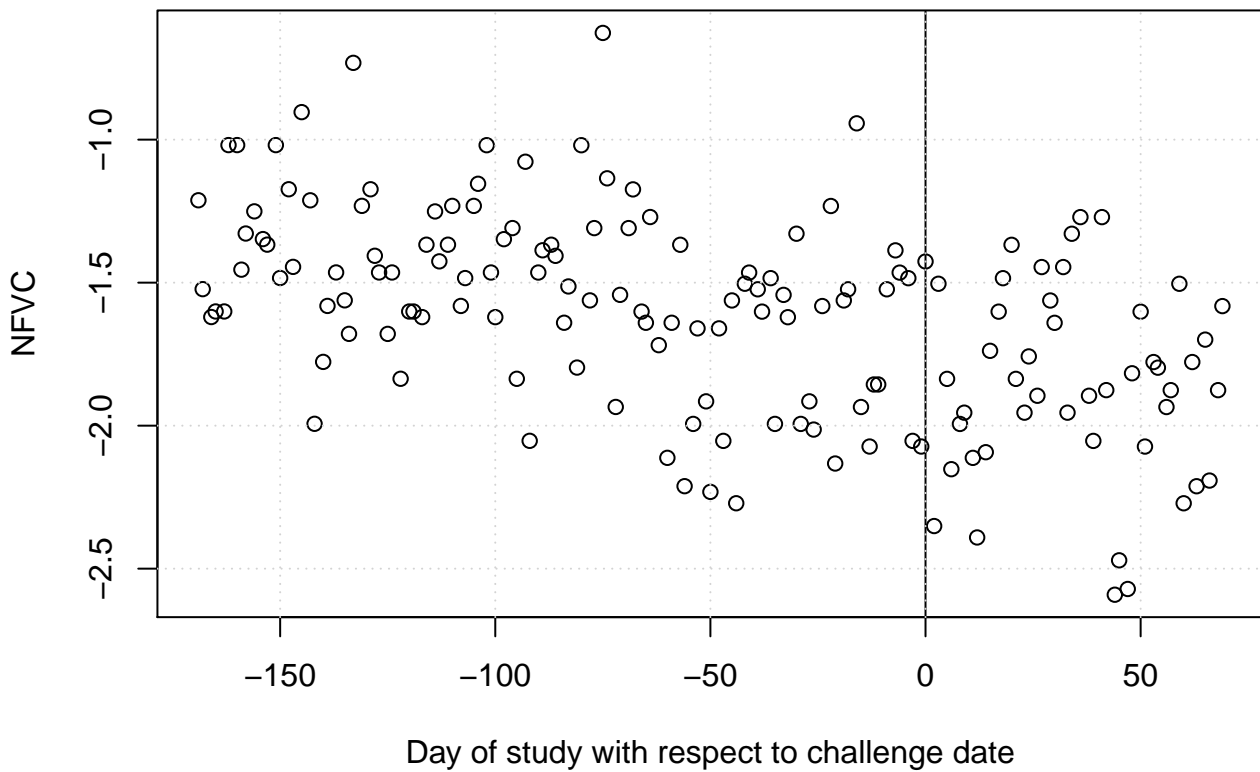

**P08H**

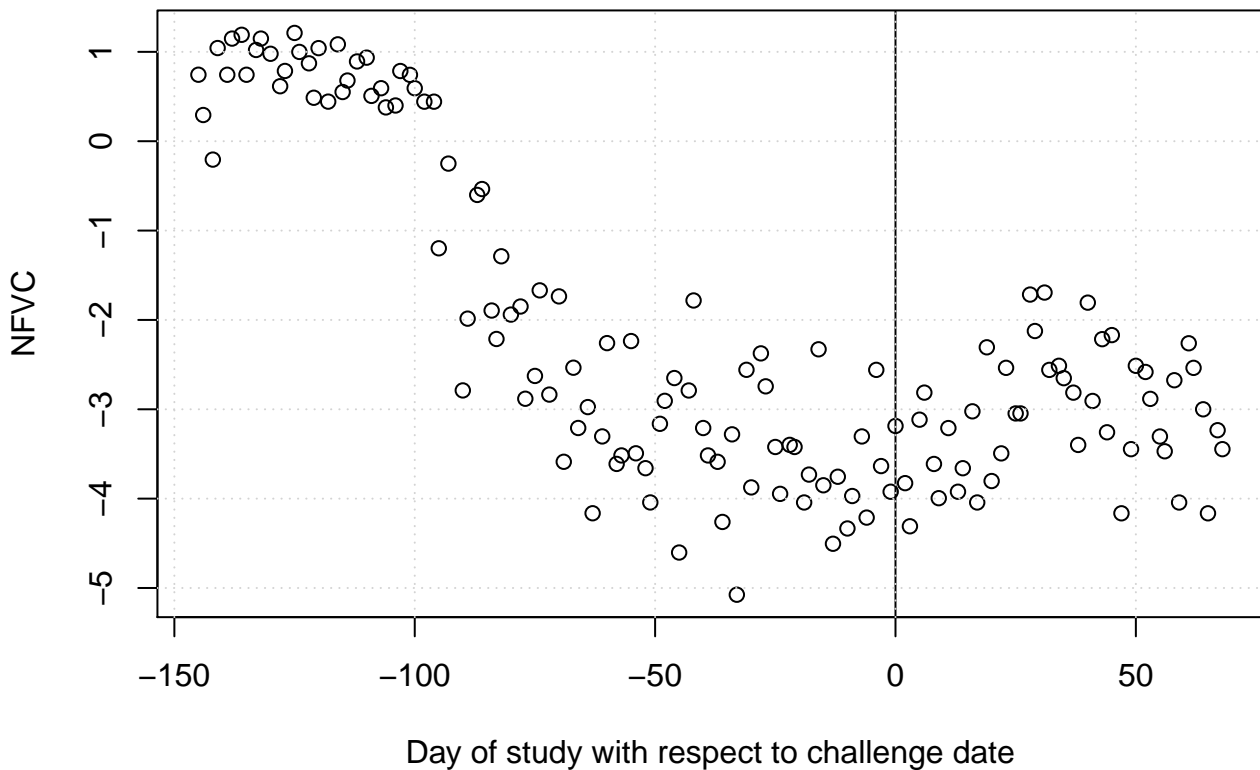

# P09H

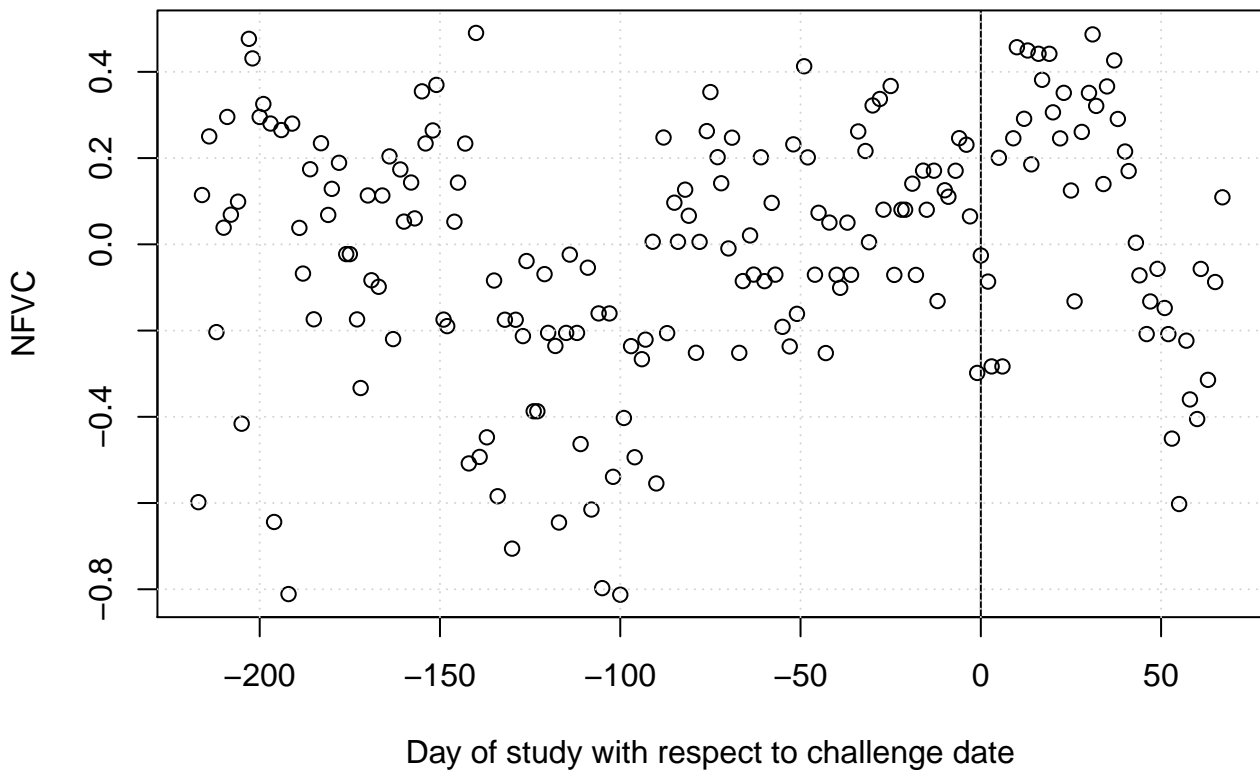

# P11H

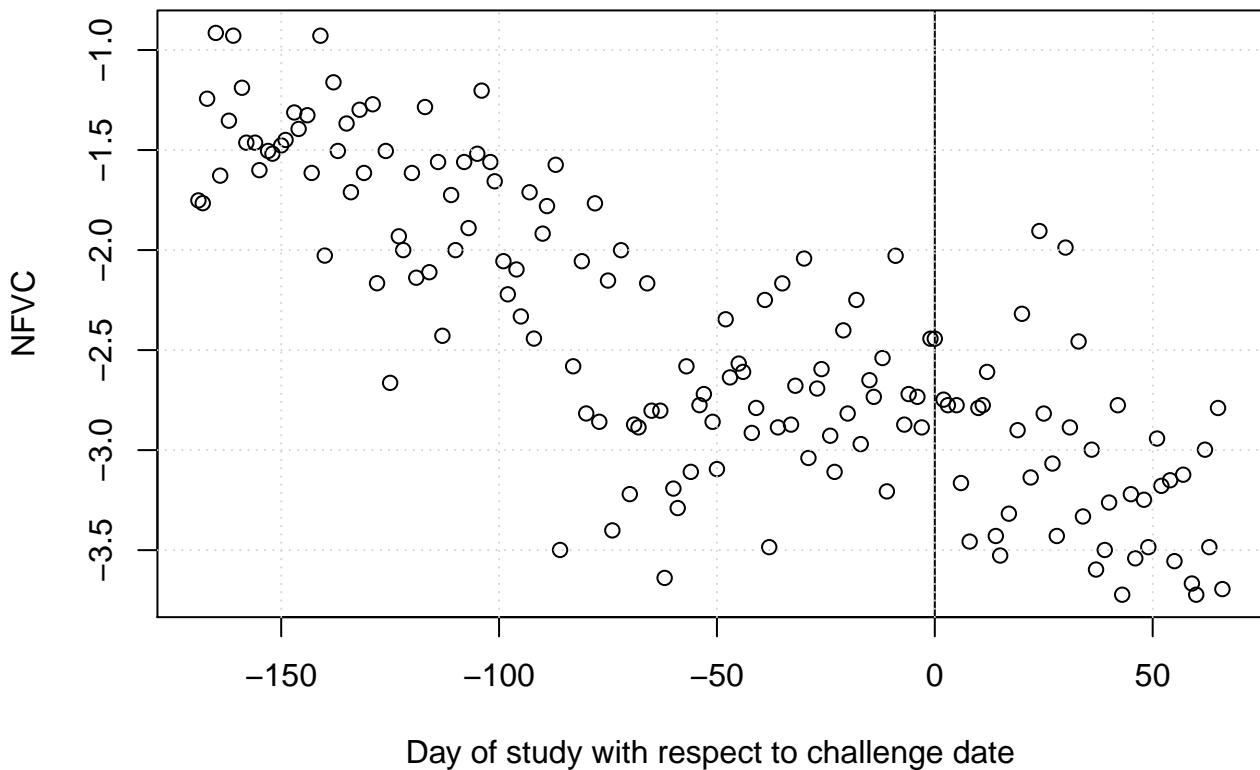

# P12H

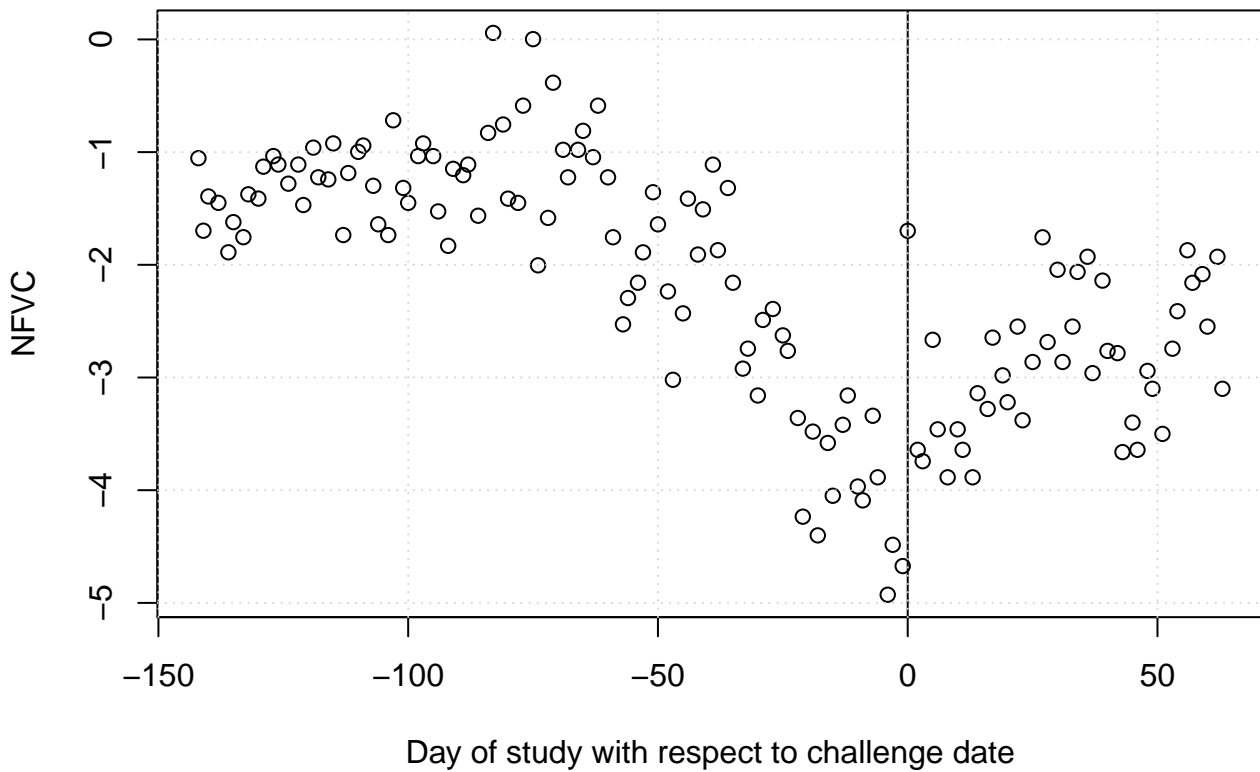

# P13H

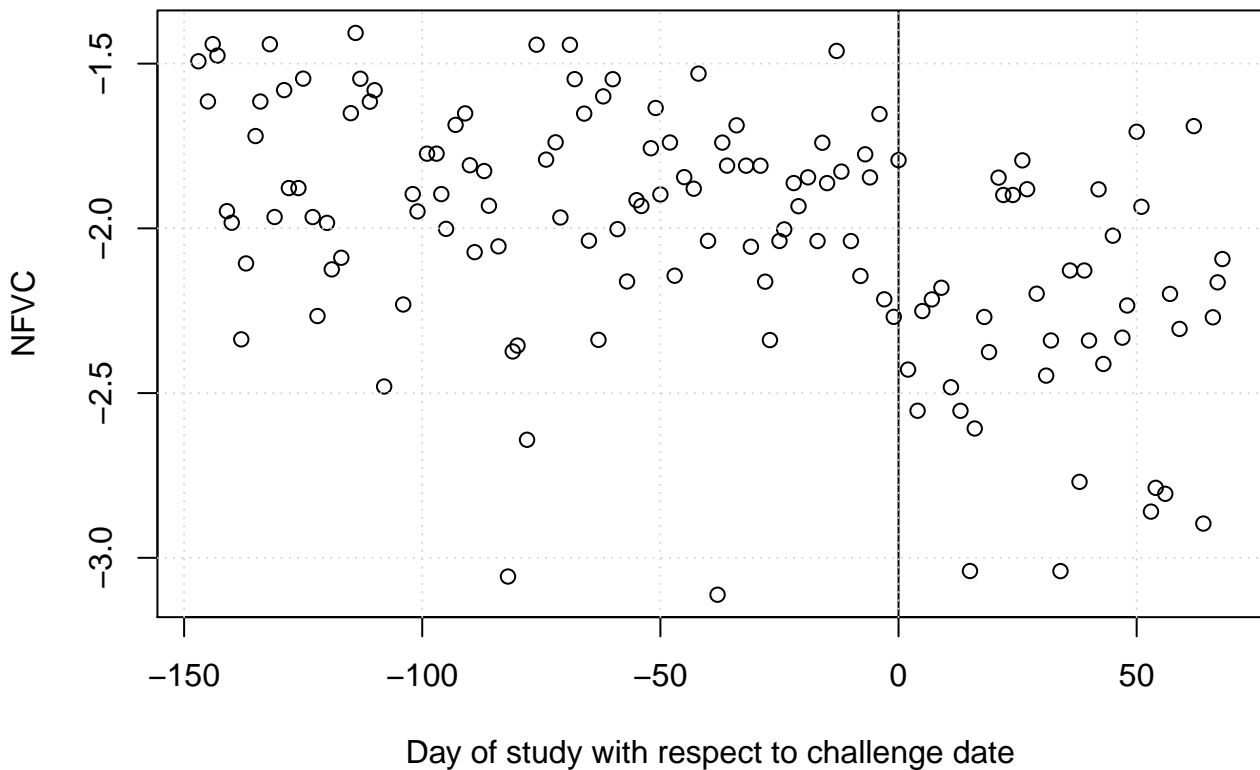

# P14H

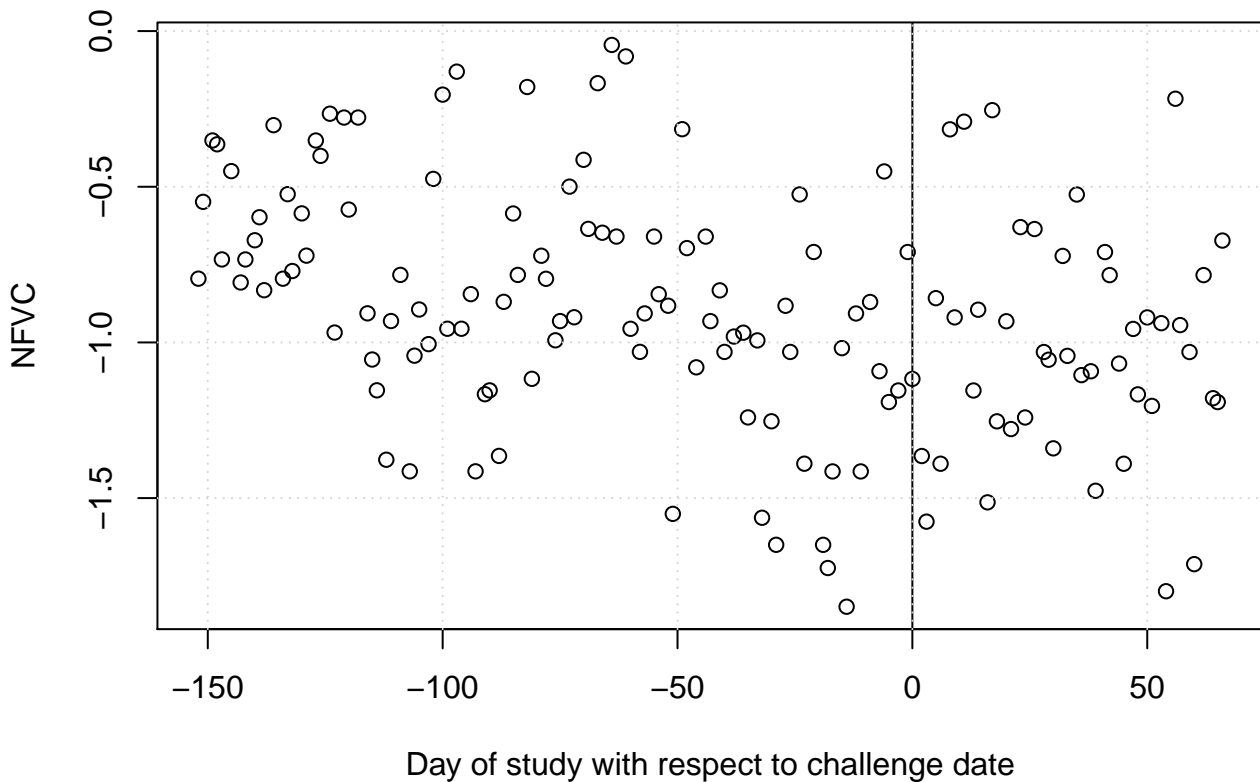

# P15H

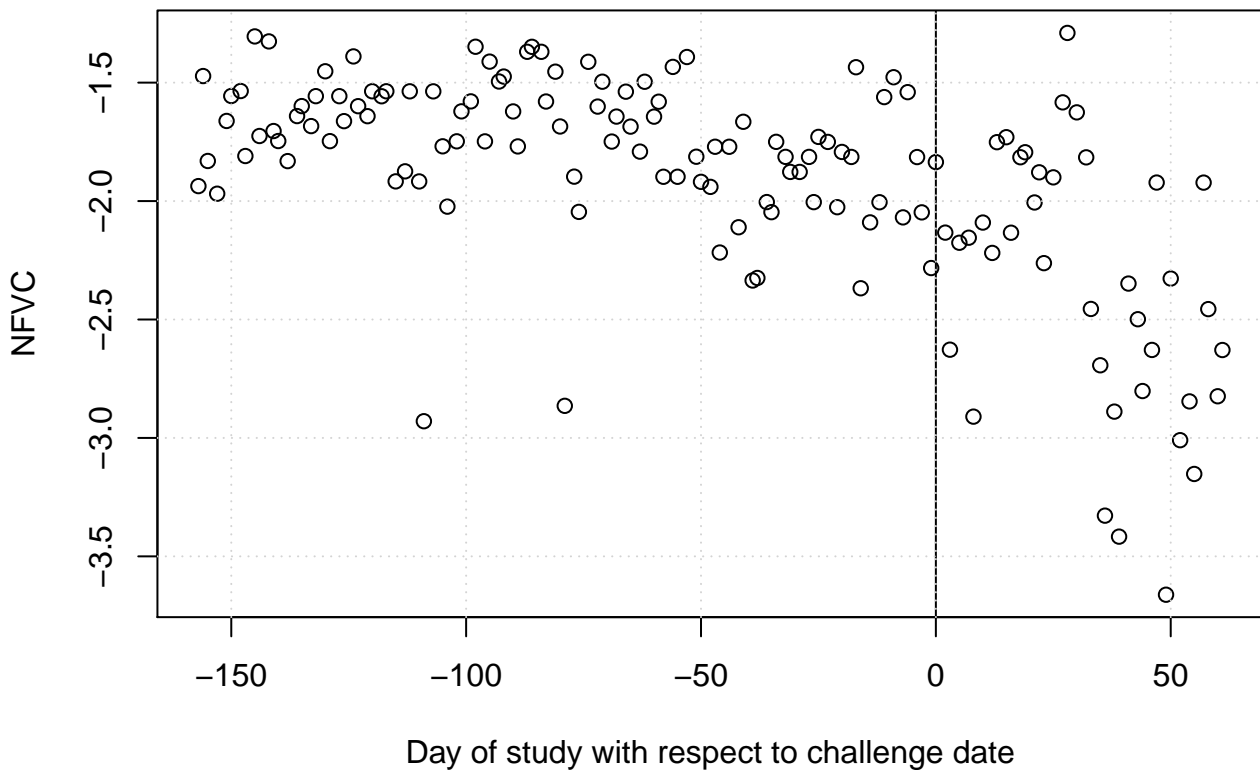



# P01A

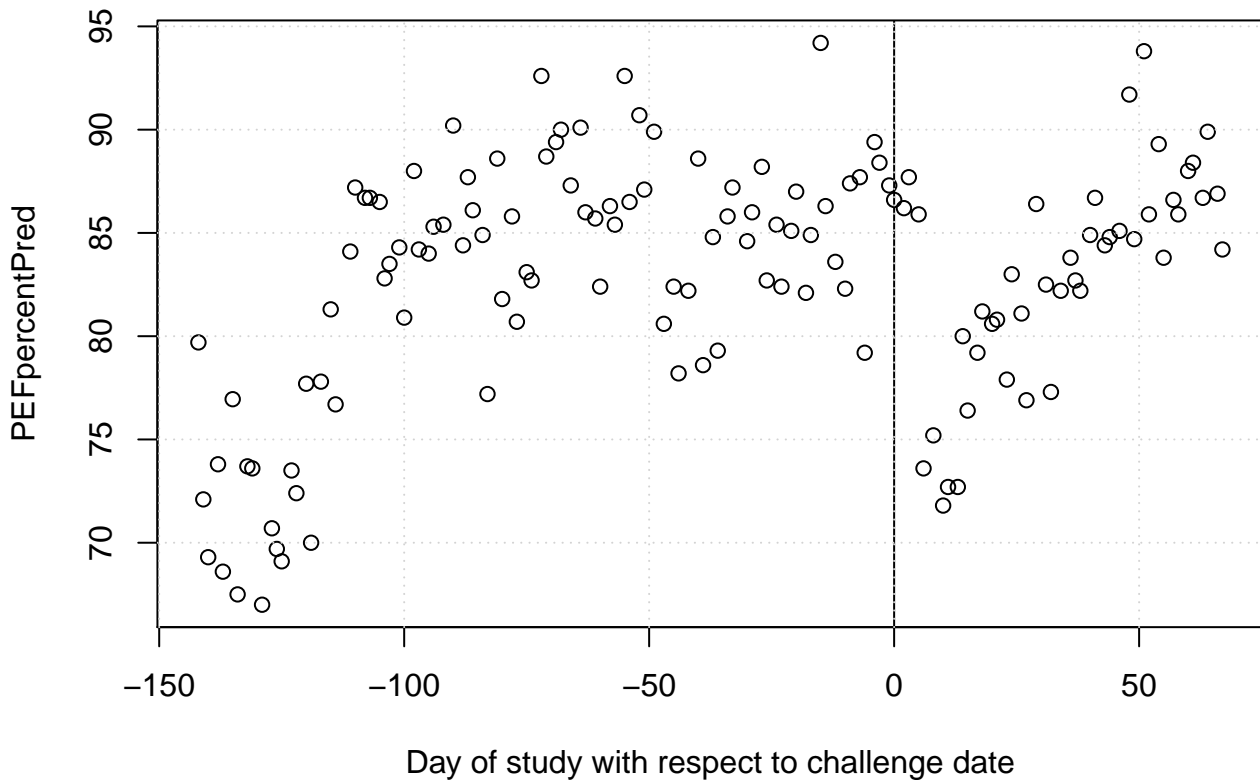

# P02A

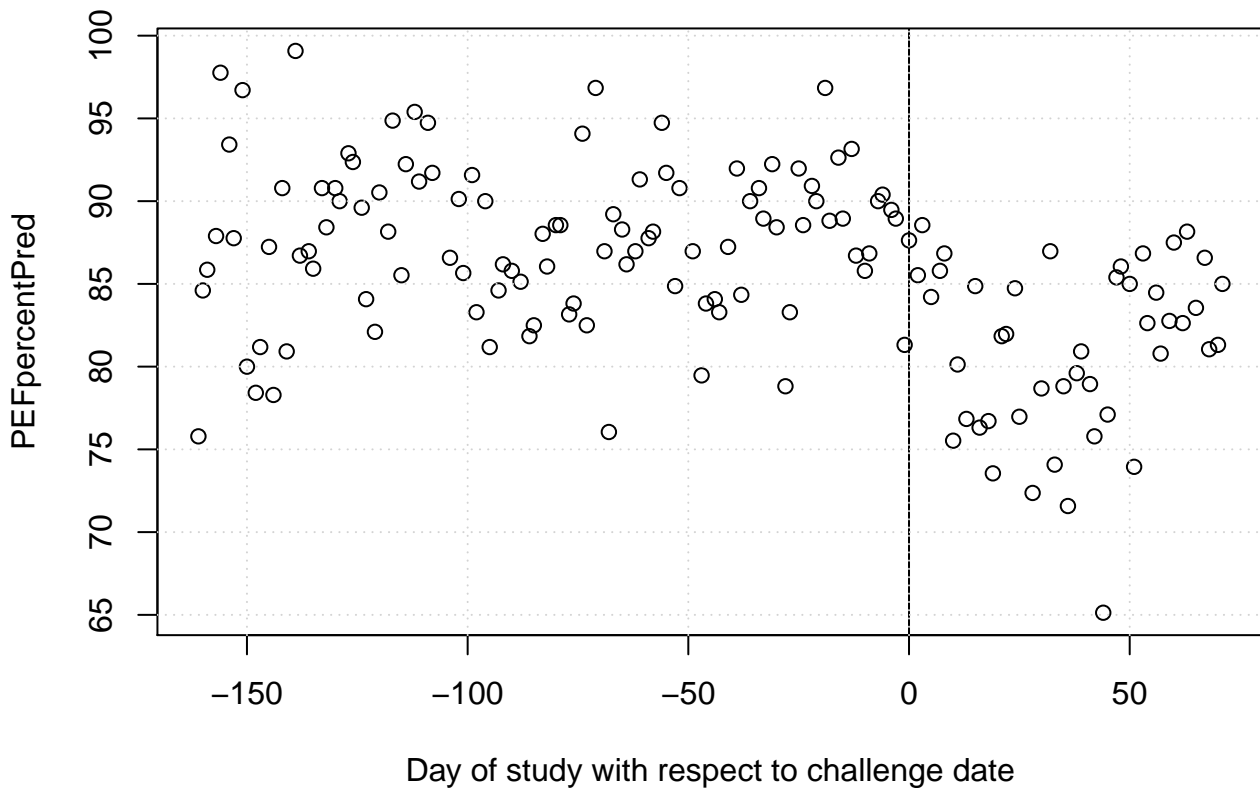

# P04A

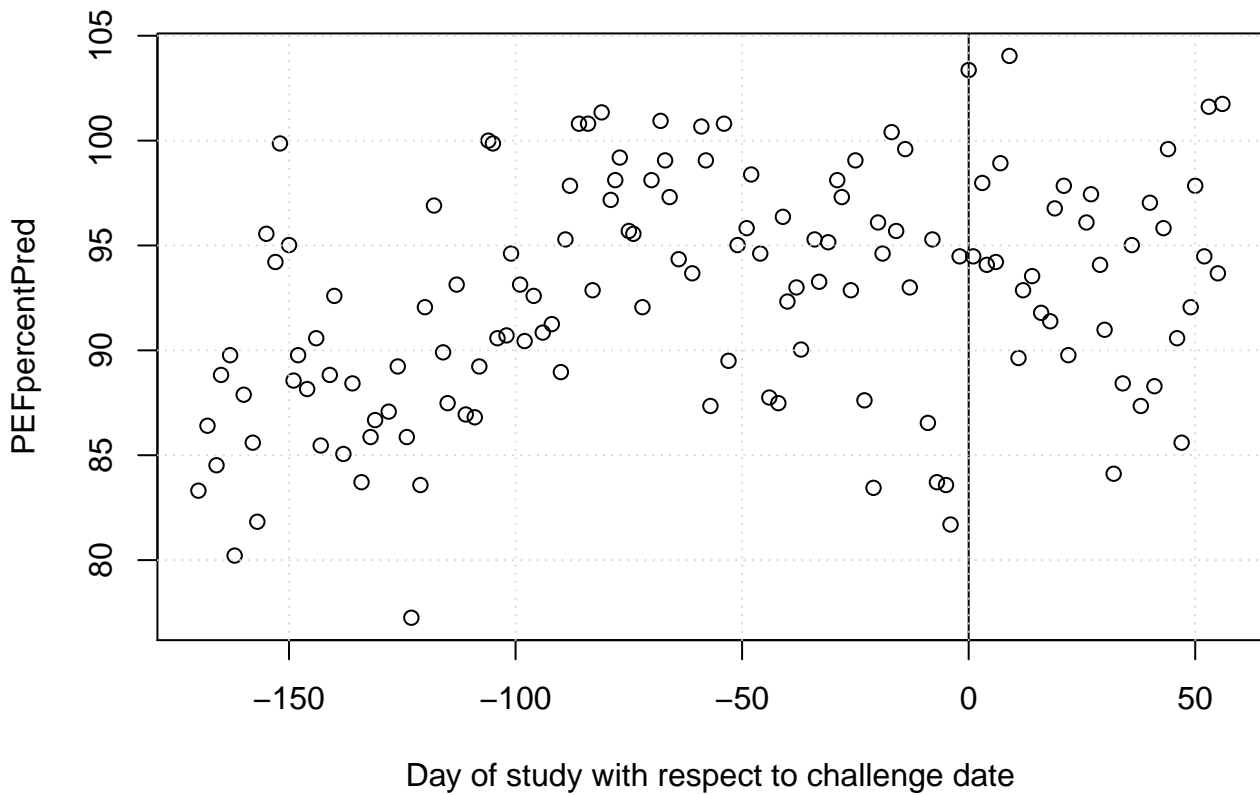

# P05A

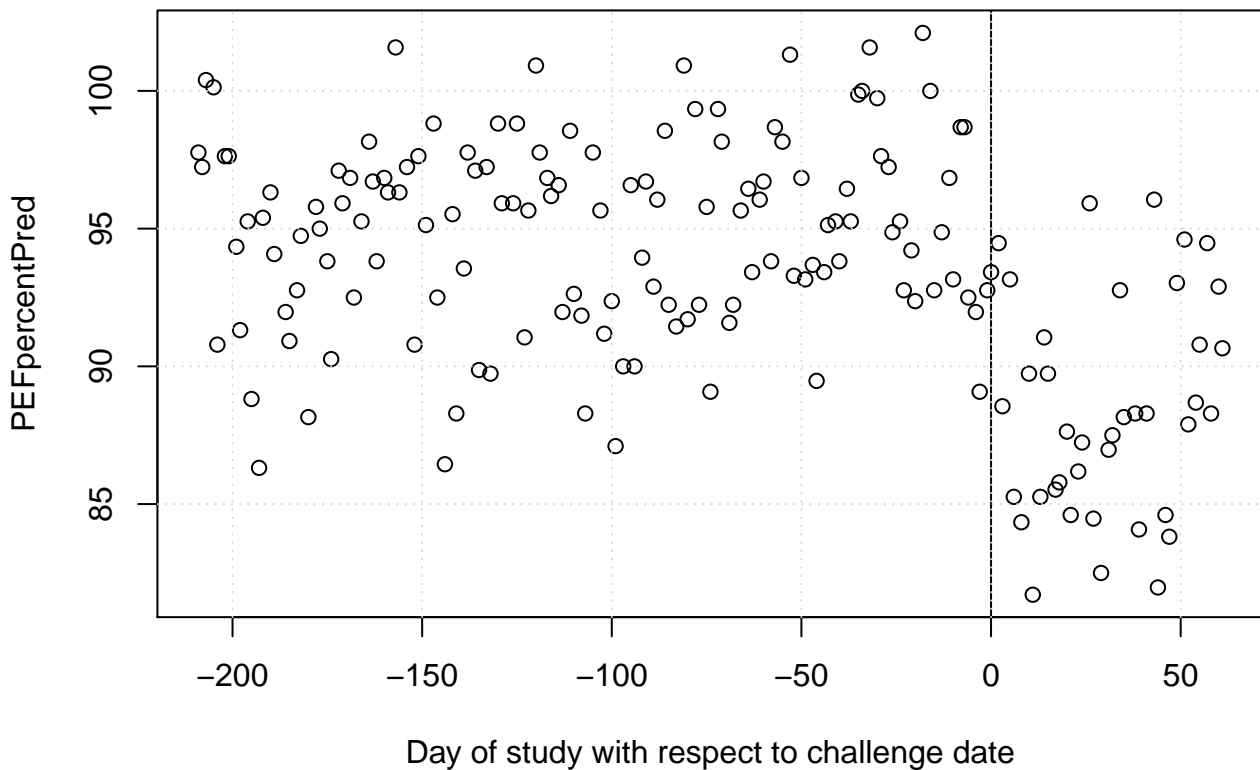

# P06A

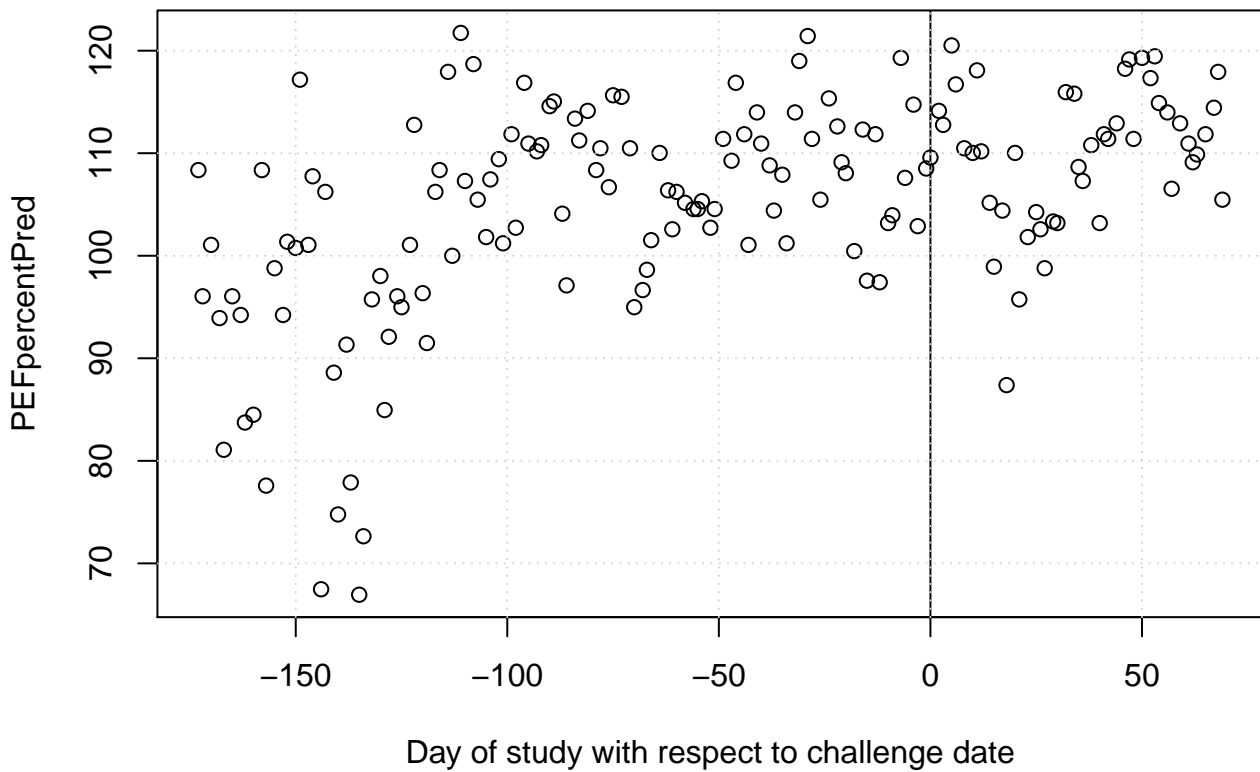

**P07A**

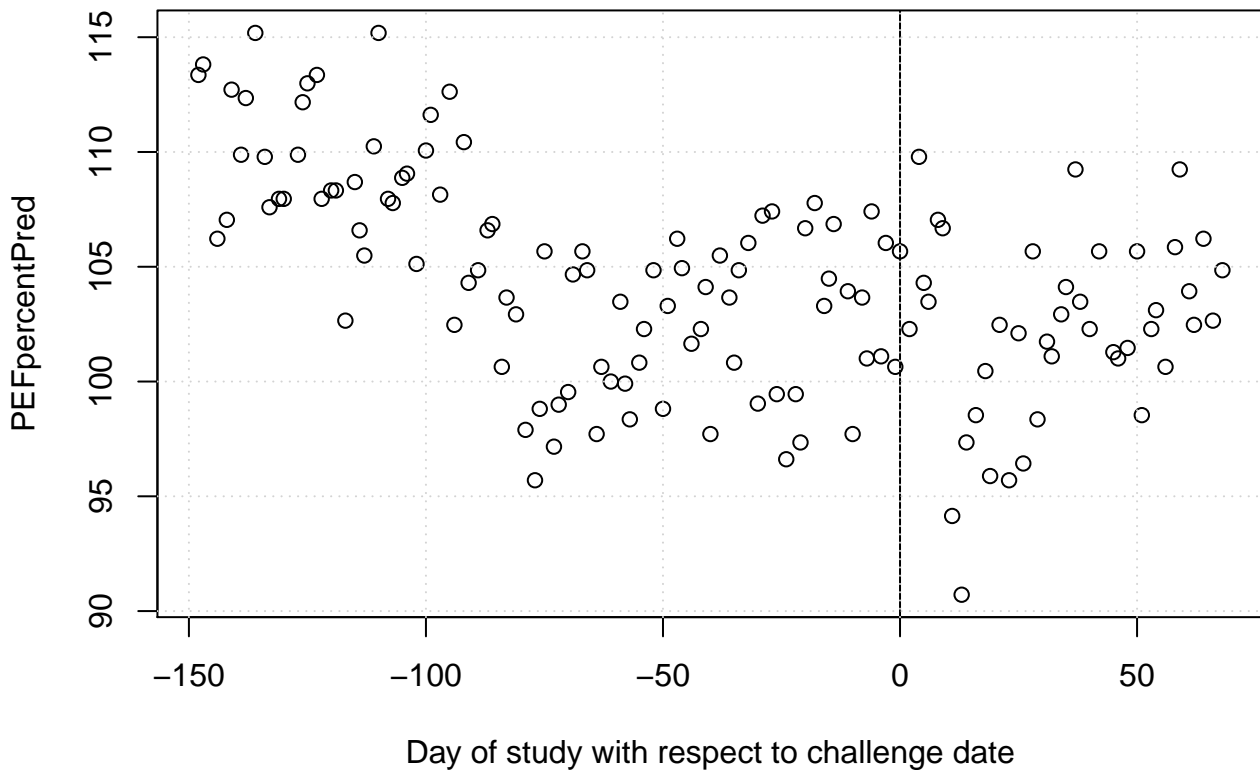

**P08A**

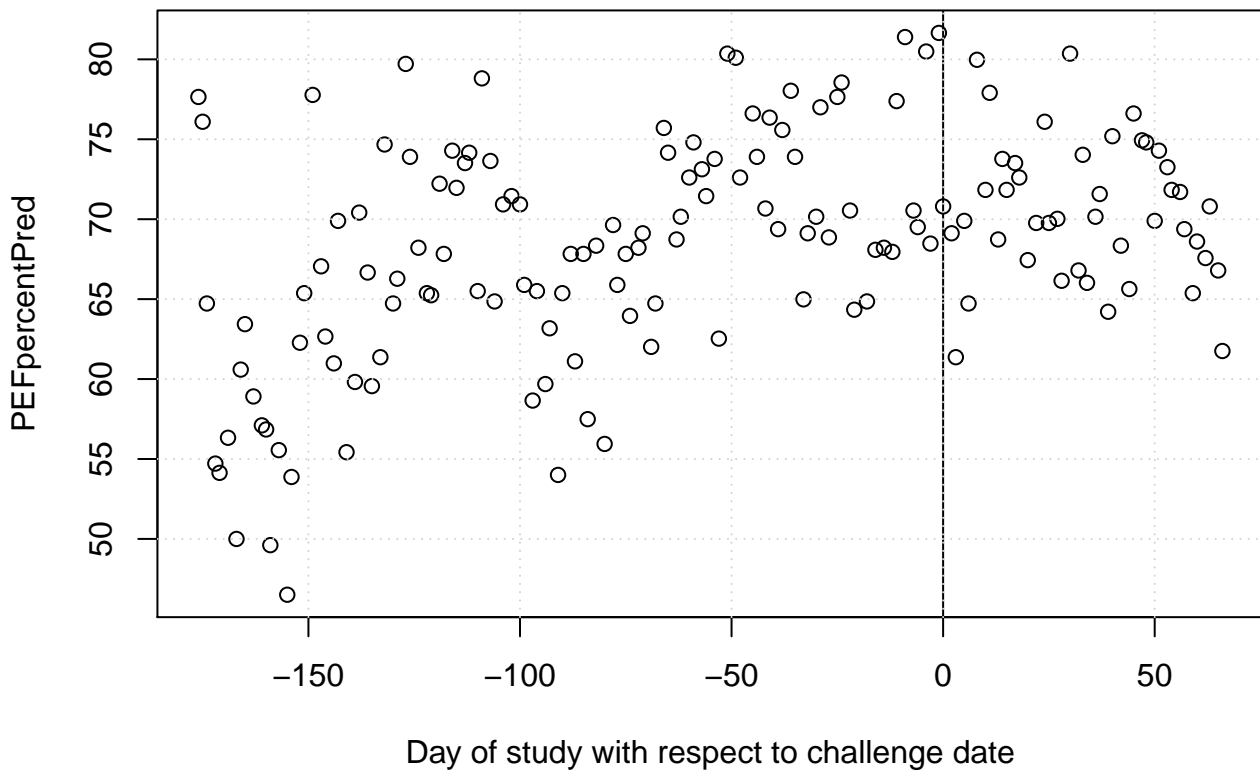

# P09A

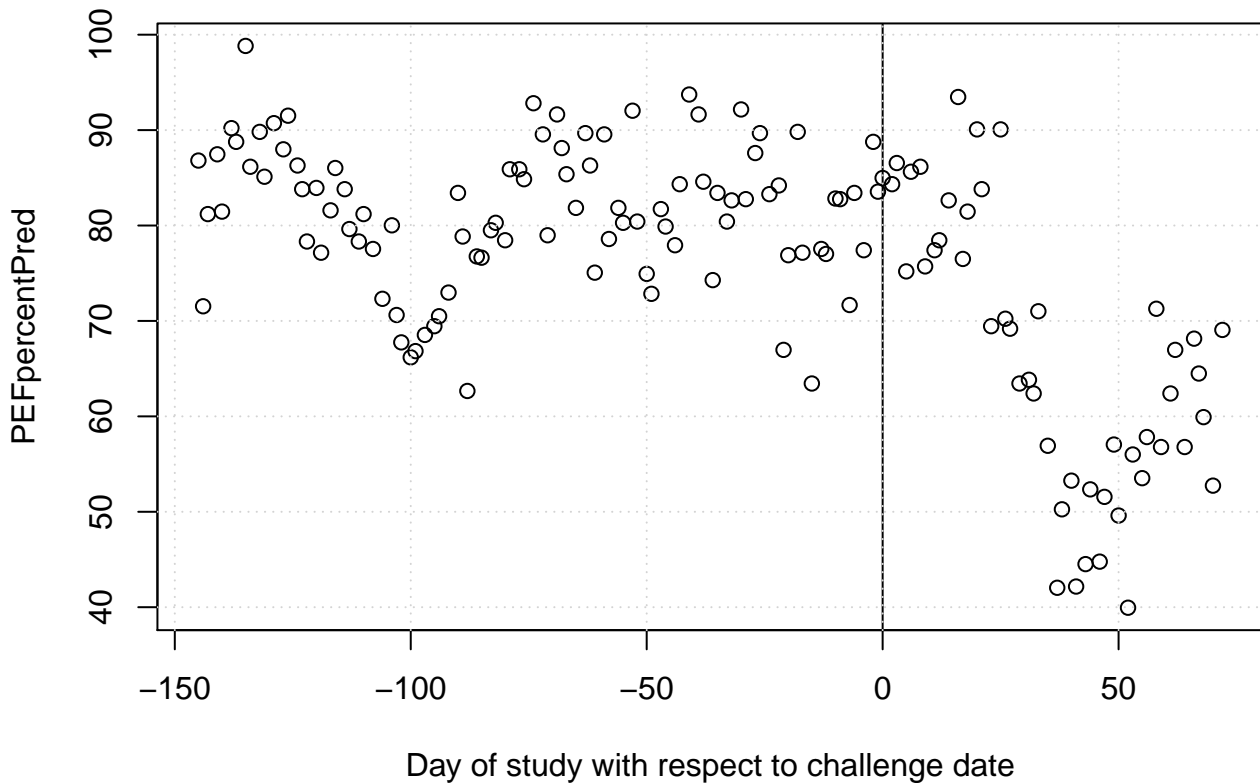



# P10A

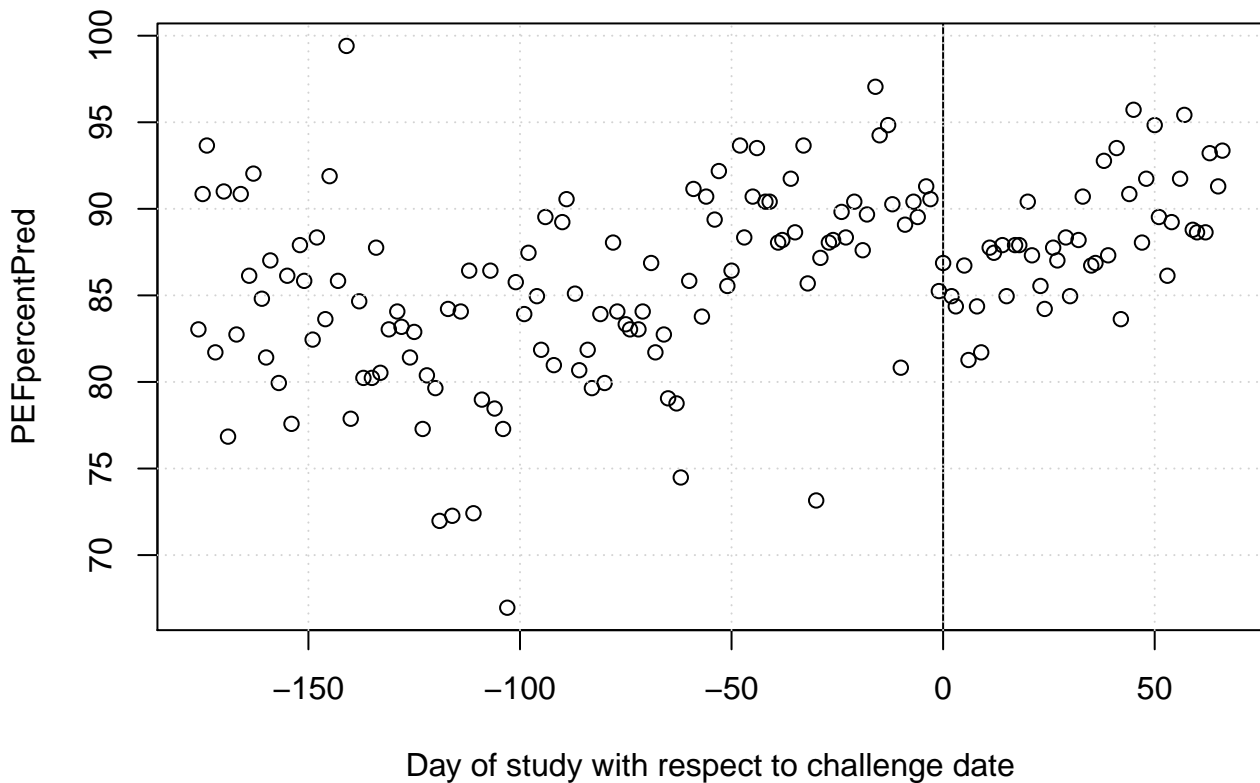

# P11A

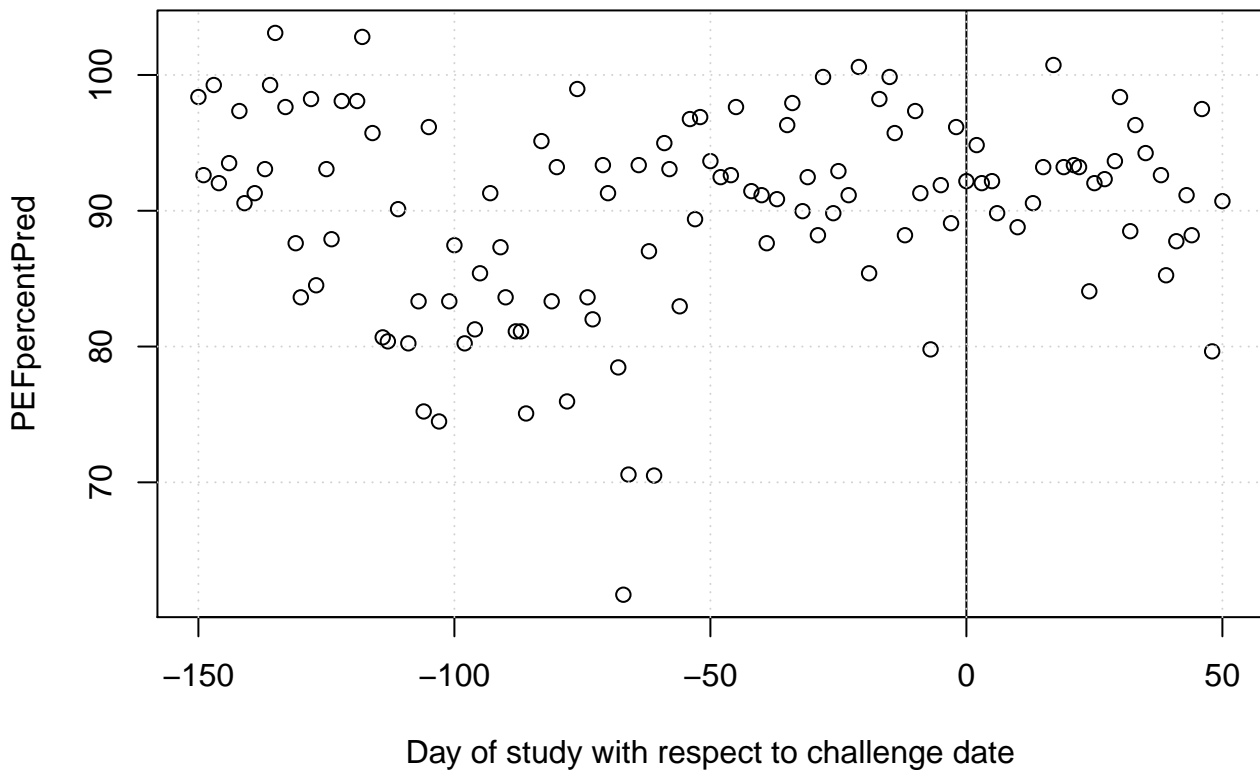

## P12A

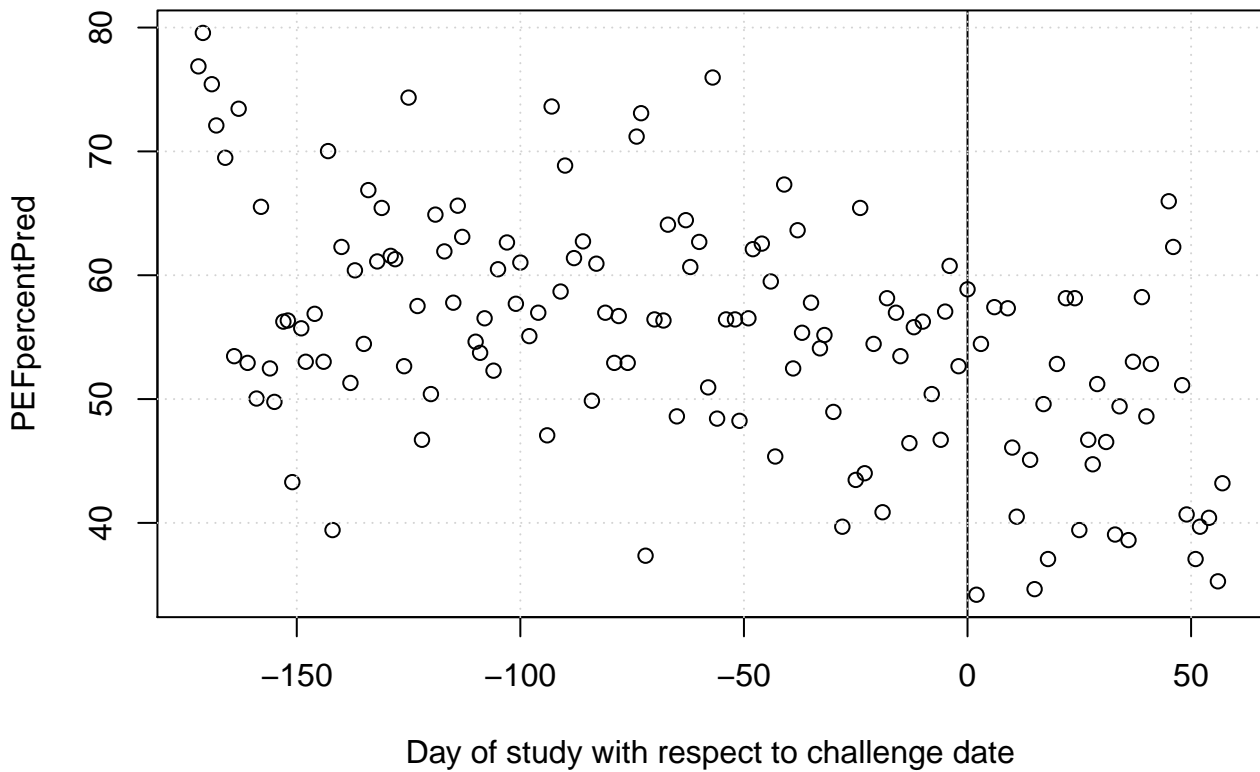

# P13A

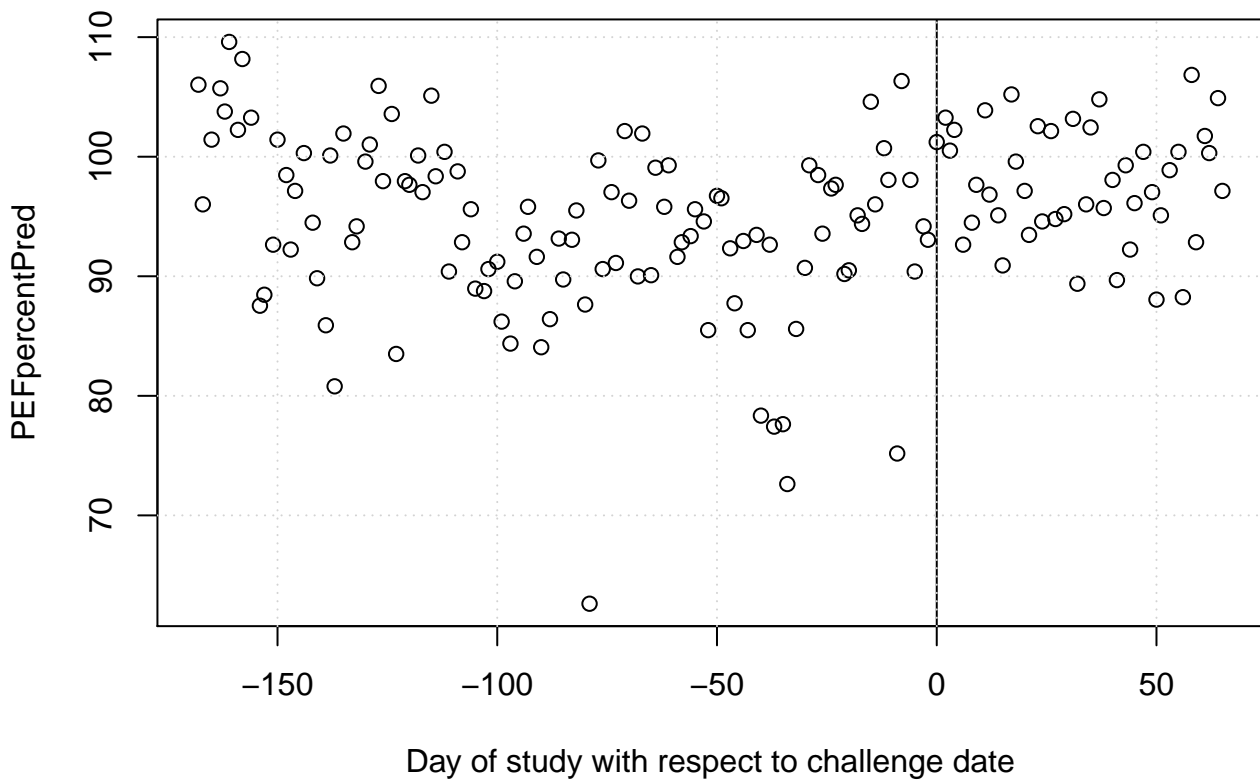

# P01H

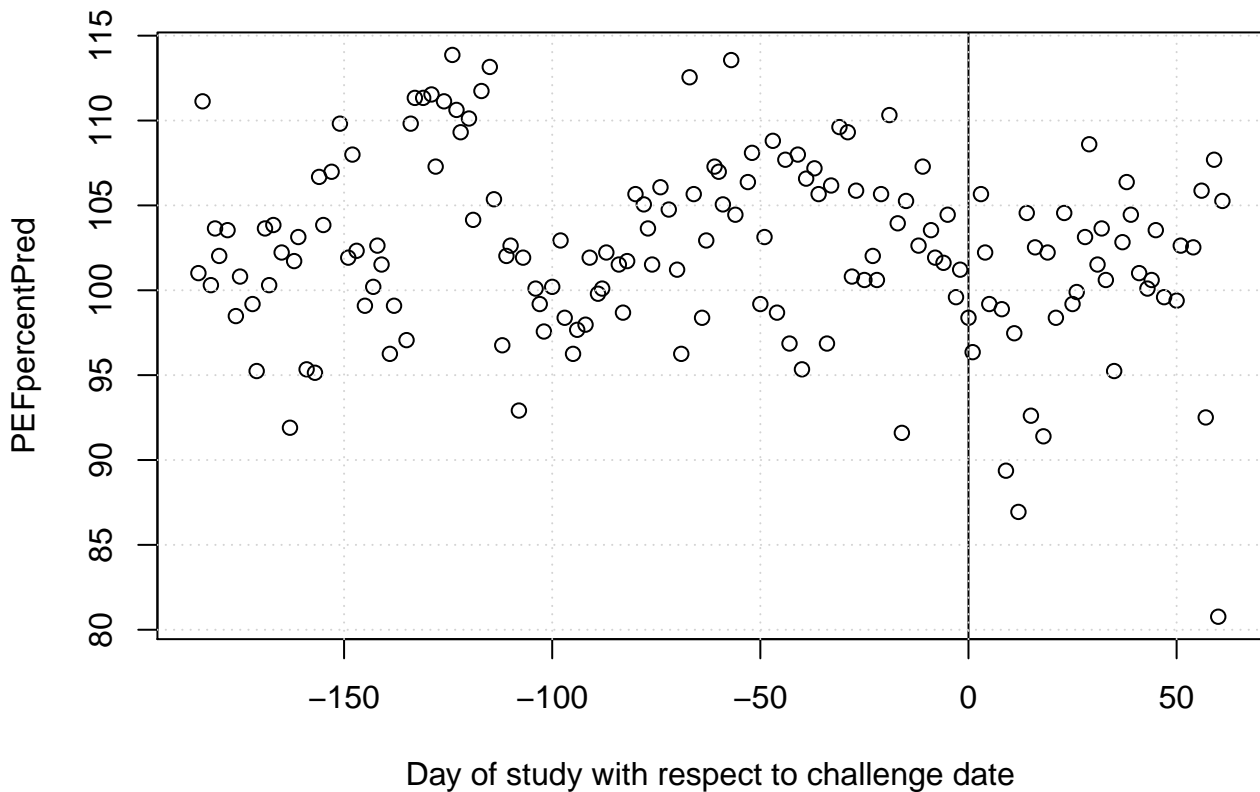

# P03H

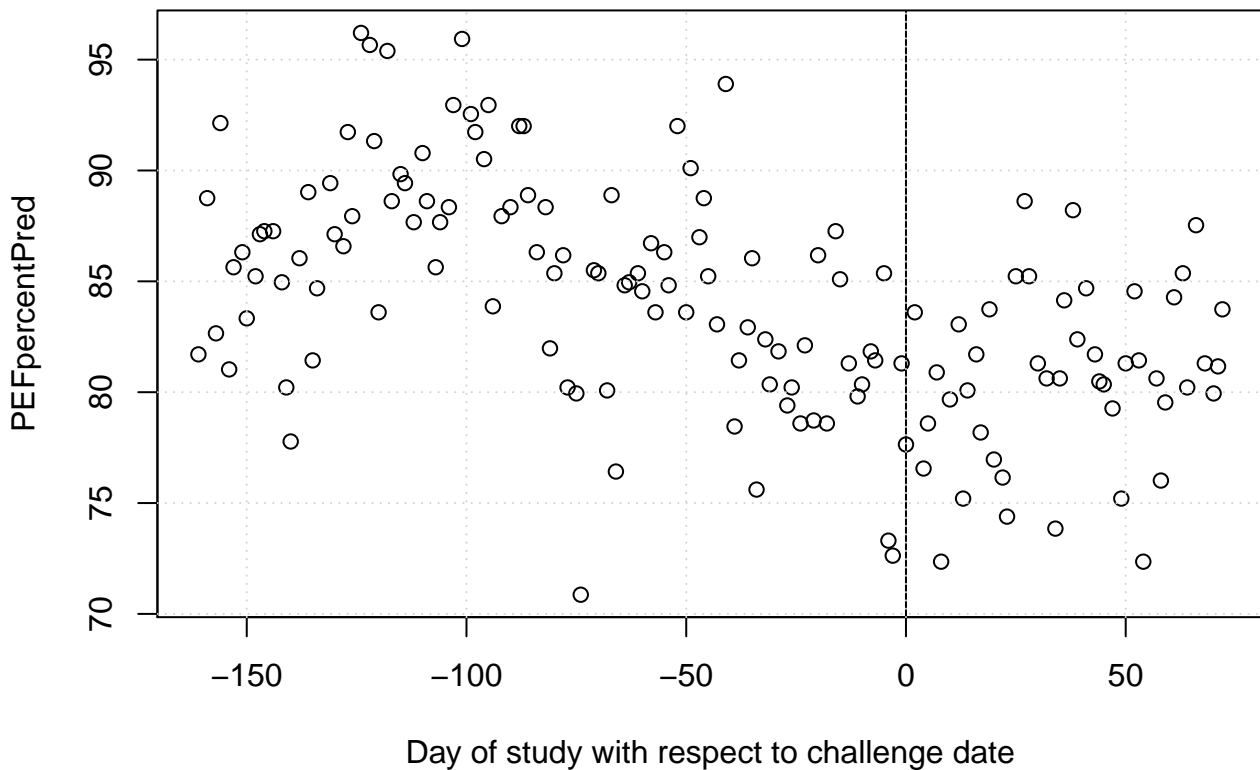

# P05H

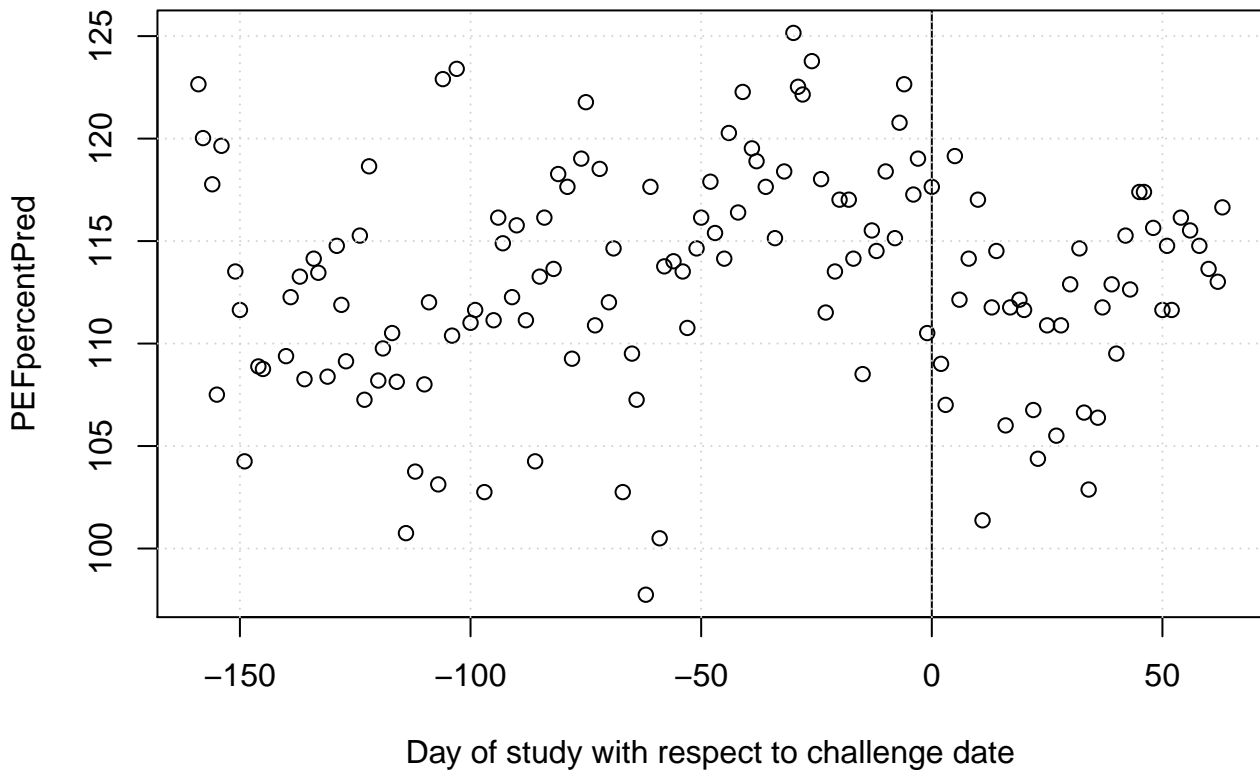

# P06H

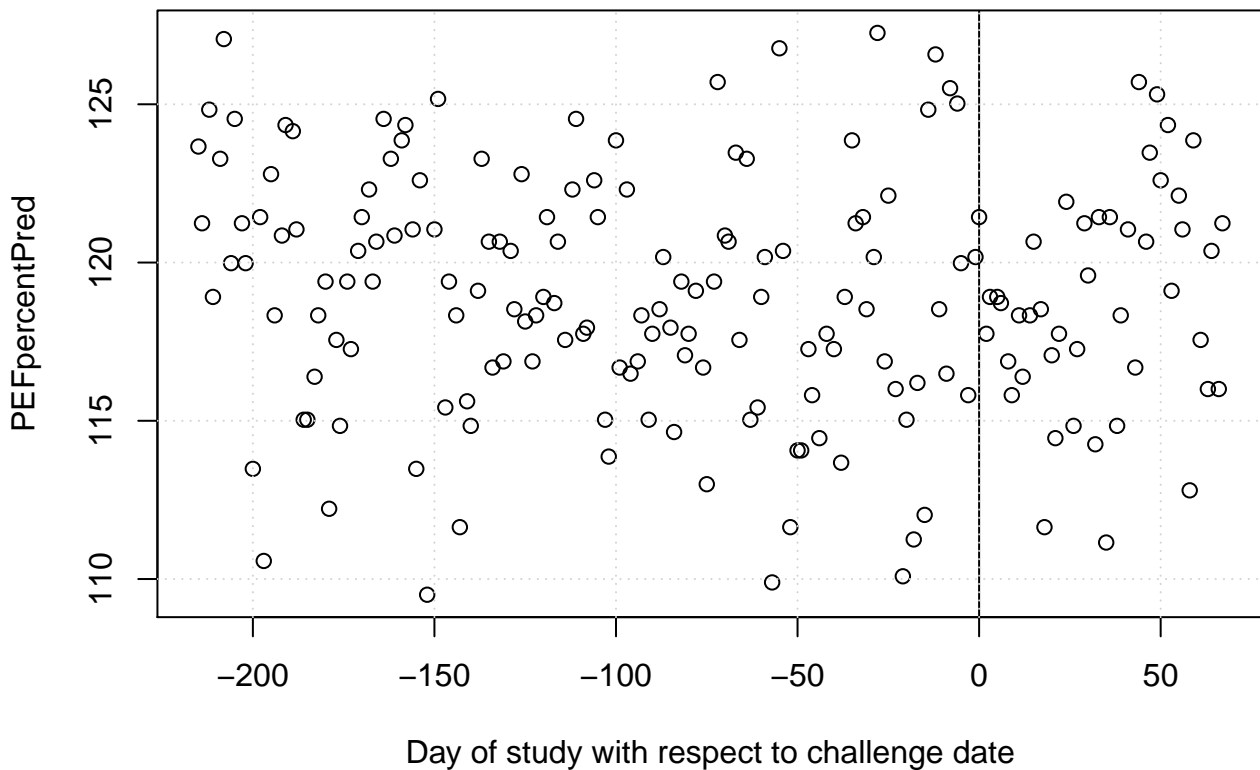



# P07H

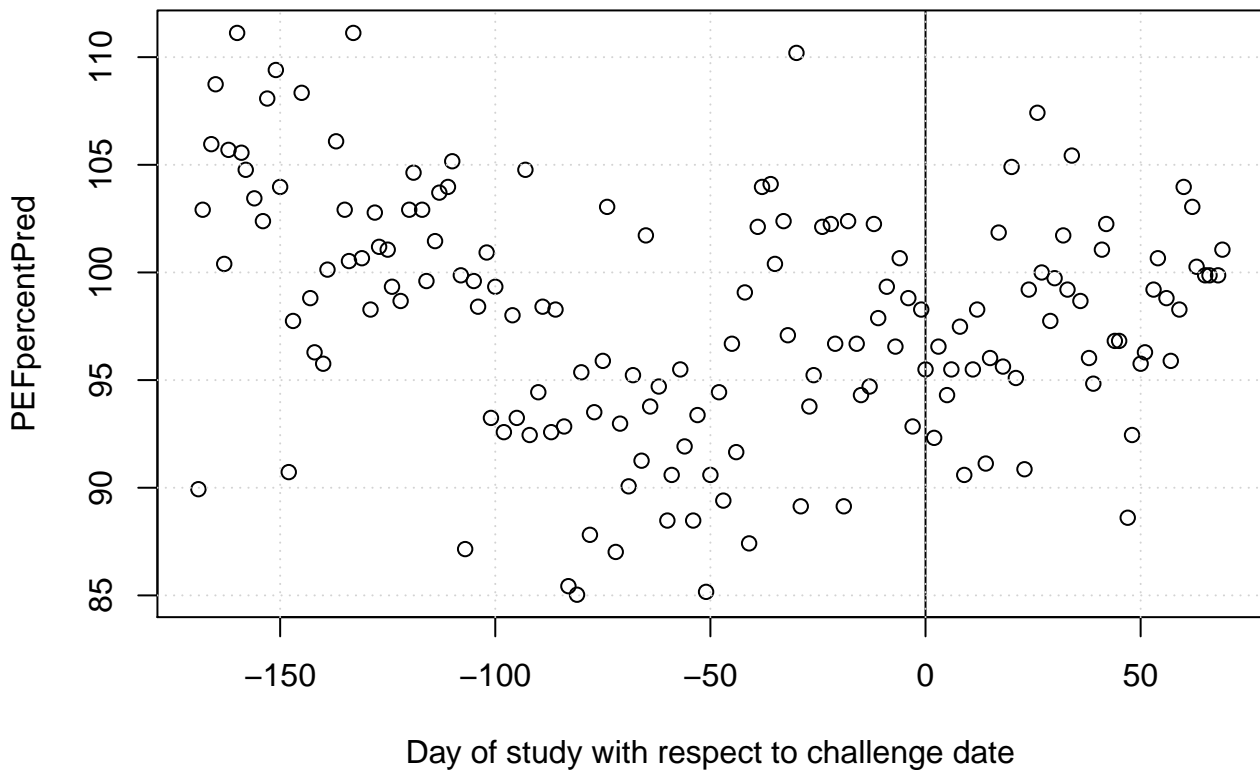

# P08H

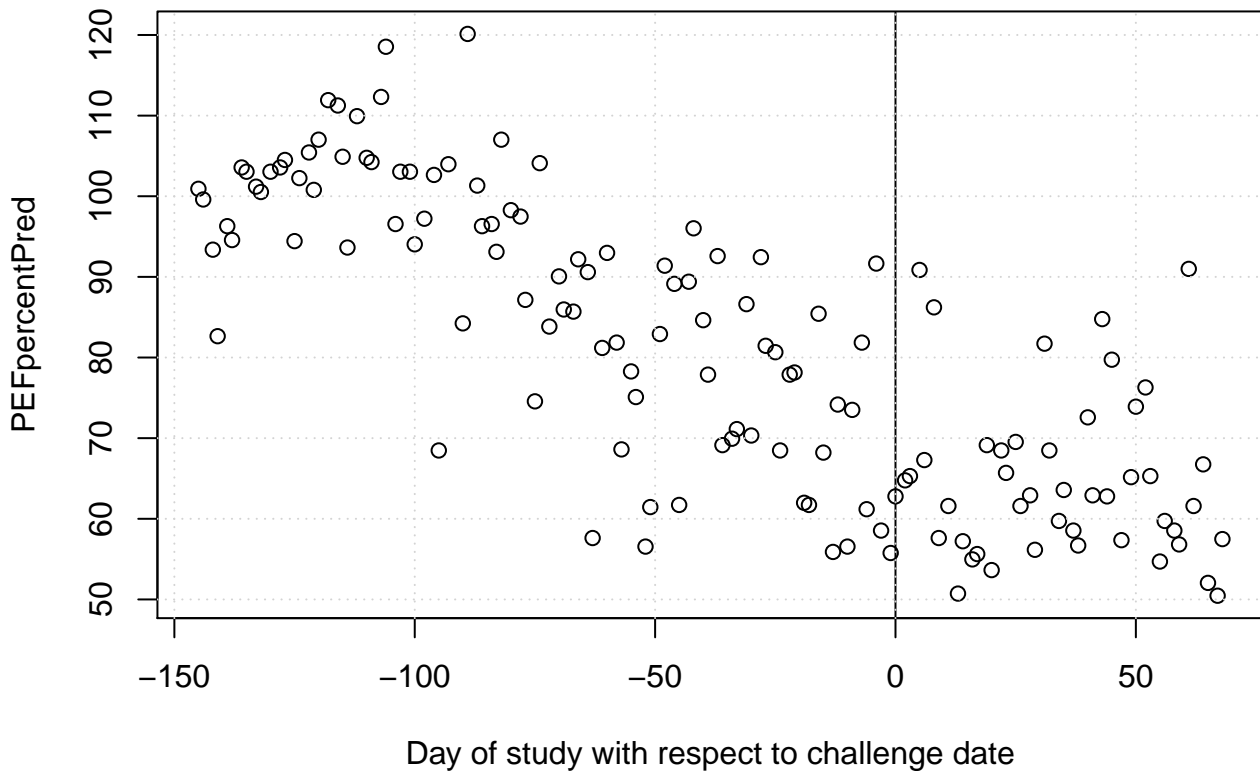

# P09H

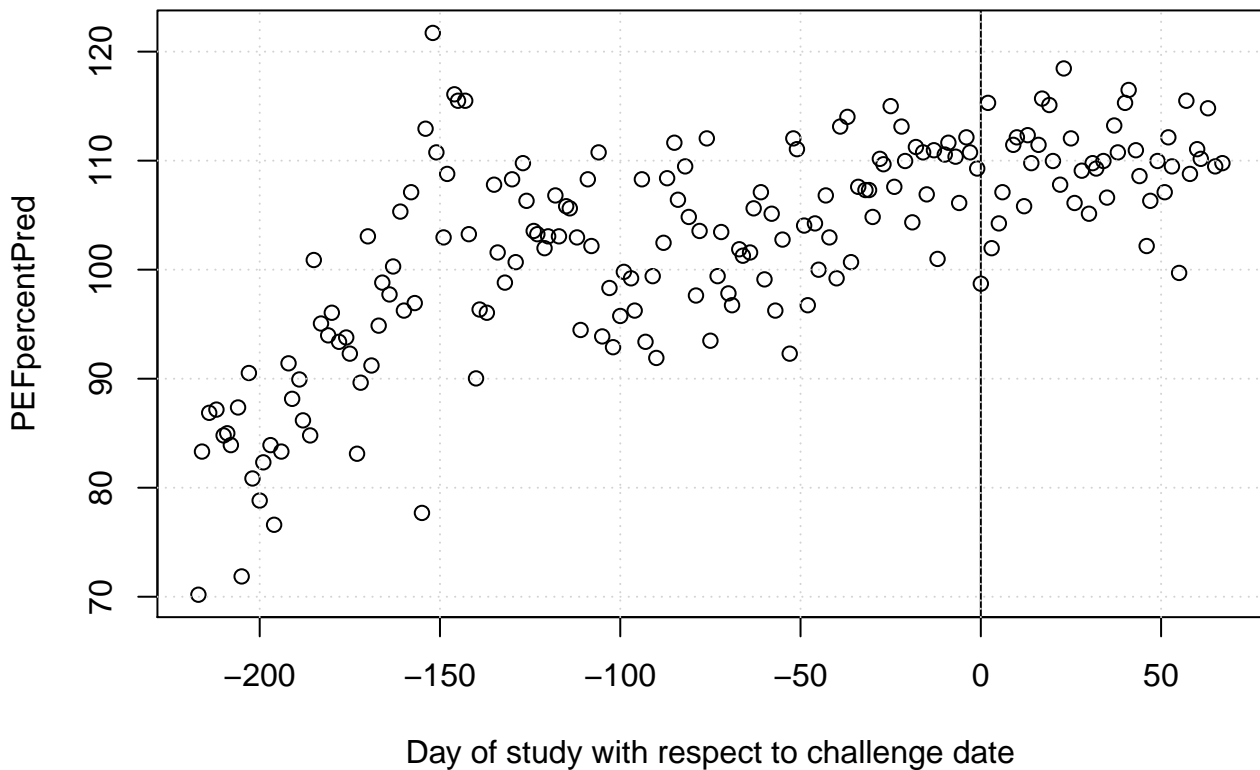

# P11H

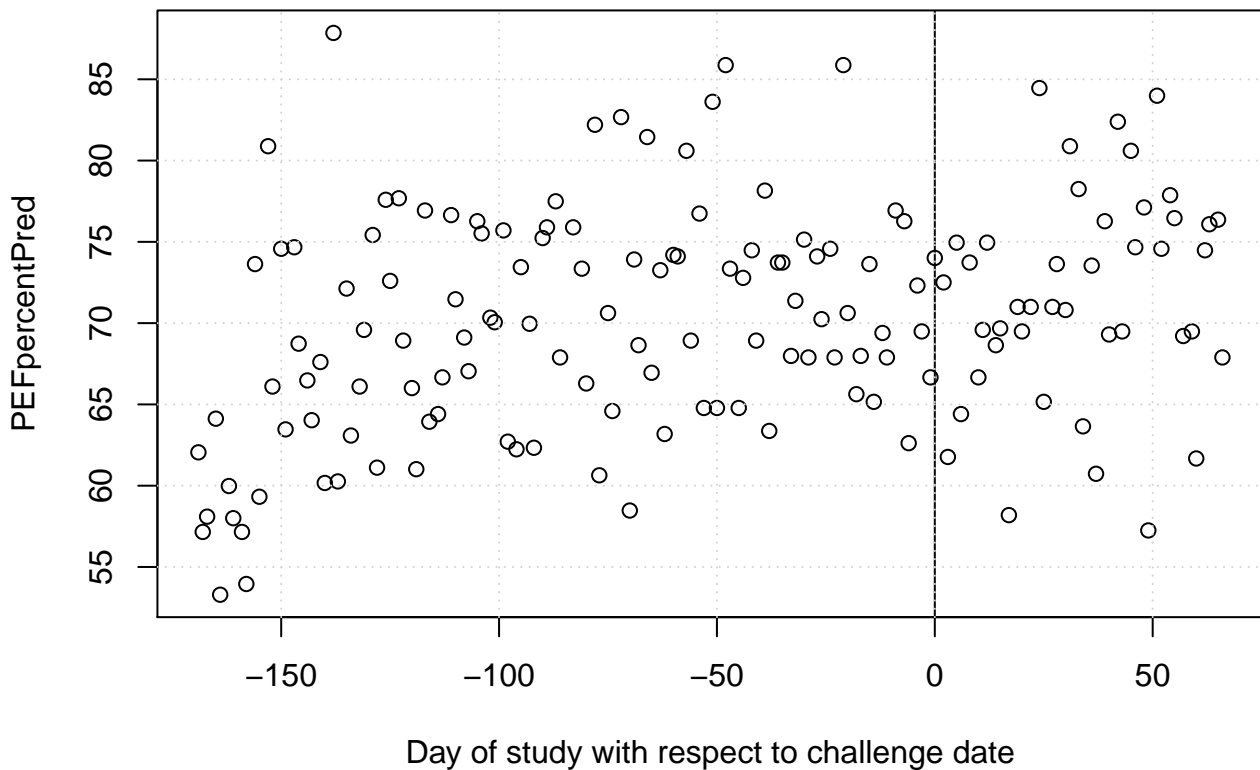

# P12H

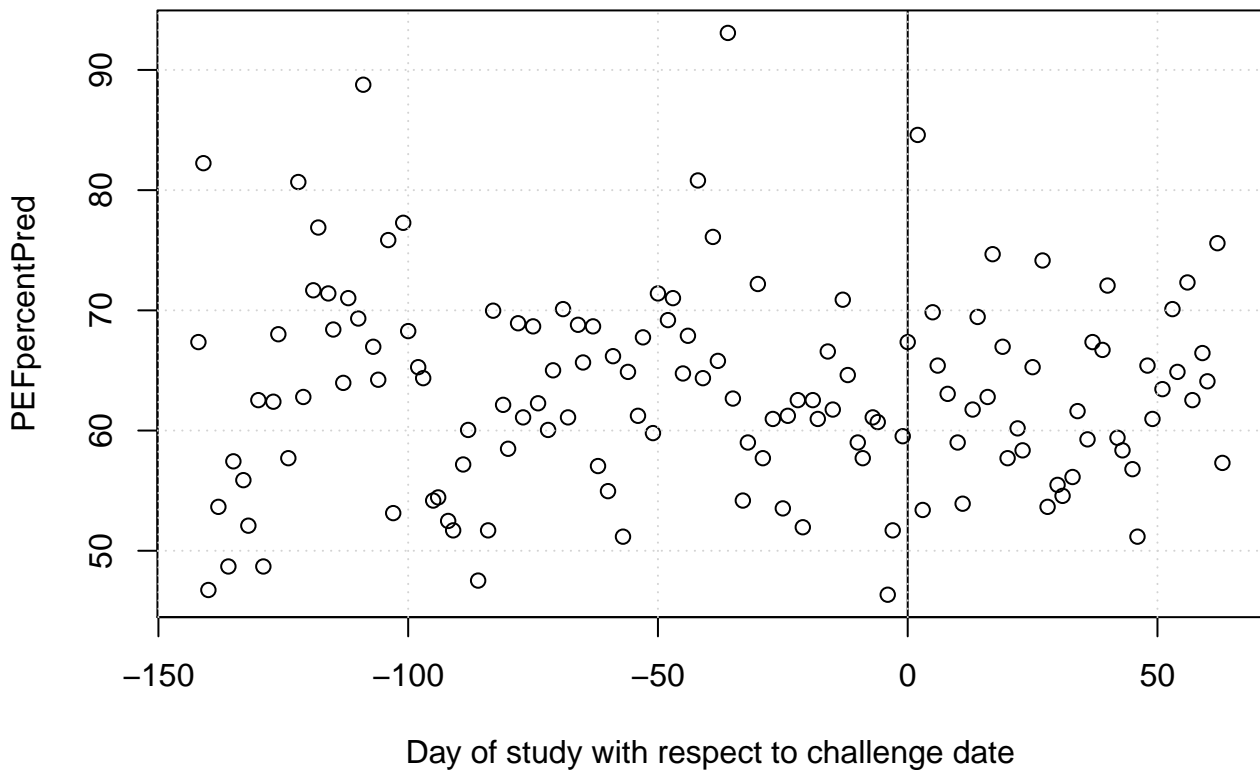

# P13H

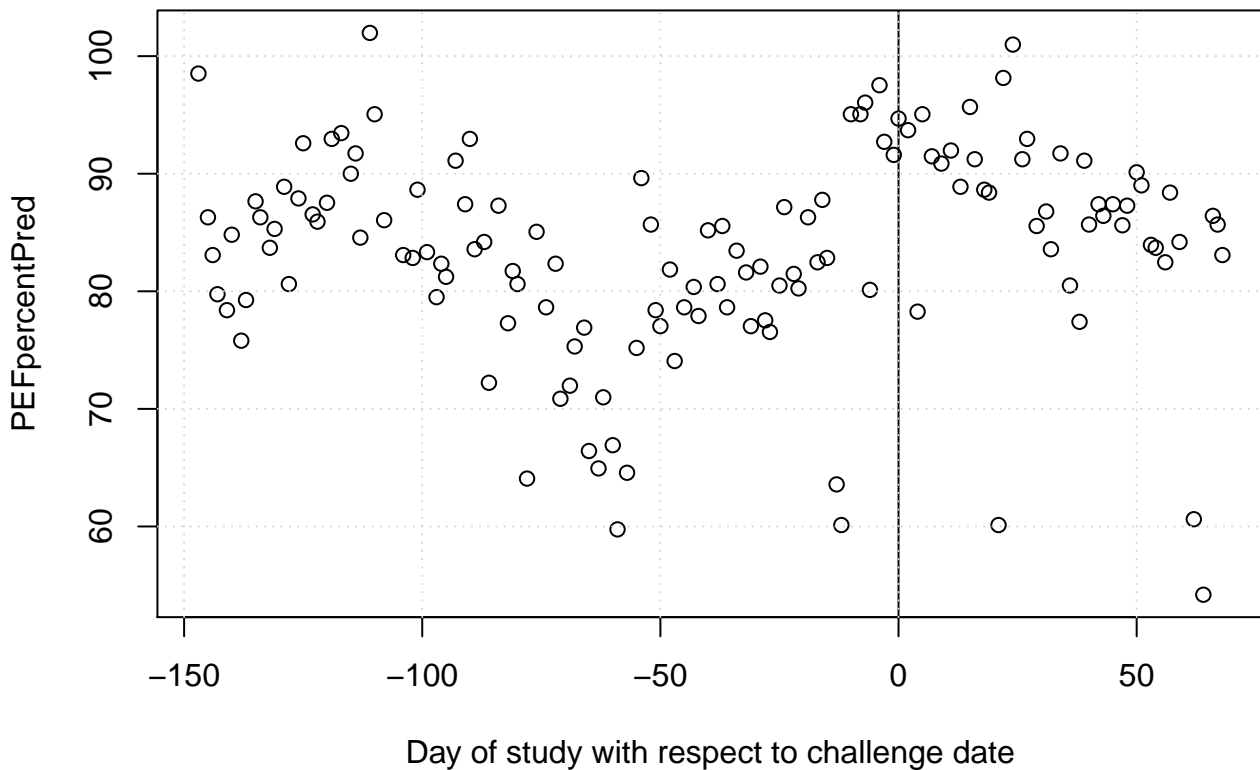

# P14H

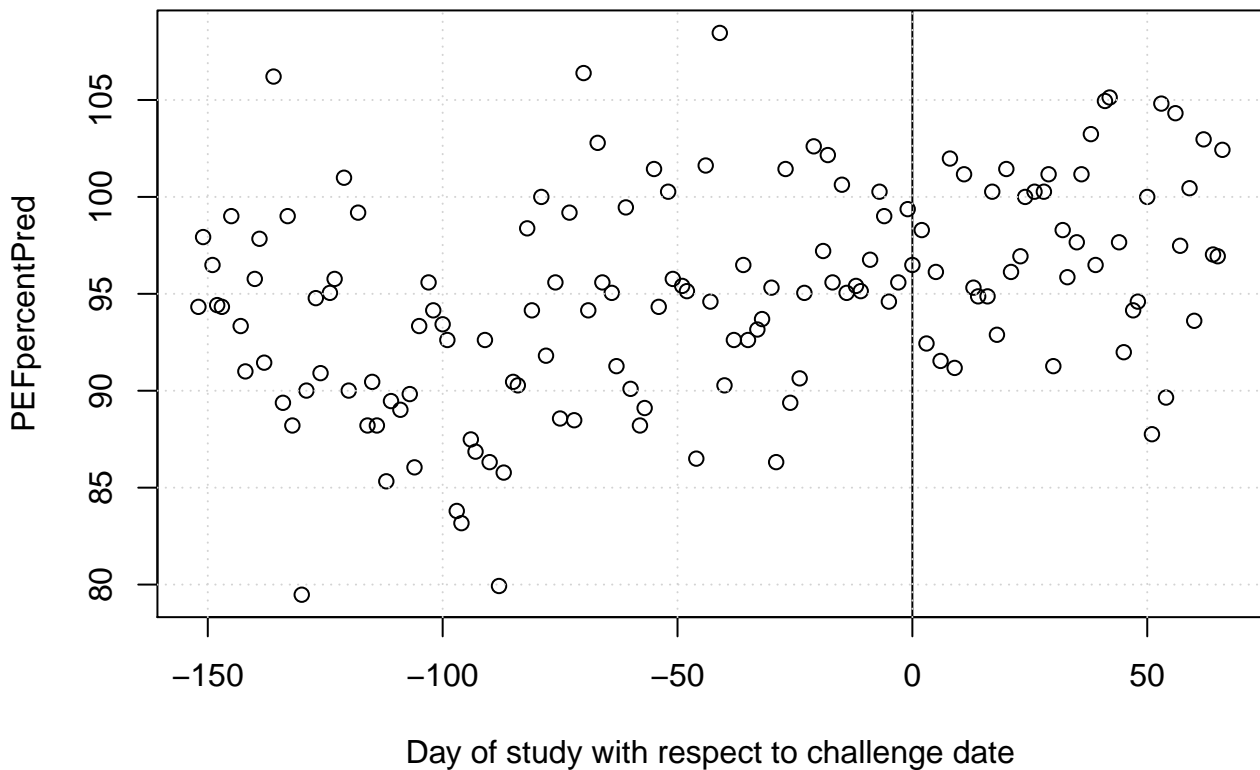

# P15H

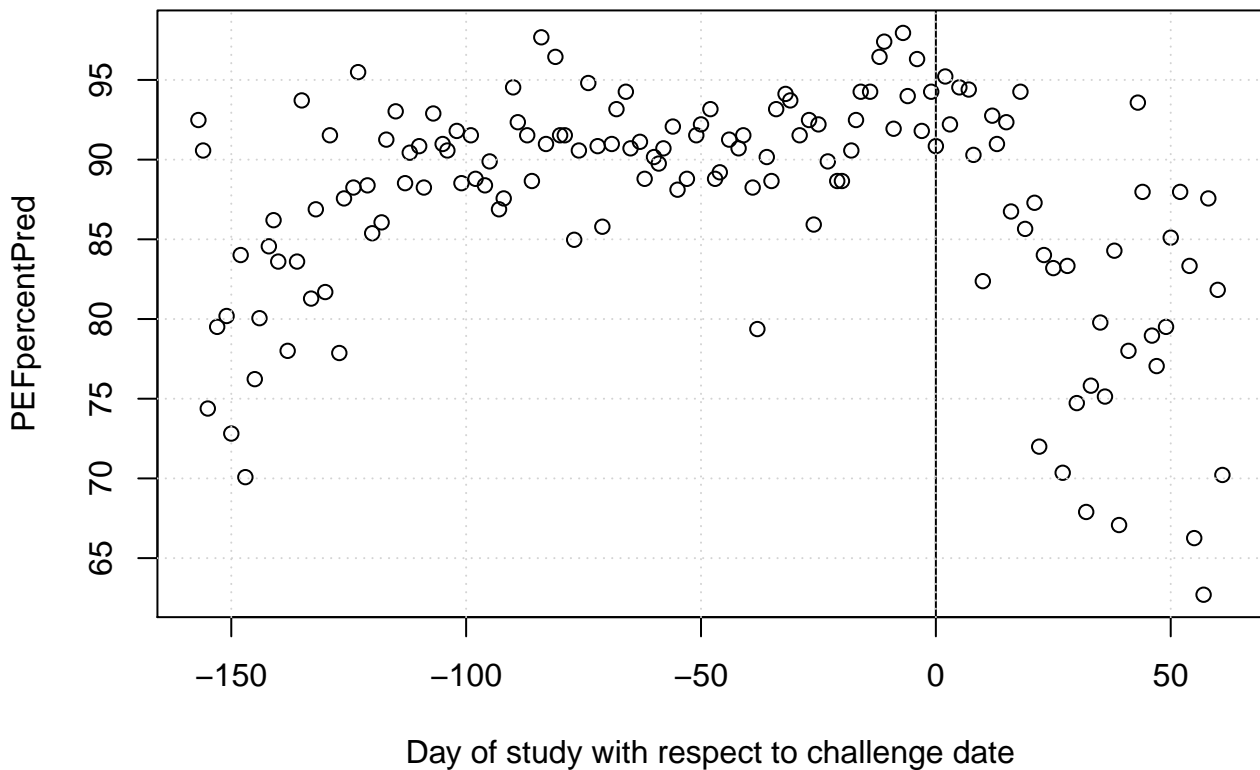



# P01A

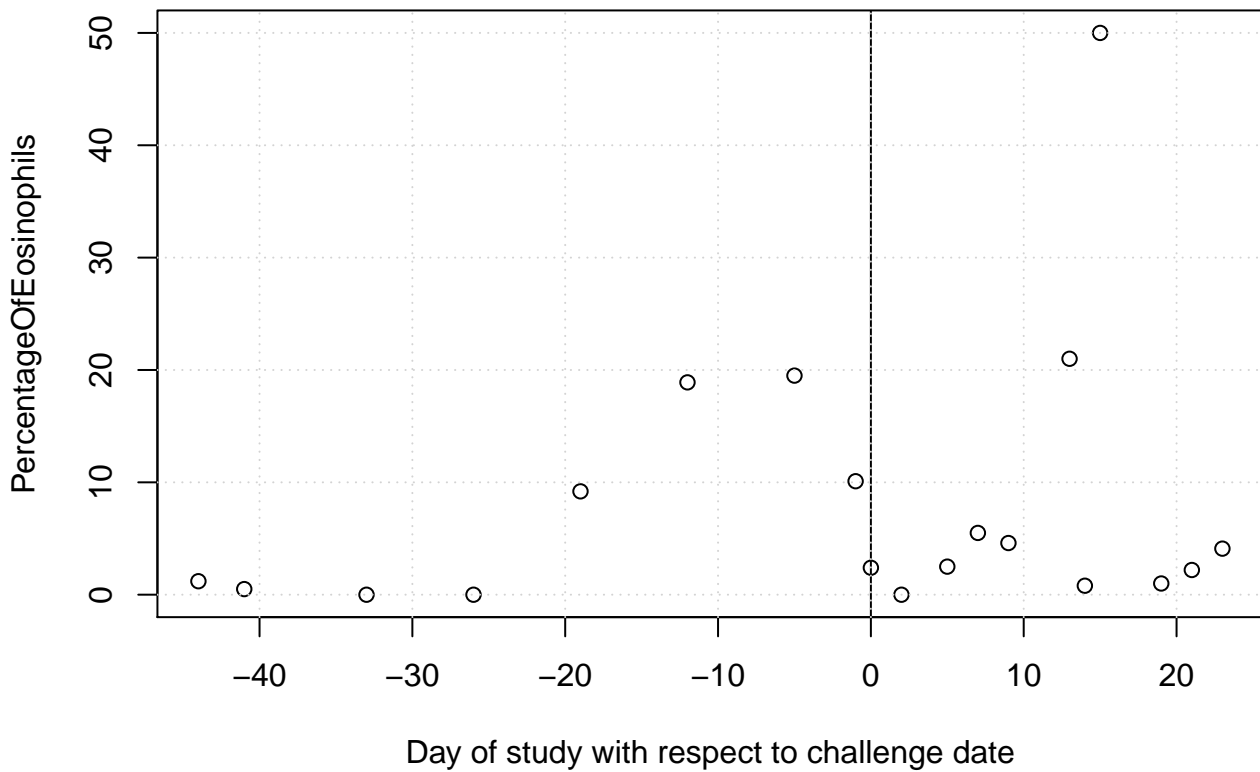

## P02A

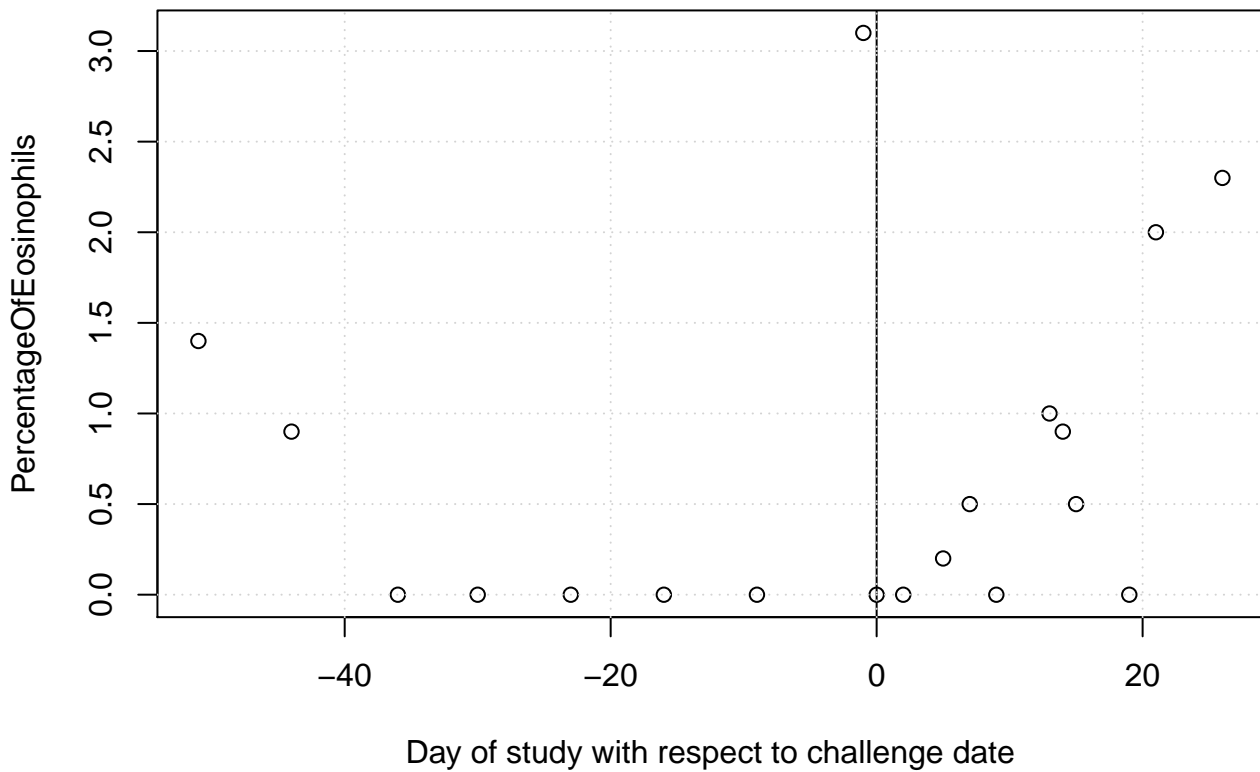

# P04A

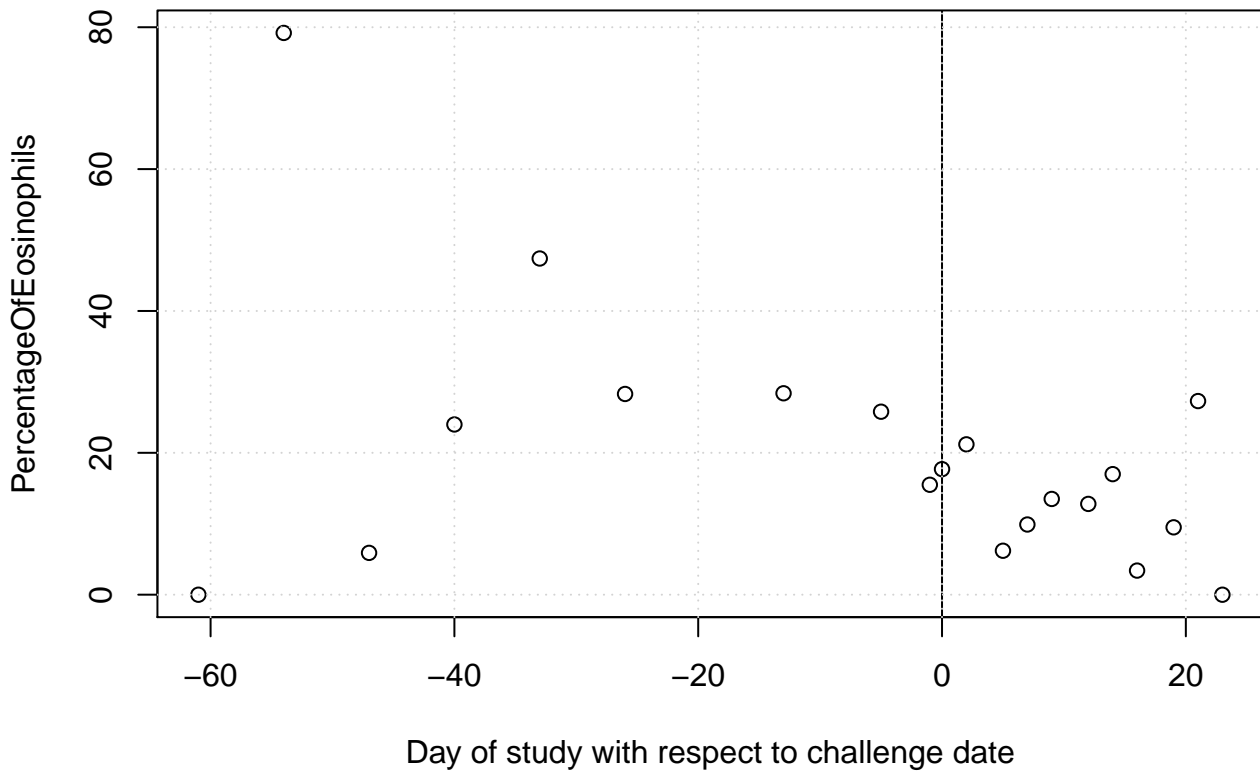

# P05A

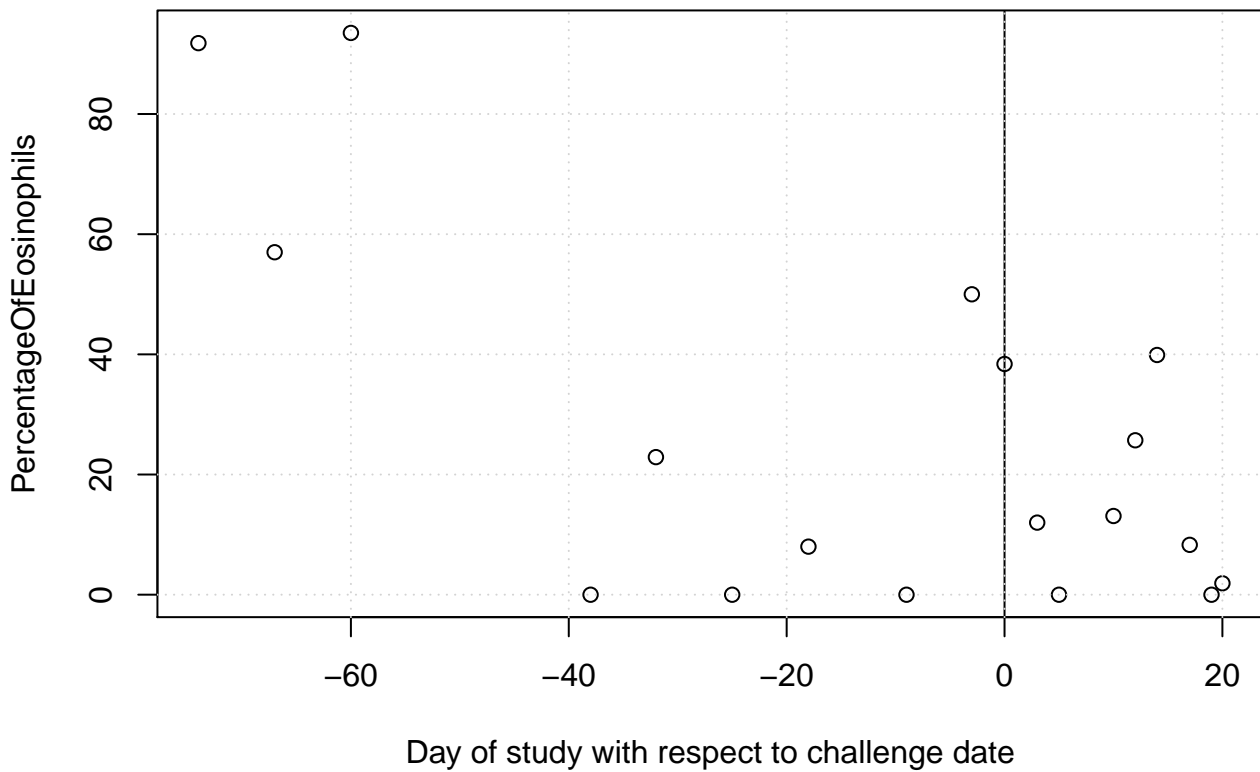

# P06A

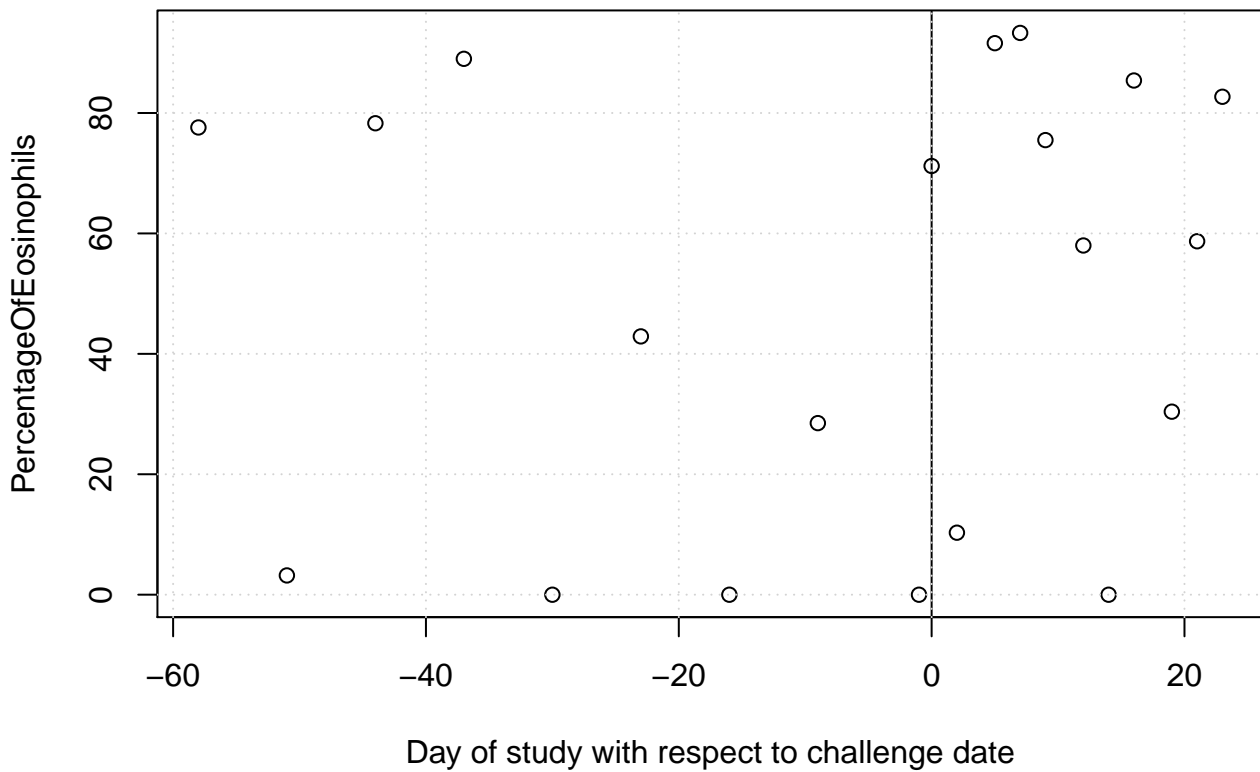

# P07A

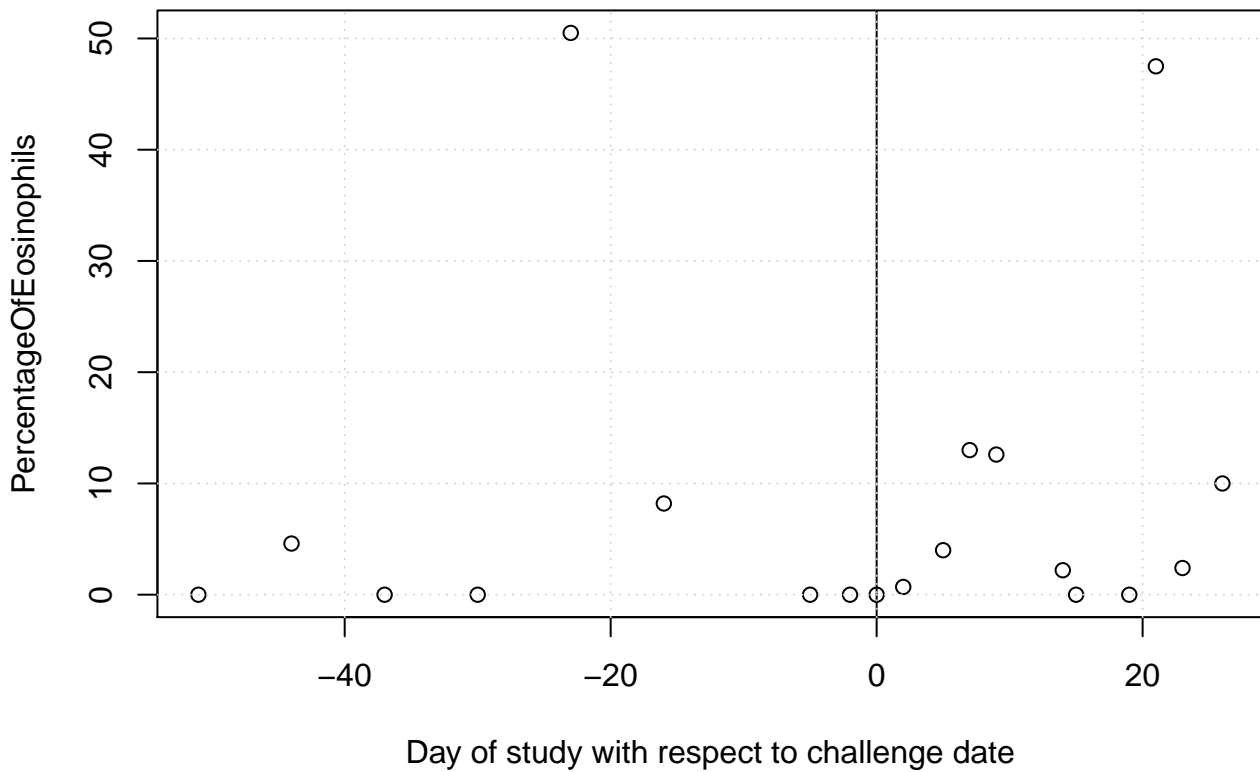

**P08A**

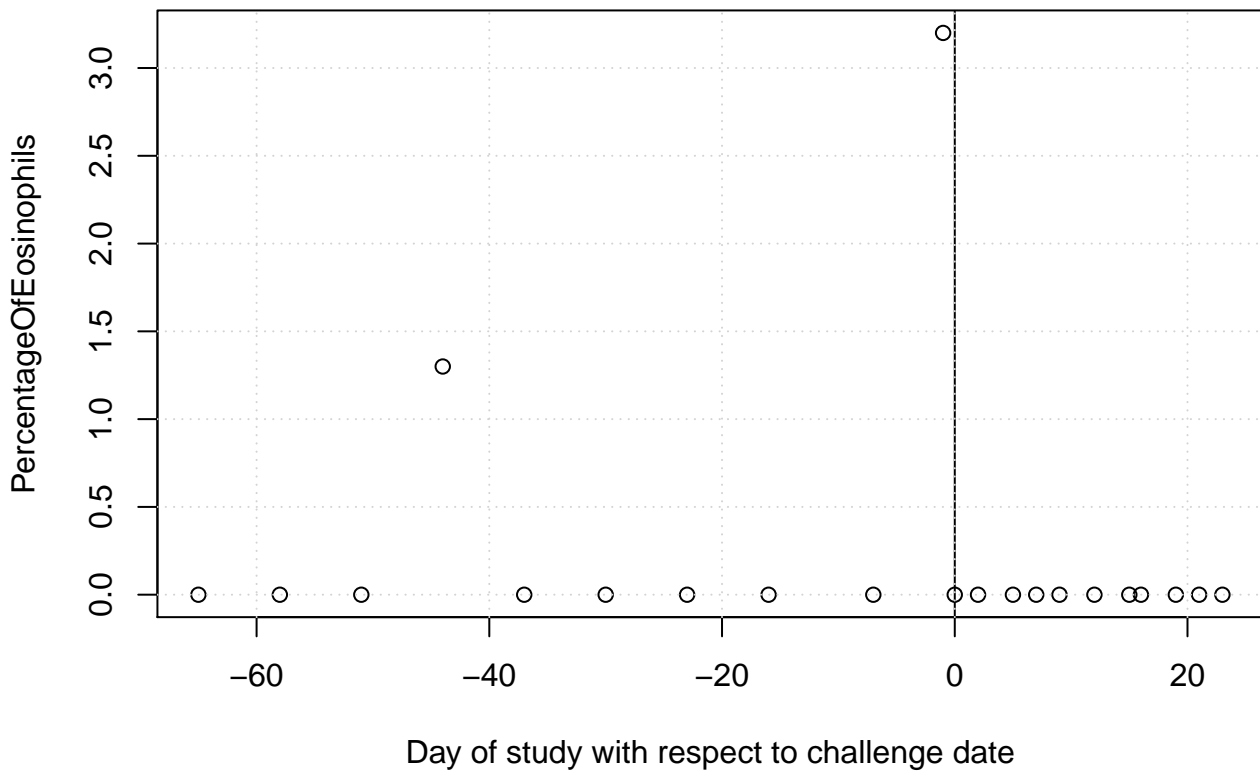

**P09A**

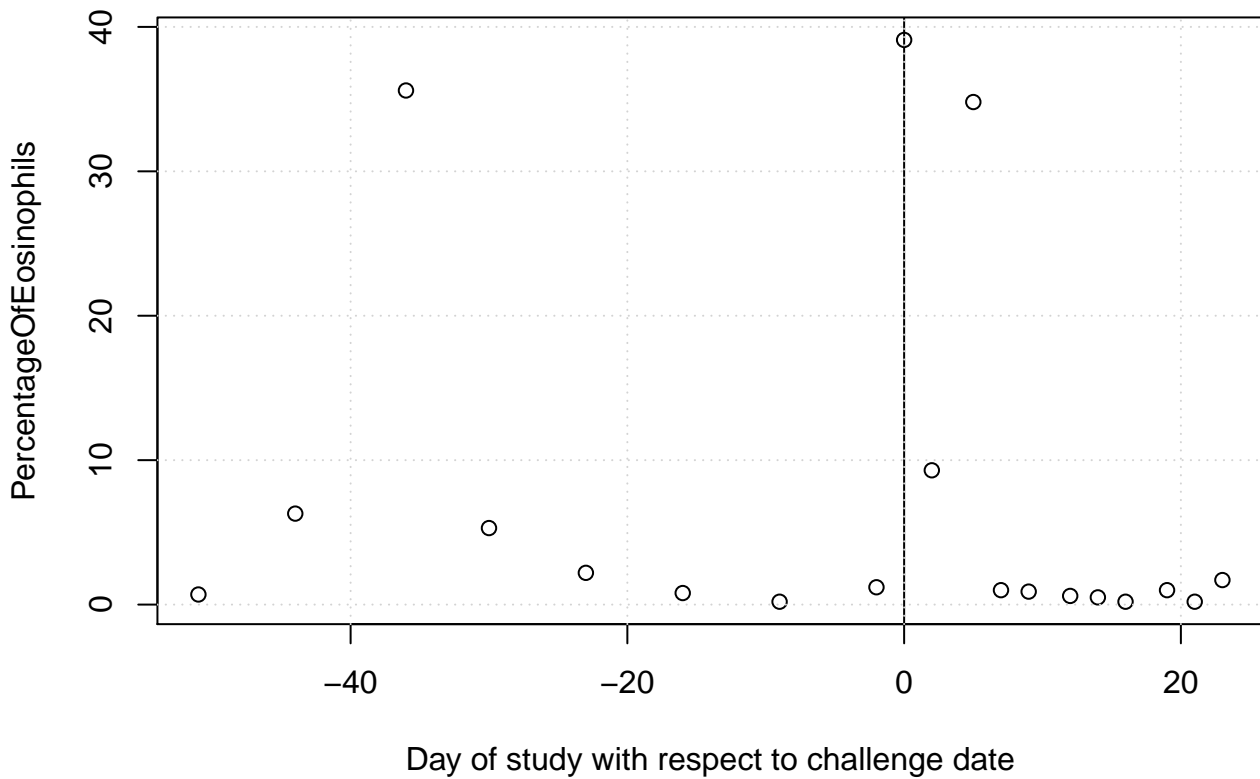



# P10A

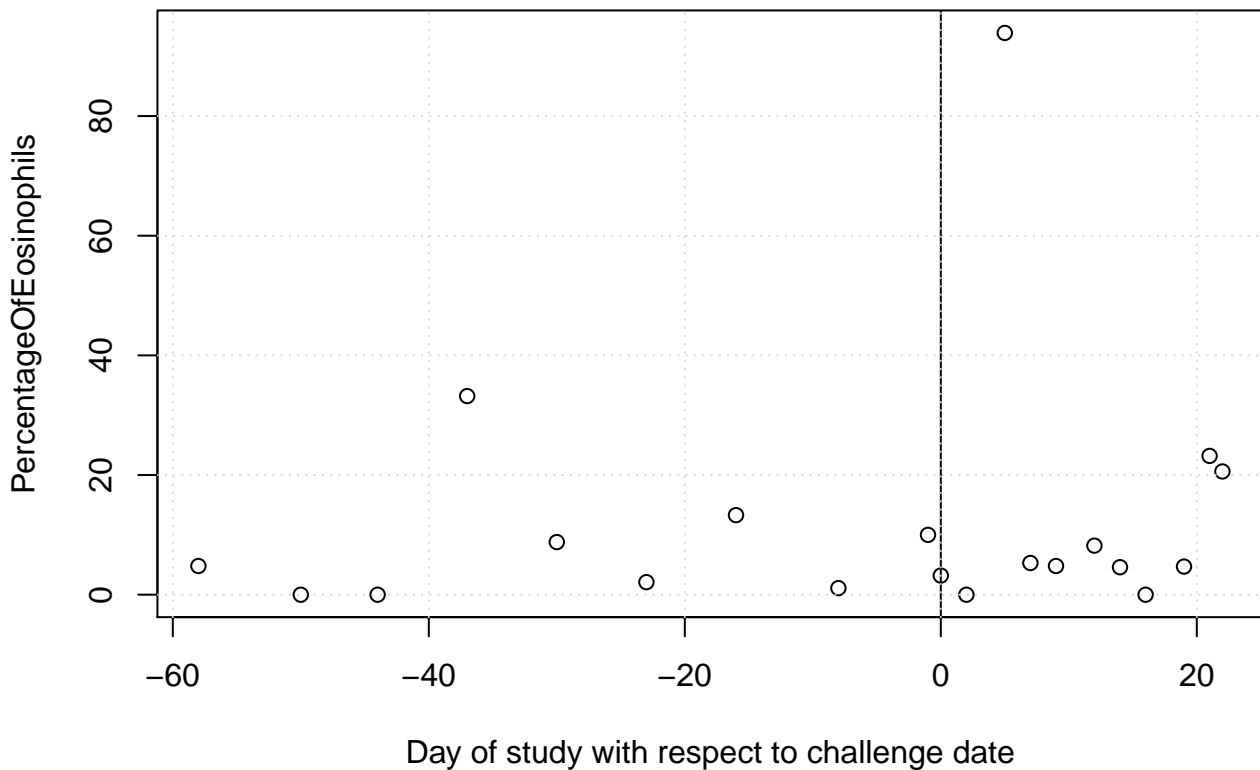

# P11A

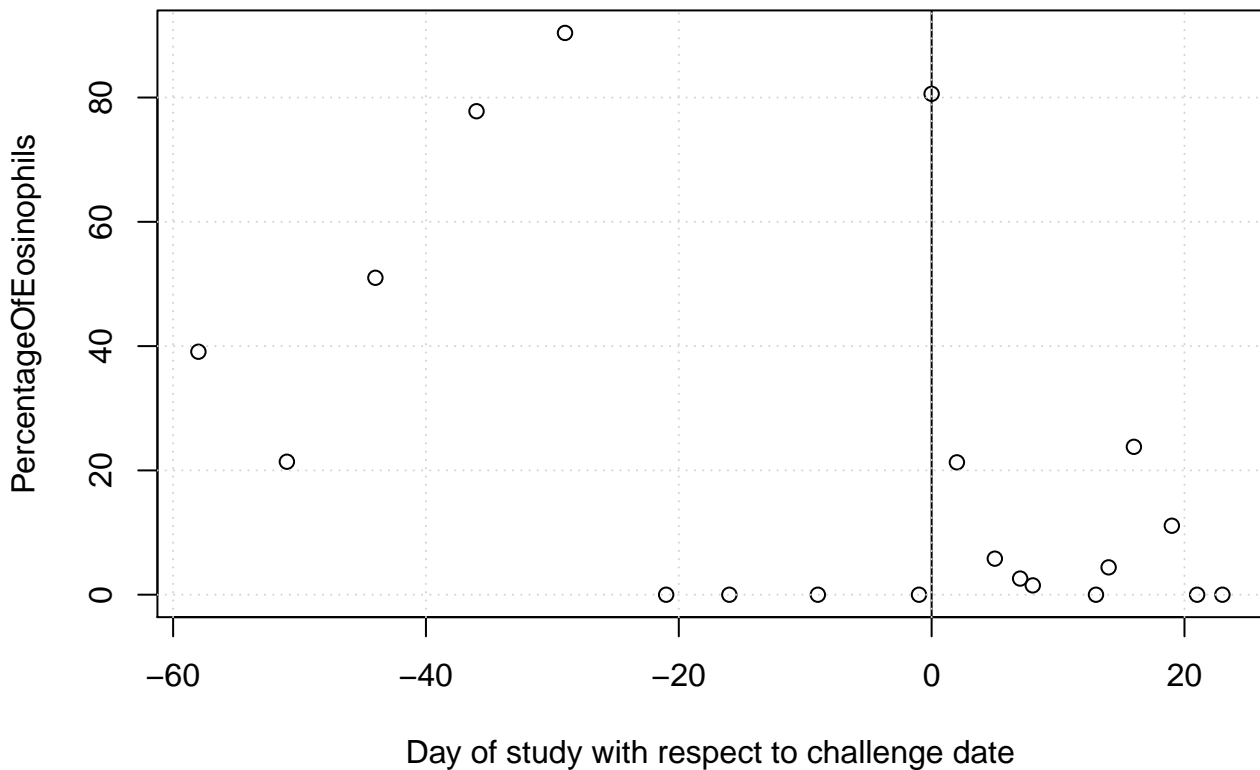

## P12A

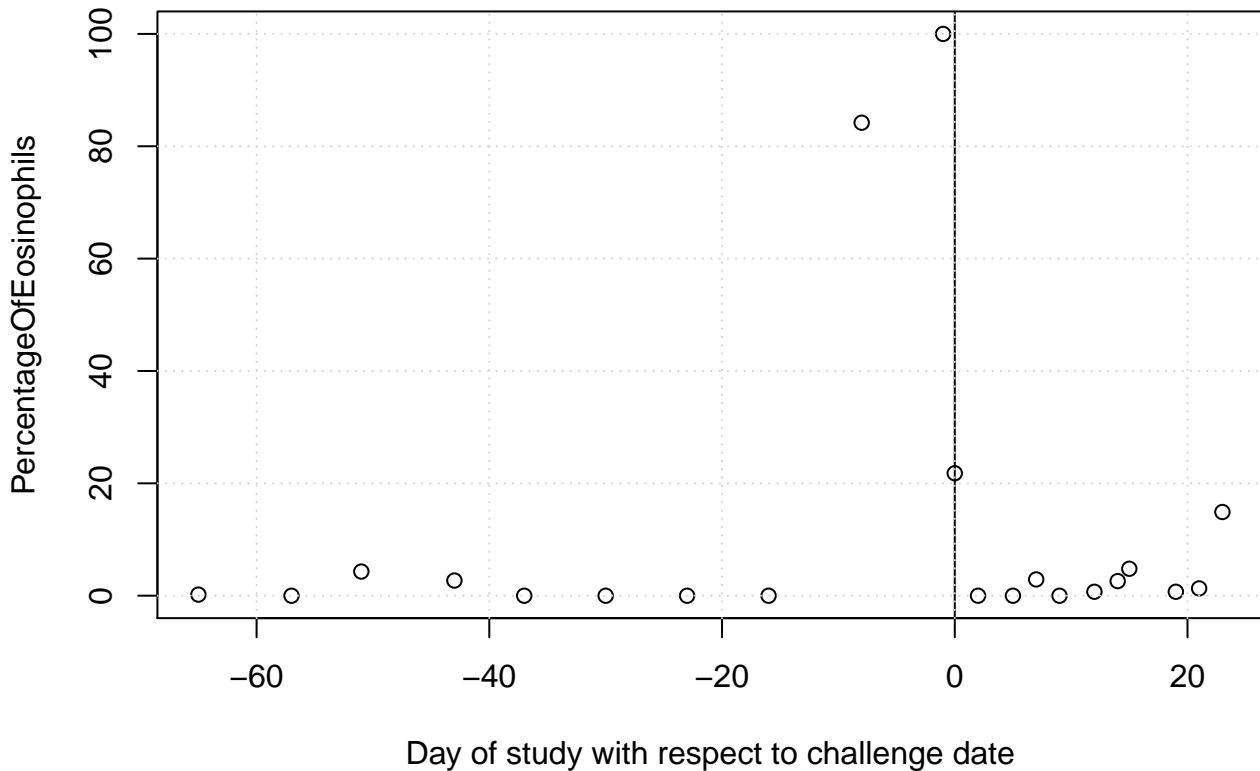

# P13A

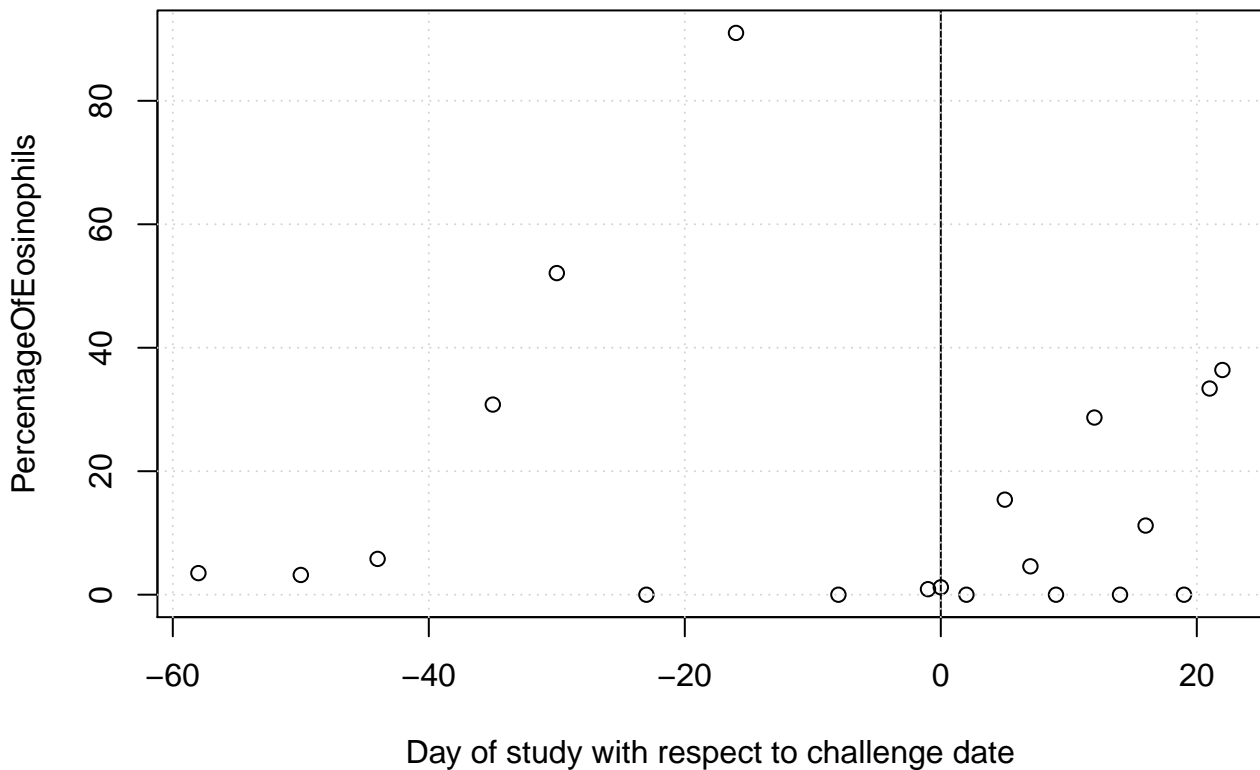

# P01H

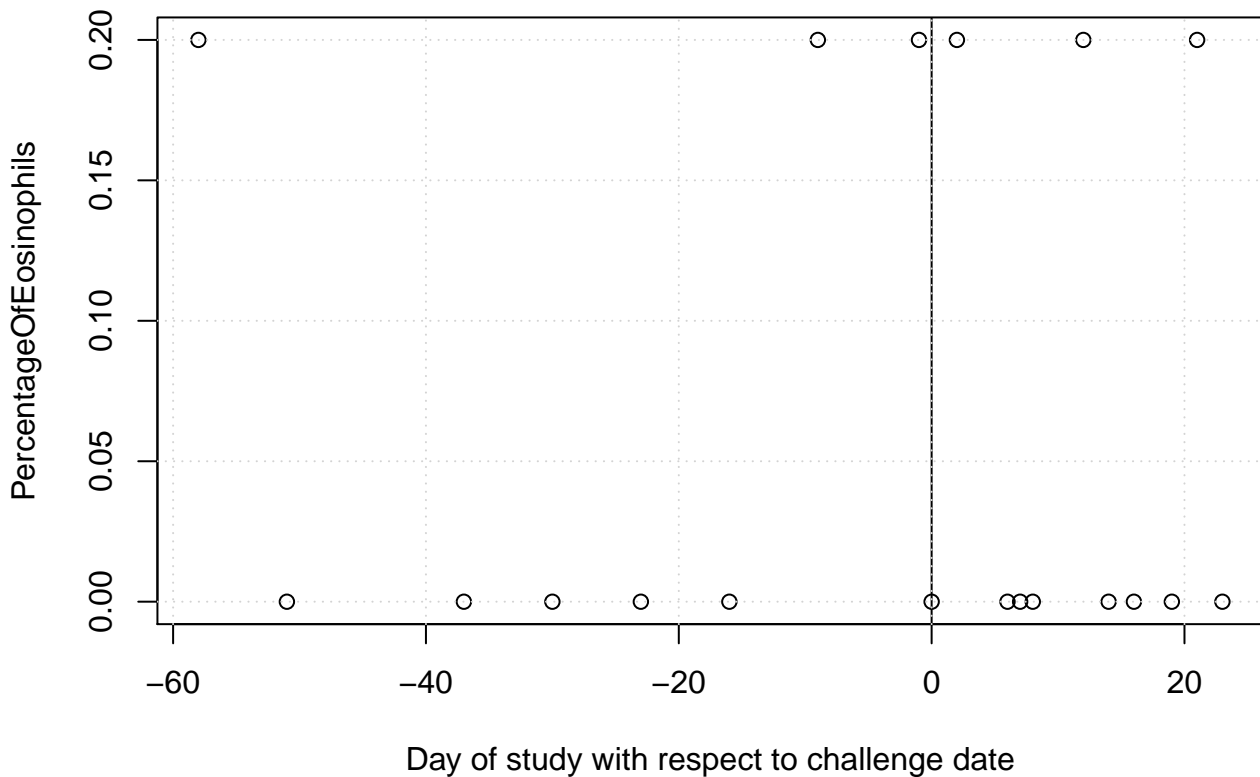

# P03H

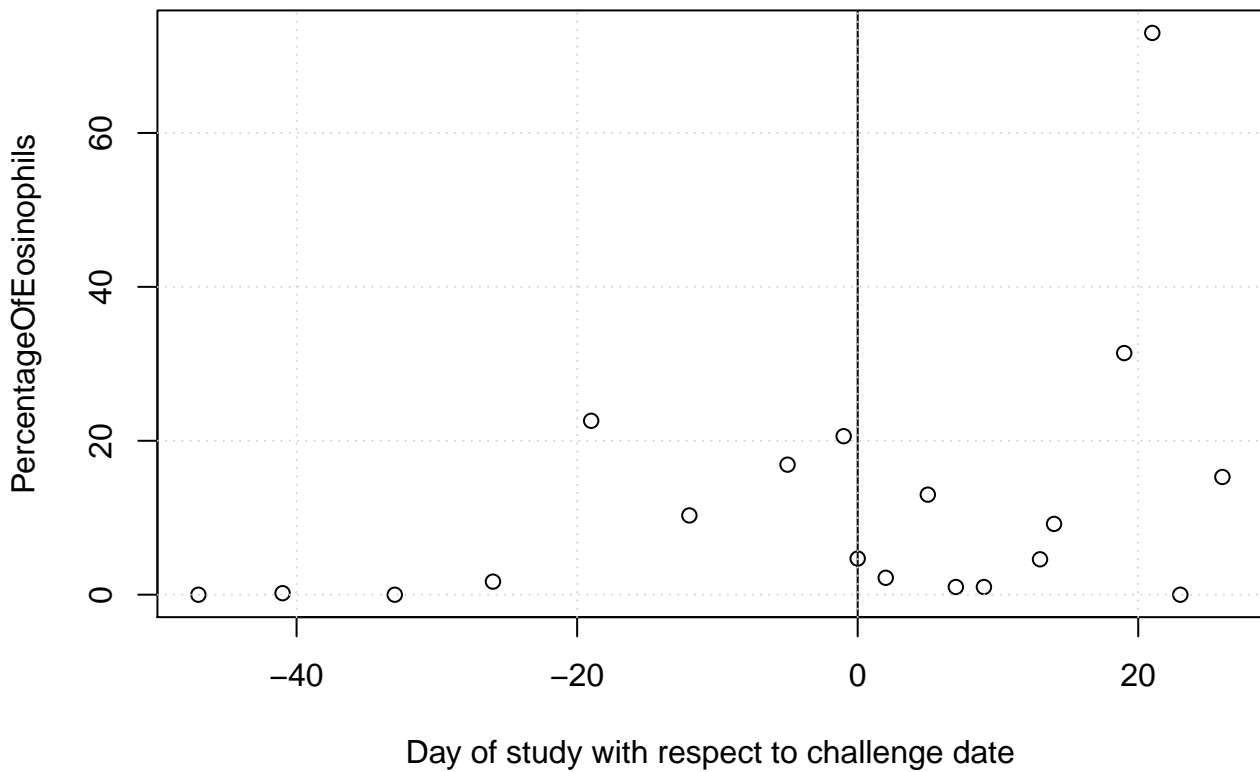

# P05H

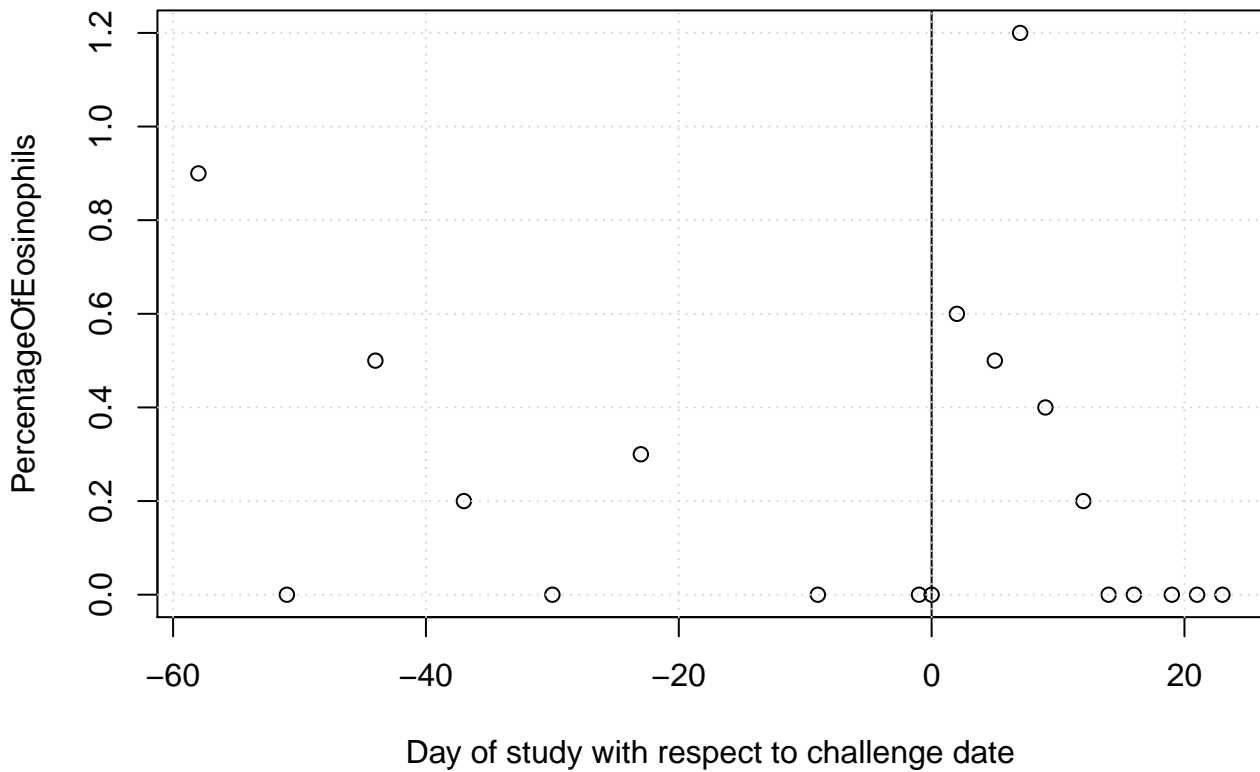

# P06H

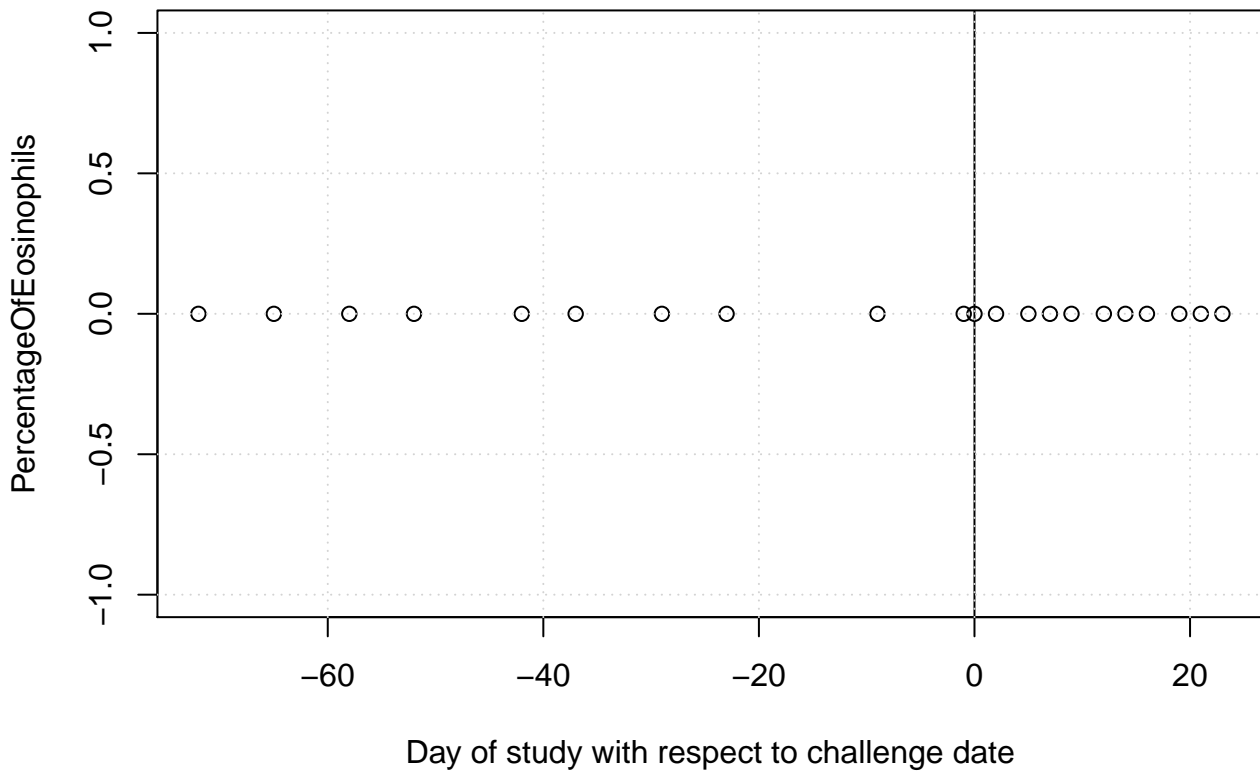



# P07H

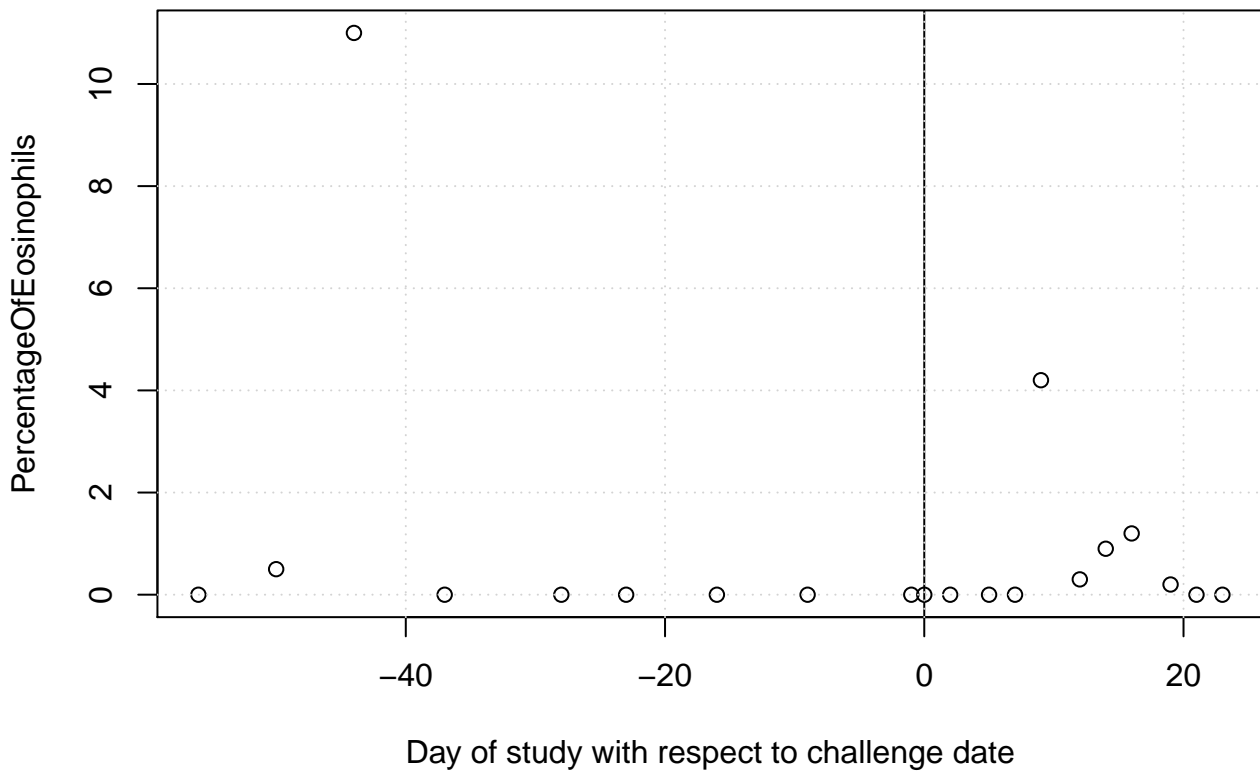

**P08H**

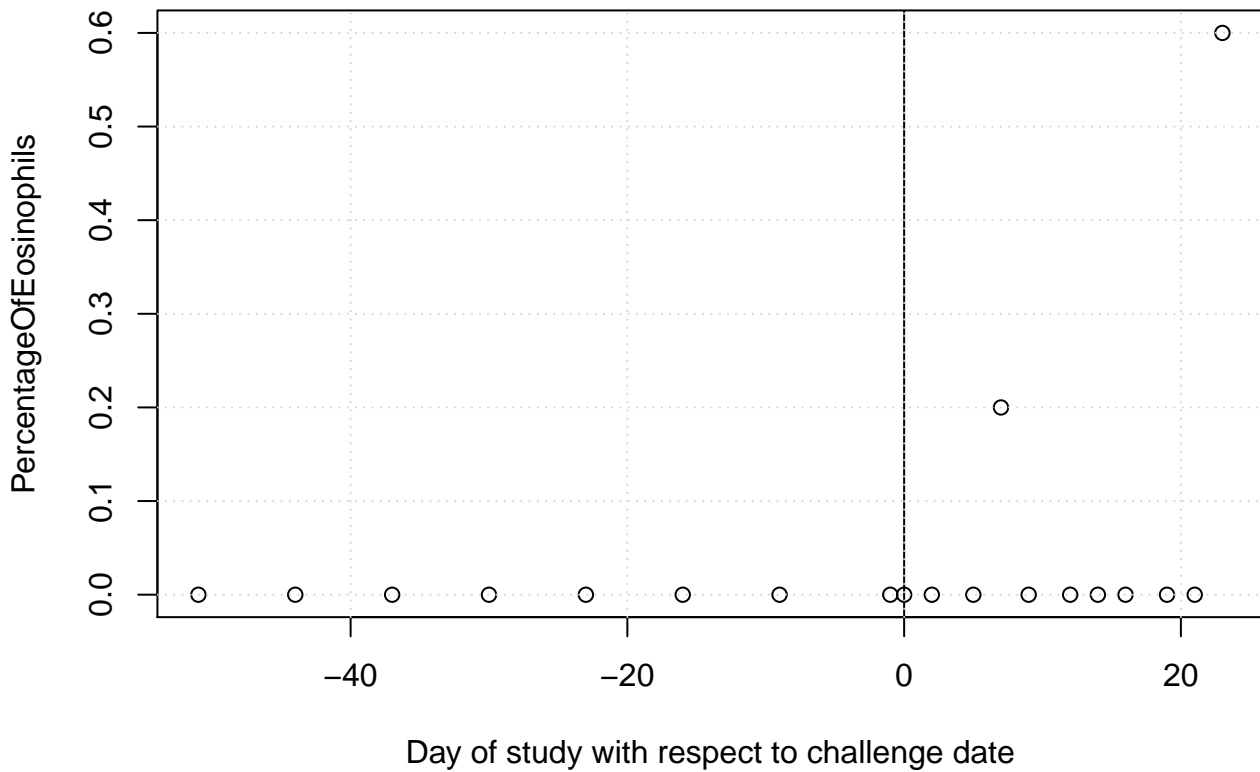

**P09H**

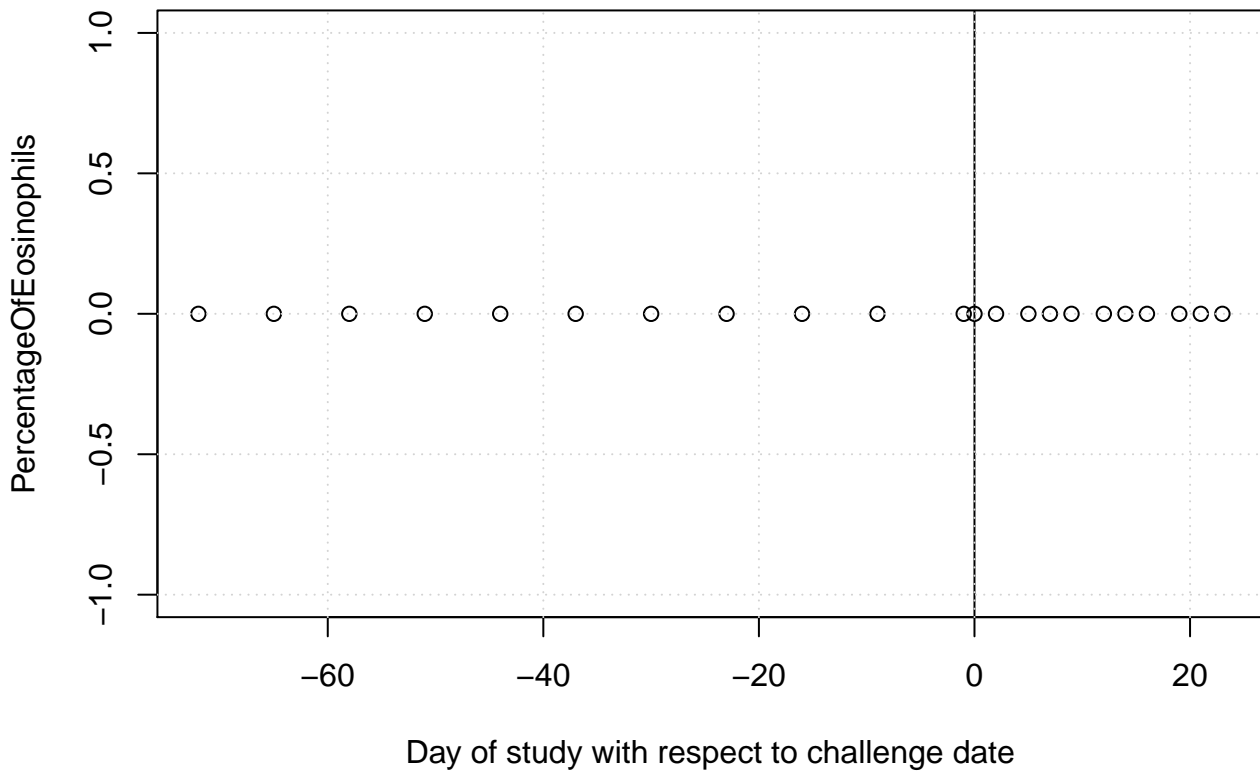

# P11H

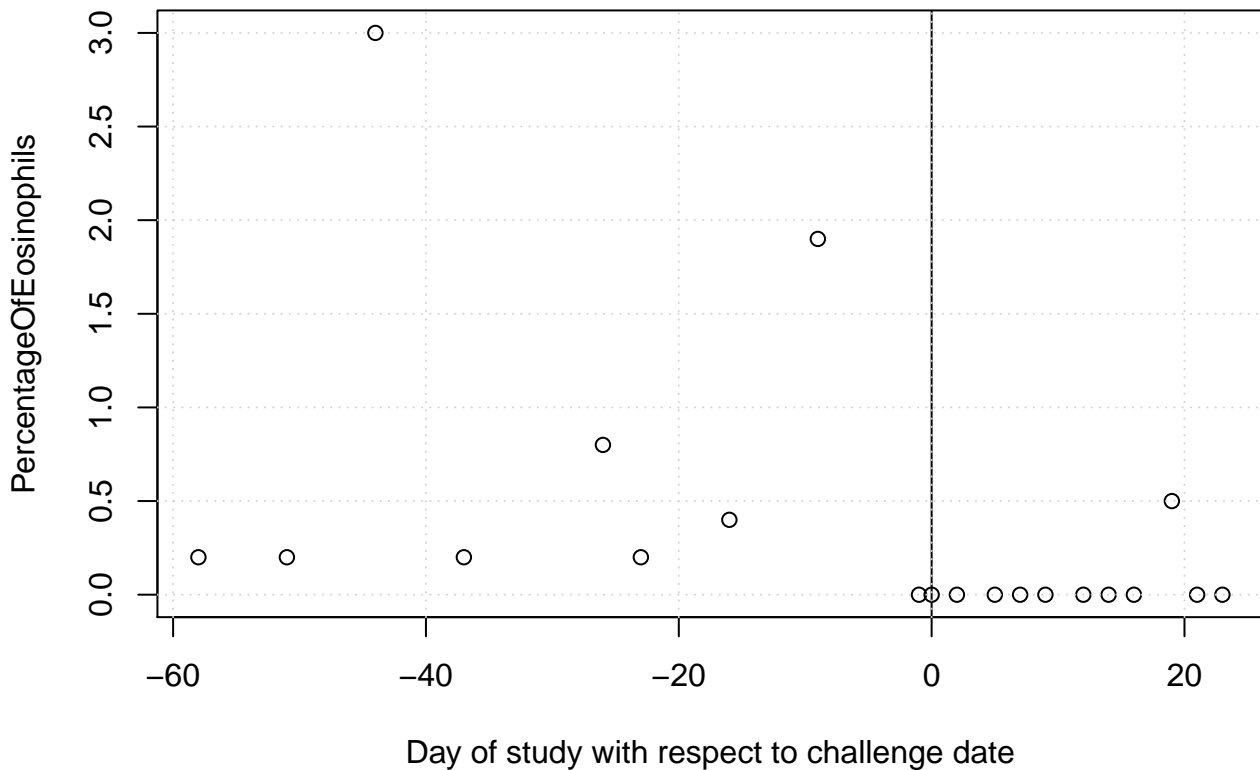

## P12H

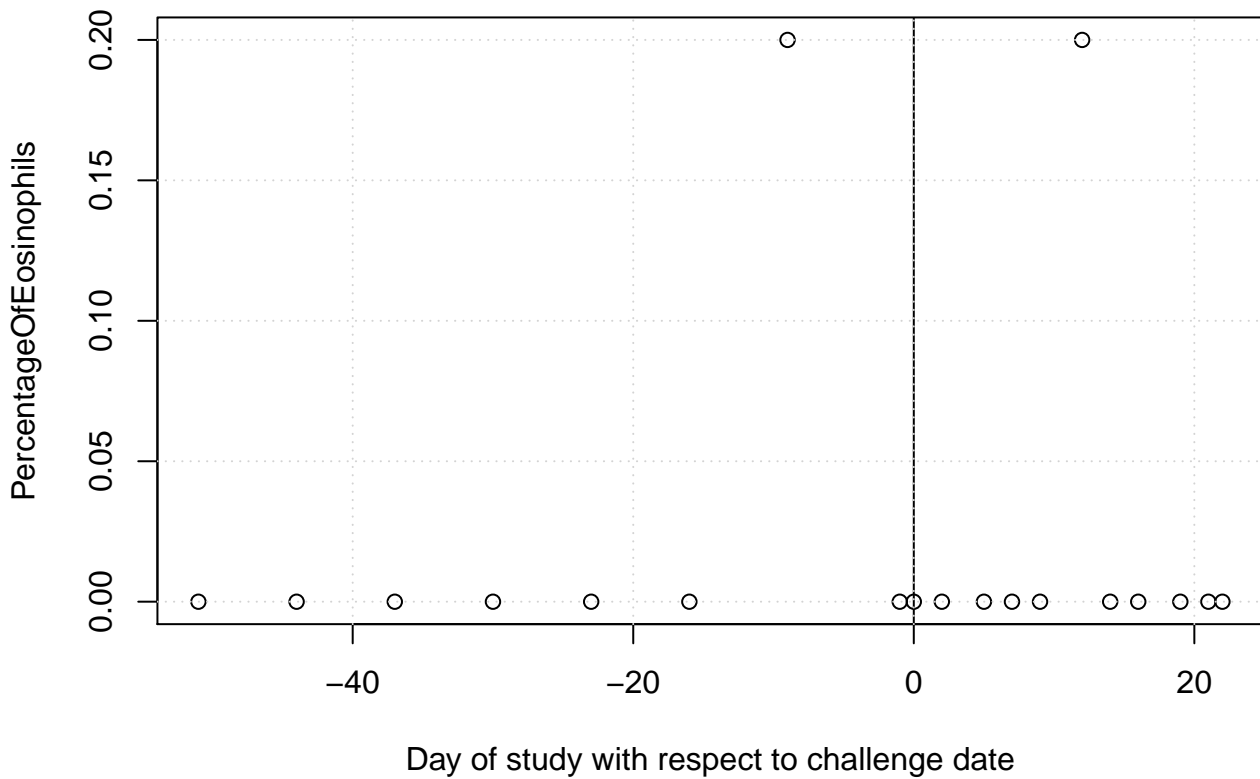

# P13H

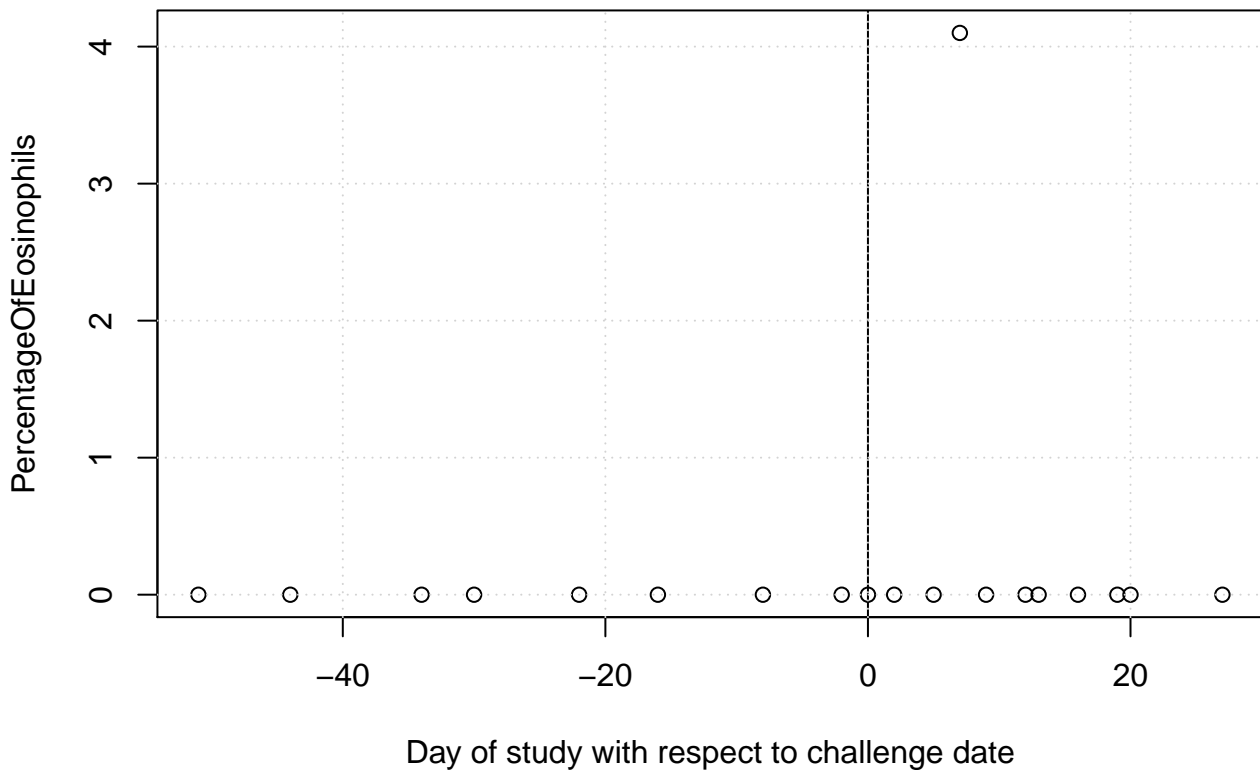

# P14H

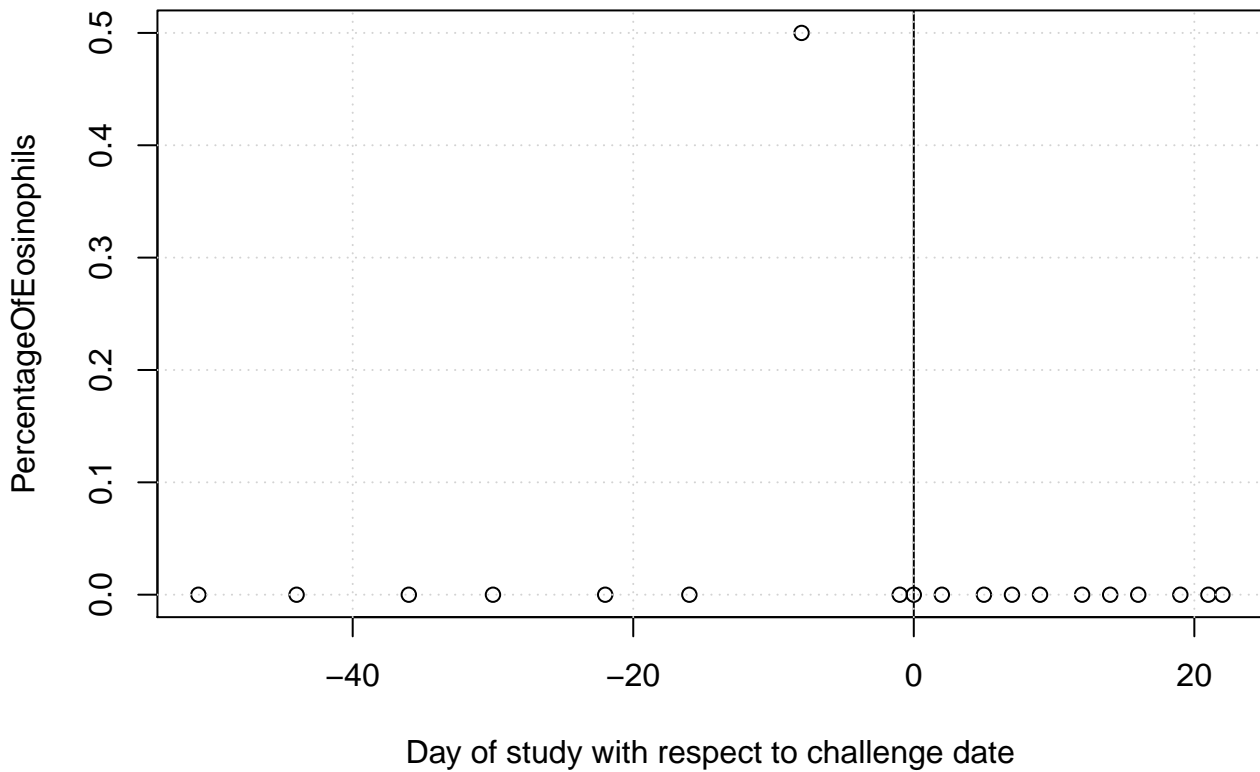

# P15H

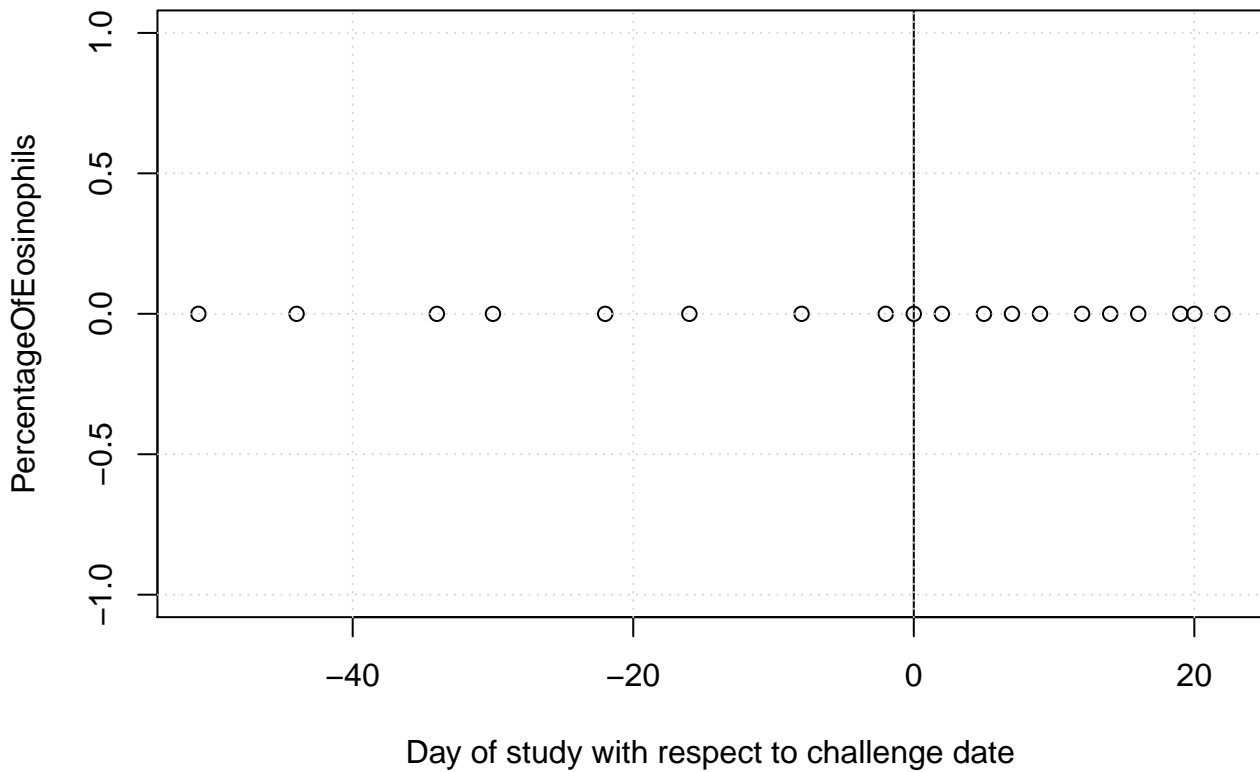



# P01A

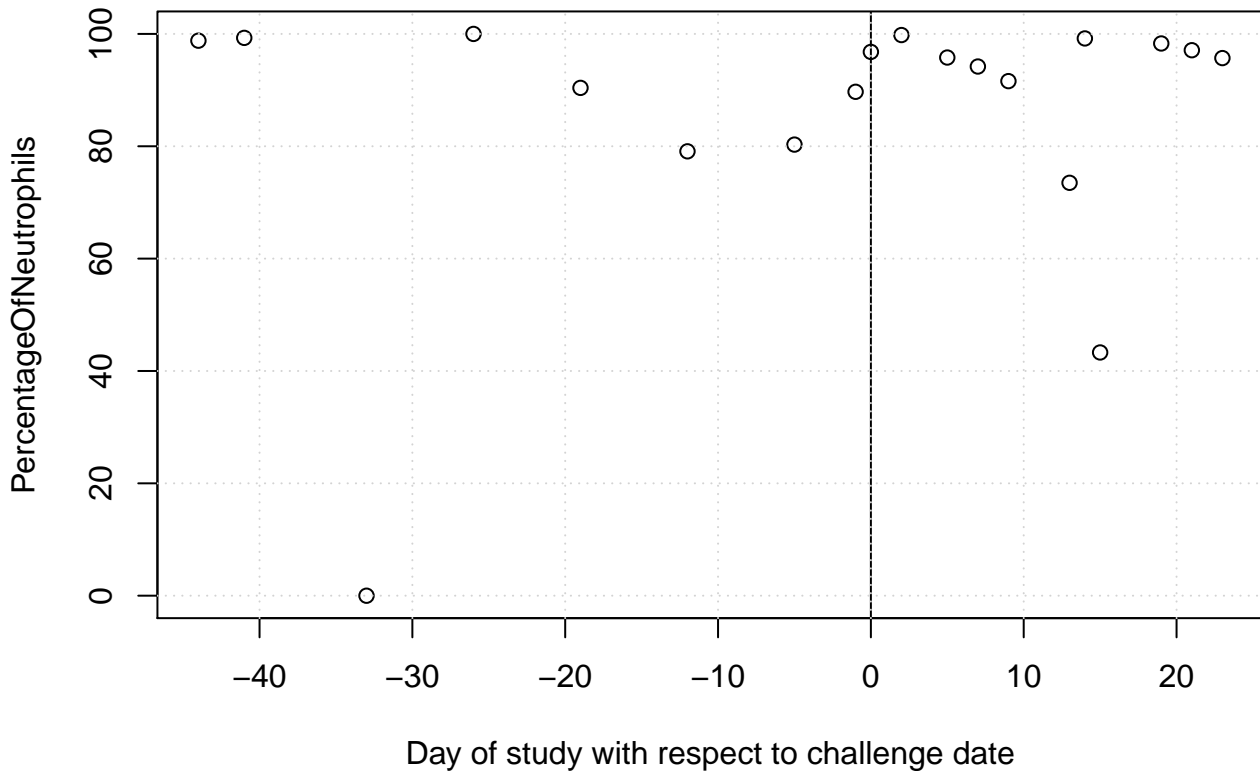

## P02A

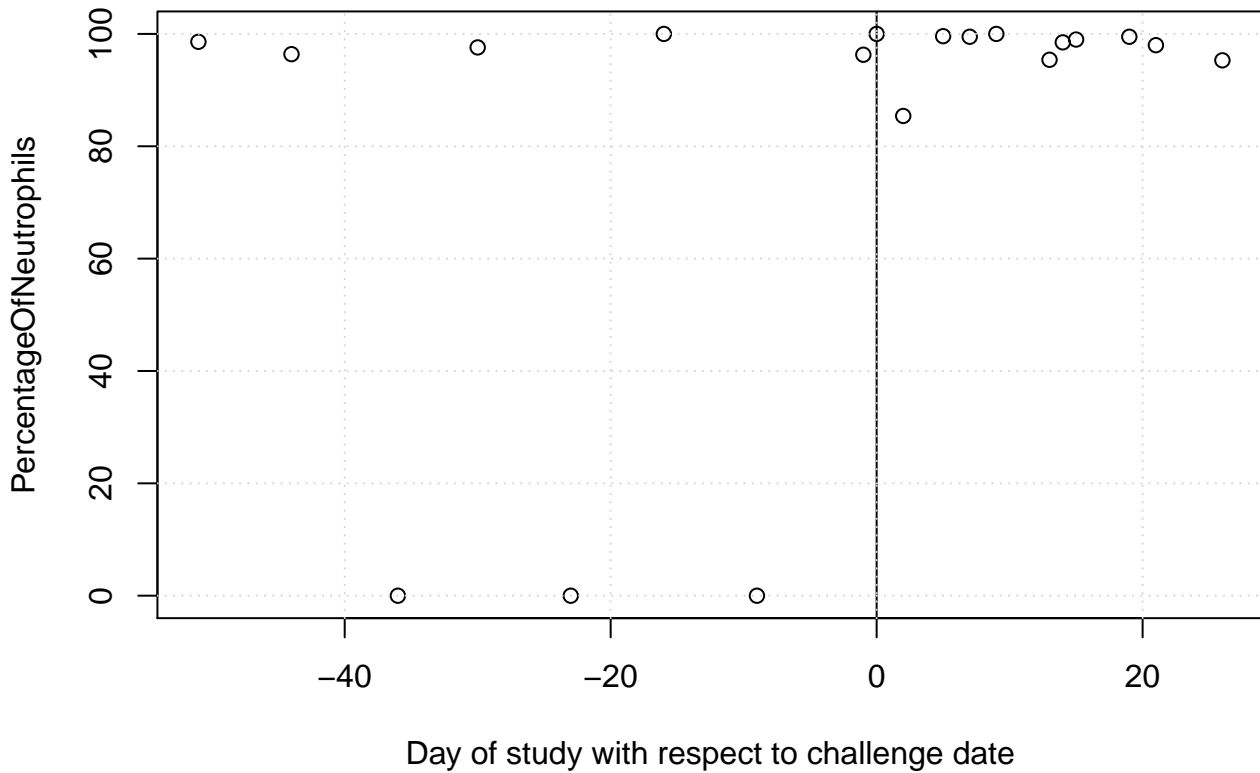

**P04A**

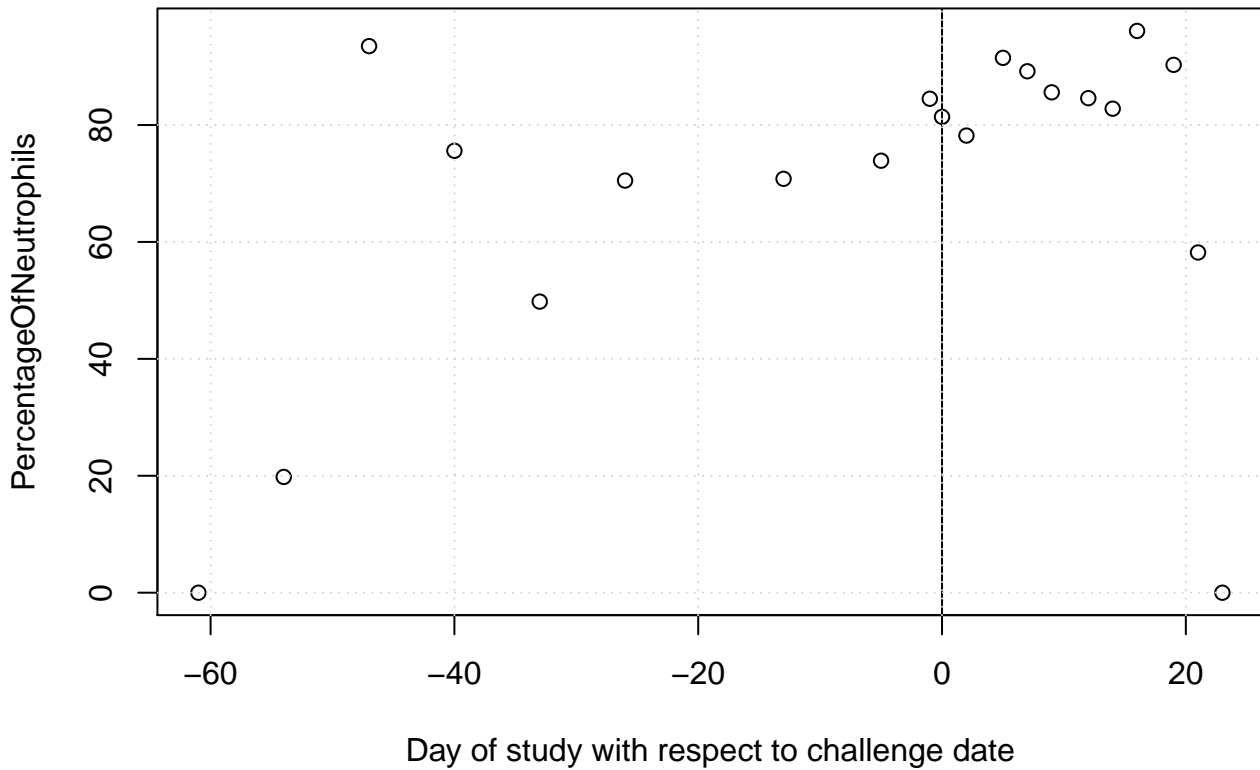

# P05A

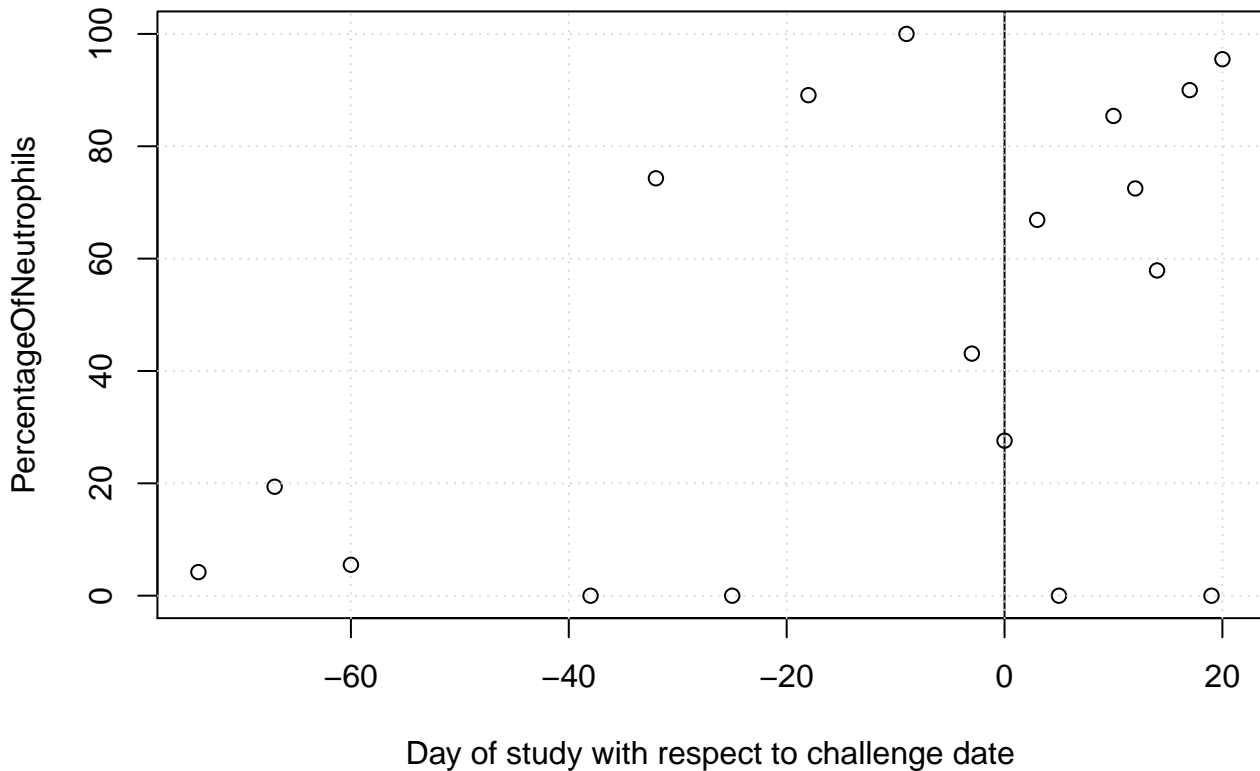

# P06A

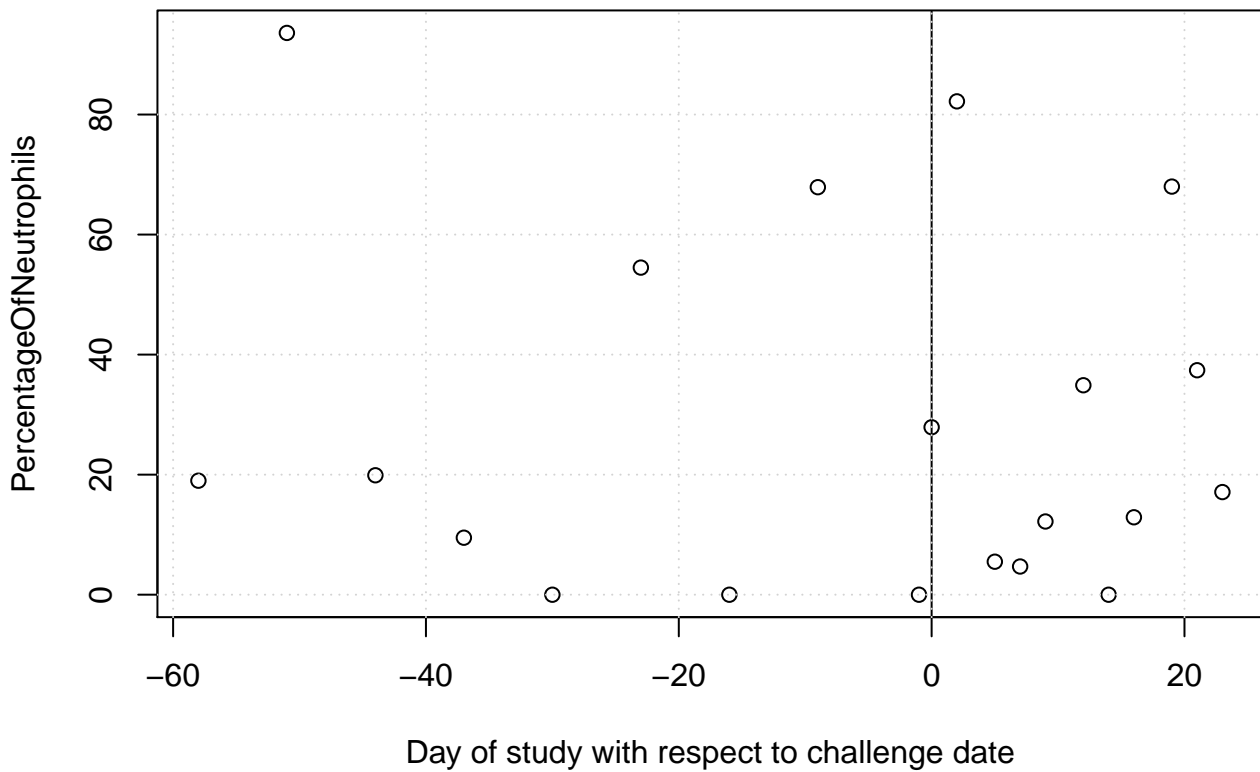

**P07A**

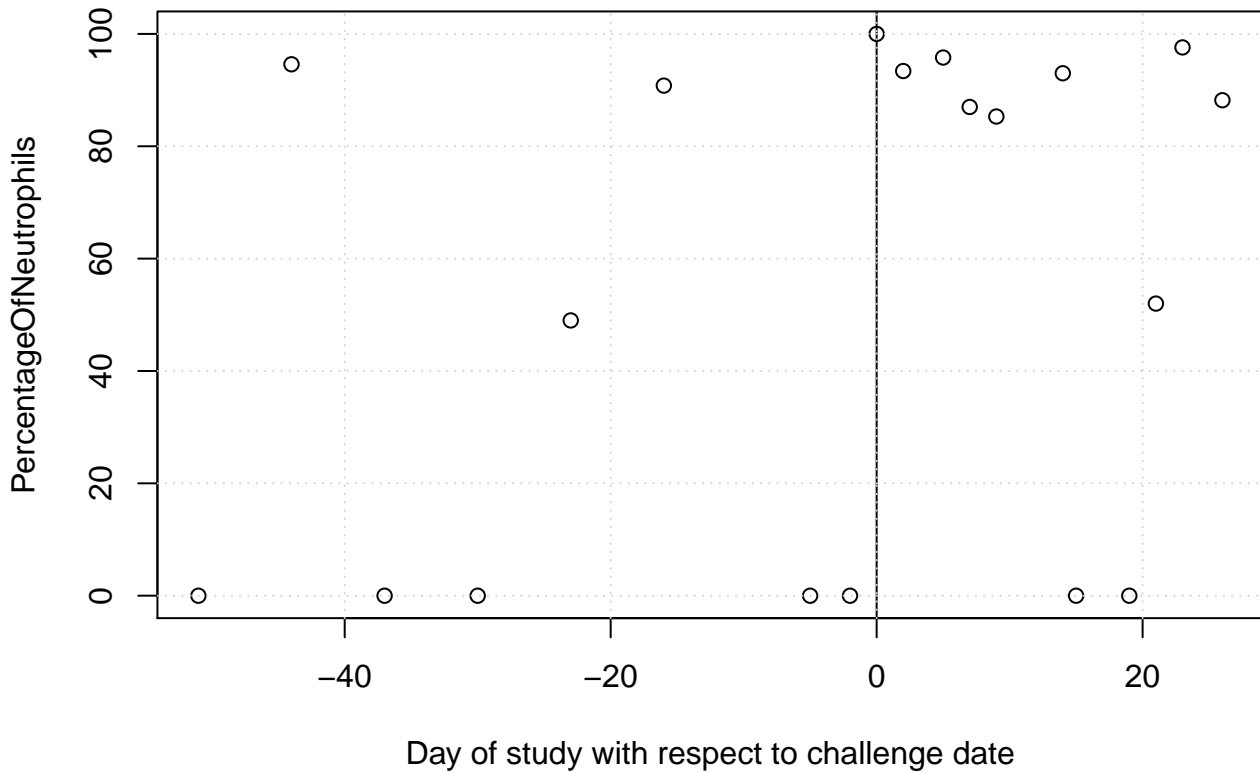

# P08A

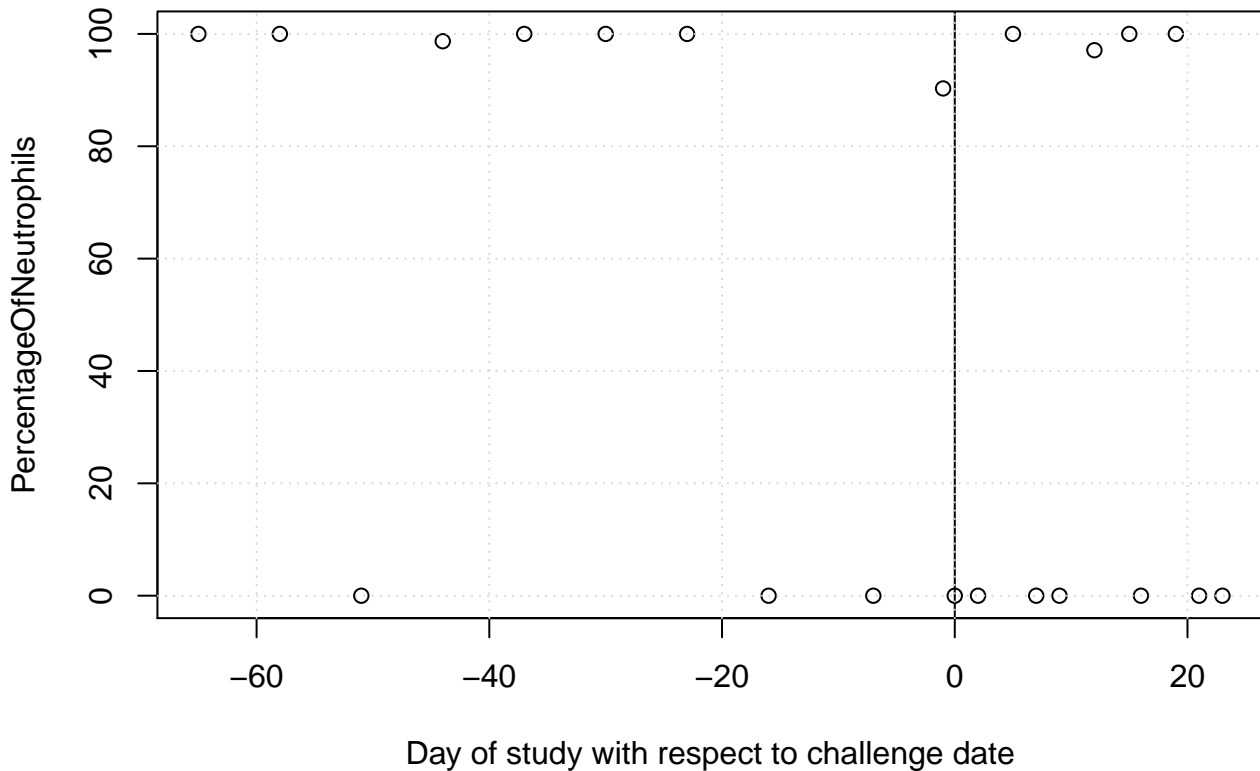

# P09A

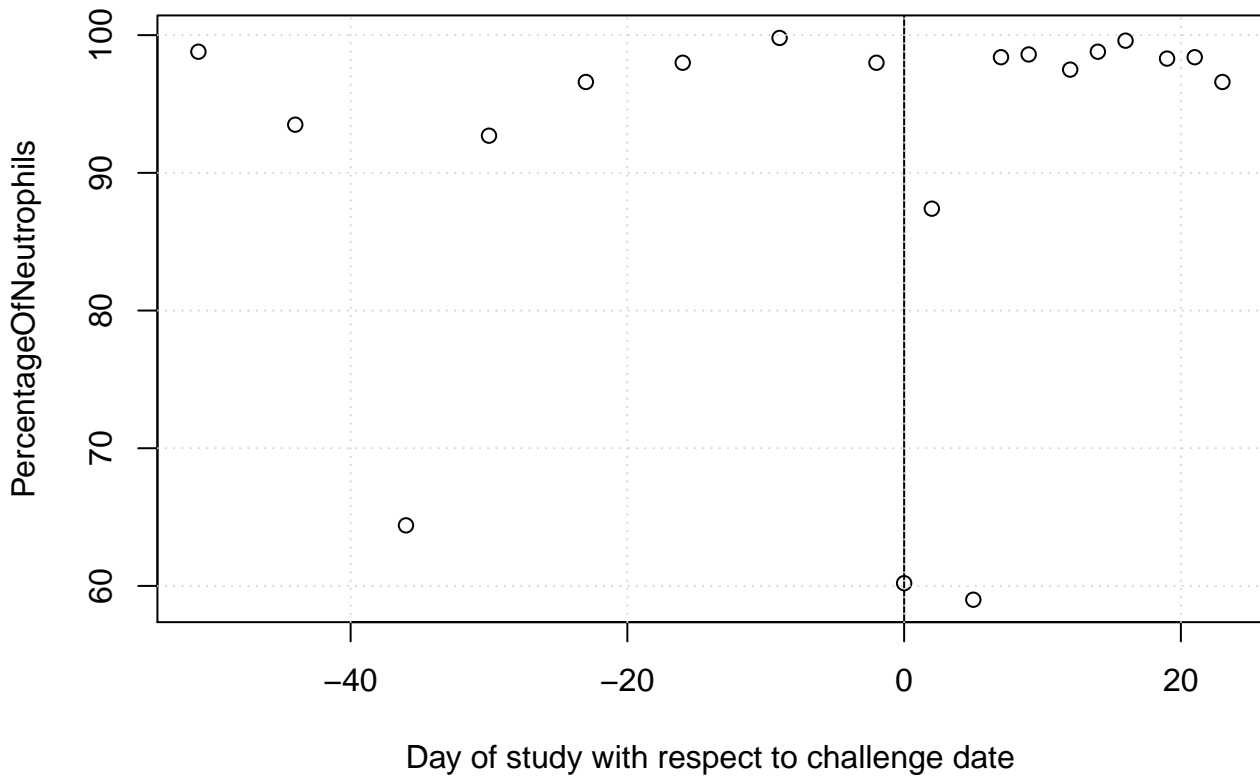



# P10A

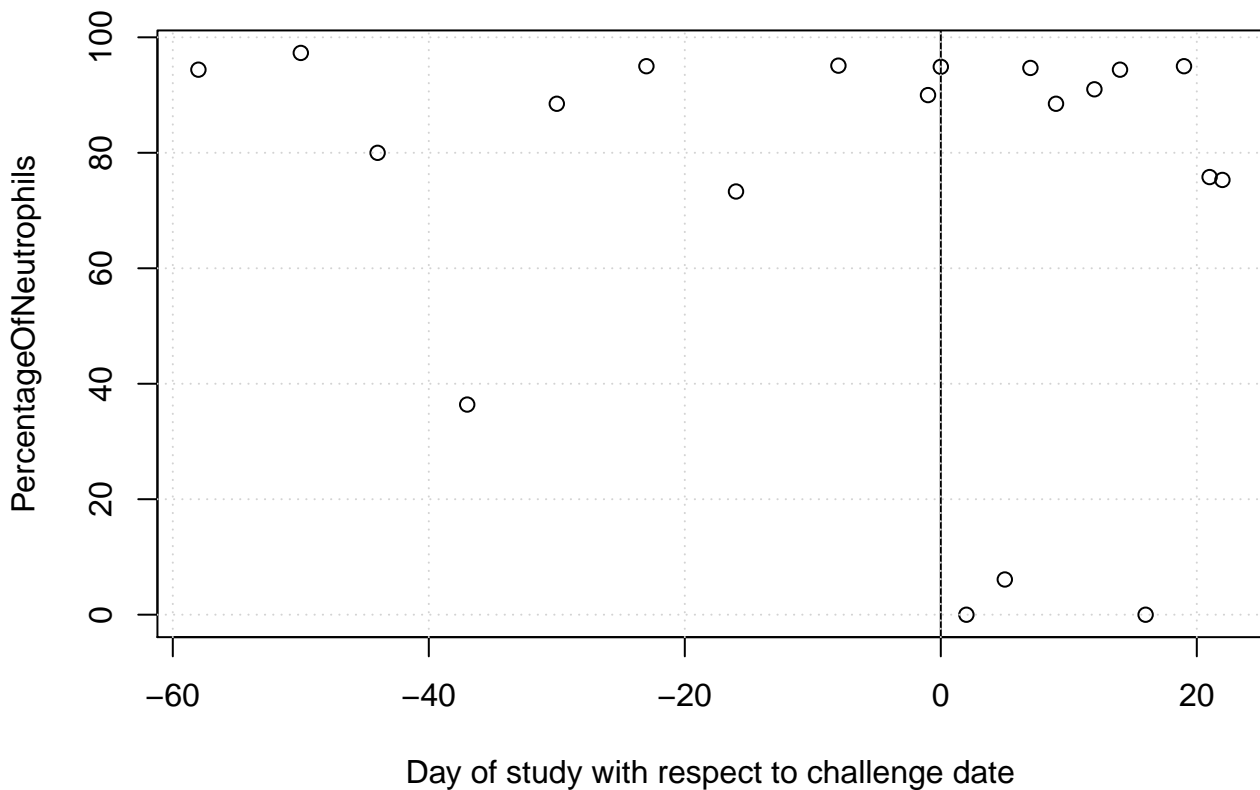

# P11A

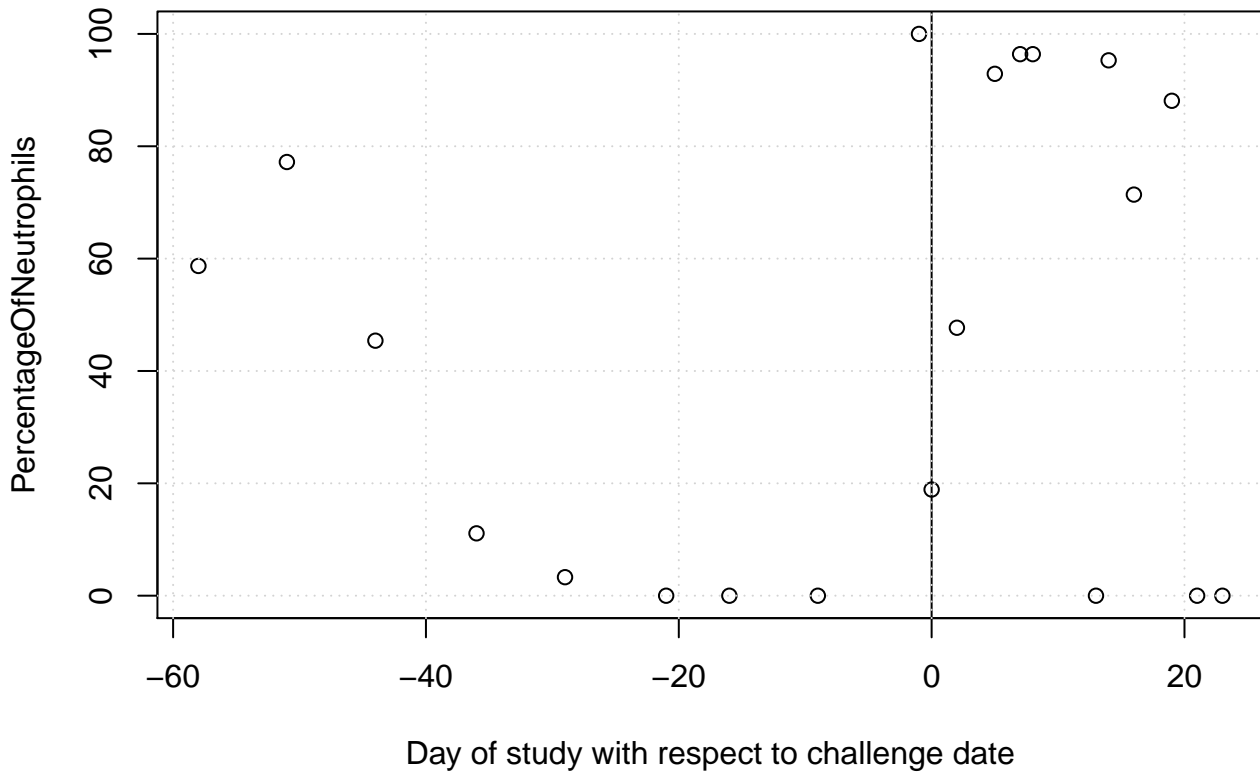

## P12A

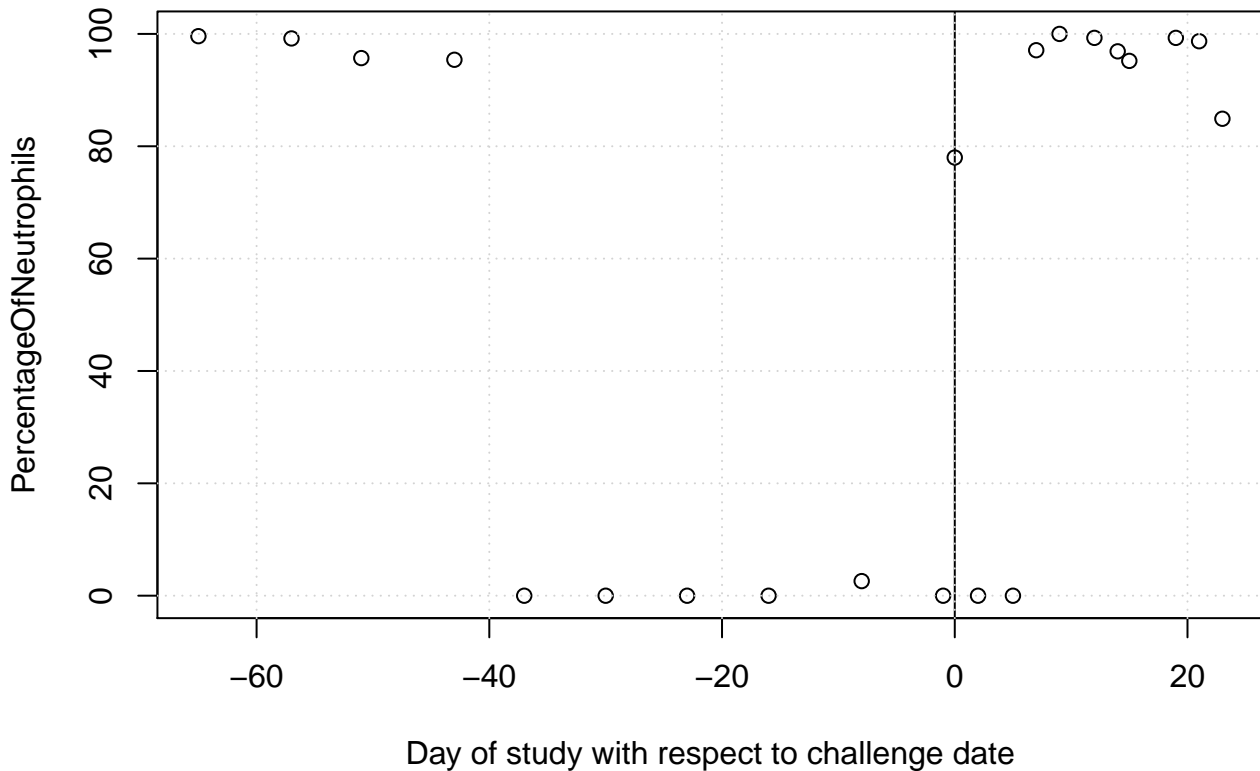

# P13A

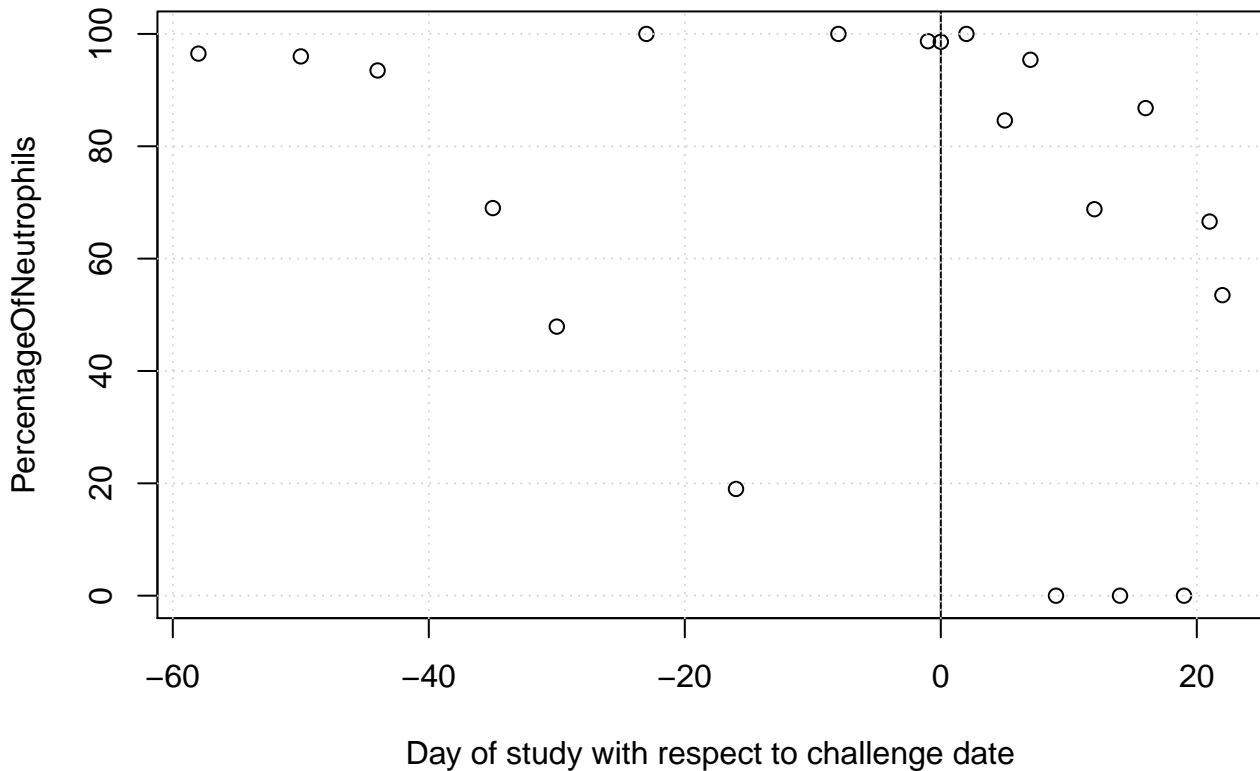

# P01H

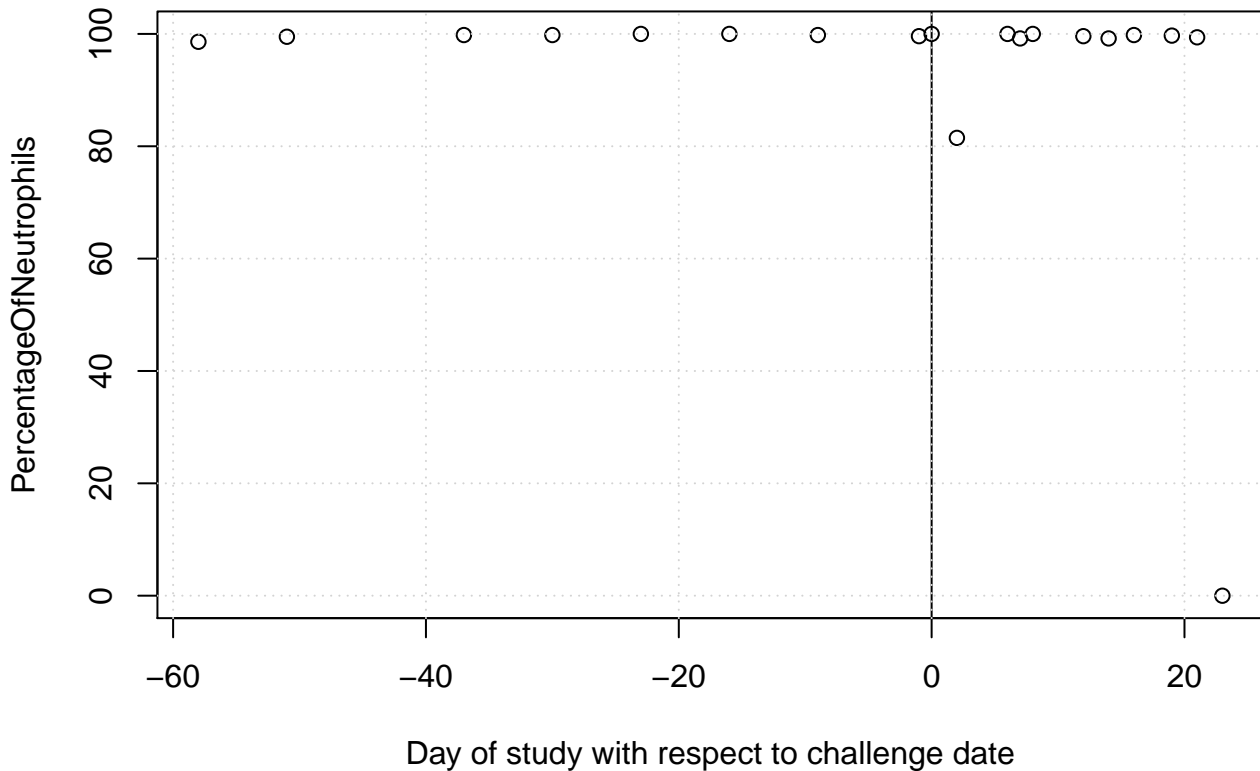

# P03H

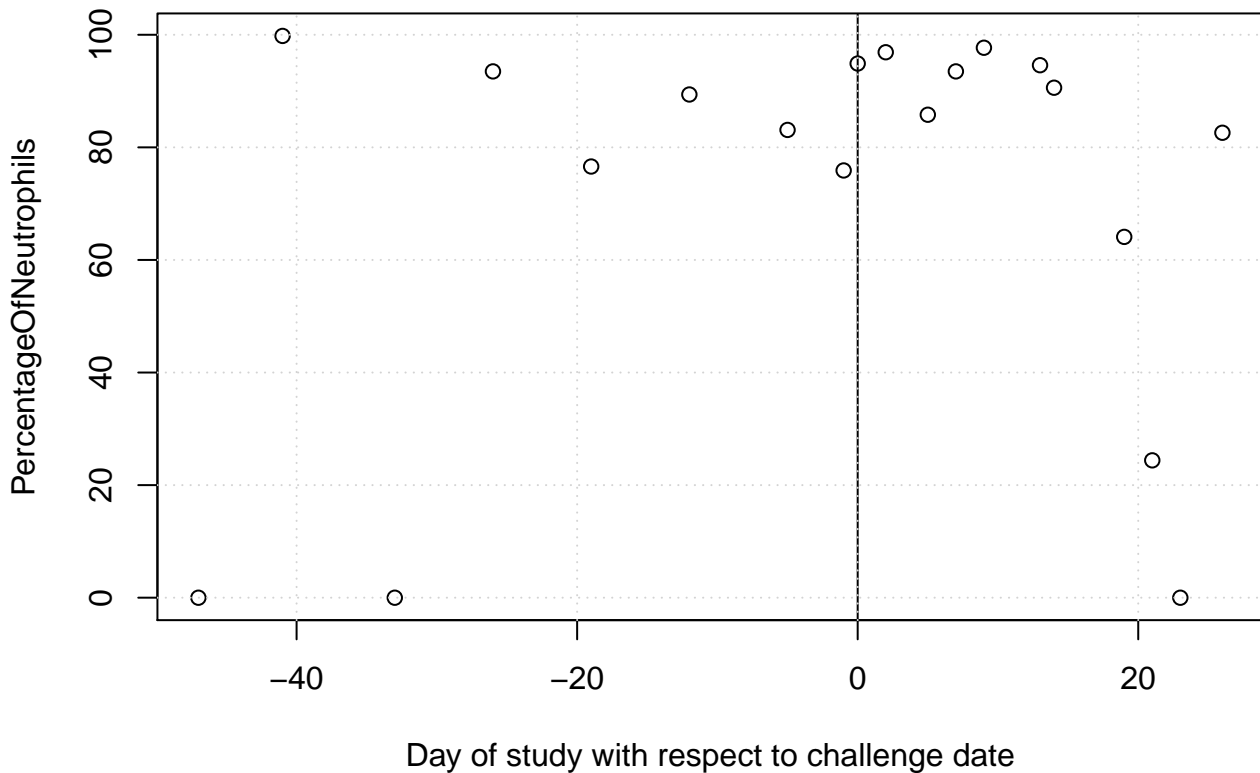

# P05H

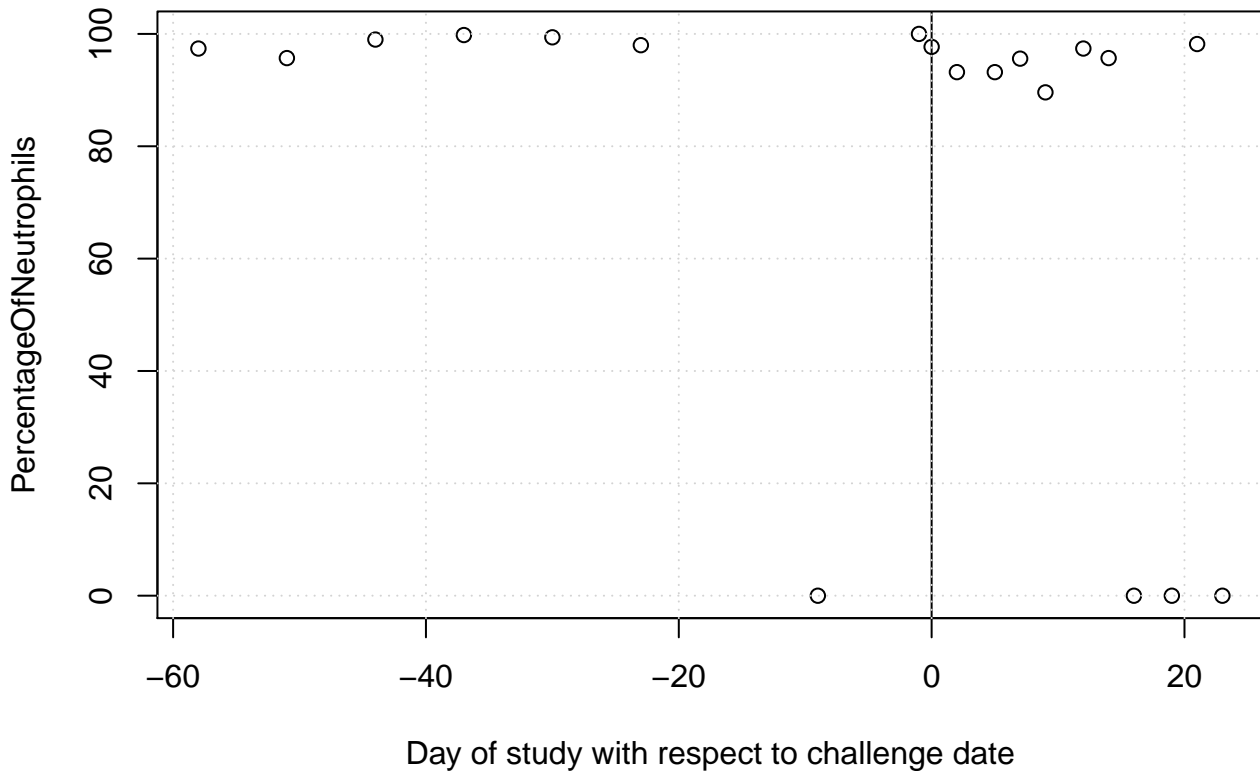

# P06H

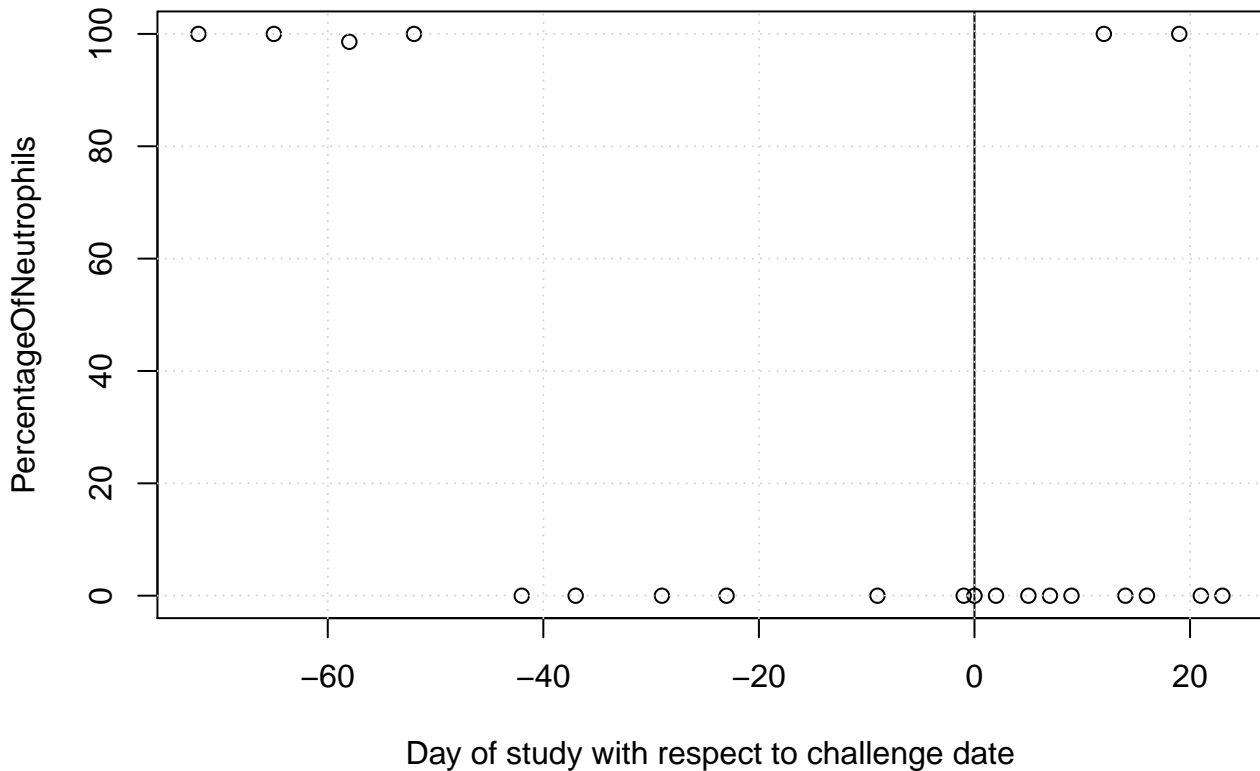



# P07H

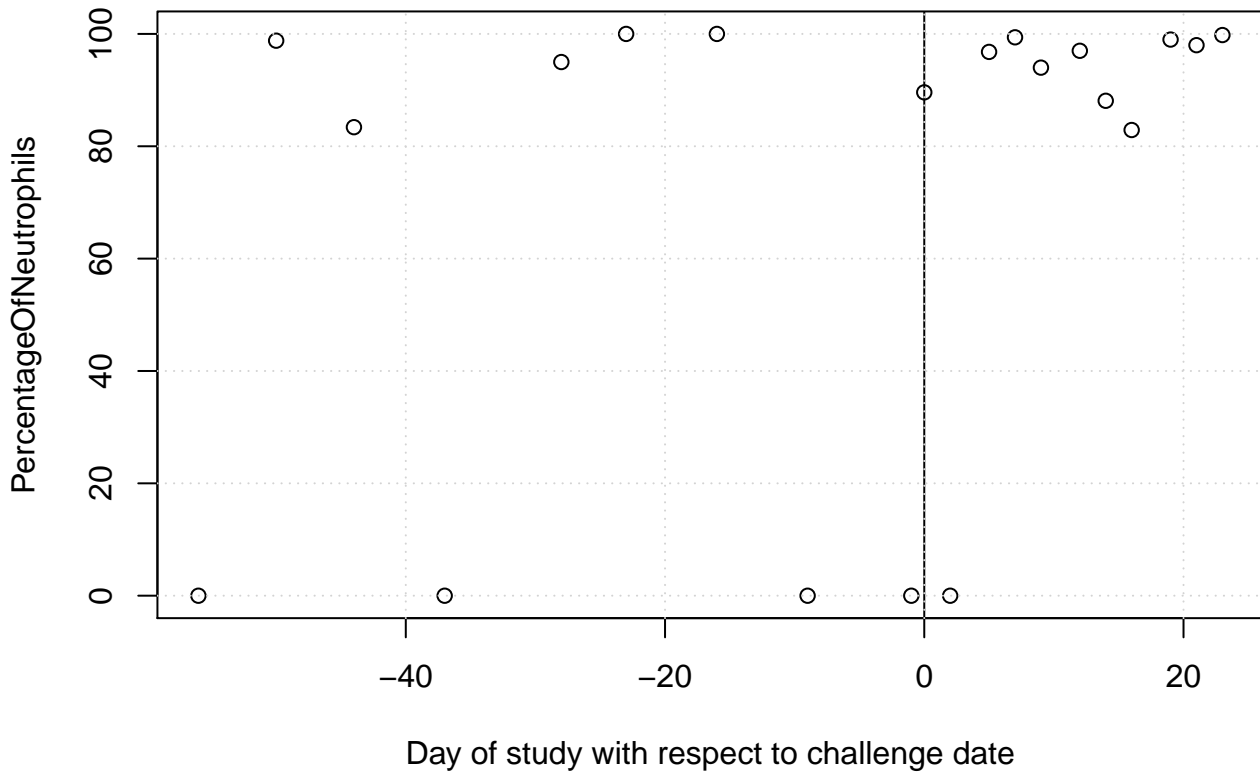

# P08H

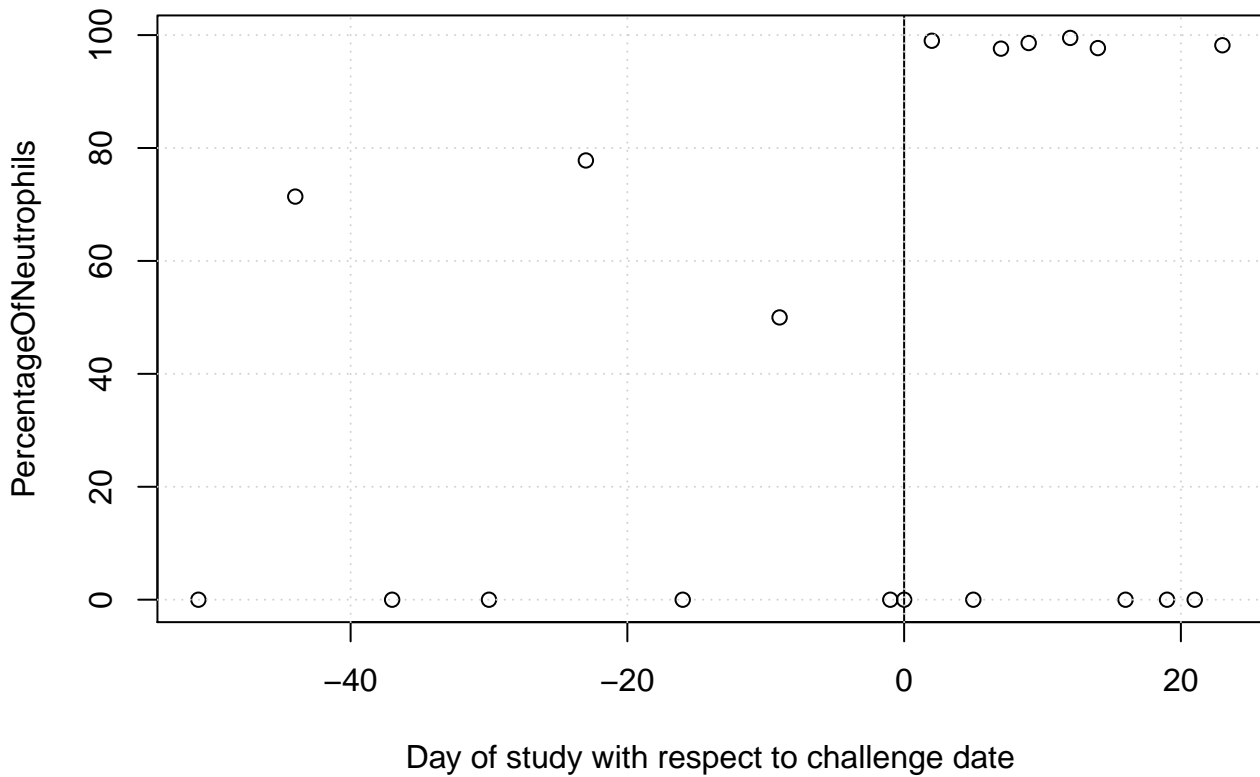

# P09H

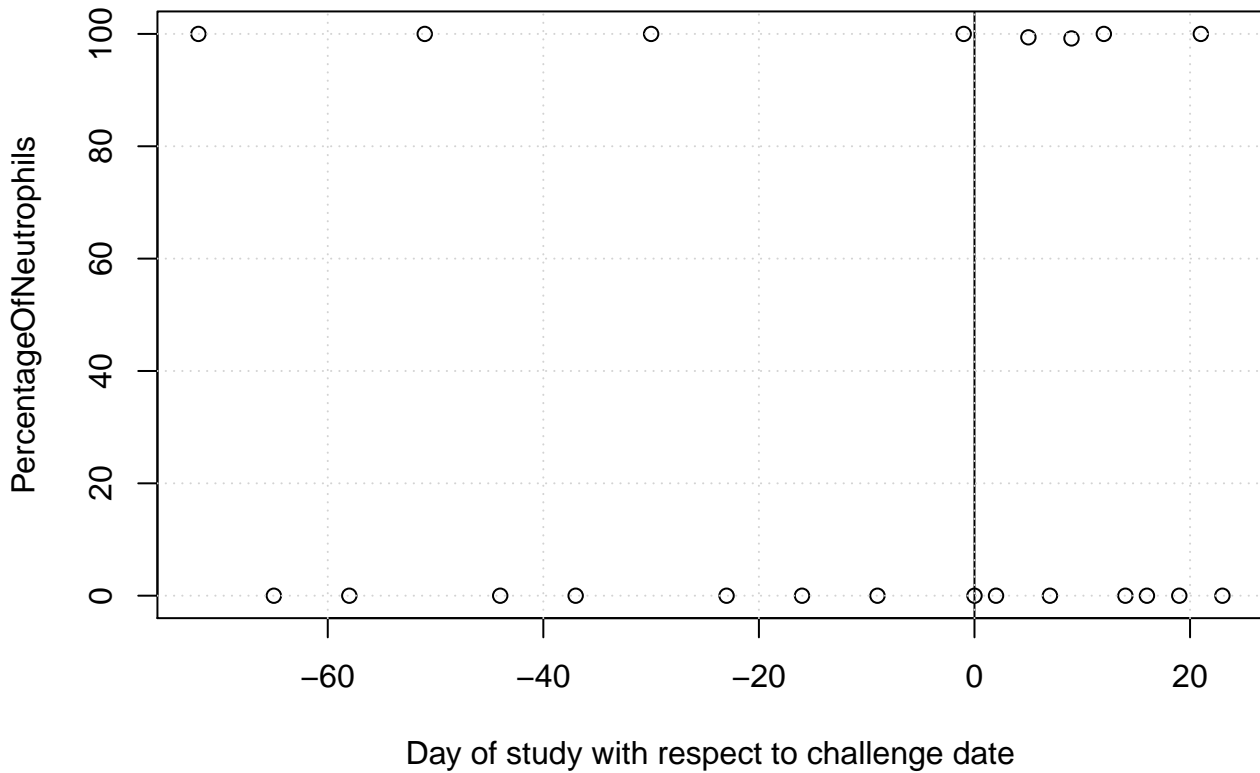

# P11H

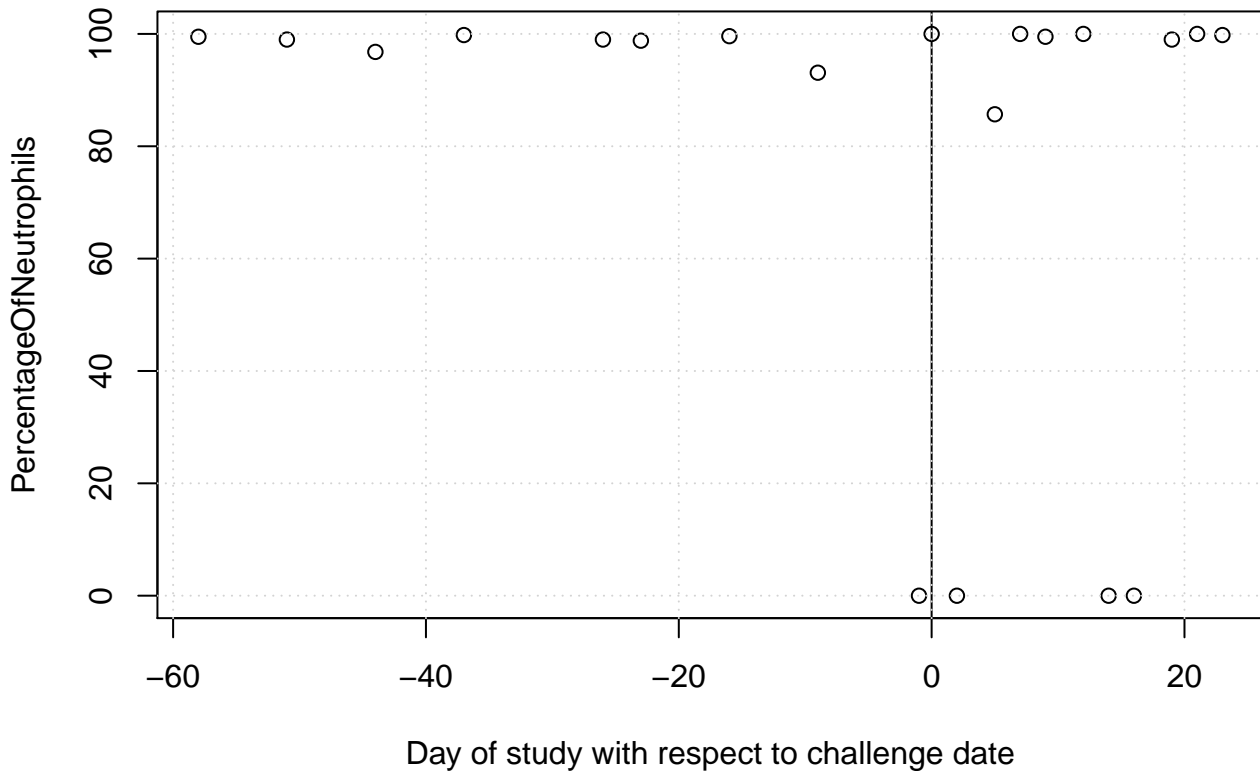

# P12H

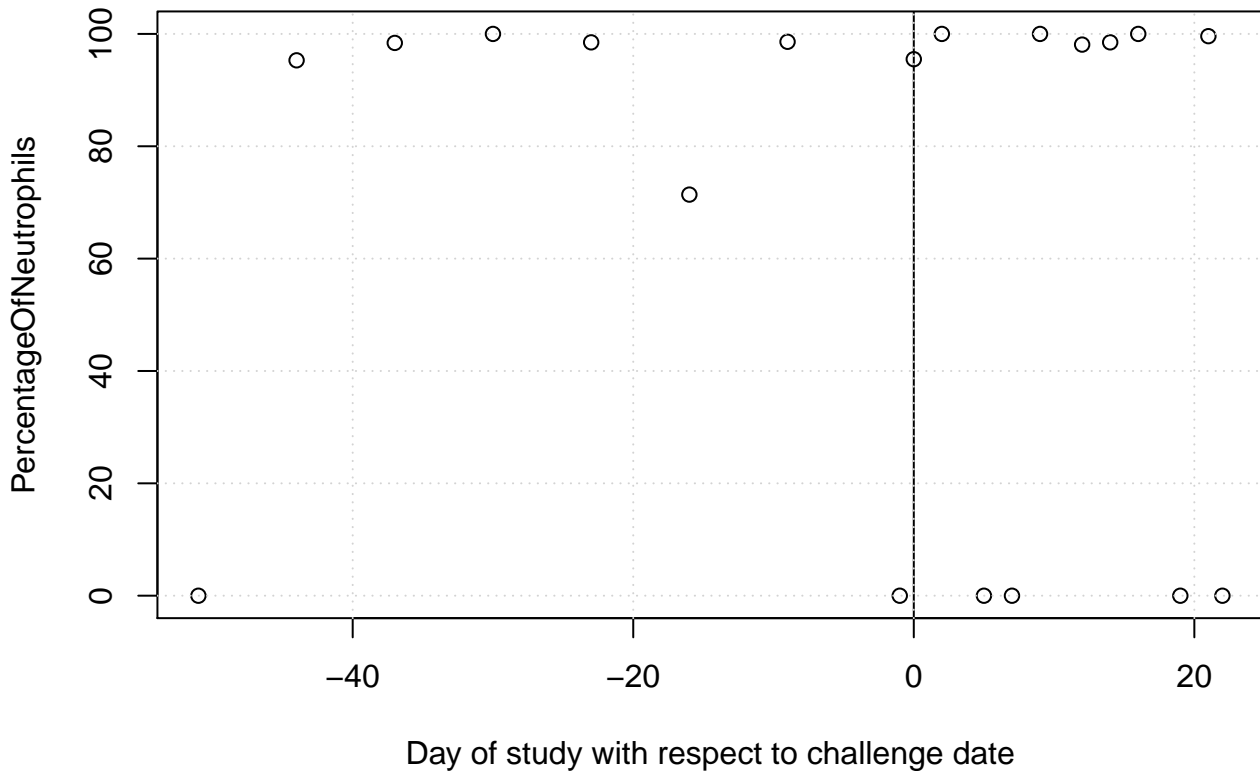

# P13H

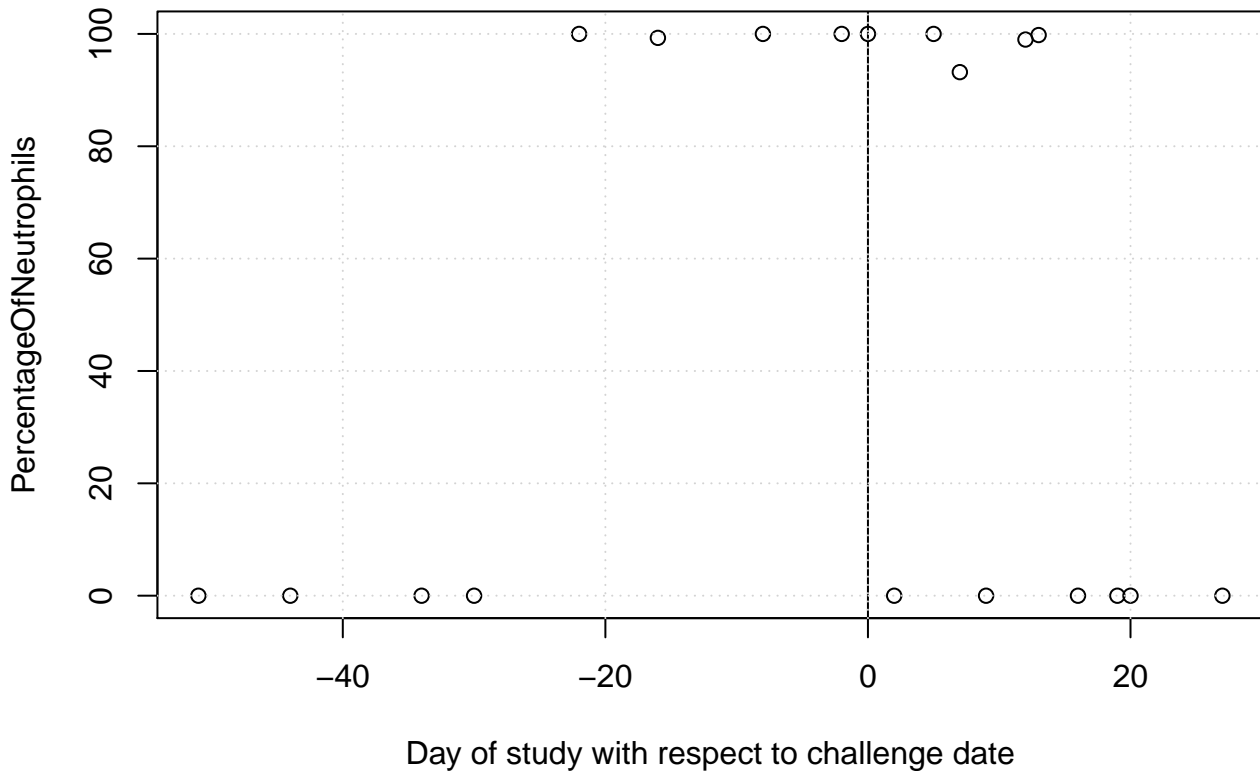

# P14H

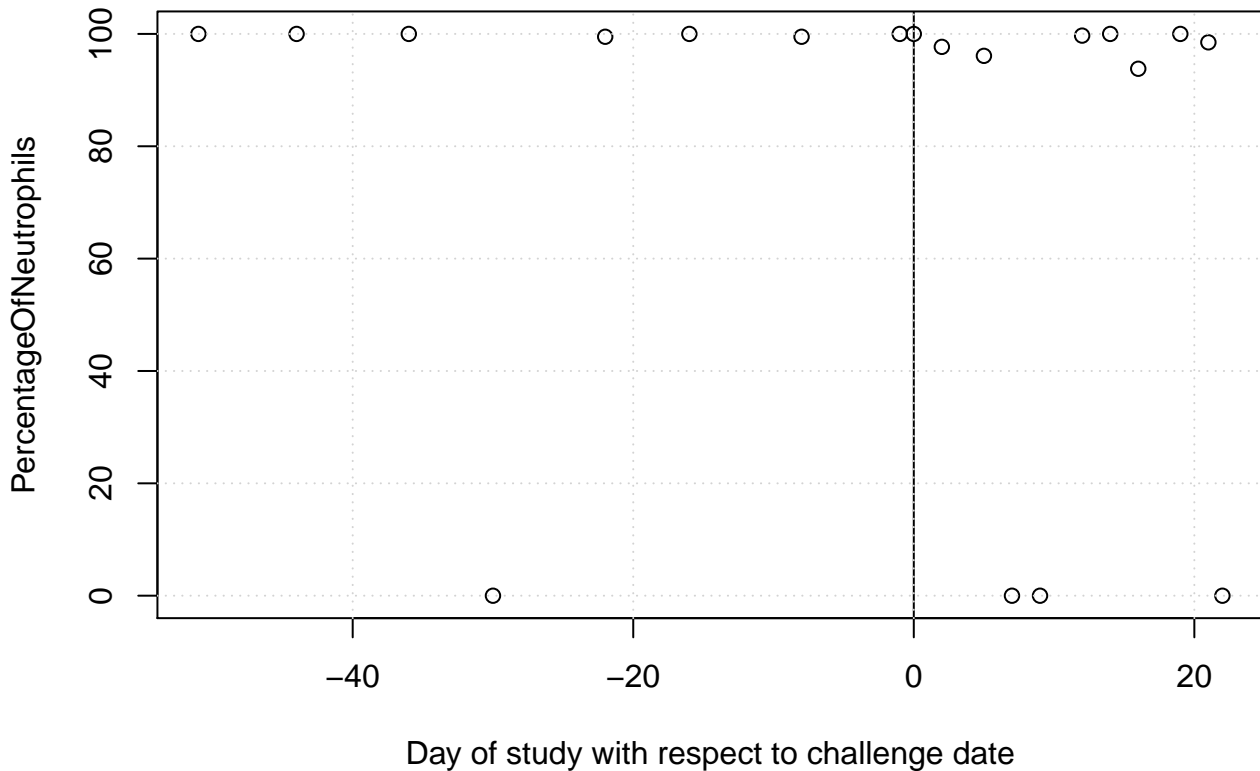

# P15H

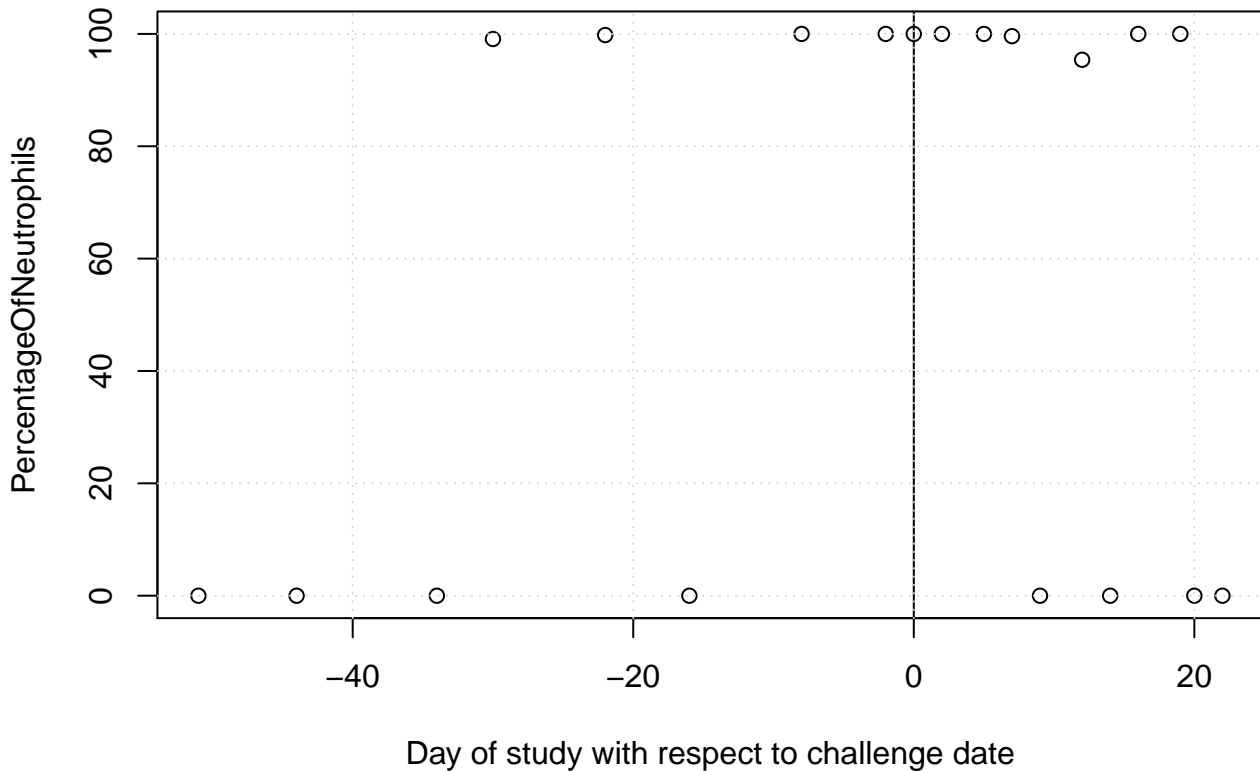

Supplement: supp [file elife-47969-supp-v1.zip]
