# Supplementary material for: Loss of adaptive capacity in asthmatic patients revealed by biomarker fluctuation dynamics after rhinovirus challenge
Source: eLife journal article supplement (doi:10.7554/elife.47969), 2019-11-05

**Patient ID = P01H**  
**Biomarker = Normalized FVC**

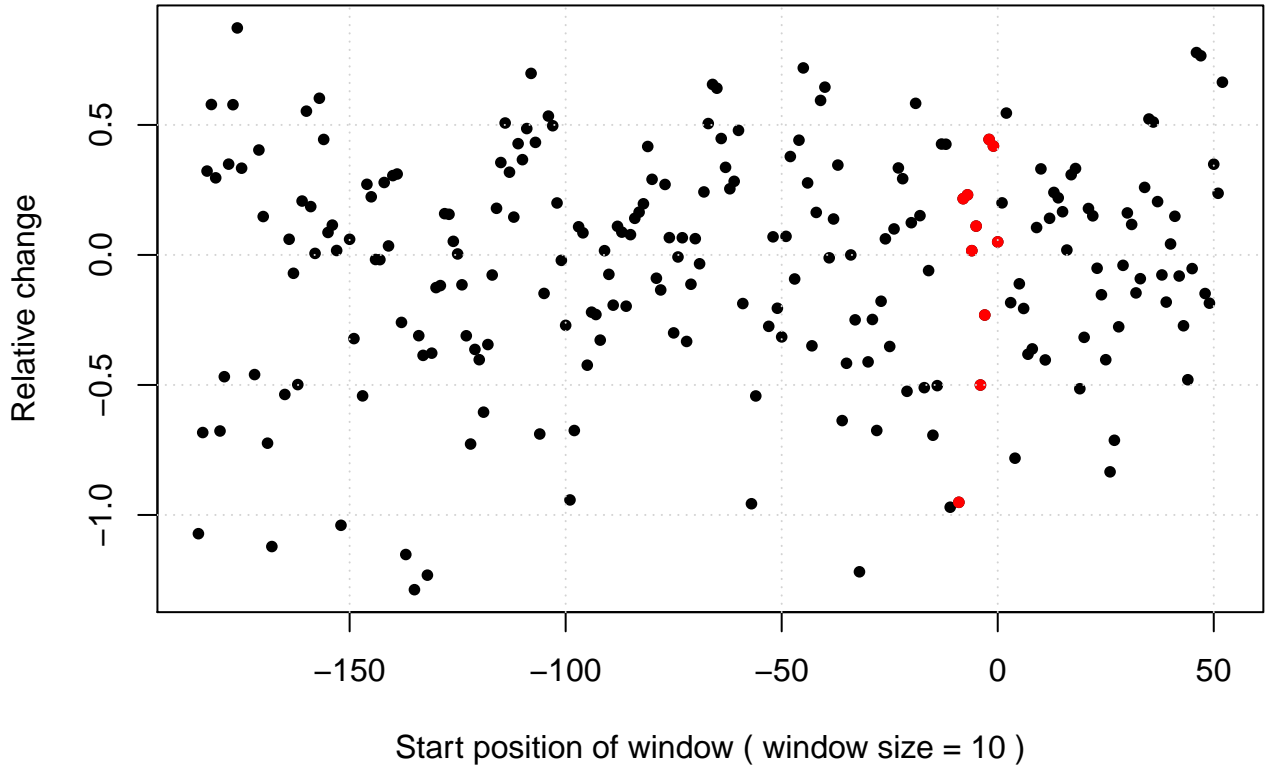

**Patient ID = P03H**  
**Biomarker = Normalized FVC**

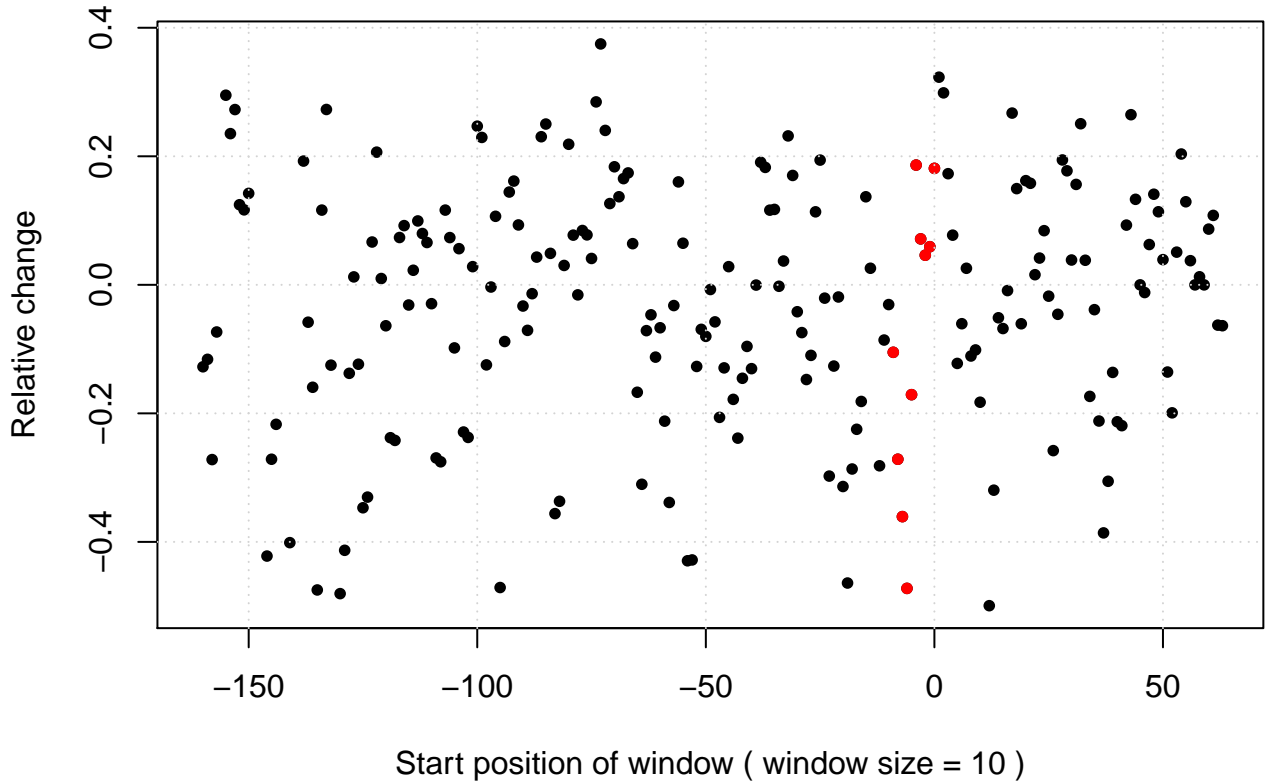

**Patient ID = P05H**  
**Biomarker = Normalized FVC**

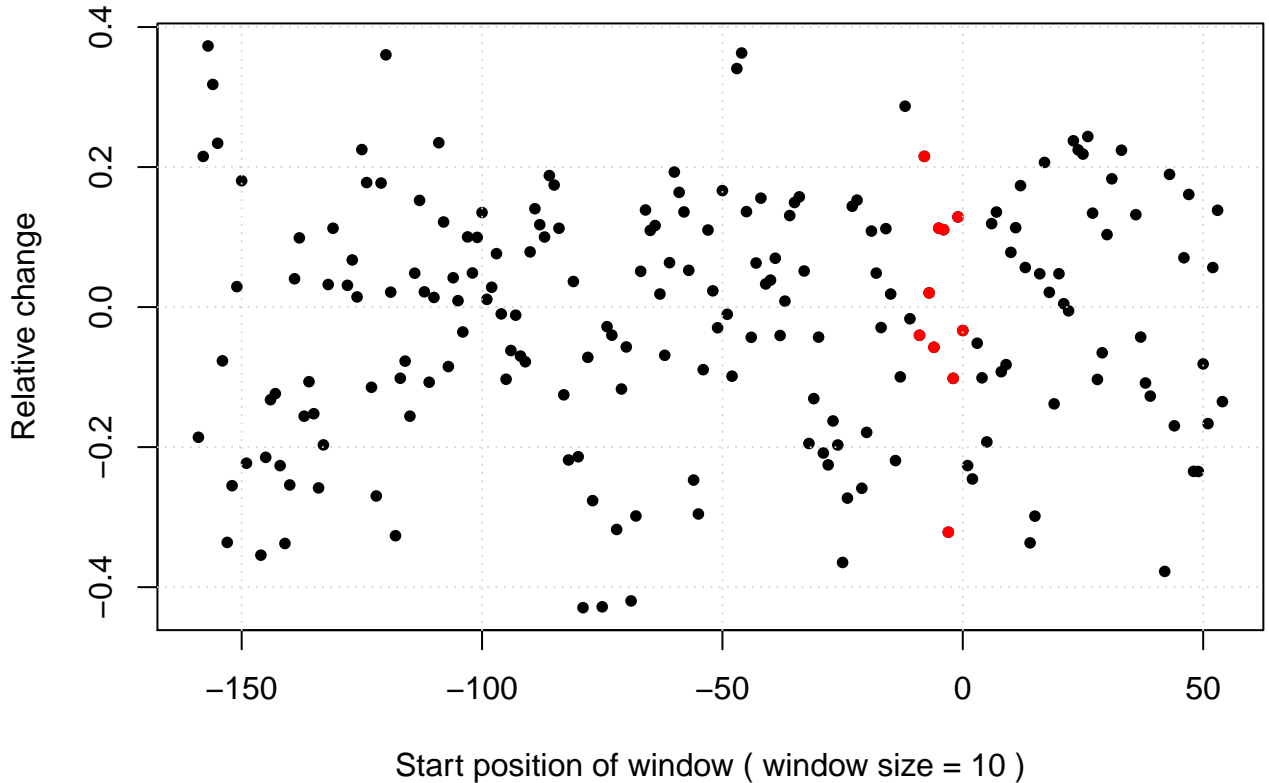

**Patient ID = P06H**  
**Biomarker = Normalized FVC**

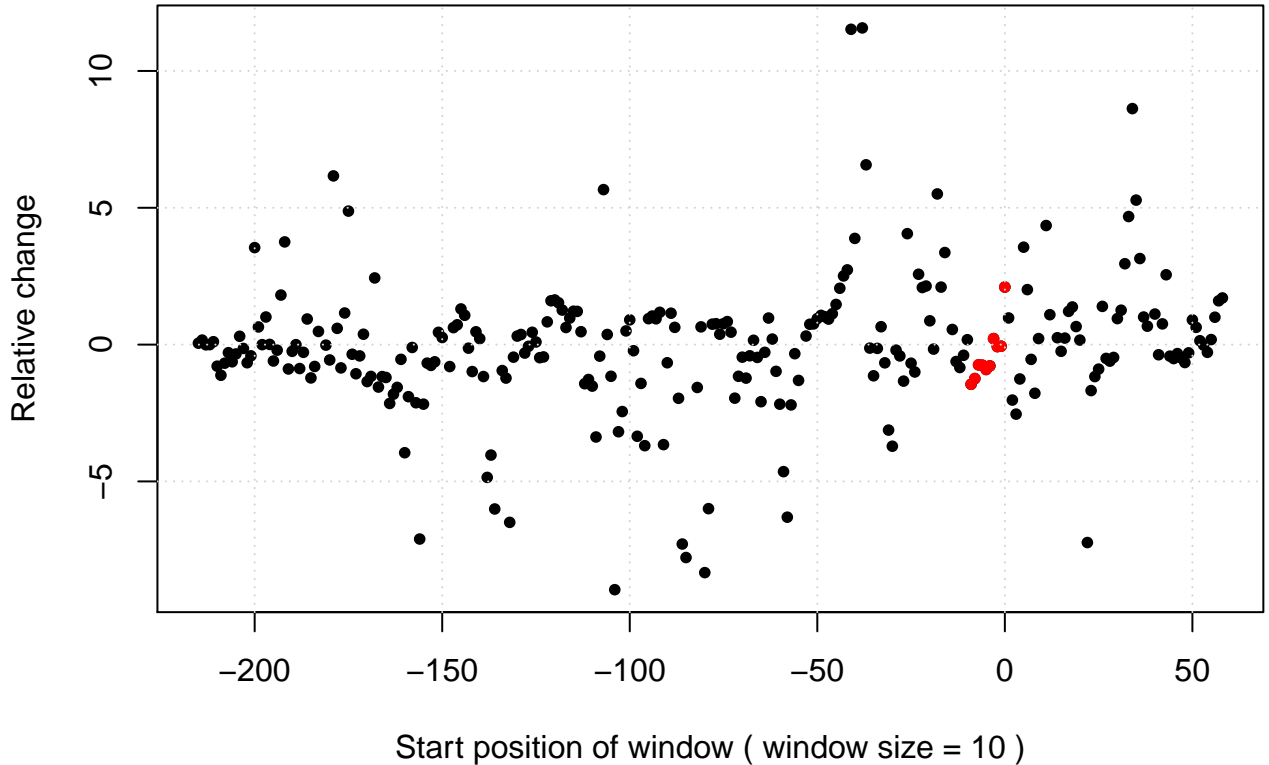

**Patient ID = P07H**  
**Biomarker = Normalized FVC**

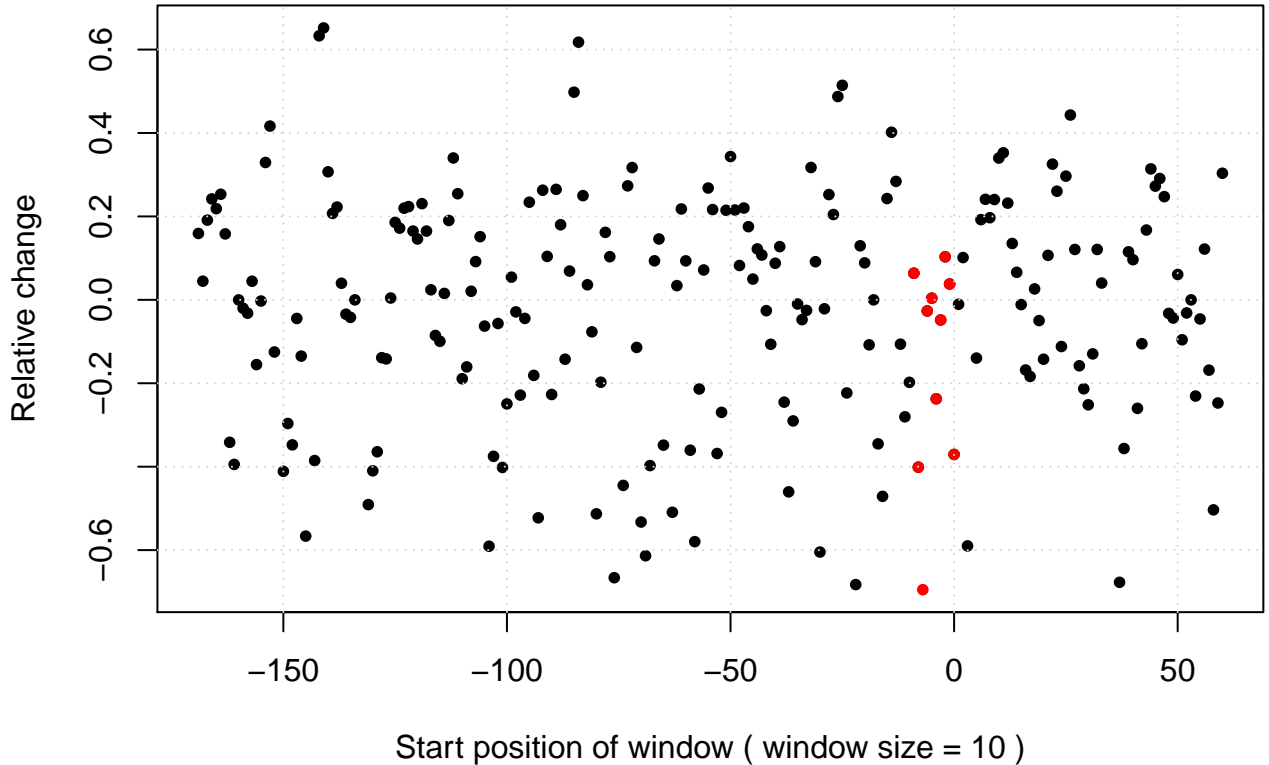

**Patient ID = P08H**  
**Biomarker = Normalized FVC**

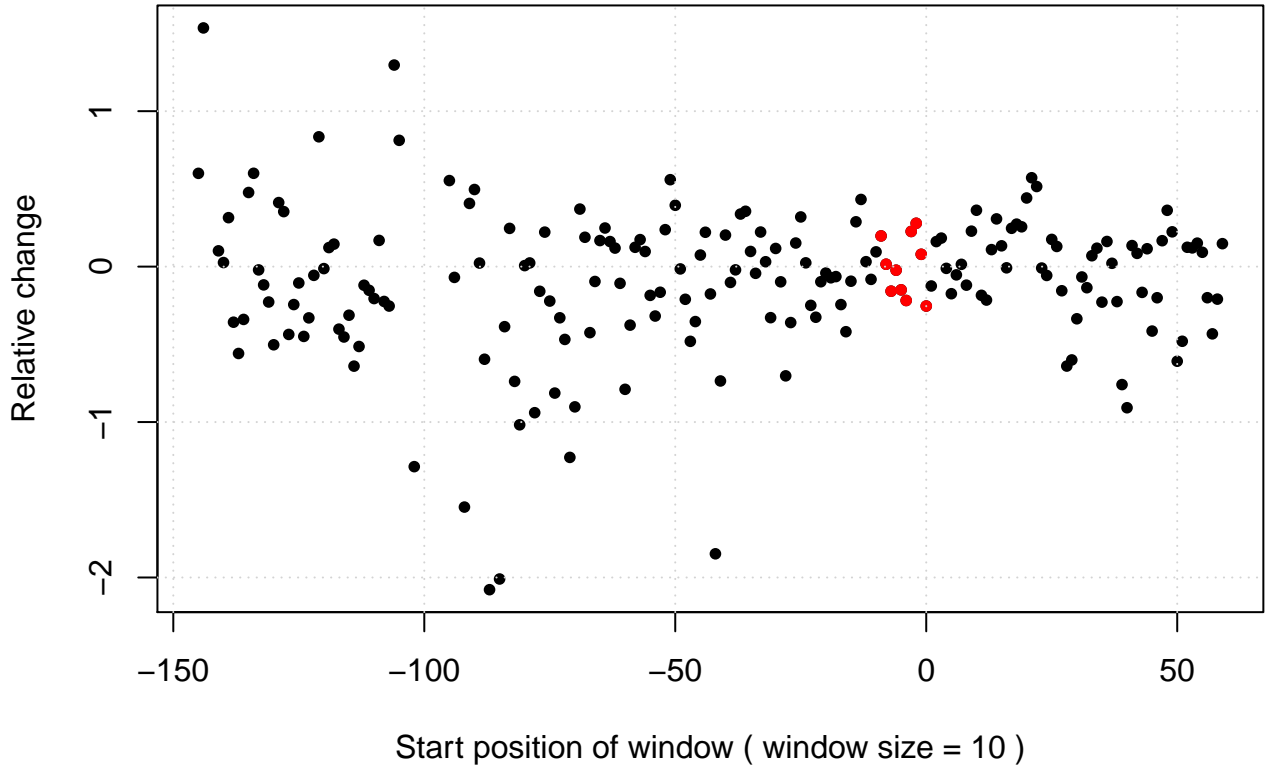

**Patient ID = P09H**  
**Biomarker = Normalized FVC**

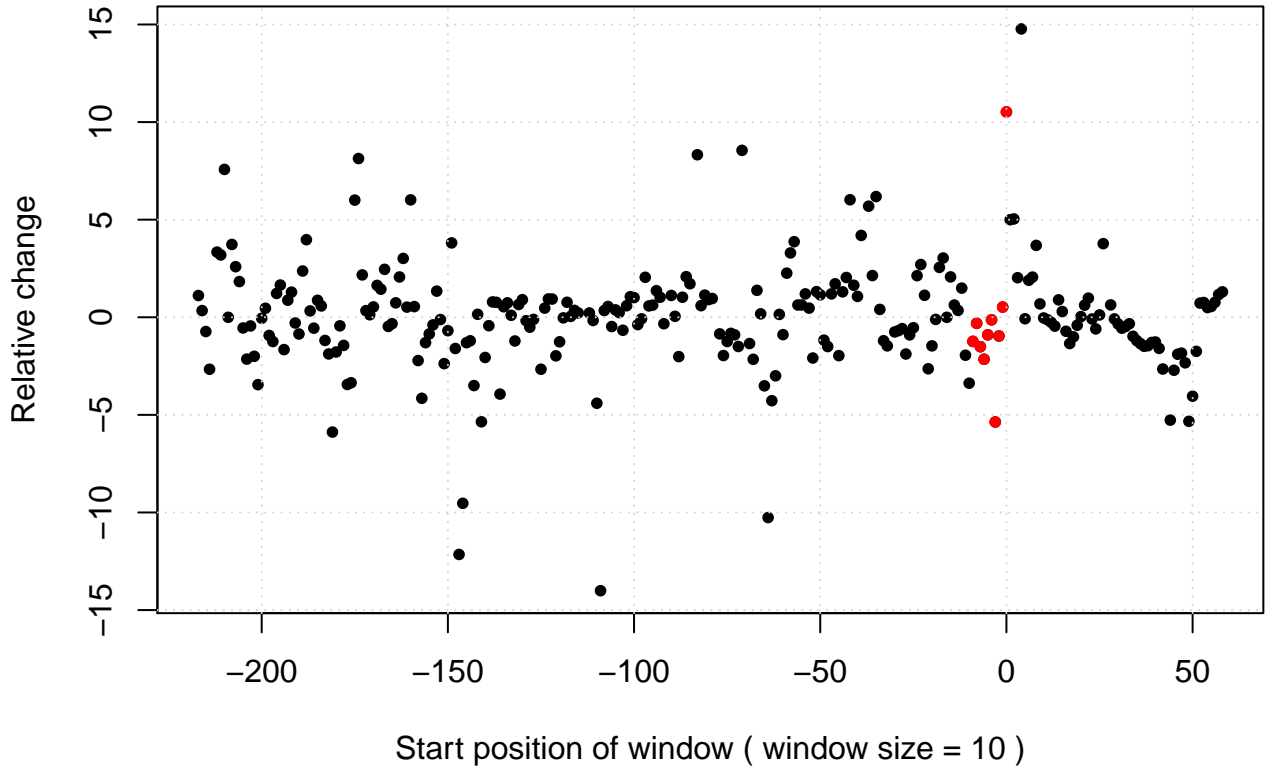

**Patient ID = P11H**  
**Biomarker = Normalized FVC**

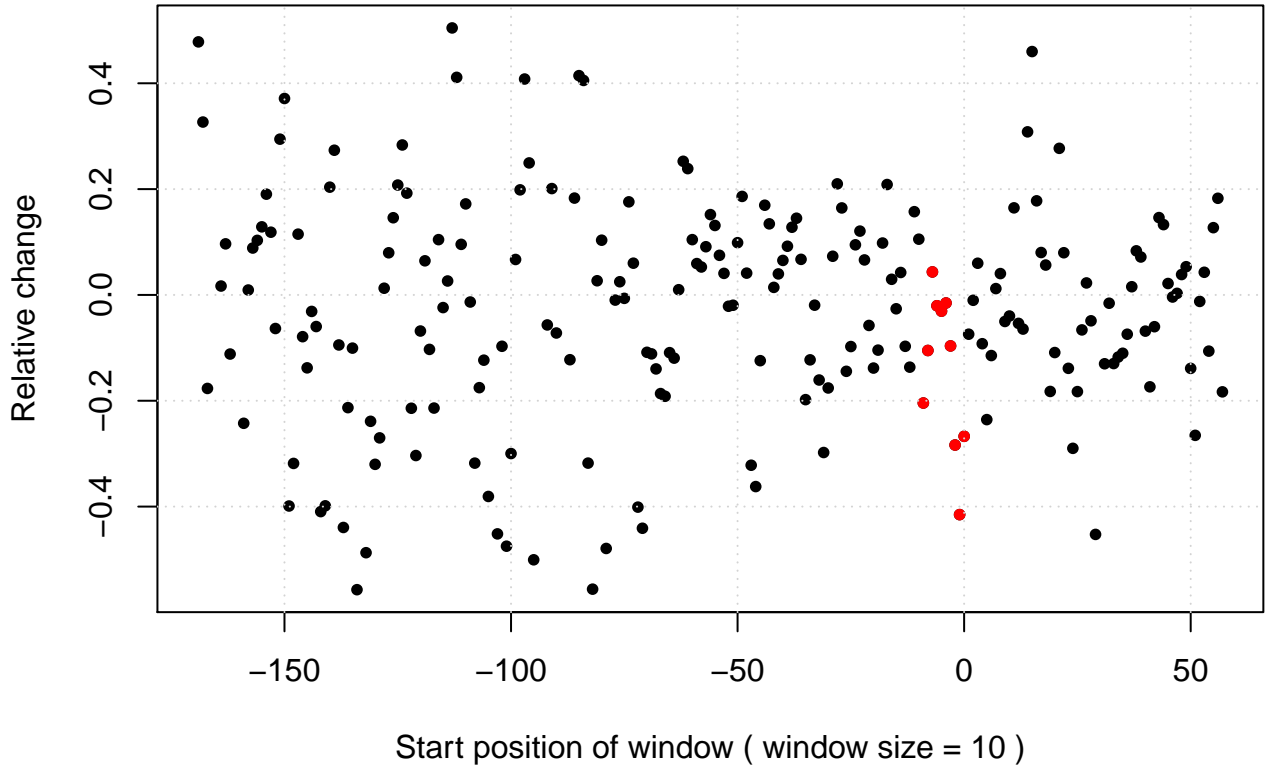



**Patient ID = P12H**  
**Biomarker = Normalized FVC**

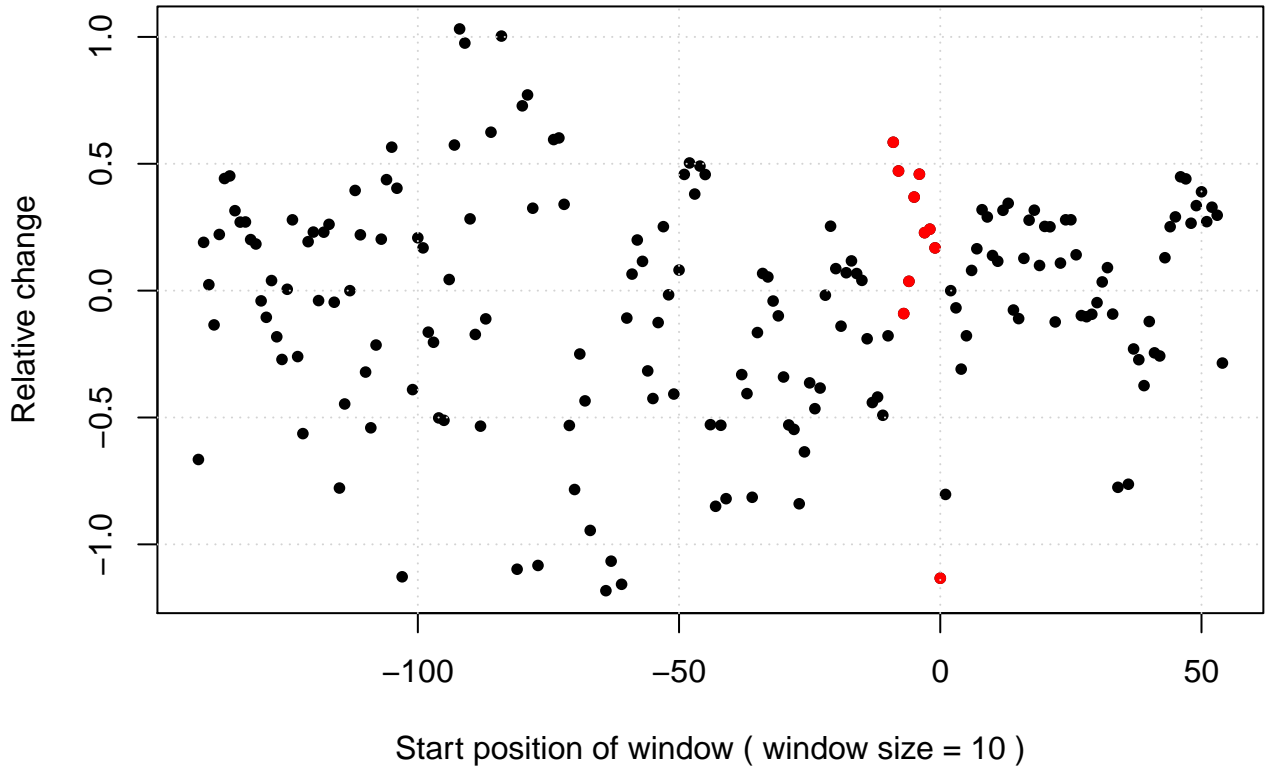

**Patient ID = P13H**  
**Biomarker = Normalized FVC**

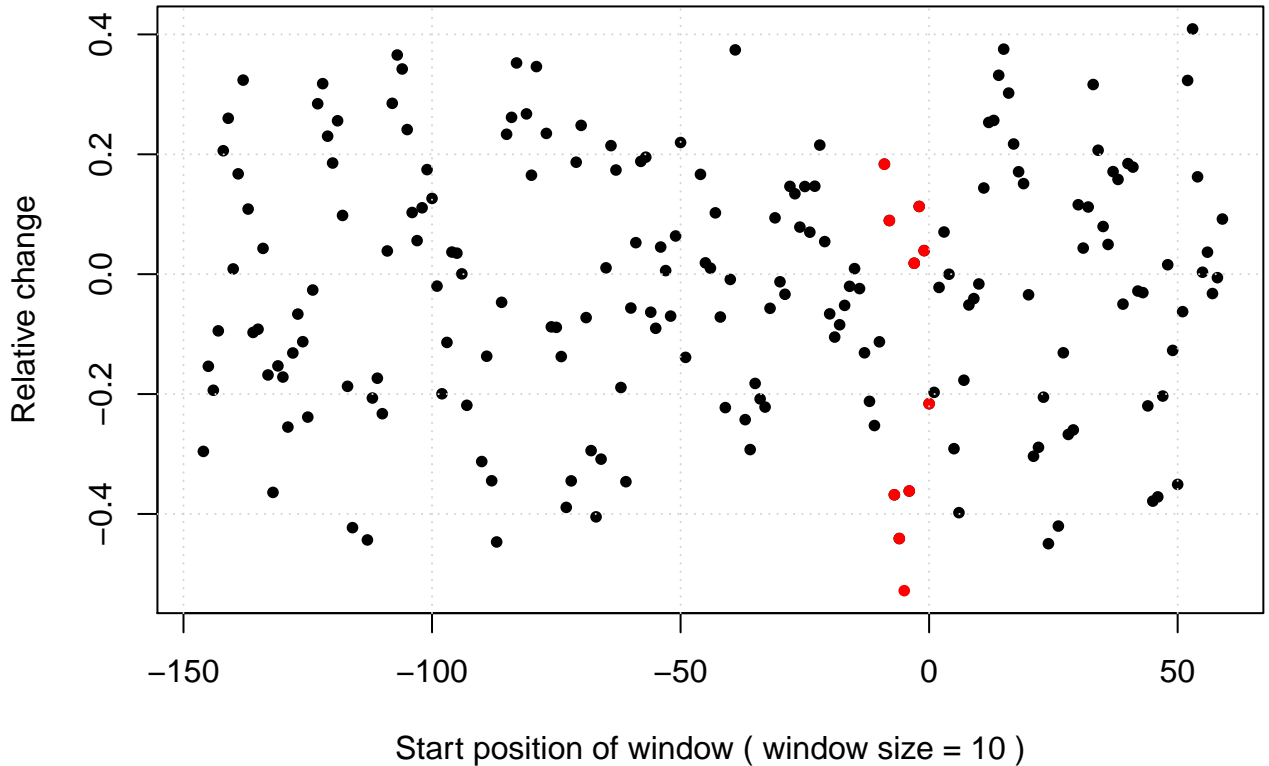

**Patient ID = P14H**  
**Biomarker = Normalized FVC**

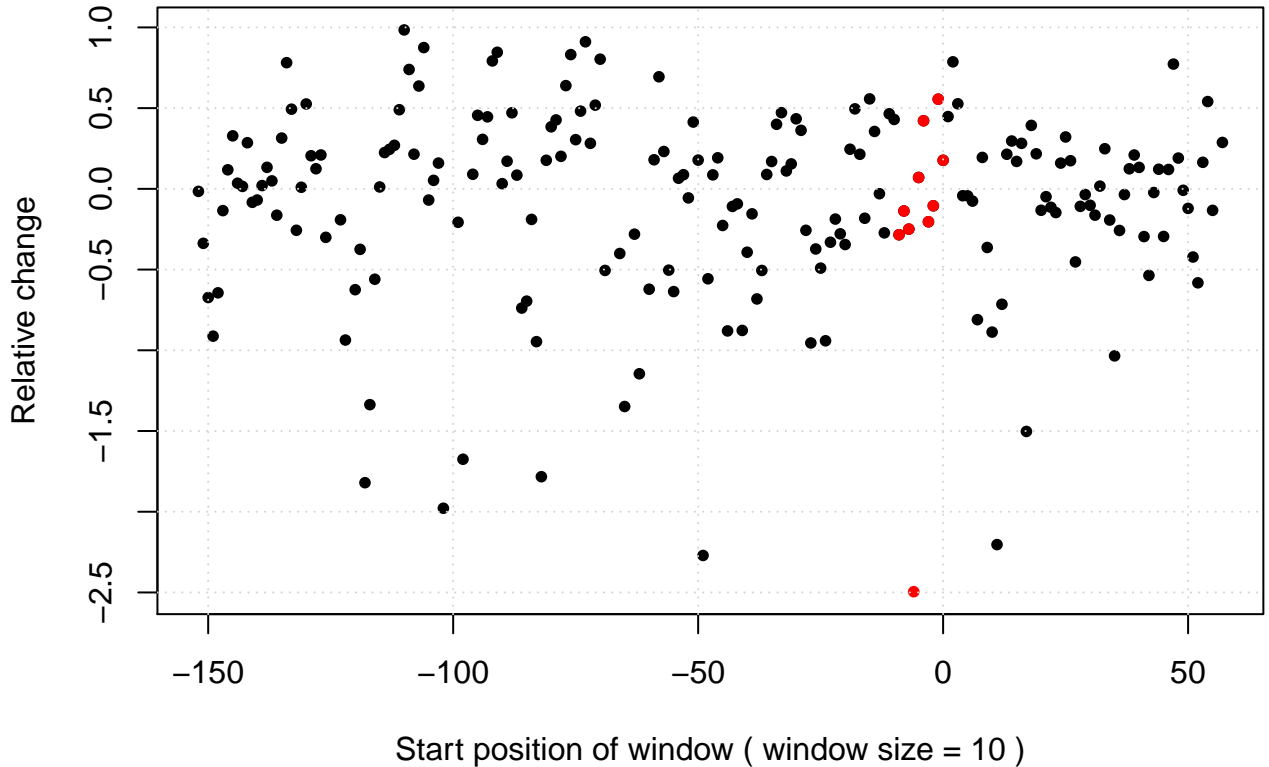

**Patient ID = P15H**  
**Biomarker = Normalized FVC**

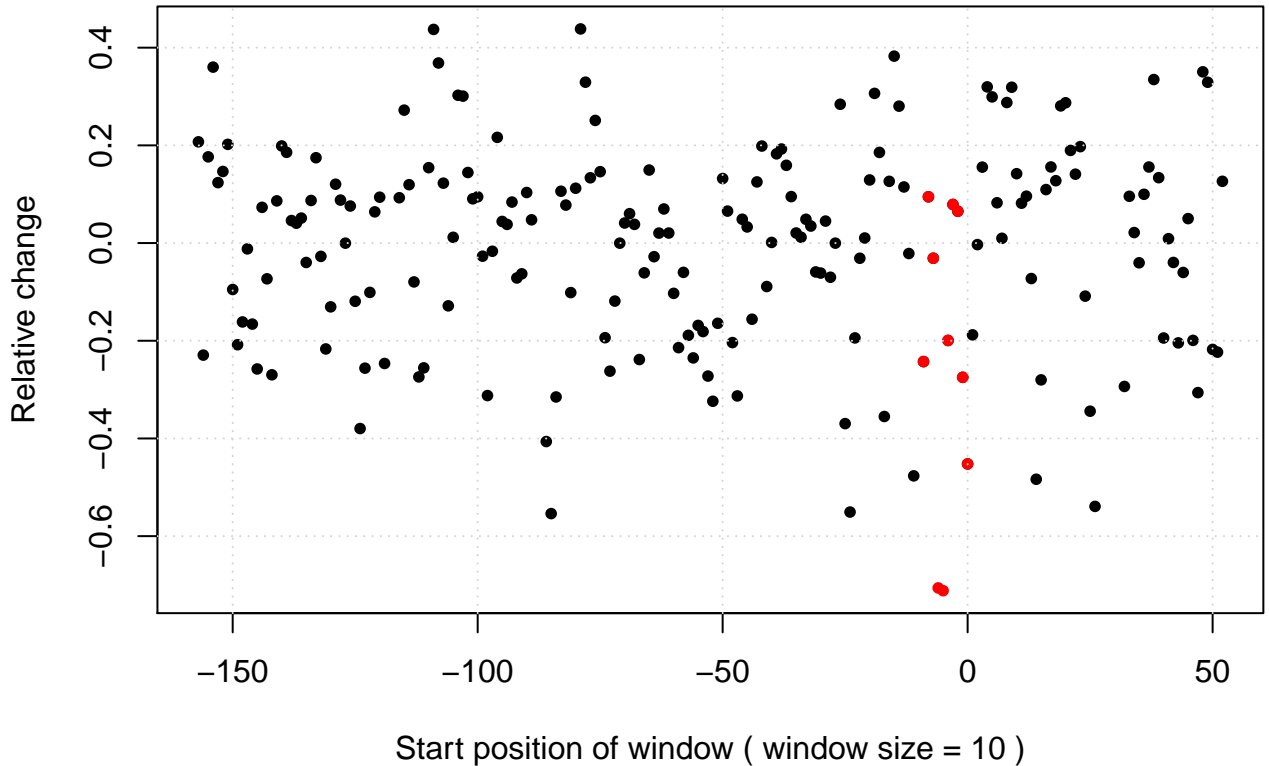

Supplement: supp1 [file elife-47969-supp1-v2.zip]
