# Supplementary material for: Loss of adaptive capacity in asthmatic patients revealed by biomarker fluctuation dynamics after rhinovirus challenge
Source: eLife journal article supplement (doi:10.7554/elife.47969), 2019-11-05

**Patient ID = P01A**  
**Biomarker = PEF (% pred.)**

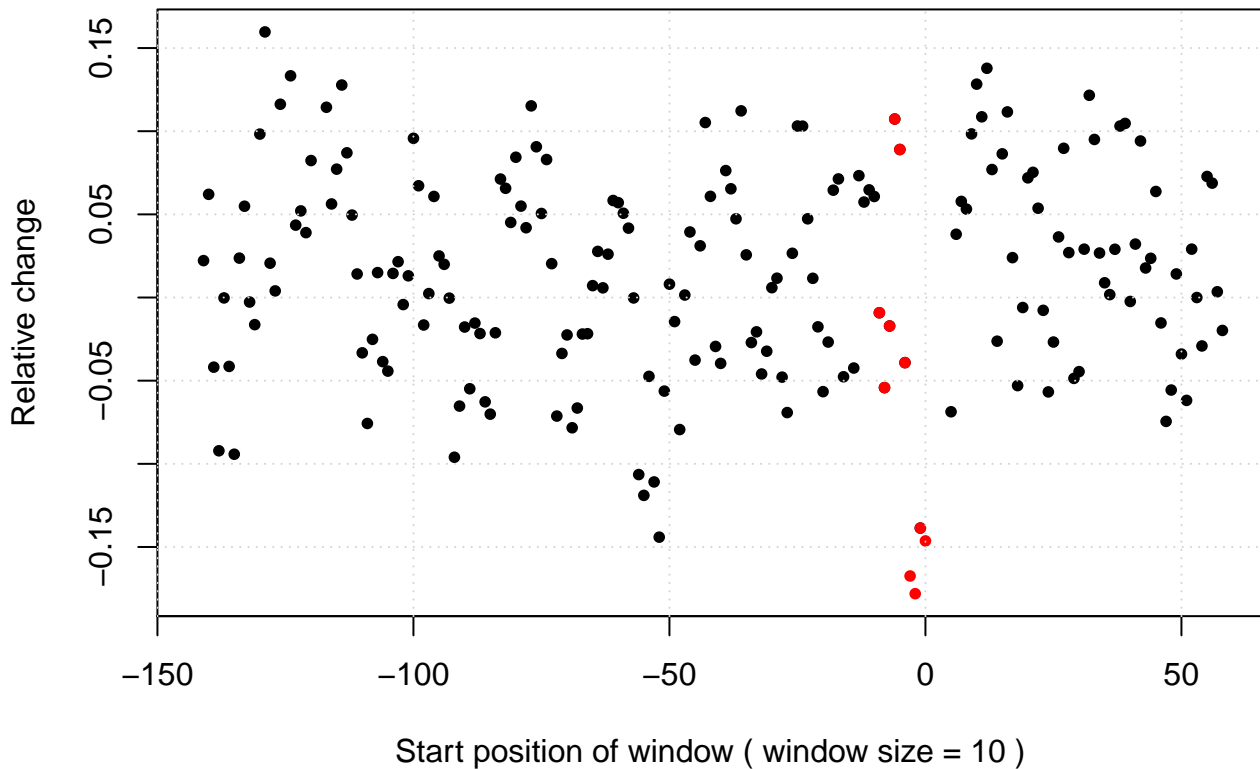

**Patient ID = P02A**  
**Biomarker = PEF (% pred.)**

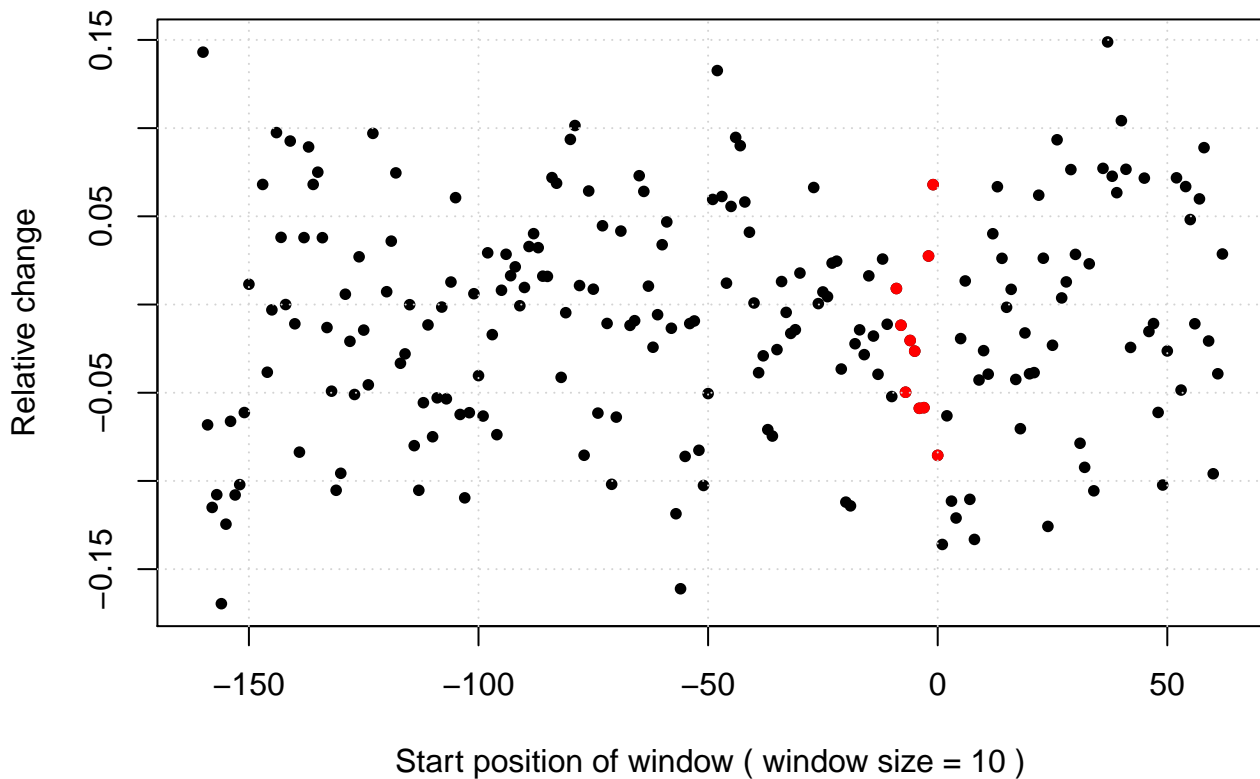

**Patient ID = P04A**  
**Biomarker = PEF (% pred.)**

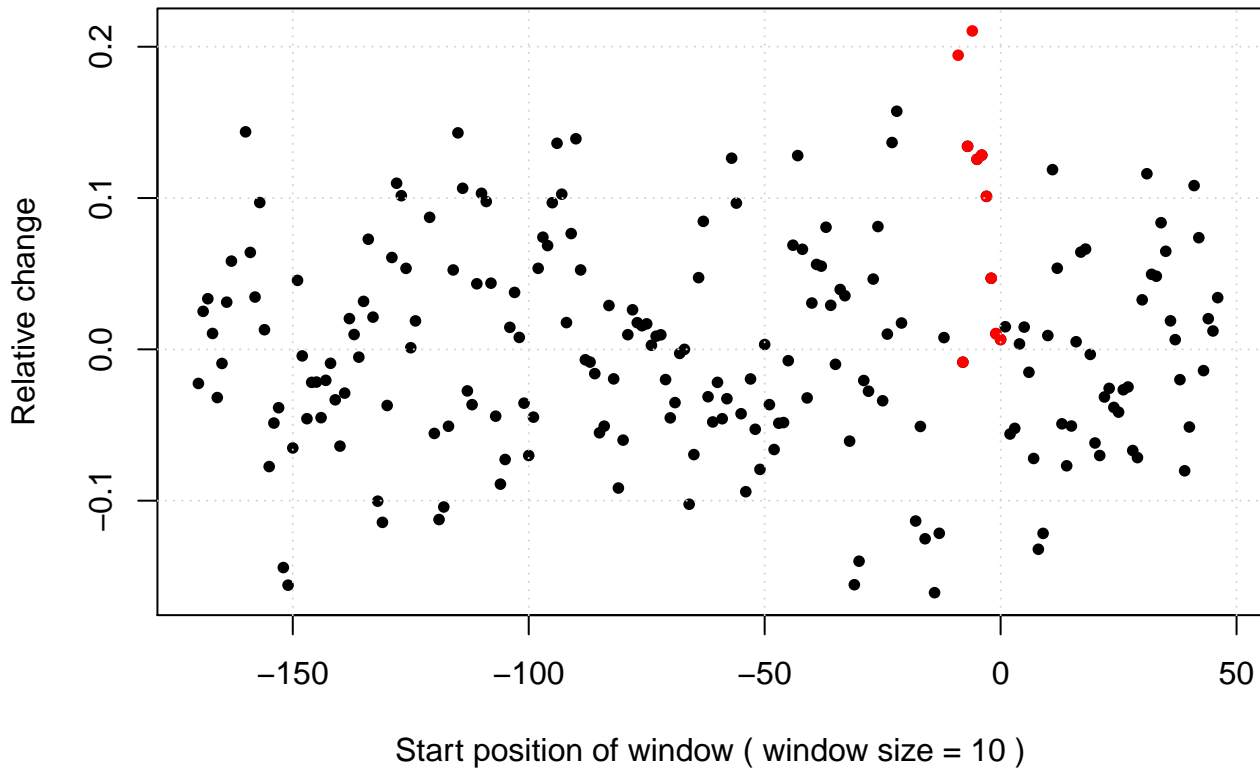

**Patient ID = P05A**  
**Biomarker = PEF (% pred.)**

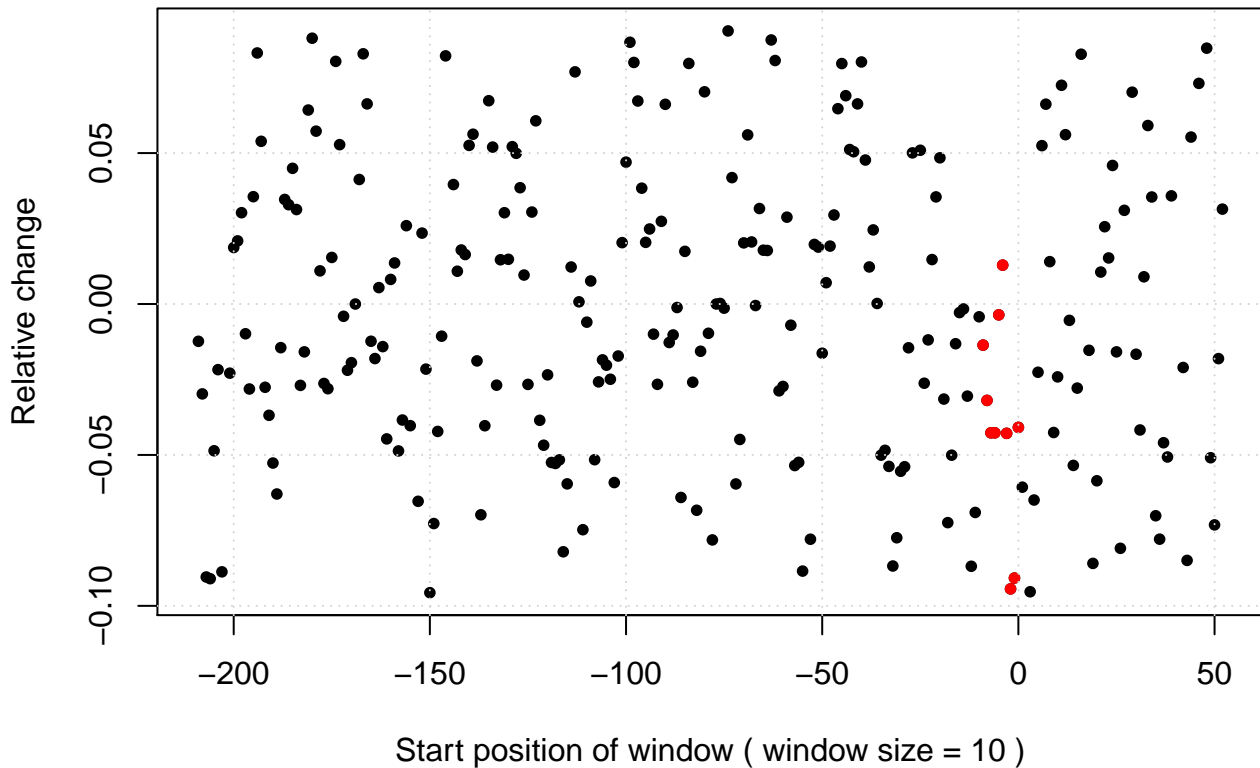

**Patient ID = P06A**  
**Biomarker = PEF (% pred.)**

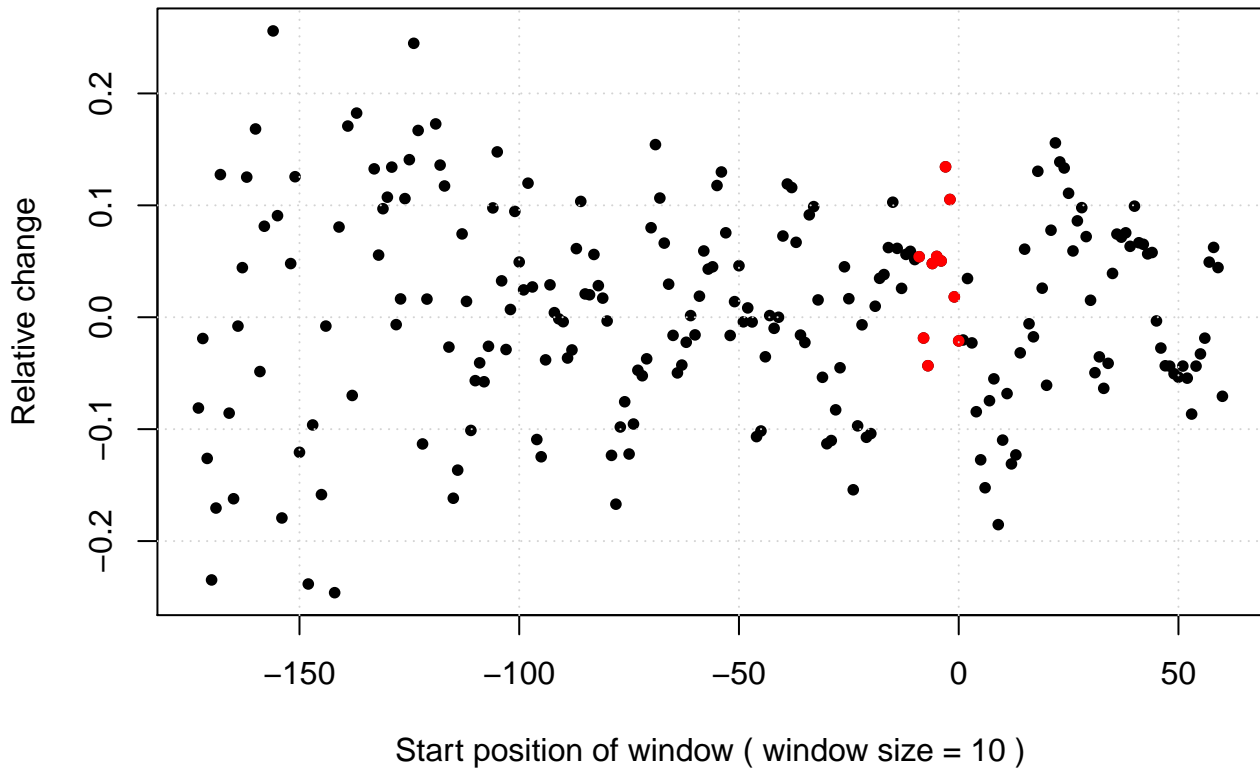

**Patient ID = P07A**  
**Biomarker = PEF (% pred.)**

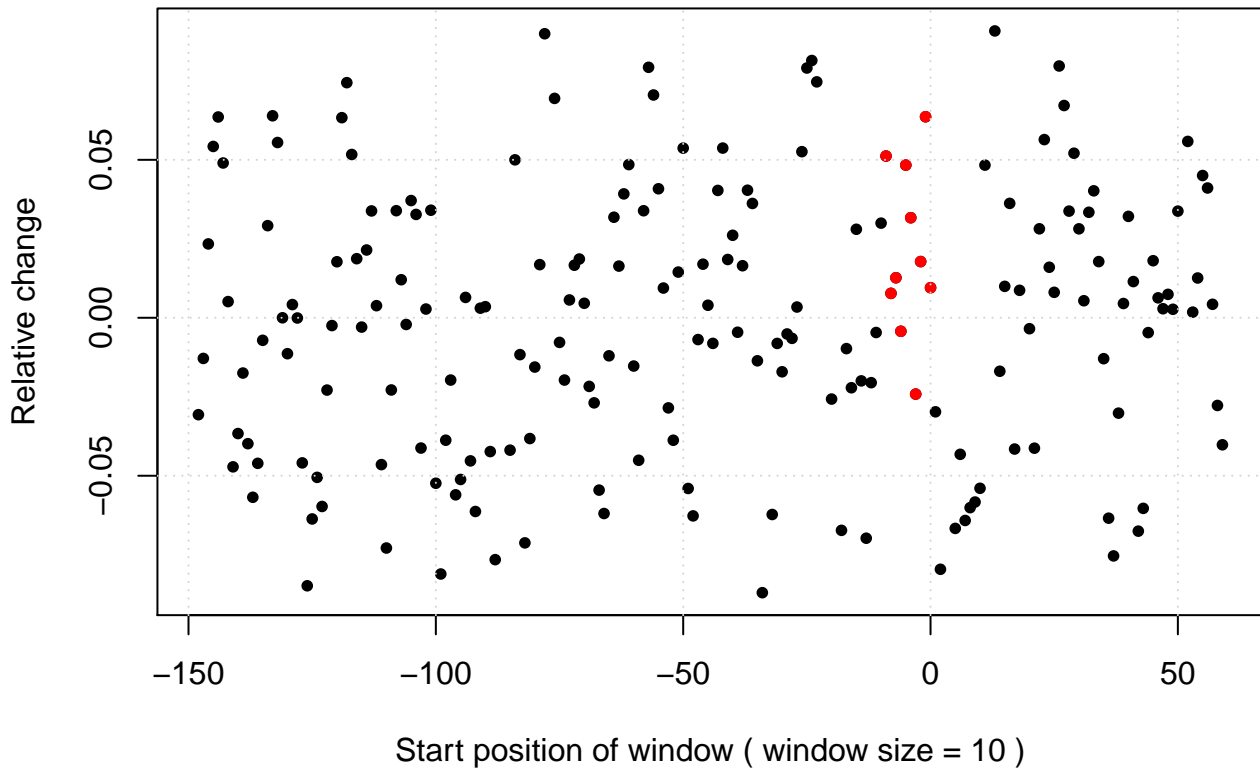

**Patient ID = P08A**  
**Biomarker = PEF (% pred.)**

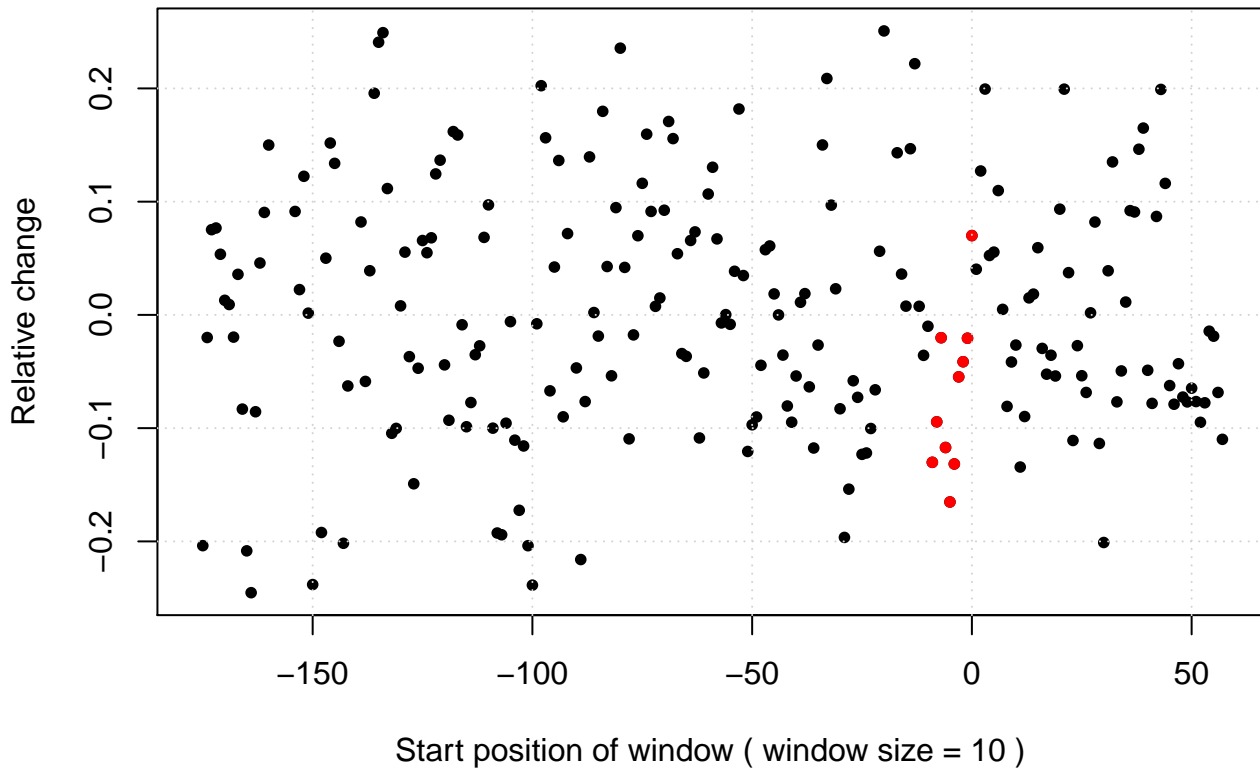

**Patient ID = P09A**  
**Biomarker = PEF (% pred.)**

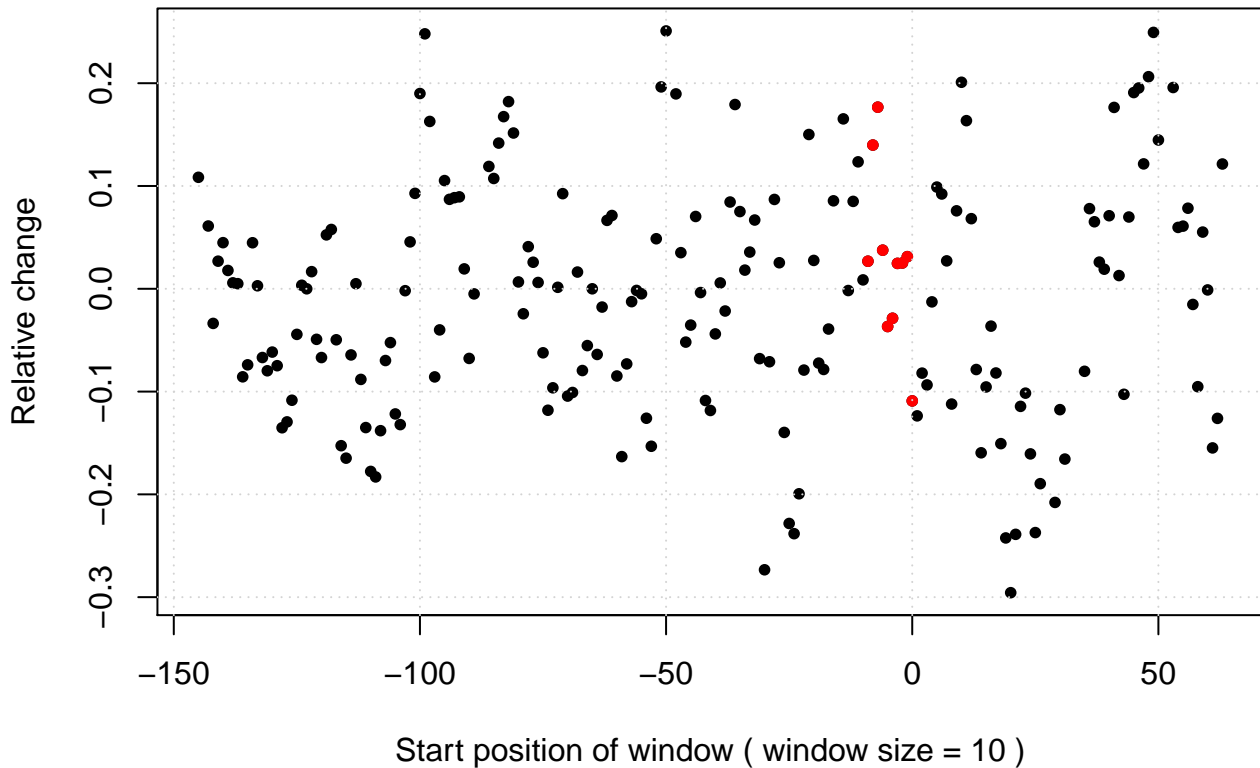

**Patient ID = P10A**  
**Biomarker = PEF (% pred.)**

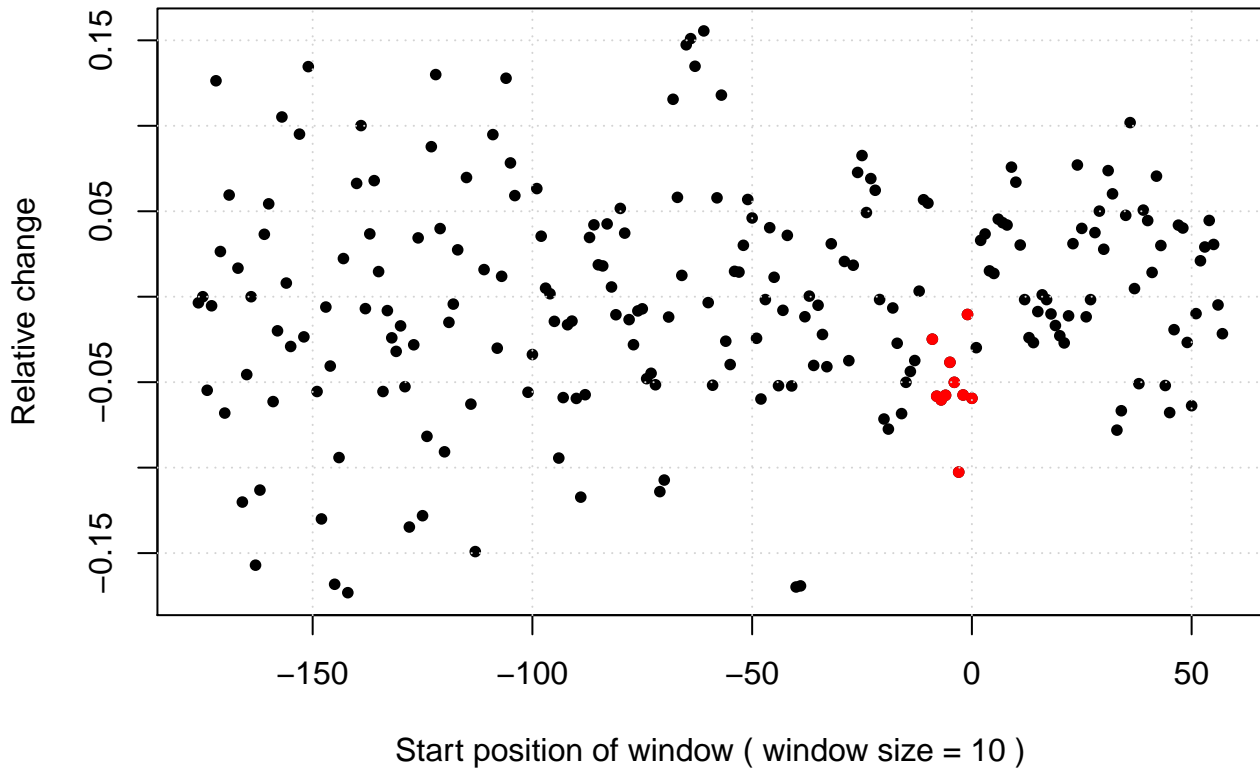

**Patient ID = P11A**  
**Biomarker = PEF (% pred.)**

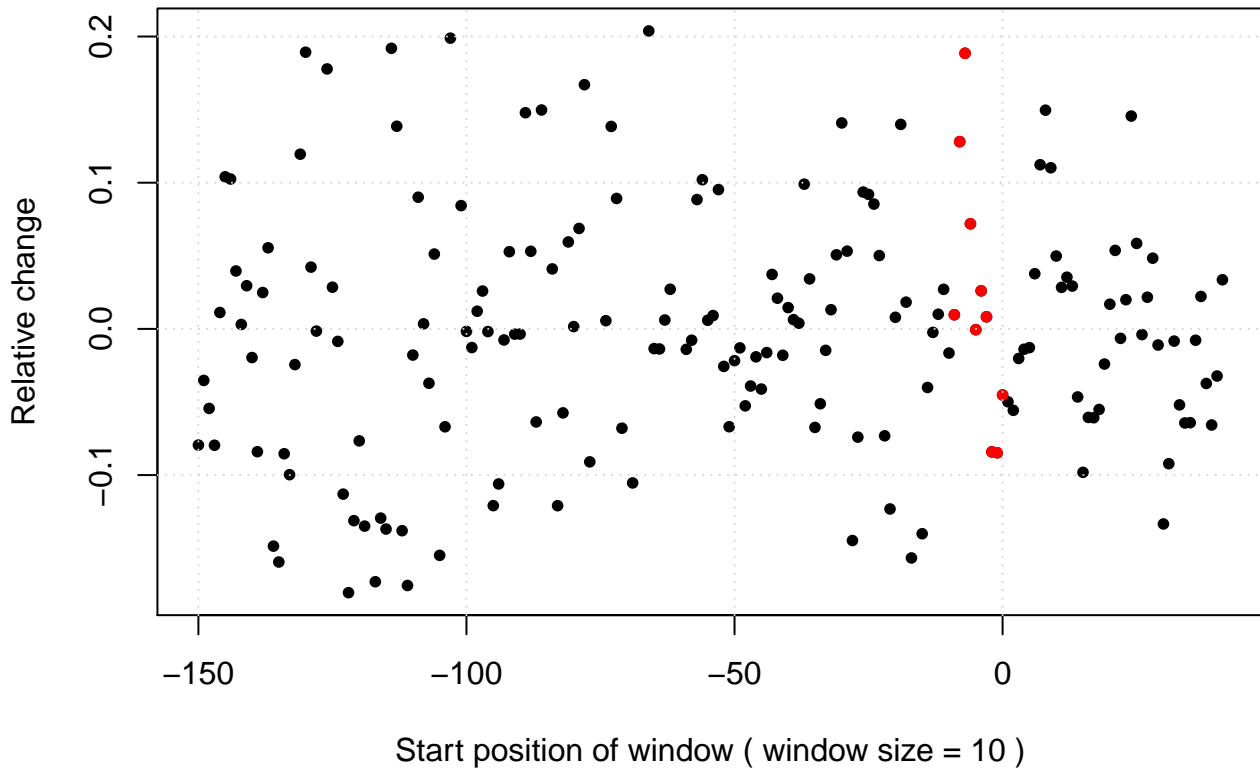

**Patient ID = P12A**  
**Biomarker = PEF (% pred.)**

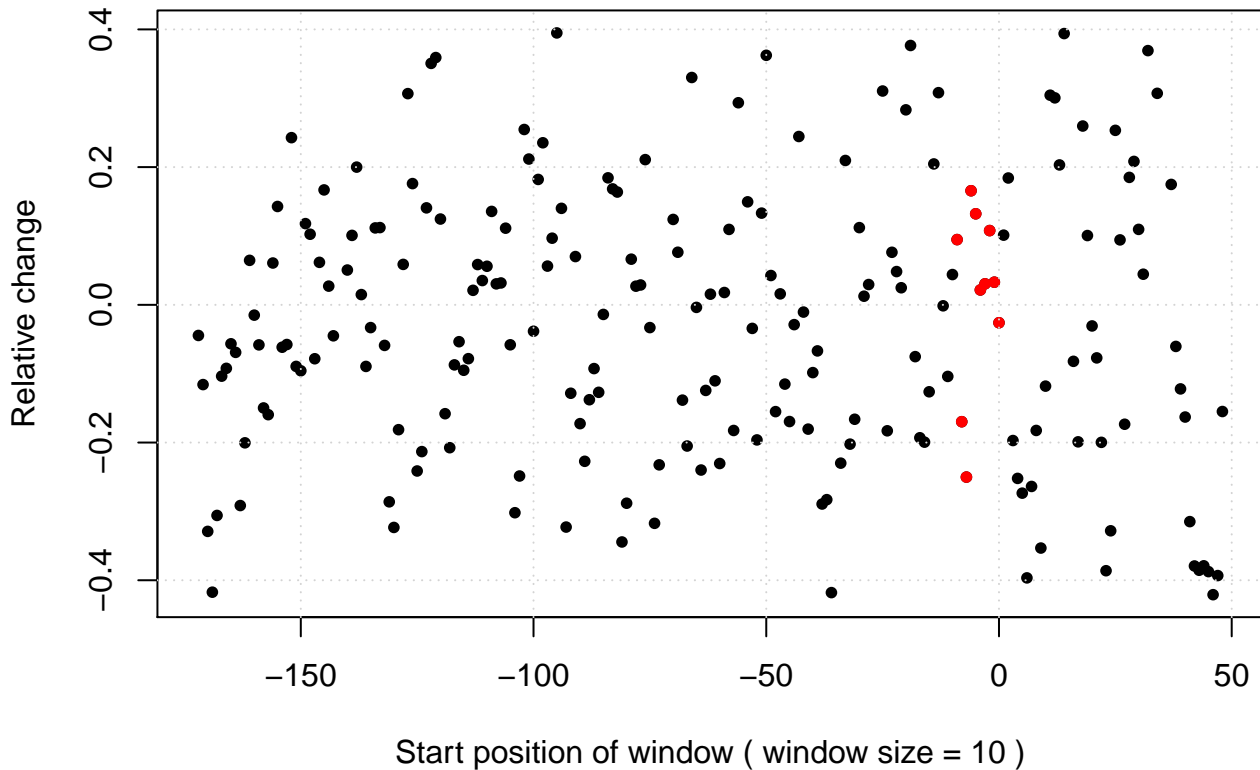

**Patient ID = P13A**  
**Biomarker = PEF (% pred.)**

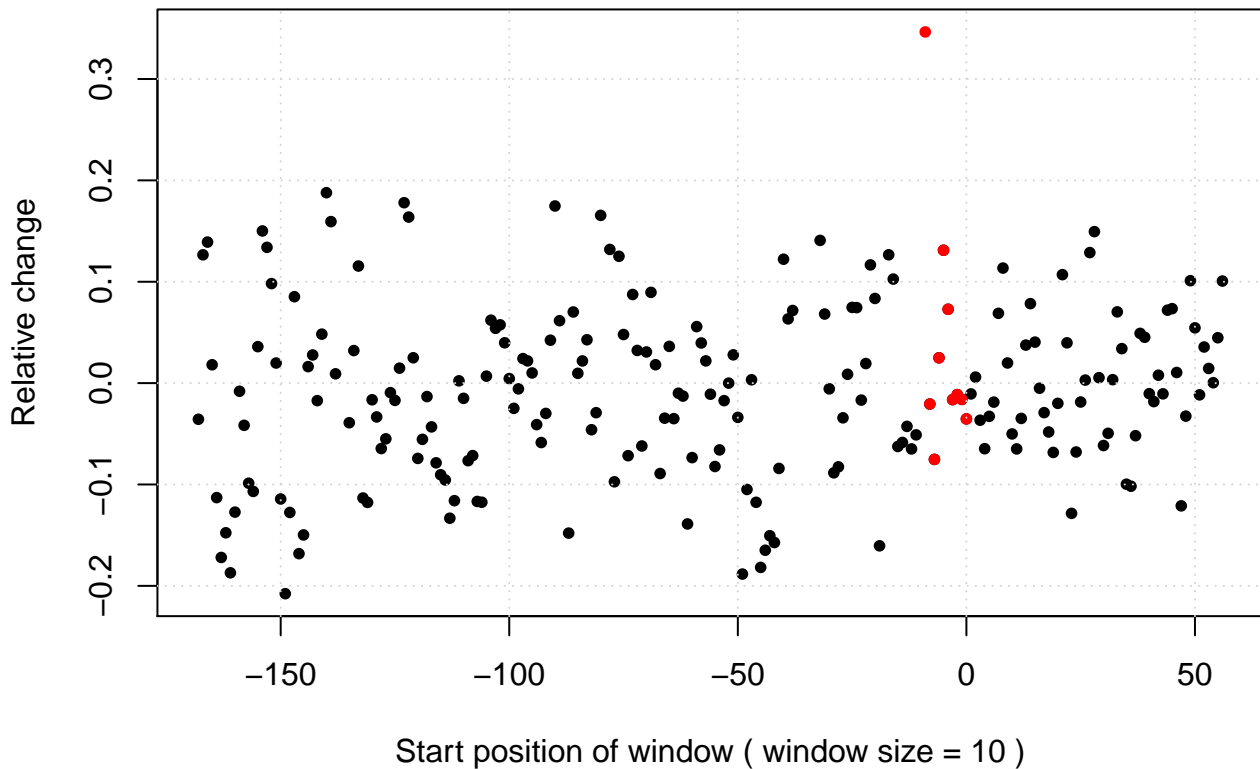

Supplement: supp1 [file elife-47969-supp1-v2.zip]
